# Supplementary material
Source: PubMed Central journal article supplement (PMC4980757)
Supplement: mmc1.pdf [file mmc1.pdf]

| transcript |                  |                 |        |               |             | Distance to |          |          |
|------------|------------------|-----------------|--------|---------------|-------------|-------------|----------|----------|
| chromosome | transcript start | transcript stop | strand | Transcript ID | Gene Symbol | TSS         | Start    | Stop     |
| 1          | 4763279          | 4775808         | -      | NM_001177658  | Mrpl15      | 1218        | 4774390  | 4774590  |
| 1          | 4763279          | 4775808         | -      | NM_025300     | Mrpl15      | 1218        | 4774390  | 4774590  |
| 1          | 4763279          | 4775808         | -      | NR_033530     | Mrpl15      | 1218        | 4774390  | 4774590  |
| 1          | 4797974          | 4836817         | +      | NM_008866     | Lypla1      | -6115       | 4791659  | 4791859  |
| 1          | 4899657          | 5060367         | -      | NM_001177795  | Rgs20       | 128538      | 4931629  | 4931829  |
| 1          | 4899657          | 5008816         | -      | NM_001290372  | Rgs20       | 76987       | 4931629  | 4931829  |
| 1          | 4899657          | 5009621         | -      | NM_021374     | Rgs20       | 77792       | 4931629  | 4931829  |
| 1          | 8349820          | 9289959         | -      | NM_001290390  | Sntg1       | 171888      | 9117871  | 9118071  |
| 1          | 8349820          | 9289959         | -      | NM_001290392  | Sntg1       | 171888      | 9117871  | 9118071  |
| 1          | 8349820          | 9289959         | -      | NM_001290393  | Sntg1       | 171888      | 9117871  | 9118071  |
| 1          | 8349820          | 9289959         | -      | NM_027671     | Sntg1       | 171888      | 9117871  | 9118071  |
| 1          | 9788211          | 9892650         | +      | NM_133220     | Sgk3        | 77049       | 9865260  | 9865460  |
| 1          | 9788211          | 9892650         | +      | NM_177547     | Sgk3        | 77049       | 9865260  | 9865460  |
| 1          | 9838362          | 9892650         | +      | NM_001037759  | Sgk3        | 26898       | 9865260  | 9865460  |
| 1          | 10127588         | 10222752        | -      | NM_001102430  | Arfgef1     | 5645        | 10216907 | 10217107 |
| 1          | 13129186         | 13362511        | -      | NM_001302702  | Ncoa2       | 143732      | 13218579 | 13218779 |
| 1          | 13129186         | 13362511        | -      | NM_001302702  | Ncoa2       | 131170      | 13231141 | 13231341 |
| 1          | 13129186         | 13364165        | -      | NM_008678     | Ncoa2       | 145386      | 13218579 | 13218779 |
| 1          | 13129186         | 13364165        | -      | NM_008678     | Ncoa2       | 132824      | 13231141 | 13231341 |
| 1          | 13615980         | 13650591        | -      | NM_145381     | Lactb2      | -8141       | 13658732 | 13658932 |
| 1          | 13658852         | 13691805        | +      | NM_001011873  | Xkr9        | 0           | 13658732 | 13658932 |
| 1          | 13658852         | 13691805        | +      | NM_001011873  | Xkr9        | 2832        | 13661684 | 13661884 |
| 1          | 15795727         | 15834134        | +      | NM_001286628  | Terf1       | -9750       | 15785777 | 15785977 |
| 1          | 15795727         | 15834134        | +      | NM_001286628  | Terf1       | 529         | 15796256 | 15796456 |
| 1          | 15795727         | 15834134        | +      | NM_009352     | Terf1       | -9750       | 15785777 | 15785977 |
| 1          | 15795727         | 15834134        | +      | NM_009352     | Terf1       | 529         | 15796256 | 15796456 |
| 1          | 16091376         | 16094515        | -      | NM_011291     | Rpl7        | -1901       | 16096416 | 16096616 |
| 1          | 16095963         | 16122632        | +      | NM_133832     | Rdh10       | 453         | 16096416 | 16096616 |

|   |          |            |              |               |        |          |          |
|---|----------|------------|--------------|---------------|--------|----------|----------|
| 1 | 16218891 | 16509384 - | NM_001111272 | Stau2         | 284142 | 16225042 | 16225242 |
| 1 | 16218891 | 16509384 - | NM_025303    | Stau2         | 284142 | 16225042 | 16225242 |
| 1 | 16631806 | 16647201 - | NM_001310470 | Tceb1         | 1618   | 16645383 | 16645583 |
| 1 | 16632846 | 16646947 - | NM_026456    | Tceb1         | 1364   | 16645383 | 16645583 |
| 1 | 16647633 | 16652360 + | NR_037998    | D030040B21Rik | -2050  | 16645383 | 16645583 |
| 1 | 16655272 | 16668357 + | NM_026392    | Tmem70        | -9689  | 16645383 | 16645583 |
| 1 | 16655272 | 16668357 + | NM_027415    | Tmem70        | -9689  | 16645383 | 16645583 |
| 1 | 20991478 | 21069307 - | NM_177409    | Tram2         | 67558  | 21001549 | 21001749 |
| 1 | 21208656 | 21220249 + | NM_001290679 | Tmem14a       | -89    | 21208367 | 21208567 |
| 1 | 21208656 | 21220249 + | NM_029398    | Tmem14a       | -89    | 21208367 | 21208567 |
| 1 | 22278503 | 22812564 - | NM_001012623 | Rims1         | 39056  | 22773308 | 22773508 |
| 1 | 22278503 | 22812564 - | NM_001012624 | Rims1         | 39056  | 22773308 | 22773508 |
| 1 | 22278503 | 22812564 - | NM_001012625 | Rims1         | 39056  | 22773308 | 22773508 |
| 1 | 22278503 | 22812564 - | NM_053270    | Rims1         | 39056  | 22773308 | 22773508 |
| 1 | 22278503 | 22812564 - | NM_183018    | Rims1         | 39056  | 22773308 | 22773508 |
| 1 | 23768765 | 23854698 + | NM_172124    | B3gat2        | 78324  | 23847089 | 23847289 |
| 1 | 24017597 | 24107181 - | NM_026604    | Fam135a       | 82769  | 24024212 | 24024412 |
| 1 | 24017597 | 24107181 - | NM_026604    | Fam135a       | -1992  | 24109173 | 24109373 |
| 1 | 24264522 | 24594277 - | NM_007733    | Col19a1       | 291322 | 24302755 | 24302955 |
| 1 | 24264522 | 24594277 - | NM_007733    | Col19a1       | 158021 | 24436056 | 24436256 |
| 1 | 24264522 | 24594277 - | NM_007733    | Col19a1       | 291926 | 24302151 | 24302351 |
| 1 | 24685383 | 24823147 + | NM_026719    | Lmbrd1        | 60583  | 24745966 | 24746166 |
| 1 | 24685383 | 24823147 + | NM_026719    | Lmbrd1        | 124270 | 24809653 | 24809853 |
| 1 | 24685383 | 24823147 + | NM_026719    | Lmbrd1        | 79716  | 24765099 | 24765299 |
| 1 | 24685757 | 24823145 + | NM_001310483 | Lmbrd1        | 60209  | 24745966 | 24746166 |
| 1 | 24685757 | 24823145 + | NM_001310483 | Lmbrd1        | 123896 | 24809653 | 24809853 |
| 1 | 24685757 | 24823145 + | NM_001310483 | Lmbrd1        | 79342  | 24765099 | 24765299 |
| 1 | 26738646 | 26744306 - | NM_001033764 | 4931408C20Rik | -528   | 26744834 | 26745034 |
| 1 | 26738646 | 26744306 - | NM_001033764 | 4931408C20Rik | 0      | 26744265 | 26744465 |
| 1 | 30859187 | 30920102 - | NM_001081080 | Phf3          | 12122  | 30907780 | 30907980 |

|   |          |            |              |               |        |          |          |
|---|----------|------------|--------------|---------------|--------|----------|----------|
| 1 | 31197923 | 31279502 - | NR_033445    | 4931428L18Rik | 68537  | 31210765 | 31210965 |
| 1 | 33818386 | 33871441 - | NM_001290699 | Zfp451        | -275   | 33871716 | 33871916 |
| 1 | 33818386 | 33871441 - | NM_133817    | Zfp451        | -275   | 33871716 | 33871916 |
| 1 | 33858805 | 33871441 - | NM_001290700 | Zfp451        | -275   | 33871716 | 33871916 |
| 1 | 33965070 | 34365508 + | NM_001276764 | Dst           | 342845 | 34307915 | 34308115 |
| 1 | 33965070 | 34365508 + | NM_001276764 | Dst           | 351863 | 34316933 | 34317133 |
| 1 | 34068670 | 34365508 + | NM_133833    | Dst           | 239245 | 34307915 | 34308115 |
| 1 | 34068670 | 34365508 + | NM_133833    | Dst           | 248263 | 34316933 | 34317133 |
| 1 | 34068670 | 34365508 + | NM_134448    | Dst           | 239245 | 34307915 | 34308115 |
| 1 | 34068670 | 34365508 + | NM_134448    | Dst           | 248263 | 34316933 | 34317133 |
| 1 | 36125245 | 36163292 + | NM_015818    | Hs6st1        | 32882  | 36158127 | 36158327 |
| 1 | 36321447 | 36330271 - | NM_153408    | Neur13        | 501    | 36329570 | 36329770 |
| 1 | 36321447 | 36330271 - | NM_153408    | Neur13        | -971   | 36331242 | 36331442 |
| 1 | 36321447 | 36330271 - | NM_153408    | Neur13        | -2680  | 36332951 | 36333151 |
| 1 | 36321447 | 36330271 - | NM_153408    | Neur13        | -117   | 36330388 | 36330588 |
| 1 | 36429136 | 36478956 + | NM_001277076 | Fer115        | 8032   | 36437168 | 36437368 |
| 1 | 36429136 | 36478956 + | NM_001277076 | Fer115        | 20664  | 36449800 | 36450000 |
| 1 | 36528442 | 36565622 + | NM_033570    | Cnm4          | 13592  | 36542034 | 36542234 |
| 1 | 36528442 | 36565622 + | NM_033570    | Cnm4          | 4308   | 36532750 | 36532950 |
| 1 | 36595016 | 36604098 - | NM_001310533 | Ankrd39       | 172    | 36603726 | 36603926 |
| 1 | 36595016 | 36604098 - | NM_026241    | Ankrd39       | 172    | 36603726 | 36603926 |
| 1 | 36595016 | 36604098 - | NR_132321    | Ankrd39       | 172    | 36603726 | 36603926 |
| 1 | 36619541 | 36740029 - | NM_001126046 | Fam178b       | 18434  | 36721395 | 36721595 |
| 1 | 36619541 | 36740029 - | NM_001126046 | Fam178b       | -1012  | 36741041 | 36741241 |
| 1 | 36619541 | 36740029 - | NM_001126046 | Fam178b       | 105288 | 36634541 | 36634741 |
| 1 | 36619541 | 36740029 - | NM_001126046 | Fam178b       | 72978  | 36666851 | 36667051 |
| 1 | 36619541 | 36650178 - | NM_027957    | Fam178b       | 15437  | 36634541 | 36634741 |
| 1 | 36656819 | 36740029 - | NM_201365    | Fam178b       | 18434  | 36721395 | 36721595 |
| 1 | 36656819 | 36740029 - | NM_201365    | Fam178b       | -1012  | 36741041 | 36741241 |
| 1 | 36656819 | 36740029 - | NM_201365    | Fam178b       | 72978  | 36666851 | 36667051 |

|   |          |            |              |               |        |          |          |
|---|----------|------------|--------------|---------------|--------|----------|----------|
| 1 | 36748332 | 36750234 + | NM_009942    | Cox5b         | -7091  | 36741041 | 36741241 |
| 1 | 36818643 | 36839666 + | NM_009539    | Zap70         | 10943  | 36829586 | 36829786 |
| 1 | 36821360 | 36839666 + | NM_001289766 | Zap70         | 8226   | 36829586 | 36829786 |
| 1 | 36823779 | 36839666 + | NM_001289765 | Zap70         | 5807   | 36829586 | 36829786 |
| 1 | 36835829 | 36839666 + | NM_001289612 | Zap70         | -6043  | 36829586 | 36829786 |
| 1 | 36849034 | 36996373 - | NM_018872    | Tmem131       | 12958  | 36983215 | 36983415 |
| 1 | 36849034 | 36996373 - | NM_018872    | Tmem131       | 2637   | 36993536 | 36993736 |
| 1 | 36849034 | 36996373 - | NM_018872    | Tmem131       | 12439  | 36983734 | 36983934 |
| 1 | 36849034 | 36996373 - | NM_018872    | Tmem131       | 18955  | 36977218 | 36977418 |
| 1 | 37356683 | 37467586 + | NM_001290797 | Inpp4a        | -610   | 37355873 | 37356073 |
| 1 | 37356683 | 37467586 + | NM_001290797 | Inpp4a        | 17604  | 37374287 | 37374487 |
| 1 | 37356683 | 37467586 + | NM_030266    | Inpp4a        | -610   | 37355873 | 37356073 |
| 1 | 37356683 | 37467586 + | NM_030266    | Inpp4a        | 17604  | 37374287 | 37374487 |
| 1 | 37496185 | 37593250 - | NM_001290801 | Mgat4a        | 36850  | 37556200 | 37556400 |
| 1 | 37496185 | 37593250 - | NM_001290801 | Mgat4a        | -1396  | 37594646 | 37594846 |
| 1 | 37496185 | 37593250 - | NM_001290801 | Mgat4a        | 24128  | 37568922 | 37569122 |
| 1 | 37496185 | 37593250 - | NM_001290801 | Mgat4a        | 18251  | 37574799 | 37574999 |
| 1 | 37496185 | 37593250 - | NM_001290801 | Mgat4a        | 33560  | 37559490 | 37559690 |
| 1 | 37496185 | 37593250 - | NM_001290801 | Mgat4a        | 56354  | 37536696 | 37536896 |
| 1 | 37496185 | 37597862 - | NM_173870    | Mgat4a        | 41462  | 37556200 | 37556400 |
| 1 | 37496185 | 37597862 - | NM_173870    | Mgat4a        | 3016   | 37594646 | 37594846 |
| 1 | 37496185 | 37597862 - | NM_173870    | Mgat4a        | 28740  | 37568922 | 37569122 |
| 1 | 37496185 | 37597862 - | NM_173870    | Mgat4a        | 22863  | 37574799 | 37574999 |
| 1 | 37496185 | 37597862 - | NM_173870    | Mgat4a        | 38172  | 37559490 | 37559690 |
| 1 | 37496185 | 37597862 - | NM_173870    | Mgat4a        | 60966  | 37536696 | 37536896 |
| 1 | 37668521 | 37776657 - | NM_028096    | 2010300C02Rik | 103281 | 37673176 | 37673376 |
| 1 | 37668521 | 37776657 - | NM_028096    | 2010300C02Rik | 24912  | 37751545 | 37751745 |
| 1 | 37668521 | 37776657 - | NM_028096    | 2010300C02Rik | 104865 | 37671592 | 37671792 |
| 1 | 38109631 | 38186508 - | NM_019570    | Rev1          | -3266  | 38189774 | 38189974 |
| 1 | 39251117 | 39420086 + | NM_008719    | Npas2         | 10918  | 39262035 | 39262235 |

|   |          |            |              |        |        |          |          |
|---|----------|------------|--------------|--------|--------|----------|----------|
| 1 | 39251117 | 39420086 + | NM_008719    | Npas2  | 46745  | 39297862 | 39298062 |
| 1 | 39251117 | 39420086 + | NM_008719    | Npas2  | 138317 | 39389434 | 39389634 |
| 1 | 39251117 | 39420086 + | NM_008719    | Npas2  | 12667  | 39263784 | 39263984 |
| 1 | 39251117 | 39420086 + | NM_008719    | Npas2  | 40918  | 39292035 | 39292235 |
| 1 | 39251117 | 39420086 + | NM_008719    | Npas2  | 11520  | 39262637 | 39262837 |
| 1 | 39428342 | 39535593 - | NM_018775    | Tbc1d8 | 39862  | 39495531 | 39495731 |
| 1 | 39428342 | 39535593 - | NM_018775    | Tbc1d8 | 11066  | 39524327 | 39524527 |
| 1 | 39592647 | 39603723 + | NM_028043    | Cnot11 | 1035   | 39593682 | 39593882 |
| 1 | 39608144 | 39634193 - | NM_001033135 | Rnf149 | 3144   | 39630849 | 39631049 |
| 1 | 39957758 | 40083156 + | NM_001252200 | Map4k4 | -2016  | 39955542 | 39955742 |
| 1 | 39957758 | 40083156 + | NM_001252200 | Map4k4 | 48237  | 40005995 | 40006195 |
| 1 | 39957758 | 40083156 + | NM_001252201 | Map4k4 | -2016  | 39955542 | 39955742 |
| 1 | 39957758 | 40083156 + | NM_001252201 | Map4k4 | 48237  | 40005995 | 40006195 |
| 1 | 39957758 | 40083156 + | NM_001252202 | Map4k4 | -2016  | 39955542 | 39955742 |
| 1 | 39957758 | 40083156 + | NM_001252202 | Map4k4 | 48237  | 40005995 | 40006195 |
| 1 | 39957758 | 40083156 + | NM_008696    | Map4k4 | -2016  | 39955542 | 39955742 |
| 1 | 39957758 | 40083156 + | NM_008696    | Map4k4 | 48237  | 40005995 | 40006195 |
| 1 | 40381472 | 40422317 + | NM_133193    | Il1rl2 | 30848  | 40412320 | 40412520 |
| 1 | 40637072 | 40687577 + | NM_177084    | Slc9a4 | 22441  | 40659513 | 40659713 |
| 1 | 40738557 | 40825731 + | NM_001033289 | Slc9a2 | 27586  | 40766143 | 40766343 |
| 1 | 40738557 | 40825731 + | NM_001033289 | Slc9a2 | 83106  | 40821663 | 40821863 |
| 1 | 40828885 | 40847503 - | NM_172499    | Mfsd9  | 13590  | 40833713 | 40833913 |
| 1 | 42807557 | 42809732 + | NR_130904    | Dalir  | -8853  | 42798504 | 42798704 |
| 1 | 43179916 | 43253607 - | NM_001289533 | Fhl2   | 43799  | 43209608 | 43209808 |
| 1 | 43179916 | 43253607 - | NM_001289533 | Fhl2   | 27566  | 43225841 | 43226041 |
| 1 | 43179916 | 43253607 - | NM_001289533 | Fhl2   | 41536  | 43211871 | 43212071 |
| 1 | 43179916 | 43253607 - | NM_001289533 | Fhl2   | 52588  | 43200819 | 43201019 |
| 1 | 43179916 | 43253607 - | NM_001289533 | Fhl2   | 51033  | 43202374 | 43202574 |
| 1 | 43179916 | 43220807 - | NM_010212    | Fhl2   | 10999  | 43209608 | 43209808 |
| 1 | 43179916 | 43220807 - | NM_010212    | Fhl2   | -5034  | 43225841 | 43226041 |

|   |          |            |              |         |        |          |          |
|---|----------|------------|--------------|---------|--------|----------|----------|
| 1 | 43179916 | 43220807 - | NM_010212    | Fhl2    | 8736   | 43211871 | 43212071 |
| 1 | 43179916 | 43220807 - | NM_010212    | Fhl2    | 19788  | 43200819 | 43201019 |
| 1 | 43179916 | 43220807 - | NM_010212    | Fhl2    | 18233  | 43202374 | 43202574 |
| 1 | 43502596 | 43627364 + | NM_010879    | Nck2    | 1539   | 43504135 | 43504335 |
| 1 | 43502596 | 43627364 + | NM_010879    | Nck2    | 76395  | 43578991 | 43579191 |
| 1 | 43807076 | 43884554 - | NM_026430    | Uxs1    | 6453   | 43877901 | 43878101 |
| 1 | 43990839 | 44059846 + | NM_001310540 | Tpp2    | 57902  | 44048741 | 44048941 |
| 1 | 43990839 | 44059846 + | NM_009418    | Tpp2    | 57902  | 44048741 | 44048941 |
| 1 | 44143462 | 44159234 - | NM_029368    | Tex30   | 649    | 44158385 | 44158585 |
| 1 | 44143462 | 44159234 - | NM_029368    | Tex30   | -193   | 44159427 | 44159627 |
| 1 | 44176813 | 44201617 + | NM_144558    | Bivm    | 10345  | 44187158 | 44187358 |
| 1 | 52176282 | 52218710 + | NM_001205314 | Stat1   | 23542  | 52199824 | 52200024 |
| 1 | 52176282 | 52218710 + | NM_009283    | Stat1   | 23542  | 52199824 | 52200024 |
| 1 | 52176466 | 52218710 + | NM_001205313 | Stat1   | 23358  | 52199824 | 52200024 |
| 1 | 52220294 | 52290077 - | NM_001081081 | Gls     | 6728   | 52283149 | 52283349 |
| 1 | 52220294 | 52290077 - | NM_001081081 | Gls     | 3355   | 52286522 | 52286722 |
| 1 | 52220294 | 52290077 - | NM_001081081 | Gls     | 61647  | 52228230 | 52228430 |
| 1 | 52220294 | 52290077 - | NM_001081081 | Gls     | 56680  | 52233197 | 52233397 |
| 1 | 52242125 | 52290077 - | NM_001113383 | Gls     | 6728   | 52283149 | 52283349 |
| 1 | 52242125 | 52290077 - | NM_001113383 | Gls     | 3355   | 52286522 | 52286722 |
| 1 | 52846264 | 52874533 - | NM_008384    | Inpp1   | 8880   | 52865453 | 52865653 |
| 1 | 53370468 | 53383187 + | NM_001285839 | Osgepl1 | 11523  | 53381991 | 53382191 |
| 1 | 53370468 | 53383187 + | NR_104360    | Osgepl1 | 11523  | 53381991 | 53382191 |
| 1 | 53370468 | 53383187 + | NR_104361    | Osgepl1 | 11523  | 53381991 | 53382191 |
| 1 | 53812356 | 53842060 - | NM_133810    | Stk17b  | 711    | 53841149 | 53841349 |
| 1 | 53812356 | 53842060 - | NM_133810    | Stk17b  | -9149  | 53851209 | 53851409 |
| 1 | 53863718 | 54251879 - | NM_001001883 | Hecw2   | 380328 | 53871351 | 53871551 |
| 1 | 53863718 | 54251879 - | NM_001001883 | Hecw2   | 311751 | 53939928 | 53940128 |
| 1 | 53863718 | 54251879 - | NM_001001883 | Hecw2   | 300294 | 53951385 | 53951585 |
| 1 | 53863718 | 54251879 - | NM_001001883 | Hecw2   | 304929 | 53946750 | 53946950 |

|   |          |            |              |          |        |          |          |
|---|----------|------------|--------------|----------|--------|----------|----------|
| 1 | 53863718 | 54251879 - | NM_001001883 | Hecw2    | 372678 | 53879001 | 53879201 |
| 1 | 53863718 | 54251879 - | NM_001001883 | Hecw2    | 343978 | 53907701 | 53907901 |
| 1 | 53863718 | 54251879 - | NM_001001883 | Hecw2    | 379387 | 53872292 | 53872492 |
| 1 | 53906268 | 53906340 + | NR_106149    | Mir7681  | 1433   | 53907701 | 53907901 |
| 1 | 54454425 | 54495816 - | NM_001033194 | Gtf3c3   | 32717  | 54462899 | 54463099 |
| 1 | 54529844 | 54614529 - | NM_001163314 | Pgap1    | 19692  | 54594637 | 54594837 |
| 1 | 54702184 | 54983232 - | NM_001081433 | Ankrd44  | 178067 | 54804965 | 54805165 |
| 1 | 54702184 | 54983232 - | NM_001081433 | Ankrd44  | 154600 | 54828432 | 54828632 |
| 1 | 54702184 | 54983232 - | NM_001081433 | Ankrd44  | 168815 | 54814217 | 54814417 |
| 1 | 55042013 | 55084323 - | NM_031179    | Sf3b1    | 4366   | 55079757 | 55079957 |
| 1 | 55042013 | 55084323 - | NM_031179    | Sf3b1    | 26663  | 55057460 | 55057660 |
| 1 | 55134678 | 55144777 - | NM_010477    | Hspd1    | -788   | 55145565 | 55145765 |
| 1 | 55144992 | 55148162 + | NM_008303    | Hspe1    | 573    | 55145565 | 55145765 |
| 1 | 55227004 | 55283627 - | NM_028713    | Rftn2    | 52648  | 55230779 | 55230979 |
| 1 | 55227004 | 55283627 - | NM_028713    | Rftn2    | 13019  | 55270408 | 55270608 |
| 1 | 56850825 | 57028179 - | NM_139146    | Satb2    | 44539  | 56983440 | 56983640 |
| 1 | 57831705 | 58005242 + | NM_144882    | Spats2l  | 140995 | 57972700 | 57972900 |
| 1 | 57831705 | 58005242 + | NM_144882    | Spats2l  | 147631 | 57979336 | 57979536 |
| 1 | 57831705 | 58005242 + | NM_144882    | Spats2l  | 77443  | 57909148 | 57909348 |
| 1 | 57831705 | 58005242 + | NM_144882    | Spats2l  | 77791  | 57909496 | 57909696 |
| 1 | 57902415 | 58005242 + | NM_001164566 | Spats2l  | 70285  | 57972700 | 57972900 |
| 1 | 57902415 | 58005242 + | NM_001164566 | Spats2l  | 76921  | 57979336 | 57979536 |
| 1 | 57902415 | 58005242 + | NM_001164566 | Spats2l  | 6733   | 57909148 | 57909348 |
| 1 | 57902415 | 58005242 + | NM_001164566 | Spats2l  | 7081   | 57909496 | 57909696 |
| 1 | 58042184 | 58082742 + | NM_001177867 | Sgol2a   | 29061  | 58071245 | 58071445 |
| 1 | 58052818 | 58083122 + | NM_199007    | Sgol2a   | 18427  | 58071245 | 58071445 |
| 1 | 58335170 | 58436109 + | NM_001008419 | Aox2     | 80768  | 58415938 | 58416138 |
| 1 | 58335170 | 58436109 + | NM_001008419 | Aox2     | 68015  | 58403185 | 58403385 |
| 1 | 58714965 | 58752834 - | NM_175370    | Als2cr12 | 3239   | 58749395 | 58749595 |
| 1 | 58714965 | 58752834 - | NM_175370    | Als2cr12 | 3994   | 58748640 | 58748840 |

|   |          |            |              |         |        |          |          |
|---|----------|------------|--------------|---------|--------|----------|----------|
| 1 | 58768335 | 58816054 + | NM_001289704 | Cflar   | 1040   | 58769375 | 58769575 |
| 1 | 58768335 | 58816054 + | NM_001293804 | Cflar   | 1040   | 58769375 | 58769575 |
| 1 | 58770130 | 58790072 + | NM_009805    | Cflar   | -555   | 58769375 | 58769575 |
| 1 | 58770130 | 58816054 + | NM_207653    | Cflar   | -555   | 58769375 | 58769575 |
| 1 | 58852218 | 58904348 + | NM_009812    | Casp8   | -8778  | 58843240 | 58843440 |
| 1 | 58957294 | 59030327 - | NM_172406    | Trak2   | 19191  | 59010936 | 59011136 |
| 1 | 59177779 | 59220234 - | NM_001164682 | Mpp4    | -4983  | 59225217 | 59225417 |
| 1 | 59177779 | 59220234 - | NM_001164682 | Mpp4    | -2881  | 59223115 | 59223315 |
| 1 | 59177779 | 59218481 - | NM_145143    | Mpp4    | -6736  | 59225217 | 59225417 |
| 1 | 59177779 | 59218481 - | NM_145143    | Mpp4    | -4634  | 59223115 | 59223315 |
| 1 | 59219600 | 59293938 - | NM_001159948 | Als2    | 68521  | 59225217 | 59225417 |
| 1 | 59219600 | 59293938 - | NM_001159948 | Als2    | -904   | 59294842 | 59295042 |
| 1 | 59219600 | 59293938 - | NM_001159948 | Als2    | 24404  | 59269334 | 59269534 |
| 1 | 59219600 | 59293938 - | NM_001159948 | Als2    | 70623  | 59223115 | 59223315 |
| 1 | 59219600 | 59294076 - | NM_028717    | Als2    | 68659  | 59225217 | 59225417 |
| 1 | 59219600 | 59294076 - | NM_028717    | Als2    | -766   | 59294842 | 59295042 |
| 1 | 59219600 | 59294076 - | NM_028717    | Als2    | 24542  | 59269334 | 59269534 |
| 1 | 59219600 | 59294076 - | NM_028717    | Als2    | 70761  | 59223115 | 59223315 |
| 1 | 59248467 | 59294076 - | NM_146109    | Als2    | -766   | 59294842 | 59295042 |
| 1 | 59248467 | 59294076 - | NM_146109    | Als2    | 24542  | 59269334 | 59269534 |
| 1 | 59313751 | 59409214 + | NM_001033373 | Cdk15   | 64573  | 59378324 | 59378524 |
| 1 | 59538991 | 59543800 + | NM_008057    | Fzd7    | -6200  | 59532591 | 59532791 |
| 1 | 59696278 | 59727679 - | NM_009460    | Sumo1   | 12034  | 59715445 | 59715645 |
| 1 | 59969850 | 60042193 + | NM_001037725 | Fam117b | 11519  | 59981369 | 59981569 |
| 1 | 60237443 | 60391550 + | NM_173444    | Nbeal1  | 33595  | 60271038 | 60271238 |
| 1 | 60540029 | 60623610 - | NM_001045513 | Raph1   | -2034  | 60625644 | 60625844 |
| 1 | 61685398 | 62688859 + | NM_001081050 | Pard3b  | 12746  | 61698144 | 61698344 |
| 1 | 61685398 | 62688859 + | NM_001081050 | Pard3b  | 538549 | 62223947 | 62224147 |
| 1 | 61685398 | 62688859 + | NM_001081050 | Pard3b  | 749402 | 62434800 | 62435000 |
| 1 | 61685398 | 62688859 + | NM_001081050 | Pard3b  | 744053 | 62429451 | 62429651 |



|   |          |            |              |          |        |          |          |
|---|----------|------------|--------------|----------|--------|----------|----------|
| 1 | 61685398 | 62688859 + | NM_001081050 | Pard3b   | 397251 | 62082649 | 62082849 |
| 1 | 61685398 | 62688859 + | NM_001081050 | Pard3b   | 423427 | 62108825 | 62109025 |
| 1 | 61685398 | 62688859 + | NM_001081050 | Pard3b   | 483726 | 62169124 | 62169324 |
| 1 | 61685398 | 62688859 + | NM_001081050 | Pard3b   | 399981 | 62085379 | 62085579 |
| 1 | 61685398 | 62688859 + | NM_001081050 | Pard3b   | 47924  | 61733322 | 61733522 |
| 1 | 61685398 | 62688859 + | NM_001081050 | Pard3b   | 98990  | 61784388 | 61784588 |
| 1 | 61685398 | 62688859 + | NM_001081050 | Pard3b   | 13094  | 61698492 | 61698692 |
| 1 | 62749891 | 62865267 + | NM_001077403 | Nrp2     | 4098   | 62753989 | 62754189 |
| 1 | 62749891 | 62865267 + | NM_001077403 | Nrp2     | 80433  | 62830324 | 62830524 |
| 1 | 62749891 | 62865267 + | NM_001077403 | Nrp2     | -3152  | 62746539 | 62746739 |
| 1 | 62749891 | 62865267 + | NM_001077404 | Nrp2     | 4098   | 62753989 | 62754189 |
| 1 | 62749891 | 62865267 + | NM_001077404 | Nrp2     | 80433  | 62830324 | 62830524 |
| 1 | 62749891 | 62865267 + | NM_001077404 | Nrp2     | -3152  | 62746539 | 62746739 |
| 1 | 62749891 | 62865267 + | NM_001077405 | Nrp2     | 4098   | 62753989 | 62754189 |
| 1 | 62749891 | 62865267 + | NM_001077405 | Nrp2     | 80433  | 62830324 | 62830524 |
| 1 | 62749891 | 62865267 + | NM_001077405 | Nrp2     | -3152  | 62746539 | 62746739 |
| 1 | 62749891 | 62843666 + | NM_001077406 | Nrp2     | 4098   | 62753989 | 62754189 |
| 1 | 62749891 | 62843666 + | NM_001077406 | Nrp2     | 80433  | 62830324 | 62830524 |
| 1 | 62749891 | 62843666 + | NM_001077406 | Nrp2     | -3152  | 62746539 | 62746739 |
| 1 | 62749891 | 62843666 + | NM_001077407 | Nrp2     | 4098   | 62753989 | 62754189 |
| 1 | 62749891 | 62843666 + | NM_001077407 | Nrp2     | 80433  | 62830324 | 62830524 |
| 1 | 62749891 | 62843666 + | NM_001077407 | Nrp2     | -3152  | 62746539 | 62746739 |
| 1 | 62749891 | 62865267 + | NM_010939    | Nrp2     | 4098   | 62753989 | 62754189 |
| 1 | 62749891 | 62865267 + | NM_010939    | Nrp2     | 80433  | 62830324 | 62830524 |
| 1 | 62749891 | 62865267 + | NM_010939    | Nrp2     | -3152  | 62746539 | 62746739 |
| 1 | 63161045 | 63204870 + | NR_045915    | Ino80dos | 37594  | 63198639 | 63198839 |
| 1 | 63161314 | 63204870 + | NR_045914    | Ino80dos | 37325  | 63198639 | 63198839 |
| 1 | 63190166 | 63223397 - | NM_001160038 | Ndufs1   | 24558  | 63198639 | 63198839 |
| 1 | 63190166 | 63223397 - | NM_001160039 | Ndufs1   | 24558  | 63198639 | 63198839 |
| 1 | 63190166 | 63223397 - | NM_001160040 | Ndufs1   | 24558  | 63198639 | 63198839 |

|   |          |            |              |               |        |          |          |
|---|----------|------------|--------------|---------------|--------|----------|----------|
| 1 | 63190166 | 63223397 - | NM_145518    | Ndufs1        | 24558  | 63198639 | 63198839 |
| 1 | 64082247 | 64167964 - | NM_033563    | Klf7          | 15837  | 64151927 | 64152127 |
| 1 | 64777132 | 64784325 - | NM_001042659 | Fzd5          | -5397  | 64789722 | 64789922 |
| 1 | 64777132 | 64784325 - | NM_022721    | Fzd5          | -5397  | 64789722 | 64789922 |
| 1 | 64835695 | 65003399 - | NM_001039493 | Plekhn3       | -14    | 65003413 | 65003613 |
| 1 | 64835695 | 65003399 - | NM_001039493 | Plekhn3       | 158903 | 64844296 | 64844496 |
| 1 | 64835695 | 65003399 - | NM_001039493 | Plekhn3       | 14186  | 64989013 | 64989213 |
| 1 | 64835695 | 65003399 - | NM_001039493 | Plekhn3       | 14776  | 64988423 | 64988623 |
| 1 | 65205190 | 65233054 - | NM_001111320 | Idh1          | 10559  | 65222295 | 65222495 |
| 1 | 65205190 | 65233054 - | NM_001111320 | Idh1          | 8559   | 65224295 | 65224495 |
| 1 | 65205190 | 65225717 - | NM_010497    | Idh1          | 3222   | 65222295 | 65222495 |
| 1 | 65205190 | 65225717 - | NM_010497    | Idh1          | 1222   | 65224295 | 65224495 |
| 1 | 65233259 | 65325271 + | NM_001310624 | Pikfyve       | -8764  | 65224295 | 65224495 |
| 1 | 65233259 | 65325271 + | NM_011086    | Pikfyve       | -8764  | 65224295 | 65224495 |
| 1 | 66747405 | 66766380 + | NM_001310642 | Rpe           | 398    | 66747803 | 66748003 |
| 1 | 66747405 | 66766380 + | NM_001310643 | Rpe           | 398    | 66747803 | 66748003 |
| 1 | 66747405 | 66766380 + | NM_001310644 | Rpe           | 398    | 66747803 | 66748003 |
| 1 | 66747405 | 66766380 + | NM_025683    | Rpe           | 398    | 66747803 | 66748003 |
| 1 | 66765817 | 66864170 - | NM_001122738 | Kansl1l       | 59550  | 66804420 | 66804620 |
| 1 | 66765817 | 66864170 - | NM_177645    | Kansl1l       | 59550  | 66804420 | 66804620 |
| 1 | 66877413 | 66909884 - | NM_007381    | Acadl         | -3132  | 66913016 | 66913216 |
| 1 | 67169601 | 67277842 + | NM_001080809 | Cps1          | -7771  | 67161630 | 67161830 |
| 1 | 68078761 | 69154634 - | NM_010154    | Erb4          | 546751 | 68607683 | 68607883 |
| 1 | 71074109 | 71149547 - | NM_007525    | Bard1         | 66068  | 71083279 | 71083479 |
| 1 | 71603730 | 71625978 + | NM_026195    | Atic          | -1201  | 71602329 | 71602529 |
| 1 | 72205807 | 72258882 - | NM_001005423 | Mreg          | 37765  | 72220917 | 72221117 |
| 1 | 72205807 | 72258882 - | NM_001005423 | Mreg          | 38676  | 72220006 | 72220206 |
| 1 | 72305747 | 72330889 - | NM_023523    | Pecr          | -8491  | 72339380 | 72339580 |
| 1 | 72330947 | 72349570 + | NM_175564    | Tmem169       | 8433   | 72339380 | 72339580 |
| 1 | 73664955 | 73911041 - | NR_045311    | 6030407O03Rik | 207112 | 73703729 | 73703929 |

|   |          |            |              |         |        |          |          |
|---|----------|------------|--------------|---------|--------|----------|----------|
| 1 | 74238360 | 74241206 - | NM_178241    | Cxcr1   | -4395  | 74245601 | 74245801 |
| 1 | 74331608 | 74400267 + | NM_001039509 | Pnkd    | 22235  | 74353843 | 74354043 |
| 1 | 74331608 | 74400267 + | NM_001039509 | Pnkd    | 45076  | 74376684 | 74376884 |
| 1 | 74331608 | 74400267 + | NM_001039509 | Pnkd    | 12075  | 74343683 | 74343883 |
| 1 | 74331608 | 74400267 + | NM_001039509 | Pnkd    | 14567  | 74346175 | 74346375 |
| 1 | 74334821 | 74350911 - | NM_027154    | Tmbim1  | -2932  | 74353843 | 74354043 |
| 1 | 74334821 | 74350911 - | NM_027154    | Tmbim1  | 7028   | 74343683 | 74343883 |
| 1 | 74334821 | 74350911 - | NM_027154    | Tmbim1  | 4536   | 74346175 | 74346375 |
| 1 | 74379184 | 74400267 + | NM_019999    | Pnkd    | -2300  | 74376684 | 74376884 |
| 1 | 74455958 | 74482135 + | NM_009509    | Vil1    | 4390   | 74460348 | 74460548 |
| 1 | 74455958 | 74482135 + | NM_009509    | Vil1    | 23856  | 74479814 | 74480014 |
| 1 | 74455958 | 74482135 + | NM_009509    | Vil1    | 5599   | 74461557 | 74461757 |
| 1 | 74455958 | 74482135 + | NM_009509    | Vil1    | -2893  | 74452865 | 74453065 |
| 1 | 74455958 | 74482135 + | NM_009509    | Vil1    | 3883   | 74459841 | 74460041 |
| 1 | 74455958 | 74482135 + | NM_009509    | Vil1    | 2499   | 74458457 | 74458657 |
| 1 | 74455958 | 74482135 + | NM_009509    | Vil1    | -4510  | 74451248 | 74451448 |
| 1 | 74482084 | 74552396 - | NM_001310662 | Usp37   | -8427  | 74560823 | 74561023 |
| 1 | 74482084 | 74590861 - | NM_176972    | Usp37   | 29838  | 74560823 | 74561023 |
| 1 | 74552634 | 74577417 + | NM_021383    | Rqcd1   | 8189   | 74560823 | 74561023 |
| 1 | 74760148 | 74784465 + | NM_024264    | Cyp27a1 | 12611  | 74772759 | 74772959 |
| 1 | 74760148 | 74784465 + | NM_024264    | Cyp27a1 | 13259  | 74773407 | 74773607 |
| 1 | 74785496 | 74795530 - | NM_153744    | Prkag3  | -4760  | 74800290 | 74800490 |
| 1 | 74901603 | 74904307 + | NM_009872    | Cdk5r2  | -202   | 74901201 | 74901401 |
| 1 | 74948654 | 74982174 - | NM_001039495 | Ccdc108 | -6114  | 74988288 | 74988488 |
| 1 | 74991892 | 74998226 - | NM_010544    | Ihh     | 1784   | 74996242 | 74996442 |
| 1 | 75013920 | 75121801 - | NM_029342    | Nhej1   | 104464 | 75017137 | 75017337 |
| 1 | 75013920 | 75121801 - | NM_029342    | Nhej1   | 103458 | 75018143 | 75018343 |
| 1 | 75013920 | 75121801 - | NM_029342    | Nhej1   | 106927 | 75014674 | 75014874 |
| 1 | 75177435 | 75188585 - | NM_001003917 | Atg9a   | -8927  | 75197512 | 75197712 |
| 1 | 75177435 | 75188585 - | NM_001288612 | Atg9a   | -8927  | 75197512 | 75197712 |

|   |          |            |              |         |        |          |          |
|---|----------|------------|--------------|---------|--------|----------|----------|
| 1 | 75177435 | 75188585 - | NM_001288613 | Atg9a   | -8927  | 75197512 | 75197712 |
| 1 | 75177435 | 75188585 - | NR_109938    | Atg9a   | -8927  | 75197512 | 75197712 |
| 1 | 75194810 | 75207354 - | NM_029010    | Glb1l   | 9642   | 75197512 | 75197712 |
| 1 | 75207404 | 75212182 + | NM_001277992 | Stk16   | -9692  | 75197512 | 75197712 |
| 1 | 75207404 | 75212182 + | NM_011494    | Stk16   | -9692  | 75197512 | 75197712 |
| 1 | 75207404 | 75212182 + | NR_102731    | Stk16   | -9692  | 75197512 | 75197712 |
| 1 | 75447085 | 75470916 + | NM_183022    | Asic4   | -4509  | 75442376 | 75442576 |
| 1 | 77363760 | 77511664 - | NM_007936    | Epha4   | 52583  | 77458881 | 77459081 |
| 1 | 78097842 | 78193712 - | NM_001159520 | Pax3    | -5736  | 78199448 | 78199648 |
| 1 | 78097842 | 78193712 - | NM_008781    | Pax3    | -5736  | 78199448 | 78199648 |
| 1 | 78306921 | 78416862 + | NM_001004173 | Sgpp2   | 14046  | 78320967 | 78321167 |
| 1 | 78306921 | 78416862 + | NM_001004173 | Sgpp2   | 89608  | 78396529 | 78396729 |
| 1 | 78306921 | 78416862 + | NM_001004173 | Sgpp2   | 12132  | 78319053 | 78319253 |
| 1 | 78654400 | 78704319 + | NM_001033606 | Acsl3   | 44930  | 78699330 | 78699530 |
| 1 | 78654400 | 78704319 + | NM_001136222 | Acsl3   | 44930  | 78699330 | 78699530 |
| 1 | 78654400 | 78704319 + | NM_028817    | Acsl3   | 44930  | 78699330 | 78699530 |
| 1 | 79603451 | 79668548 - | NM_183027    | Ap1s3   | 30257  | 79638091 | 79638291 |
| 1 | 80263393 | 80337006 - | NM_016716    | Cul3    | 864    | 80335942 | 80336142 |
| 1 | 82313154 | 82441942 + | NM_029777    | Rhbdd1  | 112677 | 82425831 | 82426031 |
| 1 | 82335624 | 82441942 + | NM_001122685 | Rhbdd1  | 90207  | 82425831 | 82426031 |
| 1 | 82753224 | 82765032 - | NM_025453    | Tm4sf20 | 3883   | 82760949 | 82761149 |
| 1 | 82753224 | 82765032 - | NM_025453    | Tm4sf20 | 1537   | 82763295 | 82763495 |
| 1 | 82753224 | 82765032 - | NM_025453    | Tm4sf20 | 4287   | 82760545 | 82760745 |
| 1 | 83009098 | 83035024 - | NM_030556    | Slc19a3 | 7226   | 83027598 | 83027798 |
| 1 | 83009098 | 83035024 - | NM_030556    | Slc19a3 | 1351   | 83033473 | 83033673 |
| 1 | 83009098 | 83035024 - | NM_030556    | Slc19a3 | 5654   | 83029170 | 83029370 |
| 1 | 83009098 | 83035024 - | NM_030556    | Slc19a3 | 17318  | 83017506 | 83017706 |
| 1 | 83113341 | 83115743 + | NM_001159738 | Ccl20   | 563    | 83113904 | 83114104 |
| 1 | 83113341 | 83115743 + | NM_016960    | Ccl20   | 563    | 83113904 | 83114104 |
| 1 | 84032868 | 84281221 - | NM_001003948 | Pid1    | -5634  | 84286855 | 84287055 |

|   |          |            |              |               |       |          |          |
|---|----------|------------|--------------|---------------|-------|----------|----------|
| 1 | 85084714 | 85106429 - | NM_213615    | A530032D15Rik | 18680 | 85087549 | 85087749 |
| 1 | 85084714 | 85106429 - | NM_213615    | A530032D15Rik | 3522  | 85102707 | 85102907 |
| 1 | 85242919 | 85267142 - | NM_001037909 | C130026I21Rik | -7193 | 85274335 | 85274535 |
| 1 | 85242919 | 85267142 - | NM_001037909 | C130026I21Rik | -9893 | 85277035 | 85277235 |
| 1 | 85242919 | 85267142 - | NM_001037909 | C130026I21Rik | 14760 | 85252182 | 85252382 |
| 1 | 85242919 | 85267142 - | NM_001037909 | C130026I21Rik | 8454  | 85258488 | 85258688 |
| 1 | 85242919 | 85267142 - | NM_001037909 | C130026I21Rik | 13298 | 85253644 | 85253844 |
| 1 | 85242919 | 85267142 - | NM_001037909 | C130026I21Rik | 24084 | 85242858 | 85243058 |
| 1 | 85242919 | 85267142 - | NM_001037909 | C130026I21Rik | 19746 | 85247196 | 85247396 |
| 1 | 85242919 | 85267142 - | NM_175219    | C130026I21Rik | -7193 | 85274335 | 85274535 |
| 1 | 85242919 | 85267142 - | NM_175219    | C130026I21Rik | -9893 | 85277035 | 85277235 |
| 1 | 85242919 | 85267142 - | NM_175219    | C130026I21Rik | 14760 | 85252182 | 85252382 |
| 1 | 85242919 | 85267142 - | NM_175219    | C130026I21Rik | 8454  | 85258488 | 85258688 |
| 1 | 85242919 | 85267142 - | NM_175219    | C130026I21Rik | 13298 | 85253644 | 85253844 |
| 1 | 85242919 | 85267142 - | NM_175219    | C130026I21Rik | 24084 | 85242858 | 85243058 |
| 1 | 85242919 | 85267142 - | NM_175219    | C130026I21Rik | 19746 | 85247196 | 85247396 |
| 1 | 87473475 | 87495386 - | NM_030194    | Sp110         | 9914  | 87485272 | 87485472 |
| 1 | 87473475 | 87495386 - | NM_030194    | Sp110         | 6307  | 87488879 | 87489079 |
| 1 | 87473475 | 87495386 - | NM_030194    | Sp110         | -5311 | 87500697 | 87500897 |
| 1 | 87473475 | 87495386 - | NM_030194    | Sp110         | 6838  | 87488348 | 87488548 |
| 1 | 87473475 | 87495386 - | NM_030194    | Sp110         | 14418 | 87480768 | 87480968 |
| 1 | 87473475 | 87500467 - | NM_175397    | Sp110         | 14995 | 87485272 | 87485472 |
| 1 | 87473475 | 87500467 - | NM_175397    | Sp110         | 11388 | 87488879 | 87489079 |
| 1 | 87473475 | 87500467 - | NM_175397    | Sp110         | -230  | 87500697 | 87500897 |
| 1 | 87473475 | 87500467 - | NM_175397    | Sp110         | 11919 | 87488348 | 87488548 |
| 1 | 87473475 | 87500467 - | NM_175397    | Sp110         | 19499 | 87480768 | 87480968 |
| 1 | 87497278 | 87541612 + | NM_001013817 | Sp140         | -8199 | 87488879 | 87489079 |
| 1 | 87497278 | 87541612 + | NM_001013817 | Sp140         | 3419  | 87500697 | 87500897 |
| 1 | 87497278 | 87541612 + | NM_001013817 | Sp140         | -8730 | 87488348 | 87488548 |
| 1 | 87546625 | 87606024 + | NM_013673    | Sp100         | 46735 | 87593360 | 87593560 |

|   |          |            |              |        |       |          |          |
|---|----------|------------|--------------|--------|-------|----------|----------|
| 1 | 87690022 | 87748153 + | NM_133781    | Cab39  | 13283 | 87703305 | 87703505 |
| 1 | 87690022 | 87748153 + | NM_133781    | Cab39  | 719   | 87690741 | 87690941 |
| 1 | 87690022 | 87748153 + | NM_133781    | Cab39  | 1845  | 87691867 | 87692067 |
| 1 | 87690022 | 87748153 + | NM_133781    | Cab39  | -3030 | 87686792 | 87686992 |
| 1 | 87836112 | 87857631 - | NM_001033290 | Gpr55  | 11492 | 87845939 | 87846139 |
| 1 | 87836112 | 87857631 - | NM_001033290 | Gpr55  | 11987 | 87845444 | 87845644 |
| 1 | 88051355 | 88174860 + | NM_001310702 | Armc9  | 28924 | 88080279 | 88080479 |
| 1 | 88051355 | 88174860 + | NM_001310702 | Armc9  | 53863 | 88105218 | 88105418 |
| 1 | 88051355 | 88149067 + | NM_027456    | Armc9  | 28924 | 88080279 | 88080479 |
| 1 | 88051355 | 88149067 + | NM_027456    | Armc9  | 53863 | 88105218 | 88105418 |
| 1 | 88051355 | 88174860 + | NM_030184    | Armc9  | 28924 | 88080279 | 88080479 |
| 1 | 88051355 | 88174860 + | NM_030184    | Armc9  | 53863 | 88105218 | 88105418 |
| 1 | 88439590 | 88479077 - | NM_008801    | Pde6d  | 19523 | 88459354 | 88459554 |
| 1 | 88562868 | 88567149 - | NM_010933    | Nppc   | 940   | 88566009 | 88566209 |
| 1 | 88600379 | 88946673 + | NM_001172157 | Dis3l2 | 50749 | 88651128 | 88651328 |
| 1 | 88600379 | 88946673 + | NM_153530    | Dis3l2 | 50749 | 88651128 | 88651328 |
| 1 | 88994577 | 88998182 - | NM_001081082 | Alpi   | -688  | 88998870 | 88999070 |
| 1 | 89223573 | 89347386 + | NM_001110212 | Gigyf2 | 59801 | 89283374 | 89283574 |
| 1 | 89223573 | 89347386 + | NM_001110212 | Gigyf2 | 68025 | 89291598 | 89291798 |
| 1 | 89223573 | 89347386 + | NM_001110212 | Gigyf2 | -9689 | 89213684 | 89213884 |
| 1 | 89223573 | 89347386 + | NM_001110212 | Gigyf2 | 59030 | 89282603 | 89282803 |
| 1 | 89223573 | 89347386 + | NM_001110212 | Gigyf2 | 20088 | 89243661 | 89243861 |
| 1 | 89223573 | 89347386 + | NM_146112    | Gigyf2 | 59801 | 89283374 | 89283574 |
| 1 | 89223573 | 89347386 + | NM_146112    | Gigyf2 | 68025 | 89291598 | 89291798 |
| 1 | 89223573 | 89347386 + | NM_146112    | Gigyf2 | -9689 | 89213684 | 89213884 |
| 1 | 89223573 | 89347386 + | NM_146112    | Gigyf2 | 59030 | 89282603 | 89282803 |
| 1 | 89223573 | 89347386 + | NM_146112    | Gigyf2 | 20088 | 89243661 | 89243861 |
| 1 | 89282859 | 89291305 - | NM_001110227 | Kcnj13 | 7731  | 89283374 | 89283574 |
| 1 | 89282859 | 89291305 - | NM_001110227 | Kcnj13 | -293  | 89291598 | 89291798 |
| 1 | 89373404 | 89470446 - | NM_001111314 | Ngef   | 31869 | 89438377 | 89438577 |

|   |          |            |              |         |        |          |          |
|---|----------|------------|--------------|---------|--------|----------|----------|
| 1 | 89373404 | 89470446 - | NM_001111314 | Ngef    | 22041  | 89448205 | 89448405 |
| 1 | 89749862 | 89841065 + | NM_177646    | Dgkd    | 56898  | 89806760 | 89806960 |
| 1 | 89749862 | 89841065 + | NM_177646    | Dgkd    | 48965  | 89798827 | 89799027 |
| 1 | 89749862 | 89841065 + | NM_177646    | Dgkd    | 53509  | 89803371 | 89803571 |
| 1 | 89749862 | 89841065 + | NM_177646    | Dgkd    | 46452  | 89796314 | 89796514 |
| 1 | 89841696 | 89905127 - | NM_001033291 | Usp40   | -5376  | 89910503 | 89910703 |
| 1 | 89841696 | 89905127 - | NM_001198573 | Usp40   | -5376  | 89910503 | 89910703 |
| 1 | 89951986 | 90116578 + | NM_201641    | Ugt1a10 | 140428 | 90092414 | 90092614 |
| 1 | 89951986 | 90116578 + | NM_201641    | Ugt1a10 | 158521 | 90110507 | 90110707 |
| 1 | 89951986 | 90116578 + | NM_201641    | Ugt1a10 | 151734 | 90103720 | 90103920 |
| 1 | 89951986 | 90116578 + | NM_201641    | Ugt1a10 | 20720  | 89972706 | 89972906 |
| 1 | 89951986 | 90116578 + | NM_201641    | Ugt1a10 | 64093  | 90016079 | 90016279 |
| 1 | 89951986 | 90116578 + | NM_201641    | Ugt1a10 | 87969  | 90039955 | 90040155 |
| 1 | 89951986 | 90116578 + | NM_201641    | Ugt1a10 | 30877  | 89982863 | 89983063 |
| 1 | 89951986 | 90116578 + | NM_201641    | Ugt1a10 | -879   | 89950907 | 89951107 |
| 1 | 89951986 | 90116578 + | NM_201641    | Ugt1a10 | 14207  | 89966193 | 89966393 |
| 1 | 89967354 | 90116578 + | NM_201644    | Ugt1a9  | 125060 | 90092414 | 90092614 |
| 1 | 89967354 | 90116578 + | NM_201644    | Ugt1a9  | 143153 | 90110507 | 90110707 |
| 1 | 89967354 | 90116578 + | NM_201644    | Ugt1a9  | 136366 | 90103720 | 90103920 |
| 1 | 89967354 | 90116578 + | NM_201644    | Ugt1a9  | 5352   | 89972706 | 89972906 |
| 1 | 89967354 | 90116578 + | NM_201644    | Ugt1a9  | 48725  | 90016079 | 90016279 |
| 1 | 89967354 | 90116578 + | NM_201644    | Ugt1a9  | 72601  | 90039955 | 90040155 |
| 1 | 89967354 | 90116578 + | NM_201644    | Ugt1a9  | 15509  | 89982863 | 89983063 |
| 1 | 89967354 | 90116578 + | NM_201644    | Ugt1a9  | -961   | 89966193 | 89966393 |
| 1 | 89991576 | 90116578 + | NM_201642    | Ugt1a7c | 100838 | 90092414 | 90092614 |
| 1 | 89991576 | 90116578 + | NM_201642    | Ugt1a7c | 118931 | 90110507 | 90110707 |
| 1 | 89991576 | 90116578 + | NM_201642    | Ugt1a7c | 112144 | 90103720 | 90103920 |
| 1 | 89991576 | 90116578 + | NM_201642    | Ugt1a7c | 24503  | 90016079 | 90016279 |
| 1 | 89991576 | 90116578 + | NM_201642    | Ugt1a7c | 48379  | 90039955 | 90040155 |
| 1 | 89991576 | 90116578 + | NM_201642    | Ugt1a7c | -8513  | 89982863 | 89983063 |

|   |          |            |              |               |        |          |          |
|---|----------|------------|--------------|---------------|--------|----------|----------|
| 1 | 89999832 | 90115574 + | NM_201410    | Ugt1a6b       | 92582  | 90092414 | 90092614 |
| 1 | 89999832 | 90115574 + | NM_201410    | Ugt1a6b       | 110675 | 90110507 | 90110707 |
| 1 | 89999832 | 90115574 + | NM_201410    | Ugt1a6b       | 103888 | 90103720 | 90103920 |
| 1 | 89999832 | 90115574 + | NM_201410    | Ugt1a6b       | 16247  | 90016079 | 90016279 |
| 1 | 89999832 | 90115574 + | NM_201410    | Ugt1a6b       | 40123  | 90039955 | 90040155 |
| 1 | 90031384 | 90116578 + | NM_145079    | Ugt1a6a       | 61030  | 90092414 | 90092614 |
| 1 | 90031384 | 90116578 + | NM_145079    | Ugt1a6a       | 79123  | 90110507 | 90110707 |
| 1 | 90031384 | 90116578 + | NM_145079    | Ugt1a6a       | 72336  | 90103720 | 90103920 |
| 1 | 90031384 | 90116578 + | NM_145079    | Ugt1a6a       | 8571   | 90039955 | 90040155 |
| 1 | 90062587 | 90116578 + | NM_201643    | Ugt1a5        | 29827  | 90092414 | 90092614 |
| 1 | 90062587 | 90116578 + | NM_201643    | Ugt1a5        | 47920  | 90110507 | 90110707 |
| 1 | 90062587 | 90116578 + | NM_201643    | Ugt1a5        | 41133  | 90103720 | 90103920 |
| 1 | 90097186 | 90116578 + | NM_013701    | Ugt1a2        | -4572  | 90092414 | 90092614 |
| 1 | 90097186 | 90116578 + | NM_013701    | Ugt1a2        | 13321  | 90110507 | 90110707 |
| 1 | 90097186 | 90116578 + | NM_013701    | Ugt1a2        | 6534   | 90103720 | 90103920 |
| 1 | 90101307 | 90102324 - | NM_008299    | Dnajb3        | -8183  | 90110507 | 90110707 |
| 1 | 90101307 | 90102324 - | NM_008299    | Dnajb3        | -1396  | 90103720 | 90103920 |
| 1 | 90108534 | 90116578 + | NM_201645    | Ugt1a1        | 1973   | 90110507 | 90110707 |
| 1 | 90108534 | 90116578 + | NM_201645    | Ugt1a1        | -4614  | 90103720 | 90103920 |
| 1 | 90123595 | 90158865 + | NM_001281466 | Mroh2a        | -6368  | 90117027 | 90117227 |
| 1 | 90155431 | 90174155 - | NM_198652    | Hjurp         | -288   | 90174443 | 90174643 |
| 1 | 90155431 | 90174155 - | NM_198652    | Hjurp         | -6695  | 90180850 | 90181050 |
| 1 | 90155431 | 90174155 - | NM_198652    | Hjurp         | -7249  | 90181404 | 90181604 |
| 1 | 90155431 | 90174155 - | NM_198652    | Hjurp         | -2260  | 90176415 | 90176615 |
| 1 | 90159688 | 90165984 - | NR_040291    | 6430706D22Rik | -8459  | 90174443 | 90174643 |
| 1 | 90161403 | 90174133 - | NM_172505    | A730008H23Rik | -310   | 90174443 | 90174643 |
| 1 | 90161403 | 90174133 - | NM_172505    | A730008H23Rik | -6717  | 90180850 | 90181050 |
| 1 | 90161403 | 90174133 - | NM_172505    | A730008H23Rik | -7271  | 90181404 | 90181604 |
| 1 | 90161403 | 90174133 - | NM_172505    | A730008H23Rik | -2282  | 90176415 | 90176615 |
| 1 | 90967037 | 91050369 + | NM_133816    | Sh3bp4        | 4313   | 90971350 | 90971550 |



|   |          |            |              |               |        |          |          |
|---|----------|------------|--------------|---------------|--------|----------|----------|
| 1 | 90967037 | 91050369 + | NM_133816    | Sh3bp4        | 55319  | 91022356 | 91022556 |
| 1 | 91351386 | 91791858 + | NM_001037136 | Agap1         | 132358 | 91483744 | 91483944 |
| 1 | 91351386 | 91791858 + | NM_001037136 | Agap1         | 1571   | 91352957 | 91353157 |
| 1 | 91351386 | 91791858 + | NM_178119    | Agap1         | 132358 | 91483744 | 91483944 |
| 1 | 91351386 | 91791858 + | NM_178119    | Agap1         | 1571   | 91352957 | 91353157 |
| 1 | 92895304 | 93025522 + | NM_001111312 | Lrrfip1       | 42952  | 92938256 | 92938456 |
| 1 | 92895304 | 93025522 + | NM_001111312 | Lrrfip1       | 67423  | 92962727 | 92962927 |
| 1 | 92950021 | 93013900 + | NM_001111311 | Lrrfip1       | 12706  | 92962727 | 92962927 |
| 1 | 92950021 | 93025522 + | NM_001310732 | Lrrfip1       | 12706  | 92962727 | 92962927 |
| 1 | 92950021 | 93025522 + | NM_008515    | Lrrfip1       | 12706  | 92962727 | 92962927 |
| 1 | 93146896 | 93182603 + | NM_026454    | Ube2f         | -1765  | 93144931 | 93145131 |
| 1 | 93312559 | 93355906 - | NM_011066    | Per2          | 13005  | 93342701 | 93342901 |
| 1 | 93312559 | 93355906 - | NM_011066    | Per2          | 1326   | 93354380 | 93354580 |
| 1 | 93312559 | 93355906 - | NM_011066    | Per2          | 10079  | 93345627 | 93345827 |
| 1 | 93437142 | 93456168 + | NM_001039126 | Asb1          | 0      | 93437105 | 93437305 |
| 1 | 93437657 | 93456168 + | NM_023046    | Asb1          | -352   | 93437105 | 93437305 |
| 1 | 93829332 | 94044971 - | NM_207225    | Hdac4         | 64069  | 93980702 | 93980902 |
| 1 | 94336296 | 94370336 - | NM_024197    | Ndufa10       | 19484  | 94350652 | 94350852 |
| 1 | 94830120 | 94847168 - | NR_015525    | 9430060I03Rik | 12531  | 94834437 | 94834637 |
| 1 | 94830985 | 94844526 + | NM_011796    | Capn10        | 3452   | 94834437 | 94834637 |
| 1 | 95047932 | 95057448 - | NM_001159940 | 2310007B03Rik | -4480  | 95061928 | 95062128 |
| 1 | 95047932 | 95057526 - | NM_172411    | 2310007B03Rik | -4402  | 95061928 | 95062128 |
| 1 | 95065000 | 95127644 + | NM_001310428 | Crocc2        | -2872  | 95061928 | 95062128 |
| 1 | 95302517 | 95342279 - | NM_001301364 | Hdlbp         | 6041   | 95336038 | 95336238 |
| 1 | 95302517 | 95375495 - | NM_133808    | Hdlbp         | 15135  | 95360160 | 95360360 |
| 1 | 95302517 | 95375495 - | NM_133808    | Hdlbp         | 39257  | 95336038 | 95336238 |
| 1 | 95408681 | 95518554 + | NM_145519    | Farp2         | 107266 | 95515947 | 95516147 |
| 1 | 95408681 | 95518554 + | NM_145519    | Farp2         | 55734  | 95464415 | 95464615 |
| 1 | 95517328 | 95532305 - | NM_021537    | Stk25         | -6319  | 95538624 | 95538824 |
| 1 | 95582271 | 95592340 + | NM_016778    | Bok           | 7176   | 95589447 | 95589647 |

|   |           |             |              |               |        |           |           |
|---|-----------|-------------|--------------|---------------|--------|-----------|-----------|
| 1 | 99602620  | 99666670 -  | NM_173760    | Ppip5k2       | 628    | 99665842  | 99666042  |
| 1 | 99666749  | 99690286 +  | NM_001310773 | Gin1          | -707   | 99665842  | 99666042  |
| 1 | 99666749  | 99690286 +  | NM_026250    | Gin1          | -707   | 99665842  | 99666042  |
| 1 | 99717671  | 99992210 -  | NM_013626    | Pam           | 2861   | 99989149  | 99989349  |
| 1 | 99717671  | 99992210 -  | NM_013626    | Pam           | -1097  | 99993307  | 99993507  |
| 1 | 99717671  | 99992210 -  | NM_013626    | Pam           | -252   | 99992462  | 99992662  |
| 1 | 99717671  | 99992210 -  | NM_013626    | Pam           | 219028 | 99772982  | 99773182  |
| 1 | 99717671  | 99992210 -  | NM_013626    | Pam           | 58316  | 99933694  | 99933894  |
| 1 | 99717671  | 99992210 -  | NM_013626    | Pam           | 65977  | 99926033  | 99926233  |
| 1 | 99927700  | 99944371 -  | NR_037993    | B230216N24Rik | 10477  | 99933694  | 99933894  |
| 1 | 107414999 | 107560254 - | NM_013784    | Pign          | -3631  | 107563885 | 107564085 |
| 1 | 107560438 | 107651709 + | NM_029349    | 2310035C23Rik | 3447   | 107563885 | 107564085 |
| 1 | 107560438 | 107651709 + | NM_029349    | 2310035C23Rik | 30354  | 107590792 | 107590992 |
| 1 | 107560438 | 107651709 + | NM_173187    | 2310035C23Rik | 3447   | 107563885 | 107564085 |
| 1 | 107560438 | 107651709 + | NM_173187    | 2310035C23Rik | 30354  | 107590792 | 107590992 |
| 1 | 108049202 | 108068102 - | NR_040630    | Gm20753       | -5079  | 108073181 | 108073381 |
| 1 | 108068446 | 108290823 + | NM_133821    | Phlpp1        | 4735   | 108073181 | 108073381 |
| 1 | 108434755 | 108610868 - | NM_009741    | Bcl2          | 127228 | 108483440 | 108483640 |
| 1 | 108616987 | 108656320 - | NM_027534    | Kdsr          | 21372  | 108634748 | 108634948 |
| 1 | 108616987 | 108656320 - | NM_027534    | Kdsr          | 2964   | 108653156 | 108653356 |
| 1 | 120195095 | 120207710 - | NM_011650    | Tsn           | -218   | 120207928 | 120208128 |
| 1 | 120285635 | 120506040 + | NM_001293300 | Clasp1        | 62020  | 120347655 | 120347855 |
| 1 | 120285635 | 120506040 + | NM_001293300 | Clasp1        | 206530 | 120492165 | 120492365 |
| 1 | 120285635 | 120506040 + | NM_001293300 | Clasp1        | 88052  | 120373687 | 120373887 |
| 1 | 120285635 | 120506040 + | NM_001293300 | Clasp1        | 39691  | 120325326 | 120325526 |
| 1 | 120285635 | 120506040 + | NM_001293301 | Clasp1        | 62020  | 120347655 | 120347855 |
| 1 | 120285635 | 120506040 + | NM_001293301 | Clasp1        | 206530 | 120492165 | 120492365 |
| 1 | 120285635 | 120506040 + | NM_001293301 | Clasp1        | 88052  | 120373687 | 120373887 |
| 1 | 120285635 | 120506040 + | NM_001293301 | Clasp1        | 39691  | 120325326 | 120325526 |
| 1 | 120285635 | 120506040 + | NM_029709    | Clasp1        | 62020  | 120347655 | 120347855 |

|   |           |             |              |               |        |           |           |
|---|-----------|-------------|--------------|---------------|--------|-----------|-----------|
| 1 | 120285635 | 120506040 + | NM_029709    | Clasp1        | 206530 | 120492165 | 120492365 |
| 1 | 120285635 | 120506040 + | NM_029709    | Clasp1        | 88052  | 120373687 | 120373887 |
| 1 | 120285635 | 120506040 + | NM_029709    | Clasp1        | 39691  | 120325326 | 120325526 |
| 1 | 120730638 | 120950197 - | NM_001081125 | Gli2          | 4422   | 120945575 | 120945775 |
| 1 | 120730638 | 120950197 - | NM_001081125 | Gli2          | 94472  | 120855525 | 120855725 |
| 1 | 121366882 | 121401360 - | NM_022327    | Ralb          | 12538  | 121388622 | 121388822 |
| 1 | 121422731 | 121425561 + | NM_146103    | Tmem185b      | -2990  | 121419541 | 121419741 |
| 1 | 121441610 | 121545578 - | NM_145506    | Epb4.1I5      | 99409  | 121445969 | 121446169 |
| 1 | 121441610 | 121545578 - | NM_145506    | Epb4.1I5      | 7299   | 121538079 | 121538279 |
| 1 | 121441610 | 121545578 - | NM_145506    | Epb4.1I5      | 18333  | 121527045 | 121527245 |
| 1 | 121491401 | 121545578 - | NM_001113416 | Epb4.1I5      | 7299   | 121538079 | 121538279 |
| 1 | 121491401 | 121545578 - | NM_001113416 | Epb4.1I5      | 18333  | 121527045 | 121527245 |
| 1 | 121554670 | 121733649 - | NM_019933    | Ptpn4         | 129997 | 121603452 | 121603652 |
| 1 | 121963954 | 121970358 - | NM_019432    | Tmem37        | 686    | 121969472 | 121969672 |
| 1 | 122009857 | 122017497 - | NM_001037999 | Dbi           | -5582  | 122023079 | 122023279 |
| 1 | 122009857 | 122017497 - | NM_001037999 | Dbi           | 979    | 122016318 | 122016518 |
| 1 | 122009857 | 122017497 - | NM_001037999 | Dbi           | -4261  | 122021758 | 122021958 |
| 1 | 122009857 | 122017674 - | NM_007830    | Dbi           | -5405  | 122023079 | 122023279 |
| 1 | 122009857 | 122017674 - | NM_007830    | Dbi           | 1156   | 122016318 | 122016518 |
| 1 | 122009857 | 122017674 - | NM_007830    | Dbi           | -4084  | 122021758 | 122021958 |
| 1 | 122017764 | 122084767 + | NM_001172074 | 3110009E18Rik | 5315   | 122023079 | 122023279 |
| 1 | 122017764 | 122084767 + | NM_001172074 | 3110009E18Rik | 19141  | 122036905 | 122037105 |
| 1 | 122017764 | 122084767 + | NM_001172074 | 3110009E18Rik | -1246  | 122016318 | 122016518 |
| 1 | 122017764 | 122084767 + | NM_001172074 | 3110009E18Rik | 3994   | 122021758 | 122021958 |
| 1 | 122017764 | 122084767 + | NM_028439    | 3110009E18Rik | 5315   | 122023079 | 122023279 |
| 1 | 122017764 | 122084767 + | NM_028439    | 3110009E18Rik | 19141  | 122036905 | 122037105 |
| 1 | 122017764 | 122084767 + | NM_028439    | 3110009E18Rik | -1246  | 122016318 | 122016518 |
| 1 | 122017764 | 122084767 + | NM_028439    | 3110009E18Rik | 3994   | 122021758 | 122021958 |
| 1 | 125228715 | 125942137 - | NM_199021    | Dpp10         | 644777 | 125297160 | 125297360 |
| 1 | 127573573 | 127770439 + | NM_027677    | Gpr39         | 85454  | 127659027 | 127659227 |

|   |           |             |              |        |        |           |           |
|---|-----------|-------------|--------------|--------|--------|-----------|-----------|
| 1 | 127573573 | 127770439 + | NM_027677    | Gpr39  | 41090  | 127614663 | 127614863 |
| 1 | 127573573 | 127770439 + | NM_027677    | Gpr39  | 60854  | 127634427 | 127634627 |
| 1 | 127573573 | 127770439 + | NM_027677    | Gpr39  | 1437   | 127575010 | 127575210 |
| 1 | 127810213 | 128727210 - | NM_001081756 | Nckap5 | 78026  | 128648984 | 128649184 |
| 1 | 127810213 | 128727210 - | NM_001081756 | Nckap5 | 179503 | 128547507 | 128547707 |
| 1 | 127810213 | 128727210 - | NM_001081756 | Nckap5 | 157284 | 128569726 | 128569926 |
| 1 | 127810213 | 128727210 - | NM_001081756 | Nckap5 | 110448 | 128616562 | 128616762 |
| 1 | 127810213 | 128727210 - | NM_001081756 | Nckap5 | 178253 | 128548757 | 128548957 |
| 1 | 127810213 | 128727210 - | NM_001081756 | Nckap5 | 237351 | 128489659 | 128489859 |
| 1 | 127810213 | 128727210 - | NM_001081756 | Nckap5 | 189445 | 128537565 | 128537765 |
| 1 | 127810213 | 128727210 - | NM_001081756 | Nckap5 | 768009 | 127959001 | 127959201 |
| 1 | 127810213 | 128389505 - | NM_172484    | Nckap5 | 430304 | 127959001 | 127959201 |
| 1 | 127810213 | 128727210 - | NM_176957    | Nckap5 | 78026  | 128648984 | 128649184 |
| 1 | 127810213 | 128727210 - | NM_176957    | Nckap5 | 179503 | 128547507 | 128547707 |
| 1 | 127810213 | 128727210 - | NM_176957    | Nckap5 | 157284 | 128569726 | 128569926 |
| 1 | 127810213 | 128727210 - | NM_176957    | Nckap5 | 110448 | 128616562 | 128616762 |
| 1 | 127810213 | 128727210 - | NM_176957    | Nckap5 | 178253 | 128548757 | 128548957 |
| 1 | 127810213 | 128727210 - | NM_176957    | Nckap5 | 237351 | 128489659 | 128489859 |
| 1 | 127810213 | 128727210 - | NM_176957    | Nckap5 | 189445 | 128537565 | 128537765 |
| 1 | 127810213 | 128727210 - | NM_176957    | Nckap5 | 768009 | 127959001 | 127959201 |
| 1 | 129101563 | 129379550 + | NM_145128    | Mgat5  | 158814 | 129260377 | 129260577 |
| 1 | 129101563 | 129379550 + | NM_145128    | Mgat5  | 46728  | 129148291 | 129148491 |
| 1 | 129101563 | 129379550 + | NM_145128    | Mgat5  | 110949 | 129212512 | 129212712 |
| 1 | 129101563 | 129379550 + | NM_145128    | Mgat5  | 152567 | 129254130 | 129254330 |
| 1 | 129101563 | 129379550 + | NM_145128    | Mgat5  | 82601  | 129184164 | 129184364 |
| 1 | 129101563 | 129379550 + | NM_145128    | Mgat5  | 28480  | 129130043 | 129130243 |
| 1 | 129101563 | 129379550 + | NM_145128    | Mgat5  | 39122  | 129140685 | 129140885 |
| 1 | 129101563 | 129379550 + | NM_145128    | Mgat5  | 12052  | 129113615 | 129113815 |
| 1 | 130181341 | 130224896 - | NM_001081078 | Lct    | 4806   | 130219890 | 130220090 |
| 1 | 130181341 | 130224896 - | NM_001081078 | Lct    | -9528  | 130234424 | 130234624 |

|   |           |             |              |          |        |           |           |
|---|-----------|-------------|--------------|----------|--------|-----------|-----------|
| 1 | 130228168 | 130256234 - | NM_008567    | Mcm6     | 21610  | 130234424 | 130234624 |
| 1 | 130260284 | 130313994 - | NM_177445    | Dars     | 18012  | 130295782 | 130295982 |
| 1 | 130260284 | 130313994 - | NM_177445    | Dars     | 639    | 130313155 | 130313355 |
| 1 | 130308695 | 130313994 - | NM_145507    | Dars     | 639    | 130313155 | 130313355 |
| 1 | 131169881 | 132115856 + | NM_172485    | Thsd7b   | 683468 | 131853349 | 131853549 |
| 1 | 132566779 | 132578149 - | NR_028304    | C4bp-ps1 | -2714  | 132580863 | 132581063 |
| 1 | 132566779 | 132578149 - | NR_028304    | C4bp-ps1 | 165    | 132577784 | 132577984 |
| 1 | 132585620 | 132625831 - | NM_001162415 | Pfkfb2   | -4813  | 132630644 | 132630844 |
| 1 | 132585620 | 132625831 - | NM_001162415 | Pfkfb2   | -9808  | 132635639 | 132635839 |
| 1 | 132585620 | 132625831 - | NM_001162415 | Pfkfb2   | 33948  | 132591683 | 132591883 |
| 1 | 132585620 | 132612399 - | NR_027859    | Pfkfb2   | 20516  | 132591683 | 132591883 |
| 1 | 132588832 | 132612399 - | NM_008825    | Pfkfb2   | 20516  | 132591683 | 132591883 |
| 1 | 132628553 | 132641200 + | NM_177604    | AA986860 | 8025   | 132636578 | 132636778 |
| 1 | 132628553 | 132641200 + | NM_177604    | AA986860 | 2091   | 132630644 | 132630844 |
| 1 | 132628553 | 132641200 + | NM_177604    | AA986860 | 7086   | 132635639 | 132635839 |
| 1 | 132697479 | 132711318 + | NM_001170632 | Fcamr    | -7982  | 132689297 | 132689497 |
| 1 | 132697479 | 132711318 + | NM_144960    | Fcamr    | -7982  | 132689297 | 132689497 |
| 1 | 132723261 | 132748827 + | NM_011082    | Pigr     | 5945   | 132729206 | 132729406 |
| 1 | 132723261 | 132748827 + | NM_011082    | Pigr     | 4592   | 132727853 | 132728053 |
| 1 | 132723261 | 132748827 + | NM_011082    | Pigr     | -4334  | 132718727 | 132718927 |
| 1 | 132950281 | 132994121 - | NM_008551    | Mapkapk2 | 17411  | 132976510 | 132976710 |
| 1 | 133181828 | 133423939 - | NM_001081011 | Srgap2   | -358   | 133424297 | 133424497 |
| 1 | 133424566 | 133436450 + | NM_175382    | Fam72a   | -69    | 133424297 | 133424497 |
| 1 | 133859492 | 133879550 + | NM_001177628 | Slc45a3  | -7291  | 133852001 | 133852201 |
| 1 | 133923198 | 133964640 - | NM_172510    | Mfsd4    | 12657  | 133951783 | 133951983 |
| 1 | 133933360 | 133964640 - | NM_001114662 | Mfsd4    | 12657  | 133951783 | 133951983 |
| 1 | 134010124 | 134036263 - | NM_008795    | Cdk18    | 25478  | 134010585 | 134010785 |
| 1 | 134010124 | 134036263 - | NM_008795    | Cdk18    | 13458  | 134022605 | 134022805 |
| 1 | 134212702 | 134230066 + | NM_001195025 | Nuak2    | 3468   | 134216170 | 134216370 |
| 1 | 134212702 | 134230066 + | NM_001195025 | Nuak2    | 12731  | 134225433 | 134225633 |

|   |           |             |              |          |       |           |           |
|---|-----------|-------------|--------------|----------|-------|-----------|-----------|
| 1 | 134212702 | 134230066 + | NM_001195025 | Nuak2    | 5470  | 134218172 | 134218372 |
| 1 | 134212702 | 134230066 + | NM_028778    | Nuak2    | 3468  | 134216170 | 134216370 |
| 1 | 134212702 | 134230066 + | NM_028778    | Nuak2    | 12731 | 134225433 | 134225633 |
| 1 | 134212702 | 134230066 + | NM_028778    | Nuak2    | 5470  | 134218172 | 134218372 |
| 1 | 134252892 | 134286896 - | NM_001311107 | Tmcc2    | 22265 | 134264431 | 134264631 |
| 1 | 134252892 | 134264526 - | NM_001311108 | Tmcc2    | 0     | 134264431 | 134264631 |
| 1 | 134252892 | 134287964 - | NM_178874    | Tmcc2    | 23333 | 134264431 | 134264631 |
| 1 | 134942589 | 135005266 + | NM_001099276 | Pik3c2b  | 37311 | 134979900 | 134980100 |
| 1 | 134942589 | 135005266 + | NM_001099276 | Pik3c2b  | 38120 | 134980709 | 134980909 |
| 1 | 134942589 | 135005266 + | NM_001099276 | Pik3c2b  | -4840 | 134937549 | 134937749 |
| 1 | 135027743 | 135036378 + | NM_133819    | Ppp1r15b | -135  | 135027408 | 135027608 |
| 1 | 135027743 | 135036378 + | NM_133819    | Ppp1r15b | 2879  | 135030622 | 135030822 |
| 1 | 135027743 | 135036378 + | NM_133819    | Ppp1r15b | -3518 | 135024025 | 135024225 |
| 1 | 135142674 | 135200013 + | NM_001160268 | Plekha6  | 19331 | 135162005 | 135162205 |
| 1 | 135142674 | 135200013 + | NM_001160268 | Plekha6  | -1220 | 135141254 | 135141454 |
| 1 | 135142674 | 135200013 + | NM_182930    | Plekha6  | 19331 | 135162005 | 135162205 |
| 1 | 135142674 | 135200013 + | NM_182930    | Plekha6  | -1220 | 135141254 | 135141454 |
| 1 | 135146429 | 135166386 - | NR_037984    | Gm19461  | 4181  | 135162005 | 135162205 |
| 1 | 135247143 | 135256901 + | NM_031193    | Ren2     | -2457 | 135244486 | 135244686 |
| 1 | 135247143 | 135256901 + | NM_031193    | Ren2     | -2919 | 135244024 | 135244224 |
| 1 | 135247251 | 135256897 + | NM_031192    | Ren1     | -2565 | 135244486 | 135244686 |
| 1 | 135247251 | 135256897 + | NM_031192    | Ren1     | -3027 | 135244024 | 135244224 |
| 1 | 135278877 | 135320790 - | NM_011439    | Sox13    | 21386 | 135299204 | 135299404 |
| 1 | 135278877 | 135320790 - | NM_011439    | Sox13    | 11591 | 135308999 | 135309199 |
| 1 | 135278877 | 135320790 - | NM_011439    | Sox13    | 25228 | 135295362 | 135295562 |
| 1 | 135500448 | 135506858 - | NM_009227    | Snrpe    | -265  | 135507123 | 135507323 |
| 1 | 135500448 | 135506858 - | NM_009227    | Snrpe    | -8419 | 135515277 | 135515477 |
| 1 | 135500448 | 135506858 - | NM_009227    | Snrpe    | -7751 | 135514609 | 135514809 |
| 1 | 135516448 | 135557977 - | NM_001276767 | Zc3h11a  | -8796 | 135566773 | 135566973 |
| 1 | 135516448 | 135557977 - | NM_144530    | Zc3h11a  | -8796 | 135566773 | 135566973 |

|   |           |             |              |               |       |           |           |
|---|-----------|-------------|--------------|---------------|-------|-----------|-----------|
| 1 | 135552456 | 135557463 - | NM_001166552 | Zbed6         | -9310 | 135566773 | 135566973 |
| 1 | 135575606 | 135586686 - | NM_001159649 | Lax1          | 4369  | 135582117 | 135582317 |
| 1 | 135575606 | 135586594 - | NM_172842    | Lax1          | 4277  | 135582117 | 135582317 |
| 1 | 135971442 | 135975733 - | NM_007570    | Btg2          | 437   | 135975096 | 135975296 |
| 1 | 135971442 | 135975733 - | NM_007570    | Btg2          | -7762 | 135983495 | 135983695 |
| 1 | 135971442 | 135975733 - | NM_007570    | Btg2          | 853   | 135974680 | 135974880 |
| 1 | 136095792 | 136132035 - | NM_001008533 | Adora1        | 8411  | 136123424 | 136123624 |
| 1 | 136095792 | 136132035 - | NM_001008533 | Adora1        | 10374 | 136121461 | 136121661 |
| 1 | 136095792 | 136132035 - | NM_001008533 | Adora1        | 9142  | 136122693 | 136122893 |
| 1 | 136095792 | 136132035 - | NM_001008533 | Adora1        | 29545 | 136102290 | 136102490 |
| 1 | 136095792 | 136132035 - | NM_001039510 | Adora1        | 8411  | 136123424 | 136123624 |
| 1 | 136095792 | 136132035 - | NM_001039510 | Adora1        | 10374 | 136121461 | 136121661 |
| 1 | 136095792 | 136132035 - | NM_001039510 | Adora1        | 9142  | 136122693 | 136122893 |
| 1 | 136095792 | 136132035 - | NM_001039510 | Adora1        | 29545 | 136102290 | 136102490 |
| 1 | 136095792 | 136132035 - | NM_001282945 | Adora1        | 8411  | 136123424 | 136123624 |
| 1 | 136095792 | 136132035 - | NM_001282945 | Adora1        | 10374 | 136121461 | 136121661 |
| 1 | 136095792 | 136132035 - | NM_001282945 | Adora1        | 9142  | 136122693 | 136122893 |
| 1 | 136095792 | 136132035 - | NM_001282945 | Adora1        | 29545 | 136102290 | 136102490 |
| 1 | 136095792 | 136131434 - | NM_001291928 | Adora1        | 7810  | 136123424 | 136123624 |
| 1 | 136095792 | 136131434 - | NM_001291928 | Adora1        | 9773  | 136121461 | 136121661 |
| 1 | 136095792 | 136131434 - | NM_001291928 | Adora1        | 8541  | 136122693 | 136122893 |
| 1 | 136095792 | 136131434 - | NM_001291928 | Adora1        | 28944 | 136102290 | 136102490 |
| 1 | 136095792 | 136132035 - | NM_001291930 | Adora1        | 8411  | 136123424 | 136123624 |
| 1 | 136095792 | 136132035 - | NM_001291930 | Adora1        | 10374 | 136121461 | 136121661 |
| 1 | 136095792 | 136132035 - | NM_001291930 | Adora1        | 9142  | 136122693 | 136122893 |
| 1 | 136095792 | 136132035 - | NM_001291930 | Adora1        | 29545 | 136102290 | 136102490 |
| 1 | 136193360 | 136229506 - | NM_001144855 | Ppfia4        | 5728  | 136223578 | 136223778 |
| 1 | 136242674 | 136258577 - | NM_001042485 | Tmem183a      | 3463  | 136254914 | 136255114 |
| 1 | 136242674 | 136258577 - | NM_020588    | Tmem183a      | 3463  | 136254914 | 136255114 |
| 1 | 136282517 | 136287561 + | NM_173771    | 4933406M09Rik | -3291 | 136279026 | 136279226 |

|   |           |             |              |               |       |           |           |
|---|-----------|-------------|--------------|---------------|-------|-----------|-----------|
| 1 | 137278892 | 137327069 - | NM_153774    | Ipo9          | -772  | 137327841 | 137328041 |
| 1 | 137331157 | 137481933 - | NM_173437    | Nav1          | 35198 | 137446535 | 137446735 |
| 1 | 137331157 | 137481933 - | NM_173437    | Nav1          | 28136 | 137453597 | 137453797 |
| 1 | 137331157 | 137481933 - | NM_173437    | Nav1          | 29227 | 137452506 | 137452706 |
| 1 | 137695998 | 137707567 + | NM_021467    | Tnni1         | -9337 | 137686461 | 137686661 |
| 1 | 137695998 | 137707567 + | NM_021467    | Tnni1         | 1077  | 137697075 | 137697275 |
| 1 | 137696088 | 137707567 + | NM_001112702 | Tnni1         | -9427 | 137686461 | 137686661 |
| 1 | 137696088 | 137707567 + | NM_001112702 | Tnni1         | 987   | 137697075 | 137697275 |
| 1 | 137715175 | 137729919 + | NM_133664    | Lad1          | 3826  | 137719001 | 137719201 |
| 1 | 137850155 | 137902920 - | NM_177642    | Igfn1         | -8552 | 137911472 | 137911672 |
| 1 | 137850155 | 137902920 - | NM_177642    | Igfn1         | -1532 | 137904452 | 137904652 |
| 1 | 137904796 | 137931608 + | NM_001160145 | Tmem9         | 6676  | 137911472 | 137911672 |
| 1 | 137904796 | 137931608 + | NM_001160145 | Tmem9         | -144  | 137904452 | 137904652 |
| 1 | 137914578 | 137931608 + | NM_025439    | Tmem9         | -2906 | 137911472 | 137911672 |
| 1 | 137914578 | 137931608 + | NM_025439    | Tmem9         | -9926 | 137904452 | 137904652 |
| 1 | 137914733 | 137931608 + | NM_001160146 | Tmem9         | -3061 | 137911472 | 137911672 |
| 1 | 138027978 | 138074592 + | NM_001039472 | Kif21b        | 25619 | 138053597 | 138053797 |
| 1 | 138027978 | 138074592 + | NM_001039472 | Kif21b        | -4987 | 138022791 | 138022991 |
| 1 | 138110099 | 138130858 - | NM_028872    | 5730559C18Rik | 4477  | 138126181 | 138126381 |
| 1 | 138110099 | 138130858 - | NM_028872    | 5730559C18Rik | 2829  | 138127829 | 138128029 |
| 1 | 138110099 | 138130858 - | NM_028872    | 5730559C18Rik | 3312  | 138127346 | 138127546 |
| 1 | 138110099 | 138130858 - | NM_028872    | 5730559C18Rik | 13730 | 138116928 | 138117128 |
| 1 | 138110099 | 138130858 - | NM_028872    | 5730559C18Rik | 6905  | 138123753 | 138123953 |
| 1 | 138592788 | 138622306 + | NR_037986    | Platr22       | 3478  | 138596266 | 138596466 |
| 1 | 138592788 | 138622306 + | NR_037986    | Platr22       | 19497 | 138612285 | 138612485 |
| 1 | 138740161 | 138850208 - | NM_001159769 | Nr5a2         | 22064 | 138827944 | 138828144 |
| 1 | 138740161 | 138850208 - | NM_001159769 | Nr5a2         | -6892 | 138857100 | 138857300 |
| 1 | 138740161 | 138850208 - | NM_001159769 | Nr5a2         | 58786 | 138791222 | 138791422 |
| 1 | 138740161 | 138850208 - | NM_001159769 | Nr5a2         | 42621 | 138807387 | 138807587 |
| 1 | 138740161 | 138850208 - | NM_001159769 | Nr5a2         | 90869 | 138759139 | 138759339 |



|   |           |             |              |               |       |           |           |
|---|-----------|-------------|--------------|---------------|-------|-----------|-----------|
| 1 | 138740161 | 138857026 - | NM_030676    | Nr5a2         | 28882 | 138827944 | 138828144 |
| 1 | 138740161 | 138857026 - | NM_030676    | Nr5a2         | -74   | 138857100 | 138857300 |
| 1 | 138740161 | 138857026 - | NM_030676    | Nr5a2         | 65604 | 138791222 | 138791422 |
| 1 | 138740161 | 138857026 - | NM_030676    | Nr5a2         | 49439 | 138807387 | 138807587 |
| 1 | 138740161 | 138857026 - | NM_030676    | Nr5a2         | 97687 | 138759139 | 138759339 |
| 1 | 140860286 | 141072620 + | NM_001166501 | Dennd1b       | -409  | 140859677 | 140859877 |
| 1 | 140860286 | 141072620 + | NM_001166501 | Dennd1b       | 20455 | 140880741 | 140880941 |
| 1 | 140860286 | 141072620 + | NM_001166501 | Dennd1b       | 5176  | 140865462 | 140865662 |
| 1 | 140864298 | 141072620 + | NM_181347    | Dennd1b       | -4421 | 140859677 | 140859877 |
| 1 | 140864298 | 141072620 + | NM_181347    | Dennd1b       | 16443 | 140880741 | 140880941 |
| 1 | 140864298 | 141072620 + | NM_181347    | Dennd1b       | 1164  | 140865462 | 140865662 |
| 1 | 140874234 | 140875824 + | NR_108103    | 4930596I21Rik | -8572 | 140865462 | 140865662 |
| 1 | 151676749 | 151769570 - | NM_001305632 | Pla2g4a       | 3864  | 151765506 | 151765706 |
| 1 | 151676749 | 151808421 - | NM_008869    | Pla2g4a       | 28525 | 151779696 | 151779896 |
| 1 | 151676749 | 151808421 - | NM_008869    | Pla2g4a       | 42715 | 151765506 | 151765706 |
| 1 | 152985164 | 152991226 + | NR_038011    | C730036E19Rik | -6188 | 152978776 | 152978976 |
| 1 | 152985164 | 152991226 + | NR_038011    | C730036E19Rik | -8775 | 152976189 | 152976389 |
| 1 | 153191628 | 153203929 + | NM_001039511 | Ivns1abp      | 6935  | 153198563 | 153198763 |
| 1 | 153191628 | 153203929 + | NM_001039511 | Ivns1abp      | 7777  | 153199405 | 153199605 |
| 1 | 153191628 | 153203929 + | NM_001039511 | Ivns1abp      | -269  | 153191159 | 153191359 |
| 1 | 153191628 | 153211576 + | NM_001039512 | Ivns1abp      | 6935  | 153198563 | 153198763 |
| 1 | 153191628 | 153211576 + | NM_001039512 | Ivns1abp      | 7777  | 153199405 | 153199605 |
| 1 | 153191628 | 153211576 + | NM_001039512 | Ivns1abp      | -269  | 153191159 | 153191359 |
| 1 | 153191628 | 153211576 + | NM_054102    | Ivns1abp      | 6935  | 153198563 | 153198763 |
| 1 | 153191628 | 153211576 + | NM_054102    | Ivns1abp      | 7777  | 153199405 | 153199605 |
| 1 | 153191628 | 153211576 + | NM_054102    | Ivns1abp      | -269  | 153191159 | 153191359 |
| 1 | 153214829 | 153275566 - | NM_025819    | Swt1          | 29283 | 153246083 | 153246283 |
| 1 | 153214829 | 153275566 - | NM_025819    | Swt1          | 1137  | 153274229 | 153274429 |
| 1 | 153275778 | 153305314 + | NM_026876    | Trmt1l        | -1349 | 153274229 | 153274429 |
| 1 | 153602504 | 153669459 + | NM_001039644 | Edem3         | 23177 | 153625681 | 153625881 |

|   |           |             |              |               |        |           |           |
|---|-----------|-------------|--------------|---------------|--------|-----------|-----------|
| 1 | 153602504 | 153669459 + | NM_001039644 | Edem3         | -4829  | 153597475 | 153597675 |
| 1 | 153602504 | 153669459 + | NM_001039644 | Edem3         | -1453  | 153600851 | 153601051 |
| 1 | 153602504 | 153669459 + | NM_001311165 | Edem3         | 23177  | 153625681 | 153625881 |
| 1 | 153602504 | 153669459 + | NM_001311165 | Edem3         | -4829  | 153597475 | 153597675 |
| 1 | 153602504 | 153669459 + | NM_001311165 | Edem3         | -1453  | 153600851 | 153601051 |
| 1 | 153602504 | 153669459 + | NM_001311166 | Edem3         | 23177  | 153625681 | 153625881 |
| 1 | 153602504 | 153669459 + | NM_001311166 | Edem3         | -4829  | 153597475 | 153597675 |
| 1 | 153602504 | 153669459 + | NM_001311166 | Edem3         | -1453  | 153600851 | 153601051 |
| 1 | 153731654 | 153937451 - | NM_197990    | 1700025G04Rik | 93321  | 153843930 | 153844130 |
| 1 | 153731654 | 153937451 - | NM_197990    | 1700025G04Rik | 38191  | 153899060 | 153899260 |
| 1 | 153731654 | 153937451 - | NM_197990    | 1700025G04Rik | 4807   | 153932444 | 153932644 |
| 1 | 153731654 | 153937451 - | NM_197990    | 1700025G04Rik | -8691  | 153946142 | 153946342 |
| 1 | 153731654 | 153937451 - | NM_197990    | 1700025G04Rik | 5347   | 153931904 | 153932104 |
| 1 | 153731654 | 153937451 - | NM_197990    | 1700025G04Rik | 50000  | 153887251 | 153887451 |
| 1 | 153731654 | 153937451 - | NM_197990    | 1700025G04Rik | 49030  | 153888221 | 153888421 |
| 1 | 153731654 | 153937451 - | NM_197990    | 1700025G04Rik | 52446  | 153884805 | 153885005 |
| 1 | 153731654 | 153937451 - | NM_197990    | 1700025G04Rik | 98806  | 153838445 | 153838645 |
| 1 | 153731654 | 153937451 - | NM_197990    | 1700025G04Rik | 105017 | 153832234 | 153832434 |
| 1 | 154364660 | 154472242 - | NM_016846    | Rgl1          | 103964 | 154368078 | 154368278 |
| 1 | 154684125 | 154749777 - | NM_001005507 | Smg7          | -1959  | 154751736 | 154751936 |
| 1 | 154684125 | 154749777 - | NM_001160256 | Smg7          | -1959  | 154751736 | 154751936 |
| 1 | 154802231 | 154966392 + | NM_175460    | Nmnat2        | 25634  | 154827865 | 154828065 |
| 1 | 154802231 | 154966392 + | NM_175460    | Nmnat2        | 79060  | 154881291 | 154881491 |
| 1 | 154969886 | 155033578 - | NM_008485    | Lamc2         | 35008  | 154998370 | 154998570 |
| 1 | 154969886 | 155033578 - | NM_008485    | Lamc2         | -1657  | 155035235 | 155035435 |
| 1 | 154969886 | 155033578 - | NM_008485    | Lamc2         | 44929  | 154988449 | 154988649 |
| 1 | 155066052 | 155179917 - | NM_010683    | Lamc1         | 11688  | 155168029 | 155168229 |
| 1 | 155596556 | 155611352 + | NM_011882    | Rnasel        | 2329   | 155598885 | 155599085 |
| 1 | 156943497 | 156946767 - | NM_010500    | Ier5          | 1999   | 156944568 | 156944768 |
| 1 | 156975008 | 156993911 - | NM_008209    | Mr1           | -8462  | 157002373 | 157002573 |

|   |           |             |              |          |       |           |           |
|---|-----------|-------------|--------------|----------|-------|-----------|-----------|
| 1 | 157005833 | 157050648 + | NM_021433    | Stx6     | 42650 | 157048483 | 157048683 |
| 1 | 157005833 | 157050648 + | NM_021433    | Stx6     | -3260 | 157002373 | 157002573 |
| 1 | 157122787 | 157264575 - | NM_011273    | Xpr1     | 42976 | 157221399 | 157221599 |
| 1 | 157692094 | 157820386 - | NM_001039184 | Cep350   | 28620 | 157791566 | 157791766 |
| 1 | 157692094 | 157820386 - | NM_001039184 | Cep350   | -1770 | 157822156 | 157822356 |
| 1 | 157851729 | 157883611 - | NM_001160018 | Tor1aip1 | -7708 | 157891319 | 157891519 |
| 1 | 157851729 | 157881948 - | NM_001160019 | Tor1aip1 | -9371 | 157891319 | 157891519 |
| 1 | 157851729 | 157883611 - | NM_144791    | Tor1aip1 | -7708 | 157891319 | 157891519 |
| 1 | 157882794 | 157915990 + | NM_172843    | Tor1aip2 | 8525  | 157891319 | 157891519 |
| 1 | 157882857 | 157900867 + | NM_001160180 | Tor1aip2 | 8462  | 157891319 | 157891519 |
| 1 | 157883166 | 157900867 + | NM_001160182 | Tor1aip2 | 8153  | 157891319 | 157891519 |
| 1 | 157887991 | 157900867 + | NM_001160181 | Tor1aip2 | 3328  | 157891319 | 157891519 |
| 1 | 157887991 | 157900867 + | NM_022329    | Tor1aip2 | 3328  | 157891319 | 157891519 |
| 1 | 158358239 | 158404460 - | NM_009230    | Soat1    | 11476 | 158392784 | 158392984 |
| 1 | 158358239 | 158404460 - | NM_009230    | Soat1    | -3413 | 158407873 | 158408073 |
| 1 | 158358239 | 158404460 - | NM_009230    | Soat1    | 3453  | 158400807 | 158401007 |
| 1 | 158583748 | 158604471 - | NM_023141    | Tor3a    | 6611  | 158597660 | 158597860 |
| 1 | 158608702 | 158649042 - | NM_145413    | Fam20b   | 16151 | 158632691 | 158632891 |
| 1 | 158608702 | 158649042 - | NM_145413    | Fam20b   | 517   | 158648325 | 158648525 |
| 1 | 158734297 | 158869758 - | NM_001159965 | Ralgps2  | 77806 | 158791752 | 158791952 |
| 1 | 158734297 | 158869758 - | NM_001159965 | Ralgps2  | 30067 | 158839491 | 158839691 |
| 1 | 158734297 | 158869519 - | NM_001159966 | Ralgps2  | 77567 | 158791752 | 158791952 |
| 1 | 158734297 | 158869519 - | NM_001159966 | Ralgps2  | 29828 | 158839491 | 158839691 |
| 1 | 158734297 | 158869758 - | NM_001159967 | Ralgps2  | 77806 | 158791752 | 158791952 |
| 1 | 158734297 | 158869758 - | NM_001159967 | Ralgps2  | 30067 | 158839491 | 158839691 |
| 1 | 158734297 | 158869758 - | NM_001159968 | Ralgps2  | 77806 | 158791752 | 158791952 |
| 1 | 158734297 | 158869758 - | NM_001159968 | Ralgps2  | 30067 | 158839491 | 158839691 |
| 1 | 158734297 | 158869758 - | NM_023884    | Ralgps2  | 77806 | 158791752 | 158791952 |
| 1 | 158734297 | 158869758 - | NM_023884    | Ralgps2  | 30067 | 158839491 | 158839691 |
| 1 | 158734297 | 158869758 - | NR_027640    | Ralgps2  | 77806 | 158791752 | 158791952 |

|   |           |             |              |          |        |           |           |
|---|-----------|-------------|--------------|----------|--------|-----------|-----------|
| 1 | 158734297 | 158869758 - | NR_027640    | Ralgps2  | 30067  | 158839491 | 158839691 |
| 1 | 159065314 | 159342727 - | NM_177644    | Rasal2   | 78341  | 159264186 | 159264386 |
| 1 | 159065314 | 159342727 - | NM_177644    | Rasal2   | 65633  | 159276894 | 159277094 |
| 1 | 159065314 | 159342727 - | NM_177644    | Rasal2   | 89203  | 159253324 | 159253524 |
| 1 | 159388713 | 159418865 + | NM_001033284 | BC026585 | 27481  | 159416194 | 159416394 |
| 1 | 159436927 | 159498556 + | NM_033354    | Sec16b   | 19993  | 159456920 | 159457120 |
| 1 | 159436927 | 159498556 + | NR_027641    | Sec16b   | 19993  | 159456920 | 159457120 |
| 1 | 159456301 | 159498556 + | NM_001159986 | Sec16b   | 619    | 159456920 | 159457120 |
| 1 | 161162457 | 161277712 + | NM_011931    | Rfwd2    | 18286  | 161180743 | 161180943 |
| 1 | 161453900 | 161855054 + | NM_022312    | Tnr      | 202673 | 161656573 | 161656773 |
| 1 | 162149305 | 162281703 - | NM_001038621 | Rabgap1l | 88154  | 162193349 | 162193549 |
| 1 | 162149305 | 162281703 - | NM_001038621 | Rabgap1l | 123690 | 162157813 | 162158013 |
| 1 | 162186703 | 162723070 - | NM_013862    | Rabgap1l | 220430 | 162502440 | 162502640 |
| 1 | 162186703 | 162723070 - | NM_013862    | Rabgap1l | 5449   | 162717421 | 162717621 |
| 1 | 162186703 | 162723070 - | NM_013862    | Rabgap1l | 102360 | 162620510 | 162620710 |
| 1 | 162186703 | 162723070 - | NM_013862    | Rabgap1l | 99743  | 162623127 | 162623327 |
| 1 | 162186703 | 162723070 - | NM_013862    | Rabgap1l | 131402 | 162591468 | 162591668 |
| 1 | 162186703 | 162723070 - | NM_013862    | Rabgap1l | 529521 | 162193349 | 162193549 |
| 1 | 162836542 | 162905108 + | NM_001024952 | Rc3h1    | 12360  | 162848902 | 162849102 |
| 1 | 163170243 | 163181342 - | NM_001303408 | Prdx6    | 921    | 163180221 | 163180421 |
| 1 | 163170243 | 163181342 - | NM_007453    | Prdx6    | 921    | 163180221 | 163180421 |
| 1 | 163170243 | 163181342 - | NR_130150    | Prdx6    | 921    | 163180221 | 163180421 |
| 1 | 163917433 | 164408162 - | NM_001038619 | Dnm3     | 436837 | 163971125 | 163971325 |
| 1 | 163920354 | 164408166 - | NM_172646    | Dnm3     | 436841 | 163971125 | 163971325 |
| 1 | 164724014 | 164742681 - | NM_144878    | Fmo4     | -1295  | 164743976 | 164744176 |
| 1 | 164724014 | 164742681 - | NM_144878    | Fmo4     | 1037   | 164741444 | 164741644 |
| 1 | 164724014 | 164742681 - | NM_144878    | Fmo4     | -783   | 164743464 | 164743664 |
| 1 | 164759692 | 164796680 - | NM_010231    | Fmo1     | -4481  | 164801161 | 164801361 |
| 1 | 164805178 | 164828844 - | NM_018881    | Fmo2     | 13540  | 164815104 | 164815304 |
| 1 | 164805178 | 164828844 - | NM_018881    | Fmo2     | 12321  | 164816323 | 164816523 |

|   |           |             |              |         |        |           |           |
|---|-----------|-------------|--------------|---------|--------|-----------|-----------|
| 1 | 164954433 | 165015802 - | NM_030071    | Mroh9   | 14920  | 165000682 | 165000882 |
| 1 | 165175250 | 165243782 - | NM_011127    | Prrx1   | 24218  | 165219364 | 165219564 |
| 1 | 165175250 | 165243782 - | NM_175686    | Prrx1   | 24218  | 165219364 | 165219564 |
| 1 | 165185408 | 165243782 - | NM_001025570 | Prrx1   | 24218  | 165219364 | 165219564 |
| 1 | 166081966 | 166150409 + | NM_007976    | F5      | 38120  | 166120086 | 166120286 |
| 1 | 166081966 | 166150409 + | NM_007976    | F5      | 60686  | 166142652 | 166142852 |
| 1 | 166179177 | 166195517 + | NM_001276455 | Slc19a2 | -317   | 166178660 | 166178860 |
| 1 | 166179177 | 166195517 + | NM_054087    | Slc19a2 | -317   | 166178660 | 166178860 |
| 1 | 166219931 | 166237616 - | NM_001160208 | Blzf1   | 17     | 166237399 | 166237599 |
| 1 | 166219931 | 166237616 - | NM_001160209 | Blzf1   | 17     | 166237399 | 166237599 |
| 1 | 166219931 | 166237616 - | NM_025505    | Blzf1   | 17     | 166237399 | 166237599 |
| 1 | 166237803 | 166367432 + | NM_001293313 | Nme7    | -204   | 166237399 | 166237599 |
| 1 | 166237803 | 166367432 + | NM_001293313 | Nme7    | 111399 | 166349202 | 166349402 |
| 1 | 166237803 | 166367432 + | NM_001293313 | Nme7    | 126508 | 166364311 | 166364511 |
| 1 | 166237803 | 166367432 + | NM_001293313 | Nme7    | 113069 | 166350872 | 166351072 |
| 1 | 166237803 | 166367432 + | NM_001293313 | Nme7    | 105131 | 166342934 | 166343134 |
| 1 | 166237803 | 166367432 + | NM_001293313 | Nme7    | 109370 | 166347173 | 166347373 |
| 1 | 166237803 | 166367432 + | NM_001293313 | Nme7    | 34552  | 166272355 | 166272555 |
| 1 | 166237803 | 166367432 + | NM_138314    | Nme7    | -204   | 166237399 | 166237599 |
| 1 | 166237803 | 166367432 + | NM_138314    | Nme7    | 111399 | 166349202 | 166349402 |
| 1 | 166237803 | 166367432 + | NM_138314    | Nme7    | 126508 | 166364311 | 166364511 |
| 1 | 166237803 | 166367432 + | NM_138314    | Nme7    | 113069 | 166350872 | 166351072 |
| 1 | 166237803 | 166367432 + | NM_138314    | Nme7    | 105131 | 166342934 | 166343134 |
| 1 | 166237803 | 166367432 + | NM_138314    | Nme7    | 109370 | 166347173 | 166347373 |
| 1 | 166237803 | 166367432 + | NM_138314    | Nme7    | 34552  | 166272355 | 166272555 |
| 1 | 166237803 | 166279567 + | NM_178071    | Nme7    | -204   | 166237399 | 166237599 |
| 1 | 166237803 | 166279567 + | NM_178071    | Nme7    | 34552  | 166272355 | 166272555 |
| 1 | 166861779 | 166865642 - | NM_008510    | Xcl1    | -9606  | 166875248 | 166875448 |
| 1 | 166861779 | 166865642 - | NM_008510    | Xcl1    | 1419   | 166864023 | 166864223 |
| 1 | 167067984 | 167090905 - | NM_032005    | Tbx19   | -3742  | 167094647 | 167094847 |

|   |           |             |              |         |        |           |           |
|---|-----------|-------------|--------------|---------|--------|-----------|-----------|
| 1 | 167104472 | 167124565 - | NM_145512    | Sft2d2  | 9950   | 167114415 | 167114615 |
| 1 | 167142417 | 167167090 - | NM_145513    | Tipr1   | 19496  | 167147394 | 167147594 |
| 1 | 167522312 | 167564673 - | NM_001001880 | Mpzl1   | 27754  | 167536719 | 167536919 |
| 1 | 167522312 | 167564673 - | NM_001083897 | Mpzl1   | 27754  | 167536719 | 167536919 |
| 1 | 167693911 | 167705436 + | NM_011804    | Creg1   | 301    | 167694212 | 167694412 |
| 1 | 167795285 | 167932766 - | NM_011137    | Pou2f1  | 17120  | 167915446 | 167915646 |
| 1 | 167795285 | 167932766 - | NM_198932    | Pou2f1  | 17120  | 167915446 | 167915646 |
| 1 | 168028279 | 168058030 - | NM_001033344 | Dusp27  | -4653  | 168062683 | 168062883 |
| 1 | 168028279 | 168058030 - | NM_001160049 | Dusp27  | -4653  | 168062683 | 168062883 |
| 1 | 168060591 | 168096642 + | NM_021610    | Gpa33   | 2092   | 168062683 | 168062883 |
| 1 | 168131516 | 168168876 - | NM_175296    | Mael    | -2021  | 168170897 | 168171097 |
| 1 | 169156217 | 169215259 - | NM_030724    | Uck2    | 11008  | 169204051 | 169204251 |
| 1 | 169280122 | 169298662 + | NM_019993    | Aldh9a1 | 1777   | 169281899 | 169282099 |
| 1 | 169280122 | 169298662 + | NM_019993    | Aldh9a1 | 4601   | 169284723 | 169284923 |
| 1 | 169280122 | 169298662 + | NM_019993    | Aldh9a1 | 4006   | 169284128 | 169284328 |
| 1 | 169280122 | 169298662 + | NM_019993    | Aldh9a1 | -3568  | 169276354 | 169276554 |
| 1 | 169280122 | 169298662 + | NM_019993    | Aldh9a1 | 95     | 169280217 | 169280417 |
| 1 | 169302515 | 169323929 - | NM_025569    | Mgst3   | 9335   | 169314394 | 169314594 |
| 1 | 169302515 | 169323929 - | NM_025569    | Mgst3   | 3913   | 169319816 | 169320016 |
| 1 | 169302515 | 169323929 - | NM_025569    | Mgst3   | 11191  | 169312538 | 169312738 |
| 1 | 170049495 | 170362301 - | NM_008783    | Pbx1    | 4047   | 170358054 | 170358254 |
| 1 | 170049495 | 170362301 - | NM_008783    | Pbx1    | 990    | 170361111 | 170361311 |
| 1 | 170049495 | 170362301 - | NM_008783    | Pbx1    | 187847 | 170174254 | 170174454 |
| 1 | 170049495 | 170362301 - | NM_008783    | Pbx1    | 142635 | 170219466 | 170219666 |
| 1 | 170049495 | 170362301 - | NM_008783    | Pbx1    | 69388  | 170292713 | 170292913 |
| 1 | 170049495 | 170362301 - | NM_008783    | Pbx1    | 143737 | 170218364 | 170218564 |
| 1 | 170083658 | 170362301 - | NM_001291508 | Pbx1    | 4047   | 170358054 | 170358254 |
| 1 | 170083658 | 170362301 - | NM_001291508 | Pbx1    | 990    | 170361111 | 170361311 |
| 1 | 170083658 | 170362301 - | NM_001291508 | Pbx1    | 187847 | 170174254 | 170174454 |
| 1 | 170083658 | 170362301 - | NM_001291508 | Pbx1    | 142635 | 170219466 | 170219666 |

|   |           |             |              |               |        |           |           |
|---|-----------|-------------|--------------|---------------|--------|-----------|-----------|
| 1 | 170083658 | 170362301 - | NM_001291508 | Pbx1          | 69388  | 170292713 | 170292913 |
| 1 | 170083658 | 170362301 - | NM_001291508 | Pbx1          | 143737 | 170218364 | 170218564 |
| 1 | 170083658 | 170362301 - | NM_001291509 | Pbx1          | 4047   | 170358054 | 170358254 |
| 1 | 170083658 | 170362301 - | NM_001291509 | Pbx1          | 990    | 170361111 | 170361311 |
| 1 | 170083658 | 170362301 - | NM_001291509 | Pbx1          | 187847 | 170174254 | 170174454 |
| 1 | 170083658 | 170362301 - | NM_001291509 | Pbx1          | 142635 | 170219466 | 170219666 |
| 1 | 170083658 | 170362301 - | NM_001291509 | Pbx1          | 69388  | 170292713 | 170292913 |
| 1 | 170083658 | 170362301 - | NM_001291509 | Pbx1          | 143737 | 170218364 | 170218564 |
| 1 | 170083658 | 170362301 - | NM_183355    | Pbx1          | 4047   | 170358054 | 170358254 |
| 1 | 170083658 | 170362301 - | NM_183355    | Pbx1          | 990    | 170361111 | 170361311 |
| 1 | 170083658 | 170362301 - | NM_183355    | Pbx1          | 187847 | 170174254 | 170174454 |
| 1 | 170083658 | 170362301 - | NM_183355    | Pbx1          | 142635 | 170219466 | 170219666 |
| 1 | 170083658 | 170362301 - | NM_183355    | Pbx1          | 69388  | 170292713 | 170292913 |
| 1 | 170083658 | 170362301 - | NM_183355    | Pbx1          | 143737 | 170218364 | 170218564 |
| 1 | 171428065 | 171461596 - | NM_023284    | Nuf2          | -87    | 171461683 | 171461883 |
| 1 | 171859070 | 171864785 + | NM_001033185 | 1700084C01Rik | -6750  | 171852120 | 171852320 |
| 1 | 172071354 | 172105096 - | NM_001305045 | Uap1          | 6934   | 172097962 | 172098162 |
| 1 | 172071354 | 172105096 - | NM_001305045 | Uap1          | -1951  | 172107047 | 172107247 |
| 1 | 172071354 | 172105096 - | NM_001305045 | Uap1          | 31486  | 172073410 | 172073610 |
| 1 | 172071354 | 172105096 - | NM_001305046 | Uap1          | 6934   | 172097962 | 172098162 |
| 1 | 172071354 | 172105096 - | NM_001305046 | Uap1          | -1951  | 172107047 | 172107247 |
| 1 | 172071354 | 172105096 - | NM_001305046 | Uap1          | 31486  | 172073410 | 172073610 |
| 1 | 172071354 | 172105096 - | NM_133806    | Uap1          | 6934   | 172097962 | 172098162 |
| 1 | 172071354 | 172105096 - | NM_133806    | Uap1          | -1951  | 172107047 | 172107247 |
| 1 | 172071354 | 172105096 - | NM_133806    | Uap1          | 31486  | 172073410 | 172073610 |
| 1 | 172247627 | 172519981 - | NM_001109985 | Nos1ap        | 197530 | 172322251 | 172322451 |
| 1 | 172247627 | 172519981 - | NM_001109985 | Nos1ap        | -2745  | 172522726 | 172522926 |
| 1 | 172247627 | 172519981 - | NM_001109985 | Nos1ap        | 119187 | 172400594 | 172400794 |
| 1 | 172247627 | 172519981 - | NM_001109985 | Nos1ap        | 22992  | 172496789 | 172496989 |
| 1 | 172247627 | 172519981 - | NM_001109985 | Nos1ap        | 13828  | 172505953 | 172506153 |

|   |           |             |              |         |        |           |           |
|---|-----------|-------------|--------------|---------|--------|-----------|-----------|
| 1 | 172247627 | 172519981 - | NM_001109985 | Nos1ap  | 93727  | 172426054 | 172426254 |
| 1 | 172247627 | 172519981 - | NM_001109985 | Nos1ap  | 132983 | 172386798 | 172386998 |
| 1 | 172247627 | 172519981 - | NM_001109985 | Nos1ap  | 132500 | 172387281 | 172387481 |
| 1 | 172247627 | 172519981 - | NM_001109985 | Nos1ap  | 134299 | 172385482 | 172385682 |
| 1 | 172257345 | 172487242 - | NM_027528    | Nos1ap  | 164791 | 172322251 | 172322451 |
| 1 | 172257345 | 172487242 - | NM_027528    | Nos1ap  | 86448  | 172400594 | 172400794 |
| 1 | 172257345 | 172487242 - | NM_027528    | Nos1ap  | -9547  | 172496789 | 172496989 |
| 1 | 172257345 | 172487242 - | NM_027528    | Nos1ap  | 60988  | 172426054 | 172426254 |
| 1 | 172257345 | 172487242 - | NM_027528    | Nos1ap  | 100244 | 172386798 | 172386998 |
| 1 | 172257345 | 172487242 - | NM_027528    | Nos1ap  | 99761  | 172387281 | 172387481 |
| 1 | 172257345 | 172487242 - | NM_027528    | Nos1ap  | 101560 | 172385482 | 172385682 |
| 1 | 172804319 | 172815672 - | NM_023173    | Dusp12  | -7990  | 172823662 | 172823862 |
| 1 | 173164991 | 173177244 - | NM_153064    | Ndufs2  | -487   | 173177731 | 173177931 |
| 1 | 173164991 | 173177244 - | NM_153064    | Ndufs2  | -41    | 173177285 | 173177485 |
| 1 | 173180553 | 173190054 + | NM_172845    | Adamts4 | -2622  | 173177731 | 173177931 |
| 1 | 173180553 | 173190054 + | NM_172845    | Adamts4 | -3068  | 173177285 | 173177485 |
| 1 | 173207123 | 173211318 - | NM_008911    | Ppox    | 87     | 173211031 | 173211231 |
| 1 | 173367692 | 173394725 + | NM_172647    | F11r    | 1630   | 173369322 | 173369522 |
| 1 | 173367692 | 173394725 + | NM_172647    | F11r    | -1998  | 173365494 | 173365694 |
| 1 | 173996144 | 174012881 - | NM_021607    | Ncstn   | 3026   | 174009655 | 174009855 |
| 1 | 173996144 | 174012881 - | NM_021607    | Ncstn   | 4552   | 174008129 | 174008329 |
| 1 | 174012660 | 174052464 + | NM_009938    | Copa    | -2805  | 174009655 | 174009855 |
| 1 | 174012660 | 174052464 + | NM_009938    | Copa    | 17294  | 174029954 | 174030154 |
| 1 | 174012660 | 174052464 + | NM_009938    | Copa    | -4331  | 174008129 | 174008329 |
| 1 | 174306662 | 174314231 + | NM_026234    | Pigm    | 5902   | 174312564 | 174312764 |
| 1 | 174412344 | 174429009 + | NM_001145800 | Igsf9   | 6759   | 174419103 | 174419303 |
| 1 | 174412448 | 174429009 + | NM_033608    | Igsf9   | 6655   | 174419103 | 174419303 |
| 1 | 174451261 | 174476002 + | NM_027972    | Cfap45  | -1105  | 174449956 | 174450156 |
| 1 | 178744791 | 178950564 + | NM_029756    | Sdccag8 | 176495 | 178921286 | 178921486 |
| 1 | 178744791 | 178950564 + | NM_029756    | Sdccag8 | 3695   | 178748486 | 178748686 |



|   |           |             |              |               |        |           |           |
|---|-----------|-------------|--------------|---------------|--------|-----------|-----------|
| 1 | 178744791 | 178950564 + | NM_029756    | Sdccag8       | 4166   | 178748957 | 178749157 |
| 1 | 179659945 | 179683437 + | NM_027077    | 1700016C15Rik | 18537  | 179678482 | 179678682 |
| 1 | 179659945 | 179683437 + | NM_027077    | 1700016C15Rik | -3556  | 179656189 | 179656389 |
| 1 | 179921566 | 179978423 + | NM_001034899 | Gm16432       | -1324  | 179920042 | 179920242 |
| 1 | 180249284 | 180252825 + | NM_025511    | Cox20         | -2831  | 180246253 | 180246453 |
| 1 | 180459256 | 180862989 + | NM_001161665 | Kif26b        | 174467 | 180633723 | 180633923 |
| 1 | 180459256 | 180862989 + | NM_001161665 | Kif26b        | 179019 | 180638275 | 180638475 |
| 1 | 180459256 | 180862989 + | NM_001161665 | Kif26b        | -1595  | 180457461 | 180457661 |
| 1 | 181476660 | 181557605 + | NM_146105    | Cnst          | 46603  | 181523263 | 181523463 |
| 1 | 181476660 | 181557605 + | NM_146105    | Cnst          | 22411  | 181499071 | 181499271 |
| 1 | 181476660 | 181557605 + | NM_146105    | Cnst          | 44539  | 181521199 | 181521399 |
| 1 | 181675035 | 181734147 - | NM_026375    | Ahctf1        | 0      | 181733970 | 181734170 |
| 1 | 181891220 | 182095734 + | NM_001033285 | Cdc42bpa      | 173806 | 182065026 | 182065226 |
| 1 | 181891220 | 182095734 + | NM_001033285 | Cdc42bpa      | 167173 | 182058393 | 182058593 |
| 1 | 182919687 | 182947627 - | NM_010145    | Ephx1         | 3581   | 182943846 | 182944046 |
| 1 | 183282759 | 183390773 + | NM_001160211 | Cnih3         | 4785   | 183287544 | 183287744 |
| 1 | 183282759 | 183390773 + | NM_001160211 | Cnih3         | -327   | 183282232 | 183282432 |
| 1 | 183282759 | 183390773 + | NM_001160212 | Cnih3         | 4785   | 183287544 | 183287744 |
| 1 | 183282759 | 183390773 + | NM_001160212 | Cnih3         | -327   | 183282232 | 183282432 |
| 1 | 183282759 | 183390773 + | NM_028408    | Cnih3         | 4785   | 183287544 | 183287744 |
| 1 | 183282759 | 183390773 + | NM_028408    | Cnih3         | -327   | 183282232 | 183282432 |
| 1 | 184339298 | 184392568 + | NM_173378    | Trp53bp2      | 4546   | 184343844 | 184344044 |
| 1 | 184339298 | 184392568 + | NM_173378    | Trp53bp2      | -6878  | 184332220 | 184332420 |
| 1 | 185858340 | 185899516 + | NM_022019    | Dusp10        | 22861  | 185881201 | 185881401 |
| 1 | 185858340 | 185899516 + | NM_022019    | Dusp10        | 17299  | 185875639 | 185875839 |
| 1 | 186636947 | 186669727 - | NM_133684    | Marc2         | 9432   | 186660095 | 186660295 |
| 1 | 186636947 | 186669727 - | NM_133684    | Marc2         | -8175  | 186677902 | 186678102 |
| 1 | 186636947 | 186669727 - | NM_133684    | Marc2         | 18255  | 186651272 | 186651472 |
| 1 | 186646286 | 186646368 - | NR_035502    | Mir1981       | -4904  | 186651272 | 186651472 |
| 1 | 187028047 | 187110626 + | NM_001163754 | Rab3gap2      | 66370  | 187094417 | 187094617 |

|   |           |             |              |               |        |           |           |
|---|-----------|-------------|--------------|---------------|--------|-----------|-----------|
| 1 | 187028047 | 187110626 + | NM_001163754 | Rab3gap2      | 78713  | 187106760 | 187106960 |
| 1 | 187110541 | 187153281 - | NM_198653    | lars2         | 20081  | 187133000 | 187133200 |
| 1 | 187110541 | 187153281 - | NM_198653    | lars2         | -4434  | 187157715 | 187157915 |
| 1 | 187110541 | 187153281 - | NM_198653    | lars2         | 17210  | 187135871 | 187136071 |
| 1 | 187110541 | 187153281 - | NM_198653    | lars2         | 27633  | 187125448 | 187125648 |
| 1 | 187110541 | 187153281 - | NM_198653    | lars2         | 21448  | 187131633 | 187131833 |
| 1 | 187137198 | 187137265 + | NR_029580    | Mir194-1      | -3998  | 187133000 | 187133200 |
| 1 | 187137198 | 187137265 + | NR_029580    | Mir194-1      | -1127  | 187135871 | 187136071 |
| 1 | 187137198 | 187137265 + | NR_029580    | Mir194-1      | -5365  | 187131633 | 187131833 |
| 1 | 187137460 | 187137571 + | NR_029908    | Mir215        | -4260  | 187133000 | 187133200 |
| 1 | 187137460 | 187137571 + | NR_029908    | Mir215        | -1389  | 187135871 | 187136071 |
| 1 | 187137460 | 187137571 + | NR_029908    | Mir215        | -5627  | 187131633 | 187131833 |
| 1 | 187156038 | 187181649 + | NM_011794    | Bpnt1         | 1677   | 187157715 | 187157915 |
| 1 | 187253236 | 187265699 - | NR_038006    | 9630028B13Rik | 8423   | 187257076 | 187257276 |
| 1 | 187253236 | 187265699 - | NR_038006    | 9630028B13Rik | -9758  | 187275457 | 187275657 |
| 1 | 187253236 | 187265699 - | NR_038006    | 9630028B13Rik | 9646   | 187255853 | 187256053 |
| 1 | 187270995 | 187279448 - | NR_040305    | Gm2061        | 862    | 187278386 | 187278586 |
| 1 | 187270995 | 187279448 - | NR_040305    | Gm2061        | 3791   | 187275457 | 187275657 |
| 1 | 187278727 | 187292641 + | NM_001033286 | Slc30a10      | -141   | 187278386 | 187278586 |
| 1 | 187278727 | 187292641 + | NM_001033286 | Slc30a10      | -3070  | 187275457 | 187275657 |
| 1 | 188447065 | 188529872 - | NM_009367    | Tgfb2         | -7731  | 188537603 | 188537803 |
| 1 | 188872286 | 189039326 - | NM_028848    | Spata17       | -2282  | 189041608 | 189041808 |
| 1 | 188959172 | 189039326 - | NM_029067    | Spata17       | -2282  | 189041608 | 189041808 |
| 1 | 189039390 | 189175309 + | NM_026367    | Gpatch2       | 121966 | 189161356 | 189161556 |
| 1 | 189039390 | 189175309 + | NM_026367    | Gpatch2       | 2218   | 189041608 | 189041808 |
| 1 | 189432885 | 190038764 + | NM_001243792 | Esrrg         | 288074 | 189720959 | 189721159 |
| 1 | 189432885 | 190038764 + | NM_001243792 | Esrrg         | 217608 | 189650493 | 189650693 |
| 1 | 191031809 | 191226153 - | NM_001281848 | Kcnk2         | -1592  | 191227745 | 191227945 |
| 1 | 191552147 | 191700573 + | NM_008976    | Ptpn14        | 139314 | 191691461 | 191691661 |
| 1 | 191704371 | 191746168 - | NM_026796    | Smyd2         | 823    | 191745145 | 191745345 |

|   |           |             |              |               |        |           |           |
|---|-----------|-------------|--------------|---------------|--------|-----------|-----------|
| 1 | 192596758 | 192735650 - | NM_178775    | Rps6kc1       | -5813  | 192741463 | 192741663 |
| 1 | 192596758 | 192735650 - | NM_178775    | Rps6kc1       | -8374  | 192744024 | 192744224 |
| 1 | 192596758 | 192735650 - | NM_178775    | Rps6kc1       | -5097  | 192740747 | 192740947 |
| 1 | 192748987 | 192770371 + | NM_001199020 | Angel2        | -7324  | 192741463 | 192741663 |
| 1 | 192748987 | 192770371 + | NM_001199020 | Angel2        | -4763  | 192744024 | 192744224 |
| 1 | 192748987 | 192770371 + | NM_001199020 | Angel2        | -8040  | 192740747 | 192740947 |
| 1 | 192752384 | 192770371 + | NM_021421    | Angel2        | -8160  | 192744024 | 192744224 |
| 1 | 192752384 | 192770371 + | NR_037578    | Angel2        | -8160  | 192744024 | 192744224 |
| 1 | 192752384 | 192770371 + | NR_037579    | Angel2        | -8160  | 192744024 | 192744224 |
| 1 | 192771525 | 192802878 - | NM_144879    | Vash2         | -350   | 192803228 | 192803428 |
| 1 | 192771525 | 192803176 - | NR_027352    | Vash2         | -52    | 192803228 | 192803428 |
| 1 | 192829711 | 192850070 - | NM_001081259 | Mfsd7b        | -274   | 192850344 | 192850544 |
| 1 | 192829711 | 192850070 - | NM_001081259 | Mfsd7b        | 16974  | 192832896 | 192833096 |
| 1 | 192849230 | 192853661 + | NR_027298    | A230020J21Rik | 1114   | 192850344 | 192850544 |
| 1 | 192860701 | 192866821 + | NM_029336    | Spata45       | -99    | 192860402 | 192860602 |
| 1 | 192922293 | 192932823 + | NM_030060    | Batf3         | 4289   | 192926582 | 192926782 |
| 1 | 192994176 | 193007213 - | NM_007498    | Atf3          | 6080   | 193000933 | 193001133 |
| 1 | 193149844 | 193176805 + | NM_025864    | Tmem206       | 4838   | 193154682 | 193154882 |
| 1 | 193361235 | 193399424 - | NM_001305233 | Dtl           | 12632  | 193386592 | 193386792 |
| 1 | 193361235 | 193399424 - | NM_029766    | Dtl           | 12632  | 193386592 | 193386792 |
| 1 | 193541903 | 193608135 + | NM_172266    | Lpgat1        | 7439   | 193549342 | 193549542 |
| 1 | 193542274 | 193608135 + | NM_001134829 | Lpgat1        | 7068   | 193549342 | 193549542 |
| 1 | 193717951 | 193731407 - | NR_030669    | 1700034H15Rik | -7199  | 193738606 | 193738806 |
| 1 | 193821084 | 193916481 - | NM_011633    | Traf5         | 34196  | 193882085 | 193882285 |
| 1 | 194014659 | 194334042 + | NM_001038607 | Kcnh1         | 267130 | 194281789 | 194281989 |
| 1 | 194014659 | 194334042 + | NM_001038607 | Kcnh1         | 121002 | 194135661 | 194135861 |
| 1 | 194014659 | 194334042 + | NM_010600    | Kcnh1         | 267130 | 194281789 | 194281989 |
| 1 | 194014659 | 194334042 + | NM_010600    | Kcnh1         | 121002 | 194135661 | 194135861 |
| 1 | 194336710 | 194597414 - | NM_144881    | Hhat          | 59059  | 194538155 | 194538355 |
| 1 | 194336710 | 194597414 - | NM_144881    | Hhat          | 257368 | 194339846 | 194340046 |

|    |           |             |              |               |        |           |           |
|----|-----------|-------------|--------------|---------------|--------|-----------|-----------|
| 1  | 194336710 | 194597414 - | NM_144881    | Hhat          | 174763 | 194422451 | 194422651 |
| 1  | 194336710 | 194597414 - | NM_144881    | Hhat          | 258206 | 194339008 | 194339208 |
| 1  | 194930597 | 194956446 - | NM_145415    | Diexf         | -141   | 194956587 | 194956787 |
| 1  | 194979306 | 194998230 + | NM_016851    | Irf6          | 3218   | 194982524 | 194982724 |
| 1  | 194979306 | 194998230 + | NM_016851    | Irf6          | 7253   | 194986559 | 194986759 |
| 1  | 194979306 | 194998230 + | NM_016851    | Irf6          | 4021   | 194983327 | 194983527 |
| 1  | 196446023 | 196643063 + | NM_008882    | Plxna2        | 141387 | 196587410 | 196587610 |
| 1  | 196446023 | 196643063 + | NM_008882    | Plxna2        | 40618  | 196486641 | 196486841 |
| 1  | 196446023 | 196643063 + | NM_008882    | Plxna2        | 64890  | 196510913 | 196511113 |
| 1  | 196446023 | 196643063 + | NM_008882    | Plxna2        | 65984  | 196512007 | 196512207 |
| 1  | 196446023 | 196643063 + | NM_008882    | Plxna2        | 56110  | 196502133 | 196502333 |
| 1  | 196446023 | 196643063 + | NM_008882    | Plxna2        | 1373   | 196447396 | 196447596 |
| 1  | 196446023 | 196643063 + | NM_008882    | Plxna2        | 20049  | 196466072 | 196466272 |
| 1  | 196781953 | 196803154 - | NR_033564    | Gm16897       | -6466  | 196809620 | 196809820 |
| 1  | 196843593 | 196864103 + | NR_015566    | A330023F24Rik | -4555  | 196838838 | 196839038 |
| 1  | 196868094 | 196918443 - | NM_010778    | Cd46          | -8552  | 196926995 | 196927195 |
| 10 | 3134304   | 3227480 +   | NM_172546    | Cnksr3        | 80262  | 3214566   | 3214766   |
| 10 | 3134304   | 3227480 +   | NM_172546    | Cnksr3        | 71964  | 3206268   | 3206468   |
| 10 | 6379239   | 6606165 -   | NM_001159942 | Plekhg1       | 46707  | 6559258   | 6559458   |
| 10 | 6379239   | 6606165 -   | NM_001159942 | Plekhg1       | 37448  | 6568517   | 6568717   |
| 10 | 6379239   | 6606165 -   | NM_001159942 | Plekhg1       | 2565   | 6603400   | 6603600   |
| 10 | 6379239   | 6606165 -   | NM_001159942 | Plekhg1       | 9303   | 6596662   | 6596862   |
| 10 | 6379239   | 6606165 -   | NM_001159942 | Plekhg1       | 45681  | 6560284   | 6560484   |
| 10 | 6379239   | 6606165 -   | NM_001159942 | Plekhg1       | 46250  | 6559715   | 6559915   |
| 10 | 6379239   | 6606165 -   | NM_001159942 | Plekhg1       | 105506 | 6500459   | 6500659   |
| 10 | 6379239   | 6606165 -   | NM_001159942 | Plekhg1       | 83994  | 6521971   | 6522171   |
| 10 | 6379239   | 6606165 -   | NM_001159942 | Plekhg1       | 85859  | 6520106   | 6520306   |
| 10 | 6881566   | 6980392 -   | NM_133485    | Ppp1r14c      | 10475  | 6969717   | 6969917   |
| 10 | 7398769   | 7400957 -   | NR_033219    | BC020402      | -5028  | 7405985   | 7406185   |
| 10 | 7398769   | 7400957 -   | NR_033219    | BC020402      | -5826  | 7406783   | 7406983   |

|    |          |            |              |         |        |          |          |
|----|----------|------------|--------------|---------|--------|----------|----------|
| 10 | 7401007  | 7436260 +  | NM_010690    | Lats1   | 4978   | 7405985  | 7406185  |
| 10 | 7401007  | 7436260 +  | NM_010690    | Lats1   | 5776   | 7406783  | 7406983  |
| 10 | 7512692  | 7542362 +  | NM_026141    | Ppil4   | -124   | 7512368  | 7512568  |
| 10 | 7552268  | 7590196 +  | NM_172785    | Zc3h12d | 29441  | 7581709  | 7581909  |
| 10 | 7552268  | 7590196 +  | NM_172785    | Zc3h12d | 7067   | 7559335  | 7559535  |
| 10 | 7552268  | 7590196 +  | NM_172785    | Zc3h12d | 22     | 7552290  | 7552490  |
| 10 | 7556179  | 7556273 +  | NR_039563    | Mir5104 | -3689  | 7552290  | 7552490  |
| 10 | 8442017  | 8605869 -  | NM_175155    | Sash1   | -6233  | 8612102  | 8612302  |
| 10 | 9475345  | 9620839 -  | NM_001081344 | Stxbp5  | 30277  | 9590362  | 9590562  |
| 10 | 9475345  | 9620839 -  | NM_001081344 | Stxbp5  | 140626 | 9480013  | 9480213  |
| 10 | 9475345  | 9620839 -  | NM_001081344 | Stxbp5  | 106282 | 9514357  | 9514557  |
| 10 | 12101986 | 12581534 - | NM_011682    | Utrn    | -5781  | 12587315 | 12587515 |
| 10 | 12101986 | 12581534 - | NM_011682    | Utrn    | -9031  | 12590565 | 12590765 |
| 10 | 12101986 | 12581534 - | NM_011682    | Utrn    | 7119   | 12574215 | 12574415 |
| 10 | 12101986 | 12581534 - | NM_011682    | Utrn    | 40020  | 12541314 | 12541514 |
| 10 | 12810594 | 12851502 + | NM_009538    | Plagl1  | 11901  | 12822495 | 12822695 |
| 10 | 12898444 | 12912944 - | NM_181470    | Ltv1    | 3023   | 12909721 | 12909921 |
| 10 | 12927523 | 13043967 - | NM_001033257 | Phactr2 | 92501  | 12951266 | 12951466 |
| 10 | 12927523 | 13194203 - | NM_001195065 | Phactr2 | 5165   | 13188838 | 13189038 |
| 10 | 12927523 | 13194203 - | NM_001195065 | Phactr2 | 242737 | 12951266 | 12951466 |
| 10 | 12927523 | 13108777 - | NM_001195066 | Phactr2 | 157311 | 12951266 | 12951466 |
| 10 | 12927523 | 13043967 - | NM_001195096 | Phactr2 | 92501  | 12951266 | 12951466 |
| 10 | 13686185 | 13871185 + | NM_010437    | Hivep2  | 20313  | 13706498 | 13706698 |
| 10 | 16670900 | 16815589 - | NR_038020    | Gm20125 | 22565  | 16792824 | 16793024 |
| 10 | 17775746 | 17844962 + | NM_001111065 | Reps1   | 19819  | 17795565 | 17795765 |
| 10 | 17775746 | 17844962 + | NM_009048    | Reps1   | 19819  | 17795565 | 17795765 |
| 10 | 17848828 | 17930697 - | NM_001195036 | Ect2l   | 18821  | 17911676 | 17911876 |
| 10 | 18127481 | 18253698 + | NM_173390    | Nhsl1   | 83900  | 18211381 | 18211581 |
| 10 | 18127481 | 18253698 + | NM_173390    | Nhsl1   | 84356  | 18211837 | 18212037 |
| 10 | 18127481 | 18253698 + | NM_173390    | Nhsl1   | 55583  | 18183064 | 18183264 |

|    |          |            |              |         |        |          |          |
|----|----------|------------|--------------|---------|--------|----------|----------|
| 10 | 18127481 | 18253698 + | NM_173390    | Nhsl1   | 65957  | 18193438 | 18193638 |
| 10 | 18127481 | 18253698 + | NM_173390    | Nhsl1   | 59680  | 18187161 | 18187361 |
| 10 | 18189787 | 18253698 + | NM_001163592 | Nhsl1   | 21594  | 18211381 | 18211581 |
| 10 | 18189787 | 18253698 + | NM_001163592 | Nhsl1   | 22050  | 18211837 | 18212037 |
| 10 | 18189787 | 18253698 + | NM_001163592 | Nhsl1   | -6523  | 18183064 | 18183264 |
| 10 | 18189787 | 18253698 + | NM_001163592 | Nhsl1   | 3651   | 18193438 | 18193638 |
| 10 | 18189787 | 18253698 + | NM_001163592 | Nhsl1   | -2426  | 18187161 | 18187361 |
| 10 | 18307817 | 18463565 - | NM_001033258 | Arfgef3 | 138323 | 18325042 | 18325242 |
| 10 | 18720717 | 18731770 - | NM_001166402 | Tnfaip3 | 3444   | 18728126 | 18728326 |
| 10 | 18720717 | 18731770 - | NM_001166402 | Tnfaip3 | -6114  | 18737884 | 18738084 |
| 10 | 18720717 | 18735217 - | NM_009397    | Tnfaip3 | 6891   | 18728126 | 18728326 |
| 10 | 18720717 | 18735217 - | NM_009397    | Tnfaip3 | -2667  | 18737884 | 18738084 |
| 10 | 18861555 | 18927754 + | NR_038021    | Gm20139 | 35843  | 18897398 | 18897598 |
| 10 | 18861555 | 18927754 + | NR_038021    | Gm20139 | 43696  | 18905251 | 18905451 |
| 10 | 18861555 | 18927754 + | NR_038021    | Gm20139 | 20498  | 18882053 | 18882253 |
| 10 | 18861555 | 18927754 + | NR_038021    | Gm20139 | 16141  | 18877696 | 18877896 |
| 10 | 18887044 | 18927754 + | NR_038022    | Gm20139 | 10354  | 18897398 | 18897598 |
| 10 | 18887044 | 18927754 + | NR_038022    | Gm20139 | 18207  | 18905251 | 18905451 |
| 10 | 18887044 | 18927754 + | NR_038022    | Gm20139 | -4791  | 18882053 | 18882253 |
| 10 | 18887044 | 18927754 + | NR_038022    | Gm20139 | -9148  | 18877696 | 18877896 |
| 10 | 19311764 | 19330032 + | NM_010511    | Ifngr1  | -2034  | 19309530 | 19309730 |
| 10 | 19579896 | 19627481 - | NM_001161825 | Pex7    | -7691  | 19635172 | 19635372 |
| 10 | 19579896 | 19627481 - | NM_008822    | Pex7    | -7691  | 19635172 | 19635372 |
| 10 | 19654332 | 19862557 + | NM_008580    | Map3k5  | 4775   | 19659107 | 19659307 |
| 10 | 19654332 | 19862557 + | NM_008580    | Map3k5  | 199259 | 19853591 | 19853791 |
| 10 | 19654332 | 19862557 + | NM_008580    | Map3k5  | 19695  | 19674027 | 19674227 |
| 10 | 19868726 | 20001397 + | NM_001198635 | Map7    | 16725  | 19885451 | 19885651 |
| 10 | 19868726 | 20001397 + | NM_001198635 | Map7    | 35319  | 19904045 | 19904245 |
| 10 | 19868726 | 20001397 + | NM_008635    | Map7    | 16725  | 19885451 | 19885651 |
| 10 | 19868726 | 20001397 + | NM_008635    | Map7    | 35319  | 19904045 | 19904245 |

|    |          |            |              |               |        |          |          |
|----|----------|------------|--------------|---------------|--------|----------|----------|
| 10 | 20032275 | 20062308 + | NM_001025392 | Bclaf1        | -1091  | 20030984 | 20031184 |
| 10 | 20032275 | 20062308 + | NM_001025393 | Bclaf1        | -1091  | 20030984 | 20031184 |
| 10 | 20032275 | 20062308 + | NM_153787    | Bclaf1        | -1091  | 20030984 | 20031184 |
| 10 | 20117810 | 20444875 - | NM_013875    | Pde7b         | 125924 | 20318751 | 20318951 |
| 10 | 20117810 | 20444875 - | NM_013875    | Pde7b         | 103263 | 20341412 | 20341612 |
| 10 | 21015785 | 21088696 + | NM_001042593 | Hbs1l         | 38675  | 21054460 | 21054660 |
| 10 | 21015785 | 21088696 + | NM_019702    | Hbs1l         | 38675  | 21054460 | 21054660 |
| 10 | 21038894 | 21061862 - | NR_045352    | 4930455C13Rik | 7202   | 21054460 | 21054660 |
| 10 | 21097106 | 21116385 + | NM_178713    | Aldh8a1       | 5746   | 21102852 | 21103052 |
| 10 | 21410651 | 21413785 + | NR_045843    | Gm5420        | -3213  | 21407238 | 21407438 |
| 10 | 21601990 | 21719709 + | NM_001161845 | Sgk1          | 112605 | 21714595 | 21714795 |
| 10 | 21698478 | 21719709 + | NM_001161847 | Sgk1          | 16117  | 21714595 | 21714795 |
| 10 | 21705910 | 21719709 + | NM_001161848 | Sgk1          | 8685   | 21714595 | 21714795 |
| 10 | 21712029 | 21719709 + | NM_001161849 | Sgk1          | 2566   | 21714595 | 21714795 |
| 10 | 21713696 | 21719709 + | NM_001161850 | Sgk1          | 899    | 21714595 | 21714795 |
| 10 | 21714472 | 21719709 + | NM_011361    | Sgk1          | 123    | 21714595 | 21714795 |
| 10 | 21832856 | 21869077 - | NM_001254744 | E030030I06Rik | 6295   | 21862582 | 21862782 |
| 10 | 22423683 | 22451254 - | NM_011603    | Tbpl1         | 19539  | 22431515 | 22431715 |
| 10 | 22823974 | 23069710 - | NM_010167    | Eya4          | 74764  | 22994746 | 22994946 |
| 10 | 22823974 | 23069710 - | NM_010167    | Eya4          | 75482  | 22994028 | 22994228 |
| 10 | 22823974 | 23069710 - | NM_010167    | Eya4          | 197813 | 22871697 | 22871897 |
| 10 | 23504989 | 23507016 - | NM_011295    | Rps12         | -6351  | 23513367 | 23513567 |
| 10 | 23505153 | 23505258 - | NR_037680    | Snora33       | -8109  | 23513367 | 23513567 |
| 10 | 23505560 | 23505628 - | NR_037681    | Snord100      | -7739  | 23513367 | 23513567 |
| 10 | 23516792 | 23547775 + | NM_183116    | Slc18b1       | 15025  | 23531817 | 23532017 |
| 10 | 23516792 | 23547775 + | NM_183116    | Slc18b1       | -3225  | 23513367 | 23513567 |
| 10 | 23571268 | 23589650 + | NM_011979    | Vnn3          | -4404  | 23566664 | 23566864 |
| 10 | 23943323 | 24022590 + | NM_021509    | Moxd1         | 75120  | 24018443 | 24018643 |
| 10 | 24357720 | 24431966 - | NM_001308327 | Enpp1         | 73216  | 24358550 | 24358750 |
| 10 | 24357720 | 24431966 - | NM_001308329 | Enpp1         | 73216  | 24358550 | 24358750 |

|    |          |            |              |          |        |          |          |
|----|----------|------------|--------------|----------|--------|----------|----------|
| 10 | 24357720 | 24431966 - | NM_008813    | Enpp1    | 73216  | 24358550 | 24358750 |
| 10 | 24493620 | 24556002 - | NM_134005    | Enpp3    | 13958  | 24541844 | 24542044 |
| 10 | 24493620 | 24556002 - | NM_134005    | Enpp3    | 52292  | 24503510 | 24503710 |
| 10 | 24635013 | 24647277 - | NM_007482    | Arg1     | -1521  | 24648798 | 24648998 |
| 10 | 24888896 | 25018970 - | NM_018747    | Akap7    | 119104 | 24899666 | 24899866 |
| 10 | 24888896 | 25018970 - | NM_018747    | Akap7    | 27882  | 24990888 | 24991088 |
| 10 | 24888896 | 25018970 - | NM_018747    | Akap7    | 96942  | 24921828 | 24922028 |
| 10 | 25079604 | 25243325 + | NM_001199265 | Epb4.1l2 | 138503 | 25218107 | 25218307 |
| 10 | 25079604 | 25243325 + | NM_001199265 | Epb4.1l2 | 160197 | 25239801 | 25240001 |
| 10 | 25128174 | 25243325 + | NM_013511    | Epb4.1l2 | 89933  | 25218107 | 25218307 |
| 10 | 25128174 | 25243325 + | NM_013511    | Epb4.1l2 | 111627 | 25239801 | 25240001 |
| 10 | 25247749 | 25256079 - | NM_001195596 | Smlr1    | -4945  | 25261024 | 25261224 |
| 10 | 25247749 | 25256079 - | NM_001195596 | Smlr1    | -3713  | 25259792 | 25259992 |
| 10 | 25995258 | 26094992 - | NM_172787    | L3mbtl3  | -580   | 26095572 | 26095772 |
| 10 | 25995258 | 26094992 - | NM_172787    | L3mbtl3  | 54264  | 26040528 | 26040728 |
| 10 | 26492318 | 26638455 + | NM_176837    | Arhgap18 | 47938  | 26540256 | 26540456 |
| 10 | 26492318 | 26638455 + | NM_176837    | Arhgap18 | 26965  | 26519283 | 26519483 |
| 10 | 26492318 | 26638455 + | NM_176837    | Arhgap18 | 928    | 26493246 | 26493446 |
| 10 | 26701092 | 27336749 - | NM_008481    | Lama2    | 615130 | 26721419 | 26721619 |
| 10 | 26701092 | 27336749 - | NM_008481    | Lama2    | 620036 | 26716513 | 26716713 |
| 10 | 27794626 | 28317204 + | NM_008983    | Ptprk    | 44299  | 27838925 | 27839125 |
| 10 | 27794626 | 28317204 + | NM_008983    | Ptprk    | 159956 | 27954582 | 27954782 |
| 10 | 27794626 | 28317204 + | NM_008983    | Ptprk    | 412721 | 28207347 | 28207547 |
| 10 | 27794626 | 28317204 + | NM_008983    | Ptprk    | 387890 | 28182516 | 28182716 |
| 10 | 27794626 | 28317204 + | NM_008983    | Ptprk    | 91828  | 27886454 | 27886654 |
| 10 | 27794626 | 28317204 + | NM_008983    | Ptprk    | 153029 | 27947655 | 27947855 |
| 10 | 27794626 | 28317204 + | NM_008983    | Ptprk    | 44785  | 27839411 | 27839611 |
| 10 | 29032972 | 29066468 + | NM_001110195 | Echdc1   | 8402   | 29041374 | 29041574 |
| 10 | 29033306 | 29066468 + | NM_025855    | Echdc1   | 8068   | 29041374 | 29041574 |
| 10 | 30328013 | 30338173 - | NM_025798    | Hint3    | 535    | 30337438 | 30337638 |



|    |          |            |              |               |        |          |          |
|----|----------|------------|--------------|---------------|--------|----------|----------|
| 10 | 30365388 | 30522914 - | NM_172495    | Ncoa7         | 15255  | 30507459 | 30507659 |
| 10 | 30365388 | 30522914 - | NM_172495    | Ncoa7         | 124352 | 30398362 | 30398562 |
| 10 | 31052186 | 31165728 - | NM_009413    | Tpd52l1       | 64346  | 31101182 | 31101382 |
| 10 | 31221693 | 31329532 - | NM_001146349 | Rnf217        | 92271  | 31237061 | 31237261 |
| 10 | 34203206 | 34331037 + | NM_001159544 | Frk           | 0      | 34203077 | 34203277 |
| 10 | 34203206 | 34331037 + | NM_001159544 | Frk           | 58554  | 34261760 | 34261960 |
| 10 | 34203206 | 34331037 + | NM_001159544 | Frk           | 80226  | 34283432 | 34283632 |
| 10 | 34203206 | 34331037 + | NM_001159544 | Frk           | 69495  | 34272701 | 34272901 |
| 10 | 34203206 | 34331037 + | NM_001159544 | Frk           | 25318  | 34228524 | 34228724 |
| 10 | 34203206 | 34331037 + | NM_001159544 | Frk           | 27828  | 34231034 | 34231234 |
| 10 | 34203206 | 34331037 + | NM_001159544 | Frk           | 14948  | 34218154 | 34218354 |
| 10 | 34203206 | 34331037 + | NM_010237    | Frk           | 0      | 34203077 | 34203277 |
| 10 | 34203206 | 34331037 + | NM_010237    | Frk           | 58554  | 34261760 | 34261960 |
| 10 | 34203206 | 34331037 + | NM_010237    | Frk           | 80226  | 34283432 | 34283632 |
| 10 | 34203206 | 34331037 + | NM_010237    | Frk           | 69495  | 34272701 | 34272901 |
| 10 | 34203206 | 34331037 + | NM_010237    | Frk           | 25318  | 34228524 | 34228724 |
| 10 | 34203206 | 34331037 + | NM_010237    | Frk           | 27828  | 34231034 | 34231234 |
| 10 | 34203206 | 34331037 + | NM_010237    | Frk           | 14948  | 34218154 | 34218354 |
| 10 | 36226613 | 36554201 + | NM_001081208 | Hs3st5        | 48523  | 36275136 | 36275336 |
| 10 | 36226613 | 36554201 + | NM_001253355 | Hs3st5        | 48523  | 36275136 | 36275336 |
| 10 | 36226613 | 36554201 + | NM_001253356 | Hs3st5        | 48523  | 36275136 | 36275336 |
| 10 | 39341217 | 39451814 - | NR_038037    | E130307A14Rik | 47338  | 39404276 | 39404476 |
| 10 | 39612566 | 39619045 - | NR_033628    | AA474331      | -9706  | 39628751 | 39628951 |
| 10 | 39612566 | 39619045 - | NR_033628    | AA474331      | -8056  | 39627101 | 39627301 |
| 10 | 39666718 | 39679960 - | NM_001173500 | G630090E17Rik | 11394  | 39668366 | 39668566 |
| 10 | 39753341 | 39862061 - | NM_001114332 | Slc16a10      | 64355  | 39797506 | 39797706 |
| 10 | 39753341 | 39862061 - | NM_001114332 | Slc16a10      | 86184  | 39775677 | 39775877 |
| 10 | 39753341 | 39862061 - | NM_001114332 | Slc16a10      | 70868  | 39790993 | 39791193 |
| 10 | 39795208 | 39862061 - | NM_028247    | Slc16a10      | 64355  | 39797506 | 39797706 |
| 10 | 40069114 | 40203625 + | NM_001168304 | Cdk19         | -421   | 40068493 | 40068693 |

|    |          |            |              |         |        |          |          |
|----|----------|------------|--------------|---------|--------|----------|----------|
| 10 | 40069114 | 40203625 + | NM_001168304 | Cdk19   | 102704 | 40171818 | 40172018 |
| 10 | 40069114 | 40203625 + | NM_001168304 | Cdk19   | -7027  | 40061887 | 40062087 |
| 10 | 40069114 | 40203625 + | NM_001291816 | Cdk19   | -421   | 40068493 | 40068693 |
| 10 | 40069114 | 40203625 + | NM_001291816 | Cdk19   | 102704 | 40171818 | 40172018 |
| 10 | 40069114 | 40203625 + | NM_001291816 | Cdk19   | -7027  | 40061887 | 40062087 |
| 10 | 40069114 | 40203625 + | NM_001291817 | Cdk19   | -421   | 40068493 | 40068693 |
| 10 | 40069114 | 40203625 + | NM_001291817 | Cdk19   | 102704 | 40171818 | 40172018 |
| 10 | 40069114 | 40203625 + | NM_001291817 | Cdk19   | -7027  | 40061887 | 40062087 |
| 10 | 40069114 | 40203625 + | NM_198164    | Cdk19   | -421   | 40068493 | 40068693 |
| 10 | 40069114 | 40203625 + | NM_198164    | Cdk19   | 102704 | 40171818 | 40172018 |
| 10 | 40069114 | 40203625 + | NM_198164    | Cdk19   | -7027  | 40061887 | 40062087 |
| 10 | 41196120 | 41206837 + | NM_001164433 | Mical1  | -1951  | 41193969 | 41194169 |
| 10 | 41196120 | 41206837 + | NM_001164433 | Mical1  | -3879  | 41192041 | 41192241 |
| 10 | 41196120 | 41206837 + | NM_001164433 | Mical1  | -5270  | 41190650 | 41190850 |
| 10 | 41196120 | 41206837 + | NM_138315    | Mical1  | -1951  | 41193969 | 41194169 |
| 10 | 41196120 | 41206837 + | NM_138315    | Mical1  | -3879  | 41192041 | 41192241 |
| 10 | 41196120 | 41206837 + | NM_138315    | Mical1  | -5270  | 41190650 | 41190850 |
| 10 | 41258655 | 41326402 - | NM_001303469 | Ccdc162 | -2823  | 41329225 | 41329425 |
| 10 | 41258655 | 41326402 - | NM_001303469 | Ccdc162 | 2648   | 41323554 | 41323754 |
| 10 | 41258655 | 41326402 - | NM_001303469 | Ccdc162 | 19416  | 41306786 | 41306986 |
| 10 | 41530380 | 41628243 + | NM_001162908 | Sesn1   | 10589  | 41540969 | 41541169 |
| 10 | 41634797 | 41738189 - | NM_001034858 | Armc2   | 82937  | 41655052 | 41655252 |
| 10 | 41634797 | 41738189 - | NM_001034858 | Armc2   | 61504  | 41676485 | 41676685 |
| 10 | 41634797 | 41738189 - | NM_001034858 | Armc2   | 64634  | 41673355 | 41673555 |
| 10 | 41634797 | 41738189 - | NM_001034858 | Armc2   | 84501  | 41653488 | 41653688 |
| 10 | 41905592 | 41996549 - | NM_019740    | Foxo3   | 55945  | 41940404 | 41940604 |
| 10 | 41905592 | 41996549 - | NM_019740    | Foxo3   | 6072   | 41990277 | 41990477 |
| 10 | 41905592 | 41996549 - | NM_019740    | Foxo3   | 41067  | 41955282 | 41955482 |
| 10 | 41905592 | 41996549 - | NM_019740    | Foxo3   | 46353  | 41949996 | 41950196 |
| 10 | 41905592 | 41996549 - | NM_019740    | Foxo3   | 86631  | 41909718 | 41909918 |

|    |          |            |              |               |        |          |          |
|----|----------|------------|--------------|---------------|--------|----------|----------|
| 10 | 42221860 | 42255176 + | NM_017472    | Snx3          | 7991   | 42229851 | 42230051 |
| 10 | 42481302 | 42552321 + | NM_153055    | Sec63         | 24429  | 42505731 | 42505931 |
| 10 | 42481302 | 42552321 + | NM_153055    | Sec63         | 3944   | 42485246 | 42485446 |
| 10 | 42580318 | 42680589 + | NM_172938    | Scml4         | 82480  | 42662798 | 42662998 |
| 10 | 42580318 | 42680589 + | NM_172938    | Scml4         | 79771  | 42660089 | 42660289 |
| 10 | 42941292 | 43184689 + | NM_001168289 | Pdss2         | 219699 | 43160991 | 43161191 |
| 10 | 42941292 | 43184689 + | NM_001168289 | Pdss2         | 24294  | 42965586 | 42965786 |
| 10 | 42941292 | 43184689 + | NM_001168289 | Pdss2         | 56852  | 42998144 | 42998344 |
| 10 | 42941292 | 43184689 + | NM_001168289 | Pdss2         | 154392 | 43095684 | 43095884 |
| 10 | 42941292 | 43184689 + | NM_001168289 | Pdss2         | 91634  | 43032926 | 43033126 |
| 10 | 42941292 | 43184689 + | NM_001168289 | Pdss2         | 56134  | 42997426 | 42997626 |
| 10 | 42941292 | 43184689 + | NM_001168289 | Pdss2         | 36172  | 42977464 | 42977664 |
| 10 | 42941292 | 43184689 + | NM_001168289 | Pdss2         | 14811  | 42956103 | 42956303 |
| 10 | 42941292 | 43184689 + | NM_001168289 | Pdss2         | 0      | 42941150 | 42941350 |
| 10 | 42941292 | 43160055 + | NM_027772    | Pdss2         | 24294  | 42965586 | 42965786 |
| 10 | 42941292 | 43160055 + | NM_027772    | Pdss2         | 56852  | 42998144 | 42998344 |
| 10 | 42941292 | 43160055 + | NM_027772    | Pdss2         | 154392 | 43095684 | 43095884 |
| 10 | 42941292 | 43160055 + | NM_027772    | Pdss2         | 91634  | 43032926 | 43033126 |
| 10 | 42941292 | 43160055 + | NM_027772    | Pdss2         | 56134  | 42997426 | 42997626 |
| 10 | 42941292 | 43160055 + | NM_027772    | Pdss2         | 36172  | 42977464 | 42977664 |
| 10 | 42941292 | 43160055 + | NM_027772    | Pdss2         | 14811  | 42956103 | 42956303 |
| 10 | 42941292 | 43160055 + | NM_027772    | Pdss2         | 0      | 42941150 | 42941350 |
| 10 | 43244927 | 43260801 - | NM_026411    | 1700021F05Rik | 6684   | 43253917 | 43254117 |
| 10 | 43298975 | 43304072 + | NM_009846    | Cd24a         | 2232   | 43301207 | 43301407 |
| 10 | 43313233 | 43350720 + | NR_033558    | F830002L21Rik | -4382  | 43308651 | 43308851 |
| 10 | 43670113 | 43724653 - | NM_172393    | Aim1          | 26301  | 43698152 | 43698352 |
| 10 | 43670113 | 43724653 - | NM_172393    | Aim1          | 20800  | 43703653 | 43703853 |
| 10 | 43670113 | 43724653 - | NM_172393    | Aim1          | 42025  | 43682428 | 43682628 |
| 10 | 44787020 | 44878802 + | NM_011156    | Prep          | 62878  | 44849898 | 44850098 |
| 10 | 44787020 | 44878802 + | NM_011156    | Prep          | 2865   | 44789885 | 44790085 |

|    |          |            |              |          |        |          |          |
|----|----------|------------|--------------|----------|--------|----------|----------|
| 10 | 44787020 | 44878802 + | NM_011156    | Prep     | 3786   | 44790806 | 44791006 |
| 10 | 51765732 | 51915051 - | NM_011282    | Ros1     | 61603  | 51853248 | 51853448 |
| 10 | 51953425 | 52041184 + | NM_025705    | Dcbld1   | 8329   | 51961754 | 51961954 |
| 10 | 51953425 | 52041184 + | NM_025705    | Dcbld1   | -1165  | 51952060 | 51952260 |
| 10 | 51953425 | 52041184 + | NM_025705    | Dcbld1   | -1801  | 51951424 | 51951624 |
| 10 | 53625839 | 53795603 - | NM_008548    | Man1a    | 68175  | 53727228 | 53727428 |
| 10 | 53625839 | 53795603 - | NM_008548    | Man1a    | 68590  | 53726813 | 53727013 |
| 10 | 55734100 | 55948496 - | NM_001033385 | Tbc1d32  | 24787  | 55923509 | 55923709 |
| 10 | 58063536 | 58138445 - | NM_010100    | Edar     | 18045  | 58120200 | 58120400 |
| 10 | 58604375 | 58684596 - | NM_001024910 | Sept10   | -3595  | 58688191 | 58688391 |
| 10 | 58604375 | 58684596 - | NM_001024910 | Sept10   | 619    | 58683777 | 58683977 |
| 10 | 58604375 | 58684596 - | NM_001024910 | Sept10   | 68943  | 58615453 | 58615653 |
| 10 | 58626860 | 58684596 - | NM_001024911 | Sept10   | -3595  | 58688191 | 58688391 |
| 10 | 58626860 | 58684596 - | NM_001024911 | Sept10   | 619    | 58683777 | 58683977 |
| 10 | 58684670 | 58689182 + | NM_172939    | Sowahc   | 3521   | 58688191 | 58688391 |
| 10 | 58684670 | 58689182 + | NM_172939    | Sowahc   | -693   | 58683777 | 58683977 |
| 10 | 58866433 | 58884725 + | NM_023530    | Pla2g12b | 0      | 58866277 | 58866477 |
| 10 | 58885708 | 58904528 - | NM_010959    | Oit3     | 10763  | 58893565 | 58893765 |
| 10 | 58909732 | 59079441 - | NM_001033259 | Mcu      | -179   | 59079620 | 59079820 |
| 10 | 58909732 | 59079441 - | NM_001033259 | Mcu      | 40539  | 59038702 | 59038902 |
| 10 | 58909732 | 59079441 - | NM_001033259 | Mcu      | 29649  | 59049592 | 59049792 |
| 10 | 58909732 | 59079441 - | NM_001033259 | Mcu      | 37849  | 59041392 | 59041592 |
| 10 | 58909732 | 59079441 - | NM_001033259 | Mcu      | 139366 | 58939875 | 58940075 |
| 10 | 59165311 | 59326883 + | NM_001291442 | Micu1    | 154597 | 59319908 | 59320108 |
| 10 | 59165311 | 59326883 + | NM_001291443 | Micu1    | 154597 | 59319908 | 59320108 |
| 10 | 59165311 | 59326883 + | NM_144822    | Micu1    | 154597 | 59319908 | 59320108 |
| 10 | 59342339 | 59360765 + | NM_019965    | Dnajb12  | 2236   | 59344575 | 59344775 |
| 10 | 59412423 | 59414519 - | NM_029083    | Ddit4    | 2839   | 59411480 | 59411680 |
| 10 | 59465553 | 59562739 + | NM_026937    | Ascc1    | 33031  | 59498584 | 59498784 |
| 10 | 59466075 | 59562739 + | NM_001199187 | Ascc1    | 32509  | 59498584 | 59498784 |

|    |          |            |              |          |        |          |          |
|----|----------|------------|--------------|----------|--------|----------|----------|
| 10 | 59644276 | 59682009 - | NM_016803    | Chst3    | 32317  | 59649492 | 59649692 |
| 10 | 59765498 | 60159239 - | NM_001252635 | Cdh23    | 288062 | 59870977 | 59871177 |
| 10 | 59765498 | 60159239 - | NM_001252635 | Cdh23    | 216794 | 59942245 | 59942445 |
| 10 | 59765498 | 60159239 - | NM_001252635 | Cdh23    | 363459 | 59795580 | 59795780 |
| 10 | 59765498 | 60159239 - | NM_001252635 | Cdh23    | 367365 | 59791674 | 59791874 |
| 10 | 59765498 | 60159239 - | NM_023370    | Cdh23    | 288062 | 59870977 | 59871177 |
| 10 | 59765498 | 60159239 - | NM_023370    | Cdh23    | 216794 | 59942245 | 59942445 |
| 10 | 59765498 | 60159239 - | NM_023370    | Cdh23    | 363459 | 59795580 | 59795780 |
| 10 | 59765498 | 60159239 - | NM_023370    | Cdh23    | 367365 | 59791674 | 59791874 |
| 10 | 59765498 | 60159239 - | NR_045556    | Cdh23    | 288062 | 59870977 | 59871177 |
| 10 | 59765498 | 60159239 - | NR_045556    | Cdh23    | 216794 | 59942245 | 59942445 |
| 10 | 59765498 | 60159239 - | NR_045556    | Cdh23    | 363459 | 59795580 | 59795780 |
| 10 | 59765498 | 60159239 - | NR_045556    | Cdh23    | 367365 | 59791674 | 59791874 |
| 10 | 60225343 | 60294330 - | NM_029770    | Unc5b    | 36244  | 60257886 | 60258086 |
| 10 | 60225343 | 60294330 - | NM_029770    | Unc5b    | 4750   | 60289380 | 60289580 |
| 10 | 60225343 | 60294330 - | NM_029770    | Unc5b    | 63618  | 60230512 | 60230712 |
| 10 | 60552079 | 60557078 + | NM_025273    | Pcbd1    | -8543  | 60543336 | 60543536 |
| 10 | 60561390 | 60610414 - | NM_009163    | Sgpl1    | 31403  | 60578811 | 60579011 |
| 10 | 60561390 | 60610414 - | NM_009163    | Sgpl1    | 5183   | 60605031 | 60605231 |
| 10 | 60561390 | 60610414 - | NM_009163    | Sgpl1    | -1924  | 60612338 | 60612538 |
| 10 | 60561390 | 60610414 - | NM_009163    | Sgpl1    | 23840  | 60586374 | 60586574 |
| 10 | 60561390 | 60610414 - | NM_009163    | Sgpl1    | 15582  | 60594632 | 60594832 |
| 10 | 60561390 | 60610414 - | NM_009163    | Sgpl1    | 18648  | 60591566 | 60591766 |
| 10 | 60561390 | 60610414 - | NM_009163    | Sgpl1    | 24248  | 60585966 | 60586166 |
| 10 | 60561390 | 60610414 - | NM_009163    | Sgpl1    | 30786  | 60579428 | 60579628 |
| 10 | 60895245 | 60915418 - | NM_010124    | Eif4ebp2 | -1347  | 60916765 | 60916965 |
| 10 | 60938581 | 61044977 + | NM_153542    | Lrrc20   | 37428  | 60976009 | 60976209 |
| 10 | 61111369 | 61136914 + | NM_026438    | Ppa1     | 6340   | 61117709 | 61117909 |
| 10 | 61111369 | 61136914 + | NM_026438    | Ppa1     | 8366   | 61119735 | 61119935 |
| 10 | 61111369 | 61136914 + | NM_026438    | Ppa1     | -181   | 61110988 | 61111188 |

|    |          |            |              |         |        |          |          |
|----|----------|------------|--------------|---------|--------|----------|----------|
| 10 | 61111369 | 61136914 + | NM_026438    | Ppa1    | -1696  | 61109473 | 61109673 |
| 10 | 61648144 | 61693967 - | NM_197996    | Tspan15 | 1533   | 61692234 | 61692434 |
| 10 | 61648144 | 61693967 - | NM_197996    | Tspan15 | 14369  | 61679398 | 61679598 |
| 10 | 61648144 | 61693967 - | NM_197996    | Tspan15 | 2885   | 61690882 | 61691082 |
| 10 | 61648144 | 61693967 - | NM_197996    | Tspan15 | 9296   | 61684471 | 61684671 |
| 10 | 61648144 | 61693967 - | NM_197996    | Tspan15 | 38240  | 61655527 | 61655727 |
| 10 | 61656915 | 61656976 - | NR_106122    | Mir7662 | 1249   | 61655527 | 61655727 |
| 10 | 61845885 | 61885206 - | NM_145419    | Hkdc1   | 5790   | 61879216 | 61879416 |
| 10 | 61845885 | 61885206 - | NM_145419    | Hkdc1   | 8548   | 61876458 | 61876658 |
| 10 | 61957176 | 61970504 - | NM_011157    | Srgn    | -921   | 61971425 | 61971625 |
| 10 | 62042995 | 62065047 - | NM_019553    | Ddx21   | 11785  | 62053062 | 62053262 |
| 10 | 62122170 | 62188848 - | NM_001033260 | Stox1   | 57742  | 62130906 | 62131106 |
| 10 | 62487260 | 62521561 + | NM_026085    | Pbld2   | 15211  | 62502471 | 62502671 |
| 10 | 62524365 | 62540285 + | NM_026701    | Pbld1   | -963   | 62523202 | 62523402 |
| 10 | 62578543 | 62666701 - | NM_182992    | Mypn    | 47682  | 62618819 | 62619019 |
| 10 | 62578543 | 62666701 - | NM_182992    | Mypn    | 45494  | 62621007 | 62621207 |
| 10 | 66467823 | 66504075 + | NR_110511    | Gm31763 | 33033  | 66500856 | 66501056 |
| 10 | 66467823 | 66504075 + | NR_110511    | Gm31763 | 20707  | 66488530 | 66488730 |
| 10 | 66471937 | 66559737 - | NM_001204915 | Reep3   | 58681  | 66500856 | 66501056 |
| 10 | 66471937 | 66559737 - | NM_001204915 | Reep3   | -3922  | 66563659 | 66563859 |
| 10 | 66471937 | 66559737 - | NM_001204915 | Reep3   | 71007  | 66488530 | 66488730 |
| 10 | 66471937 | 66559737 - | NM_178606    | Reep3   | 58681  | 66500856 | 66501056 |
| 10 | 66471937 | 66559737 - | NM_178606    | Reep3   | -3922  | 66563659 | 66563859 |
| 10 | 66471937 | 66559737 - | NM_178606    | Reep3   | 71007  | 66488530 | 66488730 |
| 10 | 66590006 | 66719075 + | NM_207221    | Jmjd1c  | 8830   | 66598836 | 66599036 |
| 10 | 66590006 | 66719075 + | NM_207221    | Jmjd1c  | 27463  | 66617469 | 66617669 |
| 10 | 67558341 | 67741475 - | NM_023598    | Arid5b  | 30699  | 67710576 | 67710776 |
| 10 | 67558341 | 67741475 - | NM_023598    | Arid5b  | 28894  | 67712381 | 67712581 |
| 10 | 67558341 | 67741475 - | NM_023598    | Arid5b  | 152644 | 67588631 | 67588831 |
| 10 | 67558341 | 67741475 - | NM_023598    | Arid5b  | 150791 | 67590484 | 67590684 |

|    |          |            |              |               |        |          |          |
|----|----------|------------|--------------|---------------|--------|----------|----------|
| 10 | 67558341 | 67741475 - | NM_023598    | Arid5b        | 151411 | 67589864 | 67590064 |
| 10 | 67893704 | 68004624 - | NM_028491    | 1700040L02Rik | -8970  | 68013594 | 68013794 |
| 10 | 67893704 | 68004624 - | NM_028491    | 1700040L02Rik | -9513  | 68014137 | 68014337 |
| 10 | 68671300 | 68754533 + | NM_001252636 | Rhobtb1       | 10527  | 68681827 | 68682027 |
| 10 | 68671300 | 68754533 + | NM_001252636 | Rhobtb1       | -4502  | 68666598 | 68666798 |
| 10 | 68675405 | 68754533 + | NM_001081347 | Rhobtb1       | 6422   | 68681827 | 68682027 |
| 10 | 68675405 | 68754533 + | NM_001081347 | Rhobtb1       | -8607  | 68666598 | 68666798 |
| 10 | 68675942 | 68754533 + | NM_001252637 | Rhobtb1       | 5885   | 68681827 | 68682027 |
| 10 | 68675942 | 68754533 + | NM_001252637 | Rhobtb1       | -9144  | 68666598 | 68666798 |
| 10 | 68675942 | 68754533 + | NM_001252638 | Rhobtb1       | 5885   | 68681827 | 68682027 |
| 10 | 68675942 | 68754533 + | NM_001252638 | Rhobtb1       | -9144  | 68666598 | 68666798 |
| 10 | 68996456 | 69490185 + | NM_146005    | Ank3          | 390701 | 69387157 | 69387357 |
| 10 | 68996456 | 69490185 + | NM_146005    | Ank3          | 403328 | 69399784 | 69399984 |
| 10 | 68996456 | 69490185 + | NM_146005    | Ank3          | 393618 | 69390074 | 69390274 |
| 10 | 68996456 | 69490185 + | NM_146005    | Ank3          | 354680 | 69351136 | 69351336 |
| 10 | 68996456 | 69490185 + | NM_146005    | Ank3          | 376646 | 69373102 | 69373302 |
| 10 | 68996456 | 69490185 + | NM_146005    | Ank3          | 356092 | 69352548 | 69352748 |
| 10 | 68996456 | 69490185 + | NM_146005    | Ank3          | 339129 | 69335585 | 69335785 |
| 10 | 68996456 | 69490185 + | NM_146005    | Ank3          | 338839 | 69335295 | 69335495 |
| 10 | 68996456 | 69490185 + | NM_170688    | Ank3          | 390701 | 69387157 | 69387357 |
| 10 | 68996456 | 69490185 + | NM_170688    | Ank3          | 403328 | 69399784 | 69399984 |
| 10 | 68996456 | 69490185 + | NM_170688    | Ank3          | 393618 | 69390074 | 69390274 |
| 10 | 68996456 | 69490185 + | NM_170688    | Ank3          | 354680 | 69351136 | 69351336 |
| 10 | 68996456 | 69490185 + | NM_170688    | Ank3          | 376646 | 69373102 | 69373302 |
| 10 | 68996456 | 69490185 + | NM_170688    | Ank3          | 356092 | 69352548 | 69352748 |
| 10 | 68996456 | 69490185 + | NM_170688    | Ank3          | 339129 | 69335585 | 69335785 |
| 10 | 68996456 | 69490185 + | NM_170688    | Ank3          | 338839 | 69335295 | 69335495 |
| 10 | 68996456 | 69490185 + | NM_170689    | Ank3          | 390701 | 69387157 | 69387357 |
| 10 | 68996456 | 69490185 + | NM_170689    | Ank3          | 403328 | 69399784 | 69399984 |
| 10 | 68996456 | 69490185 + | NM_170689    | Ank3          | 393618 | 69390074 | 69390274 |

|    |          |            |           |      |        |          |          |
|----|----------|------------|-----------|------|--------|----------|----------|
| 10 | 68996456 | 69490185 + | NM_170689 | Ank3 | 354680 | 69351136 | 69351336 |
| 10 | 68996456 | 69490185 + | NM_170689 | Ank3 | 376646 | 69373102 | 69373302 |
| 10 | 68996456 | 69490185 + | NM_170689 | Ank3 | 356092 | 69352548 | 69352748 |
| 10 | 68996456 | 69490185 + | NM_170689 | Ank3 | 339129 | 69335585 | 69335785 |
| 10 | 68996456 | 69490185 + | NM_170689 | Ank3 | 338839 | 69335295 | 69335495 |
| 10 | 68996456 | 69490185 + | NM_170690 | Ank3 | 390701 | 69387157 | 69387357 |
| 10 | 68996456 | 69490185 + | NM_170690 | Ank3 | 403328 | 69399784 | 69399984 |
| 10 | 68996456 | 69490185 + | NM_170690 | Ank3 | 393618 | 69390074 | 69390274 |
| 10 | 68996456 | 69490185 + | NM_170690 | Ank3 | 354680 | 69351136 | 69351336 |
| 10 | 68996456 | 69490185 + | NM_170690 | Ank3 | 376646 | 69373102 | 69373302 |
| 10 | 68996456 | 69490185 + | NM_170690 | Ank3 | 356092 | 69352548 | 69352748 |
| 10 | 68996456 | 69490185 + | NM_170690 | Ank3 | 339129 | 69335585 | 69335785 |
| 10 | 68996456 | 69490185 + | NM_170690 | Ank3 | 338839 | 69335295 | 69335495 |
| 10 | 68996456 | 69490185 + | NM_170728 | Ank3 | 390701 | 69387157 | 69387357 |
| 10 | 68996456 | 69490185 + | NM_170728 | Ank3 | 403328 | 69399784 | 69399984 |
| 10 | 68996456 | 69490185 + | NM_170728 | Ank3 | 393618 | 69390074 | 69390274 |
| 10 | 68996456 | 69490185 + | NM_170728 | Ank3 | 354680 | 69351136 | 69351336 |
| 10 | 68996456 | 69490185 + | NM_170728 | Ank3 | 376646 | 69373102 | 69373302 |
| 10 | 68996456 | 69490185 + | NM_170728 | Ank3 | 356092 | 69352548 | 69352748 |
| 10 | 68996456 | 69490185 + | NM_170728 | Ank3 | 339129 | 69335585 | 69335785 |
| 10 | 68996456 | 69490185 + | NM_170728 | Ank3 | 338839 | 69335295 | 69335495 |
| 10 | 68996456 | 69490185 + | NM_170729 | Ank3 | 390701 | 69387157 | 69387357 |
| 10 | 68996456 | 69490185 + | NM_170729 | Ank3 | 403328 | 69399784 | 69399984 |
| 10 | 68996456 | 69490185 + | NM_170729 | Ank3 | 393618 | 69390074 | 69390274 |
| 10 | 68996456 | 69490185 + | NM_170729 | Ank3 | 354680 | 69351136 | 69351336 |
| 10 | 68996456 | 69490185 + | NM_170729 | Ank3 | 376646 | 69373102 | 69373302 |
| 10 | 68996456 | 69490185 + | NM_170729 | Ank3 | 356092 | 69352548 | 69352748 |
| 10 | 68996456 | 69490185 + | NM_170729 | Ank3 | 339129 | 69335585 | 69335785 |
| 10 | 68996456 | 69490185 + | NM_170729 | Ank3 | 338839 | 69335295 | 69335495 |
| 10 | 68996456 | 69490185 + | NM_170730 | Ank3 | 390701 | 69387157 | 69387357 |



|    |          |            |              |         |        |          |          |
|----|----------|------------|--------------|---------|--------|----------|----------|
| 10 | 68996456 | 69490185 + | NM_170730    | Ank3    | 403328 | 69399784 | 69399984 |
| 10 | 68996456 | 69490185 + | NM_170730    | Ank3    | 393618 | 69390074 | 69390274 |
| 10 | 68996456 | 69490185 + | NM_170730    | Ank3    | 354680 | 69351136 | 69351336 |
| 10 | 68996456 | 69490185 + | NM_170730    | Ank3    | 376646 | 69373102 | 69373302 |
| 10 | 68996456 | 69490185 + | NM_170730    | Ank3    | 356092 | 69352548 | 69352748 |
| 10 | 68996456 | 69490185 + | NM_170730    | Ank3    | 339129 | 69335585 | 69335785 |
| 10 | 68996456 | 69490185 + | NM_170730    | Ank3    | 338839 | 69335295 | 69335495 |
| 10 | 69388280 | 69490185 + | NM_009670    | Ank3    | -923   | 69387157 | 69387357 |
| 10 | 69388280 | 69490185 + | NM_009670    | Ank3    | 11504  | 69399784 | 69399984 |
| 10 | 69388280 | 69490185 + | NM_009670    | Ank3    | 1794   | 69390074 | 69390274 |
| 10 | 69388280 | 69490185 + | NM_170687    | Ank3    | -923   | 69387157 | 69387357 |
| 10 | 69388280 | 69490185 + | NM_170687    | Ank3    | 11504  | 69399784 | 69399984 |
| 10 | 69388280 | 69490185 + | NM_170687    | Ank3    | 1794   | 69390074 | 69390274 |
| 10 | 69559869 | 69655949 + | NM_001111121 | Ccdc6   | 24280  | 69584149 | 69584349 |
| 10 | 69559869 | 69655949 + | NM_001111121 | Ccdc6   | 43420  | 69603289 | 69603489 |
| 10 | 69559869 | 69655949 + | NM_001111121 | Ccdc6   | 14006  | 69573875 | 69574075 |
| 10 | 70793242 | 70807598 - | NM_134007    | Cisd1   | -4127  | 70811725 | 70811925 |
| 10 | 70793242 | 70807598 - | NM_134007    | Cisd1   | -5134  | 70812732 | 70812932 |
| 10 | 70810541 | 70848634 + | NM_027184    | lpmk    | 1184   | 70811725 | 70811925 |
| 10 | 70810541 | 70848634 + | NM_027184    | lpmk    | 28059  | 70838600 | 70838800 |
| 10 | 70810541 | 70848634 + | NM_027184    | lpmk    | 20462  | 70831003 | 70831203 |
| 10 | 70810541 | 70848634 + | NM_027184    | lpmk    | 2191   | 70812732 | 70812932 |
| 10 | 74523641 | 74647669 + | NM_001081412 | Bcr     | 83304  | 74606945 | 74607145 |
| 10 | 74523641 | 74647669 + | NM_001081412 | Bcr     | 105206 | 74628847 | 74629047 |
| 10 | 74523641 | 74647669 + | NM_001081412 | Bcr     | 69630  | 74593271 | 74593471 |
| 10 | 74523641 | 74647669 + | NM_001081412 | Bcr     | 72734  | 74596375 | 74596575 |
| 10 | 74523641 | 74647669 + | NM_001081412 | Bcr     | 70782  | 74594423 | 74594623 |
| 10 | 74523641 | 74647669 + | NM_001081412 | Bcr     | -1191  | 74522250 | 74522450 |
| 10 | 74523641 | 74647669 + | NM_001081412 | Bcr     | 33287  | 74556928 | 74557128 |
| 10 | 74674818 | 74775146 + | NM_153406    | Specc1l | 16994  | 74691812 | 74692012 |

|    |          |            |              |         |       |          |          |
|----|----------|------------|--------------|---------|-------|----------|----------|
| 10 | 74674818 | 74775146 + | NM_153406    | Specc1l | 34179 | 74708997 | 74709197 |
| 10 | 74674818 | 74775146 + | NM_153406    | Specc1l | -770  | 74673848 | 74674048 |
| 10 | 74675135 | 74775146 + | NM_001145826 | Specc1l | 16677 | 74691812 | 74692012 |
| 10 | 74675135 | 74775146 + | NM_001145826 | Specc1l | 33862 | 74708997 | 74709197 |
| 10 | 74675135 | 74775146 + | NM_001145826 | Specc1l | -1087 | 74673848 | 74674048 |
| 10 | 74814800 | 74815707 + | NR_033602    | Gm5779  | -9930 | 74804670 | 74804870 |
| 10 | 74869656 | 74904425 + | NM_133995    | Upb1    | 27244 | 74896900 | 74897100 |
| 10 | 74869656 | 74904425 + | NM_133995    | Upb1    | 5750  | 74875406 | 74875606 |
| 10 | 74969559 | 74980068 - | NM_175133    | Gucd1   | 2664  | 74977204 | 74977404 |
| 10 | 74969559 | 74980068 - | NM_175133    | Gucd1   | 899   | 74978969 | 74979169 |
| 10 | 74969559 | 74980068 - | NM_175133    | Gucd1   | 1678  | 74978190 | 74978390 |
| 10 | 74980787 | 74998186 + | NM_026095    | Snrpd3  | -3383 | 74977204 | 74977404 |
| 10 | 74980787 | 74998186 + | NM_026095    | Snrpd3  | -1618 | 74978969 | 74979169 |
| 10 | 74980787 | 74998186 + | NM_026095    | Snrpd3  | -2397 | 74978190 | 74978390 |
| 10 | 75012870 | 75023076 - | NM_198860    | Lrrc75b | -3629 | 75026705 | 75026905 |
| 10 | 75012870 | 75023076 - | NM_198860    | Lrrc75b | 1598  | 75021278 | 75021478 |
| 10 | 75031407 | 75048937 + | NM_001305992 | Ggt1    | -4502 | 75026705 | 75026905 |
| 10 | 75031407 | 75048937 + | NM_001305992 | Ggt1    | -9929 | 75021278 | 75021478 |
| 10 | 75036240 | 75048937 + | NM_008116    | Ggt1    | -9335 | 75026705 | 75026905 |
| 10 | 75108855 | 75227103 - | NM_172549    | Cabin1  | 80092 | 75146811 | 75147011 |
| 10 | 75359514 | 75384360 - | NM_001161853 | Smarcb1 | 24057 | 75360103 | 75360303 |
| 10 | 75359514 | 75384360 - | NM_011418    | Smarcb1 | 24057 | 75360103 | 75360303 |
| 10 | 75417259 | 75472335 + | NM_198635    | Gm5134  | -2468 | 75414591 | 75414791 |
| 10 | 75521366 | 75573764 - | NM_023219    | Slc5a4b | 1863  | 75571701 | 75571901 |
| 10 | 75521366 | 75573764 - | NM_023219    | Slc5a4b | 13298 | 75560266 | 75560466 |
| 10 | 75610196 | 75652011 + | NM_133184    | Slc5a4a | 10124 | 75620320 | 75620520 |
| 10 | 75610196 | 75652011 + | NM_133184    | Slc5a4a | -9305 | 75600691 | 75600891 |
| 10 | 75922312 | 75931860 - | NM_172550    | Ybey    | -142  | 75932002 | 75932202 |
| 10 | 75931716 | 75978603 + | NM_019434    | Mcm3ap  | 286   | 75932002 | 75932202 |
| 10 | 75994350 | 76019885 + | NM_146006    | Lss     | 22530 | 76016880 | 76017080 |

|    |          |            |              |               |       |          |          |
|----|----------|------------|--------------|---------------|-------|----------|----------|
| 10 | 76008616 | 76024972 - | NR_045354    | 4930483K19Rik | 7892  | 76016880 | 76017080 |
| 10 | 76025017 | 76032946 + | NM_029661    | Spatc1l       | -7937 | 76016880 | 76017080 |
| 10 | 76495484 | 76513178 + | NM_001199271 | Slc19a1       | -8200 | 76487084 | 76487284 |
| 10 | 76495957 | 76513178 + | NM_031196    | Slc19a1       | -8673 | 76487084 | 76487284 |
| 10 | 76514924 | 76576451 - | NM_001109991 | Col18a1       | 4625  | 76571626 | 76571826 |
| 10 | 76514924 | 76629276 - | NM_009929    | Col18a1       | 57450 | 76571626 | 76571826 |
| 10 | 76753472 | 76881019 - | NM_001024837 | Adarb1        | 82268 | 76798551 | 76798751 |
| 10 | 76753472 | 76881019 - | NM_001024837 | Adarb1        | 54749 | 76826070 | 76826270 |
| 10 | 76753472 | 76881019 - | NM_130895    | Adarb1        | 82268 | 76798551 | 76798751 |
| 10 | 76753472 | 76881019 - | NM_130895    | Adarb1        | 54749 | 76826070 | 76826270 |
| 10 | 76753472 | 76881019 - | NR_004429    | Adarb1        | 82268 | 76798551 | 76798751 |
| 10 | 76753472 | 76881019 - | NR_004429    | Adarb1        | 54749 | 76826070 | 76826270 |
| 10 | 76753472 | 76881019 - | NR_021486    | Adarb1        | 82268 | 76798551 | 76798751 |
| 10 | 76753472 | 76881019 - | NR_021486    | Adarb1        | 54749 | 76826070 | 76826270 |
| 10 | 76993093 | 77028420 + | NM_008404    | Itgb2         | -1372 | 76991521 | 76991721 |
| 10 | 77149314 | 77349515 + | NM_001287074 | Tspear        | -266  | 77148848 | 77149048 |
| 10 | 77449694 | 77472542 - | NM_008826    | Pfkl          | -9097 | 77481639 | 77481839 |
| 10 | 77649471 | 77707388 - | NM_001081055 | Trappc10      | 35466 | 77671722 | 77671922 |
| 10 | 77734308 | 77814446 - | NM_053014    | Agpat3        | 27853 | 77786393 | 77786593 |
| 10 | 77734308 | 77814446 - | NM_053014    | Agpat3        | 25248 | 77788998 | 77789198 |
| 10 | 77734308 | 77814446 - | NM_053014    | Agpat3        | 27482 | 77786764 | 77786964 |
| 10 | 78037245 | 78047248 + | NM_173751    | Ilvbl         | 589   | 78037834 | 78038034 |
| 10 | 78047248 | 78054710 - | NM_027875    | Syde1         | -2608 | 78057318 | 78057518 |
| 10 | 79167103 | 79174725 + | NM_001077184 | Bsg           | -5955 | 79160948 | 79161148 |
| 10 | 79167103 | 79174725 + | NM_009768    | Bsg           | -5955 | 79160948 | 79161148 |
| 10 | 79198870 | 79209327 - | NM_172551    | Polrmt        | 9612  | 79199515 | 79199715 |
| 10 | 79240019 | 79245376 + | NM_031380    | Fstl3         | 3673  | 79243692 | 79243892 |
| 10 | 79283766 | 79293198 + | NM_030218    | Misp          | 1993  | 79285759 | 79285959 |
| 10 | 79283766 | 79293198 + | NM_030218    | Misp          | 4903  | 79288669 | 79288869 |
| 10 | 79283766 | 79293198 + | NM_030218    | Misp          | 3521  | 79287287 | 79287487 |

|    |          |            |              |               |       |          |          |
|----|----------|------------|--------------|---------------|-------|----------|----------|
| 10 | 79314122 | 79317717 - | NR_029447    | E130317F20Rik | 1939  | 79315578 | 79315778 |
| 10 | 79317177 | 79327181 + | NM_001077363 | Ptbp1         | -1399 | 79315578 | 79315778 |
| 10 | 79317177 | 79327181 + | NM_001283013 | Ptbp1         | -1399 | 79315578 | 79315778 |
| 10 | 79317177 | 79327181 + | NM_008956    | Ptbp1         | -1399 | 79315578 | 79315778 |
| 10 | 79325332 | 79325398 + | NR_105875    | Mir6910       | -9554 | 79315578 | 79315778 |
| 10 | 79439865 | 79447076 - | NM_001003949 | Tmem259       | 354   | 79446522 | 79446722 |
| 10 | 79451345 | 79458146 + | NM_007725    | Cnn2          | -4623 | 79446522 | 79446722 |
| 10 | 79509911 | 79519185 + | NR_110342    | Gpx4          | 6556  | 79516467 | 79516667 |
| 10 | 79516233 | 79519185 + | NM_008162    | Gpx4          | 234   | 79516467 | 79516667 |
| 10 | 79516764 | 79519185 + | NM_001037741 | Gpx4          | -97   | 79516467 | 79516667 |
| 10 | 79578548 | 79591258 + | NM_001301853 | Stk11         | 1181  | 79579729 | 79579929 |
| 10 | 79578548 | 79591258 + | NM_001301853 | Stk11         | -1338 | 79577010 | 79577210 |
| 10 | 79578548 | 79593431 + | NM_001301854 | Stk11         | 1181  | 79579729 | 79579929 |
| 10 | 79578548 | 79593431 + | NM_001301854 | Stk11         | -1338 | 79577010 | 79577210 |
| 10 | 79578548 | 79593431 + | NM_011492    | Stk11         | 1181  | 79579729 | 79579929 |
| 10 | 79578548 | 79593431 + | NM_011492    | Stk11         | -1338 | 79577010 | 79577210 |
| 10 | 79578548 | 79593431 + | NR_126043    | Stk11         | 1181  | 79579729 | 79579929 |
| 10 | 79578548 | 79593431 + | NR_126043    | Stk11         | -1338 | 79577010 | 79577210 |
| 10 | 79593179 | 79600133 - | NM_001195268 | Cbap          | -9319 | 79609452 | 79609652 |
| 10 | 79593179 | 79602113 - | NR_036582    | Cbap          | -7339 | 79609452 | 79609652 |
| 10 | 79611017 | 79621114 + | NM_001305798 | Midn          | -1365 | 79609452 | 79609652 |
| 10 | 79611017 | 79621114 + | NM_021565    | Midn          | -1365 | 79609452 | 79609652 |
| 10 | 79612427 | 79621114 + | NM_001305799 | Midn          | -2775 | 79609452 | 79609652 |
| 10 | 79689343 | 79707890 + | NM_023431    | Mum1          | 375   | 79689718 | 79689918 |
| 10 | 79712197 | 79719538 + | NM_029272    | Ndufs7        | -3731 | 79708266 | 79708466 |
| 10 | 79720896 | 79723714 - | NM_010255    | Gamt          | -755  | 79724469 | 79724669 |
| 10 | 79727736 | 79751159 + | NM_001122604 | Dazap1        | -3067 | 79724469 | 79724669 |
| 10 | 79727736 | 79751159 + | NM_001122605 | Dazap1        | -3067 | 79724469 | 79724669 |
| 10 | 79727736 | 79751159 + | NM_133188    | Dazap1        | -3067 | 79724469 | 79724669 |
| 10 | 79781000 | 79783294 - | NM_025521    | 2310011J03Rik | -54   | 79783348 | 79783548 |

|    |          |            |              |          |       |          |          |
|----|----------|------------|--------------|----------|-------|----------|----------|
| 10 | 79784028 | 79792219 - | NM_008793    | Pcsk4    | -2717 | 79794936 | 79795136 |
| 10 | 79792890 | 79799187 + | NM_001204931 | Reep6    | 2046  | 79794936 | 79795136 |
| 10 | 79792890 | 79799187 + | NM_001204931 | Reep6    | -9342 | 79783348 | 79783548 |
| 10 | 79792890 | 79799187 + | NM_139292    | Reep6    | 2046  | 79794936 | 79795136 |
| 10 | 79792890 | 79799187 + | NM_139292    | Reep6    | -9342 | 79783348 | 79783548 |
| 10 | 79802538 | 79811194 - | NM_001285435 | Adamtsl5 | -3563 | 79814757 | 79814957 |
| 10 | 79802538 | 79811194 - | NM_001285435 | Adamtsl5 | 3932  | 79807062 | 79807262 |
| 10 | 79802538 | 79811194 - | NR_104339    | Adamtsl5 | -3563 | 79814757 | 79814957 |
| 10 | 79802538 | 79811194 - | NR_104339    | Adamtsl5 | 3932  | 79807062 | 79807262 |
| 10 | 79802538 | 79811194 - | NR_104340    | Adamtsl5 | -3563 | 79814757 | 79814957 |
| 10 | 79802538 | 79811194 - | NR_104340    | Adamtsl5 | 3932  | 79807062 | 79807262 |
| 10 | 79819204 | 79828235 + | NM_183152    | Plk5     | -4247 | 79814757 | 79814957 |
| 10 | 79871910 | 79896399 - | NM_001164147 | Tcf3     | 11595 | 79884604 | 79884804 |
| 10 | 79871910 | 79896399 - | NM_001164147 | Tcf3     | -229  | 79896628 | 79896828 |
| 10 | 79871910 | 79896399 - | NM_001164148 | Tcf3     | 11595 | 79884604 | 79884804 |
| 10 | 79871910 | 79896399 - | NM_001164148 | Tcf3     | -229  | 79896628 | 79896828 |
| 10 | 79871910 | 79896399 - | NM_001164149 | Tcf3     | 11595 | 79884604 | 79884804 |
| 10 | 79871910 | 79896399 - | NM_001164149 | Tcf3     | -229  | 79896628 | 79896828 |
| 10 | 79871910 | 79896399 - | NM_001164150 | Tcf3     | 11595 | 79884604 | 79884804 |
| 10 | 79871910 | 79896399 - | NM_001164150 | Tcf3     | -229  | 79896628 | 79896828 |
| 10 | 79871910 | 79896399 - | NM_001164151 | Tcf3     | 11595 | 79884604 | 79884804 |
| 10 | 79871910 | 79896399 - | NM_001164151 | Tcf3     | -229  | 79896628 | 79896828 |
| 10 | 79871910 | 79896399 - | NM_001164152 | Tcf3     | 11595 | 79884604 | 79884804 |
| 10 | 79871910 | 79896399 - | NM_001164152 | Tcf3     | -229  | 79896628 | 79896828 |
| 10 | 79871910 | 79896399 - | NM_001164153 | Tcf3     | 11595 | 79884604 | 79884804 |
| 10 | 79871910 | 79896399 - | NM_001164153 | Tcf3     | -229  | 79896628 | 79896828 |
| 10 | 79871910 | 79896399 - | NM_011548    | Tcf3     | 11595 | 79884604 | 79884804 |
| 10 | 79871910 | 79896399 - | NM_011548    | Tcf3     | -229  | 79896628 | 79896828 |
| 10 | 80003671 | 80024306 - | NM_025852    | Rexo1    | -199  | 80024505 | 80024705 |
| 10 | 80065625 | 80070400 + | NM_001100606 | Adat3    | 343   | 80065968 | 80066168 |

|    |          |            |              |           |       |          |          |
|----|----------|------------|--------------|-----------|-------|----------|----------|
| 10 | 80065627 | 80078529 + | NM_019575    | Scamp4    | 341   | 80065968 | 80066168 |
| 10 | 80072005 | 80072075 + | NR_105877    | Mir6912   | -5837 | 80065968 | 80066168 |
| 10 | 80105362 | 80119817 - | NM_145361    | Btbd2     | 229   | 80119388 | 80119588 |
| 10 | 80169723 | 80204957 - | NM_007460    | Ap3d1     | 11225 | 80193532 | 80193732 |
| 10 | 80217951 | 80257093 + | NM_199322    | Dot1l     | 6727  | 80224678 | 80224878 |
| 10 | 80217951 | 80257093 + | NM_199322    | Dot1l     | 5737  | 80223688 | 80223888 |
| 10 | 80258844 | 80261372 - | NM_023900    | Plekhj1   | -369  | 80261741 | 80261941 |
| 10 | 80261480 | 80267668 + | NM_013651    | Sf3a2     | 261   | 80261741 | 80261941 |
| 10 | 80267993 | 80270394 + | NM_007445    | Amh       | -6052 | 80261741 | 80261941 |
| 10 | 80364108 | 80380991 - | NM_010722    | Lmnb2     | 4135  | 80376656 | 80376856 |
| 10 | 80547078 | 80561618 - | NM_145365    | Creb3l3   | -4172 | 80565790 | 80565990 |
| 10 | 80547078 | 80561618 - | NM_145365    | Creb3l3   | -5161 | 80566779 | 80566979 |
| 10 | 80547078 | 80561618 - | NM_145365    | Creb3l3   | 3292  | 80558126 | 80558326 |
| 10 | 80547078 | 80561618 - | NM_145365    | Creb3l3   | 6037  | 80555381 | 80555581 |
| 10 | 80567359 | 80567419 - | NR_049186    | Mir5615-1 | 1429  | 80565790 | 80565990 |
| 10 | 80567359 | 80567419 - | NR_049186    | Mir5615-1 | 440   | 80566779 | 80566979 |
| 10 | 80567361 | 80567421 + | NR_049187    | Mir5615-2 | -1371 | 80565790 | 80565990 |
| 10 | 80567361 | 80567421 + | NR_049187    | Mir5615-2 | -382  | 80566779 | 80566979 |
| 10 | 80567361 | 80567421 + | NR_049187    | Mir5615-2 | -9035 | 80558126 | 80558326 |
| 10 | 80568692 | 80587443 + | NM_023138    | Map2k2    | -2702 | 80565790 | 80565990 |
| 10 | 80568692 | 80587443 + | NM_023138    | Map2k2    | -1713 | 80566779 | 80566979 |
| 10 | 80599016 | 80614403 + | NM_010731    | Zbtb7a    | 1060  | 80600076 | 80600276 |
| 10 | 80639376 | 80645255 + | NM_007907    | Eef2      | 2009  | 80641385 | 80641585 |
| 10 | 80641706 | 80641759 + | NR_028549    | Snord37   | -121  | 80641385 | 80641585 |
| 10 | 80645752 | 80655943 + | NM_001190474 | Dapk3     | -4167 | 80641385 | 80641585 |
| 10 | 80646008 | 80655943 + | NM_001190473 | Dapk3     | -4423 | 80641385 | 80641585 |
| 10 | 80646663 | 80655943 + | NM_007828    | Dapk3     | -5078 | 80641385 | 80641585 |
| 10 | 80667258 | 80693525 - | NM_178662    | Atcay     | -1970 | 80695495 | 80695695 |
| 10 | 80695908 | 80714869 + | NM_001034895 | Zfr2      | -213  | 80695495 | 80695695 |
| 10 | 80695908 | 80714869 + | NM_001034895 | Zfr2      | 15109 | 80711017 | 80711217 |

|    |          |            |              |         |       |          |          |
|----|----------|------------|--------------|---------|-------|----------|----------|
| 10 | 80715680 | 80725727 + | NM_001285855 | Matk    | -4463 | 80711017 | 80711217 |
| 10 | 80720044 | 80725727 + | NM_001285853 | Matk    | -8827 | 80711017 | 80711217 |
| 10 | 80720044 | 80725727 + | NM_001285854 | Matk    | -8827 | 80711017 | 80711217 |
| 10 | 80720044 | 80725727 + | NM_010768    | Matk    | -8827 | 80711017 | 80711217 |
| 10 | 80735933 | 80754327 - | NM_001282095 | Tjp3    | 0     | 80754225 | 80754425 |
| 10 | 80735933 | 80754327 - | NM_001282095 | Tjp3    | 4621  | 80749506 | 80749706 |
| 10 | 80735933 | 80748527 - | NM_001282096 | Tjp3    | -5698 | 80754225 | 80754425 |
| 10 | 80735933 | 80748527 - | NM_001282096 | Tjp3    | -979  | 80749506 | 80749706 |
| 10 | 80735933 | 80754013 - | NM_013769    | Tjp3    | -212  | 80754225 | 80754425 |
| 10 | 80735933 | 80754013 - | NM_013769    | Tjp3    | 4307  | 80749506 | 80749706 |
| 10 | 80755708 | 80782720 + | NM_001146687 | Pip5k1c | -1283 | 80754225 | 80754425 |
| 10 | 80755708 | 80782720 + | NM_001146687 | Pip5k1c | -6002 | 80749506 | 80749706 |
| 10 | 80755708 | 80782720 + | NM_001293646 | Pip5k1c | -1283 | 80754225 | 80754425 |
| 10 | 80755708 | 80782720 + | NM_001293646 | Pip5k1c | -6002 | 80749506 | 80749706 |
| 10 | 80755708 | 80782720 + | NM_001293647 | Pip5k1c | -1283 | 80754225 | 80754425 |
| 10 | 80755708 | 80782720 + | NM_001293647 | Pip5k1c | -6002 | 80749506 | 80749706 |
| 10 | 80755708 | 80782720 + | NM_008844    | Pip5k1c | -1283 | 80754225 | 80754425 |
| 10 | 80755708 | 80782720 + | NM_008844    | Pip5k1c | -6002 | 80749506 | 80749706 |
| 10 | 80783848 | 80788997 + | NM_027381    | Cactin  | -473  | 80783175 | 80783375 |
| 10 | 80791448 | 80797920 + | NM_001277265 | Tbxa2r  | -8073 | 80783175 | 80783375 |
| 10 | 80791448 | 80797920 + | NM_009325    | Tbxa2r  | -8073 | 80783175 | 80783375 |
| 10 | 80855809 | 80857825 + | NM_001099917 | Smim24  | -435  | 80855174 | 80855374 |
| 10 | 80965059 | 80986971 - | NM_010304    | Gna15   | -857  | 80987828 | 80988028 |
| 10 | 80991477 | 81007792 - | NM_010301    | Gna11   | -5111 | 81012903 | 81013103 |
| 10 | 80991477 | 81007792 - | NM_010301    | Gna11   | -1334 | 81009126 | 81009326 |
| 10 | 80991477 | 81007792 - | NM_010301    | Gna11   | 5962  | 81001630 | 81001830 |
| 10 | 81022189 | 81029117 + | NM_001276288 | Aes     | -9086 | 81012903 | 81013103 |
| 10 | 81022189 | 81029117 + | NM_001276288 | Aes     | -434  | 81021555 | 81021755 |
| 10 | 81022189 | 81029117 + | NM_010347    | Aes     | -9086 | 81012903 | 81013103 |
| 10 | 81022189 | 81029117 + | NM_010347    | Aes     | -434  | 81021555 | 81021755 |

|    |          |            |              |         |        |          |          |
|----|----------|------------|--------------|---------|--------|----------|----------|
| 10 | 81022189 | 81029117 + | NR_074087    | Aes     | -9086  | 81012903 | 81013103 |
| 10 | 81022189 | 81029117 + | NR_074087    | Aes     | -434   | 81021555 | 81021755 |
| 10 | 82113178 | 82153396 - | NM_029102    | Glt8d2  | 23890  | 82129306 | 82129506 |
| 10 | 82113178 | 82153396 - | NM_029102    | Glt8d2  | -8057  | 82161453 | 82161653 |
| 10 | 82161752 | 82204138 + | NM_001081218 | Hcfc2   | -99    | 82161453 | 82161653 |
| 10 | 82296696 | 82360470 + | NM_001042523 | Txnrd1  | 30557  | 82327253 | 82327453 |
| 10 | 82296696 | 82360470 + | NM_001042523 | Txnrd1  | 42511  | 82339207 | 82339407 |
| 10 | 82296696 | 82360470 + | NM_001042523 | Txnrd1  | 34573  | 82331269 | 82331469 |
| 10 | 82321951 | 82360470 + | NM_001042513 | Txnrd1  | 5302   | 82327253 | 82327453 |
| 10 | 82321951 | 82360470 + | NM_001042513 | Txnrd1  | 17256  | 82339207 | 82339407 |
| 10 | 82321951 | 82360470 + | NM_001042513 | Txnrd1  | 9318   | 82331269 | 82331469 |
| 10 | 82321951 | 82360470 + | NM_015762    | Txnrd1  | 5302   | 82327253 | 82327453 |
| 10 | 82321951 | 82360470 + | NM_015762    | Txnrd1  | 17256  | 82339207 | 82339407 |
| 10 | 82321951 | 82360470 + | NM_015762    | Txnrd1  | 9318   | 82331269 | 82331469 |
| 10 | 82323086 | 82360470 + | NM_001042514 | Txnrd1  | 4167   | 82327253 | 82327453 |
| 10 | 82323086 | 82360470 + | NM_001042514 | Txnrd1  | 16121  | 82339207 | 82339407 |
| 10 | 82323086 | 82360470 + | NM_001042514 | Txnrd1  | 8183   | 82331269 | 82331469 |
| 10 | 82329371 | 82330675 + | NM_025499    | Eid3    | -1918  | 82327253 | 82327453 |
| 10 | 82329371 | 82330675 + | NM_025499    | Eid3    | 1898   | 82331269 | 82331469 |
| 10 | 82448242 | 82658637 + | NM_021439    | Chst11  | 46693  | 82494935 | 82495135 |
| 10 | 82448242 | 82658637 + | NM_021439    | Chst11  | 134682 | 82582924 | 82583124 |
| 10 | 82448242 | 82658637 + | NM_021439    | Chst11  | 135476 | 82583718 | 82583918 |
| 10 | 82448242 | 82658637 + | NM_021439    | Chst11  | 133310 | 82581552 | 82581752 |
| 10 | 82448242 | 82658637 + | NM_021439    | Chst11  | 47035  | 82495277 | 82495477 |
| 10 | 82693884 | 82800563 - | NM_177388    | Slc41a2 | 14891  | 82785472 | 82785672 |
| 10 | 83989050 | 83996634 - | NM_175451    | Ckap4   | -8976  | 84005610 | 84005810 |
| 10 | 84085182 | 84189924 + | NM_027423    | Polr3b  | 26592  | 84111774 | 84111974 |
| 10 | 84218793 | 84369282 + | NM_001024918 | Rfx4    | 1546   | 84220339 | 84220539 |
| 10 | 84380358 | 84481083 + | NM_001013441 | Ric8b   | 91735  | 84472093 | 84472293 |
| 10 | 84380358 | 84481083 + | NM_001013441 | Ric8b   | 56531  | 84436889 | 84437089 |



|    |          |            |              |        |        |          |          |
|----|----------|------------|--------------|--------|--------|----------|----------|
| 10 | 84380358 | 84481083 + | NM_183172    | Ric8b  | 91735  | 84472093 | 84472293 |
| 10 | 84380358 | 84481083 + | NM_183172    | Ric8b  | 56531  | 84436889 | 84437089 |
| 10 | 85511491 | 85961642 - | NM_013722    | Syn3   | 155879 | 85805563 | 85805763 |
| 10 | 85511491 | 85961642 - | NM_013722    | Syn3   | 142124 | 85819318 | 85819518 |
| 10 | 85511491 | 85961642 - | NM_013722    | Syn3   | 145409 | 85816033 | 85816233 |
| 10 | 85511491 | 85961642 - | NM_013722    | Syn3   | 424934 | 85536508 | 85536708 |
| 10 | 85511491 | 85961642 - | NM_013722    | Syn3   | 158147 | 85803295 | 85803495 |
| 10 | 85511491 | 85961642 - | NM_013722    | Syn3   | 197567 | 85763875 | 85764075 |
| 10 | 85754338 | 85961642 - | NM_001164495 | Syn3   | 155879 | 85805563 | 85805763 |
| 10 | 85754338 | 85961642 - | NM_001164495 | Syn3   | 142124 | 85819318 | 85819518 |
| 10 | 85754338 | 85961642 - | NM_001164495 | Syn3   | 145409 | 85816033 | 85816233 |
| 10 | 85754338 | 85961642 - | NM_001164495 | Syn3   | 158147 | 85803295 | 85803495 |
| 10 | 85754338 | 85961642 - | NM_001164495 | Syn3   | 197567 | 85763875 | 85764075 |
| 10 | 85763157 | 85812251 + | NM_011595    | Timp3  | 42406  | 85805563 | 85805763 |
| 10 | 85763157 | 85812251 + | NM_011595    | Timp3  | 40138  | 85803295 | 85803495 |
| 10 | 85763157 | 85812251 + | NM_011595    | Timp3  | 718    | 85763875 | 85764075 |
| 10 | 86241750 | 86301135 + | NM_175331    | Nt5dc3 | -471   | 86241079 | 86241279 |
| 10 | 86241750 | 86301135 + | NM_175331    | Nt5dc3 | 42465  | 86284215 | 86284415 |
| 10 | 86241750 | 86301135 + | NM_175331    | Nt5dc3 | 35390  | 86277140 | 86277340 |
| 10 | 86984540 | 87046883 + | NM_008777    | Pah    | 36547  | 87021087 | 87021287 |
| 10 | 87842157 | 87910075 + | NM_001004164 | Gnptab | 660    | 87842817 | 87843017 |
| 10 | 87935558 | 87966716 - | NM_001146690 | Chpt1  | 786    | 87965730 | 87965930 |
| 10 | 87935558 | 87966716 - | NM_001146690 | Chpt1  | -8469  | 87975185 | 87975385 |
| 10 | 87935558 | 87966716 - | NM_001146690 | Chpt1  | -1353  | 87968069 | 87968269 |
| 10 | 87935558 | 87966716 - | NM_001146690 | Chpt1  | 8517   | 87957999 | 87958199 |
| 10 | 87935558 | 87966716 - | NR_027477    | Chpt1  | 786    | 87965730 | 87965930 |
| 10 | 87935558 | 87966716 - | NR_027477    | Chpt1  | -8469  | 87975185 | 87975385 |
| 10 | 87935558 | 87966716 - | NR_027477    | Chpt1  | -1353  | 87968069 | 87968269 |
| 10 | 87935558 | 87966716 - | NR_027477    | Chpt1  | 8517   | 87957999 | 87958199 |
| 10 | 87936221 | 87966716 - | NM_144807    | Chpt1  | 786    | 87965730 | 87965930 |

|    |          |            |              |               |        |          |          |
|----|----------|------------|--------------|---------------|--------|----------|----------|
| 10 | 87936221 | 87966716 - | NM_144807    | Chpt1         | -8469  | 87975185 | 87975385 |
| 10 | 87936221 | 87966716 - | NM_144807    | Chpt1         | -1353  | 87968069 | 87968269 |
| 10 | 87936221 | 87966716 - | NM_144807    | Chpt1         | 8517   | 87957999 | 87958199 |
| 10 | 87981024 | 88067898 - | NM_001252372 | Mybpc1        | 82093  | 87985605 | 87985805 |
| 10 | 87981024 | 88067898 - | NM_175418    | Mybpc1        | 82093  | 87985605 | 87985805 |
| 10 | 88194159 | 88205948 + | NM_025859    | Arl1          | -4184  | 88189775 | 88189975 |
| 10 | 88871568 | 88906713 - | NM_001033331 | Gas2l3        | 4344   | 88902169 | 88902369 |
| 10 | 88871568 | 88906713 - | NM_001079876 | Gas2l3        | 4344   | 88902169 | 88902369 |
| 10 | 88871568 | 88906713 - | NM_001284344 | Gas2l3        | 4344   | 88902169 | 88902369 |
| 10 | 88916979 | 88996368 - | NM_001163504 | Nr1h4         | 11587  | 88984581 | 88984781 |
| 10 | 88916979 | 88996368 - | NM_001163504 | Nr1h4         | 49569  | 88946599 | 88946799 |
| 10 | 88916979 | 88996368 - | NM_001163504 | Nr1h4         | 24661  | 88971507 | 88971707 |
| 10 | 88916979 | 88996368 - | NM_001163504 | Nr1h4         | 41012  | 88955156 | 88955356 |
| 10 | 88916979 | 88969404 - | NM_001163700 | Nr1h4         | 22605  | 88946599 | 88946799 |
| 10 | 88916979 | 88969404 - | NM_001163700 | Nr1h4         | -2103  | 88971507 | 88971707 |
| 10 | 88916979 | 88969404 - | NM_001163700 | Nr1h4         | 14048  | 88955156 | 88955356 |
| 10 | 88916979 | 88969404 - | NM_009108    | Nr1h4         | 22605  | 88946599 | 88946799 |
| 10 | 88916979 | 88969404 - | NM_009108    | Nr1h4         | -2103  | 88971507 | 88971707 |
| 10 | 88916979 | 88969404 - | NM_009108    | Nr1h4         | 14048  | 88955156 | 88955356 |
| 10 | 89036765 | 89062561 - | NM_001310710 | Slc17a8       | 5193   | 89057168 | 89057368 |
| 10 | 89036765 | 89083995 - | NM_182959    | Slc17a8       | 26627  | 89057168 | 89057368 |
| 10 | 89036765 | 89083995 - | NM_182959    | Slc17a8       | 2821   | 89080974 | 89081174 |
| 10 | 89102852 | 89149031 - | NM_001310704 | Scyl2         | 6606   | 89142225 | 89142425 |
| 10 | 89102852 | 89149031 - | NM_198021    | Scyl2         | 6606   | 89142225 | 89142425 |
| 10 | 89149108 | 89163612 + | NR_130956    | 1500026H17Rik | -6683  | 89142225 | 89142425 |
| 10 | 89336254 | 90435730 + | NM_001128086 | Anks1b        | 966323 | 90302577 | 90302777 |
| 10 | 89336254 | 90435730 + | NM_001128086 | Anks1b        | 937284 | 90273538 | 90273738 |
| 10 | 90038472 | 90435730 + | NM_001177397 | Anks1b        | 264105 | 90302577 | 90302777 |
| 10 | 90038472 | 90435730 + | NM_001177397 | Anks1b        | 235066 | 90273538 | 90273738 |
| 10 | 90039436 | 90435730 + | NM_001177396 | Anks1b        | 263141 | 90302577 | 90302777 |

|    |          |            |              |         |        |          |          |
|----|----------|------------|--------------|---------|--------|----------|----------|
| 10 | 90039436 | 90435730 + | NM_001177396 | Anks1b  | 234102 | 90273538 | 90273738 |
| 10 | 90039436 | 90435730 + | NM_001177398 | Anks1b  | 263141 | 90302577 | 90302777 |
| 10 | 90039436 | 90435730 + | NM_001177398 | Anks1b  | 234102 | 90273538 | 90273738 |
| 10 | 90039436 | 90435730 + | NM_181398    | Anks1b  | 263141 | 90302577 | 90302777 |
| 10 | 90039436 | 90435730 + | NM_181398    | Anks1b  | 234102 | 90273538 | 90273738 |
| 10 | 90452056 | 90545489 - | NM_001042558 | Apaf1   | 22619  | 90522670 | 90522870 |
| 10 | 90452056 | 90545489 - | NM_001282947 | Apaf1   | 22619  | 90522670 | 90522870 |
| 10 | 90452056 | 90545489 - | NM_009684    | Apaf1   | 22619  | 90522670 | 90522870 |
| 10 | 92147490 | 92185164 - | NM_008682    | Nedd1   | 6910   | 92178054 | 92178254 |
| 10 | 92147490 | 92185164 - | NM_008682    | Nedd1   | -3170  | 92188334 | 92188534 |
| 10 | 92147490 | 92185164 - | NM_008682    | Nedd1   | -99    | 92185263 | 92185463 |
| 10 | 92916141 | 92947642 + | NM_008517    | Lta4h   | 1353   | 92917494 | 92917694 |
| 10 | 93103794 | 93208718 + | NM_021320    | Ntn4    | 41125  | 93144919 | 93145119 |
| 10 | 93103794 | 93208718 + | NM_021320    | Ntn4    | 89057  | 93192851 | 93193051 |
| 10 | 93136963 | 93146068 - | NR_038017    | Gm15915 | 949    | 93144919 | 93145119 |
| 10 | 93498746 | 93608085 + | NM_053072    | Fgd6    | 80339  | 93579085 | 93579285 |
| 10 | 93498746 | 93608085 + | NM_053072    | Fgd6    | 83092  | 93581838 | 93582038 |
| 10 | 93498746 | 93608085 + | NM_053072    | Fgd6    | 11925  | 93510671 | 93510871 |
| 10 | 93498746 | 93608085 + | NM_053072    | Fgd6    | 62280  | 93561026 | 93561226 |
| 10 | 93610676 | 93659960 + | NM_011629    | Nr2c1   | -123   | 93610353 | 93610553 |
| 10 | 93977602 | 94053700 + | NM_172051    | Tmcc3   | 68000  | 94045602 | 94045802 |
| 10 | 93977602 | 94053700 + | NM_172051    | Tmcc3   | 38347  | 94015949 | 94016149 |
| 10 | 93977602 | 94053700 + | NM_172051    | Tmcc3   | 66152  | 94043754 | 94043954 |
| 10 | 93977602 | 94053700 + | NM_172051    | Tmcc3   | 60017  | 94037619 | 94037819 |
| 10 | 93977602 | 94053700 + | NM_172051    | Tmcc3   | 36903  | 94014505 | 94014705 |
| 10 | 93977602 | 94053700 + | NM_172051    | Tmcc3   | 35158  | 94012760 | 94012960 |
| 10 | 94038002 | 94053700 + | NM_001168684 | Tmcc3   | 7600   | 94045602 | 94045802 |
| 10 | 94038002 | 94053700 + | NM_001168684 | Tmcc3   | 5752   | 94043754 | 94043954 |
| 10 | 94038002 | 94053700 + | NM_001168684 | Tmcc3   | -183   | 94037619 | 94037819 |
| 10 | 94039008 | 94053700 + | NM_177026    | Tmcc3   | 6594   | 94045602 | 94045802 |

|    |           |             |              |               |        |           |           |
|----|-----------|-------------|--------------|---------------|--------|-----------|-----------|
| 10 | 94039008  | 94053700 +  | NM_177026    | Tmcc3         | 4746   | 94043754  | 94043954  |
| 10 | 94039008  | 94053700 +  | NM_177026    | Tmcc3         | -1189  | 94037619  | 94037819  |
| 10 | 94136238  | 94151359 -  | NR_015524    | Cep83os       | -7792  | 94159151  | 94159351  |
| 10 | 94151535  | 94253082 +  | NM_029852    | Cep83         | 43548  | 94195083  | 94195283  |
| 10 | 94151535  | 94253082 +  | NM_029852    | Cep83         | 7616   | 94159151  | 94159351  |
| 10 | 94253612  | 94407213 -  | NM_018797    | Plxnc1        | 52023  | 94354990  | 94355190  |
| 10 | 94583216  | 94608460 -  | NR_131146    | Gm29684       | 23317  | 94584943  | 94585143  |
| 10 | 94637380  | 94786732 -  | NM_009950    | Cradd         | 104030 | 94682502  | 94682702  |
| 10 | 95403297  | 95508153 +  | NM_001001932 | Eea1          | 30373  | 95433670  | 95433870  |
| 10 | 95403297  | 95508153 +  | NM_001001932 | Eea1          | -402   | 95402695  | 95402895  |
| 10 | 95688841  | 95711343 +  | NR_110448    | 4930459C07Rik | 6694   | 95695535  | 95695735  |
| 10 | 96079635  | 96085446 +  | NM_007569    | Btg1          | 2775   | 96082410  | 96082610  |
| 10 | 96942134  | 96980797 +  | NM_001190451 | Dcn           | 7738   | 96949872  | 96950072  |
| 10 | 96944984  | 96980797 +  | NM_007833    | Dcn           | 4888   | 96949872  | 96950072  |
| 10 | 98377786  | 98488778 +  | NM_026482    | Atp2b1        | 20764  | 98398550  | 98398750  |
| 10 | 98569805  | 98660623 +  | NM_027740    | Poc1b         | 82025  | 98651830  | 98652030  |
| 10 | 98569805  | 98660623 +  | NM_027740    | Poc1b         | 87642  | 98657447  | 98657647  |
| 10 | 98569805  | 98660623 +  | NM_027740    | Poc1b         | 6171   | 98575976  | 98576176  |
| 10 | 98725865  | 98730124 +  | NM_026268    | Dusp6         | 1790   | 98727655  | 98727855  |
| 10 | 99071805  | 99120769 +  | NR_038019    | Gm20110       | 47823  | 99119628  | 99119828  |
| 10 | 99071805  | 99120769 +  | NR_038019    | Gm20110       | 42971  | 99114776  | 99114976  |
| 10 | 99478458  | 99563047 +  | NM_013598    | Kitl          | 4634   | 99483092  | 99483292  |
| 10 | 99478458  | 99563047 +  | NM_013598    | Kitl          | -5093  | 99473165  | 99473365  |
| 10 | 101144121 | 101854103 + | NM_001205098 | Mgat4c        | 702751 | 101846872 | 101847072 |
| 10 | 101144121 | 101854103 + | NM_001205098 | Mgat4c        | 692606 | 101836727 | 101836927 |
| 10 | 101621492 | 101854103 + | NM_001162368 | Mgat4c        | 225380 | 101846872 | 101847072 |
| 10 | 101621492 | 101854103 + | NM_001162368 | Mgat4c        | 215235 | 101836727 | 101836927 |
| 10 | 101621713 | 101854103 + | NM_001162369 | Mgat4c        | 225159 | 101846872 | 101847072 |
| 10 | 101621713 | 101854103 + | NM_001162369 | Mgat4c        | 215014 | 101836727 | 101836927 |
| 10 | 101837071 | 101854103 + | NM_026243    | Mgat4c        | 9801   | 101846872 | 101847072 |

|    |           |             |              |               |        |           |           |
|----|-----------|-------------|--------------|---------------|--------|-----------|-----------|
| 10 | 101837071 | 101854103 + | NM_026243    | Mgat4c        | -144   | 101836727 | 101836927 |
| 10 | 104624720 | 105011536 - | NM_177368    | Tmtc2         | 6869   | 105004467 | 105004667 |
| 10 | 104624720 | 105011536 - | NM_177368    | Tmtc2         | -98    | 105011634 | 105011834 |
| 10 | 104624720 | 105011536 - | NM_177368    | Tmtc2         | 42672  | 104968664 | 104968864 |
| 10 | 104624720 | 105011536 - | NM_177368    | Tmtc2         | 44002  | 104967334 | 104967534 |
| 10 | 105011607 | 105020927 + | NR_038032    | Gm15663       | -6940  | 105004467 | 105004667 |
| 10 | 105011607 | 105020927 + | NR_038032    | Gm15663       | 27     | 105011634 | 105011834 |
| 10 | 105200241 | 105278437 - | NM_207522    | Mettl25       | -4090  | 105282527 | 105282727 |
| 10 | 105278535 | 105284567 + | NM_025602    | Ccdc59        | 3992   | 105282527 | 105282727 |
| 10 | 105907366 | 106370525 + | NM_001205341 | Ppfia2        | 115475 | 106022841 | 106023041 |
| 10 | 105907366 | 106370525 + | NM_177373    | Ppfia2        | 115475 | 106022841 | 106023041 |
| 10 | 105992251 | 106039537 - | NR_131026    | 4930532I03Rik | 16496  | 106022841 | 106023041 |
| 10 | 105992251 | 106038112 - | NR_131027    | 4930532I03Rik | 15071  | 106022841 | 106023041 |
| 10 | 106373220 | 106560721 - | NM_001142804 | Acss3         | 11765  | 106548756 | 106548956 |
| 10 | 106402138 | 106560721 - | NM_198636    | Acss3         | 11765  | 106548756 | 106548956 |
| 10 | 106708887 | 106862200 + | NM_001033223 | Lin7a         | 44663  | 106753550 | 106753750 |
| 10 | 106708887 | 106862200 + | NM_001033223 | Lin7a         | 86880  | 106795767 | 106795967 |
| 10 | 106708887 | 106862200 + | NM_001033223 | Lin7a         | 81657  | 106790544 | 106790744 |
| 10 | 106708887 | 106862200 + | NM_001033223 | Lin7a         | 44351  | 106753238 | 106753438 |
| 10 | 106708887 | 106862200 + | NM_001039354 | Lin7a         | 44663  | 106753550 | 106753750 |
| 10 | 106708887 | 106862200 + | NM_001039354 | Lin7a         | 86880  | 106795767 | 106795967 |
| 10 | 106708887 | 106862200 + | NM_001039354 | Lin7a         | 81657  | 106790544 | 106790744 |
| 10 | 106708887 | 106862200 + | NM_001039354 | Lin7a         | 44351  | 106753238 | 106753438 |
| 10 | 106709450 | 106862200 + | NM_001284329 | Lin7a         | 44100  | 106753550 | 106753750 |
| 10 | 106709450 | 106862200 + | NM_001284329 | Lin7a         | 86317  | 106795767 | 106795967 |
| 10 | 106709450 | 106862200 + | NM_001284329 | Lin7a         | 81094  | 106790544 | 106790744 |
| 10 | 106709450 | 106862200 + | NM_001284329 | Lin7a         | 43788  | 106753238 | 106753438 |
| 10 | 107199366 | 107349191 - | NM_001177567 | Otogl         | 116611 | 107232380 | 107232580 |
| 10 | 107383701 | 107414889 + | NR_131147    | Gm29685       | 3376   | 107387077 | 107387277 |
| 10 | 107769245 | 107851448 + | NM_054056    | Pawr          | 1535   | 107770780 | 107770980 |

|    |           |             |              |               |        |           |           |
|----|-----------|-------------|--------------|---------------|--------|-----------|-----------|
| 10 | 107769245 | 107851448 + | NM_054056    | Pawr          | -899   | 107768146 | 107768346 |
| 10 | 110238230 | 110333564 - | NR_045979    | 1700020G17Rik | 54670  | 110278694 | 110278894 |
| 10 | 110378836 | 110447123 - | NM_172554    | Zdhhc17       | -2632  | 110449755 | 110449955 |
| 10 | 111023775 | 111031330 - | NR_045344    | 4933440J02Rik | -1464  | 111032794 | 111032994 |
| 10 | 111023775 | 111031330 - | NR_045344    | 4933440J02Rik | 5865   | 111025265 | 111025465 |
| 10 | 111291577 | 111311433 - | NR_046029    | Gm20758       | 15635  | 111295598 | 111295798 |
| 10 | 114515697 | 114622079 - | NM_173391    | Tph2          | 87512  | 114534367 | 114534567 |
| 10 | 114634927 | 114688550 - | NM_025706    | Tbc1d15       | -993   | 114689543 | 114689743 |
| 10 | 114634927 | 114688550 - | NM_025706    | Tbc1d15       | 3254   | 114685096 | 114685296 |
| 10 | 114634927 | 114688550 - | NM_025706    | Tbc1d15       | 805    | 114687545 | 114687745 |
| 10 | 114634927 | 114688550 - | NM_025706    | Tbc1d15       | 1858   | 114686492 | 114686692 |
| 10 | 114726918 | 114752648 - | NM_024454    | Rab21         | 3975   | 114748473 | 114748673 |
| 10 | 114777796 | 114799319 - | NM_133683    | Tmem19        | 2807   | 114796312 | 114796512 |
| 10 | 114887370 | 115024837 - | NM_010195    | Lgr5          | 1066   | 115023571 | 115023771 |
| 10 | 114887370 | 115024837 - | NM_010195    | Lgr5          | 102948 | 114921689 | 114921889 |
| 10 | 115254340 | 115286950 + | NM_001168679 | Tspan8        | 25395  | 115279735 | 115279935 |
| 10 | 115254340 | 115286950 + | NM_001168679 | Tspan8        | 3599   | 115257939 | 115258139 |
| 10 | 115254340 | 115286950 + | NM_001168679 | Tspan8        | 0      | 115254258 | 115254458 |
| 10 | 115254340 | 115286950 + | NM_001168680 | Tspan8        | 25395  | 115279735 | 115279935 |
| 10 | 115254340 | 115286950 + | NM_001168680 | Tspan8        | 3599   | 115257939 | 115258139 |
| 10 | 115254340 | 115286950 + | NM_001168680 | Tspan8        | 0      | 115254258 | 115254458 |
| 10 | 115254340 | 115286950 + | NM_146010    | Tspan8        | 25395  | 115279735 | 115279935 |
| 10 | 115254340 | 115286950 + | NM_146010    | Tspan8        | 3599   | 115257939 | 115258139 |
| 10 | 115254340 | 115286950 + | NM_146010    | Tspan8        | 0      | 115254258 | 115254458 |
| 10 | 115455419 | 115711986 + | NM_011217    | Ptpr          | 164522 | 115619941 | 115620141 |
| 10 | 115455419 | 115711986 + | NM_011217    | Ptpr          | 164972 | 115620391 | 115620591 |
| 10 | 115455419 | 115711986 + | NM_011217    | Ptpr          | 116994 | 115572413 | 115572613 |
| 10 | 115580954 | 115711986 + | NM_001161837 | Ptpr          | 38987  | 115619941 | 115620141 |
| 10 | 115580954 | 115711986 + | NM_001161837 | Ptpr          | 39437  | 115620391 | 115620591 |
| 10 | 115580954 | 115711986 + | NM_001161837 | Ptpr          | -8341  | 115572413 | 115572613 |

|    |           |             |              |         |       |           |           |
|----|-----------|-------------|--------------|---------|-------|-----------|-----------|
| 10 | 115614314 | 115711986 + | NM_001161839 | Ptpr    | 5627  | 115619941 | 115620141 |
| 10 | 115614314 | 115711986 + | NM_001161839 | Ptpr    | 6077  | 115620391 | 115620591 |
| 10 | 115614407 | 115711986 + | NM_001161838 | Ptpr    | 5534  | 115619941 | 115620141 |
| 10 | 115614407 | 115711986 + | NM_001161838 | Ptpr    | 5984  | 115620391 | 115620591 |
| 10 | 115614407 | 115711986 + | NM_001161840 | Ptpr    | 5534  | 115619941 | 115620141 |
| 10 | 115614407 | 115711986 + | NM_001161840 | Ptpr    | 5984  | 115620391 | 115620591 |
| 10 | 115922217 | 116018568 - | NM_001037846 | Cnot2   | 4112  | 116014256 | 116014456 |
| 10 | 115922217 | 116018568 - | NM_001037846 | Cnot2   | -3270 | 116021838 | 116022038 |
| 10 | 115922217 | 116018568 - | NM_001037847 | Cnot2   | 4112  | 116014256 | 116014456 |
| 10 | 115922217 | 116018568 - | NM_001037847 | Cnot2   | -3270 | 116021838 | 116022038 |
| 10 | 115922217 | 116018568 - | NM_028082    | Cnot2   | 4112  | 116014256 | 116014456 |
| 10 | 115922217 | 116018568 - | NM_028082    | Cnot2   | -3270 | 116021838 | 116022038 |
| 10 | 115922217 | 116018568 - | NR_024327    | Cnot2   | 4112  | 116014256 | 116014456 |
| 10 | 115922217 | 116018568 - | NR_024327    | Cnot2   | -3270 | 116021838 | 116022038 |
| 10 | 115946847 | 116018568 - | NM_001037848 | Cnot2   | 4112  | 116014256 | 116014456 |
| 10 | 115946847 | 116018568 - | NM_001037848 | Cnot2   | -3270 | 116021838 | 116022038 |
| 10 | 116213601 | 116333936 - | NM_001033333 | Myrfl   | 22154 | 116311582 | 116311782 |
| 10 | 116213601 | 116333936 - | NM_001033333 | Myrfl   | 270   | 116333466 | 116333666 |
| 10 | 116213601 | 116333936 - | NM_001033333 | Myrfl   | 9090  | 116324646 | 116324846 |
| 10 | 116213601 | 116333936 - | NM_001033333 | Myrfl   | 20851 | 116312885 | 116313085 |
| 10 | 116213601 | 116333936 - | NM_001033333 | Myrfl   | 32806 | 116300930 | 116301130 |
| 10 | 116482397 | 116483825 + | NM_146242    | Lrrc10  | -8180 | 116474017 | 116474217 |
| 10 | 116488054 | 116500871 - | NM_007636    | Cct2    | 535   | 116500136 | 116500336 |
| 10 | 116507183 | 116585531 - | NM_177798    | Frs2    | 59718 | 116525613 | 116525813 |
| 10 | 116507183 | 116585531 - | NM_177798    | Frs2    | -1940 | 116587471 | 116587671 |
| 10 | 116724851 | 116729925 - | NM_013590    | Lyz1    | -7192 | 116737117 | 116737317 |
| 10 | 117066556 | 117124409 + | NM_027468    | Cpm     | 47428 | 117113984 | 117114184 |
| 10 | 117170734 | 117183415 - | NM_029875    | Slc35e3 | 7467  | 117175748 | 117175948 |
| 10 | 117939091 | 117993582 - | NR_104123    | Tmevpg1 | 48570 | 117944812 | 117945012 |
| 10 | 118296405 | 118305960 - | NM_001014390 | Dyrk2   | 6971  | 118298789 | 118298989 |

|    |           |             |              |               |        |           |           |
|----|-----------|-------------|--------------|---------------|--------|-----------|-----------|
| 10 | 118296405 | 118305960 - | NM_001014390 | Dyrk2         | -3384  | 118309344 | 118309544 |
| 10 | 118529961 | 118540164 + | NR_045348    | 1700064J06Rik | 5609   | 118535570 | 118535770 |
| 10 | 118635868 | 118677112 - | NM_027994    | Cand1         | 28506  | 118648406 | 118648606 |
| 10 | 118635868 | 118677112 - | NM_027994    | Cand1         | 33313  | 118643599 | 118643799 |
| 10 | 118891090 | 119514218 + | NM_001277292 | Grip1         | 561032 | 119452122 | 119452322 |
| 10 | 118891090 | 119524317 + | NM_001277293 | Grip1         | 561032 | 119452122 | 119452322 |
| 10 | 118891090 | 119514218 + | NM_133442    | Grip1         | 561032 | 119452122 | 119452322 |
| 10 | 119256445 | 119514218 + | NM_001277294 | Grip1         | 195677 | 119452122 | 119452322 |
| 10 | 119256445 | 119514218 + | NM_028736    | Grip1         | 195677 | 119452122 | 119452322 |
| 10 | 119256445 | 119514218 + | NM_130891    | Grip1         | 195677 | 119452122 | 119452322 |
| 10 | 119429978 | 119514218 + | NM_001277295 | Grip1         | 22144  | 119452122 | 119452322 |
| 10 | 119429978 | 119524317 + | NR_102387    | Grip1         | 22144  | 119452122 | 119452322 |
| 10 | 119578710 | 119638594 - | NM_028679    | Irak3         | -547   | 119639141 | 119639341 |
| 10 | 119645882 | 119661954 + | NM_026617    | Tmbim4        | -6541  | 119639141 | 119639341 |
| 10 | 119798331 | 119913992 - | NM_010441    | Hmga2         | 82634  | 119831158 | 119831358 |
| 10 | 119798331 | 119913992 - | NM_010441    | Hmga2         | 59146  | 119854646 | 119854846 |
| 10 | 120360467 | 120416387 - | NM_001081193 | Lemd3         | 20543  | 120395644 | 120395844 |
| 10 | 120847407 | 120913307 - | NM_138956    | Rassf3        | 56078  | 120857029 | 120857229 |
| 10 | 120847407 | 120913307 - | NM_138956    | Rassf3        | 21325  | 120891782 | 120891982 |
| 10 | 120847407 | 120913307 - | NM_138956    | Rassf3        | 20379  | 120892728 | 120892928 |
| 10 | 120847407 | 120913307 - | NM_138956    | Rassf3        | 36609  | 120876498 | 120876698 |
| 10 | 120847407 | 120913307 - | NM_138956    | Rassf3        | 22868  | 120890239 | 120890439 |
| 10 | 120847407 | 120913307 - | NM_138956    | Rassf3        | 48235  | 120864872 | 120865072 |
| 10 | 120983513 | 121023851 - | NM_019786    | Tbk1          | 37074  | 120986577 | 120986777 |
| 10 | 120983513 | 121023851 - | NM_019786    | Tbk1          | 968    | 121022683 | 121022883 |
| 10 | 120983513 | 121023851 - | NM_019786    | Tbk1          | 1427   | 121022224 | 121022424 |
| 10 | 121024436 | 121063373 - | NM_001081056 | Xpot          | 21343  | 121041830 | 121042030 |
| 10 | 121176993 | 121189916 + | NM_173022    | BC048403      | -223   | 121176570 | 121176770 |
| 10 | 121218047 | 121484372 - | NM_001081037 | Srgap1        | 54865  | 121429307 | 121429507 |
| 10 | 121218047 | 121484372 - | NM_001242411 | Srgap1        | 54865  | 121429307 | 121429507 |



|    |           |             |              |          |        |           |           |
|----|-----------|-------------|--------------|----------|--------|-----------|-----------|
| 10 | 122115818 | 122382850 + | NM_001110218 | Ppm1h    | 845    | 122116663 | 122116863 |
| 10 | 122115818 | 122382850 + | NM_001110218 | Ppm1h    | 48536  | 122164354 | 122164554 |
| 10 | 122115818 | 122382850 + | NM_001110218 | Ppm1h    | 207163 | 122322981 | 122323181 |
| 10 | 122115818 | 122382850 + | NM_001110218 | Ppm1h    | 17712  | 122133530 | 122133730 |
| 10 | 122115818 | 122359031 + | NM_176919    | Ppm1h    | 845    | 122116663 | 122116863 |
| 10 | 122115818 | 122359031 + | NM_176919    | Ppm1h    | 48536  | 122164354 | 122164554 |
| 10 | 122115818 | 122359031 + | NM_176919    | Ppm1h    | 207163 | 122322981 | 122323181 |
| 10 | 122115818 | 122359031 + | NM_176919    | Ppm1h    | 17712  | 122133530 | 122133730 |
| 10 | 122116371 | 122116472 + | NR_106182    | Mir8104  | 292    | 122116663 | 122116863 |
| 10 | 122429117 | 122513562 - | NM_001163024 | Mon2     | 23108  | 122490254 | 122490454 |
| 10 | 122429117 | 122513562 - | NM_001163024 | Mon2     | -157   | 122513719 | 122513919 |
| 10 | 122429117 | 122513562 - | NM_001163024 | Mon2     | 4164   | 122509198 | 122509398 |
| 10 | 122429117 | 122513562 - | NM_001163025 | Mon2     | 23108  | 122490254 | 122490454 |
| 10 | 122429117 | 122513562 - | NM_001163025 | Mon2     | -157   | 122513719 | 122513919 |
| 10 | 122429117 | 122513562 - | NM_001163025 | Mon2     | 4164   | 122509198 | 122509398 |
| 10 | 122429117 | 122513562 - | NM_153395    | Mon2     | 23108  | 122490254 | 122490454 |
| 10 | 122429117 | 122513562 - | NM_153395    | Mon2     | -157   | 122513719 | 122513919 |
| 10 | 122429117 | 122513562 - | NM_153395    | Mon2     | 4164   | 122509198 | 122509398 |
| 10 | 124664541 | 124765592 - | NM_011391    | Slc16a7  | 62279  | 124703113 | 124703313 |
| 10 | 125403275 | 125452416 + | NM_177152    | Lrig3    | -1224  | 125401851 | 125402051 |
| 10 | 125403275 | 125452416 + | NM_177152    | Lrig3    | -4157  | 125398918 | 125399118 |
| 10 | 126531315 | 126558217 - | NM_001171026 | Os9      | -5429  | 126563646 | 126563846 |
| 10 | 126531315 | 126558217 - | NM_001171026 | Os9      | 9304   | 126548713 | 126548913 |
| 10 | 126531315 | 126558217 - | NM_177614    | Os9      | -5429  | 126563646 | 126563846 |
| 10 | 126531315 | 126558217 - | NM_177614    | Os9      | 9304   | 126548713 | 126548913 |
| 10 | 126602212 | 126605580 + | NM_001244617 | B4galnt1 | -6342  | 126595670 | 126595870 |
| 10 | 126602212 | 126605580 + | NM_001244617 | B4galnt1 | -1061  | 126600951 | 126601151 |
| 10 | 126602212 | 126609397 + | NM_008080    | B4galnt1 | -6342  | 126595670 | 126595870 |
| 10 | 126602212 | 126609397 + | NM_008080    | B4galnt1 | -1061  | 126600951 | 126601151 |
| 10 | 126602212 | 126609397 + | NR_045166    | B4galnt1 | -6342  | 126595670 | 126595870 |

|    |           |             |              |               |       |           |           |
|----|-----------|-------------|--------------|---------------|-------|-----------|-----------|
| 10 | 126602212 | 126609397 + | NR_045166    | B4galnt1      | -1061 | 126600951 | 126601151 |
| 10 | 126602887 | 126605580 + | NM_001244618 | B4galnt1      | -7017 | 126595670 | 126595870 |
| 10 | 126602887 | 126605580 + | NM_001244618 | B4galnt1      | -1736 | 126600951 | 126601151 |
| 10 | 126602887 | 126609397 + | NM_027739    | B4galnt1      | -7017 | 126595670 | 126595870 |
| 10 | 126602887 | 126609397 + | NM_027739    | B4galnt1      | -1736 | 126600951 | 126601151 |
| 10 | 126619577 | 126626880 - | NM_001166413 | Arhgef25      | -4694 | 126631574 | 126631774 |
| 10 | 126619577 | 126627111 - | NM_028027    | Arhgef25      | -4463 | 126631574 | 126631774 |
| 10 | 126627434 | 126632766 - | NM_030714    | Dtx3          | 992   | 126631574 | 126631774 |
| 10 | 126627434 | 126632766 - | NM_030714    | Dtx3          | -8095 | 126640861 | 126641061 |
| 10 | 126632305 | 126639700 + | NR_045715    | F420014N23Rik | -531  | 126631574 | 126631774 |
| 10 | 126632305 | 126639700 + | NR_045716    | F420014N23Rik | -531  | 126631574 | 126631774 |
| 10 | 126634123 | 126648679 - | NM_054097    | Pip4k2c       | 7618  | 126640861 | 126641061 |
| 10 | 126719012 | 126725828 - | NM_033072    | Mbd6          | -3267 | 126729095 | 126729295 |
| 10 | 126719012 | 126725828 - | NM_033072    | Mbd6          | -1944 | 126727772 | 126727972 |
| 10 | 126727849 | 126733345 + | NM_001290183 | Ddit3         | 1246  | 126729095 | 126729295 |
| 10 | 126727849 | 126733345 + | NM_001290183 | Ddit3         | 0     | 126727772 | 126727972 |
| 10 | 126727849 | 126733345 + | NM_007837    | Ddit3         | 1246  | 126729095 | 126729295 |
| 10 | 126727849 | 126733345 + | NM_007837    | Ddit3         | 0     | 126727772 | 126727972 |
| 10 | 126793382 | 126807601 - | NM_010565    | Inhbc         | -7476 | 126815077 | 126815277 |
| 10 | 126827367 | 126936441 + | NM_001168292 | R3hdm2        | 72554 | 126899921 | 126900121 |
| 10 | 126857923 | 126936441 + | NM_001168293 | R3hdm2        | 41998 | 126899921 | 126900121 |
| 10 | 126857923 | 126936441 + | NM_027900    | R3hdm2        | 41998 | 126899921 | 126900121 |
| 10 | 126975214 | 127058205 - | NM_008512    | Lrp1          | 8372  | 127049633 | 127049833 |
| 10 | 126975214 | 127058205 - | NM_008512    | Lrp1          | 35280 | 127022725 | 127022925 |
| 10 | 126975214 | 127058205 - | NM_008512    | Lrp1          | 16838 | 127041167 | 127041367 |
| 10 | 126975214 | 127058205 - | NM_008512    | Lrp1          | 28355 | 127029650 | 127029850 |
| 10 | 127080042 | 127098044 + | NM_009284    | Stat6         | 2830  | 127082872 | 127083072 |
| 10 | 127080042 | 127098044 + | NM_009284    | Stat6         | 15126 | 127095168 | 127095368 |
| 10 | 127080042 | 127098044 + | NM_009284    | Stat6         | -9775 | 127070067 | 127070267 |
| 10 | 127104179 | 127105908 + | NR_045171    | 1700012D01Rik | -8811 | 127095168 | 127095368 |

|    |           |             |              |         |       |           |           |
|----|-----------|-------------|--------------|---------|-------|-----------|-----------|
| 10 | 127114121 | 127138104 + | NM_001113211 | Tmem194 | 664   | 127114785 | 127114985 |
| 10 | 127114121 | 127138104 + | NM_001113211 | Tmem194 | 18383 | 127132504 | 127132704 |
| 10 | 127114121 | 127132223 + | NM_173732    | Tmem194 | 664   | 127114785 | 127114985 |
| 10 | 127142312 | 127157997 + | NM_001081219 | Myo1a   | -9608 | 127132504 | 127132704 |
| 10 | 127176594 | 127184396 + | NM_198035    | Zbtb39  | -966  | 127175428 | 127175628 |
| 10 | 127213461 | 127229754 + | NM_153133    | Rdh9    | -69   | 127213192 | 127213392 |
| 10 | 127238209 | 127252896 + | NM_009040    | Rdh16   | -881  | 127237128 | 127237328 |
| 10 | 127321083 | 127325790 - | NM_001150749 | Rdh7    | 0     | 127325715 | 127325915 |
| 10 | 127321083 | 127325790 - | NM_001150749 | Rdh7    | -7058 | 127332848 | 127333048 |
| 10 | 127321083 | 127325756 - | NM_017473    | Rdh7    | 0     | 127325715 | 127325915 |
| 10 | 127321083 | 127325756 - | NM_017473    | Rdh7    | -7092 | 127332848 | 127333048 |
| 10 | 127335591 | 127348816 + | NM_027301    | Sdr9c7  | -9676 | 127325715 | 127325915 |
| 10 | 127335591 | 127348816 + | NM_027301    | Sdr9c7  | -2543 | 127332848 | 127333048 |
| 10 | 127427992 | 127444565 - | NM_013786    | Hsd17b6 | 8250  | 127436115 | 127436315 |
| 10 | 127427992 | 127444565 - | NM_013786    | Hsd17b6 | 2331  | 127442034 | 127442234 |
| 10 | 127520363 | 127527445 + | NM_016774    | Atp5b   | -2485 | 127517678 | 127517878 |
| 10 | 127522342 | 127522420 + | NR_030442    | Mir677  | -4464 | 127517678 | 127517878 |
| 10 | 127566526 | 127617354 - | NM_001039080 | Rbms2   | -5752 | 127623106 | 127623306 |
| 10 | 127566526 | 127613625 - | NM_019711    | Rbms2   | -9481 | 127623106 | 127623306 |
| 10 | 127631691 | 127647061 + | NM_001033264 | Gls2    | -8385 | 127623106 | 127623306 |
| 10 | 127631691 | 127647061 + | NM_001285777 | Gls2    | -8385 | 127623106 | 127623306 |
| 10 | 127631691 | 127647061 + | NM_001285779 | Gls2    | -8385 | 127623106 | 127623306 |
| 10 | 127740391 | 127758415 + | NM_001252326 | Pan2    | 12416 | 127752807 | 127753007 |
| 10 | 127740391 | 127758415 + | NM_001252327 | Pan2    | 12416 | 127752807 | 127753007 |
| 10 | 127740391 | 127758415 + | NM_133992    | Pan2    | 12416 | 127752807 | 127753007 |
| 10 | 127759515 | 127764244 + | NM_019953    | Cnpy2   | 1091  | 127760606 | 127760806 |
| 10 | 127759515 | 127764244 + | NM_019953    | Cnpy2   | -6508 | 127752807 | 127753007 |
| 10 | 127774888 | 127799536 + | NM_026444    | Cs      | -274  | 127774414 | 127774614 |
| 10 | 127774888 | 127799536 + | NM_026444    | Cs      | 7213  | 127782101 | 127782301 |
| 10 | 127774888 | 127799536 + | NM_026444    | Cs      | -996  | 127773692 | 127773892 |

|    |           |             |              |               |       |           |           |
|----|-----------|-------------|--------------|---------------|-------|-----------|-----------|
| 10 | 127774888 | 127799536 + | NM_026444    | Cs            | -2939 | 127771749 | 127771949 |
| 10 | 127800153 | 127807094 - | NM_001081040 | Coq10a        | 653   | 127806241 | 127806441 |
| 10 | 127814180 | 127831063 + | NM_172790    | Ankrd52       | -7739 | 127806241 | 127806441 |
| 10 | 127927917 | 127930882 - | NM_010860    | Myl6          | -8637 | 127939519 | 127939719 |
| 10 | 127931213 | 127935742 - | NM_172259    | Myl6b         | -3777 | 127939519 | 127939719 |
| 10 | 127931213 | 127935742 - | NM_172259    | Myl6b         | -6012 | 127941754 | 127941954 |
| 10 | 127936303 | 127941299 + | NR_131150    | A430046D13Rik | 3216  | 127939519 | 127939719 |
| 10 | 127936303 | 127941299 + | NR_131151    | A430046D13Rik | 3216  | 127939519 | 127939719 |
| 10 | 127947306 | 127962916 - | NM_011843    | Esyt1         | 8393  | 127954323 | 127954523 |
| 10 | 127947306 | 127962916 - | NM_011843    | Esyt1         | -590  | 127963506 | 127963706 |
| 10 | 127947306 | 127962916 - | NM_011843    | Esyt1         | 15137 | 127947579 | 127947779 |
| 10 | 127949024 | 127949087 - | NR_105881    | Mir6916       | -5236 | 127954323 | 127954523 |
| 10 | 127949024 | 127949087 - | NR_105881    | Mir6916       | 1308  | 127947579 | 127947779 |
| 10 | 128006424 | 128026558 - | NM_010153    | Erb3          | 5452  | 128020906 | 128021106 |
| 10 | 128006424 | 128026558 - | NM_010153    | Erb3          | 532   | 128025826 | 128026026 |
| 10 | 128006424 | 128026558 - | NM_010153    | Erb3          | 9834  | 128016524 | 128016724 |
| 10 | 128021493 | 128021554 - | NR_105882    | Mir6917       | 448   | 128020906 | 128021106 |
| 10 | 128021493 | 128021554 - | NR_105882    | Mir6917       | -4272 | 128025826 | 128026026 |
| 10 | 128106943 | 128110975 - | NM_173733    | Suox          | 1281  | 128109494 | 128109694 |
| 10 | 128157192 | 128181113 - | NM_016811    | Dgka          | -271  | 128181384 | 128181584 |
| 10 | 128184935 | 128203625 + | NM_001253705 | Wibg          | -3351 | 128181384 | 128181584 |
| 10 | 128184935 | 128203625 + | NM_030100    | Wibg          | -3351 | 128181384 | 128181584 |
| 10 | 128185511 | 128203625 + | NM_001170869 | Wibg          | -3927 | 128181384 | 128181584 |
| 10 | 128185511 | 128203625 + | NM_001253704 | Wibg          | -3927 | 128181384 | 128181584 |
| 10 | 128395333 | 128398045 - | NM_027853    | Mettl7b       | -2108 | 128400153 | 128400353 |
| 11 | 3024024   | 3031948 +   | NR_003517    | Pisd-ps1      | 3466  | 3027490   | 3027690   |
| 11 | 3024024   | 3031948 +   | NR_003517    | Pisd-ps1      | 5347  | 3029371   | 3029571   |
| 11 | 3024024   | 3031948 +   | NR_003517    | Pisd-ps1      | 4380  | 3028404   | 3028604   |
| 11 | 3024024   | 3031948 +   | NR_003517    | Pisd-ps1      | -33   | 3023791   | 3023991   |
| 11 | 3024024   | 3031948 +   | NR_003517    | Pisd-ps1      | 1501  | 3025525   | 3025725   |

|    |         |           |              |           |       |         |         |
|----|---------|-----------|--------------|-----------|-------|---------|---------|
| 11 | 3024030 | 3031946 + | NR_003518    | Pisd-ps3  | 3460  | 3027490 | 3027690 |
| 11 | 3024030 | 3031946 + | NR_003518    | Pisd-ps3  | 5341  | 3029371 | 3029571 |
| 11 | 3024030 | 3031946 + | NR_003518    | Pisd-ps3  | 4374  | 3028404 | 3028604 |
| 11 | 3024030 | 3031946 + | NR_003518    | Pisd-ps3  | -39   | 3023791 | 3023991 |
| 11 | 3024030 | 3031946 + | NR_003518    | Pisd-ps3  | 1495  | 3025525 | 3025725 |
| 11 | 3031853 | 3093467 - | NM_030207    | Sfi1      | 18945 | 3074322 | 3074522 |
| 11 | 3031853 | 3093467 - | NM_030207    | Sfi1      | -4657 | 3098124 | 3098324 |
| 11 | 3031853 | 3093467 - | NM_030207    | Sfi1      | -5467 | 3098934 | 3099134 |
| 11 | 3031853 | 3093467 - | NM_030207    | Sfi1      | 9466  | 3083801 | 3084001 |
| 11 | 3031853 | 3093467 - | NM_030207    | Sfi1      | 3007  | 3090260 | 3090460 |
| 11 | 3031853 | 3093467 - | NM_030207    | Sfi1      | 190   | 3093077 | 3093277 |
| 11 | 3031853 | 3093467 - | NM_030207    | Sfi1      | 8350  | 3084917 | 3085117 |
| 11 | 3031853 | 3093467 - | NM_030207    | Sfi1      | 14280 | 3078987 | 3079187 |
| 11 | 3031853 | 3093467 - | NM_030207    | Sfi1      | 10643 | 3082624 | 3082824 |
| 11 | 3031853 | 3093467 - | NM_030207    | Sfi1      | 15329 | 3077938 | 3078138 |
| 11 | 3031853 | 3093467 - | NM_030207    | Sfi1      | 18123 | 3075144 | 3075344 |
| 11 | 3031853 | 3093467 - | NM_030207    | Sfi1      | 50736 | 3042531 | 3042731 |
| 11 | 3031853 | 3093467 - | NM_030207    | Sfi1      | 27654 | 3065613 | 3065813 |
| 11 | 3031853 | 3093467 - | NM_030207    | Sfi1      | 23724 | 3069543 | 3069743 |
| 11 | 3031853 | 3093467 - | NM_030207    | Sfi1      | 22734 | 3070533 | 3070733 |
| 11 | 3031853 | 3093467 - | NM_030207    | Sfi1      | 26028 | 3067239 | 3067439 |
| 11 | 3031853 | 3093467 - | NM_030207    | Sfi1      | 35743 | 3057524 | 3057724 |
| 11 | 3031853 | 3093467 - | NM_030207    | Sfi1      | 29512 | 3063755 | 3063955 |
| 11 | 3031853 | 3093467 - | NM_030207    | Sfi1      | 39384 | 3053883 | 3054083 |
| 11 | 3031853 | 3093467 - | NM_030207    | Sfi1      | 41962 | 3051305 | 3051505 |
| 11 | 3031853 | 3093467 - | NM_030207    | Sfi1      | 55817 | 3037450 | 3037650 |
| 11 | 3102356 | 3144592 + | NM_001166548 | Eif4enif1 | -4032 | 3098124 | 3098324 |
| 11 | 3102356 | 3144592 + | NM_001166548 | Eif4enif1 | -3222 | 3098934 | 3099134 |
| 11 | 3102356 | 3144592 + | NM_001166548 | Eif4enif1 | -9079 | 3093077 | 3093277 |
| 11 | 3102586 | 3144592 + | NM_023743    | Eif4enif1 | -4262 | 3098124 | 3098324 |

|    |         |           |              |               |       |         |         |
|----|---------|-----------|--------------|---------------|-------|---------|---------|
| 11 | 3102586 | 3144592 + | NM_023743    | Eif4enif1     | -3452 | 3098934 | 3099134 |
| 11 | 3102586 | 3144592 + | NM_023743    | Eif4enif1     | -9309 | 3093077 | 3093277 |
| 11 | 3102998 | 3144592 + | NM_001166547 | Eif4enif1     | -4674 | 3098124 | 3098324 |
| 11 | 3102998 | 3144592 + | NM_001166547 | Eif4enif1     | -3864 | 3098934 | 3099134 |
| 11 | 3102998 | 3144592 + | NM_001166547 | Eif4enif1     | -9721 | 3093077 | 3093277 |
| 11 | 3103022 | 3144592 + | NM_001166549 | Eif4enif1     | -4698 | 3098124 | 3098324 |
| 11 | 3103022 | 3144592 + | NM_001166549 | Eif4enif1     | -3888 | 3098934 | 3099134 |
| 11 | 3103022 | 3144592 + | NM_001166549 | Eif4enif1     | -9745 | 3093077 | 3093277 |
| 11 | 3209003 | 3220726 + | NR_045708    | Gm11944       | 4288  | 3213291 | 3213491 |
| 11 | 3243300 | 3309242 - | NM_010718    | Limk2         | 21244 | 3287798 | 3287998 |
| 11 | 3315976 | 3352960 - | NM_001290472 | Rnf185        | -6310 | 3359270 | 3359470 |
| 11 | 3315976 | 3352960 - | NM_001290472 | Rnf185        | -4914 | 3357874 | 3358074 |
| 11 | 3315976 | 3352960 - | NM_001290473 | Rnf185        | -6310 | 3359270 | 3359470 |
| 11 | 3315976 | 3352960 - | NM_001290473 | Rnf185        | -4914 | 3357874 | 3358074 |
| 11 | 3315976 | 3352960 - | NM_145355    | Rnf185        | -6310 | 3359270 | 3359470 |
| 11 | 3315976 | 3352960 - | NM_145355    | Rnf185        | -4914 | 3357874 | 3358074 |
| 11 | 3315976 | 3352960 - | NR_110959    | Rnf185        | -6310 | 3359270 | 3359470 |
| 11 | 3315976 | 3352960 - | NR_110959    | Rnf185        | -4914 | 3357874 | 3358074 |
| 11 | 3352440 | 3379835 + | NR_028317    | 8430429K09Rik | 6830  | 3359270 | 3359470 |
| 11 | 3352440 | 3379835 + | NR_028317    | 8430429K09Rik | 20059 | 3372499 | 3372699 |
| 11 | 3352440 | 3379835 + | NR_028317    | 8430429K09Rik | 16667 | 3369107 | 3369307 |
| 11 | 3352440 | 3379835 + | NR_028317    | 8430429K09Rik | 5434  | 3357874 | 3358074 |
| 11 | 3352475 | 3358346 + | NR_045275    | 8430429K09Rik | 5399  | 3357874 | 3358074 |
| 11 | 3352486 | 3358346 + | NR_045276    | 8430429K09Rik | 5388  | 3357874 | 3358074 |
| 11 | 3394275 | 3404825 - | NM_172439    | Inpp5j        | -9685 | 3414510 | 3414710 |
| 11 | 3414705 | 3417355 + | NM_053267    | Selm          | 0     | 3414510 | 3414710 |
| 11 | 3991484 | 3995435 - | NM_026443    | Mtfp1         | 1658  | 3993577 | 3993777 |
| 11 | 3991484 | 3995435 - | NM_026443    | Mtfp1         | 0     | 3995290 | 3995490 |
| 11 | 3997043 | 4018733 - | NM_144520    | Sec14l2       | 1674  | 4016859 | 4017059 |
| 11 | 3997043 | 4018733 - | NM_144520    | Sec14l2       | 5518  | 4013015 | 4013215 |

|    |         |           |              |               |        |         |         |
|----|---------|-----------|--------------|---------------|--------|---------|---------|
| 11 | 4157571 | 4172518 + | NM_008501    | Lif           | 1650   | 4159221 | 4159421 |
| 11 | 4166799 | 4172518 + | NM_001039537 | Lif           | -7378  | 4159221 | 4159421 |
| 11 | 4246386 | 4341086 - | NM_029458    | Hormad2       | 80458  | 4260428 | 4260628 |
| 11 | 4638824 | 4646782 - | NM_138948    | Cabp7         | -2433  | 4649215 | 4649415 |
| 11 | 4665848 | 4749548 - | NM_001252250 | Nf2           | 25740  | 4723608 | 4723808 |
| 11 | 4665848 | 4749548 - | NM_001252252 | Nf2           | 25740  | 4723608 | 4723808 |
| 11 | 4665848 | 4749548 - | NM_010898    | Nf2           | 25740  | 4723608 | 4723808 |
| 11 | 4672337 | 4749548 - | NM_001252251 | Nf2           | 25740  | 4723608 | 4723808 |
| 11 | 4682108 | 4733139 - | NM_001252253 | Nf2           | 9331   | 4723608 | 4723808 |
| 11 | 4774006 | 4794204 + | NM_008698    | Nipsnap1      | 10032  | 4784038 | 4784238 |
| 11 | 4791348 | 4791406 + | NR_105883    | Mir6918       | -7110  | 4784038 | 4784238 |
| 11 | 4847524 | 4942798 + | NM_001243043 | Ap1b1         | 39790  | 4887314 | 4887514 |
| 11 | 4847524 | 4942798 + | NM_001243043 | Ap1b1         | 36057  | 4883581 | 4883781 |
| 11 | 4886827 | 4942798 + | NM_001243044 | Ap1b1         | 487    | 4887314 | 4887514 |
| 11 | 4886827 | 4942798 + | NM_001243044 | Ap1b1         | -3046  | 4883581 | 4883781 |
| 11 | 4886827 | 4942798 + | NM_007454    | Ap1b1         | 487    | 4887314 | 4887514 |
| 11 | 4886827 | 4942798 + | NM_007454    | Ap1b1         | -3046  | 4883581 | 4883781 |
| 11 | 5091556 | 5161614 - | NM_032396    | Kremen1       | 7814   | 5153600 | 5153800 |
| 11 | 5176332 | 5344851 - | NM_001080924 | Znrf3         | 146911 | 5197740 | 5197940 |
| 11 | 5176332 | 5344851 - | NM_001080924 | Znrf3         | 38351  | 5306300 | 5306500 |
| 11 | 5176332 | 5344851 - | NM_001080924 | Znrf3         | 137547 | 5207104 | 5207304 |
| 11 | 5176332 | 5344851 - | NM_001080924 | Znrf3         | 160552 | 5184099 | 5184299 |
| 11 | 5176332 | 5281744 - | NM_001290501 | Znrf3         | 83804  | 5197740 | 5197940 |
| 11 | 5176332 | 5281744 - | NM_001290501 | Znrf3         | 74440  | 5207104 | 5207304 |
| 11 | 5176332 | 5281744 - | NM_001290501 | Znrf3         | 97445  | 5184099 | 5184299 |
| 11 | 5420644 | 5425997 + | NM_001271730 | Xbp1          | 1387   | 5422031 | 5422231 |
| 11 | 5420644 | 5425997 + | NM_013842    | Xbp1          | 1387   | 5422031 | 5422231 |
| 11 | 5428891 | 5442221 - | NM_134033    | Ccdc117       | -117   | 5442338 | 5442538 |
| 11 | 5662153 | 5684714 + | NR_015577    | 2210015D19Rik | 20434  | 5682587 | 5682787 |
| 11 | 5688486 | 5700984 + | NM_001146308 | Dbnl          | -5699  | 5682587 | 5682787 |

|    |         |           |              |         |       |         |         |
|----|---------|-----------|--------------|---------|-------|---------|---------|
| 11 | 5688486 | 5700984 + | NM_001146309 | Dbnl    | -5699 | 5682587 | 5682787 |
| 11 | 5688486 | 5700984 + | NM_013810    | Dbnl    | -5699 | 5682587 | 5682787 |
| 11 | 5701640 | 5703800 - | NM_018870    | Pgam2   | 689   | 5702911 | 5703111 |
| 11 | 5800826 | 5850085 - | NM_010292    | Gck     | -4491 | 5854576 | 5854776 |
| 11 | 5855761 | 5867784 + | NM_019661    | Ykt6    | -985  | 5854576 | 5854776 |
| 11 | 5869669 | 5965752 - | NM_001174053 | Camk2b  | 31922 | 5933630 | 5933830 |
| 11 | 5869669 | 5965752 - | NM_001174054 | Camk2b  | 31922 | 5933630 | 5933830 |
| 11 | 5869669 | 5965752 - | NM_007595    | Camk2b  | 31922 | 5933630 | 5933830 |
| 11 | 6005695 | 6100455 - | NM_173748    | Nudcd3  | 625   | 6099630 | 6099830 |
| 11 | 6005695 | 6100455 - | NM_173748    | Nudcd3  | 88349 | 6011906 | 6012106 |
| 11 | 6005695 | 6100455 - | NM_173748    | Nudcd3  | 1826  | 6098429 | 6098629 |
| 11 | 6111014 | 6130249 - | NM_207242    | Npc1l1  | -2292 | 6132541 | 6132741 |
| 11 | 6111014 | 6130249 - | NM_207242    | Npc1l1  | -522  | 6130771 | 6130971 |
| 11 | 6111014 | 6130249 - | NM_207242    | Npc1l1  | 35    | 6130014 | 6130214 |
| 11 | 6157548 | 6167733 - | NM_026538    | Ddx56   | -3    | 6167736 | 6167936 |
| 11 | 6157548 | 6167733 - | NM_026538    | Ddx56   | -6030 | 6173763 | 6173963 |
| 11 | 6170717 | 6174841 - | NM_134020    | Tmed4   | 878   | 6173763 | 6173963 |
| 11 | 6191600 | 6259098 + | NM_001252282 | Ogdh    | 14320 | 6205920 | 6206120 |
| 11 | 6191600 | 6259098 + | NM_001252282 | Ogdh    | 44989 | 6236589 | 6236789 |
| 11 | 6191600 | 6259098 + | NM_001252283 | Ogdh    | 14320 | 6205920 | 6206120 |
| 11 | 6191600 | 6259098 + | NM_001252283 | Ogdh    | 44989 | 6236589 | 6236789 |
| 11 | 6191600 | 6259098 + | NM_001252287 | Ogdh    | 14320 | 6205920 | 6206120 |
| 11 | 6191600 | 6259098 + | NM_001252287 | Ogdh    | 44989 | 6236589 | 6236789 |
| 11 | 6191600 | 6259098 + | NM_010956    | Ogdh    | 14320 | 6205920 | 6206120 |
| 11 | 6191600 | 6259098 + | NM_010956    | Ogdh    | 44989 | 6236589 | 6236789 |
| 11 | 6192561 | 6259098 + | NM_001252288 | Ogdh    | 13359 | 6205920 | 6206120 |
| 11 | 6192561 | 6259098 + | NM_001252288 | Ogdh    | 44028 | 6236589 | 6236789 |
| 11 | 6406551 | 6420962 - | NM_178440    | Myo1g   | -7563 | 6428525 | 6428725 |
| 11 | 6425594 | 6428764 - | NR_045893    | Gm11974 | 39    | 6428525 | 6428725 |
| 11 | 6963492 | 7078509 + | NM_009622    | Adcy1   | 32161 | 6995653 | 6995853 |



|    |          |            |              |               |        |          |          |
|----|----------|------------|--------------|---------------|--------|----------|----------|
| 11 | 8331655  | 8564539 -  | NM_001083587 | Tns3          | 34985  | 8529354  | 8529554  |
| 11 | 8331655  | 8564539 -  | NM_001083587 | Tns3          | 25366  | 8538973  | 8539173  |
| 11 | 8331655  | 8564539 -  | NM_001083587 | Tns3          | 105366 | 8458973  | 8459173  |
| 11 | 8331655  | 8564539 -  | NM_001083587 | Tns3          | 81618  | 8482721  | 8482921  |
| 11 | 8331655  | 8564539 -  | NM_001083587 | Tns3          | 53701  | 8510638  | 8510838  |
| 11 | 8331655  | 8564539 -  | NM_001083587 | Tns3          | 84828  | 8479511  | 8479711  |
| 11 | 8916057  | 8939595 -  | NM_001290519 | Sun3          | -9400  | 8948995  | 8949195  |
| 11 | 8916057  | 8948995 -  | NM_001290520 | Sun3          | 0      | 8948995  | 8949195  |
| 11 | 8916057  | 8948995 -  | NM_177576    | Sun3          | 0      | 8948995  | 8949195  |
| 11 | 8948595  | 8969358 +  | NM_001037928 | Gm11992       | 400    | 8948995  | 8949195  |
| 11 | 11714104 | 11798148 - | NM_001190448 | Ddc           | 9535   | 11788413 | 11788613 |
| 11 | 11714104 | 11798148 - | NM_001190448 | Ddc           | 46609  | 11751339 | 11751539 |
| 11 | 11714104 | 11798148 - | NM_001190448 | Ddc           | 12958  | 11784990 | 11785190 |
| 11 | 11714104 | 11798148 - | NM_001190448 | Ddc           | 72074  | 11725874 | 11726074 |
| 11 | 11714104 | 11790412 - | NM_016672    | Ddc           | 1799   | 11788413 | 11788613 |
| 11 | 11714104 | 11790412 - | NM_016672    | Ddc           | 38873  | 11751339 | 11751539 |
| 11 | 11714104 | 11790412 - | NM_016672    | Ddc           | 5222   | 11784990 | 11785190 |
| 11 | 11714104 | 11790412 - | NM_016672    | Ddc           | 64338  | 11725874 | 11726074 |
| 11 | 11768126 | 11785325 + | NR_045178    | 1700042O10Rik | 16864  | 11784990 | 11785190 |
| 11 | 11830502 | 11927975 - | NM_001177629 | Grb10         | 85311  | 11842464 | 11842664 |
| 11 | 11830502 | 11927975 - | NM_001177629 | Grb10         | 65692  | 11862083 | 11862283 |
| 11 | 11830502 | 11937424 - | NM_010345    | Grb10         | 94760  | 11842464 | 11842664 |
| 11 | 11830502 | 11937424 - | NM_010345    | Grb10         | 75141  | 11862083 | 11862283 |
| 11 | 12136679 | 12364964 - | NM_001282993 | Cobl          | 55175  | 12309589 | 12309789 |
| 11 | 12136679 | 12364964 - | NM_001282993 | Cobl          | 219302 | 12145462 | 12145662 |
| 11 | 12136679 | 12312144 - | NM_001282994 | Cobl          | 2355   | 12309589 | 12309789 |
| 11 | 12136679 | 12312144 - | NM_001282994 | Cobl          | 166482 | 12145462 | 12145662 |
| 11 | 12136679 | 12364964 - | NM_172496    | Cobl          | 55175  | 12309589 | 12309789 |
| 11 | 12136679 | 12364964 - | NM_172496    | Cobl          | 219302 | 12145462 | 12145662 |
| 11 | 16652206 | 16787662 + | NM_007912    | Egfr          | 48623  | 16700829 | 16701029 |

|    |          |            |              |         |        |          |          |
|----|----------|------------|--------------|---------|--------|----------|----------|
| 11 | 16652206 | 16787662 + | NM_007912    | Egfr    | 61366  | 16713572 | 16713772 |
| 11 | 16652206 | 16813911 + | NM_207655    | Egfr    | 48623  | 16700829 | 16701029 |
| 11 | 16652206 | 16813911 + | NM_207655    | Egfr    | 148489 | 16800695 | 16800895 |
| 11 | 16652206 | 16813911 + | NM_207655    | Egfr    | 61366  | 16713572 | 16713772 |
| 11 | 17059301 | 17100384 + | NM_024459    | Ppp3r1  | 4677   | 17063978 | 17064178 |
| 11 | 19824445 | 19922601 + | NM_033523    | Spred2  | 49311  | 19873756 | 19873956 |
| 11 | 19824445 | 19922601 + | NM_033523    | Spred2  | 67957  | 19892402 | 19892602 |
| 11 | 19824445 | 19922601 + | NM_033523    | Spred2  | 94844  | 19919289 | 19919489 |
| 11 | 19824445 | 19922601 + | NM_033523    | Spred2  | 55141  | 19879586 | 19879786 |
| 11 | 19962307 | 20012955 - | NM_146243    | Actr2   | -4518  | 20017473 | 20017673 |
| 11 | 20101605 | 20126860 + | NM_008996    | Rab1    | 3413   | 20105018 | 20105218 |
| 11 | 20127040 | 20149428 - | NM_172260    | Cep68   | 440    | 20148788 | 20148988 |
| 11 | 20443256 | 20553027 + | NM_021372    | Sertad2 | 99506  | 20542762 | 20542962 |
| 11 | 20443256 | 20553027 + | NM_021372    | Sertad2 | 92928  | 20536184 | 20536384 |
| 11 | 20531980 | 20553027 + | NM_001038625 | Sertad2 | 10782  | 20542762 | 20542962 |
| 11 | 20531980 | 20553027 + | NM_001038625 | Sertad2 | 4204   | 20536184 | 20536384 |
| 11 | 20585088 | 20641560 - | NM_001252503 | Aftph   | 14351  | 20627009 | 20627209 |
| 11 | 20585088 | 20641560 - | NM_001290545 | Aftph   | 14351  | 20627009 | 20627209 |
| 11 | 20585088 | 20641560 - | NM_181411    | Aftph   | 14351  | 20627009 | 20627209 |
| 11 | 20723358 | 20731112 - | NM_173752    | Lgalsl  | 1074   | 20729838 | 20730038 |
| 11 | 20723358 | 20731112 - | NM_173752    | Lgalsl  | -735   | 20731847 | 20732047 |
| 11 | 20991327 | 21050331 + | NM_023324    | Peli1   | 34344  | 21025671 | 21025871 |
| 11 | 20991327 | 21050331 + | NM_023324    | Peli1   | 14149  | 21005476 | 21005676 |
| 11 | 21456695 | 21471938 - | NM_008618    | Mdh1    | 6994   | 21464744 | 21464944 |
| 11 | 21456695 | 21471938 - | NM_008618    | Mdh1    | 12005  | 21459733 | 21459933 |
| 11 | 21472284 | 21798690 + | NM_145425    | Wdpcp   | -7340  | 21464744 | 21464944 |
| 11 | 21894767 | 21901655 - | NM_011023    | Otx1    | 3361   | 21898094 | 21898294 |
| 11 | 21905829 | 22186799 - | NM_001252515 | Ehbp1   | 39632  | 22146967 | 22147167 |
| 11 | 21905829 | 22186799 - | NM_001252515 | Ehbp1   | 11969  | 22174630 | 22174830 |
| 11 | 21905829 | 22186799 - | NM_001252515 | Ehbp1   | 12378  | 22174221 | 22174421 |

|    |          |            |              |               |        |          |          |
|----|----------|------------|--------------|---------------|--------|----------|----------|
| 11 | 21905829 | 22186799 - | NM_001252515 | Ehbp1         | 19528  | 22167071 | 22167271 |
| 11 | 21905829 | 22186799 - | NM_001252515 | Ehbp1         | 192899 | 21993700 | 21993900 |
| 11 | 21905829 | 22186799 - | NM_001252515 | Ehbp1         | 48402  | 22138197 | 22138397 |
| 11 | 21905829 | 22186799 - | NM_153078    | Ehbp1         | 39632  | 22146967 | 22147167 |
| 11 | 21905829 | 22186799 - | NM_153078    | Ehbp1         | 11969  | 22174630 | 22174830 |
| 11 | 21905829 | 22186799 - | NM_153078    | Ehbp1         | 12378  | 22174221 | 22174421 |
| 11 | 21905829 | 22186799 - | NM_153078    | Ehbp1         | 19528  | 22167071 | 22167271 |
| 11 | 21905829 | 22186799 - | NM_153078    | Ehbp1         | 192899 | 21993700 | 21993900 |
| 11 | 21905829 | 22186799 - | NM_153078    | Ehbp1         | 48402  | 22138197 | 22138397 |
| 11 | 22734739 | 22760337 - | NM_001169114 | B3gnt2        | 14904  | 22745233 | 22745433 |
| 11 | 22734739 | 22759736 - | NM_016888    | B3gnt2        | 14303  | 22745233 | 22745433 |
| 11 | 22799728 | 22882285 - | NM_144514    | Commd1        | 62668  | 22819417 | 22819617 |
| 11 | 22799728 | 22882285 - | NM_144514    | Commd1        | 10048  | 22872037 | 22872237 |
| 11 | 22872005 | 22876497 + | NM_011663    | Zrsr1         | 32     | 22872037 | 22872237 |
| 11 | 23052140 | 23066376 + | NR_131065    | 1700061J23Rik | -1852  | 23050088 | 23050288 |
| 11 | 23156041 | 23197598 + | NM_001035226 | Xpo1          | 4268   | 23160309 | 23160509 |
| 11 | 23156041 | 23197598 + | NM_134014    | Xpo1          | 4268   | 23160309 | 23160509 |
| 11 | 23206895 | 23390561 + | NM_001190401 | Usp34         | 38628  | 23245523 | 23245723 |
| 11 | 23641729 | 23670971 - | NM_009044    | Rel           | 360    | 23670411 | 23670611 |
| 11 | 23978056 | 24073559 + | NM_001159289 | Bcl11a        | 52143  | 24030199 | 24030399 |
| 11 | 23978056 | 24068436 + | NM_001242934 | Bcl11a        | 52143  | 24030199 | 24030399 |
| 11 | 23978056 | 24073559 + | NM_016707    | Bcl11a        | 52143  | 24030199 | 24030399 |
| 11 | 23980695 | 24073559 + | NM_001159290 | Bcl11a        | 49504  | 24030199 | 24030399 |
| 11 | 24381909 | 24469952 + | NR_045857    | 4933430M04Rik | 34905  | 24416814 | 24417014 |
| 11 | 24381909 | 24469952 + | NR_045857    | 4933430M04Rik | 87080  | 24468989 | 24469189 |
| 11 | 24381909 | 24469952 + | NR_045857    | 4933430M04Rik | -8641  | 24373068 | 24373268 |
| 11 | 29274172 | 29410809 + | NM_176841    | Ccdc88a       | 130432 | 29404604 | 29404804 |
| 11 | 29643051 | 29926034 - | NM_146016    | Eml6          | 223500 | 29702334 | 29702534 |
| 11 | 29643051 | 29926034 - | NM_146016    | Eml6          | 80331  | 29845503 | 29845703 |
| 11 | 29643051 | 29926034 - | NM_146016    | Eml6          | 224340 | 29701494 | 29701694 |

|    |          |            |              |         |       |          |          |
|----|----------|------------|--------------|---------|-------|----------|----------|
| 11 | 29999395 | 30119773 - | NM_175836    | Sptbn1  | 61429 | 30058144 | 30058344 |
| 11 | 29999395 | 30119773 - | NM_175836    | Sptbn1  | 21750 | 30097823 | 30098023 |
| 11 | 29999395 | 30119773 - | NM_175836    | Sptbn1  | 21269 | 30098304 | 30098504 |
| 11 | 29999395 | 30119773 - | NM_175836    | Sptbn1  | 47714 | 30071859 | 30072059 |
| 11 | 29999395 | 30119773 - | NM_175836    | Sptbn1  | 55632 | 30063941 | 30064141 |
| 11 | 30006843 | 30098258 - | NM_009260    | Sptbn1  | 39914 | 30058144 | 30058344 |
| 11 | 30006843 | 30098258 - | NM_009260    | Sptbn1  | 235   | 30097823 | 30098023 |
| 11 | 30006843 | 30098258 - | NM_009260    | Sptbn1  | -46   | 30098304 | 30098504 |
| 11 | 30006843 | 30098258 - | NM_009260    | Sptbn1  | 26199 | 30071859 | 30072059 |
| 11 | 30006843 | 30098258 - | NM_009260    | Sptbn1  | 34117 | 30063941 | 30064141 |
| 11 | 30405992 | 30549397 - | NM_029344    | Acyp2   | 2986  | 30546211 | 30546411 |
| 11 | 30671775 | 30780362 + | NM_134013    | Psme4   | -8292 | 30663283 | 30663483 |
| 11 | 30671775 | 30780362 + | NM_134013    | Psme4   | 16207 | 30687982 | 30688182 |
| 11 | 31565150 | 31571863 - | NM_001024919 | Bod1    | -201  | 31572064 | 31572264 |
| 11 | 31770940 | 31835636 + | NM_001290676 | Cpeb4   | 51539 | 31822479 | 31822679 |
| 11 | 31770940 | 31835636 + | NM_001290676 | Cpeb4   | 8467  | 31779407 | 31779607 |
| 11 | 31770940 | 31835636 + | NM_001290678 | Cpeb4   | 51539 | 31822479 | 31822679 |
| 11 | 31770940 | 31835636 + | NM_001290678 | Cpeb4   | 8467  | 31779407 | 31779607 |
| 11 | 31770940 | 31835636 + | NM_026252    | Cpeb4   | 51539 | 31822479 | 31822679 |
| 11 | 31770940 | 31835636 + | NM_026252    | Cpeb4   | 8467  | 31779407 | 31779607 |
| 11 | 32088997 | 32100280 - | NM_001134458 | Il9r    | -5082 | 32105362 | 32105562 |
| 11 | 32088997 | 32100280 - | NM_008374    | Il9r    | -5082 | 32105362 | 32105562 |
| 11 | 32105415 | 32108996 + | NM_030093    | Snrnp25 | 0     | 32105362 | 32105562 |
| 11 | 32109585 | 32122294 - | NM_001291818 | Rhbdf1  | 4871  | 32117223 | 32117423 |
| 11 | 32109585 | 32122294 - | NM_010117    | Rhbdf1  | 4871  | 32117223 | 32117423 |
| 11 | 32126505 | 32132703 + | NM_010822    | Mpg     | -9082 | 32117223 | 32117423 |
| 11 | 32433266 | 32524596 + | NM_009288    | Stk10   | 33125 | 32466391 | 32466591 |
| 11 | 32433266 | 32524596 + | NM_009288    | Stk10   | 29379 | 32462645 | 32462845 |
| 11 | 32542555 | 32646815 + | NM_001271347 | Fbxw11  | 11582 | 32554137 | 32554337 |
| 11 | 32542555 | 32646815 + | NM_001271347 | Fbxw11  | 4052  | 32546607 | 32546807 |

|    |          |            |              |        |       |          |          |
|----|----------|------------|--------------|--------|-------|----------|----------|
| 11 | 32542555 | 32646815 + | NM_001271347 | Fbxw11 | -1724 | 32540631 | 32540831 |
| 11 | 32542555 | 32646815 + | NM_001271348 | Fbxw11 | 11582 | 32554137 | 32554337 |
| 11 | 32542555 | 32646815 + | NM_001271348 | Fbxw11 | 4052  | 32546607 | 32546807 |
| 11 | 32542555 | 32646815 + | NM_001271348 | Fbxw11 | -1724 | 32540631 | 32540831 |
| 11 | 32542555 | 32646815 + | NM_001271349 | Fbxw11 | 11582 | 32554137 | 32554337 |
| 11 | 32542555 | 32646815 + | NM_001271349 | Fbxw11 | 4052  | 32546607 | 32546807 |
| 11 | 32542555 | 32646815 + | NM_001271349 | Fbxw11 | -1724 | 32540631 | 32540831 |
| 11 | 32542555 | 32646815 + | NM_134015    | Fbxw11 | 11582 | 32554137 | 32554337 |
| 11 | 32542555 | 32646815 + | NM_134015    | Fbxw11 | 4052  | 32546607 | 32546807 |
| 11 | 32542555 | 32646815 + | NM_134015    | Fbxw11 | -1724 | 32540631 | 32540831 |
| 11 | 33529341 | 33893194 - | NM_001190886 | Kcnip1 | 90499 | 33802495 | 33802695 |
| 11 | 35582997 | 35604788 + | NM_145962    | Pank3  | 16711 | 35599708 | 35599908 |
| 11 | 35652680 | 35793592 - | NM_170779    | Wwc1   | 54174 | 35739218 | 35739418 |
| 11 | 35652680 | 35793592 - | NM_170779    | Wwc1   | 9164  | 35784228 | 35784428 |
| 11 | 35652680 | 35793592 - | NM_170779    | Wwc1   | 8485  | 35784907 | 35785107 |
| 11 | 35652680 | 35793592 - | NM_170779    | Wwc1   | 15666 | 35777726 | 35777926 |
| 11 | 35652680 | 35793592 - | NM_170779    | Wwc1   | 14261 | 35779131 | 35779331 |
| 11 | 35652680 | 35793592 - | NM_170779    | Wwc1   | 16276 | 35777116 | 35777316 |
| 11 | 35652680 | 35793592 - | NM_170779    | Wwc1   | 34620 | 35758772 | 35758972 |
| 11 | 42963379 | 43075788 + | NM_176999    | Atp10b | 25040 | 42988419 | 42988619 |
| 11 | 42963379 | 43075788 + | NM_176999    | Atp10b | 67240 | 43030619 | 43030819 |
| 11 | 42963379 | 43075788 + | NM_176999    | Atp10b | 35043 | 42998422 | 42998622 |
| 11 | 42963379 | 43075788 + | NM_176999    | Atp10b | 33100 | 42996479 | 42996679 |
| 11 | 42963379 | 43075788 + | NM_176999    | Atp10b | 6191  | 42969570 | 42969770 |
| 11 | 42963379 | 43075788 + | NM_176999    | Atp10b | 8221  | 42971600 | 42971800 |
| 11 | 42963379 | 43075788 + | NM_176999    | Atp10b | 10509 | 42973888 | 42974088 |
| 11 | 42963379 | 43075788 + | NM_176999    | Atp10b | 7504  | 42970883 | 42971083 |
| 11 | 43233750 | 43239751 - | NM_001131054 | Pttg1  | 489   | 43239062 | 43239262 |
| 11 | 43233750 | 43239484 - | NM_013917    | Pttg1  | 222   | 43239062 | 43239262 |
| 11 | 43247233 | 43261484 + | NM_148673    | Slu7   | -7971 | 43239062 | 43239262 |

|    |          |            |              |               |       |          |          |
|----|----------|------------|--------------|---------------|-------|----------|----------|
| 11 | 43247233 | 43261484 + | NM_198936    | Slu7          | -7971 | 43239062 | 43239262 |
| 11 | 43342251 | 43400502 + | NM_001045530 | Ccnjl         | 20007 | 43362258 | 43362458 |
| 11 | 43409542 | 43415065 - | NM_008375    | Fabp6         | -7417 | 43422482 | 43422682 |
| 11 | 43409542 | 43415065 - | NM_008375    | Fabp6         | 3644  | 43411221 | 43411421 |
| 11 | 44268073 | 44284051 - | NM_024475    | Ublcp1        | 670   | 44283181 | 44283381 |
| 11 | 44332466 | 44379023 + | NM_028862    | Rnf145        | -6272 | 44325994 | 44326194 |
| 11 | 44332879 | 44368480 + | NM_001166553 | Rnf145        | -6685 | 44325994 | 44326194 |
| 11 | 45621585 | 45656381 + | NR_045876    | F630206G17Rik | -499  | 45620886 | 45621086 |
| 11 | 45621585 | 45656381 + | NR_045876    | F630206G17Rik | 2851  | 45624436 | 45624636 |
| 11 | 45621585 | 45656381 + | NR_045876    | F630206G17Rik | -2411 | 45618974 | 45619174 |
| 11 | 45621585 | 45656381 + | NR_045876    | F630206G17Rik | -1387 | 45619998 | 45620198 |
| 11 | 46792285 | 47192805 - | NM_011891    | Sgcd          | 73041 | 47119564 | 47119764 |
| 11 | 48613862 | 48619744 + | NM_008143    | Gnb2l1        | 0     | 48613681 | 48613881 |
| 11 | 48615535 | 48615612 + | NR_028563    | Snord96a      | -1654 | 48613681 | 48613881 |
| 11 | 48616641 | 48616709 + | NR_028564    | Snord95       | -2760 | 48613681 | 48613881 |
| 11 | 48678751 | 48684849 - | NM_008326    | Irgm1         | -2334 | 48687183 | 48687383 |
| 11 | 48678751 | 48684849 - | NM_008326    | Irgm1         | -3366 | 48688215 | 48688415 |
| 11 | 48700924 | 48715655 - | NM_001024230 | Gm5431        | -6451 | 48722106 | 48722306 |
| 11 | 48718158 | 48740685 - | NM_001045540 | Gm12185       | 18379 | 48722106 | 48722306 |
| 11 | 48864235 | 48948890 + | NM_010999    | Olfr56        | 80685 | 48944920 | 48945120 |
| 11 | 48864235 | 48948890 + | NM_010999    | Olfr56        | 77749 | 48941984 | 48942184 |
| 11 | 49017002 | 49032319 + | NM_001024846 | Zfp62         | 600   | 49017602 | 49017802 |
| 11 | 49017002 | 49032319 + | NM_009562    | Zfp62         | 600   | 49017602 | 49017802 |
| 11 | 49057693 | 49076527 + | NM_001110148 | Mgat1         | 1406  | 49059099 | 49059299 |
| 11 | 49057693 | 49076527 + | NM_001110148 | Mgat1         | -6551 | 49050942 | 49051142 |
| 11 | 49057693 | 49076527 + | NM_010794    | Mgat1         | 1406  | 49059099 | 49059299 |
| 11 | 49057693 | 49076527 + | NM_010794    | Mgat1         | -6551 | 49050942 | 49051142 |
| 11 | 49060979 | 49076527 + | NM_001110149 | Mgat1         | -1680 | 49059099 | 49059299 |
| 11 | 49060979 | 49076527 + | NM_001110149 | Mgat1         | -9837 | 49050942 | 49051142 |
| 11 | 49064054 | 49076527 + | NM_001110150 | Mgat1         | -4755 | 49059099 | 49059299 |

|    |          |            |              |               |        |          |          |
|----|----------|------------|--------------|---------------|--------|----------|----------|
| 11 | 49988353 | 50013618 + | NM_026543    | 3010026009Rik | 20059  | 50008412 | 50008612 |
| 11 | 50013654 | 50024323 - | NM_001290769 | Sqstm1        | -2568  | 50026891 | 50027091 |
| 11 | 50013654 | 50024323 - | NM_011018    | Sqstm1        | -2568  | 50026891 | 50027091 |
| 11 | 50191221 | 50200031 + | NM_021510    | Hnrnph1       | 0      | 50191168 | 50191368 |
| 11 | 50191221 | 50200031 + | NM_021510    | Hnrnph1       | -229   | 50190792 | 50190992 |
| 11 | 50415587 | 50611849 + | NM_001277305 | Adamts2       | 137590 | 50553177 | 50553377 |
| 11 | 50415587 | 50621076 + | NM_175643    | Adamts2       | 137590 | 50553177 | 50553377 |
| 11 | 51067153 | 51076454 - | NM_177567    | BC049762      | -6502  | 51082956 | 51083156 |
| 11 | 51076616 | 51095273 + | NM_001304744 | Clk4          | 6340   | 51082956 | 51083156 |
| 11 | 51076616 | 51095273 + | NM_007714    | Clk4          | 6340   | 51082956 | 51083156 |
| 11 | 51103422 | 51397428 + | NM_153393    | Col23a1       | 249855 | 51353277 | 51353477 |
| 11 | 51398259 | 51416772 + | NM_028398    | Phykpl        | -143   | 51397916 | 51398116 |
| 11 | 51505765 | 51570337 - | NM_001290785 | Sec24a        | -903   | 51571240 | 51571440 |
| 11 | 51505765 | 51570337 - | NM_001290785 | Sec24a        | -9396  | 51579733 | 51579933 |
| 11 | 51505765 | 51570337 - | NM_001290785 | Sec24a        | -7248  | 51577585 | 51577785 |
| 11 | 51505765 | 51570337 - | NM_001290785 | Sec24a        | 17541  | 51552596 | 51552796 |
| 11 | 51505765 | 51570337 - | NM_175255    | Sec24a        | -903   | 51571240 | 51571440 |
| 11 | 51505765 | 51570337 - | NM_175255    | Sec24a        | -9396  | 51579733 | 51579933 |
| 11 | 51505765 | 51570337 - | NM_175255    | Sec24a        | -7248  | 51577585 | 51577785 |
| 11 | 51505765 | 51570337 - | NM_175255    | Sec24a        | 17541  | 51552596 | 51552796 |
| 11 | 51577165 | 51605456 + | NM_025535    | Sar1b         | -5725  | 51571240 | 51571440 |
| 11 | 51577165 | 51605456 + | NM_025535    | Sar1b         | 2568   | 51579733 | 51579933 |
| 11 | 51577165 | 51605456 + | NM_025535    | Sar1b         | 420    | 51577585 | 51577785 |
| 11 | 51626958 | 51670984 - | NM_199299    | Jade2         | 33557  | 51637227 | 51637427 |
| 11 | 51781133 | 51790839 + | NM_029976    | Cdkn2aipnl    | -229   | 51780704 | 51780904 |
| 11 | 51817723 | 51851668 + | NM_001166653 | Cdkl3         | 24891  | 51842614 | 51842814 |
| 11 | 51817723 | 51898170 + | NM_001166654 | Cdkl3         | 24891  | 51842614 | 51842814 |
| 11 | 51817723 | 51898170 + | NM_001166654 | Cdkl3         | 68186  | 51885909 | 51886109 |
| 11 | 51817723 | 51847374 + | NM_001166656 | Cdkl3         | 24891  | 51842614 | 51842814 |
| 11 | 51817723 | 51851668 + | NM_153785    | Cdkl3         | 24891  | 51842614 | 51842814 |

|    |          |            |              |          |        |          |          |
|----|----------|------------|--------------|----------|--------|----------|----------|
| 11 | 52026554 | 52027490 - | NM_207253    | Olfr1371 | -6598  | 52034088 | 52034288 |
| 11 | 52045497 | 52060361 + | NM_011543    | Skp1a    | -7682  | 52037615 | 52037815 |
| 11 | 52174617 | 52202899 + | NM_011694    | Vdac1    | 5277   | 52179894 | 52180094 |
| 11 | 52578208 | 53000850 + | NM_177059    | Fstl4    | 375539 | 52953747 | 52953947 |
| 11 | 53073316 | 53113982 - | NM_008300    | Hspa4    | -8229  | 53122211 | 53122411 |
| 11 | 53164269 | 53235333 + | NM_033565    | Aff4     | 67486  | 53231755 | 53231955 |
| 11 | 53164269 | 53235333 + | NM_033565    | Aff4     | -5262  | 53158807 | 53159007 |
| 11 | 53235683 | 53236639 - | NM_153069    | Leap2    | -7106  | 53243745 | 53243945 |
| 11 | 53235683 | 53236639 - | NM_153069    | Leap2    | -8622  | 53245261 | 53245461 |
| 11 | 53235683 | 53236639 - | NM_153069    | Leap2    | -59    | 53236698 | 53236898 |
| 11 | 53242450 | 53244334 - | NM_025352    | Uqcrq    | 389    | 53243745 | 53243945 |
| 11 | 53242450 | 53244334 - | NM_025352    | Uqcrq    | -927   | 53245261 | 53245461 |
| 11 | 53246788 | 53251405 + | NM_008110    | Gdf9     | -2843  | 53243745 | 53243945 |
| 11 | 53246788 | 53251405 + | NM_008110    | Gdf9     | -1327  | 53245261 | 53245461 |
| 11 | 53246788 | 53251405 + | NM_008110    | Gdf9     | -9890  | 53236698 | 53236898 |
| 11 | 53270707 | 53281269 + | NM_001290789 | Shroom1  | -6819  | 53263688 | 53263888 |
| 11 | 53270707 | 53281269 + | NM_027917    | Shroom1  | -6819  | 53263688 | 53263888 |
| 11 | 53290080 | 53293698 - | NM_183173    | Sowaha   | -3116  | 53296814 | 53297014 |
| 11 | 53425963 | 53432168 - | NM_021283    | Il4      | 1103   | 53430865 | 53431065 |
| 11 | 53425963 | 53430841 - | NR_027491    | Il4      | -24    | 53430865 | 53431065 |
| 11 | 53577099 | 53577157 - | NR_106131    | Mir7671  | 364    | 53576593 | 53576793 |
| 11 | 53577099 | 53577157 - | NR_106131    | Mir7671  | -1956  | 53579113 | 53579313 |
| 11 | 53583516 | 53591877 + | NM_001159393 | Irf1     | -6723  | 53576593 | 53576793 |
| 11 | 53583516 | 53591877 + | NM_001159393 | Irf1     | -4203  | 53579113 | 53579313 |
| 11 | 53583516 | 53590827 + | NM_008390    | Irf1     | -6723  | 53576593 | 53576793 |
| 11 | 53583516 | 53590827 + | NM_008390    | Irf1     | -4203  | 53579113 | 53579313 |
| 11 | 53583975 | 53590827 + | NM_001159396 | Irf1     | -7182  | 53576593 | 53576793 |
| 11 | 53583975 | 53590827 + | NM_001159396 | Irf1     | -4662  | 53579113 | 53579313 |
| 11 | 53598991 | 53672759 - | NR_033332    | Gm12216  | 18937  | 53653622 | 53653822 |
| 11 | 53598991 | 53672759 - | NR_033332    | Gm12216  | 14746  | 53657813 | 53658013 |



|    |          |            |              |               |       |          |          |
|----|----------|------------|--------------|---------------|-------|----------|----------|
| 11 | 53598991 | 53672759 - | NR_033332    | Gm12216       | 62806 | 53609753 | 53609953 |
| 11 | 53598991 | 53672759 - | NR_033332    | Gm12216       | 61486 | 53611073 | 53611273 |
| 11 | 53678044 | 53705206 - | NM_011396    | Slc22a5       | 5925  | 53699081 | 53699281 |
| 11 | 53678044 | 53705206 - | NM_011396    | Slc22a5       | -5307 | 53710513 | 53710713 |
| 11 | 53796628 | 53841593 - | NM_019687    | Slc22a4       | 3817  | 53837576 | 53837776 |
| 11 | 53991274 | 54026791 - | NR_045506    | 4933405E24Rik | 11648 | 54014943 | 54015143 |
| 11 | 54060772 | 54063402 - | NM_009969    | Csf2          | -7113 | 54070515 | 54070715 |
| 11 | 54117326 | 54175042 + | NM_001033598 | Acsl6         | 5097  | 54122423 | 54122623 |
| 11 | 54117326 | 54175042 + | NM_001033598 | Acsl6         | 52660 | 54169986 | 54170186 |
| 11 | 54117706 | 54175042 + | NM_001033597 | Acsl6         | 4717  | 54122423 | 54122623 |
| 11 | 54117706 | 54175042 + | NM_001033597 | Acsl6         | 52280 | 54169986 | 54170186 |
| 11 | 54117706 | 54175042 + | NM_144823    | Acsl6         | 4717  | 54122423 | 54122623 |
| 11 | 54117706 | 54175042 + | NM_144823    | Acsl6         | 52280 | 54169986 | 54170186 |
| 11 | 54128405 | 54175042 + | NM_001033599 | Acsl6         | -5782 | 54122423 | 54122623 |
| 11 | 54128405 | 54175042 + | NM_001033599 | Acsl6         | 41581 | 54169986 | 54170186 |
| 11 | 54251681 | 54331744 + | NM_173753    | Fnip1         | 1343  | 54253024 | 54253224 |
| 11 | 54251681 | 54331744 + | NM_173753    | Fnip1         | 64818 | 54316499 | 54316699 |
| 11 | 54336347 | 54512789 + | NM_001252494 | Rapgef6       | 355   | 54336702 | 54336902 |
| 11 | 54336347 | 54512789 + | NM_001252496 | Rapgef6       | 355   | 54336702 | 54336902 |
| 11 | 54336347 | 54512789 + | NM_175258    | Rapgef6       | 355   | 54336702 | 54336902 |
| 11 | 54530917 | 54601206 - | NM_178626    | Cdc42se2      | -973  | 54602179 | 54602379 |
| 11 | 54633421 | 54638470 + | NR_040284    | Lym7os        | -6520 | 54626701 | 54626901 |
| 11 | 54633421 | 54638470 + | NR_040284    | Lym7os        | -5918 | 54627303 | 54627503 |
| 11 | 54652791 | 54674094 - | NM_029327    | Lym7          | -6302 | 54680396 | 54680596 |
| 11 | 54652791 | 54674094 - | NM_029327    | Lym7          | -7410 | 54681504 | 54681704 |
| 11 | 54679940 | 54683999 + | NM_008248    | Hint1         | 456   | 54680396 | 54680596 |
| 11 | 54679940 | 54683999 + | NM_008248    | Hint1         | 1564  | 54681504 | 54681704 |
| 11 | 54716356 | 54723885 + | NM_008161    | Gpx3          | 1210  | 54717566 | 54717766 |
| 11 | 54724289 | 54776443 - | NM_001199275 | Tnip1         | 3983  | 54772260 | 54772460 |
| 11 | 54724289 | 54776443 - | NM_001199276 | Tnip1         | 3983  | 54772260 | 54772460 |

|    |          |            |              |               |        |          |          |
|----|----------|------------|--------------|---------------|--------|----------|----------|
| 11 | 54724289 | 54776443 - | NM_001271455 | Tnip1         | 3983   | 54772260 | 54772460 |
| 11 | 54724289 | 54776443 - | NM_001271456 | Tnip1         | 3983   | 54772260 | 54772460 |
| 11 | 54724289 | 54776443 - | NM_021327    | Tnip1         | 3983   | 54772260 | 54772460 |
| 11 | 54911487 | 54926531 + | NM_010299    | Gm2a          | -4563  | 54906724 | 54906924 |
| 11 | 54938325 | 54965209 - | NM_172258    | Slc36a3       | 23511  | 54941498 | 54941698 |
| 11 | 55017842 | 55049833 + | NM_153139    | Slc36a1       | 11107  | 55028949 | 55029149 |
| 11 | 55017842 | 55049833 + | NM_153139    | Slc36a1       | 14523  | 55032365 | 55032565 |
| 11 | 55017842 | 55049833 + | NM_153139    | Slc36a1       | 13282  | 55031124 | 55031324 |
| 11 | 55017842 | 55049833 + | NM_153139    | Slc36a1       | 9108   | 55026950 | 55027150 |
| 11 | 55207661 | 55233583 - | NM_001290817 | Sparc         | -8829  | 55242412 | 55242612 |
| 11 | 55207661 | 55233583 - | NM_009242    | Sparc         | -8829  | 55242412 | 55242612 |
| 11 | 57296492 | 57332147 - | NM_001168667 | Fam114a2      | -6003  | 57338150 | 57338350 |
| 11 | 57296492 | 57332147 - | NM_001168668 | Fam114a2      | -6003  | 57338150 | 57338350 |
| 11 | 57296492 | 57332147 - | NM_026342    | Fam114a2      | -6003  | 57338150 | 57338350 |
| 11 | 57332167 | 57347320 + | NM_145426    | Mfap3         | 5983   | 57338150 | 57338350 |
| 11 | 57332167 | 57347320 + | NM_180599    | Mfap3         | 5983   | 57338150 | 57338350 |
| 11 | 57458944 | 57601003 + | NM_134189    | Galnt10       | 46609  | 57505553 | 57505753 |
| 11 | 57458944 | 57601003 + | NM_134189    | Galnt10       | 121403 | 57580347 | 57580547 |
| 11 | 57458944 | 57601003 + | NM_134189    | Galnt10       | 124452 | 57583396 | 57583596 |
| 11 | 57458944 | 57601003 + | NM_134189    | Galnt10       | 89048  | 57547992 | 57548192 |
| 11 | 57458944 | 57601003 + | NM_134189    | Galnt10       | 81672  | 57540616 | 57540816 |
| 11 | 57458944 | 57601003 + | NM_134189    | Galnt10       | -82    | 57458662 | 57458862 |
| 11 | 58120571 | 58128116 + | NM_001040686 | Zfp692        | -5402  | 58114969 | 58115169 |
| 11 | 58120571 | 58128116 + | NM_182996    | Zfp692        | -5402  | 58114969 | 58115169 |
| 11 | 58192534 | 58204044 + | NM_001083884 | Lypd8         | -1349  | 58190985 | 58191185 |
| 11 | 58192534 | 58204044 + | NM_027339    | Lypd8         | -1349  | 58190985 | 58191185 |
| 11 | 58234613 | 58239526 + | NM_027239    | 1810065E05Rik | -6061  | 58228352 | 58228552 |
| 11 | 58303221 | 58306002 - | NM_001011770 | Olfpr332      | -4365  | 58310367 | 58310567 |
| 11 | 58379901 | 58380846 - | NM_207695    | Olfpr224      | -9298  | 58390144 | 58390344 |
| 11 | 58394339 | 58395380 + | NM_207153    | Olfpr325      | -3995  | 58390144 | 58390344 |

|    |          |            |              |               |       |          |          |
|----|----------|------------|--------------|---------------|-------|----------|----------|
| 11 | 58410847 | 58411969 + | NM_001011743 | Olfr324       | -6726 | 58403921 | 58404121 |
| 11 | 58410847 | 58411969 + | NM_001011743 | Olfr324       | -6034 | 58404613 | 58404813 |
| 11 | 58421708 | 58426995 - | NM_144544    | 2210407C18Rik | -1160 | 58428155 | 58428355 |
| 11 | 58421708 | 58426995 - | NM_144544    | 2210407C18Rik | -4759 | 58431754 | 58431954 |
| 11 | 58421708 | 58426995 - | NM_144544    | 2210407C18Rik | 3816  | 58422979 | 58423179 |
| 11 | 58680742 | 58697841 + | NM_172403    | 2810021J22Rik | 284   | 58681026 | 58681226 |
| 11 | 58745790 | 58752409 - | NM_022423    | Rnf187        | -187  | 58752596 | 58752796 |
| 11 | 58745790 | 58752409 - | NM_022423    | Rnf187        | -9696 | 58762105 | 58762305 |
| 11 | 58745790 | 58752409 - | NM_022423    | Rnf187        | -9090 | 58761499 | 58761699 |
| 11 | 58762413 | 58762875 + | NM_030082    | Hist3h2ba     | -9617 | 58752596 | 58752796 |
| 11 | 58762413 | 58762875 + | NM_030082    | Hist3h2ba     | -108  | 58762105 | 58762305 |
| 11 | 58762413 | 58762875 + | NM_030082    | Hist3h2ba     | -714  | 58761499 | 58761699 |
| 11 | 58768187 | 58768695 + | NM_178218    | Hist3h2a      | -5882 | 58762105 | 58762305 |
| 11 | 58768187 | 58768695 + | NM_178218    | Hist3h2a      | -6488 | 58761499 | 58761699 |
| 11 | 58989066 | 58996716 - | NM_080454    | Gjc2          | -638  | 58997354 | 58997554 |
| 11 | 58989066 | 58996329 - | NM_175452    | Gjc2          | -1025 | 58997354 | 58997554 |
| 11 | 58997357 | 59001244 - | NM_001159410 | Guk1          | 3690  | 58997354 | 58997554 |
| 11 | 58997357 | 59005455 - | NM_008193    | Guk1          | 7901  | 58997354 | 58997554 |
| 11 | 59011295 | 59015934 - | NR_037964    | 2610507I01Rik | -5637 | 59021571 | 59021771 |
| 11 | 59011295 | 59015934 - | NR_037964    | 2610507I01Rik | -8693 | 59024627 | 59024827 |
| 11 | 59021863 | 59024237 + | NM_024210    | 2310033P09Rik | -92   | 59021571 | 59021771 |
| 11 | 59021863 | 59024237 + | NM_024210    | 2310033P09Rik | 2764  | 59024627 | 59024827 |
| 11 | 59024914 | 59041665 - | NM_001130408 | Arf1          | 2533  | 59038932 | 59039132 |
| 11 | 59024914 | 59041770 - | NM_007476    | Arf1          | 2638  | 59038932 | 59039132 |
| 11 | 59274699 | 59285977 - | NM_178417    | Zfp867        | -100  | 59286077 | 59286277 |
| 11 | 59661575 | 59690036 + | NM_134029    | Nt5m          | 6313  | 59667888 | 59668088 |
| 11 | 59661575 | 59690036 + | NM_134029    | Nt5m          | 16332 | 59677907 | 59678107 |
| 11 | 59735001 | 59735392 + | NR_130986    | 1810063I02Rik | -3195 | 59731606 | 59731806 |
| 11 | 59761716 | 59776809 + | NM_138675    | Med9          | -7335 | 59754181 | 59754381 |
| 11 | 59776685 | 59778445 - | NM_009026    | Rasd1         | -742  | 59779187 | 59779387 |

|    |          |            |              |         |        |          |          |
|----|----------|------------|--------------|---------|--------|----------|----------|
| 11 | 59784116 | 59859992 - | NM_001290011 | Pemt    | 0      | 59859959 | 59860159 |
| 11 | 59784116 | 59859992 - | NM_001290012 | Pemt    | 0      | 59859959 | 59860159 |
| 11 | 59784116 | 59853691 - | NM_001290013 | Pemt    | -6268  | 59859959 | 59860159 |
| 11 | 59784116 | 59853691 - | NM_001290014 | Pemt    | -6268  | 59859959 | 59860159 |
| 11 | 59784116 | 59850508 - | NM_008819    | Pemt    | -9451  | 59859959 | 59860159 |
| 11 | 60012591 | 60034107 - | NM_011480    | Srebf1  | 2792   | 60031115 | 60031315 |
| 11 | 60012591 | 60034107 - | NM_011480    | Srebf1  | -9982  | 60044089 | 60044289 |
| 11 | 60012591 | 60034107 - | NM_011480    | Srebf1  | 20981  | 60012926 | 60013126 |
| 11 | 60014040 | 60014120 - | NR_105886    | Mir6921 | 994    | 60012926 | 60013126 |
| 11 | 60015764 | 60015830 - | NR_105887    | Mir6922 | 2704   | 60012926 | 60013126 |
| 11 | 60040216 | 60166408 - | NM_001039092 | Tom1l2  | 110985 | 60055223 | 60055423 |
| 11 | 60040216 | 60166408 - | NM_001039092 | Tom1l2  | 877    | 60165331 | 60165531 |
| 11 | 60040216 | 60166408 - | NM_001039092 | Tom1l2  | 108108 | 60058100 | 60058300 |
| 11 | 60040216 | 60166408 - | NM_001039092 | Tom1l2  | 118968 | 60047240 | 60047440 |
| 11 | 60040216 | 60166408 - | NM_001039092 | Tom1l2  | 112076 | 60054132 | 60054332 |
| 11 | 60040216 | 60166408 - | NM_001039092 | Tom1l2  | 122119 | 60044089 | 60044289 |
| 11 | 60040216 | 60166408 - | NM_153080    | Tom1l2  | 110985 | 60055223 | 60055423 |
| 11 | 60040216 | 60166408 - | NM_153080    | Tom1l2  | 877    | 60165331 | 60165531 |
| 11 | 60040216 | 60166408 - | NM_153080    | Tom1l2  | 108108 | 60058100 | 60058300 |
| 11 | 60040216 | 60166408 - | NM_153080    | Tom1l2  | 118968 | 60047240 | 60047440 |
| 11 | 60040216 | 60166408 - | NM_153080    | Tom1l2  | 112076 | 60054132 | 60054332 |
| 11 | 60040216 | 60166408 - | NM_153080    | Tom1l2  | 122119 | 60044089 | 60044289 |
| 11 | 60054072 | 60166408 - | NM_001039093 | Tom1l2  | 110985 | 60055223 | 60055423 |
| 11 | 60054072 | 60166408 - | NM_001039093 | Tom1l2  | 877    | 60165331 | 60165531 |
| 11 | 60054072 | 60166408 - | NM_001039093 | Tom1l2  | 108108 | 60058100 | 60058300 |
| 11 | 60054072 | 60166408 - | NM_001039093 | Tom1l2  | 112076 | 60054132 | 60054332 |
| 11 | 60166882 | 60207836 + | NM_029044    | Lrrc48  | 24888  | 60191770 | 60191970 |
| 11 | 60166882 | 60207836 + | NM_029044    | Lrrc48  | -1351  | 60165331 | 60165531 |
| 11 | 60214126 | 60230602 - | NM_145427    | Atpaf2  | -1491  | 60232093 | 60232293 |
| 11 | 60214126 | 60230602 - | NM_145427    | Atpaf2  | 4682   | 60225720 | 60225920 |

|    |          |            |              |          |        |          |          |
|----|----------|------------|--------------|----------|--------|----------|----------|
| 11 | 60230647 | 60258780 + | NM_025757    | Gid4     | 1446   | 60232093 | 60232293 |
| 11 | 60230647 | 60258780 + | NM_025757    | Gid4     | 10645  | 60241292 | 60241492 |
| 11 | 60230647 | 60258780 + | NM_025757    | Gid4     | -4727  | 60225720 | 60225920 |
| 11 | 60282841 | 60341871 + | NM_001103171 | Myo15    | 17061  | 60299902 | 60300102 |
| 11 | 60282841 | 60341871 + | NM_010862    | Myo15    | 17061  | 60299902 | 60300102 |
| 11 | 60282841 | 60341871 + | NM_182698    | Myo15    | 17061  | 60299902 | 60300102 |
| 11 | 60351185 | 60372015 + | NM_172943    | Alkbh5   | 1711   | 60352896 | 60353096 |
| 11 | 60527649 | 60540766 - | NM_001302207 | Flii     | -892   | 60541658 | 60541858 |
| 11 | 60527649 | 60540766 - | NM_022009    | Flii     | -892   | 60541658 | 60541858 |
| 11 | 60541900 | 60546454 + | NM_001009927 | Mief2    | -42    | 60541658 | 60541858 |
| 11 | 60542165 | 60542229 + | NR_039559    | Mir5100  | -307   | 60541658 | 60541858 |
| 11 | 60677954 | 60692541 - | NM_001168507 | Tmem11   | -588   | 60693129 | 60693329 |
| 11 | 60677954 | 60692541 - | NM_173453    | Tmem11   | -588   | 60693129 | 60693329 |
| 11 | 60734443 | 60745370 - | NR_027800    | Map2k3os | -3006  | 60748376 | 60748576 |
| 11 | 60745559 | 60766306 + | NM_008928    | Map2k3   | 2817   | 60748376 | 60748576 |
| 11 | 61058254 | 61080689 - | NM_007437    | Aldh3a2  | -4618  | 61085307 | 61085507 |
| 11 | 61156902 | 61191578 - | NM_026183    | Slc47a1  | 8392   | 61182986 | 61183186 |
| 11 | 61466823 | 61486280 + | NM_027817    | Grap     | 14980  | 61481803 | 61482003 |
| 11 | 61466823 | 61486280 + | NM_027817    | Grap     | 9378   | 61476201 | 61476401 |
| 11 | 61486284 | 61534302 - | NM_001033227 | Slc5a10  | 34338  | 61499764 | 61499964 |
| 11 | 61486284 | 61534302 - | NM_001033227 | Slc5a10  | 14372  | 61519730 | 61519930 |
| 11 | 61486284 | 61534302 - | NM_001033227 | Slc5a10  | 20448  | 61513654 | 61513854 |
| 11 | 61486284 | 61534302 - | NM_001033227 | Slc5a10  | 45271  | 61488831 | 61489031 |
| 11 | 61497912 | 61523453 + | NM_178618    | Fam83g   | 1852   | 61499764 | 61499964 |
| 11 | 61497912 | 61523453 + | NM_178618    | Fam83g   | 21818  | 61519730 | 61519930 |
| 11 | 61497912 | 61523453 + | NM_178618    | Fam83g   | 15742  | 61513654 | 61513854 |
| 11 | 61497912 | 61523453 + | NM_178618    | Fam83g   | -8881  | 61488831 | 61489031 |
| 11 | 61770265 | 62036516 + | NM_001281818 | Specc1   | 93455  | 61863720 | 61863920 |
| 11 | 61770265 | 62036516 + | NM_001281818 | Specc1   | 256955 | 62027220 | 62027420 |
| 11 | 61770265 | 62036516 + | NM_001281818 | Specc1   | 224241 | 61994506 | 61994706 |

|    |          |            |              |         |        |          |          |
|----|----------|------------|--------------|---------|--------|----------|----------|
| 11 | 61770265 | 62036516 + | NM_001281818 | Specc1  | 164774 | 61935039 | 61935239 |
| 11 | 61770265 | 62036516 + | NM_001281818 | Specc1  | 32421  | 61802686 | 61802886 |
| 11 | 61770265 | 61955229 + | NM_001310526 | Specc1  | 93455  | 61863720 | 61863920 |
| 11 | 61770265 | 61955229 + | NM_001310526 | Specc1  | 164774 | 61935039 | 61935239 |
| 11 | 61770265 | 61955229 + | NM_001310526 | Specc1  | 32421  | 61802686 | 61802886 |
| 11 | 61890526 | 62036516 + | NM_001029936 | Specc1  | 136694 | 62027220 | 62027420 |
| 11 | 61890526 | 62036516 + | NM_001029936 | Specc1  | 103980 | 61994506 | 61994706 |
| 11 | 61890526 | 62036516 + | NM_001029936 | Specc1  | 44513  | 61935039 | 61935239 |
| 11 | 62062486 | 62079955 + | NM_007413    | Adora2b | 15196  | 62077682 | 62077882 |
| 11 | 62062486 | 62079955 + | NM_007413    | Adora2b | 271    | 62062757 | 62062957 |
| 11 | 62080726 | 62094898 - | NM_027198    | Zswim7  | 3097   | 62091601 | 62091801 |
| 11 | 62094975 | 62129927 + | NM_028360    | Ttc19   | -3174  | 62091601 | 62091801 |
| 11 | 62094975 | 62129944 + | NM_029704    | Ttc19   | -3174  | 62091601 | 62091801 |
| 11 | 62129928 | 62252018 - | NM_001252313 | Ncor1   | 113813 | 62138005 | 62138205 |
| 11 | 62129928 | 62252018 - | NM_001252313 | Ncor1   | -2928  | 62254946 | 62255146 |
| 11 | 62129928 | 62252018 - | NM_001252313 | Ncor1   | 63664  | 62188154 | 62188354 |
| 11 | 62129928 | 62252018 - | NM_011308    | Ncor1   | 113813 | 62138005 | 62138205 |
| 11 | 62129928 | 62252018 - | NM_011308    | Ncor1   | -2928  | 62254946 | 62255146 |
| 11 | 62129928 | 62252018 - | NM_011308    | Ncor1   | 63664  | 62188154 | 62188354 |
| 11 | 62214879 | 62270835 - | NM_177229    | Ncor1   | 15689  | 62254946 | 62255146 |
| 11 | 62271962 | 62327403 + | NM_001039536 | Pigl    | 37663  | 62309625 | 62309825 |
| 11 | 62271962 | 62327403 + | NM_001039536 | Pigl    | 28577  | 62300539 | 62300739 |
| 11 | 62271962 | 62327403 + | NM_001039536 | Pigl    | 29408  | 62301370 | 62301570 |
| 11 | 62338446 | 62352764 - | NM_028448    | Cenpv   | 597    | 62351967 | 62352167 |
| 11 | 62365006 | 62366715 + | NM_011664    | Ubb     | 2585   | 62367591 | 62367791 |
| 11 | 62418386 | 62462026 - | NM_198861    | Lrrc75a | 23499  | 62438327 | 62438527 |
| 11 | 62418386 | 62462026 - | NM_198861    | Lrrc75a | 6391   | 62455435 | 62455635 |
| 11 | 62418386 | 62462026 - | NM_198861    | Lrrc75a | 18968  | 62442858 | 62443058 |
| 11 | 62462166 | 62479862 + | NM_175002    | Mmgt2   | -6531  | 62455435 | 62455635 |
| 11 | 62692992 | 62708687 + | NM_026210    | Tvp23b  | 331    | 62693323 | 62693523 |

|    |          |            |              |               |        |          |          |
|----|----------|------------|--------------|---------------|--------|----------|----------|
| 11 | 62764695 | 62806598 + | NM_025496    | Cdrt4         | 35421  | 62800116 | 62800316 |
| 11 | 62875161 | 62908463 + | NM_027660    | Tekt3         | -6758  | 62868203 | 62868403 |
| 11 | 63776129 | 63892975 - | NM_178379    | Cox10         | 75617  | 63817158 | 63817358 |
| 11 | 63776129 | 63892975 - | NM_178379    | Cox10         | 53286  | 63839489 | 63839689 |
| 11 | 64815541 | 64976464 - | NM_001099288 | Arhgap44      | 67888  | 64908376 | 64908576 |
| 11 | 64815541 | 64976464 - | NM_175003    | Arhgap44      | 67888  | 64908376 | 64908576 |
| 11 | 65501746 | 65601800 - | NM_009157    | Map2k4        | 10659  | 65590941 | 65591141 |
| 11 | 65501746 | 65601800 - | NM_009157    | Map2k4        | -6604  | 65608404 | 65608604 |
| 11 | 66719134 | 66760589 - | NR_033539    | Gm12298       | 40777  | 66719612 | 66719812 |
| 11 | 66725493 | 66742203 + | NM_178656    | Pirt          | -5681  | 66719612 | 66719812 |
| 11 | 66770140 | 66778517 + | NR_130315    | 9130409J20Rik | 4848   | 66774988 | 66775188 |
| 11 | 66770140 | 66778517 + | NR_130315    | 9130409J20Rik | 3439   | 66773579 | 66773779 |
| 11 | 66770140 | 66778517 + | NR_130645    | 9130409J20Rik | 4848   | 66774988 | 66775188 |
| 11 | 66770140 | 66778517 + | NR_130645    | 9130409J20Rik | 3439   | 66773579 | 66773779 |
| 11 | 66771396 | 66778517 + | NR_130646    | 9130409J20Rik | 3592   | 66774988 | 66775188 |
| 11 | 66771396 | 66778517 + | NR_130646    | 9130409J20Rik | 2183   | 66773579 | 66773779 |
| 11 | 66838656 | 66848815 + | NM_001291042 | Tmem220       | 6223   | 66844879 | 66845079 |
| 11 | 66838656 | 66848815 + | NM_001291043 | Tmem220       | 6223   | 66844879 | 66845079 |
| 11 | 66838656 | 66848815 + | NM_177392    | Tmem220       | 6223   | 66844879 | 66845079 |
| 11 | 66891802 | 66915794 + | NM_001099635 | Myh3          | 13363  | 66905165 | 66905365 |
| 11 | 66891802 | 66915794 + | NM_001099635 | Myh3          | 2532   | 66894334 | 66894534 |
| 11 | 66913306 | 66913378 + | NR_105888    | Mir6923       | -7941  | 66905165 | 66905365 |
| 11 | 67346500 | 67502495 + | NM_008088    | Gas7          | 29561  | 67376061 | 67376261 |
| 11 | 67668025 | 67735656 - | NM_001291049 | Usp43         | 7249   | 67728207 | 67728407 |
| 11 | 67668025 | 67735656 - | NM_001291049 | Usp43         | 61110  | 67674346 | 67674546 |
| 11 | 67668025 | 67735656 - | NM_173754    | Usp43         | 7249   | 67728207 | 67728407 |
| 11 | 67668025 | 67735656 - | NM_173754    | Usp43         | 61110  | 67674346 | 67674546 |
| 11 | 67779985 | 68020651 + | NM_018768    | Stx8          | 68054  | 67848039 | 67848239 |
| 11 | 67779985 | 68020651 + | NM_018768    | Stx8          | 236015 | 68016000 | 68016200 |
| 11 | 67779985 | 68020651 + | NM_018768    | Stx8          | 67329  | 67847314 | 67847514 |

|    |          |            |              |               |       |          |          |
|----|----------|------------|--------------|---------------|-------|----------|----------|
| 11 | 68245627 | 68311349 + | NM_177320    | Pik3r5        | 53176 | 68298803 | 68299003 |
| 11 | 68316521 | 68366198 + | NM_001004435 | Pik3r6        | -1792 | 68314529 | 68314729 |
| 11 | 68316521 | 68366198 + | NM_001081566 | Pik3r6        | -1792 | 68314529 | 68314729 |
| 11 | 68316521 | 68366198 + | NR_126153    | Pik3r6        | -1792 | 68314529 | 68314729 |
| 11 | 68316521 | 68366198 + | NR_126154    | Pik3r6        | -1792 | 68314529 | 68314729 |
| 11 | 68859145 | 68865165 + | NM_011496    | Aurkb         | -8269 | 68850676 | 68850876 |
| 11 | 68873277 | 68875079 + | NM_028005    | 2310047M10Rik | 2438  | 68875715 | 68875915 |
| 11 | 68884311 | 68886796 + | NM_025838    | Tmem107       | -2907 | 68881204 | 68881404 |
| 11 | 68884311 | 68886796 + | NM_025838    | Tmem107       | 2660  | 68886971 | 68887171 |
| 11 | 68884311 | 68886796 + | NM_025838    | Tmem107       | -8396 | 68875715 | 68875915 |
| 11 | 68884311 | 68886796 + | NM_025838    | Tmem107       | -4130 | 68879981 | 68880181 |
| 11 | 68884311 | 68886796 + | NM_028336    | Tmem107       | -2907 | 68881204 | 68881404 |
| 11 | 68884311 | 68886796 + | NM_028336    | Tmem107       | 2660  | 68886971 | 68887171 |
| 11 | 68884311 | 68886796 + | NM_028336    | Tmem107       | -8396 | 68875715 | 68875915 |
| 11 | 68884311 | 68886796 + | NM_028336    | Tmem107       | -4130 | 68879981 | 68880181 |
| 11 | 68902030 | 68905884 + | NM_009497    | Vamp2         | -179  | 68901651 | 68901851 |
| 11 | 68933955 | 68936762 + | NM_033041    | Hes7          | -3045 | 68930710 | 68930910 |
| 11 | 68939879 | 68962618 + | NM_011786    | Aloxe3        | -8969 | 68930710 | 68930910 |
| 11 | 69156775 | 69182929 - | NM_146019    | Chd3          | 2658  | 69180071 | 69180271 |
| 11 | 69212020 | 69227178 - | NM_001017426 | Kdm6b         | 4464  | 69222514 | 69222714 |
| 11 | 69234311 | 69362611 - | NM_001081330 | Dnah2         | 89617 | 69272794 | 69272994 |
| 11 | 69234311 | 69362611 - | NM_001081330 | Dnah2         | 79452 | 69282959 | 69283159 |
| 11 | 69375256 | 69392827 - | NM_144824    | Wrap53        | -6519 | 69399346 | 69399546 |
| 11 | 69393861 | 69405376 + | NM_001127233 | Trp53         | 5485  | 69399346 | 69399546 |
| 11 | 69393861 | 69405376 + | NM_011640    | Trp53         | 5485  | 69399346 | 69399546 |
| 11 | 69446473 | 69466800 + | NM_011814    | Fxr2          | 2604  | 69449077 | 69449277 |
| 11 | 69448902 | 69449022 - | NR_035420    | Mir467f       | -55   | 69449077 | 69449277 |
| 11 | 69486612 | 69495587 - | NM_001163571 | Senp3         | -2006 | 69497593 | 69497793 |
| 11 | 69486612 | 69495473 - | NM_030702    | Senp3         | -2120 | 69497593 | 69497793 |
| 11 | 69496079 | 69499057 - | NM_001159505 | Tnfsf13       | 1264  | 69497593 | 69497793 |



|    |          |            |              |          |       |          |          |
|----|----------|------------|--------------|----------|-------|----------|----------|
| 11 | 69496079 | 69499057 - | NM_023517    | Tnfsf13  | 1264  | 69497593 | 69497793 |
| 11 | 69496079 | 69509601 - | NM_001034097 | Tnfsfm13 | 11808 | 69497593 | 69497793 |
| 11 | 69496079 | 69509601 - | NM_001034097 | Tnfsfm13 | -1492 | 69511093 | 69511293 |
| 11 | 69496079 | 69509601 - | NM_001159503 | Tnfsfm13 | 11808 | 69497593 | 69497793 |
| 11 | 69496079 | 69509601 - | NM_001159503 | Tnfsfm13 | -1492 | 69511093 | 69511293 |
| 11 | 69499742 | 69509601 - | NM_011614    | Tnfsf12  | -1492 | 69511093 | 69511293 |
| 11 | 69547501 | 69572136 - | NM_001291068 | Polr2a   | 6658  | 69565278 | 69565478 |
| 11 | 69755788 | 69761693 - | NM_009204    | Slc2a4   | -8162 | 69769855 | 69770055 |
| 11 | 69755788 | 69761693 - | NM_009204    | Slc2a4   | -5432 | 69767125 | 69767325 |
| 11 | 69755788 | 69761693 - | NM_009204    | Slc2a4   | -1184 | 69762877 | 69763077 |
| 11 | 69778281 | 69781389 + | NM_001193619 | Cldn7    | 1654  | 69779935 | 69780135 |
| 11 | 69778281 | 69781389 + | NM_001193619 | Cldn7    | -8226 | 69769855 | 69770055 |
| 11 | 69778281 | 69781389 + | NM_001193619 | Cldn7    | -3535 | 69774546 | 69774746 |
| 11 | 69778923 | 69781389 + | NM_016887    | Cldn7    | 1012  | 69779935 | 69780135 |
| 11 | 69778923 | 69781389 + | NM_016887    | Cldn7    | -8868 | 69769855 | 69770055 |
| 11 | 69778923 | 69781389 + | NM_016887    | Cldn7    | -4177 | 69774546 | 69774746 |
| 11 | 69781727 | 69793833 - | NM_001253700 | Elp5     | 233   | 69793400 | 69793600 |
| 11 | 69781727 | 69793833 - | NM_001253700 | Elp5     | 9679  | 69783954 | 69784154 |
| 11 | 69781727 | 69794738 - | NM_018740    | Elp5     | 1138  | 69793400 | 69793600 |
| 11 | 69781727 | 69794738 - | NM_018740    | Elp5     | -9826 | 69804564 | 69804764 |
| 11 | 69781727 | 69794738 - | NM_018740    | Elp5     | 10584 | 69783954 | 69784154 |
| 11 | 69794670 | 69804103 + | NM_026017    | Ctdnep1  | -1070 | 69793400 | 69793600 |
| 11 | 69804872 | 69808452 + | NM_019749    | Gabarap  | -108  | 69804564 | 69804764 |
| 11 | 69809268 | 69813514 + | NM_001291125 | Phf23    | -4504 | 69804564 | 69804764 |
| 11 | 69809268 | 69813514 + | NM_030064    | Phf23    | -4504 | 69804564 | 69804764 |
| 11 | 69810443 | 69813514 + | NM_001291126 | Phf23    | -5679 | 69804564 | 69804764 |
| 11 | 69810964 | 69813514 + | NM_001291127 | Phf23    | -6200 | 69804564 | 69804764 |
| 11 | 69814128 | 69823612 + | NM_007888    | Dvl2     | -9364 | 69804564 | 69804764 |
| 11 | 70030294 | 70034497 - | NM_172371    | Slc16a13 | -811  | 70035308 | 70035508 |
| 11 | 70030294 | 70034497 - | NM_172371    | Slc16a13 | 97    | 70034200 | 70034400 |

|    |          |            |              |               |       |          |          |
|----|----------|------------|--------------|---------------|-------|----------|----------|
| 11 | 70048194 | 70048319 - | NR_106178    | Mir497b       | -5116 | 70053435 | 70053635 |
| 11 | 70048706 | 70051417 - | NM_001177601 | 0610010K14Rik | -2018 | 70053435 | 70053635 |
| 11 | 70048706 | 70051417 - | NM_001177603 | 0610010K14Rik | -2018 | 70053435 | 70053635 |
| 11 | 70048706 | 70051417 - | NM_001177606 | 0610010K14Rik | -2018 | 70053435 | 70053635 |
| 11 | 70048706 | 70051417 - | NM_001177607 | 0610010K14Rik | -2018 | 70053435 | 70053635 |
| 11 | 70048706 | 70051417 - | NM_026757    | 0610010K14Rik | -2018 | 70053435 | 70053635 |
| 11 | 70048706 | 70051417 - | NM_145758    | 0610010K14Rik | -2018 | 70053435 | 70053635 |
| 11 | 70051625 | 70053355 - | NM_173742    | Rnasek        | -80   | 70053435 | 70053635 |
| 11 | 70318776 | 70324687 + | NM_029360    | Tm4sf5        | 0     | 70318584 | 70318784 |
| 11 | 70318776 | 70324687 + | NM_029360    | Tm4sf5        | 4252  | 70323028 | 70323228 |
| 11 | 70318776 | 70324687 + | NM_029360    | Tm4sf5        | 1216  | 70319992 | 70320192 |
| 11 | 70318776 | 70324687 + | NM_029360    | Tm4sf5        | -3026 | 70315550 | 70315750 |
| 11 | 70332711 | 70334239 + | NM_146020    | Gltpd2        | -9483 | 70323028 | 70323228 |
| 11 | 70353774 | 70371613 + | NM_001302475 | Pld2          | 563   | 70354337 | 70354537 |
| 11 | 70353774 | 70359901 + | NM_001302476 | Pld2          | 563   | 70354337 | 70354537 |
| 11 | 70353774 | 70371613 + | NM_008876    | Pld2          | 563   | 70354337 | 70354537 |
| 11 | 70376383 | 70427985 + | NM_001045959 | Mink1         | 13459 | 70389842 | 70390042 |
| 11 | 70376383 | 70427985 + | NM_001045964 | Mink1         | 13459 | 70389842 | 70390042 |
| 11 | 70376383 | 70427985 + | NM_016713    | Mink1         | 13459 | 70389842 | 70390042 |
| 11 | 70376383 | 70427985 + | NM_176893    | Mink1         | 13459 | 70389842 | 70390042 |
| 11 | 70428385 | 70432697 - | NM_009603    | Chrne         | -3098 | 70435795 | 70435995 |
| 11 | 70457529 | 70460542 - | NM_024211    | Slc25a11      | -1422 | 70461964 | 70462164 |
| 11 | 70457529 | 70460542 - | NM_024211    | Slc25a11      | -8194 | 70468736 | 70468936 |
| 11 | 70461091 | 70464917 + | NM_027445    | Rnf167        | 873   | 70461964 | 70462164 |
| 11 | 70465349 | 70468153 - | NM_011072    | Pfn1          | -583  | 70468736 | 70468936 |
| 11 | 70470678 | 70476016 + | NM_001136062 | Eno3          | -8514 | 70461964 | 70462164 |
| 11 | 70470678 | 70476016 + | NM_001136062 | Eno3          | -1742 | 70468736 | 70468936 |
| 11 | 70470678 | 70476016 + | NM_001276285 | Eno3          | -8514 | 70461964 | 70462164 |
| 11 | 70470678 | 70476016 + | NM_001276285 | Eno3          | -1742 | 70468736 | 70468936 |
| 11 | 70470678 | 70476016 + | NM_007933    | Eno3          | -8514 | 70461964 | 70462164 |

|    |          |            |              |        |       |          |          |
|----|----------|------------|--------------|--------|-------|----------|----------|
| 11 | 70470678 | 70476016 + | NM_007933    | Eno3   | -1742 | 70468736 | 70468936 |
| 11 | 70477271 | 70482919 - | NM_001167669 | Spag7  | 740   | 70481979 | 70482179 |
| 11 | 70477271 | 70482919 - | NM_172561    | Spag7  | 740   | 70481979 | 70482179 |
| 11 | 70658263 | 70756608 + | NM_001291141 | Rabep1 | 21397 | 70679660 | 70679860 |
| 11 | 70658263 | 70756608 + | NM_001291141 | Rabep1 | -1507 | 70656556 | 70656756 |
| 11 | 70658263 | 70756608 + | NM_001291142 | Rabep1 | 21397 | 70679660 | 70679860 |
| 11 | 70658263 | 70756608 + | NM_001291142 | Rabep1 | -1507 | 70656556 | 70656756 |
| 11 | 70658263 | 70756608 + | NM_001291143 | Rabep1 | 21397 | 70679660 | 70679860 |
| 11 | 70658263 | 70756608 + | NM_001291143 | Rabep1 | -1507 | 70656556 | 70656756 |
| 11 | 70658263 | 70756608 + | NM_019400    | Rabep1 | 21397 | 70679660 | 70679860 |
| 11 | 70658263 | 70756608 + | NM_019400    | Rabep1 | -1507 | 70656556 | 70656756 |
| 11 | 70756560 | 70783476 - | NM_001083331 | Nup88  | 1150  | 70782126 | 70782326 |
| 11 | 70756560 | 70783476 - | NM_001083331 | Nup88  | -229  | 70783705 | 70783905 |
| 11 | 70756560 | 70783476 - | NM_001276406 | Nup88  | 1150  | 70782126 | 70782326 |
| 11 | 70756560 | 70783476 - | NM_001276406 | Nup88  | -229  | 70783705 | 70783905 |
| 11 | 70756560 | 70783476 - | NM_172394    | Nup88  | 1150  | 70782126 | 70782326 |
| 11 | 70756560 | 70783476 - | NM_172394    | Nup88  | -229  | 70783705 | 70783905 |
| 11 | 70756560 | 70783476 - | NR_075087    | Nup88  | 1150  | 70782126 | 70782326 |
| 11 | 70756560 | 70783476 - | NR_075087    | Nup88  | -229  | 70783705 | 70783905 |
| 11 | 70783702 | 70791436 + | NM_001252413 | Rpain  | -1376 | 70782126 | 70782326 |
| 11 | 70783702 | 70791436 + | NM_001252413 | Rpain  | 3     | 70783705 | 70783905 |
| 11 | 70783702 | 70791436 + | NM_001252414 | Rpain  | -1376 | 70782126 | 70782326 |
| 11 | 70783702 | 70791436 + | NM_001252414 | Rpain  | 3     | 70783705 | 70783905 |
| 11 | 70783702 | 70791436 + | NM_001252415 | Rpain  | -1376 | 70782126 | 70782326 |
| 11 | 70783702 | 70791436 + | NM_001252415 | Rpain  | 3     | 70783705 | 70783905 |
| 11 | 70783702 | 70791436 + | NM_027186    | Rpain  | -1376 | 70782126 | 70782326 |
| 11 | 70783702 | 70791436 + | NM_027186    | Rpain  | 3     | 70783705 | 70783905 |
| 11 | 70966604 | 71044236 - | NM_001040696 | Nlrp1b | 46094 | 70997942 | 70998142 |
| 11 | 70966604 | 71044236 - | NM_001040696 | Nlrp1b | 28035 | 71016001 | 71016201 |
| 11 | 70966604 | 71044236 - | NM_001040696 | Nlrp1b | 31220 | 71012816 | 71013016 |

|    |          |            |              |               |        |          |          |
|----|----------|------------|--------------|---------------|--------|----------|----------|
| 11 | 70966604 | 71014959 - | NM_001162414 | Nlrp1b        | 16817  | 70997942 | 70998142 |
| 11 | 70966604 | 71014959 - | NM_001162414 | Nlrp1b        | -1042  | 71016001 | 71016201 |
| 11 | 70966604 | 71014959 - | NM_001162414 | Nlrp1b        | 1943   | 71012816 | 71013016 |
| 11 | 72115131 | 72127236 + | NM_001037713 | Xaf1          | -593   | 72114338 | 72114538 |
| 11 | 72115131 | 72127236 + | NM_001291153 | Xaf1          | -593   | 72114338 | 72114538 |
| 11 | 72254880 | 72265053 + | NM_016776    | Mybbp1a       | 5044   | 72259924 | 72260124 |
| 11 | 72265140 | 72288530 - | NM_001276383 | Spns2         | -7018  | 72295548 | 72295748 |
| 11 | 72265140 | 72288530 - | NM_001276383 | Spns2         | -14    | 72288544 | 72288744 |
| 11 | 72265140 | 72303423 - | NM_153060    | Spns2         | 7675   | 72295548 | 72295748 |
| 11 | 72265140 | 72303423 - | NM_153060    | Spns2         | -6936  | 72310359 | 72310559 |
| 11 | 72265140 | 72303423 - | NM_153060    | Spns2         | 14679  | 72288544 | 72288744 |
| 11 | 72311658 | 72363749 - | NM_029932    | Spns3         | 45732  | 72317817 | 72318017 |
| 11 | 72590734 | 72609342 - | NM_001024926 | Cyb5d2        | -7671  | 72617013 | 72617213 |
| 11 | 72590734 | 72609342 - | NM_001024926 | Cyb5d2        | -5393  | 72614735 | 72614935 |
| 11 | 72609728 | 72740623 + | NM_001045536 | Zzef1         | 7285   | 72617013 | 72617213 |
| 11 | 72609728 | 72740623 + | NM_001045536 | Zzef1         | 5007   | 72614735 | 72614935 |
| 11 | 72904097 | 72960952 + | NM_008399    | Itgae         | 46172  | 72950269 | 72950469 |
| 11 | 72948986 | 72951797 - | NM_010353    | Gsg2          | 1328   | 72950269 | 72950469 |
| 11 | 73047651 | 73074825 + | NM_001001445 | Trpv1         | 7611   | 73055262 | 73055462 |
| 11 | 73118490 | 73138140 - | NM_023113    | Aspa          | 119    | 73137821 | 73138021 |
| 11 | 73118490 | 73138140 - | NM_023113    | Aspa          | 9622   | 73128318 | 73128518 |
| 11 | 73118490 | 73138140 - | NM_023113    | Aspa          | 3199   | 73134741 | 73134941 |
| 11 | 73143243 | 73159547 + | NM_001045531 | Spata22       | -5222  | 73137821 | 73138021 |
| 11 | 73143243 | 73159547 + | NM_001045531 | Spata22       | -8302  | 73134741 | 73134941 |
| 11 | 74196985 | 74403661 - | NM_001015046 | Rap1gap2      | 63640  | 74339821 | 74340021 |
| 11 | 74196985 | 74403661 - | NM_001015046 | Rap1gap2      | -7592  | 74411253 | 74411453 |
| 11 | 74196985 | 74403661 - | NM_001015046 | Rap1gap2      | 169798 | 74233663 | 74233863 |
| 11 | 74196985 | 74403661 - | NM_001015046 | Rap1gap2      | 85110  | 74318351 | 74318551 |
| 11 | 74196985 | 74403661 - | NM_001015046 | Rap1gap2      | 174628 | 74228833 | 74229033 |
| 11 | 74433107 | 74455019 + | NM_001013784 | E130309D14Rik | 4147   | 74437254 | 74437454 |

|    |          |            |              |         |        |          |          |
|----|----------|------------|--------------|---------|--------|----------|----------|
| 11 | 74584365 | 74632195 + | NM_026197    | Mettl16 | -9376  | 74574789 | 74574989 |
| 11 | 74644426 | 74659228 + | NM_010813    | Mnt     | -3829  | 74640397 | 74640597 |
| 11 | 74644426 | 74659228 + | NM_010813    | Mnt     | -4611  | 74639615 | 74639815 |
| 11 | 74739374 | 74977951 + | NM_001002764 | Smg6    | 136125 | 74875499 | 74875699 |
| 11 | 74739374 | 74977951 + | NM_001002764 | Smg6    | 36321  | 74775695 | 74775895 |
| 11 | 74978067 | 74981655 - | NM_001098203 | Hic1    | -5741  | 74987396 | 74987596 |
| 11 | 74978067 | 74983758 - | NM_010430    | Hic1    | -3638  | 74987396 | 74987596 |
| 11 | 74986890 | 74986981 + | NR_029794    | Mir212  | 506    | 74987396 | 74987596 |
| 11 | 74987184 | 74987250 + | NR_029546    | Mir132  | 212    | 74987396 | 74987596 |
| 11 | 75007495 | 75081265 + | NM_177708    | Rtn4rl1 | 11445  | 75018940 | 75019140 |
| 11 | 75007495 | 75081265 + | NM_177708    | Rtn4rl1 | 25883  | 75033378 | 75033578 |
| 11 | 75007495 | 75081265 + | NM_177708    | Rtn4rl1 | 21926  | 75029421 | 75029621 |
| 11 | 75007495 | 75081265 + | NM_177708    | Rtn4rl1 | 21494  | 75028989 | 75029189 |
| 11 | 75281552 | 75284402 + | NM_001291156 | Tlcd2   | 2555   | 75284107 | 75284307 |
| 11 | 75281552 | 75284402 + | NM_027249    | Tlcd2   | 2555   | 75284107 | 75284307 |
| 11 | 75345196 | 75391075 + | NM_001199284 | Slc43a2 | 36130  | 75381326 | 75381526 |
| 11 | 75345196 | 75391075 + | NM_001199284 | Slc43a2 | -1585  | 75343411 | 75343611 |
| 11 | 75345196 | 75391075 + | NM_001199284 | Slc43a2 | 3514   | 75348710 | 75348910 |
| 11 | 75345196 | 75391075 + | NM_173388    | Slc43a2 | 36130  | 75381326 | 75381526 |
| 11 | 75345196 | 75391075 + | NM_173388    | Slc43a2 | -1585  | 75343411 | 75343611 |
| 11 | 75345196 | 75391075 + | NM_173388    | Slc43a2 | 3514   | 75348710 | 75348910 |
| 11 | 75345614 | 75391075 + | NM_001199283 | Slc43a2 | 35712  | 75381326 | 75381526 |
| 11 | 75345614 | 75391075 + | NM_001199283 | Slc43a2 | -2003  | 75343411 | 75343611 |
| 11 | 75345614 | 75391075 + | NM_001199283 | Slc43a2 | 3096   | 75348710 | 75348910 |
| 11 | 75401610 | 75442281 + | NM_008850    | Pitpna  | 16858  | 75418468 | 75418668 |
| 11 | 75401610 | 75442281 + | NM_008850    | Pitpna  | 7328   | 75408938 | 75409138 |
| 11 | 75401610 | 75442281 + | NM_008850    | Pitpna  | 675    | 75402285 | 75402485 |
| 11 | 75413146 | 75413734 - | NR_110477    | Gm12338 | -4734  | 75418468 | 75418668 |
| 11 | 75444522 | 75462368 + | NM_008916    | Inpp5k  | 362    | 75444884 | 75445084 |
| 11 | 75492761 | 75521931 + | NM_001277219 | Crk     | -261   | 75492300 | 75492500 |

|    |          |            |              |        |       |          |          |
|----|----------|------------|--------------|--------|-------|----------|----------|
| 11 | 75492761 | 75521931 + | NM_001277219 | Crk    | 15911 | 75508672 | 75508872 |
| 11 | 75492761 | 75521931 + | NM_001277221 | Crk    | -261  | 75492300 | 75492500 |
| 11 | 75492761 | 75521931 + | NM_001277221 | Crk    | 15911 | 75508672 | 75508872 |
| 11 | 75492761 | 75521931 + | NM_133656    | Crk    | -261  | 75492300 | 75492500 |
| 11 | 75492761 | 75521931 + | NM_133656    | Crk    | 15911 | 75508672 | 75508872 |
| 11 | 75859728 | 75993133 - | NM_026664    | Vps53  | -4270 | 75997403 | 75997603 |
| 11 | 75859728 | 75993133 - | NM_026664    | Vps53  | -302  | 75993435 | 75993635 |
| 11 | 75859728 | 75993133 - | NM_026664    | Vps53  | 32942 | 75959991 | 75960191 |
| 11 | 76015558 | 76021760 + | NM_027773    | Fam57a | -5587 | 76009771 | 76009971 |
| 11 | 76024073 | 76031075 - | NM_177367    | Gemin4 | 638   | 76030237 | 76030437 |
| 11 | 76031115 | 76032168 + | NM_021294    | Dbil5  | -678  | 76030237 | 76030437 |
| 11 | 76230234 | 76322922 - | NM_198018    | Abr    | -1975 | 76324897 | 76325097 |
| 11 | 76230234 | 76322922 - | NM_198018    | Abr    | 25792 | 76296930 | 76297130 |
| 11 | 76230234 | 76322922 - | NM_198018    | Abr    | 4418  | 76318304 | 76318504 |
| 11 | 76230234 | 76322922 - | NM_198018    | Abr    | 30045 | 76292677 | 76292877 |
| 11 | 76230234 | 76391242 - | NM_198894    | Abr    | 66145 | 76324897 | 76325097 |
| 11 | 76230234 | 76391242 - | NM_198894    | Abr    | 94112 | 76296930 | 76297130 |
| 11 | 76230234 | 76391242 - | NM_198894    | Abr    | 72738 | 76318304 | 76318504 |
| 11 | 76230234 | 76391242 - | NM_198894    | Abr    | 98365 | 76292677 | 76292877 |
| 11 | 76230234 | 76384887 - | NM_198895    | Abr    | 59790 | 76324897 | 76325097 |
| 11 | 76230234 | 76384887 - | NM_198895    | Abr    | 87757 | 76296930 | 76297130 |
| 11 | 76230234 | 76384887 - | NM_198895    | Abr    | 66383 | 76318304 | 76318504 |
| 11 | 76230234 | 76384887 - | NM_198895    | Abr    | 92010 | 76292677 | 76292877 |
| 11 | 76590710 | 76660511 - | NM_007754    | Cpd    | 39413 | 76620898 | 76621098 |
| 11 | 76718047 | 76730089 + | NM_025655    | Tmigd1 | 7834  | 76725881 | 76726081 |
| 11 | 76718047 | 76730089 + | NM_025655    | Tmigd1 | 11960 | 76730007 | 76730207 |
| 11 | 76718047 | 76730089 + | NM_025655    | Tmigd1 | -5826 | 76712021 | 76712221 |
| 11 | 76759158 | 76800892 + | NM_178645    | Blmh   | 37944 | 76797102 | 76797302 |
| 11 | 76812099 | 76845846 + | NM_010484    | Slc6a4 | 23468 | 76835567 | 76835767 |
| 11 | 76812099 | 76845846 + | NM_010484    | Slc6a4 | 21048 | 76833147 | 76833347 |

|    |          |            |              |          |        |          |          |
|----|----------|------------|--------------|----------|--------|----------|----------|
| 11 | 76903417 | 77002471 - | NM_176965    | Efcab5   | -5815  | 77008286 | 77008486 |
| 11 | 77029927 | 77273722 + | NM_177710    | Ssh2     | 104910 | 77134837 | 77135037 |
| 11 | 77029927 | 77273722 + | NM_177710    | Ssh2     | 186203 | 77216130 | 77216330 |
| 11 | 77029927 | 77273722 + | NM_177710    | Ssh2     | 9162   | 77039089 | 77039289 |
| 11 | 77029927 | 77273722 + | NM_177710    | Ssh2     | 63810  | 77093737 | 77093937 |
| 11 | 77161782 | 77273722 + | NM_001291190 | Ssh2     | 54348  | 77216130 | 77216330 |
| 11 | 77283989 | 77303181 - | NM_172945    | Ankrd13b | 5895   | 77297086 | 77297286 |
| 11 | 77306914 | 77321277 + | NM_001004144 | Git1     | -9628  | 77297086 | 77297286 |
| 11 | 77321601 | 77326776 - | NM_001024920 | Trp53i13 | -1248  | 77328024 | 77328224 |
| 11 | 77328619 | 77334131 + | NM_026185    | Abhd15   | -395   | 77328024 | 77328224 |
| 11 | 77590737 | 77679491 + | NM_001291212 | Myo18a   | 6819   | 77597556 | 77597756 |
| 11 | 77590737 | 77679491 + | NM_001291212 | Myo18a   | 16169  | 77606906 | 77607106 |
| 11 | 77590737 | 77679491 + | NM_001291212 | Myo18a   | -4402  | 77586135 | 77586335 |
| 11 | 77590737 | 77679491 + | NM_001291212 | Myo18a   | -6567  | 77583970 | 77584170 |
| 11 | 77590737 | 77679491 + | NM_001291213 | Myo18a   | 6819   | 77597556 | 77597756 |
| 11 | 77590737 | 77679491 + | NM_001291213 | Myo18a   | 16169  | 77606906 | 77607106 |
| 11 | 77590737 | 77679491 + | NM_001291213 | Myo18a   | -4402  | 77586135 | 77586335 |
| 11 | 77590737 | 77679491 + | NM_001291213 | Myo18a   | -6567  | 77583970 | 77584170 |
| 11 | 77590737 | 77679491 + | NM_011586    | Myo18a   | 6819   | 77597556 | 77597756 |
| 11 | 77590737 | 77679491 + | NM_011586    | Myo18a   | 16169  | 77606906 | 77607106 |
| 11 | 77590737 | 77679491 + | NM_011586    | Myo18a   | -4402  | 77586135 | 77586335 |
| 11 | 77590737 | 77679491 + | NM_011586    | Myo18a   | -6567  | 77583970 | 77584170 |
| 11 | 77614800 | 77679491 + | NM_001291214 | Myo18a   | -7694  | 77606906 | 77607106 |
| 11 | 77614800 | 77679491 + | NM_001291215 | Myo18a   | -7694  | 77606906 | 77607106 |
| 11 | 77908175 | 77970842 + | NM_145430    | Fam222b  | 3370   | 77911545 | 77911745 |
| 11 | 77908175 | 77970842 + | NM_145430    | Fam222b  | 34909  | 77943084 | 77943284 |
| 11 | 77971925 | 77979053 - | NM_009423    | Traf4    | -3061  | 77982114 | 77982314 |
| 11 | 77979608 | 77990169 - | NM_080849    | Nek8     | 7855   | 77982114 | 77982314 |
| 11 | 77979608 | 77990169 - | NM_080849    | Nek8     | -102   | 77990271 | 77990471 |
| 11 | 77991651 | 77994322 + | NM_001291235 | Tlcd1    | -9337  | 77982114 | 77982314 |

|    |          |            |              |               |       |          |          |
|----|----------|------------|--------------|---------------|-------|----------|----------|
| 11 | 77991651 | 77994322 + | NM_001291235 | Tlcd1         | -1180 | 77990271 | 77990471 |
| 11 | 77991651 | 77994322 + | NM_001291237 | Tlcd1         | -9337 | 77982114 | 77982314 |
| 11 | 77991651 | 77994322 + | NM_001291237 | Tlcd1         | -1180 | 77990271 | 77990471 |
| 11 | 77992160 | 77994322 + | NM_001291236 | Tlcd1         | -9846 | 77982114 | 77982314 |
| 11 | 77992160 | 77994322 + | NM_001291236 | Tlcd1         | -1689 | 77990271 | 77990471 |
| 11 | 77992160 | 77994322 + | NM_026708    | Tlcd1         | -9846 | 77982114 | 77982314 |
| 11 | 77992160 | 77994322 + | NM_026708    | Tlcd1         | -1689 | 77990271 | 77990471 |
| 11 | 77992329 | 77992390 + | NR_106113    | Mir7653       | -1858 | 77990271 | 77990471 |
| 11 | 78075256 | 78104128 + | NM_001002004 | 2610507B11Rik | -1091 | 78073965 | 78074165 |
| 11 | 78075256 | 78104128 + | NM_001002004 | 2610507B11Rik | 27715 | 78102971 | 78103171 |
| 11 | 78104343 | 78110308 + | NM_001287206 | BC030499      | -1172 | 78102971 | 78103171 |
| 11 | 78207987 | 78219160 + | NR_003282    | Slc13a2os     | 7028  | 78215015 | 78215215 |
| 11 | 78207987 | 78219160 + | NR_003282    | Slc13a2os     | 7740  | 78215727 | 78215927 |
| 11 | 78207987 | 78219160 + | NR_003282    | Slc13a2os     | 5988  | 78213975 | 78214175 |
| 11 | 78210778 | 78235688 - | NM_022411    | Slc13a2       | 15667 | 78219821 | 78220021 |
| 11 | 78210778 | 78235688 - | NM_022411    | Slc13a2       | -5484 | 78241172 | 78241372 |
| 11 | 78210778 | 78235688 - | NM_022411    | Slc13a2       | -8168 | 78243856 | 78244056 |
| 11 | 78210778 | 78235688 - | NM_022411    | Slc13a2       | 1427  | 78234061 | 78234261 |
| 11 | 78210778 | 78235688 - | NM_022411    | Slc13a2       | 20473 | 78215015 | 78215215 |
| 11 | 78210778 | 78235688 - | NM_022411    | Slc13a2       | 19761 | 78215727 | 78215927 |
| 11 | 78210778 | 78235688 - | NM_022411    | Slc13a2       | 21513 | 78213975 | 78214175 |
| 11 | 78279203 | 78285448 + | NM_026740    | Slc46a1       | -3421 | 78275582 | 78275782 |
| 11 | 78279203 | 78285448 + | NM_026740    | Slc46a1       | -1847 | 78277156 | 78277356 |
| 11 | 78336352 | 78349763 - | NM_001159392 | Tnfaip1       | -52   | 78349815 | 78350015 |
| 11 | 78336352 | 78349763 - | NM_001159392 | Tnfaip1       | -594  | 78350357 | 78350557 |
| 11 | 78336352 | 78349763 - | NM_009395    | Tnfaip1       | -52   | 78349815 | 78350015 |
| 11 | 78336352 | 78349763 - | NM_009395    | Tnfaip1       | -594  | 78350357 | 78350557 |
| 11 | 78349938 | 78354976 + | NM_018854    | Ift20         | 0     | 78349815 | 78350015 |
| 11 | 78349938 | 78354976 + | NM_018854    | Ift20         | 419   | 78350357 | 78350557 |
| 11 | 78355319 | 78364238 - | NM_133706    | Tmem97        | 2203  | 78361835 | 78362035 |



|    |          |            |              |               |        |          |          |
|----|----------|------------|--------------|---------------|--------|----------|----------|
| 11 | 78355319 | 78364238 - | NM_133706    | Tmem97        | -5008  | 78369246 | 78369446 |
| 11 | 78380670 | 78510928 - | NM_008702    | Nlk           | 10855  | 78499873 | 78500073 |
| 11 | 78380670 | 78510928 - | NM_008702    | Nlk           | -509   | 78511437 | 78511637 |
| 11 | 78776481 | 78798427 - | NM_001159301 | Lgals9        | 2336   | 78795891 | 78796091 |
| 11 | 78776481 | 78798427 - | NM_010708    | Lgals9        | 2336   | 78795891 | 78796091 |
| 11 | 78828303 | 78959857 - | NM_013571    | Ksr1          | 33627  | 78926030 | 78926230 |
| 11 | 78828303 | 78959857 - | NM_013571    | Ksr1          | 71454  | 78888203 | 78888403 |
| 11 | 78828303 | 78959857 - | NM_013571    | Ksr1          | 115443 | 78844214 | 78844414 |
| 11 | 78837099 | 78848508 + | NR_045873    | Gm11201       | 7115   | 78844214 | 78844414 |
| 11 | 79052884 | 79068198 - | NM_019653    | Wsb1          | -3047  | 79071245 | 79071445 |
| 11 | 79153394 | 79395112 + | NM_010897    | Nf1           | 36406  | 79189800 | 79190000 |
| 11 | 79404714 | 79507515 + | NM_175543    | Rab11fip4     | 63384  | 79468098 | 79468298 |
| 11 | 79747458 | 79775890 - | NM_144826    | Utp6          | 52     | 79775638 | 79775838 |
| 11 | 79859995 | 79894494 - | NM_001277106 | Crlf3         | -233   | 79894727 | 79894927 |
| 11 | 79859995 | 79894494 - | NM_001277106 | Crlf3         | 11026  | 79883268 | 79883468 |
| 11 | 79859995 | 79894494 - | NM_018776    | Crlf3         | -233   | 79894727 | 79894927 |
| 11 | 79859995 | 79894494 - | NM_018776    | Crlf3         | 11026  | 79883268 | 79883468 |
| 11 | 79902902 | 79949294 + | NM_001029856 | Atad5         | 20862  | 79923764 | 79923964 |
| 11 | 79902902 | 79949294 + | NM_001029856 | Atad5         | -7975  | 79894727 | 79894927 |
| 11 | 79950180 | 79955656 - | NM_183275    | Tefm          | -105   | 79955761 | 79955961 |
| 11 | 79967664 | 79992330 + | NM_172133    | Adap2         | 5011   | 79972675 | 79972875 |
| 11 | 80173994 | 80191518 - | NM_027472    | 5730455P16Rik | -4581  | 80196099 | 80196299 |
| 11 | 80196781 | 80209751 + | NM_001130169 | Zfp207        | -482   | 80196099 | 80196299 |
| 11 | 80196781 | 80209751 + | NM_001130170 | Zfp207        | -482   | 80196099 | 80196299 |
| 11 | 80196781 | 80209751 + | NM_001130171 | Zfp207        | -482   | 80196099 | 80196299 |
| 11 | 80196781 | 80209751 + | NM_011751    | Zfp207        | -482   | 80196099 | 80196299 |
| 11 | 80196781 | 80219376 + | NR_045038    | Zfp207        | -482   | 80196099 | 80196299 |
| 11 | 80295629 | 80593528 - | NM_177390    | Myo1d         | -9772  | 80603300 | 80603500 |
| 11 | 80295629 | 80593528 - | NM_177390    | Myo1d         | 4199   | 80589129 | 80589329 |
| 11 | 80295629 | 80593528 - | NM_177390    | Myo1d         | -4456  | 80597984 | 80598184 |

|    |          |            |              |               |        |          |          |
|----|----------|------------|--------------|---------------|--------|----------|----------|
| 11 | 80623917 | 80635536 + | NM_029537    | Tmem98        | 7811   | 80631728 | 80631928 |
| 11 | 80663883 | 80671803 - | NR_110449    | 4930507D10Rik | 3060   | 80668543 | 80668743 |
| 11 | 80671891 | 80681317 + | NM_029367    | Spaca3        | -8846  | 80662845 | 80663045 |
| 11 | 80671891 | 80681317 + | NM_029367    | Spaca3        | -3148  | 80668543 | 80668743 |
| 11 | 80693667 | 81781899 - | NM_001034013 | Asic2         | 549758 | 81231941 | 81232141 |
| 11 | 80693667 | 81781899 - | NM_001034013 | Asic2         | 354874 | 81426825 | 81427025 |
| 11 | 82878614 | 82884181 + | NM_011408    | Slfn2         | -41    | 82878373 | 82878573 |
| 11 | 83088614 | 83100229 - | NM_001166028 | Slfn14        | -5556  | 83105785 | 83105985 |
| 11 | 83105201 | 83108140 + | NR_028363    | AA465934      | 584    | 83105785 | 83105985 |
| 11 | 83106932 | 83108432 + | NR_028364    | AI450353      | -947   | 83105785 | 83105985 |
| 11 | 83107806 | 83107902 + | NR_028362    | Snord7        | -1821  | 83105785 | 83105985 |
| 11 | 83255378 | 83276464 - | NM_080453    | Mmp28         | 10087  | 83266177 | 83266377 |
| 11 | 83255378 | 83276464 - | NM_172797    | Mmp28         | 10087  | 83266177 | 83266377 |
| 11 | 83395563 | 83437196 + | NR_036452    | E230016K23Rik | 35371  | 83430934 | 83431134 |
| 11 | 83395563 | 83437196 + | NR_036453    | E230016K23Rik | 35371  | 83430934 | 83431134 |
| 11 | 83567139 | 83597257 + | NM_145432    | Heatr6        | 5852   | 83572991 | 83573191 |
| 11 | 83664371 | 83719420 + | NM_001291268 | Hnf1b         | 31839  | 83696210 | 83696410 |
| 11 | 83664371 | 83719420 + | NM_001291268 | Hnf1b         | -19    | 83664152 | 83664352 |
| 11 | 83664371 | 83719420 + | NM_009330    | Hnf1b         | 31839  | 83696210 | 83696410 |
| 11 | 83664371 | 83719420 + | NM_009330    | Hnf1b         | -19    | 83664152 | 83664352 |
| 11 | 83666462 | 83719420 + | NM_001291269 | Hnf1b         | 29748  | 83696210 | 83696410 |
| 11 | 83666462 | 83719420 + | NM_001291269 | Hnf1b         | -2110  | 83664152 | 83664352 |
| 11 | 83777933 | 83858079 + | NM_194341    | Synrg         | 52764  | 83830697 | 83830897 |
| 11 | 83961865 | 83980979 - | NM_001037932 | Gm11437       | 10797  | 83969982 | 83970182 |
| 11 | 83961865 | 83980979 - | NM_001037932 | Gm11437       | 3256   | 83977523 | 83977723 |
| 11 | 83961865 | 83980979 - | NM_001037932 | Gm11437       | 10349  | 83970430 | 83970630 |
| 11 | 84008940 | 84215154 + | NM_133360    | Acaca         | 59147  | 84068087 | 84068287 |
| 11 | 84008940 | 84215154 + | NM_133360    | Acaca         | 62580  | 84071520 | 84071720 |
| 11 | 84236358 | 84327004 - | NM_019816    | Aatf          | -350   | 84327354 | 84327554 |
| 11 | 84626563 | 84633018 - | NM_145433    | Mrm1          | -8153  | 84641171 | 84641371 |

|    |          |            |              |               |        |          |          |
|----|----------|------------|--------------|---------------|--------|----------|----------|
| 11 | 84626563 | 84633018 - | NM_145433    | Mrm1          | -4154  | 84637172 | 84637372 |
| 11 | 84634230 | 84642506 - | NM_177564    | Dhrs11        | 1135   | 84641171 | 84641371 |
| 11 | 84634230 | 84642506 - | NM_177564    | Dhrs11        | 5134   | 84637172 | 84637372 |
| 11 | 84642680 | 84644371 + | NR_046281    | 4930502E09Rik | -1309  | 84641171 | 84641371 |
| 11 | 84642680 | 84644371 + | NR_046281    | 4930502E09Rik | -5308  | 84637172 | 84637372 |
| 11 | 84645863 | 84684241 - | NM_153144    | Ggnbp2        | -244   | 84684485 | 84684685 |
| 11 | 84645863 | 84684241 - | NM_153144    | Ggnbp2        | 5212   | 84678829 | 84679029 |
| 11 | 84683507 | 84685134 + | NR_131201    | Ggnbp2os      | 978    | 84684485 | 84684685 |
| 11 | 84683507 | 84685134 + | NR_131201    | Ggnbp2os      | -4478  | 84678829 | 84679029 |
| 11 | 84684425 | 84685134 + | NR_131197    | Ggnbp2os      | 60     | 84684485 | 84684685 |
| 11 | 84684425 | 84685134 + | NR_131197    | Ggnbp2os      | -5396  | 84678829 | 84679029 |
| 11 | 84693722 | 84724634 + | NM_025414    | Myo19         | -9037  | 84684485 | 84684685 |
| 11 | 84771256 | 84779557 + | NM_007607    | Car4          | 7952   | 84779208 | 84779408 |
| 11 | 84797990 | 84953458 - | NM_001029934 | Usp32         | 34455  | 84918803 | 84919003 |
| 11 | 84797990 | 84953458 - | NM_001029934 | Usp32         | 8224   | 84945034 | 84945234 |
| 11 | 85004812 | 85048623 - | NM_025825    | Appbp2        | -5685  | 85054308 | 85054508 |
| 11 | 85166666 | 85639561 + | NM_001166642 | Bcas3         | 176866 | 85343532 | 85343732 |
| 11 | 85166666 | 85639561 + | NM_001166643 | Bcas3         | 176866 | 85343532 | 85343732 |
| 11 | 85166666 | 85639561 + | NM_138681    | Bcas3         | 176866 | 85343532 | 85343732 |
| 11 | 85871638 | 86014696 - | NM_178309    | Brip1         | 520    | 86013976 | 86014176 |
| 11 | 86014862 | 86024695 + | NR_130958    | Brip1os       | -686   | 86013976 | 86014176 |
| 11 | 86014862 | 86117946 + | NR_130959    | Brip1os       | 56125  | 86070987 | 86071187 |
| 11 | 86014862 | 86117946 + | NR_130959    | Brip1os       | -686   | 86013976 | 86014176 |
| 11 | 86024185 | 86071071 - | NM_027421    | Ints2         | 0      | 86070987 | 86071187 |
| 11 | 86079217 | 86171028 - | NM_001080931 | Med13         | 10770  | 86160058 | 86160258 |
| 11 | 86079217 | 86171028 - | NM_001080931 | Med13         | 9616   | 86161212 | 86161412 |
| 11 | 86079217 | 86171028 - | NM_001080931 | Med13         | 11243  | 86159585 | 86159785 |
| 11 | 86397367 | 86497325 - | NM_029478    | Vmp1          | 96398  | 86400727 | 86400927 |
| 11 | 86397367 | 86497325 - | NM_029478    | Vmp1          | 4438   | 86492687 | 86492887 |
| 11 | 86397367 | 86497325 - | NM_029478    | Vmp1          | 6484   | 86490641 | 86490841 |

|    |          |            |              |        |        |          |          |
|----|----------|------------|--------------|--------|--------|----------|----------|
| 11 | 86397569 | 86397661 - | NR_029738    | Mir21a | -3066  | 86400727 | 86400927 |
| 11 | 86397569 | 86397661 - | NR_029738    | Mir21a | 2645   | 86394816 | 86395016 |
| 11 | 86497485 | 86505826 + | NM_175004    | Ptrh2  | -4598  | 86492687 | 86492887 |
| 11 | 86497485 | 86505826 + | NM_175004    | Ptrh2  | -6644  | 86490641 | 86490841 |
| 11 | 86497583 | 86505960 + | NM_001098810 | Ptrh2  | -4696  | 86492687 | 86492887 |
| 11 | 86497583 | 86505960 + | NM_001098810 | Ptrh2  | -6742  | 86490641 | 86490841 |
| 11 | 86508155 | 86570995 - | NM_001003908 | Cltc   | 245    | 86570550 | 86570750 |
| 11 | 86508155 | 86570995 - | NM_001003908 | Cltc   | 14537  | 86556258 | 86556458 |
| 11 | 86582351 | 86621163 - | NM_026191    | Dhx40  | 9075   | 86611888 | 86612088 |
| 11 | 86749927 | 86807265 - | NM_001005341 | Ypel2  | 31479  | 86775586 | 86775786 |
| 11 | 86749927 | 86807265 - | NM_001005341 | Ypel2  | -8426  | 86815691 | 86815891 |
| 11 | 86749927 | 86807265 - | NM_001005341 | Ypel2  | -1813  | 86809078 | 86809278 |
| 11 | 86749927 | 86807265 - | NM_001005341 | Ypel2  | 25980  | 86781085 | 86781285 |
| 11 | 86847296 | 86887640 - | NM_025638    | Gdpd1  | 25101  | 86862339 | 86862539 |
| 11 | 86847296 | 86887640 - | NM_025638    | Gdpd1  | 24442  | 86862998 | 86863198 |
| 11 | 86847296 | 86887640 - | NM_025638    | Gdpd1  | 29989  | 86857451 | 86857651 |
| 11 | 87218567 | 87369326 + | NM_031386    | Tex14  | 31487  | 87250054 | 87250254 |
| 11 | 87218567 | 87369326 + | NM_031386    | Tex14  | 114272 | 87332839 | 87333039 |
| 11 | 87241093 | 87369326 + | NM_001199293 | Tex14  | 8961   | 87250054 | 87250254 |
| 11 | 87241093 | 87369326 + | NM_001199293 | Tex14  | 91746  | 87332839 | 87333039 |
| 11 | 87405719 | 87429799 + | NM_133215    | Mtmr4  | 2842   | 87408561 | 87408761 |
| 11 | 87405719 | 87429799 + | NM_133215    | Mtmr4  | 7230   | 87412949 | 87413149 |
| 11 | 87430666 | 87473045 + | NM_001045527 | Hsf5   | 35934  | 87466600 | 87466800 |
| 11 | 87476589 | 87549042 + | NM_172448    | Rnf43  | 46541  | 87523130 | 87523330 |
| 11 | 87476589 | 87549042 + | NM_172448    | Rnf43  | 24556  | 87501145 | 87501345 |
| 11 | 87476589 | 87549042 + | NM_172448    | Rnf43  | 34088  | 87510677 | 87510877 |
| 11 | 87476589 | 87549042 + | NM_172448    | Rnf43  | 39811  | 87516400 | 87516600 |
| 11 | 87476589 | 87549042 + | NM_172448    | Rnf43  | 27003  | 87503592 | 87503792 |
| 11 | 87476589 | 87549042 + | NM_172448    | Rnf43  | -9789  | 87466600 | 87466800 |
| 11 | 87476589 | 87549042 + | NM_172448    | Rnf43  | 20055  | 87496644 | 87496844 |

|    |          |            |              |               |        |          |          |
|----|----------|------------|--------------|---------------|--------|----------|----------|
| 11 | 87513026 | 87518830 + | NR_045139    | 1110028F11Rik | -2149  | 87510677 | 87510877 |
| 11 | 87513026 | 87518830 + | NR_045139    | 1110028F11Rik | 3374   | 87516400 | 87516600 |
| 11 | 87513026 | 87518830 + | NR_045139    | 1110028F11Rik | -9234  | 87503592 | 87503792 |
| 11 | 87570343 | 87570458 - | NR_106176    | Mir142b       | -2834  | 87573292 | 87573492 |
| 11 | 87570366 | 87570430 + | NR_029555    | Mir142        | 2926   | 87573292 | 87573492 |
| 11 | 87574043 | 87599431 + | NM_172449    | Bzrap1        | 17140  | 87591183 | 87591383 |
| 11 | 87574043 | 87599431 + | NM_172449    | Bzrap1        | -551   | 87573292 | 87573492 |
| 11 | 87677500 | 87689039 - | NM_007946    | Epx           | -1121  | 87690160 | 87690360 |
| 11 | 87702461 | 87703397 - | NM_146411    | Olfr462       | -9585  | 87712982 | 87713182 |
| 11 | 87706489 | 87707425 - | NM_146413    | Olfr463       | -5557  | 87712982 | 87713182 |
| 11 | 87793027 | 87811801 - | NM_001168471 | Dynll2        | -4570  | 87816371 | 87816571 |
| 11 | 87912648 | 88007643 + | NM_198013    | Cuedc1        | 38735  | 87951383 | 87951583 |
| 11 | 87912648 | 88007643 + | NM_198013    | Cuedc1        | 39131  | 87951779 | 87951979 |
| 11 | 88152884 | 88579544 - | NM_054043    | Msi2          | 301703 | 88277641 | 88277841 |
| 11 | 88152884 | 88579544 - | NM_054043    | Msi2          | 54073  | 88525271 | 88525471 |
| 11 | 88152884 | 88579544 - | NM_054043    | Msi2          | 103693 | 88475651 | 88475851 |
| 11 | 88152884 | 88579544 - | NM_054043    | Msi2          | 212166 | 88367178 | 88367378 |
| 11 | 88480565 | 88484741 + | NR_131025    | 0610039H22Rik | -4714  | 88475651 | 88475851 |
| 11 | 88692106 | 88725901 - | NM_001042541 | Akap1         | 23258  | 88702443 | 88702643 |
| 11 | 88692106 | 88712818 - | NM_009648    | Akap1         | 10175  | 88702443 | 88702643 |
| 11 | 88692106 | 88712827 - | NR_104310    | Akap1         | 10184  | 88702443 | 88702643 |
| 11 | 89891662 | 89897820 + | NM_026433    | Tmem100       | -253   | 89891209 | 89891409 |
| 11 | 90110790 | 90139888 + | NM_026178    | Mmd           | 19869  | 90130659 | 90130859 |
| 11 | 90110790 | 90139888 + | NM_026178    | Mmd           | 2541   | 90113331 | 90113531 |
| 11 | 90197849 | 90252232 - | NM_172563    | Hlf           | 26817  | 90225215 | 90225415 |
| 11 | 90197849 | 90252232 - | NM_172563    | Hlf           | 32233  | 90219799 | 90219999 |
| 11 | 90337807 | 90499423 - | NM_011505    | Stxbp4        | 79117  | 90420106 | 90420306 |
| 11 | 90337807 | 90499423 - | NM_011505    | Stxbp4        | 70896  | 90428327 | 90428527 |
| 11 | 90507005 | 90548916 - | NM_028011    | Tom11         | 30160  | 90518556 | 90518756 |
| 11 | 90507005 | 90548916 - | NM_028011    | Tom11         | 21040  | 90527676 | 90527876 |

|    |          |            |              |         |       |          |          |
|----|----------|------------|--------------|---------|-------|----------|----------|
| 11 | 90507005 | 90548916 - | NM_028011    | Tom11   | 1421  | 90547295 | 90547495 |
| 11 | 90507005 | 90548916 - | NM_028011    | Tom11   | 24190 | 90524526 | 90524726 |
| 11 | 93811128 | 93817098 - | NM_001077529 | Nme2    | 720   | 93816178 | 93816378 |
| 11 | 93811128 | 93817571 - | NM_008705    | Nme2    | 1193  | 93816178 | 93816378 |
| 11 | 93857405 | 93987397 + | NM_001199203 | Spag9   | 39921 | 93897326 | 93897526 |
| 11 | 93857405 | 93987397 + | NM_001199203 | Spag9   | 25546 | 93882951 | 93883151 |
| 11 | 93857405 | 93987397 + | NM_001199204 | Spag9   | 39921 | 93897326 | 93897526 |
| 11 | 93857405 | 93987397 + | NM_001199204 | Spag9   | 25546 | 93882951 | 93883151 |
| 11 | 93857405 | 93987397 + | NM_027569    | Spag9   | 39921 | 93897326 | 93897526 |
| 11 | 93857405 | 93987397 + | NM_027569    | Spag9   | 25546 | 93882951 | 93883151 |
| 11 | 93905519 | 93987397 + | NM_001025428 | Spag9   | -7993 | 93897326 | 93897526 |
| 11 | 93905519 | 93987397 + | NM_001025429 | Spag9   | -7993 | 93897326 | 93897526 |
| 11 | 93905519 | 93987397 + | NM_001025430 | Spag9   | -7993 | 93897326 | 93897526 |
| 11 | 93905519 | 93987397 + | NM_001199205 | Spag9   | -7993 | 93897326 | 93897526 |
| 11 | 94072768 | 94076807 + | NM_009427    | Tob1    | -9061 | 94063507 | 94063707 |
| 11 | 94072768 | 94076807 + | NM_009427    | Tob1    | -2701 | 94069867 | 94070067 |
| 11 | 94072768 | 94076807 + | NM_009427    | Tob1    | -9684 | 94062884 | 94063084 |
| 11 | 94152453 | 94183226 - | NM_026313    | Luc7l3  | 8518  | 94174508 | 94174708 |
| 11 | 94189315 | 94203162 + | NM_027799    | Ankrd40 | 6508  | 94195823 | 94196023 |
| 11 | 94189315 | 94200824 + | NM_146024    | Ankrd40 | 6508  | 94195823 | 94196023 |
| 11 | 94204609 | 94254291 - | NM_029600    | Abcc3   | 33472 | 94220619 | 94220819 |
| 11 | 94204609 | 94254291 - | NM_029600    | Abcc3   | 21877 | 94232214 | 94232414 |
| 11 | 94204609 | 94254291 - | NM_029600    | Abcc3   | 27335 | 94226756 | 94226956 |
| 11 | 94204609 | 94254291 - | NM_029600    | Abcc3   | 46194 | 94207897 | 94208097 |
| 11 | 94350913 | 94361289 - | NM_027984    | Epn3    | -9059 | 94370348 | 94370548 |
| 11 | 94362661 | 94382817 - | NM_170671    | Mycbpap | 12269 | 94370348 | 94370548 |
| 11 | 94418416 | 94463101 - | NM_153807    | Acsf2   | 36300 | 94426601 | 94426801 |
| 11 | 94418416 | 94463101 - | NM_153807    | Acsf2   | 11792 | 94451109 | 94451309 |
| 11 | 94426388 | 94430442 + | NM_007689    | Chad    | 213   | 94426601 | 94426801 |
| 11 | 94491138 | 94506531 + | NM_133807    | Lrrc59  | -401  | 94490537 | 94490737 |

|    |          |            |              |               |       |          |          |
|----|----------|------------|--------------|---------------|-------|----------|----------|
| 11 | 94491138 | 94506531 + | NM_133807    | Lrrc59        | 3259  | 94494397 | 94494597 |
| 11 | 94616450 | 94622497 - | NM_001105561 | Gm11545       | 894   | 94621403 | 94621603 |
| 11 | 94828907 | 94829771 + | NM_018792    | Hils1         | -8641 | 94820066 | 94820266 |
| 11 | 94852526 | 94868213 + | NM_172261    | Ppp1r9b       | 6476  | 94859002 | 94859202 |
| 11 | 94852526 | 94868213 + | NM_172261    | Ppp1r9b       | 9957  | 94862483 | 94862683 |
| 11 | 94871193 | 94887402 + | NM_146025    | Samd14        | -8510 | 94862483 | 94862683 |
| 11 | 94905789 | 94930513 - | NM_001306071 | Itga3         | -4080 | 94934593 | 94934793 |
| 11 | 94905789 | 94930513 - | NM_001306071 | Itga3         | -8543 | 94939056 | 94939256 |
| 11 | 94905789 | 94938126 - | NM_001306162 | Itga3         | 3333  | 94934593 | 94934793 |
| 11 | 94905789 | 94938126 - | NM_001306162 | Itga3         | -930  | 94939056 | 94939256 |
| 11 | 94905789 | 94938029 - | NM_013565    | Itga3         | 3236  | 94934593 | 94934793 |
| 11 | 94905789 | 94938029 - | NM_013565    | Itga3         | -1027 | 94939056 | 94939256 |
| 11 | 95133167 | 95171561 - | NM_001195003 | Kat7          | 12421 | 95158940 | 95159140 |
| 11 | 95133167 | 95171561 - | NM_001195004 | Kat7          | 12421 | 95158940 | 95159140 |
| 11 | 95133167 | 95171561 - | NM_177619    | Kat7          | 12421 | 95158940 | 95159140 |
| 11 | 95246236 | 95252967 + | NM_016752    | Slc35b1       | 2541  | 95248777 | 95248977 |
| 11 | 95685814 | 95693455 + | NM_153104    | Phospho1      | 2615  | 95688429 | 95688629 |
| 11 | 95720131 | 95722361 + | NR_045187    | 4833417C18Rik | -4924 | 95715007 | 95715207 |
| 11 | 95724873 | 95776186 - | NM_008081    | B4galnt2      | 5022  | 95770964 | 95771164 |
| 11 | 95724873 | 95776186 - | NM_008081    | B4galnt2      | -8285 | 95784471 | 95784671 |
| 11 | 95885859 | 95892143 + | NM_008119    | Gip           | -55   | 95885604 | 95885804 |
| 11 | 95908750 | 95926679 - | NM_172300    | Ube2z         | -9993 | 95936672 | 95936872 |
| 11 | 95934107 | 95936946 - | NM_001161419 | Atp5g1        | 74    | 95936672 | 95936872 |
| 11 | 95934107 | 95937009 - | NM_007506    | Atp5g1        | 137   | 95936672 | 95936872 |
| 11 | 96152351 | 96168225 - | NR_131758    | Hoxb5os       | 0     | 96168113 | 96168313 |
| 11 | 96678728 | 96690817 - | NM_001130450 | Nfe2l1        | -1436 | 96692253 | 96692453 |
| 11 | 96678728 | 96685442 - | NM_001130451 | Nfe2l1        | -6811 | 96692253 | 96692453 |
| 11 | 96678728 | 96685442 - | NM_001130452 | Nfe2l1        | -6811 | 96692253 | 96692453 |
| 11 | 96678728 | 96685328 - | NM_001130453 | Nfe2l1        | -6925 | 96692253 | 96692453 |
| 11 | 96678728 | 96685328 - | NM_001130454 | Nfe2l1        | -6925 | 96692253 | 96692453 |

|    |          |            |              |               |       |          |          |
|----|----------|------------|--------------|---------------|-------|----------|----------|
| 11 | 96678728 | 96691283 - | NM_008686    | Nfe2l1        | -970  | 96692253 | 96692453 |
| 11 | 96768739 | 96777829 - | NM_001308183 | Cdk5rap3      | -1029 | 96778858 | 96779058 |
| 11 | 96768739 | 96777829 - | NM_001308183 | Cdk5rap3      | -3125 | 96780954 | 96781154 |
| 11 | 96768739 | 96777829 - | NM_030248    | Cdk5rap3      | -1029 | 96778858 | 96779058 |
| 11 | 96768739 | 96777829 - | NM_030248    | Cdk5rap3      | -3125 | 96780954 | 96781154 |
| 11 | 96790638 | 96796962 + | NM_146026    | Prr15l        | -9484 | 96780954 | 96781154 |
| 11 | 96799130 | 96805334 - | NM_134021    | Pnpo          | 1068  | 96804066 | 96804266 |
| 11 | 96805460 | 96826375 + | NR_003293    | D030028A08Rik | -1194 | 96804066 | 96804266 |
| 11 | 96891266 | 96895275 + | NM_146027    | Scrn2         | -54   | 96891012 | 96891212 |
| 11 | 97067171 | 97141891 - | NM_008942    | Npepps        | 33456 | 97108235 | 97108435 |
| 11 | 97370654 | 97436441 - | NM_018873    | Srcin1        | 42862 | 97393379 | 97393579 |
| 11 | 97459825 | 97484208 + | NR_045496    | 2410003L11Rik | 6012  | 97465837 | 97466037 |
| 11 | 97660986 | 97700079 + | NM_010688    | Lasp1         | 27181 | 97688167 | 97688367 |
| 11 | 97660986 | 97700079 + | NM_010688    | Lasp1         | 8125  | 97669111 | 97669311 |
| 11 | 97660986 | 97700079 + | NM_010688    | Lasp1         | 11860 | 97672846 | 97673046 |
| 11 | 97660986 | 97700079 + | NM_010688    | Lasp1         | 21280 | 97682266 | 97682466 |
| 11 | 97660986 | 97700079 + | NM_010688    | Lasp1         | 10761 | 97671747 | 97671947 |
| 11 | 97715621 | 97745469 - | NM_001081435 | Fbxo47        | 25980 | 97719289 | 97719489 |
| 11 | 97784551 | 97847761 - | NM_001163608 | Plxdc1        | -8198 | 97855959 | 97856159 |
| 11 | 97784551 | 97847761 - | NM_028199    | Plxdc1        | -8198 | 97855959 | 97856159 |
| 11 | 97850894 | 97857488 - | NM_207231    | Arl5c         | 1329  | 97855959 | 97856159 |
| 11 | 97862822 | 97883942 - | NM_001282977 | Cacnb1        | -3712 | 97887654 | 97887854 |
| 11 | 97862822 | 97883942 - | NM_145121    | Cacnb1        | -3712 | 97887654 | 97887854 |
| 11 | 97866239 | 97883942 - | NM_001159319 | Cacnb1        | -3712 | 97887654 | 97887854 |
| 11 | 97866239 | 97879687 - | NM_001159320 | Cacnb1        | -7967 | 97887654 | 97887854 |
| 11 | 97866239 | 97883942 - | NM_001282978 | Cacnb1        | -3712 | 97887654 | 97887854 |
| 11 | 97866239 | 97883942 - | NM_031173    | Cacnb1        | -3712 | 97887654 | 97887854 |
| 11 | 97888024 | 97891808 + | NM_001159483 | Rpl19         | -170  | 97887654 | 97887854 |
| 11 | 97888238 | 97891808 + | NM_009078    | Rpl19         | -384  | 97887654 | 97887854 |
| 11 | 98123920 | 98123977 + | NR_039579    | Mir5119       | 2456  | 98126376 | 98126576 |



|    |          |            |              |               |       |          |          |
|----|----------|------------|--------------|---------------|-------|----------|----------|
| 11 | 98210052 | 98219110 + | NM_144828    | Ppp1r1b       | 7159  | 98217211 | 98217411 |
| 11 | 98210052 | 98219110 + | NM_144828    | Ppp1r1b       | 7774  | 98217826 | 98218026 |
| 11 | 98212032 | 98219598 - | NR_045477    | 1700003D09Rik | 2187  | 98217211 | 98217411 |
| 11 | 98212032 | 98219598 - | NR_045477    | 1700003D09Rik | 253   | 98219145 | 98219345 |
| 11 | 98212032 | 98219598 - | NR_045477    | 1700003D09Rik | 1572  | 98217826 | 98218026 |
| 11 | 98219682 | 98242427 + | NM_021547    | Stard3        | -2271 | 98217211 | 98217411 |
| 11 | 98219682 | 98242427 + | NM_021547    | Stard3        | -337  | 98219145 | 98219345 |
| 11 | 98219682 | 98242427 + | NM_021547    | Stard3        | -1656 | 98217826 | 98218026 |
| 11 | 98326007 | 98407346 - | NM_011771    | Ikzf3         | 75595 | 98331551 | 98331751 |
| 11 | 98442608 | 98448560 - | NM_025661    | Ormdl3        | -2147 | 98450707 | 98450907 |
| 11 | 98459605 | 98460901 + | NM_001195544 | Gm12          | -8698 | 98450707 | 98450907 |
| 11 | 98543868 | 98557293 + | NM_009439    | Psmc3         | -2931 | 98540737 | 98540937 |
| 11 | 98603187 | 98626426 + | NM_178060    | Thra          | 9686  | 98612873 | 98613073 |
| 11 | 98603187 | 98626426 + | NM_178060    | Thra          | 8579  | 98611766 | 98611966 |
| 11 | 98629246 | 98636692 - | NM_145434    | Nr1d1         | -7839 | 98644531 | 98644731 |
| 11 | 98629246 | 98636692 - | NM_145434    | Nr1d1         | 605   | 98635887 | 98636087 |
| 11 | 98724912 | 98766893 + | NM_197940    | Wipf2         | 41104 | 98766016 | 98766216 |
| 11 | 98724912 | 98766893 + | NM_197940    | Wipf2         | 41534 | 98766446 | 98766646 |
| 11 | 98724912 | 98766893 + | NM_197940    | Wipf2         | 11563 | 98736475 | 98736675 |
| 11 | 98769203 | 98785257 + | NM_001025779 | Cdc6          | -2987 | 98766016 | 98766216 |
| 11 | 98769203 | 98785257 + | NM_001025779 | Cdc6          | -1942 | 98767061 | 98767261 |
| 11 | 98769203 | 98785257 + | NM_001025779 | Cdc6          | -2557 | 98766446 | 98766646 |
| 11 | 98769465 | 98785257 + | NM_011799    | Cdc6          | -3249 | 98766016 | 98766216 |
| 11 | 98769465 | 98785257 + | NM_011799    | Cdc6          | -2204 | 98767061 | 98767261 |
| 11 | 98769465 | 98785257 + | NM_011799    | Cdc6          | -2819 | 98766446 | 98766646 |
| 11 | 98799010 | 98836257 + | NM_009024    | Rara          | 24157 | 98823167 | 98823367 |
| 11 | 98799010 | 98836257 + | NM_009024    | Rara          | -1597 | 98797213 | 98797413 |
| 11 | 98799010 | 98836257 + | NM_009024    | Rara          | 21766 | 98820776 | 98820976 |
| 11 | 98799032 | 98836257 + | NM_001177302 | Rara          | 24135 | 98823167 | 98823367 |
| 11 | 98799032 | 98836257 + | NM_001177302 | Rara          | -1619 | 98797213 | 98797413 |

|    |           |             |              |          |       |           |           |
|----|-----------|-------------|--------------|----------|-------|-----------|-----------|
| 11 | 98799032  | 98836257 +  | NM_001177302 | Rara     | 21744 | 98820776  | 98820976  |
| 11 | 98801025  | 98836257 +  | NM_001177303 | Rara     | 22142 | 98823167  | 98823367  |
| 11 | 98801025  | 98836257 +  | NM_001177303 | Rara     | -3612 | 98797213  | 98797413  |
| 11 | 98801025  | 98836257 +  | NM_001177303 | Rara     | 19751 | 98820776  | 98820976  |
| 11 | 98821785  | 98836257 +  | NM_001176528 | Rara     | 1382  | 98823167  | 98823367  |
| 11 | 98821785  | 98836257 +  | NM_001176528 | Rara     | -809  | 98820776  | 98820976  |
| 11 | 98926992  | 98950621 -  | NM_172564    | Tns4     | -5967 | 98956588  | 98956788  |
| 11 | 99094412  | 99105382 -  | NM_172946    | Krt222   | -6629 | 99112011  | 99112211  |
| 11 | 99226321  | 99236218 -  | NM_027574    | Krt28    | -3585 | 99239803  | 99240003  |
| 11 | 99289717  | 99299468 -  | NM_023256    | Krt20    | -3485 | 99302953  | 99303153  |
| 11 | 99289717  | 99299468 -  | NM_023256    | Krt20    | 1024  | 99298244  | 99298444  |
| 11 | 99443863  | 99444992 -  | NM_001039502 | Krtap1-4 | -9036 | 99454028  | 99454228  |
| 11 | 99451776  | 99452692 -  | NM_001085526 | Krtap1-3 | -1336 | 99454028  | 99454228  |
| 11 | 99898665  | 99902869 -  | NM_027563    | Krt34    | -5710 | 99908579  | 99908779  |
| 11 | 99907960  | 99911866 -  | NM_010659    | Krt31    | 3087  | 99908579  | 99908779  |
| 11 | 99993073  | 99997264 -  | NM_008469    | Krt15    | -726  | 99997990  | 99998190  |
| 11 | 100002126 | 100007234 - | NM_008471    | Krt19    | -1831 | 100009065 | 100009265 |
| 11 | 100002126 | 100007234 - | NM_008471    | Krt19    | -6092 | 100013326 | 100013526 |
| 11 | 100002126 | 100007234 - | NM_008471    | Krt19    | -7781 | 100015015 | 100015215 |
| 11 | 100002126 | 100007234 - | NM_008471    | Krt19    | -5292 | 100012526 | 100012726 |
| 11 | 100230170 | 100259105 - | NM_010593    | Jup      | 2050  | 100256855 | 100257055 |
| 11 | 100283635 | 100302404 - | NM_026561    | Nt5c3b   | 14924 | 100287280 | 100287480 |
| 11 | 100337666 | 100389315 - | NM_001199296 | Acly     | 37073 | 100352042 | 100352242 |
| 11 | 100337666 | 100389315 - | NM_134037    | Acly     | 37073 | 100352042 | 100352242 |
| 11 | 100576317 | 100599530 - | NM_001305003 | Rab5c    | 2521  | 100596809 | 100597009 |
| 11 | 100576317 | 100599530 - | NM_001305003 | Rab5c    | 843   | 100598487 | 100598687 |
| 11 | 100576317 | 100599530 - | NM_024456    | Rab5c    | 2521  | 100596809 | 100597009 |
| 11 | 100576317 | 100599530 - | NM_024456    | Rab5c    | 843   | 100598487 | 100598687 |
| 11 | 100720665 | 100746484 + | NM_011488    | Stat5a   | 6451  | 100727116 | 100727316 |
| 11 | 100721798 | 100746484 + | NM_001164062 | Stat5a   | 5318  | 100727116 | 100727316 |

|    |           |             |              |          |       |           |           |
|----|-----------|-------------|--------------|----------|-------|-----------|-----------|
| 11 | 100748124 | 100800826 - | NM_011486    | Stat3    | 1959  | 100798667 | 100798867 |
| 11 | 100748124 | 100800826 - | NM_011486    | Stat3    | 14691 | 100785935 | 100786135 |
| 11 | 100748124 | 100800826 - | NM_213659    | Stat3    | 1959  | 100798667 | 100798867 |
| 11 | 100748124 | 100800826 - | NM_213659    | Stat3    | 14691 | 100785935 | 100786135 |
| 11 | 100748124 | 100800826 - | NM_213660    | Stat3    | 1959  | 100798667 | 100798867 |
| 11 | 100748124 | 100800826 - | NM_213660    | Stat3    | 14691 | 100785935 | 100786135 |
| 11 | 100870766 | 100925032 + | NM_001243049 | Atp6v0a1 | 2156  | 100872922 | 100873122 |
| 11 | 100870766 | 100925032 + | NM_001243049 | Atp6v0a1 | 976   | 100871742 | 100871942 |
| 11 | 100870766 | 100925032 + | NM_001243050 | Atp6v0a1 | 2156  | 100872922 | 100873122 |
| 11 | 100870766 | 100925032 + | NM_001243050 | Atp6v0a1 | 976   | 100871742 | 100871942 |
| 11 | 100870766 | 100925032 + | NM_001243051 | Atp6v0a1 | 2156  | 100872922 | 100873122 |
| 11 | 100870766 | 100925032 + | NM_001243051 | Atp6v0a1 | 976   | 100871742 | 100871942 |
| 11 | 100870766 | 100925032 + | NM_016920    | Atp6v0a1 | 2156  | 100872922 | 100873122 |
| 11 | 100870766 | 100925032 + | NM_016920    | Atp6v0a1 | 976   | 100871742 | 100871942 |
| 11 | 100931408 | 100938986 + | NM_013792    | Naglu    | -6058 | 100925150 | 100925350 |
| 11 | 100957636 | 100981158 - | NM_028933    | Fam134c  | 1471  | 100979487 | 100979687 |
| 11 | 100957830 | 100981139 - | NM_026501    | Fam134c  | 1452  | 100979487 | 100979687 |
| 11 | 100981445 | 100987734 + | NM_134024    | Tubg1    | -1758 | 100979487 | 100979687 |
| 11 | 101121881 | 101138724 + | NM_175638    | Wnk4     | 9216  | 101131097 | 101131297 |
| 11 | 101139284 | 101140263 - | NM_026618    | Coa3     | 1147  | 101138916 | 101139116 |
| 11 | 101140517 | 101150016 + | NM_026562    | Cntd1    | -1401 | 101138916 | 101139116 |
| 11 | 101140517 | 101150016 + | NM_026562    | Cntd1    | -9220 | 101131097 | 101131297 |
| 11 | 101149581 | 101163582 - | NM_019584    | Becn1    | -5716 | 101169298 | 101169498 |
| 11 | 101149581 | 101163582 - | NM_019584    | Becn1    | -1762 | 101165344 | 101165544 |
| 11 | 101177565 | 101184845 + | NM_011192    | Psme3    | -8067 | 101169298 | 101169498 |
| 11 | 101229044 | 101239218 + | NM_008061    | G6pc     | 0     | 101228886 | 101229086 |
| 11 | 101229044 | 101239218 + | NM_008061    | G6pc     | -2905 | 101225939 | 101226139 |
| 11 | 101229044 | 101239218 + | NM_008061    | G6pc     | -4613 | 101224231 | 101224431 |
| 11 | 101309726 | 101320016 + | NM_027320    | Ifi35    | 8071  | 101317797 | 101317997 |
| 11 | 101309726 | 101320016 + | NM_027320    | Ifi35    | 4110  | 101313836 | 101314036 |

|    |           |             |              |          |       |           |           |
|----|-----------|-------------|--------------|----------|-------|-----------|-----------|
| 11 | 101320062 | 101327514 - | NM_012037    | Vat1     | 2771  | 101324543 | 101324743 |
| 11 | 101329652 | 101332621 + | NM_009708    | Rnd2     | -4909 | 101324543 | 101324743 |
| 11 | 101350078 | 101413270 - | NM_009764    | Brca1    | 32278 | 101380792 | 101380992 |
| 11 | 101350078 | 101413270 - | NM_009764    | Brca1    | 43205 | 101369865 | 101370065 |
| 11 | 101443556 | 101453100 + | NM_144830    | Tmem106a | 7739  | 101451295 | 101451495 |
| 11 | 101443556 | 101453100 + | NM_144830    | Tmem106a | 7354  | 101450910 | 101451110 |
| 11 | 101526855 | 101529147 + | NM_025404    | Arl4d    | -2680 | 101523975 | 101524175 |
| 11 | 101526855 | 101529147 + | NM_025404    | Arl4d    | -7111 | 101519544 | 101519744 |
| 11 | 102006827 | 102010843 + | NM_145829    | Nags     | 701   | 102007528 | 102007728 |
| 11 | 102110196 | 102126498 + | NM_153544    | BC030867 | -7314 | 102102682 | 102102882 |
| 11 | 102146134 | 102150742 + | NM_001302506 | Tmub2    | 151   | 102146285 | 102146485 |
| 11 | 102146253 | 102150742 + | NM_001302505 | Tmub2    | 32    | 102146285 | 102146485 |
| 11 | 102146253 | 102150742 + | NM_028076    | Tmub2    | 32    | 102146285 | 102146485 |
| 11 | 102264295 | 102268832 - | NM_026542    | Slc25a39 | 684   | 102267948 | 102268148 |
| 11 | 102266234 | 102266302 - | NR_105895    | Mir6930  | -1646 | 102267948 | 102268148 |
| 11 | 102337230 | 102417473 - | NM_001159492 | Gpatch8  | -2672 | 102420145 | 102420345 |
| 11 | 102337230 | 102417473 - | NM_001159492 | Gpatch8  | -8395 | 102425868 | 102426068 |
| 11 | 102337230 | 102417473 - | NM_001159492 | Gpatch8  | 46480 | 102370793 | 102370993 |
| 11 | 102337230 | 102417473 - | NM_001159492 | Gpatch8  | 40683 | 102376590 | 102376790 |
| 11 | 102546002 | 102559040 - | NM_025918    | Ccdc43   | -954  | 102559994 | 102560194 |
| 11 | 102699786 | 102742290 - | NM_001109995 | Eftud2   | -173  | 102742463 | 102742663 |
| 11 | 102699786 | 102742290 - | NM_011431    | Eftud2   | -173  | 102742463 | 102742663 |
| 11 | 102742558 | 102746530 + | NM_028492    | Ccdc103  | 0     | 102742463 | 102742663 |
| 11 | 102746483 | 102748046 + | NM_025766    | Fam187a  | -3820 | 102742463 | 102742663 |
| 11 | 102889876 | 102927420 + | NM_008707    | Nmt1     | 33671 | 102923547 | 102923747 |
| 11 | 102889876 | 102927420 + | NM_008707    | Nmt1     | -299  | 102889377 | 102889577 |
| 11 | 102931610 | 102962973 - | NM_152813    | Plcd3    | 7987  | 102954786 | 102954986 |
| 11 | 102931610 | 102962973 - | NM_152813    | Plcd3    | -2933 | 102965906 | 102966106 |
| 11 | 102963002 | 102973514 + | NM_025988    | Acbd4    | -8016 | 102954786 | 102954986 |
| 11 | 102963002 | 102973514 + | NM_025988    | Acbd4    | 2904  | 102965906 | 102966106 |

|    |           |             |              |               |       |           |           |
|----|-----------|-------------|--------------|---------------|-------|-----------|-----------|
| 11 | 103081078 | 103128716 - | NM_016896    | Map3k14       | 21058 | 103107458 | 103107658 |
| 11 | 103192798 | 103225007 - | NM_001205236 | Arhgap27      | 7508  | 103217299 | 103217499 |
| 11 | 103192798 | 103225007 - | NM_001205236 | Arhgap27      | 6222  | 103218585 | 103218785 |
| 11 | 103192798 | 103225007 - | NM_001205236 | Arhgap27      | 17819 | 103206988 | 103207188 |
| 11 | 103192798 | 103206017 - | NM_133715    | Arhgap27      | -971  | 103206988 | 103207188 |
| 11 | 103206067 | 103211441 + | NR_045346    | Arhgap27os3   | 921   | 103206988 | 103207188 |
| 11 | 103226406 | 103273979 - | NM_183034    | Plekhm1       | 360   | 103273419 | 103273619 |
| 11 | 103538163 | 103559025 - | NM_019650    | Gosr2         | 1241  | 103557584 | 103557784 |
| 11 | 103538163 | 103559025 - | NM_019650    | Gosr2         | -3908 | 103562933 | 103563133 |
| 11 | 103538163 | 103559025 - | NM_019650    | Gosr2         | -2974 | 103561999 | 103562199 |
| 11 | 103538163 | 103559025 - | NM_019650    | Gosr2         | 7334  | 103551491 | 103551691 |
| 11 | 103538163 | 103559025 - | NM_019650    | Gosr2         | 6348  | 103552477 | 103552677 |
| 11 | 103538163 | 103559025 - | NM_019650    | Gosr2         | 7989  | 103550836 | 103551036 |
| 11 | 103559038 | 103586888 + | NR_102388    | C130046K22Rik | -1254 | 103557584 | 103557784 |
| 11 | 103559038 | 103586888 + | NR_102388    | C130046K22Rik | 3895  | 103562933 | 103563133 |
| 11 | 103559038 | 103586888 + | NR_102388    | C130046K22Rik | 2961  | 103561999 | 103562199 |
| 11 | 103559038 | 103586888 + | NR_102388    | C130046K22Rik | -7347 | 103551491 | 103551691 |
| 11 | 103559038 | 103586888 + | NR_102388    | C130046K22Rik | -6361 | 103552477 | 103552677 |
| 11 | 103559038 | 103586888 + | NR_102388    | C130046K22Rik | -8002 | 103550836 | 103551036 |
| 11 | 103559038 | 103586888 + | NR_102389    | C130046K22Rik | -1254 | 103557584 | 103557784 |
| 11 | 103559038 | 103586888 + | NR_102389    | C130046K22Rik | 3895  | 103562933 | 103563133 |
| 11 | 103559038 | 103586888 + | NR_102389    | C130046K22Rik | 2961  | 103561999 | 103562199 |
| 11 | 103559038 | 103586888 + | NR_102389    | C130046K22Rik | -7347 | 103551491 | 103551691 |
| 11 | 103559038 | 103586888 + | NR_102389    | C130046K22Rik | -6361 | 103552477 | 103552677 |
| 11 | 103559038 | 103586888 + | NR_102389    | C130046K22Rik | -8002 | 103550836 | 103551036 |
| 11 | 103559038 | 103566984 + | NR_102396    | C130046K22Rik | -1254 | 103557584 | 103557784 |
| 11 | 103559038 | 103566984 + | NR_102396    | C130046K22Rik | 3895  | 103562933 | 103563133 |
| 11 | 103559038 | 103566984 + | NR_102396    | C130046K22Rik | 2961  | 103561999 | 103562199 |
| 11 | 103559038 | 103566984 + | NR_102396    | C130046K22Rik | -7347 | 103551491 | 103551691 |
| 11 | 103559038 | 103566984 + | NR_102396    | C130046K22Rik | -6361 | 103552477 | 103552677 |

|    |           |             |              |               |        |           |           |
|----|-----------|-------------|--------------|---------------|--------|-----------|-----------|
| 11 | 103559038 | 103566984 + | NR_102396    | C130046K22Rik | -8002  | 103550836 | 103551036 |
| 11 | 103635489 | 103679336 + | NM_009521    | Wnt3          | 40647  | 103676136 | 103676336 |
| 11 | 103683097 | 103815371 - | NM_008740    | Nsf           | 126629 | 103688542 | 103688742 |
| 11 | 104092750 | 104193404 + | NM_001038609 | Mapt          | 57824  | 104150574 | 104150774 |
| 11 | 104092750 | 104193404 + | NM_001038609 | Mapt          | 61871  | 104154621 | 104154821 |
| 11 | 104092750 | 104193404 + | NM_001285454 | Mapt          | 57824  | 104150574 | 104150774 |
| 11 | 104092750 | 104193404 + | NM_001285454 | Mapt          | 61871  | 104154621 | 104154821 |
| 11 | 104092750 | 104193404 + | NM_001285455 | Mapt          | 57824  | 104150574 | 104150774 |
| 11 | 104092750 | 104193404 + | NM_001285455 | Mapt          | 61871  | 104154621 | 104154821 |
| 11 | 104092750 | 104193404 + | NM_001285456 | Mapt          | 57824  | 104150574 | 104150774 |
| 11 | 104092750 | 104193404 + | NM_001285456 | Mapt          | 61871  | 104154621 | 104154821 |
| 11 | 104092750 | 104193404 + | NM_010838    | Mapt          | 57824  | 104150574 | 104150774 |
| 11 | 104092750 | 104193404 + | NM_010838    | Mapt          | 61871  | 104154621 | 104154821 |
| 11 | 104363841 | 104411935 - | NM_001285988 | Cdc27         | 13590  | 104398145 | 104398345 |
| 11 | 104363841 | 104411935 - | NM_001285988 | Cdc27         | -231   | 104412166 | 104412366 |
| 11 | 104363841 | 104411935 - | NM_001285989 | Cdc27         | 13590  | 104398145 | 104398345 |
| 11 | 104363841 | 104411935 - | NM_001285989 | Cdc27         | -231   | 104412166 | 104412366 |
| 11 | 104363841 | 104411935 - | NM_001285990 | Cdc27         | 13590  | 104398145 | 104398345 |
| 11 | 104363841 | 104411935 - | NM_001285990 | Cdc27         | -231   | 104412166 | 104412366 |
| 11 | 104363843 | 104411935 - | NM_145436    | Cdc27         | 13590  | 104398145 | 104398345 |
| 11 | 104363843 | 104411935 - | NM_145436    | Cdc27         | -231   | 104412166 | 104412366 |
| 11 | 104411977 | 104448534 + | NM_010858    | Myl4          | 189    | 104412166 | 104412366 |
| 11 | 104469314 | 104531786 + | NM_016780    | Itgb3         | -8420  | 104460694 | 104460894 |
| 11 | 105040121 | 105145274 + | NM_001294331 | Tlk2          | 68575  | 105108696 | 105108896 |
| 11 | 105042841 | 105145274 + | NM_001112705 | Tlk2          | 65855  | 105108696 | 105108896 |
| 11 | 105042841 | 105145274 + | NM_001294329 | Tlk2          | 65855  | 105108696 | 105108896 |
| 11 | 105042841 | 105138188 + | NM_001294330 | Tlk2          | 65855  | 105108696 | 105108896 |
| 11 | 105042841 | 105138188 + | NM_001294334 | Tlk2          | 65855  | 105108696 | 105108896 |
| 11 | 105451300 | 105790618 + | NM_181071    | Tanc2         | 1368   | 105452668 | 105452868 |
| 11 | 105795018 | 105805462 - | NM_007805    | Cyb561        | -5297  | 105810759 | 105810959 |

|    |           |             |              |          |       |           |           |
|----|-----------|-------------|--------------|----------|-------|-----------|-----------|
| 11 | 105795018 | 105805462 - | NM_007805    | Cyb561   | -6509 | 105811971 | 105812171 |
| 11 | 105795018 | 105805462 - | NM_007805    | Cyb561   | -631  | 105806093 | 105806293 |
| 11 | 105795018 | 105805462 - | NM_007805    | Cyb561   | -3522 | 105808984 | 105809184 |
| 11 | 105826921 | 105847009 - | NR_104047    | Gm11651  | 19250 | 105827559 | 105827759 |
| 11 | 105829259 | 105851279 + | NM_001281819 | Ace      | -1500 | 105827559 | 105827759 |
| 11 | 105829259 | 105851279 + | NM_001281819 | Ace      | -6006 | 105823053 | 105823253 |
| 11 | 105829259 | 105851279 + | NM_001281819 | Ace      | -3176 | 105825883 | 105826083 |
| 11 | 105829259 | 105851279 + | NM_207624    | Ace      | -1500 | 105827559 | 105827759 |
| 11 | 105829259 | 105851279 + | NM_207624    | Ace      | -6006 | 105823053 | 105823253 |
| 11 | 105829259 | 105851279 + | NM_207624    | Ace      | -3176 | 105825883 | 105826083 |
| 11 | 105836522 | 105851279 + | NM_009598    | Ace      | -8763 | 105827559 | 105827759 |
| 11 | 105898186 | 105920638 + | NM_027946    | Dcaf7    | 8421  | 105906607 | 105906807 |
| 11 | 105946216 | 106016749 + | NM_011947    | Map3k3   | 50425 | 105996641 | 105996841 |
| 11 | 106258934 | 106349111 - | NM_023913    | Ern1     | 1445  | 106347466 | 106347666 |
| 11 | 106362305 | 106362378 + | NR_030703    | Snord104 | 0     | 106362155 | 106362355 |
| 11 | 106363453 | 106474245 - | NM_198292    | Tex2     | 62565 | 106411480 | 106411680 |
| 11 | 106363453 | 106474245 - | NM_198292    | Tex2     | 5172  | 106468873 | 106469073 |
| 11 | 106363453 | 106474245 - | NM_198292    | Tex2     | 40607 | 106433438 | 106433638 |
| 11 | 106515527 | 106576596 - | NM_001032378 | Pecam1   | -5189 | 106581785 | 106581985 |
| 11 | 106515527 | 106576596 - | NM_001032378 | Pecam1   | -7980 | 106584576 | 106584776 |
| 11 | 106515527 | 106576596 - | NM_001305157 | Pecam1   | -5189 | 106581785 | 106581985 |
| 11 | 106515527 | 106576596 - | NM_001305157 | Pecam1   | -7980 | 106584576 | 106584776 |
| 11 | 106515527 | 106576596 - | NM_001305158 | Pecam1   | -5189 | 106581785 | 106581985 |
| 11 | 106515527 | 106576596 - | NM_001305158 | Pecam1   | -7980 | 106584576 | 106584776 |
| 11 | 106515527 | 106576596 - | NM_008816    | Pecam1   | -5189 | 106581785 | 106581985 |
| 11 | 106515527 | 106576596 - | NM_008816    | Pecam1   | -7980 | 106584576 | 106584776 |
| 11 | 106681378 | 106782030 - | NM_025481    | Smurf2   | -6253 | 106788283 | 106788483 |
| 11 | 106681378 | 106782030 - | NM_025481    | Smurf2   | 37668 | 106744162 | 106744362 |
| 11 | 106849943 | 106860840 - | NM_010655    | Kpna2    | 4520  | 106856120 | 106856320 |
| 11 | 106894395 | 106993237 - | NM_176850    | Bptf     | 7141  | 106985896 | 106986096 |

|    |           |             |              |               |        |           |           |
|----|-----------|-------------|--------------|---------------|--------|-----------|-----------|
| 11 | 106894395 | 106993237 - | NM_176850    | Bptf          | 87329  | 106905708 | 106905908 |
| 11 | 106894395 | 106993237 - | NM_176850    | Bptf          | 22994  | 106970043 | 106970243 |
| 11 | 107794701 | 108205203 - | NM_011101    | Prkca         | 102583 | 108102420 | 108102620 |
| 11 | 107794701 | 108205203 - | NM_011101    | Prkca         | -9057  | 108214260 | 108214460 |
| 11 | 107794701 | 108205203 - | NM_011101    | Prkca         | 36491  | 108168512 | 108168712 |
| 11 | 107794701 | 108205203 - | NM_011101    | Prkca         | 203651 | 108001352 | 108001552 |
| 11 | 107794701 | 108205203 - | NM_011101    | Prkca         | 145132 | 108059871 | 108060071 |
| 11 | 107794701 | 108205203 - | NM_011101    | Prkca         | 215085 | 107989918 | 107990118 |
| 11 | 107794701 | 108205203 - | NM_011101    | Prkca         | 242139 | 107962864 | 107963064 |
| 11 | 108286580 | 108721930 + | NM_029606    | Cep112        | 327143 | 108613723 | 108613923 |
| 11 | 108286580 | 108721930 + | NM_029606    | Cep112        | 192070 | 108478650 | 108478850 |
| 11 | 108543923 | 108721930 + | NM_145688    | Cep112        | 69800  | 108613723 | 108613923 |
| 11 | 108543932 | 108721930 + | NM_029586    | Cep112        | 69791  | 108613723 | 108613923 |
| 11 | 108781663 | 108812096 + | NM_015732    | Axin2         | -9146  | 108772317 | 108772517 |
| 11 | 109208181 | 109214966 + | NR_027883    | 1700096J18Rik | 2938   | 109211119 | 109211319 |
| 11 | 109216092 | 109224969 - | NR_038097    | Gm11696       | -3789  | 109228758 | 109228958 |
| 11 | 109224108 | 109262684 + | NM_010303    | Gna13         | 16495  | 109240603 | 109240803 |
| 11 | 109224108 | 109262684 + | NM_010303    | Gna13         | 17614  | 109241722 | 109241922 |
| 11 | 109224108 | 109262684 + | NM_010303    | Gna13         | 4650   | 109228758 | 109228958 |
| 11 | 109334688 | 109434644 + | NM_028710    | Arsg          | 72008  | 109406696 | 109406896 |
| 11 | 109334688 | 109434644 + | NM_028710    | Arsg          | 82861  | 109417549 | 109417749 |
| 11 | 109405025 | 109434644 + | NM_001166177 | Arsg          | 1671   | 109406696 | 109406896 |
| 11 | 109405025 | 109434644 + | NM_001166177 | Arsg          | 12524  | 109417549 | 109417749 |
| 11 | 109434835 | 109472704 - | NM_145940    | Wipi1         | 24039  | 109448465 | 109448665 |
| 11 | 109534240 | 109583571 - | NM_153782    | Fam20a        | 12187  | 109571184 | 109571384 |
| 11 | 109534240 | 109583571 - | NM_153782    | Fam20a        | 15983  | 109567388 | 109567588 |
| 11 | 109794720 | 109857131 - | NM_013851    | Abca8b        | 25061  | 109831870 | 109832070 |
| 11 | 109794720 | 109857131 - | NM_013851    | Abca8b        | 11909  | 109845022 | 109845222 |
| 11 | 109794720 | 109857131 - | NM_013851    | Abca8b        | 40363  | 109816568 | 109816768 |
| 11 | 110260436 | 110374952 + | NM_011943    | Map2k6        | 64202  | 110324638 | 110324838 |



|    |           |             |              |               |        |           |           |
|----|-----------|-------------|--------------|---------------|--------|-----------|-----------|
| 11 | 110260436 | 110374952 + | NM_011943    | Map2k6        | 77855  | 110338291 | 110338491 |
| 11 | 112905220 | 113063153 - | NR_015556    | 2610035D17Rik | 148954 | 112913999 | 112914199 |
| 11 | 112905220 | 113063153 - | NR_015556    | 2610035D17Rik | 63039  | 112999914 | 113000114 |
| 11 | 113106169 | 113427130 - | NM_001166503 | Slc39a11      | 77853  | 113349077 | 113349277 |
| 11 | 113106169 | 113427130 - | NM_001166503 | Slc39a11      | 272320 | 113154610 | 113154810 |
| 11 | 113106169 | 113427130 - | NM_001166503 | Slc39a11      | 268735 | 113158195 | 113158395 |
| 11 | 113106169 | 113427130 - | NM_001166503 | Slc39a11      | 305870 | 113121060 | 113121260 |
| 11 | 113106169 | 113427130 - | NM_027216    | Slc39a11      | 77853  | 113349077 | 113349277 |
| 11 | 113106169 | 113427130 - | NM_027216    | Slc39a11      | 272320 | 113154610 | 113154810 |
| 11 | 113106169 | 113427130 - | NM_027216    | Slc39a11      | 268735 | 113158195 | 113158395 |
| 11 | 113106169 | 113427130 - | NM_027216    | Slc39a11      | 305870 | 113121060 | 113121260 |
| 11 | 113510843 | 113523716 + | NM_013581    | Cog1          | -5188  | 113505455 | 113505655 |
| 11 | 113522633 | 113545466 - | NM_138598    | Fam104a       | 17650  | 113527616 | 113527816 |
| 11 | 113588164 | 113613130 - | NM_001163346 | Cdc42ep4      | 2788   | 113610142 | 113610342 |
| 11 | 113588164 | 113613130 - | NM_001163346 | Cdc42ep4      | 1871   | 113611059 | 113611259 |
| 11 | 113588164 | 113612475 - | NM_020006    | Cdc42ep4      | 2133   | 113610142 | 113610342 |
| 11 | 113588164 | 113612475 - | NM_020006    | Cdc42ep4      | 1216   | 113611059 | 113611259 |
| 11 | 113642104 | 113927266 - | NM_172800    | Sdk2          | 266767 | 113660299 | 113660499 |
| 11 | 113642104 | 113927266 - | NM_172800    | Sdk2          | 249595 | 113677471 | 113677671 |
| 11 | 114529857 | 114533646 + | NM_001048057 | Rpl38         | 3100   | 114532957 | 114533157 |
| 11 | 114529857 | 114533646 + | NM_023372    | Rpl38         | 3100   | 114532957 | 114533157 |
| 11 | 114530095 | 114533646 + | NM_001048058 | Rpl38         | 2862   | 114532957 | 114533157 |
| 11 | 114536782 | 114582299 + | NM_053273    | Ttyh2         | -3625  | 114532957 | 114533157 |
| 11 | 115048801 | 115108340 + | NM_001033393 | Tmem104       | -4985  | 115043616 | 115043816 |
| 11 | 115196048 | 115208241 + | NM_027132    | Otop3         | 1394   | 115197442 | 115197642 |
| 11 | 115209023 | 115229034 - | NM_175454    | Hid1          | -6282  | 115235316 | 115235516 |
| 11 | 115209023 | 115229034 - | NM_175454    | Hid1          | 19986  | 115208848 | 115209048 |
| 11 | 115209023 | 115229034 - | NM_175454    | Hid1          | 17367  | 115211467 | 115211667 |
| 11 | 115243230 | 115257447 + | NM_001080929 | Cdr2l         | -7714  | 115235316 | 115235516 |
| 11 | 115277011 | 115281234 - | NM_027862    | Atp5h         | 392    | 115280642 | 115280842 |

|    |           |             |              |               |       |           |           |
|----|-----------|-------------|--------------|---------------|-------|-----------|-----------|
| 11 | 115277011 | 115281234 - | NM_027862    | Atp5h         | -1467 | 115282701 | 115282901 |
| 11 | 115281440 | 115292589 + | NM_183285    | Kctd2         | -598  | 115280642 | 115280842 |
| 11 | 115281440 | 115292589 + | NM_183285    | Kctd2         | 1261  | 115282701 | 115282901 |
| 11 | 115281440 | 115292589 + | NM_183285    | Kctd2         | -6629 | 115274611 | 115274811 |
| 11 | 115301859 | 115309583 + | NM_001033775 | Trim80        | -7452 | 115294207 | 115294407 |
| 11 | 115301859 | 115309583 + | NM_001033775 | Trim80        | 7678  | 115309537 | 115309737 |
| 11 | 115309275 | 115309375 - | NR_039549    | Mir3968       | -9163 | 115318538 | 115318738 |
| 11 | 115309275 | 115309375 - | NR_039549    | Mir3968       | -162  | 115309537 | 115309737 |
| 11 | 115323787 | 115335713 + | NM_001080934 | Slc16a5       | -5049 | 115318538 | 115318738 |
| 11 | 115358667 | 115375685 - | NM_008258    | Hn1           | 10047 | 115365438 | 115365638 |
| 11 | 115445569 | 115465231 - | NM_001252067 | Gga3          | -8300 | 115473531 | 115473731 |
| 11 | 115445569 | 115465231 - | NM_001252067 | Gga3          | 567   | 115464464 | 115464664 |
| 11 | 115445569 | 115465231 - | NM_173048    | Gga3          | -8300 | 115473531 | 115473731 |
| 11 | 115445569 | 115465231 - | NM_173048    | Gga3          | 567   | 115464464 | 115464664 |
| 11 | 115465465 | 115468939 + | NM_025305    | Mrps7         | -801  | 115464464 | 115464664 |
| 11 | 115469233 | 115474284 - | NM_001243584 | Mif4gd        | 553   | 115473531 | 115473731 |
| 11 | 115469233 | 115473818 - | NM_001243586 | Mif4gd        | 87    | 115473531 | 115473731 |
| 11 | 115469233 | 115474284 - | NM_001243587 | Mif4gd        | 553   | 115473531 | 115473731 |
| 11 | 115469233 | 115473818 - | NM_027162    | Mif4gd        | 87    | 115473531 | 115473731 |
| 11 | 115626747 | 115660348 + | NM_028014    | 2310067B10Rik | 13485 | 115640232 | 115640432 |
| 11 | 115685372 | 115717095 + | NM_001252532 | Llgl2         | 18236 | 115703608 | 115703808 |
| 11 | 115685372 | 115717095 + | NM_145438    | Llgl2         | 18236 | 115703608 | 115703808 |
| 11 | 115753909 | 115794807 - | NM_130454    | Recql5        | -6595 | 115801402 | 115801602 |
| 11 | 115753909 | 115794807 - | NM_130454    | Recql5        | 22068 | 115772539 | 115772739 |
| 11 | 115773331 | 115775232 + | NM_001162998 | Smim6         | -592  | 115772539 | 115772739 |
| 11 | 115794973 | 115826849 + | NM_020483    | Sap30bp       | 22133 | 115817106 | 115817306 |
| 11 | 115794973 | 115826849 + | NM_020483    | Sap30bp       | 6429  | 115801402 | 115801602 |
| 11 | 115836039 | 115869726 + | NM_001005608 | Itgb4         | -3545 | 115832294 | 115832494 |
| 11 | 115836039 | 115869726 + | NM_133663    | Itgb4         | -3545 | 115832294 | 115832494 |
| 11 | 115891630 | 115922529 + | NM_001286006 | Unk           | 27259 | 115918889 | 115919089 |

|    |           |             |              |          |       |           |           |
|----|-----------|-------------|--------------|----------|-------|-----------|-----------|
| 11 | 115891630 | 115922529 + | NM_172569    | Unk      | 27259 | 115918889 | 115919089 |
| 11 | 115923410 | 115939276 - | NM_001009573 | Unc13d   | 325   | 115938751 | 115938951 |
| 11 | 116033197 | 116060360 - | NM_001271898 | Acox1    | -738  | 116061098 | 116061298 |
| 11 | 116033197 | 116060360 - | NM_001271898 | Acox1    | -2832 | 116063192 | 116063392 |
| 11 | 116033197 | 116060360 - | NM_015729    | Acox1    | -738  | 116061098 | 116061298 |
| 11 | 116033197 | 116060360 - | NM_015729    | Acox1    | -2832 | 116063192 | 116063392 |
| 11 | 116060169 | 116076633 + | NM_027107    | Ten1     | 11967 | 116072136 | 116072336 |
| 11 | 116060169 | 116076633 + | NM_027107    | Ten1     | 929   | 116061098 | 116061298 |
| 11 | 116060169 | 116076633 + | NM_027107    | Ten1     | 3023  | 116063192 | 116063392 |
| 11 | 116077316 | 116081602 + | NR_004853    | Cdk3-ps  | -4980 | 116072136 | 116072336 |
| 11 | 116197659 | 116274347 - | NM_027258    | Rnf157   | 45270 | 116228877 | 116229077 |
| 11 | 116197659 | 116274347 - | NM_027258    | Rnf157   | 61253 | 116212894 | 116213094 |
| 11 | 116295408 | 116300392 + | NM_176902    | Ubal2    | -2332 | 116292876 | 116293076 |
| 11 | 116295408 | 116300392 + | NM_176902    | Ubal2    | -4342 | 116290866 | 116291066 |
| 11 | 116295408 | 116300392 + | NM_176902    | Ubal2    | -3025 | 116292183 | 116292383 |
| 11 | 116295527 | 116300346 + | NR_003376    | Gm7367   | -2451 | 116292876 | 116293076 |
| 11 | 116295527 | 116300346 + | NR_003376    | Gm7367   | -4461 | 116290866 | 116291066 |
| 11 | 116295527 | 116300346 + | NR_003376    | Gm7367   | -3144 | 116292183 | 116292383 |
| 11 | 116332130 | 116351661 - | NM_026364    | Prpsap1  | -1321 | 116352982 | 116353182 |
| 11 | 116332130 | 116351661 - | NM_026364    | Prpsap1  | -3019 | 116354680 | 116354880 |
| 11 | 116332130 | 116351661 - | NM_026364    | Prpsap1  | 1015  | 116350446 | 116350646 |
| 11 | 116459479 | 116485567 - | NM_001167680 | Rhbdf2   | 3742  | 116481625 | 116481825 |
| 11 | 116459479 | 116488334 - | NM_172572    | Rhbdf2   | 6509  | 116481625 | 116481825 |
| 11 | 116613481 | 116619198 + | NR_003364    | BC018473 | 5072  | 116618553 | 116618753 |
| 11 | 116613481 | 116619198 + | NR_003364    | BC018473 | -1354 | 116611927 | 116612127 |
| 11 | 116613481 | 116619198 + | NR_003364    | BC018473 | 1663  | 116615144 | 116615344 |
| 11 | 116613481 | 116619198 + | NR_003364    | BC018473 | 3110  | 116616591 | 116616791 |
| 11 | 116613481 | 116619198 + | NR_003364    | BC018473 | 969   | 116614450 | 116614650 |
| 11 | 116613481 | 116619198 + | NR_003364    | BC018473 | -3969 | 116609312 | 116609512 |
| 11 | 116613481 | 116619198 + | NR_003364    | BC018473 | -3362 | 116609919 | 116610119 |

|    |           |             |              |            |        |           |           |
|----|-----------|-------------|--------------|------------|--------|-----------|-----------|
| 11 | 116613481 | 116619198 + | NR_003364    | BC018473   | -5030  | 116608251 | 116608451 |
| 11 | 116613481 | 116619198 + | NR_003364    | BC018473   | -5689  | 116607592 | 116607792 |
| 11 | 116626339 | 116636822 - | NM_011371    | St6galnac1 | -7375  | 116644197 | 116644397 |
| 11 | 116626339 | 116636822 - | NM_011371    | St6galnac1 | 4195   | 116632427 | 116632627 |
| 11 | 116976486 | 117020583 + | NM_001166506 | Sec14l1    | 21777  | 116998263 | 116998463 |
| 11 | 116976486 | 117020583 + | NM_001166507 | Sec14l1    | 21777  | 116998263 | 116998463 |
| 11 | 116976486 | 117020583 + | NM_028777    | Sec14l1    | 21777  | 116998263 | 116998463 |
| 11 | 117060975 | 117223640 + | NM_001113486 | Sept9      | 136636 | 117197611 | 117197811 |
| 11 | 117060975 | 117223640 + | NM_001113486 | Sept9      | 113175 | 117174150 | 117174350 |
| 11 | 117060975 | 117223640 + | NM_001113486 | Sept9      | 4833   | 117065808 | 117066008 |
| 11 | 117127560 | 117223640 + | NM_001113487 | Sept9      | 70051  | 117197611 | 117197811 |
| 11 | 117127560 | 117223640 + | NM_001113487 | Sept9      | 46590  | 117174150 | 117174350 |
| 11 | 117193029 | 117223640 + | NM_017380    | Sept9      | 4582   | 117197611 | 117197811 |
| 11 | 117193627 | 117223640 + | NM_001113488 | Sept9      | 3984   | 117197611 | 117197811 |
| 11 | 117275703 | 117276683 + | NR_132097    | Gm11729    | 1273   | 117276976 | 117277176 |
| 11 | 117275703 | 117276683 + | NR_132097    | Gm11729    | -6324  | 117269179 | 117269379 |
| 11 | 117515603 | 117624754 + | NM_198022    | Tnrc6c     | 1407   | 117517010 | 117517210 |
| 11 | 117676833 | 117687329 - | NM_001271729 | Tk1        | -2813  | 117690142 | 117690342 |
| 11 | 117676833 | 117687329 - | NM_001271729 | Tk1        | -6043  | 117693372 | 117693572 |
| 11 | 117676833 | 117687329 - | NM_009387    | Tk1        | -2813  | 117690142 | 117690342 |
| 11 | 117676833 | 117687329 - | NM_009387    | Tk1        | -6043  | 117693372 | 117693572 |
| 11 | 117687233 | 117701223 + | NM_027827    | Afmid      | 2909   | 117690142 | 117690342 |
| 11 | 117687233 | 117701223 + | NM_027827    | Afmid      | 6139   | 117693372 | 117693572 |
| 11 | 117729263 | 117734841 - | NM_027919    | Tha1       | -8410  | 117743251 | 117743451 |
| 11 | 117729263 | 117734841 - | NM_027919    | Tha1       | -4964  | 117739805 | 117740005 |
| 11 | 117827401 | 117830681 - | NM_007707    | Socs3      | -873   | 117831554 | 117831754 |
| 11 | 117827401 | 117830681 - | NM_007707    | Socs3      | -5320  | 117836001 | 117836201 |
| 11 | 117827401 | 117830681 - | NM_007707    | Socs3      | -452   | 117831133 | 117831333 |
| 11 | 118120967 | 118151559 - | NM_001033528 | Usp36      | 24377  | 118126982 | 118127182 |
| 11 | 118254066 | 118263246 - | NM_011150    | Lgals3bp   | -8061  | 118271307 | 118271507 |

|    |           |             |              |          |        |           |           |
|----|-----------|-------------|--------------|----------|--------|-----------|-----------|
| 11 | 118254066 | 118263246 - | NM_011150    | Lgals3bp | 1696   | 118261350 | 118261550 |
| 11 | 118267603 | 118280433 - | NM_001025617 | Cant1    | 8926   | 118271307 | 118271507 |
| 11 | 118267603 | 118280433 - | NM_001025618 | Cant1    | 8926   | 118271307 | 118271507 |
| 11 | 118267603 | 118277115 - | NM_001267591 | Cant1    | 5608   | 118271307 | 118271507 |
| 11 | 118267603 | 118280433 - | NM_001267592 | Cant1    | 8926   | 118271307 | 118271507 |
| 11 | 118267603 | 118280433 - | NM_029502    | Cant1    | 8926   | 118271307 | 118271507 |
| 11 | 118338274 | 118350513 + | NM_172573    | Engase   | -9116  | 118328958 | 118329158 |
| 11 | 118338274 | 118350513 + | NM_172573    | Engase   | -6059  | 118332015 | 118332215 |
| 11 | 118351074 | 118770887 - | NM_001024931 | Rbfox3   | 396780 | 118373907 | 118374107 |
| 11 | 118351074 | 118770887 - | NM_001024931 | Rbfox3   | 36772  | 118733915 | 118734115 |
| 11 | 118351074 | 118770887 - | NM_001024931 | Rbfox3   | 38822  | 118731865 | 118732065 |
| 11 | 118351074 | 118770887 - | NM_001039167 | Rbfox3   | 396780 | 118373907 | 118374107 |
| 11 | 118351074 | 118770887 - | NM_001039167 | Rbfox3   | 36772  | 118733915 | 118734115 |
| 11 | 118351074 | 118770887 - | NM_001039167 | Rbfox3   | 38822  | 118731865 | 118732065 |
| 11 | 118351074 | 118770887 - | NM_001039168 | Rbfox3   | 396780 | 118373907 | 118374107 |
| 11 | 118351074 | 118770887 - | NM_001039168 | Rbfox3   | 36772  | 118733915 | 118734115 |
| 11 | 118351074 | 118770887 - | NM_001039168 | Rbfox3   | 38822  | 118731865 | 118732065 |
| 11 | 118351074 | 118770887 - | NM_001285436 | Rbfox3   | 396780 | 118373907 | 118374107 |
| 11 | 118351074 | 118770887 - | NM_001285436 | Rbfox3   | 36772  | 118733915 | 118734115 |
| 11 | 118351074 | 118770887 - | NM_001285436 | Rbfox3   | 38822  | 118731865 | 118732065 |
| 11 | 118351074 | 118772912 - | NM_001285437 | Rbfox3   | 398805 | 118373907 | 118374107 |
| 11 | 118351074 | 118772912 - | NM_001285437 | Rbfox3   | 38797  | 118733915 | 118734115 |
| 11 | 118351074 | 118772912 - | NM_001285437 | Rbfox3   | 40847  | 118731865 | 118732065 |
| 11 | 118351074 | 118622356 - | NM_001285438 | Rbfox3   | 248249 | 118373907 | 118374107 |
| 11 | 118849502 | 118854156 + | NM_001030291 | Enpp7    | -9200  | 118840102 | 118840302 |
| 11 | 118849502 | 118854156 + | NM_001030291 | Enpp7    | -30    | 118849272 | 118849472 |
| 11 | 118849502 | 118854156 + | NM_001030291 | Enpp7    | -5285  | 118844017 | 118844217 |
| 11 | 118899750 | 118902228 - | NM_013926    | Cbx8     | -6030  | 118908258 | 118908458 |
| 11 | 119004357 | 119089814 - | NM_172443    | Tbc1d16  | 12924  | 119076690 | 119076890 |
| 11 | 119464219 | 119760906 + | NM_001306081 | Rptor    | 8339   | 119472558 | 119472758 |

|    |           |             |              |               |       |           |           |
|----|-----------|-------------|--------------|---------------|-------|-----------|-----------|
| 11 | 119464219 | 119760906 + | NM_001306081 | Rptor         | 752   | 119464971 | 119465171 |
| 11 | 119464219 | 119760906 + | NM_028898    | Rptor         | 8339  | 119472558 | 119472758 |
| 11 | 119464219 | 119760906 + | NM_028898    | Rptor         | 752   | 119464971 | 119465171 |
| 11 | 119743603 | 119790232 + | NR_039557    | Mir5098       | 22601 | 119766204 | 119766404 |
| 11 | 119775124 | 119780867 + | NM_001085498 | Chmp6         | -8720 | 119766204 | 119766404 |
| 11 | 119965265 | 120012666 - | NM_001164798 | Slc38a10      | 19855 | 119992611 | 119992811 |
| 11 | 119965265 | 120012666 - | NM_001164798 | Slc38a10      | 1500  | 120010966 | 120011166 |
| 11 | 119965265 | 120012666 - | NM_001164799 | Slc38a10      | 19855 | 119992611 | 119992811 |
| 11 | 119965265 | 120012666 - | NM_001164799 | Slc38a10      | 1500  | 120010966 | 120011166 |
| 11 | 119965265 | 120012666 - | NM_001164800 | Slc38a10      | 19855 | 119992611 | 119992811 |
| 11 | 119965265 | 120012666 - | NM_001164800 | Slc38a10      | 1500  | 120010966 | 120011166 |
| 11 | 119965265 | 120012666 - | NM_024249    | Slc38a10      | 19855 | 119992611 | 119992811 |
| 11 | 119965265 | 120012666 - | NM_024249    | Slc38a10      | 1500  | 120010966 | 120011166 |
| 11 | 119980186 | 120012666 - | NM_001164802 | Slc38a10      | 19855 | 119992611 | 119992811 |
| 11 | 119980186 | 120012666 - | NM_001164802 | Slc38a10      | 1500  | 120010966 | 120011166 |
| 11 | 119985158 | 120012666 - | NM_001164801 | Slc38a10      | 19855 | 119992611 | 119992811 |
| 11 | 119985158 | 120012666 - | NM_001164801 | Slc38a10      | 1500  | 120010966 | 120011166 |
| 11 | 120047964 | 120051171 - | NR_030682    | 2810410L24Rik | 2266  | 120048705 | 120048905 |
| 11 | 120094261 | 120153612 + | NM_198423    | Bahcc1        | -1261 | 120092800 | 120093000 |
| 11 | 120421618 | 120434251 - | NM_011032    | P4hb          | 1002  | 120433049 | 120433249 |
| 11 | 120421618 | 120434251 - | NM_011032    | P4hb          | 1556  | 120432495 | 120432695 |
| 11 | 120471401 | 120479205 - | NM_024229    | Pcyt2         | 761   | 120478244 | 120478444 |
| 11 | 120687856 | 120794187 - | NM_027745    | Ccdc57        | 27946 | 120766041 | 120766241 |
| 11 | 120809798 | 120820315 + | NM_030696    | Slc16a3       | 2570  | 120812368 | 120812568 |
| 11 | 120810381 | 120820315 + | NM_001038653 | Slc16a3       | 1987  | 120812368 | 120812568 |
| 11 | 120810381 | 120820315 + | NM_001038654 | Slc16a3       | 1987  | 120812368 | 120812568 |
| 11 | 120823055 | 120852648 - | NM_027874    | Csnk1d        | 10607 | 120841841 | 120842041 |
| 11 | 120823055 | 120852648 - | NM_139059    | Csnk1d        | 10607 | 120841841 | 120842041 |
| 11 | 120898063 | 120900793 - | NM_009854    | Cd7           | -8680 | 120909473 | 120909673 |
| 11 | 120898063 | 120900793 - | NM_009854    | Cd7           | -1605 | 120902398 | 120902598 |

|    |           |             |              |               |        |           |           |
|----|-----------|-------------|--------------|---------------|--------|-----------|-----------|
| 11 | 120914737 | 120924884 - | NM_026907    | Sectm1b       | -4584  | 120929468 | 120929668 |
| 11 | 120914737 | 120924884 - | NM_026907    | Sectm1b       | -418   | 120925302 | 120925502 |
| 11 | 120928717 | 120942454 - | NM_145373    | Sectm1a       | -7947  | 120950401 | 120950601 |
| 11 | 120928717 | 120942454 - | NM_145373    | Sectm1a       | -9048  | 120951502 | 120951702 |
| 11 | 120928717 | 120942454 - | NM_145373    | Sectm1a       | 12786  | 120929468 | 120929668 |
| 11 | 120928717 | 120942454 - | NM_145373    | Sectm1a       | -3830  | 120946284 | 120946484 |
| 11 | 121188517 | 121215762 - | NM_025793    | Wdr45b        | 1534   | 121214028 | 121214228 |
| 11 | 121313263 | 121478485 + | NM_029878    | Tbcd          | 1822   | 121315085 | 121315285 |
| 11 | 121563741 | 121578704 + | NM_144797    | Metrn1        | 10898  | 121574639 | 121574839 |
| 12 | 3403883   | 3426748 -   | NR_030694    | 1110002L01Rik | -9609  | 3436357   | 3436557   |
| 12 | 3426857   | 3506850 +   | NM_001270988 | Asxl2         | 9500   | 3436357   | 3436557   |
| 12 | 3426857   | 3506850 +   | NM_172421    | Asxl2         | 9500   | 3436357   | 3436557   |
| 12 | 3572391   | 3781399 +   | NM_001162465 | Dtnb          | 140660 | 3713051   | 3713251   |
| 12 | 3572391   | 3781399 +   | NM_001162465 | Dtnb          | 189745 | 3762136   | 3762336   |
| 12 | 3572391   | 3781399 +   | NR_027869    | Dtnb          | 140660 | 3713051   | 3713251   |
| 12 | 3572391   | 3781399 +   | NR_027869    | Dtnb          | 189745 | 3762136   | 3762336   |
| 12 | 3572391   | 3781399 +   | NR_027870    | Dtnb          | 140660 | 3713051   | 3713251   |
| 12 | 3572391   | 3781399 +   | NR_027870    | Dtnb          | 189745 | 3762136   | 3762336   |
| 12 | 3573041   | 3781399 +   | NM_007886    | Dtnb          | 140010 | 3713051   | 3713251   |
| 12 | 3573041   | 3781399 +   | NM_007886    | Dtnb          | 189095 | 3762136   | 3762336   |
| 12 | 3806980   | 3914444 +   | NM_007872    | Dnmt3a        | 30389  | 3837369   | 3837569   |
| 12 | 3806980   | 3914444 +   | NM_007872    | Dnmt3a        | 85373  | 3892353   | 3892553   |
| 12 | 3806980   | 3914444 +   | NM_007872    | Dnmt3a        | 83323  | 3890303   | 3890503   |
| 12 | 3807160   | 3914444 +   | NM_001271753 | Dnmt3a        | 30209  | 3837369   | 3837569   |
| 12 | 3807160   | 3914444 +   | NM_001271753 | Dnmt3a        | 85193  | 3892353   | 3892553   |
| 12 | 3807160   | 3914444 +   | NM_001271753 | Dnmt3a        | 83143  | 3890303   | 3890503   |
| 12 | 3891744   | 3914444 +   | NM_153743    | Dnmt3a        | 609    | 3892353   | 3892553   |
| 12 | 3891744   | 3914444 +   | NM_153743    | Dnmt3a        | -1241  | 3890303   | 3890503   |
| 12 | 3962554   | 4038916 -   | NM_001082483 | Efr3b         | 2599   | 4036117   | 4036317   |
| 12 | 3962554   | 4038916 -   | NM_001082483 | Efr3b         | -7223  | 4046139   | 4046339   |

|    |          |            |              |         |        |          |          |
|----|----------|------------|--------------|---------|--------|----------|----------|
| 12 | 3962554  | 4038916 -  | NM_001082483 | Efr3b   | 56300  | 3982416  | 3982616  |
| 12 | 3962554  | 4038916 -  | NM_001082483 | Efr3b   | 5449   | 4033267  | 4033467  |
| 12 | 4133397  | 4213525 +  | NM_001159536 | Adcy3   | 51240  | 4184637  | 4184837  |
| 12 | 4133397  | 4213525 +  | NM_001159537 | Adcy3   | 51240  | 4184637  | 4184837  |
| 12 | 4134153  | 4213525 +  | NM_138305    | Adcy3   | 50484  | 4184637  | 4184837  |
| 12 | 4211672  | 4234295 -  | NM_134046    | Cenpo   | 13     | 4234082  | 4234282  |
| 12 | 4234027  | 4240124 +  | NM_001204912 | Ptrhd1  | 55     | 4234082  | 4234282  |
| 12 | 4247362  | 4484061 -  | NM_010881    | Ncoa1   | 123756 | 4360105  | 4360305  |
| 12 | 4247362  | 4484061 -  | NM_010881    | Ncoa1   | 8446   | 4475415  | 4475615  |
| 12 | 4247362  | 4484061 -  | NM_010881    | Ncoa1   | 104358 | 4379503  | 4379703  |
| 12 | 4885838  | 4914327 -  | NM_145441    | Ubxn2a  | -5912  | 4920239  | 4920439  |
| 12 | 4885838  | 4914327 -  | NM_145441    | Ubxn2a  | 826    | 4913301  | 4913501  |
| 12 | 4924159  | 5054217 +  | NM_001099628 | Atad2b  | -3720  | 4920239  | 4920439  |
| 12 | 7984483  | 8023646 +  | NM_009693    | Apob    | 14001  | 7998484  | 7998684  |
| 12 | 8214913  | 8292566 +  | NM_172401    | Ldah    | 36551  | 8251464  | 8251664  |
| 12 | 8214932  | 8283030 +  | NM_001167768 | Ldah    | 36532  | 8251464  | 8251664  |
| 12 | 8214933  | 8292566 +  | NM_001167767 | Ldah    | 36531  | 8251464  | 8251664  |
| 12 | 8535289  | 8546373 -  | NM_001038660 | Slc7a15 | -9483  | 8555856  | 8556056  |
| 12 | 8535289  | 8546373 -  | NM_001038660 | Slc7a15 | 4286   | 8541887  | 8542087  |
| 12 | 8535289  | 8605873 -  | NM_177802    | Slc7a15 | 42589  | 8563084  | 8563284  |
| 12 | 8535289  | 8605873 -  | NM_177802    | Slc7a15 | 26920  | 8578753  | 8578953  |
| 12 | 8535289  | 8605873 -  | NM_177802    | Slc7a15 | 43601  | 8562072  | 8562272  |
| 12 | 8535289  | 8605873 -  | NM_177802    | Slc7a15 | 43258  | 8562415  | 8562615  |
| 12 | 8535289  | 8605873 -  | NM_177802    | Slc7a15 | 49817  | 8555856  | 8556056  |
| 12 | 8535289  | 8605873 -  | NM_177802    | Slc7a15 | 63786  | 8541887  | 8542087  |
| 12 | 8545004  | 8546373 -  | NM_001286385 | Slc7a15 | -9483  | 8555856  | 8556056  |
| 12 | 9036803  | 9043201 +  | NM_029321    | Ttc32   | -35    | 9036568  | 9036768  |
| 12 | 9036803  | 9043201 +  | NM_029321    | Ttc32   | 490    | 9037293  | 9037493  |
| 12 | 10397586 | 10402369 + | NM_023697    | Rdh14   | 924    | 10398510 | 10398710 |
| 12 | 12942899 | 12948643 - | NM_008709    | Mycn    | -3771  | 12952414 | 12952614 |



|    |          |            |              |           |        |          |          |
|----|----------|------------|--------------|-----------|--------|----------|----------|
| 12 | 16542475 | 16596577 - | NM_001130412 | Lpin1     | 50801  | 16545576 | 16545776 |
| 12 | 16542475 | 16596577 - | NM_015763    | Lpin1     | 50801  | 16545576 | 16545776 |
| 12 | 16542475 | 16596577 - | NM_172950    | Lpin1     | 50801  | 16545576 | 16545776 |
| 12 | 16677421 | 16764046 - | NM_001252071 | Greb1     | 30906  | 16732940 | 16733140 |
| 12 | 16677421 | 16807693 - | NM_015764    | Greb1     | 74553  | 16732940 | 16733140 |
| 12 | 16901784 | 16995081 + | NM_009072    | Rock2     | 46993  | 16948777 | 16948977 |
| 12 | 16901784 | 16995081 + | NM_009072    | Rock2     | 25394  | 16927178 | 16927378 |
| 12 | 17273401 | 17291577 + | NM_027959    | Pdia6     | -9027  | 17264174 | 17264374 |
| 12 | 17551679 | 17558309 + | NM_013614    | Odc1      | -6464  | 17545015 | 17545215 |
| 12 | 17697620 | 17798733 + | NM_016677    | Hpcal1    | 35303  | 17732923 | 17733123 |
| 12 | 21117617 | 21276033 + | NM_001004364 | Asap2     | 97587  | 21215204 | 21215404 |
| 12 | 21117617 | 21276033 + | NM_001004364 | Asap2     | 115414 | 21233031 | 21233231 |
| 12 | 21117617 | 21276033 + | NM_001004364 | Asap2     | 22731  | 21140348 | 21140548 |
| 12 | 21117617 | 21276033 + | NM_001004364 | Asap2     | 11969  | 21129586 | 21129786 |
| 12 | 21117617 | 21276033 + | NM_001098168 | Asap2     | 97587  | 21215204 | 21215404 |
| 12 | 21117617 | 21276033 + | NM_001098168 | Asap2     | 115414 | 21233031 | 21233231 |
| 12 | 21117617 | 21276033 + | NM_001098168 | Asap2     | 22731  | 21140348 | 21140548 |
| 12 | 21117617 | 21276033 + | NM_001098168 | Asap2     | 11969  | 21129586 | 21129786 |
| 12 | 21117617 | 21276033 + | NM_001135192 | Asap2     | 97587  | 21215204 | 21215404 |
| 12 | 21117617 | 21276033 + | NM_001135192 | Asap2     | 115414 | 21233031 | 21233231 |
| 12 | 21117617 | 21276033 + | NM_001135192 | Asap2     | 22731  | 21140348 | 21140548 |
| 12 | 21117617 | 21276033 + | NM_001135192 | Asap2     | 11969  | 21129586 | 21129786 |
| 12 | 21396190 | 21423298 - | NM_011739    | Ywhaq     | 8104   | 21414994 | 21415194 |
| 12 | 25516464 | 25645165 + | NM_001083341 | Mboat2    | 60963  | 25577427 | 25577627 |
| 12 | 25516464 | 25645165 + | NM_001083341 | Mboat2    | -8493  | 25507771 | 25507971 |
| 12 | 25516464 | 25645165 + | NM_001083341 | Mboat2    | 58144  | 25574608 | 25574808 |
| 12 | 25516464 | 25645165 + | NM_026037    | Mboat2    | 60963  | 25577427 | 25577627 |
| 12 | 25516464 | 25645165 + | NM_026037    | Mboat2    | -8493  | 25507771 | 25507971 |
| 12 | 25516464 | 25645165 + | NM_026037    | Mboat2    | 58144  | 25574608 | 25574808 |
| 12 | 25659797 | 25744563 + | NM_001081378 | Kidins220 | 35652  | 25695449 | 25695649 |

|    |          |            |              |               |        |          |          |
|----|----------|------------|--------------|---------------|--------|----------|----------|
| 12 | 27154080 | 27164703 + | NM_020557    | Cmpk2         | 7984   | 27162064 | 27162264 |
| 12 | 29122660 | 29233203 - | NM_001177964 | Dcdc2c        | 78095  | 29154908 | 29155108 |
| 12 | 29122660 | 29233203 - | NM_001177964 | Dcdc2c        | 14577  | 29218426 | 29218626 |
| 12 | 29375493 | 29435260 - | NM_001161410 | Trappc12      | -997   | 29436257 | 29436457 |
| 12 | 29375493 | 29435319 - | NM_178811    | Trappc12      | -938   | 29436257 | 29436457 |
| 12 | 29394372 | 29435319 - | NM_001161411 | Trappc12      | -938   | 29436257 | 29436457 |
| 12 | 29436693 | 29552357 + | NM_201357    | Tssc1         | 53417  | 29490110 | 29490310 |
| 12 | 29436693 | 29552357 + | NM_201357    | Tssc1         | -236   | 29436257 | 29436457 |
| 12 | 30213249 | 30608075 + | NM_001093775 | Myt1l         | 270660 | 30483909 | 30484109 |
| 12 | 30213249 | 30608075 + | NM_001093778 | Myt1l         | 270660 | 30483909 | 30484109 |
| 12 | 30213249 | 30608075 + | NM_008666    | Myt1l         | 270660 | 30483909 | 30484109 |
| 12 | 30219770 | 30608075 + | NM_001093776 | Myt1l         | 264139 | 30483909 | 30484109 |
| 12 | 32123084 | 32158785 + | NM_021353    | Slc26a3       | 25029  | 32148113 | 32148313 |
| 12 | 32123084 | 32158785 + | NM_021353    | Slc26a3       | 18122  | 32141206 | 32141406 |
| 12 | 32123084 | 32158785 + | NM_021353    | Slc26a3       | 23153  | 32146237 | 32146437 |
| 12 | 32123084 | 32158785 + | NM_021353    | Slc26a3       | -186   | 32122698 | 32122898 |
| 12 | 32169694 | 32184482 - | NM_001253847 | Cbll1         | 12196  | 32172086 | 32172286 |
| 12 | 32169694 | 32184482 - | NM_001253848 | Cbll1         | 12196  | 32172086 | 32172286 |
| 12 | 32169694 | 32184482 - | NM_134048    | Cbll1         | 12196  | 32172086 | 32172286 |
| 12 | 32204684 | 32244835 - | NM_011867    | Slc26a4       | 5294   | 32239341 | 32239541 |
| 12 | 32339734 | 32622496 + | NM_001163126 | Cog5          | 205297 | 32545031 | 32545231 |
| 12 | 32339734 | 32622496 + | NM_001163126 | Cog5          | 227899 | 32567633 | 32567833 |
| 12 | 32339734 | 32622496 + | NM_001163126 | Cog5          | 38456  | 32378190 | 32378390 |
| 12 | 33604249 | 33638655 - | NR_044986    | 4933406C10Rik | 9283   | 33629172 | 33629372 |
| 12 | 33638810 | 33664368 + | NM_013635    | Sypl          | -9438  | 33629172 | 33629372 |
| 12 | 33639051 | 33664368 + | NM_198710    | Sypl          | -9679  | 33629172 | 33629372 |
| 12 | 33718661 | 33777741 - | NM_001024478 | Cdhr3         | 458    | 33777083 | 33777283 |
| 12 | 33796576 | 33832452 - | NR_015602    | F730043M19Rik | -5751  | 33838203 | 33838403 |
| 12 | 33832551 | 33936023 + | NM_028139    | Atxn7l1       | 5652   | 33838203 | 33838403 |
| 12 | 33987380 | 34053143 + | NM_001033436 | Atxn7l1       | 39150  | 34026530 | 34026730 |

|    |          |            |              |         |        |          |          |
|----|----------|------------|--------------|---------|--------|----------|----------|
| 12 | 34114489 | 34124246 + | NM_172253    | Twistnb | -21    | 34114268 | 34114468 |
| 12 | 36182651 | 36219662 - | NM_013464    | Ahr     | 7304   | 36212158 | 36212358 |
| 12 | 36719512 | 36730669 + | NM_011783    | Agr2    | 738    | 36720250 | 36720450 |
| 12 | 36818422 | 36883413 - | NM_025840    | Bzw2    | 860    | 36882353 | 36882553 |
| 12 | 36818422 | 36883413 - | NM_025840    | Bzw2    | -8529  | 36891942 | 36892142 |
| 12 | 36818422 | 36883413 - | NM_025840    | Bzw2    | 22939  | 36860274 | 36860474 |
| 12 | 36883711 | 36923879 + | NM_146033    | Ankmy2  | -1158  | 36882353 | 36882553 |
| 12 | 36883711 | 36923879 + | NM_146033    | Ankmy2  | 8231   | 36891942 | 36892142 |
| 12 | 36934932 | 36944790 - | NM_027699    | Lrrc72  | -8648  | 36953438 | 36953638 |
| 12 | 36936150 | 36979986 - | NM_001177877 | Lrrc72  | 26348  | 36953438 | 36953638 |
| 12 | 37108037 | 37416091 + | NM_001289502 | Ispd    | 143533 | 37251570 | 37251770 |
| 12 | 37108037 | 37416091 + | NM_001289502 | Ispd    | 142217 | 37250254 | 37250454 |
| 12 | 37108037 | 37416091 + | NM_178629    | Ispd    | 143533 | 37251570 | 37251770 |
| 12 | 37108037 | 37416091 + | NM_178629    | Ispd    | 142217 | 37250254 | 37250454 |
| 12 | 37108734 | 37416091 + | NM_001289503 | Ispd    | 142836 | 37251570 | 37251770 |
| 12 | 37108734 | 37416091 + | NM_001289503 | Ispd    | 141520 | 37250254 | 37250454 |
| 12 | 37968226 | 38308520 + | NM_178767    | Agmo    | 54194  | 38022420 | 38022620 |
| 12 | 40759878 | 40764575 - | NM_001039515 | Arl4a   | 742    | 40763633 | 40763833 |
| 12 | 40759878 | 40763964 - | NM_007487    | Arl4a   | 131    | 40763633 | 40763833 |
| 12 | 40786358 | 40860816 - | NM_001146196 | Scin    | -4865  | 40865681 | 40865881 |
| 12 | 40786358 | 40860816 - | NM_001146196 | Scin    | -5662  | 40866478 | 40866678 |
| 12 | 40786358 | 40860816 - | NM_001146196 | Scin    | 36775  | 40823841 | 40824041 |
| 12 | 40786358 | 40860816 - | NM_001146196 | Scin    | 27104  | 40833512 | 40833712 |
| 12 | 40786358 | 40860816 - | NM_001146196 | Scin    | 38322  | 40822294 | 40822494 |
| 12 | 40786358 | 40860816 - | NM_009132    | Scin    | -4865  | 40865681 | 40865881 |
| 12 | 40786358 | 40860816 - | NM_009132    | Scin    | -5662  | 40866478 | 40866678 |
| 12 | 40786358 | 40860816 - | NM_009132    | Scin    | 36775  | 40823841 | 40824041 |
| 12 | 40786358 | 40860816 - | NM_009132    | Scin    | 27104  | 40833512 | 40833712 |
| 12 | 40786358 | 40860816 - | NM_009132    | Scin    | 38322  | 40822294 | 40822494 |
| 12 | 41041633 | 41172378 - | NM_172575    | Zfp277  | 110855 | 41061323 | 41061523 |

|    |          |            |              |               |        |          |          |
|----|----------|------------|--------------|---------------|--------|----------|----------|
| 12 | 41041633 | 41172378 - | NM_178845    | Zfp277        | 110855 | 41061323 | 41061523 |
| 12 | 41172640 | 41573076 + | NM_172803    | Dock4         | 396718 | 41569358 | 41569558 |
| 12 | 41750677 | 43056576 + | NM_053122    | Immp2l        | 462981 | 42213658 | 42213858 |
| 12 | 41750677 | 43056576 + | NM_053122    | Immp2l        | 77101  | 41827778 | 41827978 |
| 12 | 41750677 | 43056576 + | NM_053122    | Immp2l        | 23225  | 41773902 | 41774102 |
| 12 | 42178255 | 42212645 - | NM_001271708 | Lrrn3         | -1013  | 42213658 | 42213858 |
| 12 | 42178255 | 42212645 - | NM_001271709 | Lrrn3         | -1013  | 42213658 | 42213858 |
| 12 | 42178255 | 42212645 - | NM_010733    | Lrrn3         | -1013  | 42213658 | 42213858 |
| 12 | 45953473 | 46175471 - | NM_144552    | Stxbp6        | 147023 | 46028248 | 46028448 |
| 12 | 45953473 | 46175471 - | NM_144552    | Stxbp6        | 135643 | 46039628 | 46039828 |
| 12 | 45953473 | 46175471 - | NM_144552    | Stxbp6        | 151942 | 46023329 | 46023529 |
| 12 | 52478500 | 52551090 + | NM_029825    | Scfd1         | 43632  | 52522132 | 52522332 |
| 12 | 52709528 | 52792902 - | NM_001172098 | Strn3         | 49761  | 52742941 | 52743141 |
| 12 | 52709528 | 52792902 - | NM_052973    | Strn3         | 49761  | 52742941 | 52743141 |
| 12 | 52791953 | 52839927 + | NM_021710    | Ap4s1         | 44490  | 52836443 | 52836643 |
| 12 | 52844709 | 52930524 - | NM_144788    | Hectd1        | 11269  | 52919055 | 52919255 |
| 12 | 52976860 | 53072309 - | NM_177171    | Heatr5a       | -4234  | 53076543 | 53076743 |
| 12 | 53198733 | 53411947 + | NM_029760    | Nubpl         | 54424  | 53253157 | 53253357 |
| 12 | 53198733 | 53411947 + | NM_029760    | Nubpl         | 208317 | 53407050 | 53407250 |
| 12 | 53617064 | 53668839 + | NM_009706    | Arhgap5       | 39203  | 53656267 | 53656467 |
| 12 | 53700971 | 53703310 - | NR_045910    | 1700031P21Rik | 1540   | 53701570 | 53701770 |
| 12 | 53700971 | 53703310 - | NR_045910    | 1700031P21Rik | -2041  | 53705351 | 53705551 |
| 12 | 53800370 | 54252003 + | NM_198111    | Akap6         | 3085   | 53803455 | 53803655 |
| 12 | 54349664 | 55173163 + | NM_013780    | Npas3         | 702695 | 55052359 | 55052559 |
| 12 | 55279968 | 55304862 - | NM_028133    | Egln3         | 15720  | 55288942 | 55289142 |
| 12 | 55279968 | 55304862 - | NM_028133    | Egln3         | 12779  | 55291883 | 55292083 |
| 12 | 55746920 | 55747000 - | NR_035439    | Mir1892       | 2182   | 55744618 | 55744818 |
| 12 | 55847344 | 55896650 - | NM_026998    | Snx6          | 10084  | 55886366 | 55886566 |
| 12 | 55847344 | 55896650 - | NM_026998    | Snx6          | 11969  | 55884481 | 55884681 |
| 12 | 55993976 | 56087324 - | NM_013815    | Baz1a         | 79184  | 56007940 | 56008140 |

|    |          |            |              |               |        |          |          |
|----|----------|------------|--------------|---------------|--------|----------|----------|
| 12 | 56403624 | 56483479 + | NM_025373    | 1110008L16Rik | 26328  | 56429952 | 56430152 |
| 12 | 56403624 | 56483479 + | NM_025373    | 1110008L16Rik | 10934  | 56414558 | 56414758 |
| 12 | 56666192 | 56667884 + | NM_001277340 | Aldoart2      | -4574  | 56661418 | 56661618 |
| 12 | 56703877 | 56922504 - | NM_001003719 | Ralgapa1      | 100964 | 56821340 | 56821540 |
| 12 | 56703877 | 56922504 - | NM_001003719 | Ralgapa1      | 52045  | 56870259 | 56870459 |
| 12 | 56703877 | 56922504 - | NM_001003719 | Ralgapa1      | 214233 | 56708071 | 56708271 |
| 12 | 56703877 | 56922504 - | NM_001112714 | Ralgapa1      | 100964 | 56821340 | 56821540 |
| 12 | 56703877 | 56922504 - | NM_001112714 | Ralgapa1      | 52045  | 56870259 | 56870459 |
| 12 | 56703877 | 56922504 - | NM_001112714 | Ralgapa1      | 214233 | 56708071 | 56708271 |
| 12 | 56703877 | 56922504 - | NM_001286263 | Ralgapa1      | 100964 | 56821340 | 56821540 |
| 12 | 56703877 | 56922504 - | NM_001286263 | Ralgapa1      | 52045  | 56870259 | 56870459 |
| 12 | 56703877 | 56922504 - | NM_001286263 | Ralgapa1      | 214233 | 56708071 | 56708271 |
| 12 | 56703877 | 56922504 - | NM_019994    | Ralgapa1      | 100964 | 56821340 | 56821540 |
| 12 | 56703877 | 56922504 - | NM_019994    | Ralgapa1      | 52045  | 56870259 | 56870459 |
| 12 | 56703877 | 56922504 - | NM_019994    | Ralgapa1      | 214233 | 56708071 | 56708271 |
| 12 | 56937353 | 56970723 + | NM_001037756 | Brms1l        | -234   | 56936919 | 56937119 |
| 12 | 57813621 | 58298460 - | NM_172577    | Slc25a21      | 10304  | 58287956 | 58288156 |
| 12 | 58331412 | 58558229 + | NM_001164370 | Mipol1        | 12503  | 58343915 | 58344115 |
| 12 | 58641619 | 58647109 - | NM_008259    | Foxa1         | -704   | 58647813 | 58648013 |
| 12 | 58686962 | 58719590 - | NR_131110    | 4921518K17Rik | 32463  | 58686927 | 58687127 |
| 12 | 60144079 | 60162460 - | NM_001306217 | Trappc6b      | -4414  | 60166874 | 60167074 |
| 12 | 60144079 | 60162460 - | NM_001306217 | Trappc6b      | -4898  | 60167358 | 60167558 |
| 12 | 60144079 | 60162460 - | NM_001306218 | Trappc6b      | -4414  | 60166874 | 60167074 |
| 12 | 60144079 | 60162460 - | NM_001306218 | Trappc6b      | -4898  | 60167358 | 60167558 |
| 12 | 60144079 | 60162460 - | NM_030057    | Trappc6b      | -4414  | 60166874 | 60167074 |
| 12 | 60144079 | 60162460 - | NM_030057    | Trappc6b      | -4898  | 60167358 | 60167558 |
| 12 | 60167906 | 60175005 + | NM_008891    | Pnn           | -832   | 60166874 | 60167074 |
| 12 | 60167906 | 60175005 + | NM_008891    | Pnn           | -348   | 60167358 | 60167558 |
| 12 | 60196787 | 60210118 + | NM_177321    | Mia2          | 9091   | 60205878 | 60206078 |
| 12 | 60196787 | 60210118 + | NM_177321    | Mia2          | 10633  | 60207420 | 60207620 |

|    |          |            |              |               |        |          |          |
|----|----------|------------|--------------|---------------|--------|----------|----------|
| 12 | 60230733 | 60291208 + | NM_001165254 | Ctage5        | 13699  | 60244432 | 60244632 |
| 12 | 60230733 | 60291208 + | NM_146034    | Ctage5        | 13699  | 60244432 | 60244632 |
| 12 | 60232440 | 60291208 + | NM_001165253 | Ctage5        | 11992  | 60244432 | 60244632 |
| 12 | 60301642 | 60320471 - | NM_001033156 | Fbxo33        | 11270  | 60309001 | 60309201 |
| 12 | 67567046 | 68323537 - | NM_001193266 | Mdga2         | 162963 | 68160374 | 68160574 |
| 12 | 67567046 | 68323537 - | NM_207010    | Mdga2         | 162963 | 68160374 | 68160574 |
| 12 | 70283721 | 70285055 - | NM_025589    | Rpl36al       | -1457  | 70286512 | 70286712 |
| 12 | 70285145 | 70287761 + | NM_146035    | Mgat2         | 1367   | 70286512 | 70286712 |
| 12 | 70684748 | 70782840 - | NM_001135559 | Sos2          | 27636  | 70755004 | 70755204 |
| 12 | 70684748 | 70782840 - | NM_001135559 | Sos2          | 32249  | 70750391 | 70750591 |
| 12 | 70684748 | 70782840 - | NM_001135559 | Sos2          | 62997  | 70719643 | 70719843 |
| 12 | 70791423 | 70825862 - | NM_145443    | L2hgdh        | 19517  | 70806145 | 70806345 |
| 12 | 70847835 | 70891695 - | NM_183294    | Cdkl1         | 8167   | 70883328 | 70883528 |
| 12 | 70847835 | 70891695 - | NM_183294    | Cdkl1         | 6790   | 70884705 | 70884905 |
| 12 | 70891331 | 70942868 + | NR_033573    | 4930512B01Rik | -7803  | 70883328 | 70883528 |
| 12 | 70891331 | 70942868 + | NR_033573    | 4930512B01Rik | -6426  | 70884705 | 70884905 |
| 12 | 72932055 | 73093364 + | NM_026102    | Daam1         | 73362  | 73005417 | 73005617 |
| 12 | 72932055 | 73093364 + | NM_026102    | Daam1         | 101801 | 73033856 | 73034056 |
| 12 | 72932055 | 73093364 + | NM_026102    | Daam1         | 8869   | 72940924 | 72941124 |
| 12 | 72932055 | 73093364 + | NM_026102    | Daam1         | 39964  | 72972019 | 72972219 |
| 12 | 72932055 | 73093364 + | NM_172464    | Daam1         | 73362  | 73005417 | 73005617 |
| 12 | 72932055 | 73093364 + | NM_172464    | Daam1         | 101801 | 73033856 | 73034056 |
| 12 | 72932055 | 73093364 + | NM_172464    | Daam1         | 8869   | 72940924 | 72941124 |
| 12 | 72932055 | 73093364 + | NM_172464    | Daam1         | 39964  | 72972019 | 72972219 |
| 12 | 72990530 | 73093364 + | NM_001286452 | Daam1         | 14887  | 73005417 | 73005617 |
| 12 | 72990530 | 73093364 + | NM_001286452 | Daam1         | 43326  | 73033856 | 73034056 |
| 12 | 73862198 | 73895928 + | NM_008910    | Ppm1a         | 6653   | 73868851 | 73869051 |
| 12 | 74644101 | 74647383 - | NM_178715    | Tmem30b       | -1960  | 74649343 | 74649543 |
| 12 | 74649470 | 74652974 + | NR_044985    | 2210039B01Rik | 0      | 74649343 | 74649543 |
| 12 | 74686028 | 74879172 + | NM_008856    | Prkch         | 155522 | 74841550 | 74841750 |

|    |          |            |              |           |        |          |          |
|----|----------|------------|--------------|-----------|--------|----------|----------|
| 12 | 74686028 | 74879172 + | NM_008856    | Prkch     | 107381 | 74793409 | 74793609 |
| 12 | 75008854 | 75048518 + | NM_010431    | Hif1a     | -3412  | 75005242 | 75005442 |
| 12 | 75098748 | 75368904 + | NM_172804    | Syt16     | 252892 | 75351640 | 75351840 |
| 12 | 75098748 | 75368904 + | NM_172804    | Syt16     | 108464 | 75207212 | 75207412 |
| 12 | 76409300 | 76502443 + | NM_023275    | Rhoj      | 12354  | 76421654 | 76421854 |
| 12 | 76731581 | 76770525 - | NM_028203    | Wdr89     | 36559  | 76733766 | 76733966 |
| 12 | 76731912 | 76732737 - | NR_038063    | Rplp2-ps1 | -1029  | 76733766 | 76733966 |
| 12 | 76919305 | 77211916 + | NM_001005510 | Syne2     | 20889  | 76940194 | 76940394 |
| 12 | 76919305 | 77211916 + | NM_001005510 | Syne2     | 265595 | 77184900 | 77185100 |
| 12 | 76919305 | 77211916 + | NM_001005510 | Syne2     | 275715 | 77195020 | 77195220 |
| 12 | 76919305 | 77211916 + | NM_001005510 | Syne2     | 231122 | 77150427 | 77150627 |
| 12 | 76919305 | 77211916 + | NM_001005510 | Syne2     | 263222 | 77182527 | 77182727 |
| 12 | 76919305 | 77211916 + | NM_001005510 | Syne2     | 48569  | 76967874 | 76968074 |
| 12 | 76919305 | 77211916 + | NM_001005510 | Syne2     | 36761  | 76956066 | 76956266 |
| 12 | 77425878 | 77435139 + | NM_001101471 | Akap5     | 5147   | 77431025 | 77431225 |
| 12 | 77449887 | 77470452 - | NM_001172104 | Zbtb25    | 503    | 77469749 | 77469949 |
| 12 | 77449887 | 77470548 - | NM_028356    | Zbtb25    | 599    | 77469749 | 77469949 |
| 12 | 77471253 | 77489735 + | NM_178744    | Zbtb1     | -1304  | 77469749 | 77469949 |
| 12 | 77634121 | 77634200 - | NR_039597    | Mir5135   | 0      | 77634023 | 77634223 |
| 12 | 77634121 | 77634200 - | NR_039597    | Mir5135   | 1776   | 77632224 | 77632424 |
| 12 | 77634547 | 77680027 + | NM_153804    | Plekhg3   | -9661  | 77624686 | 77624886 |
| 12 | 77634547 | 77680027 + | NM_153804    | Plekhg3   | -324   | 77634023 | 77634223 |
| 12 | 77634547 | 77680027 + | NM_153804    | Plekhg3   | -2123  | 77632224 | 77632424 |
| 12 | 77866560 | 77884166 + | NM_206534    | Churc1    | 629    | 77867189 | 77867389 |
| 12 | 77893322 | 77896542 - | NM_030677    | Gpx2      | -2483  | 77899025 | 77899225 |
| 12 | 77893322 | 77896542 - | NM_030677    | Gpx2      | -1739  | 77898281 | 77898481 |
| 12 | 77898950 | 77923512 - | NM_134050    | Rab15     | 24287  | 77899025 | 77899225 |
| 12 | 77938454 | 78022400 + | NM_145927    | Fntb      | 71833  | 78010287 | 78010487 |
| 12 | 78038256 | 78063236 - | NM_001146176 | Max       | -514   | 78063750 | 78063950 |
| 12 | 78038256 | 78063236 - | NM_008558    | Max       | -514   | 78063750 | 78063950 |

|    |          |            |              |          |        |          |          |
|----|----------|------------|--------------|----------|--------|----------|----------|
| 12 | 78339091 | 78576984 + | NM_001252614 | Fut8     | 183339 | 78522430 | 78522630 |
| 12 | 78339091 | 78576984 + | NM_001252614 | Fut8     | 157273 | 78496364 | 78496564 |
| 12 | 78339091 | 78576984 + | NM_016893    | Fut8     | 183339 | 78522430 | 78522630 |
| 12 | 78339091 | 78576984 + | NM_016893    | Fut8     | 157273 | 78496364 | 78496564 |
| 12 | 78339726 | 78576984 + | NR_045554    | Fut8     | 182704 | 78522430 | 78522630 |
| 12 | 78339726 | 78576984 + | NR_045554    | Fut8     | 156638 | 78496364 | 78496564 |
| 12 | 78489851 | 78576984 + | NM_001252615 | Fut8     | 32579  | 78522430 | 78522630 |
| 12 | 78489851 | 78576984 + | NM_001252615 | Fut8     | 6513   | 78496364 | 78496564 |
| 12 | 78511128 | 78576984 + | NM_001252616 | Fut8     | 11302  | 78522430 | 78522630 |
| 12 | 79327642 | 79785757 + | NM_145965    | Gphn     | 96750  | 79424392 | 79424592 |
| 12 | 79327642 | 79785757 + | NM_172952    | Gphn     | 96750  | 79424392 | 79424592 |
| 12 | 79792522 | 79835507 + | NM_027597    | Fam71d   | -390   | 79791932 | 79792132 |
| 12 | 79792522 | 79835507 + | NM_029069    | Fam71d   | -390   | 79791932 | 79792132 |
| 12 | 79849934 | 79941701 + | NM_019579    | Mpp5     | 20202  | 79870136 | 79870336 |
| 12 | 79989684 | 80007926 - | NM_013738    | Plek2    | -3835  | 80011761 | 80011961 |
| 12 | 79989684 | 80007926 - | NM_013738    | Plek2    | -7549  | 80015475 | 80015675 |
| 12 | 80062782 | 80084466 - | NM_001170401 | Tmem229b | 5581   | 80078685 | 80078885 |
| 12 | 80062782 | 80108265 - | NM_178745    | Tmem229b | 29380  | 80078685 | 80078885 |
| 12 | 80130150 | 80182643 + | NM_181073    | Plekhh1  | 11269  | 80141419 | 80141619 |
| 12 | 80130150 | 80182643 + | NM_181073    | Plekhh1  | 26267  | 80156417 | 80156617 |
| 12 | 80130150 | 80182643 + | NM_181073    | Plekhh1  | 12242  | 80142392 | 80142592 |
| 12 | 80130150 | 80182643 + | NM_181073    | Plekhh1  | -5955  | 80123995 | 80124195 |
| 12 | 80231775 | 80257289 + | NM_009705    | Arg2     | 17596  | 80249371 | 80249571 |
| 12 | 80231775 | 80257289 + | NM_009705    | Arg2     | 18922  | 80250697 | 80250897 |
| 12 | 80231775 | 80257289 + | NM_009705    | Arg2     | 1142   | 80232917 | 80233117 |
| 12 | 80276538 | 80292807 - | NM_021557    | Rdh11    | 605    | 80292002 | 80292202 |
| 12 | 80309901 | 80323649 + | NM_030017    | Rdh12    | 2680   | 80312581 | 80312781 |
| 12 | 80398269 | 80915678 + | NM_009014    | Rad51b   | 204670 | 80602939 | 80603139 |
| 12 | 80398269 | 80915678 + | NM_009014    | Rad51b   | 465423 | 80863692 | 80863892 |
| 12 | 80398269 | 80915678 + | NM_009014    | Rad51b   | 485488 | 80883757 | 80883957 |



|    |          |            |              |               |        |          |          |
|----|----------|------------|--------------|---------------|--------|----------|----------|
| 12 | 80398269 | 80915678 + | NM_009014    | Rad51b        | 238354 | 80636623 | 80636823 |
| 12 | 80398269 | 80915678 + | NM_009014    | Rad51b        | 379748 | 80778017 | 80778217 |
| 12 | 80398269 | 80915678 + | NM_009014    | Rad51b        | 234814 | 80633083 | 80633283 |
| 12 | 80398269 | 80915678 + | NM_009014    | Rad51b        | 228712 | 80626981 | 80627181 |
| 12 | 80398269 | 80915678 + | NM_009014    | Rad51b        | 20463  | 80418732 | 80418932 |
| 12 | 80398269 | 80915678 + | NM_009014    | Rad51b        | 201200 | 80599469 | 80599669 |
| 12 | 80398269 | 80915678 + | NM_009014    | Rad51b        | 202666 | 80600935 | 80601135 |
| 12 | 80398269 | 80915678 + | NM_009014    | Rad51b        | 55145  | 80453414 | 80453614 |
| 12 | 80398269 | 80915678 + | NM_009014    | Rad51b        | 19187  | 80417456 | 80417656 |
| 12 | 80398338 | 80609642 + | NM_001252562 | Rad51b        | 204601 | 80602939 | 80603139 |
| 12 | 80398338 | 80609642 + | NM_001252562 | Rad51b        | 20394  | 80418732 | 80418932 |
| 12 | 80398338 | 80609642 + | NM_001252562 | Rad51b        | 201131 | 80599469 | 80599669 |
| 12 | 80398338 | 80609642 + | NM_001252562 | Rad51b        | 202597 | 80600935 | 80601135 |
| 12 | 80398338 | 80609642 + | NM_001252562 | Rad51b        | 55076  | 80453414 | 80453614 |
| 12 | 80398338 | 80609642 + | NM_001252562 | Rad51b        | 19118  | 80417456 | 80417656 |
| 12 | 81268529 | 81361359 - | NM_134156    | Actn1         | 43563  | 81317596 | 81317796 |
| 12 | 81268529 | 81361359 - | NM_134156    | Actn1         | 91333  | 81269826 | 81270026 |
| 12 | 81793588 | 81825204 + | NM_001177503 | Plekhd1       | 27947  | 81821535 | 81821735 |
| 12 | 81891519 | 81981821 + | NM_001242419 | Susd6         | -374   | 81890945 | 81891145 |
| 12 | 81891519 | 81981821 + | NM_001242419 | Susd6         | 21632  | 81913151 | 81913351 |
| 12 | 81891519 | 81981821 + | NM_001242419 | Susd6         | -8014  | 81883305 | 81883505 |
| 12 | 81891519 | 81981821 + | NM_178682    | Susd6         | -374   | 81890945 | 81891145 |
| 12 | 81891519 | 81981821 + | NM_178682    | Susd6         | 21632  | 81913151 | 81913351 |
| 12 | 81891519 | 81981821 + | NM_178682    | Susd6         | -8014  | 81883305 | 81883505 |
| 12 | 82024419 | 82025435 - | NR_033786    | 1700052I22Rik | -5807  | 82031242 | 82031442 |
| 12 | 82024419 | 82025435 - | NR_033786    | 1700052I22Rik | -7138  | 82032573 | 82032773 |
| 12 | 82024419 | 82025435 - | NR_033786    | 1700052I22Rik | -2205  | 82027640 | 82027840 |
| 12 | 82127795 | 82287402 + | NM_001146217 | Smoc1         | 153167 | 82280962 | 82281162 |
| 12 | 82127795 | 82287402 + | NM_022316    | Smoc1         | 153167 | 82280962 | 82281162 |
| 12 | 82459840 | 82586125 - | NM_001309809 | Cox16         | 0      | 82585960 | 82586160 |

|    |          |            |              |               |        |          |          |
|----|----------|------------|--------------|---------------|--------|----------|----------|
| 12 | 82459840 | 82586125 - | NM_001309809 | Cox16         | -3363  | 82589488 | 82589688 |
| 12 | 82459840 | 82586125 - | NM_001309809 | Cox16         | 81895  | 82504030 | 82504230 |
| 12 | 82459840 | 82586125 - | NM_001309810 | Cox16         | 0      | 82585960 | 82586160 |
| 12 | 82459840 | 82586125 - | NM_001309810 | Cox16         | -3363  | 82589488 | 82589688 |
| 12 | 82459840 | 82586125 - | NM_001309810 | Cox16         | 81895  | 82504030 | 82504230 |
| 12 | 82459840 | 82633899 - | NM_001309848 | Synj2bp-cox16 | 24982  | 82608717 | 82608917 |
| 12 | 82459840 | 82633899 - | NM_001309848 | Synj2bp-cox16 | 182    | 82633517 | 82633717 |
| 12 | 82459840 | 82633899 - | NM_001309848 | Synj2bp-cox16 | 3446   | 82630253 | 82630453 |
| 12 | 82459840 | 82633899 - | NM_001309848 | Synj2bp-cox16 | 21917  | 82611782 | 82611982 |
| 12 | 82459840 | 82633899 - | NM_001309848 | Synj2bp-cox16 | 47739  | 82585960 | 82586160 |
| 12 | 82459840 | 82633899 - | NM_001309848 | Synj2bp-cox16 | 44211  | 82589488 | 82589688 |
| 12 | 82459840 | 82633899 - | NM_001309848 | Synj2bp-cox16 | 129669 | 82504030 | 82504230 |
| 12 | 82571590 | 82586125 - | NM_001309808 | Cox16         | 0      | 82585960 | 82586160 |
| 12 | 82571590 | 82586125 - | NM_001309808 | Cox16         | -3363  | 82589488 | 82589688 |
| 12 | 82571590 | 82586125 - | NM_025461    | Cox16         | 0      | 82585960 | 82586160 |
| 12 | 82571590 | 82586125 - | NM_025461    | Cox16         | -3363  | 82589488 | 82589688 |
| 12 | 82571590 | 82585839 - | NR_132134    | Cox16         | -121   | 82585960 | 82586160 |
| 12 | 82571590 | 82585839 - | NR_132134    | Cox16         | -3649  | 82589488 | 82589688 |
| 12 | 82571590 | 82585839 - | NR_132135    | Cox16         | -121   | 82585960 | 82586160 |
| 12 | 82571590 | 82585839 - | NR_132135    | Cox16         | -3649  | 82589488 | 82589688 |
| 12 | 82571590 | 82633899 - | NM_001309847 | Synj2bp-cox16 | 24982  | 82608717 | 82608917 |
| 12 | 82571590 | 82633899 - | NM_001309847 | Synj2bp-cox16 | 182    | 82633517 | 82633717 |
| 12 | 82571590 | 82633899 - | NM_001309847 | Synj2bp-cox16 | 3446   | 82630253 | 82630453 |
| 12 | 82571590 | 82633899 - | NM_001309847 | Synj2bp-cox16 | 21917  | 82611782 | 82611982 |
| 12 | 82571590 | 82633899 - | NM_001309847 | Synj2bp-cox16 | 47739  | 82585960 | 82586160 |
| 12 | 82571590 | 82633899 - | NM_001309847 | Synj2bp-cox16 | 44211  | 82589488 | 82589688 |
| 12 | 82593181 | 82633899 - | NM_025292    | Synj2bp       | 24982  | 82608717 | 82608917 |
| 12 | 82593181 | 82633899 - | NM_025292    | Synj2bp       | 182    | 82633517 | 82633717 |
| 12 | 82593181 | 82633899 - | NM_025292    | Synj2bp       | 3446   | 82630253 | 82630453 |
| 12 | 82593181 | 82633899 - | NM_025292    | Synj2bp       | 21917  | 82611782 | 82611982 |

|    |          |            |              |         |        |          |          |
|----|----------|------------|--------------|---------|--------|----------|----------|
| 12 | 82593181 | 82633899 - | NR_132136    | Synj2bp | 24982  | 82608717 | 82608917 |
| 12 | 82593181 | 82633899 - | NR_132136    | Synj2bp | 182    | 82633517 | 82633717 |
| 12 | 82593181 | 82633899 - | NR_132136    | Synj2bp | 3446   | 82630253 | 82630453 |
| 12 | 82593181 | 82633899 - | NR_132136    | Synj2bp | 21917  | 82611782 | 82611982 |
| 12 | 82605111 | 82633899 - | NM_001309814 | Synj2bp | 24982  | 82608717 | 82608917 |
| 12 | 82605111 | 82633899 - | NM_001309814 | Synj2bp | 182    | 82633517 | 82633717 |
| 12 | 82605111 | 82633899 - | NM_001309814 | Synj2bp | 3446   | 82630253 | 82630453 |
| 12 | 82605111 | 82633899 - | NM_001309814 | Synj2bp | 21917  | 82611782 | 82611982 |
| 12 | 82605111 | 82633899 - | NR_132142    | Synj2bp | 24982  | 82608717 | 82608917 |
| 12 | 82605111 | 82633899 - | NR_132142    | Synj2bp | 182    | 82633517 | 82633717 |
| 12 | 82605111 | 82633899 - | NR_132142    | Synj2bp | 3446   | 82630253 | 82630453 |
| 12 | 82605111 | 82633899 - | NR_132142    | Synj2bp | 21917  | 82611782 | 82611982 |
| 12 | 82732356 | 82765929 + | NM_001033149 | Ttc9    | -4115  | 82728041 | 82728241 |
| 12 | 82961017 | 83101912 + | NM_018814    | Pcnx    | 73613  | 83034630 | 83034830 |
| 12 | 83271003 | 83552772 + | NM_001167983 | Sipa1l1 | -3552  | 83267251 | 83267451 |
| 12 | 83718025 | 84259800 + | NM_001310478 | Rgs6    | 384569 | 84102594 | 84102794 |
| 12 | 83718025 | 84259800 + | NM_015812    | Rgs6    | 384569 | 84102594 | 84102794 |
| 12 | 83718486 | 84259801 + | NM_001282061 | Rgs6    | 384108 | 84102594 | 84102794 |
| 12 | 84314738 | 84828687 - | NM_001267625 | Dpf3    | 57164  | 84771323 | 84771523 |
| 12 | 84314738 | 84828687 - | NM_001267625 | Dpf3    | 100060 | 84728427 | 84728627 |
| 12 | 84314738 | 84828687 - | NM_001267625 | Dpf3    | 80407  | 84748080 | 84748280 |
| 12 | 84369998 | 84828687 - | NM_001267626 | Dpf3    | 57164  | 84771323 | 84771523 |
| 12 | 84369998 | 84828687 - | NM_001267626 | Dpf3    | 100060 | 84728427 | 84728627 |
| 12 | 84369998 | 84828687 - | NM_001267626 | Dpf3    | 80407  | 84748080 | 84748280 |
| 12 | 84369998 | 84828687 - | NM_058212    | Dpf3    | 57164  | 84771323 | 84771523 |
| 12 | 84369998 | 84828687 - | NM_058212    | Dpf3    | 100060 | 84728427 | 84728627 |
| 12 | 84369998 | 84828687 - | NM_058212    | Dpf3    | 80407  | 84748080 | 84748280 |
| 12 | 84887891 | 84938098 - | NM_183154    | Zfyve1  | 538    | 84937360 | 84937560 |
| 12 | 84887891 | 84938098 - | NM_183154    | Zfyve1  | 16465  | 84921433 | 84921633 |
| 12 | 84887891 | 84938098 - | NM_183154    | Zfyve1  | 17709  | 84920189 | 84920389 |

|    |          |            |              |         |       |          |          |
|----|----------|------------|--------------|---------|-------|----------|----------|
| 12 | 84973184 | 85024074 + | NM_027349    | Rbm25   | 9687  | 84982871 | 84983071 |
| 12 | 85134984 | 85183309 - | NM_001136075 | Numb    | -364  | 85183673 | 85183873 |
| 12 | 85134984 | 85183309 - | NM_001272055 | Numb    | -364  | 85183673 | 85183873 |
| 12 | 85134984 | 85217763 - | NM_001272056 | Numb    | 33890 | 85183673 | 85183873 |
| 12 | 85134984 | 85183309 - | NM_010949    | Numb    | -364  | 85183673 | 85183873 |
| 12 | 85134984 | 85262885 - | NR_073563    | Numb    | 79012 | 85183673 | 85183873 |
| 12 | 85134984 | 85262885 - | NR_073563    | Numb    | -3318 | 85266203 | 85266403 |
| 12 | 85134984 | 85262885 - | NR_073563    | Numb    | -286  | 85263171 | 85263371 |
| 12 | 85134984 | 85262885 - | NR_073563    | Numb    | 21210 | 85241475 | 85241675 |
| 12 | 85134984 | 85262885 - | NR_073564    | Numb    | 79012 | 85183673 | 85183873 |
| 12 | 85134984 | 85262885 - | NR_073564    | Numb    | -3318 | 85266203 | 85266403 |
| 12 | 85134984 | 85262885 - | NR_073564    | Numb    | -286  | 85263171 | 85263371 |
| 12 | 85134984 | 85262885 - | NR_073564    | Numb    | 21210 | 85241475 | 85241675 |
| 12 | 85379329 | 85385674 + | NM_134247    | Acot4   | -4581 | 85374548 | 85374748 |
| 12 | 85379329 | 85385674 + | NM_134247    | Acot4   | 651   | 85379980 | 85380180 |
| 12 | 85379329 | 85385674 + | NM_134247    | Acot4   | -5302 | 85373827 | 85374027 |
| 12 | 85487081 | 85489440 - | NM_027438    | Pnma1   | -6870 | 85496310 | 85496510 |
| 12 | 85490123 | 85559832 - | NM_001163501 | Elmsan1 | 38136 | 85521496 | 85521696 |
| 12 | 85490123 | 85559832 - | NM_001163501 | Elmsan1 | -6757 | 85566589 | 85566789 |
| 12 | 85490123 | 85559832 - | NM_001163501 | Elmsan1 | -2374 | 85562206 | 85562406 |
| 12 | 85490123 | 85559832 - | NM_001163501 | Elmsan1 | 63322 | 85496310 | 85496510 |
| 12 | 85490123 | 85559832 - | NM_001163501 | Elmsan1 | 43159 | 85516473 | 85516673 |
| 12 | 85490123 | 85534966 - | NM_001163502 | Elmsan1 | 13270 | 85521496 | 85521696 |
| 12 | 85490123 | 85534966 - | NM_001163502 | Elmsan1 | 38456 | 85496310 | 85496510 |
| 12 | 85490123 | 85534966 - | NM_001163502 | Elmsan1 | 18293 | 85516473 | 85516673 |
| 12 | 85792458 | 85872484 + | NM_173756    | Lin52   | 31709 | 85824167 | 85824367 |
| 12 | 85792458 | 85872484 + | NM_173756    | Lin52   | 36082 | 85828540 | 85828740 |
| 12 | 86095509 | 86114063 - | NM_023409    | Npc2    | 0     | 86114008 | 86114208 |
| 12 | 86095509 | 86114063 - | NM_023409    | Npc2    | -4868 | 86118931 | 86119131 |
| 12 | 86114220 | 86116040 + | NM_028863    | Isca2   | -12   | 86114008 | 86114208 |

|    |          |            |              |        |        |          |          |
|----|----------|------------|--------------|--------|--------|----------|----------|
| 12 | 86337271 | 86411466 + | NM_178363    | Ylpm1  | 8042   | 86345313 | 86345513 |
| 12 | 86681564 | 86715668 - | NM_026775    | Tmed10 | -5784  | 86721452 | 86721652 |
| 12 | 86814851 | 86818220 + | NM_010234    | Fos    | -1365  | 86813286 | 86813486 |
| 12 | 86940055 | 86980829 + | NM_001205052 | Jdp2   | 21483  | 86961538 | 86961738 |
| 12 | 86940055 | 86980829 + | NM_001205052 | Jdp2   | 19024  | 86959079 | 86959279 |
| 12 | 86940366 | 86980829 + | NM_030887    | Jdp2   | 21172  | 86961538 | 86961738 |
| 12 | 86940366 | 86980829 + | NM_030887    | Jdp2   | 18713  | 86959079 | 86959279 |
| 12 | 86940968 | 86980829 + | NM_001205053 | Jdp2   | 20570  | 86961538 | 86961738 |
| 12 | 86940968 | 86980829 + | NM_001205053 | Jdp2   | 18111  | 86959079 | 86959279 |
| 12 | 87087489 | 87154536 + | NM_145447    | Mfsd7c | 63284  | 87150773 | 87150973 |
| 12 | 87087489 | 87154536 + | NM_145447    | Mfsd7c | 8388   | 87095877 | 87096077 |
| 12 | 87165900 | 87394711 + | NM_001081423 | Ttll5  | 146757 | 87312657 | 87312857 |
| 12 | 87423511 | 87503410 + | NM_001199843 | Ift43  | 11623  | 87435134 | 87435334 |
| 12 | 87423511 | 87503410 + | NM_001199843 | Ift43  | 20892  | 87444403 | 87444603 |
| 12 | 87423511 | 87503410 + | NM_029601    | Ift43  | 11623  | 87435134 | 87435334 |
| 12 | 87423511 | 87503410 + | NM_029601    | Ift43  | 20892  | 87444403 | 87444603 |
| 12 | 88287991 | 88306317 + | NM_001289429 | Cipc   | -1660  | 88286131 | 88286331 |
| 12 | 88287991 | 88306317 + | NM_001289430 | Cipc   | -1660  | 88286131 | 88286331 |
| 12 | 88287991 | 88306317 + | NM_001289431 | Cipc   | -1660  | 88286131 | 88286331 |
| 12 | 88288293 | 88306317 + | NM_001289432 | Cipc   | -1962  | 88286131 | 88286331 |
| 12 | 88288293 | 88306315 + | NM_173735    | Cipc   | -1962  | 88286131 | 88286331 |
| 12 | 88648839 | 88729181 - | NM_011479    | Sptlc2 | 19827  | 88709154 | 88709354 |
| 12 | 88648839 | 88729181 - | NM_011479    | Sptlc2 | 7036   | 88721945 | 88722145 |
| 12 | 88648839 | 88729181 - | NM_011479    | Sptlc2 | 15133  | 88713848 | 88714048 |
| 12 | 88769028 | 88784790 - | NM_001102565 | Alkbh1 | -5635  | 88790425 | 88790625 |
| 12 | 88769028 | 88784790 - | NM_001102565 | Alkbh1 | -6749  | 88791539 | 88791739 |
| 12 | 88783798 | 88784968 - | NM_001013372 | Nrp    | -5457  | 88790425 | 88790625 |
| 12 | 88783798 | 88784968 - | NM_001013372 | Nrp    | -6571  | 88791539 | 88791739 |
| 12 | 88784846 | 88790875 + | NM_026958    | Slirp  | 5579   | 88790425 | 88790625 |
| 12 | 88790860 | 88813250 - | NM_025507    | Snw1   | 7017   | 88806033 | 88806233 |

|    |           |             |              |               |        |           |           |
|----|-----------|-------------|--------------|---------------|--------|-----------|-----------|
| 12 | 88790860  | 88813250 -  | NM_025507    | Snw1          | 21511  | 88791539  | 88791739  |
| 12 | 92236932  | 92622850 -  | NM_181815    | Cep128        | 206916 | 92415734  | 92415934  |
| 12 | 92871449  | 93024877 -  | NM_175367    | Ston2         | 92246  | 92932431  | 92932631  |
| 12 | 92871449  | 93024877 -  | NM_175367    | Ston2         | 117721 | 92906956  | 92907156  |
| 12 | 93044483  | 93087598 -  | NM_001039089 | Sel1l         | 6883   | 93080515  | 93080715  |
| 12 | 93044483  | 93087598 -  | NM_011344    | Sel1l         | 6883   | 93080515  | 93080715  |
| 12 | 99672204  | 99816151 -  | NM_029911    | Kcnk10        | 55924  | 99760027  | 99760227  |
| 12 | 99914951  | 99975616 -  | NM_001146199 | Ptpn21        | 10602  | 99964814  | 99965014  |
| 12 | 99914951  | 99975616 -  | NM_001146199 | Ptpn21        | 23246  | 99952170  | 99952370  |
| 12 | 99914951  | 99972856 -  | NM_011877    | Ptpn21        | 7842   | 99964814  | 99965014  |
| 12 | 99914951  | 99972856 -  | NM_011877    | Ptpn21        | 20486  | 99952170  | 99952370  |
| 12 | 100433304 | 100688285 - | NM_183186    | Foxn3         | 97850  | 100590235 | 100590435 |
| 12 | 100433304 | 100688285 - | NM_183186    | Foxn3         | 23547  | 100664538 | 100664738 |
| 12 | 100433304 | 100688285 - | NM_183186    | Foxn3         | 31008  | 100657077 | 100657277 |
| 12 | 100433304 | 100688285 - | NM_183186    | Foxn3         | 54764  | 100633321 | 100633521 |
| 12 | 100864263 | 100866185 - | NR_045288    | 1700064M15Rik | -5886  | 100872071 | 100872271 |
| 12 | 100955741 | 101121653 - | NM_030172    | Efcab11       | 118948 | 101002505 | 101002705 |
| 12 | 101363660 | 101397864 - | NM_001290303 | Nrde2         | 4381   | 101393283 | 101393483 |
| 12 | 101363660 | 101397864 - | NM_001290303 | Nrde2         | 16339  | 101381325 | 101381525 |
| 12 | 101363660 | 101397864 - | NM_183155    | Nrde2         | 4381   | 101393283 | 101393483 |
| 12 | 101363660 | 101397864 - | NM_183155    | Nrde2         | 16339  | 101381325 | 101381525 |
| 12 | 101426178 | 101431749 + | NR_045282    | Gm10433       | 963    | 101427141 | 101427341 |
| 12 | 101426178 | 101431749 + | NR_045282    | Gm10433       | -3848  | 101422130 | 101422330 |
| 12 | 101514819 | 101539119 + | NR_045741    | Gm10432       | 9415   | 101524234 | 101524434 |
| 12 | 101514819 | 101539119 + | NR_045741    | Gm10432       | 11284  | 101526103 | 101526303 |
| 12 | 101514819 | 101539119 + | NR_045741    | Gm10432       | 6612   | 101521431 | 101521631 |
| 12 | 101514819 | 101539119 + | NR_045741    | Gm10432       | 8883   | 101523702 | 101523902 |
| 12 | 101514819 | 101539119 + | NR_045741    | Gm10432       | -5935  | 101508684 | 101508884 |
| 12 | 101787988 | 101963239 - | NM_153587    | Rps6ka5       | 17477  | 101945562 | 101945762 |
| 12 | 102017333 | 102110821 + | NM_145448    | 9030617O03Rik | 16510  | 102033843 | 102034043 |

|    |           |             |              |               |       |           |           |
|----|-----------|-------------|--------------|---------------|-------|-----------|-----------|
| 12 | 102017333 | 102110821 + | NM_145448    | 9030617003Rik | 6392  | 102023725 | 102023925 |
| 12 | 102150910 | 102267194 - | NM_026681    | Ccdc88c       | 3256  | 102263738 | 102263938 |
| 12 | 102150910 | 102267194 - | NM_026681    | Ccdc88c       | 2556  | 102264438 | 102264638 |
| 12 | 102150910 | 102267194 - | NM_026681    | Ccdc88c       | 30109 | 102236885 | 102237085 |
| 12 | 102150910 | 102267194 - | NM_026681    | Ccdc88c       | 18570 | 102248424 | 102248624 |
| 12 | 102150910 | 102267194 - | NM_026681    | Ccdc88c       | 30942 | 102236052 | 102236252 |
| 12 | 102150910 | 102267194 - | NM_026681    | Ccdc88c       | 70235 | 102196759 | 102196959 |
| 12 | 102259883 | 102259979 - | NR_035421    | Mir1190       | -3759 | 102263738 | 102263938 |
| 12 | 102259883 | 102259979 - | NR_035421    | Mir1190       | -4459 | 102264438 | 102264638 |
| 12 | 102984775 | 103057330 - | NM_011812    | Fbln5         | 1988  | 103055142 | 103055342 |
| 12 | 102984775 | 103057330 - | NM_011812    | Fbln5         | 65554 | 102991576 | 102991776 |
| 12 | 103075582 | 103151382 - | NM_028446    | Trip11        | 8695  | 103142487 | 103142687 |
| 12 | 103707344 | 103736118 + | NM_001199004 | Golga5        | 423   | 103707767 | 103707967 |
| 12 | 103708120 | 103736118 + | NM_013747    | Golga5        | -153  | 103707767 | 103707967 |
| 12 | 103793179 | 103803238 + | NM_007693    | Chga          | -8006 | 103784973 | 103785173 |
| 12 | 103806793 | 103943080 - | NM_172584    | Itpk1         | 82733 | 103860147 | 103860347 |
| 12 | 103806793 | 103943080 - | NM_172584    | Itpk1         | 1626  | 103941254 | 103941454 |
| 12 | 103806793 | 103943080 - | NM_172584    | Itpk1         | -3352 | 103946432 | 103946632 |
| 12 | 103806793 | 103943080 - | NM_172584    | Itpk1         | 22469 | 103920411 | 103920611 |
| 12 | 103806793 | 103943080 - | NM_172584    | Itpk1         | 23598 | 103919282 | 103919482 |
| 12 | 103806793 | 103943080 - | NM_172584    | Itpk1         | 99740 | 103843140 | 103843340 |
| 12 | 103806793 | 103943080 - | NM_172584    | Itpk1         | 88069 | 103854811 | 103855011 |
| 12 | 103806793 | 103943080 - | NM_172584    | Itpk1         | 84636 | 103858244 | 103858444 |
| 12 | 103806793 | 103943080 - | NM_172584    | Itpk1         | 98936 | 103843944 | 103844144 |
| 12 | 103923138 | 103923231 - | NR_035457    | Mir1936       | 2620  | 103920411 | 103920611 |
| 12 | 104022858 | 104116617 - | NM_172806    | Btbd7         | 63075 | 104053342 | 104053542 |
| 12 | 104187069 | 104422208 + | NM_001081017 | Unc79         | 31931 | 104219000 | 104219200 |
| 12 | 104689108 | 104695434 - | NM_145449    | lfi27l2b      | -34   | 104695468 | 104695668 |
| 12 | 104770775 | 104852043 + | NM_028980    | Ppp4r4        | 65904 | 104836679 | 104836879 |
| 12 | 105316169 | 105325131 + | NR_002861    | Serpina4-ps1  | -8078 | 105307891 | 105308091 |

|    |           |             |              |           |       |           |           |
|----|-----------|-------------|--------------|-----------|-------|-----------|-----------|
| 12 | 105350934 | 105360107 + | NM_001167705 | Serpina3a | 5008  | 105355942 | 105356142 |
| 12 | 105350934 | 105360107 + | NM_028740    | Serpina3a | 5008  | 105355942 | 105356142 |
| 12 | 105385117 | 105392083 - | NM_008458    | Serpina3c | 3285  | 105388598 | 105388798 |
| 12 | 105576696 | 105583950 + | NM_011458    | Serpina3k | 6776  | 105583472 | 105583672 |
| 12 | 106001324 | 106103287 - | NM_001040682 | Clmn      | 9426  | 106093661 | 106093861 |
| 12 | 106001324 | 106103287 - | NM_001040682 | Clmn      | 34714 | 106068373 | 106068573 |
| 12 | 106001324 | 106103287 - | NM_001040682 | Clmn      | 20171 | 106082916 | 106083116 |
| 12 | 106001324 | 106103287 - | NM_053155    | Clmn      | 9426  | 106093661 | 106093861 |
| 12 | 106001324 | 106103287 - | NM_053155    | Clmn      | 34714 | 106068373 | 106068573 |
| 12 | 106001324 | 106103287 - | NM_053155    | Clmn      | 20171 | 106082916 | 106083116 |
| 12 | 106001324 | 106103287 - | NR_104435    | Clmn      | 9426  | 106093661 | 106093861 |
| 12 | 106001324 | 106103287 - | NR_104435    | Clmn      | 34714 | 106068373 | 106068573 |
| 12 | 106001324 | 106103287 - | NR_104435    | Clmn      | 20171 | 106082916 | 106083116 |
| 12 | 106001324 | 106103287 - | NR_104436    | Clmn      | 9426  | 106093661 | 106093861 |
| 12 | 106001324 | 106103287 - | NR_104436    | Clmn      | 34714 | 106068373 | 106068573 |
| 12 | 106001324 | 106103287 - | NR_104436    | Clmn      | 20171 | 106082916 | 106083116 |
| 12 | 106001324 | 106103287 - | NR_104436    | Clmn      | 9426  | 106093661 | 106093861 |
| 12 | 106001324 | 106103287 - | NR_104437    | Clmn      | 34714 | 106068373 | 106068573 |
| 12 | 106001324 | 106103287 - | NR_104437    | Clmn      | 20171 | 106082916 | 106083116 |
| 12 | 106001324 | 106103287 - | NR_104437    | Clmn      | 9426  | 106093661 | 106093861 |
| 12 | 106001324 | 106103287 - | NR_104438    | Clmn      | 34714 | 106068373 | 106068573 |
| 12 | 106001324 | 106103287 - | NR_104438    | Clmn      | 20171 | 106082916 | 106083116 |
| 12 | 106001324 | 106103287 - | NR_104438    | Clmn      | 9426  | 106093661 | 106093861 |
| 12 | 106001324 | 106103287 - | NR_104439    | Clmn      | 34714 | 106068373 | 106068573 |
| 12 | 106001324 | 106103287 - | NR_104439    | Clmn      | 20171 | 106082916 | 106083116 |
| 12 | 106168143 | 106236888 - | NM_001042699 | Syne3     | -1624 | 106238512 | 106238712 |
| 12 | 106168143 | 106248020 - | NM_172500    | Syne3     | 9308  | 106238512 | 106238712 |
| 12 | 106270899 | 106279121 + | NM_028419    | Glr5      | -4906 | 106265793 | 106265993 |
| 12 | 106851749 | 106923452 - | NM_029654    | Atg2b     | -4286 | 106927738 | 106927938 |
| 12 | 106923562 | 106941268 + | NM_178613    | Gskip     | 4176  | 106927738 | 106927938 |



|    |           |             |              |         |       |           |           |
|----|-----------|-------------|--------------|---------|-------|-----------|-----------|
| 12 | 106944192 | 107020658 + | NM_030187    | Ak7     | 52417 | 106996609 | 106996809 |
| 12 | 107022912 | 107077154 + | NM_011112    | Papola  | 45966 | 107068878 | 107069078 |
| 12 | 107022912 | 107077154 + | NM_011112    | Papola  | 26209 | 107049121 | 107049321 |
| 12 | 107022912 | 107077154 + | NM_011112    | Papola  | 40114 | 107063026 | 107063226 |
| 12 | 109148613 | 109241625 - | NM_001079883 | Bcl11b  | 1071  | 109240354 | 109240554 |
| 12 | 109148613 | 109241625 - | NM_001286343 | Bcl11b  | 1071  | 109240354 | 109240554 |
| 12 | 109148613 | 109241625 - | NM_021399    | Bcl11b  | 1071  | 109240354 | 109240554 |
| 12 | 109344641 | 109417495 - | NM_028262    | Setd3   | 12668 | 109404627 | 109404827 |
| 12 | 109344641 | 109417495 - | NM_028262    | Setd3   | 52284 | 109365011 | 109365211 |
| 12 | 109444555 | 109513628 - | NM_001159910 | Ccdc85c | 4635  | 109508793 | 109508993 |
| 12 | 109444555 | 109513628 - | NM_001159910 | Ccdc85c | -609  | 109514237 | 109514437 |
| 12 | 109444555 | 109513628 - | NM_001159910 | Ccdc85c | 1533  | 109511895 | 109512095 |
| 12 | 109444555 | 109513628 - | NM_001159910 | Ccdc85c | 38107 | 109475321 | 109475521 |
| 12 | 109444555 | 109513628 - | NM_001159910 | Ccdc85c | 7921  | 109505507 | 109505707 |
| 12 | 109792930 | 109926726 + | NM_001163394 | Evl     | 68754 | 109861684 | 109861884 |
| 12 | 109792930 | 109926726 + | NM_001163394 | Evl     | 67815 | 109860745 | 109860945 |
| 12 | 109792930 | 109926726 + | NM_007965    | Evl     | 68754 | 109861684 | 109861884 |
| 12 | 109792930 | 109926726 + | NM_007965    | Evl     | 67815 | 109860745 | 109860945 |
| 12 | 109843976 | 109926726 + | NM_001163395 | Evl     | 17708 | 109861684 | 109861884 |
| 12 | 109843976 | 109926726 + | NM_001163395 | Evl     | 16769 | 109860745 | 109860945 |
| 12 | 109925002 | 109940517 - | NM_001171002 | Degs2   | -8968 | 109949485 | 109949685 |
| 12 | 109925002 | 109940517 - | NM_001171002 | Degs2   | 3995  | 109936322 | 109936522 |
| 12 | 109925002 | 109940517 - | NM_001171002 | Degs2   | -188  | 109940705 | 109940905 |
| 12 | 109925002 | 109940517 - | NM_001171002 | Degs2   | 8106  | 109932211 | 109932411 |
| 12 | 109925002 | 109940517 - | NM_001171002 | Degs2   | 12843 | 109927474 | 109927674 |
| 12 | 109928432 | 109940517 - | NM_027299    | Degs2   | -8968 | 109949485 | 109949685 |
| 12 | 109928432 | 109940517 - | NM_027299    | Degs2   | 3995  | 109936322 | 109936522 |
| 12 | 109928432 | 109940517 - | NM_027299    | Degs2   | -188  | 109940705 | 109940905 |
| 12 | 109928432 | 109940517 - | NM_027299    | Degs2   | 8106  | 109932211 | 109932411 |
| 12 | 111685389 | 111809901 + | NM_001135001 | Ppp2r5c | 12774 | 111698163 | 111698363 |

|    |           |             |              |               |       |           |           |
|----|-----------|-------------|--------------|---------------|-------|-----------|-----------|
| 12 | 111839605 | 111905155 + | NM_030238    | Dync1h1       | -1321 | 111838084 | 111838284 |
| 12 | 111976159 | 112033239 + | NM_027149    | Wdr20         | 85    | 111976244 | 111976444 |
| 12 | 112046008 | 112079150 - | NM_011973    | Mok           | 1037  | 112077913 | 112078113 |
| 12 | 112232608 | 112252083 + | NR_036598    | 6030440G07Rik | 13454 | 112246062 | 112246262 |
| 12 | 112278009 | 112351598 + | NM_198023    | Rcor1         | -4419 | 112273390 | 112273590 |
| 12 | 112398061 | 112422703 - | NR_130987    | 4930595D18Rik | 7859  | 112414644 | 112414844 |
| 12 | 112404581 | 112505367 + | NM_001286122 | Traf3         | 10063 | 112414644 | 112414844 |
| 12 | 112404581 | 112505367 + | NM_011632    | Traf3         | 10063 | 112414644 | 112414844 |
| 12 | 112509322 | 112514638 + | NM_033603    | Amn           | -3036 | 112506086 | 112506286 |
| 12 | 112531183 | 112615930 - | NM_183016    | Cdc42bpb      | 1446  | 112614284 | 112614484 |
| 12 | 112655641 | 112669892 + | NM_001289487 | Exoc3l4       | 11631 | 112667272 | 112667472 |
| 12 | 112655641 | 112669892 + | NM_001289487 | Exoc3l4       | 2895  | 112658536 | 112658736 |
| 12 | 112655641 | 112669892 + | NM_028807    | Exoc3l4       | 11631 | 112667272 | 112667472 |
| 12 | 112655641 | 112669892 + | NM_028807    | Exoc3l4       | 2895  | 112658536 | 112658736 |
| 12 | 112655656 | 112669892 + | NM_001289488 | Exoc3l4       | 11616 | 112667272 | 112667472 |
| 12 | 112655656 | 112669892 + | NM_001289488 | Exoc3l4       | 2880  | 112658536 | 112658736 |
| 12 | 112655656 | 112669890 + | NM_001289489 | Exoc3l4       | 11616 | 112667272 | 112667472 |
| 12 | 112655656 | 112669890 + | NM_001289489 | Exoc3l4       | 2880  | 112658536 | 112658736 |
| 12 | 112680872 | 112693230 + | NM_009396    | Tnfaip2       | -3459 | 112677213 | 112677413 |
| 12 | 112812721 | 112894439 + | NM_021516    | Mark3         | 35711 | 112848432 | 112848632 |
| 12 | 112812721 | 112894439 + | NM_022801    | Mark3         | 35711 | 112848432 | 112848632 |
| 12 | 112907566 | 112910550 - | NM_021273    | Ckb           | -3604 | 112914154 | 112914354 |
| 12 | 112907566 | 112910550 - | NM_021273    | Ckb           | -2881 | 112913431 | 112913631 |
| 12 | 112916316 | 112922114 + | NM_001099792 | Trmt61a       | -1962 | 112914154 | 112914354 |
| 12 | 112916316 | 112922114 + | NM_001099792 | Trmt61a       | -2685 | 112913431 | 112913631 |
| 12 | 112916316 | 112922114 + | NM_001099793 | Trmt61a       | -1962 | 112914154 | 112914354 |
| 12 | 112916316 | 112922114 + | NM_001099793 | Trmt61a       | -2685 | 112913431 | 112913631 |
| 12 | 112916316 | 112922114 + | NM_177374    | Trmt61a       | -1962 | 112914154 | 112914354 |
| 12 | 112916316 | 112922114 + | NM_177374    | Trmt61a       | -2685 | 112913431 | 112913631 |
| 12 | 113041404 | 113052053 - | NM_028875    | Xrcc3         | -1673 | 113053726 | 113053926 |

|    |           |             |              |               |        |           |           |
|----|-----------|-------------|--------------|---------------|--------|-----------|-----------|
| 12 | 113041404 | 113052053 - | NM_028875    | Xrcc3         | -3278  | 113055331 | 113055531 |
| 12 | 113052381 | 113066600 + | NM_026752    | Zfyve21       | 1345   | 113053726 | 113053926 |
| 12 | 113052381 | 113066600 + | NM_026752    | Zfyve21       | 2950   | 113055331 | 113055531 |
| 12 | 113066669 | 113146267 - | NM_011625    | Ppp1r13b      | 10803  | 113135264 | 113135464 |
| 12 | 113180202 | 113182694 - | NR_029464    | 5033406O09Rik | -234   | 113182928 | 113183128 |
| 12 | 113209770 | 113307066 + | NM_029056    | Tdrd9         | 29610  | 113239380 | 113239580 |
| 12 | 113209770 | 113307066 + | NM_029056    | Tdrd9         | 94121  | 113303891 | 113304091 |
| 12 | 113344894 | 113365785 + | NM_001081169 | Aspg          | 20686  | 113365580 | 113365780 |
| 12 | 113369091 | 113369167 + | NR_029590    | Mir203        | -1410  | 113367481 | 113367681 |
| 12 | 113369091 | 113369167 + | NR_029590    | Mir203        | -3311  | 113365580 | 113365780 |
| 12 | 113384419 | 113419959 + | NM_001097621 | Kif26a        | 35455  | 113419874 | 113420074 |
| 12 | 113826995 | 113853769 + | NM_198411    | Inf2          | -228   | 113826567 | 113826767 |
| 12 | 113826995 | 113853769 + | NM_198411    | Inf2          | -8308  | 113818487 | 113818687 |
| 12 | 113892032 | 113912488 - | NM_001165894 | Akt1          | -294   | 113912782 | 113912982 |
| 12 | 113892032 | 113912488 - | NM_009652    | Akt1          | -294   | 113912782 | 113912982 |
| 12 | 113917051 | 113920959 + | NM_001100460 | Zbtb42        | -4069  | 113912782 | 113912982 |
| 12 | 114058446 | 114067601 - | NM_028023    | Cdca4         | -4192  | 114071793 | 114071993 |
| 12 | 114172944 | 114180330 - | NM_025399    | Nudt14        | -8039  | 114188369 | 114188569 |
| 12 | 114390223 | 114392091 + | NM_007763    | Crip1         | -3471  | 114386552 | 114386752 |
| 12 | 114390223 | 114392091 + | NM_007763    | Crip1         | -802   | 114389221 | 114389421 |
| 12 | 114390223 | 114392091 + | NM_007763    | Crip1         | -4372  | 114385651 | 114385851 |
| 12 | 114394632 | 114403670 + | NM_134041    | 4930427A07Rik | -7880  | 114386552 | 114386752 |
| 12 | 114394632 | 114403670 + | NM_134041    | 4930427A07Rik | -5211  | 114389221 | 114389421 |
| 12 | 114394632 | 114403670 + | NM_134041    | 4930427A07Rik | -8781  | 114385651 | 114385851 |
| 12 | 117445523 | 117501499 - | NM_146039    | Wdr60         | 24335  | 117476964 | 117477164 |
| 12 | 118754952 | 118995452 + | NM_175930    | Rapgef5       | 52710  | 118807662 | 118807862 |
| 12 | 118754952 | 118995452 + | NM_175930    | Rapgef5       | 222685 | 118977637 | 118977837 |
| 12 | 118754952 | 118995452 + | NM_175930    | Rapgef5       | 216893 | 118971845 | 118972045 |
| 12 | 118754952 | 118995452 + | NM_175930    | Rapgef5       | 37669  | 118792621 | 118792821 |
| 13 | 3537321   | 3565508 +   | NM_008112    | Gdi2          | -7455  | 3529666   | 3529866   |

|    |          |            |              |         |        |          |          |
|----|----------|------------|--------------|---------|--------|----------|----------|
| 13 | 3881264  | 3892828 -  | NM_001047159 | Net1    | 1948   | 3890680  | 3890880  |
| 13 | 3881264  | 3892828 -  | NM_001047159 | Net1    | -576   | 3893404  | 3893604  |
| 13 | 3881264  | 3917467 -  | NM_019671    | Net1    | 26587  | 3890680  | 3890880  |
| 13 | 3881264  | 3917467 -  | NM_019671    | Net1    | -9340  | 3926807  | 3927007  |
| 13 | 3881264  | 3917467 -  | NM_019671    | Net1    | -7567  | 3925034  | 3925234  |
| 13 | 3881264  | 3917467 -  | NM_019671    | Net1    | 23863  | 3893404  | 3893604  |
| 13 | 3923941  | 3934524 +  | NM_001033879 | Tubal3  | 2866   | 3926807  | 3927007  |
| 13 | 3923941  | 3934524 +  | NM_001033879 | Tubal3  | 1093   | 3925034  | 3925234  |
| 13 | 4058837  | 4089669 +  | NM_134072    | Akr1c14 | -9615  | 4049022  | 4049222  |
| 13 | 4190433  | 4204850 +  | NM_013778    | Akr1c13 | -3996  | 4186237  | 4186437  |
| 13 | 4190433  | 4204850 +  | NM_013778    | Akr1c13 | 1566   | 4191999  | 4192199  |
| 13 | 4232986  | 4247606 +  | NM_001013785 | Akr1c19 | 0      | 4232797  | 4232997  |
| 13 | 6579120  | 6648018 -  | NM_001291071 | Pfkp    | 6969   | 6640849  | 6641049  |
| 13 | 6579120  | 6648018 -  | NM_001291071 | Pfkp    | 4699   | 6643119  | 6643319  |
| 13 | 6579120  | 6648018 -  | NM_001291071 | Pfkp    | 19880  | 6627938  | 6628138  |
| 13 | 6579120  | 6648018 -  | NM_001291071 | Pfkp    | 12870  | 6634948  | 6635148  |
| 13 | 6579120  | 6648018 -  | NM_001291071 | Pfkp    | 15563  | 6632255  | 6632455  |
| 13 | 6579120  | 6648018 -  | NM_019703    | Pfkp    | 6969   | 6640849  | 6641049  |
| 13 | 6579120  | 6648018 -  | NM_019703    | Pfkp    | 4699   | 6643119  | 6643319  |
| 13 | 6579120  | 6648018 -  | NM_019703    | Pfkp    | 19880  | 6627938  | 6628138  |
| 13 | 6579120  | 6648018 -  | NM_019703    | Pfkp    | 12870  | 6634948  | 6635148  |
| 13 | 6579120  | 6648018 -  | NM_019703    | Pfkp    | 15563  | 6632255  | 6632455  |
| 13 | 9093127  | 9173698 +  | NM_001311117 | Larp4b  | 58539  | 9151666  | 9151866  |
| 13 | 9093127  | 9173698 +  | NM_001311117 | Larp4b  | 75656  | 9168783  | 9168983  |
| 13 | 9093127  | 9173698 +  | NM_172585    | Larp4b  | 58539  | 9151666  | 9151866  |
| 13 | 9093127  | 9173698 +  | NM_172585    | Larp4b  | 75656  | 9168783  | 9168983  |
| 13 | 9875859  | 10360050 - | NM_033269    | Chrm3   | -6532  | 10366582 | 10366782 |
| 13 | 11645370 | 12199213 - | NM_023868    | Ryr2    | 127967 | 12071046 | 12071246 |
| 13 | 12531669 | 12551584 - | NM_001291055 | Lgals8  | -1108  | 12552692 | 12552892 |
| 13 | 12531669 | 12551584 - | NM_001291055 | Lgals8  | 14046  | 12537338 | 12537538 |

|    |          |            |              |         |        |          |          |
|----|----------|------------|--------------|---------|--------|----------|----------|
| 13 | 12531669 | 12554006 - | NM_001291057 | Lgals8  | 1114   | 12552692 | 12552892 |
| 13 | 12531669 | 12554006 - | NM_001291057 | Lgals8  | 16468  | 12537338 | 12537538 |
| 13 | 12531669 | 12554006 - | NM_001291060 | Lgals8  | 1114   | 12552692 | 12552892 |
| 13 | 12531669 | 12554006 - | NM_001291060 | Lgals8  | 16468  | 12537338 | 12537538 |
| 13 | 12531682 | 12554006 - | NM_001199043 | Lgals8  | 1114   | 12552692 | 12552892 |
| 13 | 12531682 | 12554006 - | NM_001199043 | Lgals8  | 16468  | 12537338 | 12537538 |
| 13 | 12531682 | 12554006 - | NM_018886    | Lgals8  | 1114   | 12552692 | 12552892 |
| 13 | 12531682 | 12554006 - | NM_018886    | Lgals8  | 16468  | 12537338 | 12537538 |
| 13 | 12563476 | 12612718 - | NM_133643    | Edaradd | 0      | 12612538 | 12612738 |
| 13 | 14156051 | 14291871 + | NM_194262    | Arid4b  | 24895  | 14180946 | 14181146 |
| 13 | 14156051 | 14291871 + | NM_198122    | Arid4b  | 24895  | 14180946 | 14181146 |
| 13 | 14702568 | 14705305 - | NM_029271    | Mrpl32  | -5844  | 14711149 | 14711349 |
| 13 | 14705509 | 14717941 + | NM_008944    | Psma2   | 5640   | 14711149 | 14711349 |
| 13 | 17807796 | 17896932 - | NM_001081058 | Cdk13   | 4228   | 17892504 | 17892704 |
| 13 | 17807796 | 17896932 - | NM_027118    | Cdk13   | 4228   | 17892504 | 17892704 |
| 13 | 18216794 | 18473874 - | NM_175006    | Pou6f2  | 75263  | 18398411 | 18398611 |
| 13 | 18216794 | 18473874 - | NM_175006    | Pou6f2  | 186016 | 18287658 | 18287858 |
| 13 | 18809161 | 18958681 + | NM_172120    | Vps41   | 41446  | 18850607 | 18850807 |
| 13 | 19715044 | 19724693 + | NM_016687    | Sfrp4   | 7891   | 19722935 | 19723135 |
| 13 | 20182376 | 20700223 + | NM_080288    | Elmo1   | 41255  | 20223631 | 20223831 |
| 13 | 20182376 | 20700223 + | NM_080288    | Elmo1   | 210792 | 20393168 | 20393368 |
| 13 | 20182376 | 20700223 + | NM_080288    | Elmo1   | 388555 | 20570931 | 20571131 |
| 13 | 20182376 | 20700223 + | NM_080288    | Elmo1   | 293458 | 20475834 | 20476034 |
| 13 | 20182376 | 20700223 + | NM_080288    | Elmo1   | 181399 | 20363775 | 20363975 |
| 13 | 20182376 | 20700223 + | NM_080288    | Elmo1   | 210291 | 20392667 | 20392867 |
| 13 | 20182376 | 20700223 + | NM_080288    | Elmo1   | 209707 | 20392083 | 20392283 |
| 13 | 20182376 | 20700223 + | NM_080288    | Elmo1   | 141645 | 20324021 | 20324221 |
| 13 | 20182376 | 20700223 + | NM_080288    | Elmo1   | 72983  | 20255359 | 20255559 |
| 13 | 20182376 | 20700223 + | NM_080288    | Elmo1   | 31673  | 20214049 | 20214249 |
| 13 | 20564859 | 20700223 + | NM_198093    | Elmo1   | 6072   | 20570931 | 20571131 |

|    |          |            |              |           |        |          |          |
|----|----------|------------|--------------|-----------|--------|----------|----------|
| 13 | 20885982 | 21116124 + | NM_012054    | Aoah      | 124052 | 21010034 | 21010234 |
| 13 | 21378298 | 21384556 - | NM_010343    | Gpx5      | -2244  | 21386800 | 21387000 |
| 13 | 21842014 | 21842423 - | NM_178211    | Hist1h4k  | -4234  | 21846657 | 21846857 |
| 13 | 21845246 | 21845782 - | NM_178183    | Hist1h2ak | -875   | 21846657 | 21846857 |
| 13 | 21845992 | 21846423 + | NM_178201    | Hist1h2bn | 665    | 21846657 | 21846857 |
| 13 | 21871701 | 21872495 - | NM_020034    | Hist1h1b  | 780    | 21871515 | 21871715 |
| 13 | 21879357 | 21879813 + | NM_001290466 | Hist1h2bp | -7642  | 21871515 | 21871715 |
| 13 | 21879357 | 21881083 + | NM_178202    | Hist1h2bp | -7642  | 21871515 | 21871715 |
| 13 | 22419780 | 22420677 + | NM_134244    | Vmn1r197  | -7827  | 22411753 | 22411953 |
| 13 | 23548862 | 23557771 - | NM_013483    | Btn1a1    | 2195   | 23555376 | 23555576 |
| 13 | 23634792 | 23635314 - | NM_178197    | Hist1h2bh | -3297  | 23638611 | 23638811 |
| 13 | 23635921 | 23636824 + | NM_013548    | Hist1h3f  | 2690   | 23638611 | 23638811 |
| 13 | 23646901 | 23647677 + | NM_145713    | Hist1h1d  | -8090  | 23638611 | 23638811 |
| 13 | 23675539 | 23712964 - | NM_001177653 | Hist1h2be | -246   | 23713210 | 23713410 |
| 13 | 23675539 | 23712994 - | NM_178194    | Hist1h2be | -216   | 23713210 | 23713410 |
| 13 | 23713646 | 23714428 - | NM_015787    | Hist1h1e  | 1018   | 23713210 | 23713410 |
| 13 | 23775342 | 23775829 - | NM_178189    | Hist1h2ac | -968   | 23776797 | 23776997 |
| 13 | 23776068 | 23776537 + | NM_001290380 | Hist1h2bc | 729    | 23776797 | 23776997 |
| 13 | 23776068 | 23784350 + | NM_023422    | Hist1h2bc | 729    | 23776797 | 23776997 |
| 13 | 23874410 | 23883398 + | NM_001029935 | Trim38    | -3180  | 23871030 | 23871230 |
| 13 | 23960887 | 23987600 + | NR_121611    | Slc17a1   | 24874  | 23985761 | 23985961 |
| 13 | 23962142 | 23987600 + | NM_001170638 | Slc17a1   | 23619  | 23985761 | 23985961 |
| 13 | 23962142 | 23987600 + | NM_009198    | Slc17a1   | 23619  | 23985761 | 23985961 |
| 13 | 23989758 | 24006877 - | NM_177016    | Slc17a4   | -5534  | 24012411 | 24012611 |
| 13 | 23989758 | 24006877 - | NM_177016    | Slc17a4   | -282   | 24007159 | 24007359 |
| 13 | 23989758 | 24006877 - | NM_177016    | Slc17a4   | 734    | 24005943 | 24006143 |
| 13 | 24025594 | 24026026 - | NM_175663    | Hist1h2ba | -8700  | 24034726 | 24034926 |
| 13 | 24104350 | 24372660 - | NM_001311122 | Lrrc16a   | 100757 | 24271703 | 24271903 |
| 13 | 24104350 | 24372660 - | NM_001311122 | Lrrc16a   | 19176  | 24353284 | 24353484 |
| 13 | 24104350 | 24372660 - | NM_001311122 | Lrrc16a   | 120846 | 24251614 | 24251814 |

|    |          |            |              |               |        |          |          |
|----|----------|------------|--------------|---------------|--------|----------|----------|
| 13 | 24104350 | 24372660 - | NM_001311122 | Lrrc16a       | 108475 | 24263985 | 24264185 |
| 13 | 24104353 | 24372660 - | NM_026825    | Lrrc16a       | 100757 | 24271703 | 24271903 |
| 13 | 24104353 | 24372660 - | NM_026825    | Lrrc16a       | 19176  | 24353284 | 24353484 |
| 13 | 24104353 | 24372660 - | NM_026825    | Lrrc16a       | 120846 | 24251614 | 24251814 |
| 13 | 24104353 | 24372660 - | NM_026825    | Lrrc16a       | 108475 | 24263985 | 24264185 |
| 13 | 24937000 | 24993309 + | NM_001081051 | D130043K22Rik | 35202  | 24972202 | 24972402 |
| 13 | 24937000 | 24993309 + | NM_001081051 | D130043K22Rik | 14108  | 24951108 | 24951308 |
| 13 | 24937000 | 24993309 + | NR_131787    | D130043K22Rik | 35202  | 24972202 | 24972402 |
| 13 | 24937000 | 24993309 + | NR_131787    | D130043K22Rik | 14108  | 24951108 | 24951308 |
| 13 | 24999448 | 25029531 - | NM_172532    | Aldh5a1       | -1064  | 25030595 | 25030795 |
| 13 | 24999448 | 25029531 - | NM_172532    | Aldh5a1       | 505    | 25028826 | 25029026 |
| 13 | 25029270 | 25030919 + | NR_102323    | 9330162012Rik | 1325   | 25030595 | 25030795 |
| 13 | 25029270 | 25030919 + | NR_102323    | 9330162012Rik | -244   | 25028826 | 25029026 |
| 13 | 25035021 | 25083806 + | NM_008156    | Gpld1         | -4226  | 25030595 | 25030795 |
| 13 | 25035021 | 25083806 + | NM_008156    | Gpld1         | -5995  | 25028826 | 25029026 |
| 13 | 27404496 | 27411122 + | NM_011166    | Prl6a1        | -106   | 27404190 | 27404390 |
| 13 | 28551903 | 28977292 - | NR_045053    | 2610307P16Rik | 209736 | 28767356 | 28767556 |
| 13 | 28551903 | 28977292 - | NR_045053    | 2610307P16Rik | 402235 | 28574857 | 28575057 |
| 13 | 28551903 | 28977292 - | NR_045054    | 2610307P16Rik | 209736 | 28767356 | 28767556 |
| 13 | 28551903 | 28977292 - | NR_045054    | 2610307P16Rik | 402235 | 28574857 | 28575057 |
| 13 | 29283615 | 29947543 - | NR_131896    | Cdkal1        | 159064 | 29788279 | 29788479 |
| 13 | 29417171 | 29947543 - | NM_144536    | Cdkal1        | 159064 | 29788279 | 29788479 |
| 13 | 29998444 | 30076261 - | NM_001289920 | E2f3          | 68729  | 30007332 | 30007532 |
| 13 | 29998444 | 30077933 - | NM_010093    | E2f3          | 70401  | 30007332 | 30007532 |
| 13 | 30632181 | 30637186 - | NM_025710    | Uqcrfs1       | -3591  | 30640777 | 30640977 |
| 13 | 31657361 | 31674383 - | NR_029439    | 1700018A04Rik | 4630   | 31669553 | 31669753 |
| 13 | 31717685 | 31723276 + | NM_010225    | Foxf2         | 3751   | 31721436 | 31721636 |
| 13 | 31717685 | 31723276 + | NM_010225    | Foxf2         | -5933  | 31711552 | 31711752 |
| 13 | 31898515 | 31902505 + | NM_008592    | Foxc1         | 773    | 31899288 | 31899488 |
| 13 | 31911455 | 32430414 - | NM_146041    | Gmfs          | 26702  | 32403512 | 32403712 |

|    |          |            |              |               |        |          |          |
|----|----------|------------|--------------|---------------|--------|----------|----------|
| 13 | 31911455 | 32430414 - | NM_146041    | Gm            | 580    | 32429634 | 32429834 |
| 13 | 31911455 | 32430414 - | NM_146041    | Gm            | 428836 | 32001378 | 32001578 |
| 13 | 31911455 | 32430414 - | NM_146041    | Gm            | 95969  | 32334245 | 32334445 |
| 13 | 31911455 | 32430414 - | NM_146041    | Gm            | 168517 | 32261697 | 32261897 |
| 13 | 31911455 | 32430414 - | NM_146041    | Gm            | 429784 | 32000430 | 32000630 |
| 13 | 32933961 | 32943055 - | NM_025429    | Serpinb1a     | -908   | 32943963 | 32944163 |
| 13 | 34009787 | 34027953 - | NM_001164117 | Serpinb6a     | 1170   | 34026583 | 34026783 |
| 13 | 34009787 | 34027953 - | NM_001164117 | Serpinb6a     | 14019  | 34013734 | 34013934 |
| 13 | 34009787 | 34027953 - | NM_001164118 | Serpinb6a     | 1170   | 34026583 | 34026783 |
| 13 | 34009787 | 34027953 - | NM_001164118 | Serpinb6a     | 14019  | 34013734 | 34013934 |
| 13 | 34009787 | 34094664 - | NM_001243192 | Serpinb6a     | 67881  | 34026583 | 34026783 |
| 13 | 34009787 | 34094664 - | NM_001243192 | Serpinb6a     | 80730  | 34013734 | 34013934 |
| 13 | 34009787 | 34027953 - | NM_009254    | Serpinb6a     | 1170   | 34026583 | 34026783 |
| 13 | 34009787 | 34027953 - | NM_009254    | Serpinb6a     | 14019  | 34013734 | 34013934 |
| 13 | 34027901 | 34052051 + | NR_040707    | 1110046J04Rik | -1118  | 34026583 | 34026783 |
| 13 | 34129510 | 34165944 + | NM_026512    | Bphl          | 17323  | 34146833 | 34147033 |
| 13 | 34176024 | 34205142 - | NR_046184    | 4930447K03Rik | 954    | 34203988 | 34204188 |
| 13 | 34218877 | 34222224 - | NM_023716    | Tubb2b        | 1509   | 34220515 | 34220715 |
| 13 | 34271027 | 34437052 - | NM_001033167 | Slc22a23      | 24308  | 34412544 | 34412744 |
| 13 | 34271027 | 34437052 - | NM_001033167 | Slc22a23      | 12098  | 34424754 | 34424954 |
| 13 | 34719710 | 34744551 - | NM_025831    | Pxdc1         | -7467  | 34752018 | 34752218 |
| 13 | 34719710 | 34744551 - | NM_025831    | Pxdc1         | -2556  | 34747107 | 34747307 |
| 13 | 34719710 | 34744551 - | NM_025831    | Pxdc1         | -7118  | 34751669 | 34751869 |
| 13 | 34744792 | 34758644 + | NR_105041    | Gm15908       | 7226   | 34752018 | 34752218 |
| 13 | 34744792 | 34758644 + | NR_105041    | Gm15908       | 2315   | 34747107 | 34747307 |
| 13 | 34744792 | 34758644 + | NR_105041    | Gm15908       | 6877   | 34751669 | 34751869 |
| 13 | 34831511 | 34839492 + | NM_138746    | Fam50b        | -766   | 34830545 | 34830745 |
| 13 | 34831511 | 34839492 + | NM_138746    | Fam50b        | -1299  | 34830012 | 34830212 |
| 13 | 35038483 | 35055679 - | NM_026947    | Eci3          | -719   | 35056398 | 35056598 |
| 13 | 35273492 | 35279884 + | NR_045616    | 1700011B04Rik | -3190  | 35270102 | 35270302 |



|    |          |            |              |               |        |          |          |
|----|----------|------------|--------------|---------------|--------|----------|----------|
| 13 | 35302529 | 35303918 - | NR_126478    | 1700019C18Rik | -1047  | 35304965 | 35305165 |
| 13 | 35302529 | 35303918 - | NR_126478    | 1700019C18Rik | -8370  | 35312288 | 35312488 |
| 13 | 35751731 | 35965934 + | NM_009881    | Cdyl          | 76366  | 35828097 | 35828297 |
| 13 | 35751731 | 35965934 + | NM_009881    | Cdyl          | 180131 | 35931862 | 35932062 |
| 13 | 35751731 | 35965934 + | NM_009881    | Cdyl          | 96088  | 35847819 | 35848019 |
| 13 | 35833271 | 35965934 + | NM_001123386 | Cdyl          | -4974  | 35828097 | 35828297 |
| 13 | 35833271 | 35965934 + | NM_001123386 | Cdyl          | 98591  | 35931862 | 35932062 |
| 13 | 35833271 | 35965934 + | NM_001123386 | Cdyl          | 14548  | 35847819 | 35848019 |
| 13 | 36059775 | 36062258 + | NM_029628    | Ppp1r3g       | -6387  | 36053188 | 36053388 |
| 13 | 36070666 | 36209227 - | NM_201358    | Lyrn4         | -1938  | 36211165 | 36211365 |
| 13 | 36209512 | 36629465 + | NM_001039189 | Fars2         | 135828 | 36345340 | 36345540 |
| 13 | 36209512 | 36629465 + | NM_001039189 | Fars2         | 167646 | 36377158 | 36377358 |
| 13 | 36209512 | 36629465 + | NM_001039189 | Fars2         | 22764  | 36232276 | 36232476 |
| 13 | 36209512 | 36629465 + | NM_001039189 | Fars2         | 1653   | 36211165 | 36211365 |
| 13 | 36209512 | 36629465 + | NM_024274    | Fars2         | 135828 | 36345340 | 36345540 |
| 13 | 36209512 | 36629465 + | NM_024274    | Fars2         | 167646 | 36377158 | 36377358 |
| 13 | 36209512 | 36629465 + | NM_024274    | Fars2         | 22764  | 36232276 | 36232476 |
| 13 | 36209512 | 36629465 + | NM_024274    | Fars2         | 1653   | 36211165 | 36211365 |
| 13 | 37917907 | 38027404 + | NM_026830    | Rreb1         | 104330 | 38022237 | 38022437 |
| 13 | 37917907 | 38027404 + | NM_026830    | Rreb1         | 82993  | 38000900 | 38001100 |
| 13 | 37917907 | 38027404 + | NM_026830    | Rreb1         | 87202  | 38005109 | 38005309 |
| 13 | 37918781 | 38027404 + | NM_001177868 | Rreb1         | 103456 | 38022237 | 38022437 |
| 13 | 37918781 | 38027404 + | NM_001177868 | Rreb1         | 82119  | 38000900 | 38001100 |
| 13 | 37918781 | 38027404 + | NM_001177868 | Rreb1         | 86328  | 38005109 | 38005309 |
| 13 | 37918781 | 38043872 + | NR_033615    | Rreb1         | 103456 | 38022237 | 38022437 |
| 13 | 37918781 | 38043872 + | NR_033615    | Rreb1         | 113106 | 38031887 | 38032087 |
| 13 | 37918781 | 38043872 + | NR_033615    | Rreb1         | 82119  | 38000900 | 38001100 |
| 13 | 37918781 | 38043872 + | NR_033615    | Rreb1         | 86328  | 38005109 | 38005309 |
| 13 | 37919262 | 38027404 + | NM_001039188 | Rreb1         | 102975 | 38022237 | 38022437 |
| 13 | 37919262 | 38027404 + | NM_001039188 | Rreb1         | 81638  | 38000900 | 38001100 |

|    |          |            |              |               |       |          |          |
|----|----------|------------|--------------|---------------|-------|----------|----------|
| 13 | 37919262 | 38027404 + | NM_001039188 | Rreb1         | 85847 | 38005109 | 38005309 |
| 13 | 37980303 | 38043875 + | NR_033218    | Rreb1         | 41934 | 38022237 | 38022437 |
| 13 | 37980303 | 38043875 + | NR_033218    | Rreb1         | 51584 | 38031887 | 38032087 |
| 13 | 37980303 | 38043875 + | NR_033218    | Rreb1         | 20597 | 38000900 | 38001100 |
| 13 | 37980303 | 38043875 + | NR_033218    | Rreb1         | 24806 | 38005109 | 38005309 |
| 13 | 37980740 | 38043872 + | NM_001177869 | Rreb1         | 41497 | 38022237 | 38022437 |
| 13 | 37980740 | 38043872 + | NM_001177869 | Rreb1         | 51147 | 38031887 | 38032087 |
| 13 | 37980740 | 38043872 + | NM_001177869 | Rreb1         | 20160 | 38000900 | 38001100 |
| 13 | 37980740 | 38043872 + | NM_001177869 | Rreb1         | 24369 | 38005109 | 38005309 |
| 13 | 38063270 | 38086060 - | NM_025965    | Ssr1          | -122  | 38086182 | 38086382 |
| 13 | 38243163 | 38290447 + | NM_023842    | Dsp           | 19391 | 38262554 | 38262754 |
| 13 | 38296808 | 38319533 + | NM_026382    | Snrnp48       | 15249 | 38312057 | 38312257 |
| 13 | 38592140 | 38620694 - | NM_001289598 | Txndc5        | 2588  | 38617906 | 38618106 |
| 13 | 38592140 | 38619784 - | NM_001289599 | Txndc5        | 1678  | 38617906 | 38618106 |
| 13 | 38592140 | 38620354 - | NM_145367    | Txndc5        | 2248  | 38617906 | 38618106 |
| 13 | 38737560 | 38750898 - | NM_025380    | Eef1e1        | 4479  | 38746219 | 38746419 |
| 13 | 39024009 | 39052407 - | NM_001170430 | Slc35b3       | 1077  | 39051130 | 39051330 |
| 13 | 39024009 | 39052407 - | NM_001170430 | Slc35b3       | -470  | 39052877 | 39053077 |
| 13 | 39024009 | 39052407 - | NM_001170430 | Slc35b3       | 1878  | 39050329 | 39050529 |
| 13 | 39024009 | 39052745 - | NM_001170431 | Slc35b3       | 1415  | 39051130 | 39051330 |
| 13 | 39024009 | 39052745 - | NM_001170431 | Slc35b3       | -132  | 39052877 | 39053077 |
| 13 | 39024009 | 39052745 - | NM_001170431 | Slc35b3       | 2216  | 39050329 | 39050529 |
| 13 | 39024009 | 39052407 - | NM_134060    | Slc35b3       | 1077  | 39051130 | 39051330 |
| 13 | 39024009 | 39052407 - | NM_134060    | Slc35b3       | -470  | 39052877 | 39053077 |
| 13 | 39024009 | 39052407 - | NM_134060    | Slc35b3       | 1878  | 39050329 | 39050529 |
| 13 | 39052488 | 39058167 + | NR_131019    | 5033403F01Rik | -1158 | 39051130 | 39051330 |
| 13 | 39052488 | 39058167 + | NR_131019    | 5033403F01Rik | 389   | 39052877 | 39053077 |
| 13 | 39052488 | 39058167 + | NR_131019    | 5033403F01Rik | -1959 | 39050329 | 39050529 |
| 13 | 40955137 | 41056262 + | NM_023887    | Gcnt2         | -8820 | 40946117 | 40946317 |
| 13 | 40955137 | 41056262 + | NM_023887    | Gcnt2         | 57380 | 41012517 | 41012717 |

|    |          |            |              |         |        |          |          |
|----|----------|------------|--------------|---------|--------|----------|----------|
| 13 | 40955137 | 41056262 + | NM_023887    | Gcnt2   | 43854  | 40998991 | 40999191 |
| 13 | 40955137 | 41056262 + | NM_023887    | Gcnt2   | 14460  | 40969597 | 40969797 |
| 13 | 40982127 | 41056262 + | NM_008105    | Gcnt2   | 30390  | 41012517 | 41012717 |
| 13 | 40982127 | 41056262 + | NM_008105    | Gcnt2   | 16864  | 40998991 | 40999191 |
| 13 | 41013003 | 41056262 + | NM_133219    | Gcnt2   | -286   | 41012517 | 41012717 |
| 13 | 41096379 | 41108403 + | NM_026550    | Pak1ip1 | 5330   | 41101709 | 41101909 |
| 13 | 41096379 | 41108403 + | NM_026550    | Pak1ip1 | -600   | 41095579 | 41095779 |
| 13 | 41111619 | 41117952 + | NM_025387    | Tmem14c | -9710  | 41101709 | 41101909 |
| 13 | 41196796 | 41205358 - | NM_008104    | Gcm2    | 2059   | 41203099 | 41203299 |
| 13 | 41405285 | 41582730 - | NM_001111324 | Nedd9   | 142805 | 41439725 | 41439925 |
| 13 | 41405285 | 41582730 - | NM_001111324 | Nedd9   | 81490  | 41501040 | 41501240 |
| 13 | 41405285 | 41582730 - | NM_001111324 | Nedd9   | 30622  | 41551908 | 41552108 |
| 13 | 41405285 | 41582730 - | NM_001111324 | Nedd9   | 83167  | 41499363 | 41499563 |
| 13 | 41405285 | 41582730 - | NM_001111324 | Nedd9   | 136118 | 41446412 | 41446612 |
| 13 | 41405285 | 41582730 - | NM_001111324 | Nedd9   | 153321 | 41429209 | 41429409 |
| 13 | 41405285 | 41582730 - | NM_001111324 | Nedd9   | 143267 | 41439263 | 41439463 |
| 13 | 41405285 | 41582730 - | NM_001111324 | Nedd9   | 144031 | 41438499 | 41438699 |
| 13 | 41405285 | 41454371 - | NM_017464    | Nedd9   | 14446  | 41439725 | 41439925 |
| 13 | 41405285 | 41454371 - | NM_017464    | Nedd9   | 7759   | 41446412 | 41446612 |
| 13 | 41405285 | 41454371 - | NM_017464    | Nedd9   | 24962  | 41429209 | 41429409 |
| 13 | 41405285 | 41454371 - | NM_017464    | Nedd9   | 14908  | 41439263 | 41439463 |
| 13 | 41405285 | 41454371 - | NM_017464    | Nedd9   | 15672  | 41438499 | 41438699 |
| 13 | 41858517 | 41942986 - | NM_001145875 | Adtrp   | 18788  | 41923998 | 41924198 |
| 13 | 41858517 | 41942986 - | NM_001145875 | Adtrp   | 0      | 41942886 | 41943086 |
| 13 | 41858517 | 41942986 - | NM_001145875 | Adtrp   | 15770  | 41927016 | 41927216 |
| 13 | 41858517 | 41942986 - | NM_001145875 | Adtrp   | 19306  | 41923480 | 41923680 |
| 13 | 41858517 | 41942986 - | NM_001145875 | Adtrp   | 29762  | 41913024 | 41913224 |
| 13 | 41858517 | 41942858 - | NM_175417    | Adtrp   | 18660  | 41923998 | 41924198 |
| 13 | 41858517 | 41942858 - | NM_175417    | Adtrp   | -28    | 41942886 | 41943086 |
| 13 | 41858517 | 41942858 - | NM_175417    | Adtrp   | 15642  | 41927016 | 41927216 |

|    |          |            |              |         |        |          |          |
|----|----------|------------|--------------|---------|--------|----------|----------|
| 13 | 41858517 | 41942858 - | NM_175417    | Adtrp   | 19178  | 41923480 | 41923680 |
| 13 | 41858517 | 41942858 - | NM_175417    | Adtrp   | 29634  | 41913024 | 41913224 |
| 13 | 42147390 | 42280396 + | NM_007772    | Hivep1  | 36145  | 42183535 | 42183735 |
| 13 | 42147390 | 42280396 + | NM_007772    | Hivep1  | 69238  | 42216628 | 42216828 |
| 13 | 42396639 | 42403359 + | NM_010104    | Edn1    | 129    | 42396768 | 42396968 |
| 13 | 42396639 | 42403359 + | NM_010104    | Edn1    | -369   | 42396070 | 42396270 |
| 13 | 42776168 | 43233882 + | NM_001302635 | Phactr1 | 386418 | 43162586 | 43162786 |
| 13 | 42804950 | 43233882 + | NM_001005740 | Phactr1 | 357636 | 43162586 | 43162786 |
| 13 | 42961616 | 43233882 + | NM_001302636 | Phactr1 | 200970 | 43162586 | 43162786 |
| 13 | 43290888 | 43399542 - | NM_001033399 | Gfod1   | -872   | 43400414 | 43400614 |
| 13 | 43290888 | 43399542 - | NM_001033399 | Gfod1   | 1157   | 43398185 | 43398385 |
| 13 | 43290888 | 43399542 - | NM_001033399 | Gfod1   | 3195   | 43396147 | 43396347 |
| 13 | 43498042 | 43576343 - | NM_019930    | Ranbp9  | 2679   | 43573464 | 43573664 |
| 13 | 43633775 | 43655561 - | NM_001081059 | Mcur1   | 930    | 43654431 | 43654631 |
| 13 | 44826143 | 45017013 + | NM_001205044 | Jarid2  | 138777 | 44964920 | 44965120 |
| 13 | 44826143 | 45017013 + | NM_021878    | Jarid2  | 138777 | 44964920 | 44965120 |
| 13 | 44826640 | 45017013 + | NM_001205043 | Jarid2  | 138280 | 44964920 | 44965120 |
| 13 | 45017449 | 45097466 - | NM_025772    | Dtnbp1  | 78264  | 45019002 | 45019202 |
| 13 | 45645125 | 46060361 - | NM_001199304 | Atxn1   | 60722  | 45999439 | 45999639 |
| 13 | 45645125 | 46060361 - | NM_001199304 | Atxn1   | 6381   | 46053780 | 46053980 |
| 13 | 45645125 | 46060361 - | NM_001199304 | Atxn1   | 13658  | 46046503 | 46046703 |
| 13 | 45645125 | 46060361 - | NM_001199304 | Atxn1   | 105298 | 45954863 | 45955063 |
| 13 | 45645125 | 46060361 - | NM_001199305 | Atxn1   | 60722  | 45999439 | 45999639 |
| 13 | 45645125 | 46060361 - | NM_001199305 | Atxn1   | 6381   | 46053780 | 46053980 |
| 13 | 45645125 | 46060361 - | NM_001199305 | Atxn1   | 13658  | 46046503 | 46046703 |
| 13 | 45645125 | 46060361 - | NM_001199305 | Atxn1   | 105298 | 45954863 | 45955063 |
| 13 | 45645125 | 46060361 - | NM_009124    | Atxn1   | 60722  | 45999439 | 45999639 |
| 13 | 45645125 | 46060361 - | NM_009124    | Atxn1   | 6381   | 46053780 | 46053980 |
| 13 | 45645125 | 46060361 - | NM_009124    | Atxn1   | 13658  | 46046503 | 46046703 |
| 13 | 45645125 | 46060361 - | NM_009124    | Atxn1   | 105298 | 45954863 | 45955063 |

|    |          |            |              |               |       |          |          |
|----|----------|------------|--------------|---------------|-------|----------|----------|
| 13 | 46369090 | 46395485 + | NM_001005422 | Stmnd1        | -167  | 46368723 | 46368923 |
| 13 | 46369090 | 46395485 + | NM_001005422 | Stmnd1        | -5661 | 46363229 | 46363429 |
| 13 | 46597272 | 46745651 + | NM_026056    | Cap2          | 69480 | 46666752 | 46666952 |
| 13 | 46775271 | 46823219 - | NM_175749    | Nup153        | 33210 | 46789809 | 46790009 |
| 13 | 46844457 | 47025088 - | NM_010617    | Kif13a        | 70258 | 46954630 | 46954830 |
| 13 | 46844457 | 47025088 - | NM_010617    | Kif13a        | 46007 | 46978881 | 46979081 |
| 13 | 47218089 | 47343361 + | NM_146042    | Rnf144b       | 69582 | 47287671 | 47287871 |
| 13 | 47218089 | 47343361 + | NM_146042    | Rnf144b       | 71689 | 47289778 | 47289978 |
| 13 | 47289372 | 47343361 + | NM_001170643 | Rnf144b       | -1501 | 47287671 | 47287871 |
| 13 | 47289372 | 47343361 + | NM_001170643 | Rnf144b       | 406   | 47289778 | 47289978 |
| 13 | 48897119 | 48966255 - | NM_011078    | Phf2          | 17009 | 48949046 | 48949246 |
| 13 | 48897119 | 48966255 - | NM_011078    | Phf2          | -1983 | 48968238 | 48968438 |
| 13 | 51193107 | 51196097 - | NR_029463    | 9430083A17Rik | 935   | 51194962 | 51195162 |
| 13 | 51193107 | 51196097 - | NR_029463    | 9430083A17Rik | -4076 | 51200173 | 51200373 |
| 13 | 51196249 | 51247932 + | NM_001283028 | Spin1         | -1087 | 51194962 | 51195162 |
| 13 | 51196249 | 51247932 + | NM_001283028 | Spin1         | 3924  | 51200173 | 51200373 |
| 13 | 51196249 | 51247932 + | NM_001283028 | Spin1         | -5300 | 51190749 | 51190949 |
| 13 | 51196249 | 51247932 + | NM_001283030 | Spin1         | -1087 | 51194962 | 51195162 |
| 13 | 51196249 | 51247932 + | NM_001283030 | Spin1         | 3924  | 51200173 | 51200373 |
| 13 | 51196249 | 51247932 + | NM_001283030 | Spin1         | -5300 | 51190749 | 51190949 |
| 13 | 51196249 | 51247932 + | NM_146043    | Spin1         | -1087 | 51194962 | 51195162 |
| 13 | 51196249 | 51247932 + | NM_146043    | Spin1         | 3924  | 51200173 | 51200373 |
| 13 | 51196249 | 51247932 + | NM_146043    | Spin1         | -5300 | 51190749 | 51190949 |
| 13 | 51196916 | 51247932 + | NM_001283029 | Spin1         | -1754 | 51194962 | 51195162 |
| 13 | 51196916 | 51247932 + | NM_001283029 | Spin1         | 3257  | 51200173 | 51200373 |
| 13 | 51196916 | 51247932 + | NM_001283029 | Spin1         | -5967 | 51190749 | 51190949 |
| 13 | 51796617 | 51889117 - | NM_001281880 | Sema4d        | 86901 | 51802016 | 51802216 |
| 13 | 51796617 | 51889117 - | NM_001281880 | Sema4d        | 25955 | 51862962 | 51863162 |
| 13 | 51796617 | 51889117 - | NM_013660    | Sema4d        | 86901 | 51802016 | 51802216 |
| 13 | 51796617 | 51889117 - | NM_013660    | Sema4d        | 25955 | 51862962 | 51863162 |

|    |          |            |              |         |        |          |          |
|----|----------|------------|--------------|---------|--------|----------|----------|
| 13 | 51942044 | 51943844 + | NM_011817    | Gadd45g | 1848   | 51943892 | 51944092 |
| 13 | 52678806 | 52744162 + | NM_001198977 | Syk     | 24618  | 52703424 | 52703624 |
| 13 | 52692251 | 52744162 + | NM_011518    | Syk     | 11173  | 52703424 | 52703624 |
| 13 | 52930479 | 53025047 - | NM_016709    | Auh     | 7389   | 53017458 | 53017658 |
| 13 | 52930479 | 53025047 - | NM_016709    | Auh     | 37381  | 52987466 | 52987666 |
| 13 | 53062578 | 53076409 - | NM_017373    | Nfil3   | 3966   | 53072243 | 53072443 |
| 13 | 53062578 | 53076409 - | NM_017373    | Nfil3   | -1785  | 53078194 | 53078394 |
| 13 | 53204686 | 53381479 - | NM_013846    | Ror2    | 163672 | 53217607 | 53217807 |
| 13 | 53204686 | 53381479 - | NM_013846    | Ror2    | 38747  | 53342532 | 53342732 |
| 13 | 53204686 | 53381479 - | NM_013846    | Ror2    | 133866 | 53247413 | 53247613 |
| 13 | 53204686 | 53381479 - | NM_013846    | Ror2    | 166154 | 53215125 | 53215325 |
| 13 | 54605166 | 54652652 + | NM_176987    | Simc1   | -2218  | 54602748 | 54602948 |
| 13 | 54605166 | 54652652 + | NM_176987    | Simc1   | -320   | 54604646 | 54604846 |
| 13 | 54676374 | 54682490 + | NM_019968    | Arl10   | 573    | 54676947 | 54677147 |
| 13 | 54723145 | 54765425 + | NM_178397    | Faf2    | -123   | 54722822 | 54723022 |
| 13 | 54780760 | 54789170 - | NM_001146025 | Rnf44   | -8061  | 54797231 | 54797431 |
| 13 | 54780760 | 54789170 - | NM_001146026 | Rnf44   | -8061  | 54797231 | 54797431 |
| 13 | 54780760 | 54789562 - | NM_001146027 | Rnf44   | -7669  | 54797231 | 54797431 |
| 13 | 54780760 | 54789170 - | NM_134064    | Rnf44   | -8061  | 54797231 | 54797431 |
| 13 | 54780760 | 54795322 - | NR_027395    | Rnf44   | -1909  | 54797231 | 54797431 |
| 13 | 54780760 | 54795322 - | NR_027396    | Rnf44   | -1909  | 54797231 | 54797431 |
| 13 | 54802824 | 54838024 + | NM_001033364 | Cdhr2   | 3503   | 54806327 | 54806527 |
| 13 | 54802824 | 54838024 + | NM_001033364 | Cdhr2   | -5393  | 54797231 | 54797431 |
| 13 | 54838034 | 54851031 - | NM_012014    | Gprin1  | 11018  | 54839813 | 54840013 |
| 13 | 54838034 | 54851031 - | NM_012014    | Gprin1  | -8513  | 54859544 | 54859744 |
| 13 | 55311143 | 55419687 + | NM_008739    | Nsd1    | -7043  | 55303900 | 55304100 |
| 13 | 55501009 | 55516057 + | NM_011392    | Slc34a1 | -7219  | 55493590 | 55493790 |
| 13 | 55546433 | 55562289 + | NM_001286063 | Grk6    | 1521   | 55547954 | 55548154 |
| 13 | 55546692 | 55562289 + | NM_001038018 | Grk6    | 1262   | 55547954 | 55548154 |
| 13 | 55546692 | 55562289 + | NM_001112711 | Grk6    | 1262   | 55547954 | 55548154 |

|    |          |            |              |               |       |          |          |
|----|----------|------------|--------------|---------------|-------|----------|----------|
| 13 | 55546692 | 55562289 + | NM_001286064 | Grk6          | 1262  | 55547954 | 55548154 |
| 13 | 55546692 | 55562289 + | NM_001286065 | Grk6          | 1262  | 55547954 | 55548154 |
| 13 | 55546692 | 55560939 + | NM_001286066 | Grk6          | 1262  | 55547954 | 55548154 |
| 13 | 55546692 | 55560939 + | NM_011938    | Grk6          | 1262  | 55547954 | 55548154 |
| 13 | 55554467 | 55554533 + | NR_105908    | Mir6943       | -6313 | 55547954 | 55548154 |
| 13 | 55624596 | 55629900 - | NM_013739    | Dok3          | -7935 | 55637835 | 55638035 |
| 13 | 55631771 | 55638020 - | NM_134059    | Ddx41         | 0     | 55637835 | 55638035 |
| 13 | 55736360 | 55782629 + | NM_001282055 | Ddx46         | 9195  | 55745555 | 55745755 |
| 13 | 55816011 | 55827589 + | NM_175150    | Txndc15       | -768  | 55815043 | 55815243 |
| 13 | 56390006 | 56397913 - | NM_019568    | Cxcl14        | 643   | 56397070 | 56397270 |
| 13 | 56539716 | 56573725 + | NM_177809    | Slc25a48      | 28059 | 56567775 | 56567975 |
| 13 | 56539716 | 56573725 + | NM_177809    | Slc25a48      | 18978 | 56558694 | 56558894 |
| 13 | 56643821 | 56649900 - | NM_010702    | Lect2         | -6089 | 56655989 | 56656189 |
| 13 | 56643821 | 56649900 - | NM_010702    | Lect2         | -1966 | 56651866 | 56652066 |
| 13 | 56643821 | 56649900 - | NM_010702    | Lect2         | -171  | 56650071 | 56650271 |
| 13 | 56710964 | 56740701 + | NM_009369    | Tgfbi         | 21146 | 56732110 | 56732310 |
| 13 | 56710964 | 56740701 + | NM_009369    | Tgfbi         | 22338 | 56733302 | 56733502 |
| 13 | 56804371 | 56843740 + | NM_008541    | Smad5         | 890   | 56805261 | 56805461 |
| 13 | 56804371 | 56843740 + | NM_008541    | Smad5         | 7750  | 56812121 | 56812321 |
| 13 | 56804413 | 56843740 + | NM_001164041 | Smad5         | 848   | 56805261 | 56805461 |
| 13 | 56804413 | 56843740 + | NM_001164041 | Smad5         | 7708  | 56812121 | 56812321 |
| 13 | 56805029 | 56843740 + | NM_001164042 | Smad5         | 232   | 56805261 | 56805461 |
| 13 | 56805029 | 56843740 + | NM_001164042 | Smad5         | 7092  | 56812121 | 56812321 |
| 13 | 58277517 | 58317015 - | NM_026842    | Ubqln1        | 845   | 58315970 | 58316170 |
| 13 | 58277517 | 58317015 - | NM_152234    | Ubqln1        | 845   | 58315970 | 58316170 |
| 13 | 58481407 | 58486587 - | NM_027335    | 2210016F16Rik | -2867 | 58489454 | 58489654 |
| 13 | 58481407 | 58486587 - | NM_027335    | 2210016F16Rik | -501  | 58487088 | 58487288 |
| 13 | 58654669 | 58712239 - | NM_022317    | Slc28a3       | 11935 | 58700104 | 58700304 |
| 13 | 59550896 | 59658284 - | NM_001284219 | Agtpbp1       | 7111  | 59650973 | 59651173 |
| 13 | 59550896 | 59658284 - | NM_001284219 | Agtpbp1       | 3838  | 59654246 | 59654446 |

|    |          |            |              |               |        |          |          |
|----|----------|------------|--------------|---------------|--------|----------|----------|
| 13 | 59550896 | 59658709 - | NM_023328    | Agtpbp1       | 7536   | 59650973 | 59651173 |
| 13 | 59550896 | 59658709 - | NM_023328    | Agtpbp1       | 4263   | 59654246 | 59654446 |
| 13 | 59555211 | 59645813 - | NM_001284221 | Agtpbp1       | -5160  | 59650973 | 59651173 |
| 13 | 59555211 | 59645813 - | NM_001284221 | Agtpbp1       | -8433  | 59654246 | 59654446 |
| 13 | 59594765 | 59658709 - | NM_001048008 | Agtpbp1       | 7536   | 59650973 | 59651173 |
| 13 | 59594765 | 59658709 - | NM_001048008 | Agtpbp1       | 4263   | 59654246 | 59654446 |
| 13 | 59594765 | 59658709 - | NM_001284218 | Agtpbp1       | 7536   | 59650973 | 59651173 |
| 13 | 59594765 | 59658709 - | NM_001284218 | Agtpbp1       | 4263   | 59654246 | 59654446 |
| 13 | 59736357 | 59777146 - | NM_001035122 | Golm1         | -4199  | 59781345 | 59781545 |
| 13 | 59736357 | 59777146 - | NM_001035122 | Golm1         | 6857   | 59770089 | 59770289 |
| 13 | 59736357 | 59777146 - | NM_027307    | Golm1         | -4199  | 59781345 | 59781545 |
| 13 | 59736357 | 59777146 - | NM_027307    | Golm1         | 6857   | 59770089 | 59770289 |
| 13 | 59856776 | 59871151 - | NM_026921    | Isca1         | -456   | 59871607 | 59871807 |
| 13 | 59871327 | 59875042 + | NR_015349    | Etohd2        | 280    | 59871607 | 59871807 |
| 13 | 59873240 | 59924509 - | NM_153538    | Zcchc6        | -9498  | 59934007 | 59934207 |
| 13 | 59873240 | 59924509 - | NM_153538    | Zcchc6        | 8646   | 59915663 | 59915863 |
| 13 | 60703308 | 60864553 + | NM_001285917 | Dapk1         | 136533 | 60839841 | 60840041 |
| 13 | 60703308 | 60864553 + | NM_029653    | Dapk1         | 136533 | 60839841 | 60840041 |
| 13 | 60703572 | 60864553 + | NM_134062    | Dapk1         | 136269 | 60839841 | 60840041 |
| 13 | 62938245 | 62959731 - | NM_007994    | Fbp2          | 1180   | 62958351 | 62958551 |
| 13 | 62938245 | 62959731 - | NM_007994    | Fbp2          | -954   | 62960685 | 62960885 |
| 13 | 62938245 | 62959731 - | NM_007994    | Fbp2          | 0      | 62959720 | 62959920 |
| 13 | 62938245 | 62959731 - | NM_007994    | Fbp2          | 16900  | 62942631 | 62942831 |
| 13 | 62966113 | 62989643 - | NM_019395    | Fbp1          | 7804   | 62981639 | 62981839 |
| 13 | 62966113 | 62989643 - | NM_019395    | Fbp1          | -1158  | 62990801 | 62991001 |
| 13 | 63066253 | 63404186 + | NM_001289924 | 2010111I01Rik | 111585 | 63177838 | 63178038 |
| 13 | 63066253 | 63404186 + | NM_001289924 | 2010111I01Rik | 307735 | 63373988 | 63374188 |
| 13 | 63066253 | 63404186 + | NM_001289924 | 2010111I01Rik | 314015 | 63380268 | 63380468 |
| 13 | 63066253 | 63404186 + | NM_001289924 | 2010111I01Rik | 141249 | 63207502 | 63207702 |
| 13 | 63066253 | 63404186 + | NM_001289924 | 2010111I01Rik | 128045 | 63194298 | 63194498 |



|    |          |            |              |               |        |          |          |
|----|----------|------------|--------------|---------------|--------|----------|----------|
| 13 | 63066253 | 63404186 + | NM_001289924 | 2010111I01Rik | 107567 | 63173820 | 63174020 |
| 13 | 63066253 | 63404186 + | NM_001289926 | 2010111I01Rik | 111585 | 63177838 | 63178038 |
| 13 | 63066253 | 63404186 + | NM_001289926 | 2010111I01Rik | 307735 | 63373988 | 63374188 |
| 13 | 63066253 | 63404186 + | NM_001289926 | 2010111I01Rik | 314015 | 63380268 | 63380468 |
| 13 | 63066253 | 63404186 + | NM_001289926 | 2010111I01Rik | 141249 | 63207502 | 63207702 |
| 13 | 63066253 | 63404186 + | NM_001289926 | 2010111I01Rik | 128045 | 63194298 | 63194498 |
| 13 | 63066253 | 63404186 + | NM_001289926 | 2010111I01Rik | 107567 | 63173820 | 63174020 |
| 13 | 63341338 | 63404186 + | NR_110520    | 2010111I01Rik | 32650  | 63373988 | 63374188 |
| 13 | 63341338 | 63404186 + | NR_110520    | 2010111I01Rik | 38930  | 63380268 | 63380468 |
| 13 | 63341338 | 63427405 + | NR_110521    | 2010111I01Rik | 85302  | 63426640 | 63426840 |
| 13 | 63341338 | 63427405 + | NR_110521    | 2010111I01Rik | 32650  | 63373988 | 63374188 |
| 13 | 63341338 | 63427405 + | NR_110521    | 2010111I01Rik | 38930  | 63380268 | 63380468 |
| 13 | 63406017 | 63533054 - | NM_001042673 | Fancc         | 106214 | 63426640 | 63426840 |
| 13 | 63406017 | 63533054 - | NM_001042673 | Fancc         | 105436 | 63427418 | 63427618 |
| 13 | 63412845 | 63533054 - | NM_001282942 | Fancc         | 106214 | 63426640 | 63426840 |
| 13 | 63412845 | 63533054 - | NM_001282942 | Fancc         | 105436 | 63427418 | 63427618 |
| 13 | 63412845 | 63533054 - | NM_007985    | Fancc         | 106214 | 63426640 | 63426840 |
| 13 | 63412845 | 63533054 - | NM_007985    | Fancc         | 105436 | 63427418 | 63427618 |
| 13 | 63777065 | 63835607 - | NR_126476    | 1700024I08Rik | 51672  | 63783735 | 63783935 |
| 13 | 63777065 | 63835607 - | NR_126476    | 1700024I08Rik | 52796  | 63782611 | 63782811 |
| 13 | 64263174 | 64287846 + | NM_019986    | Habp4         | 19058  | 64282232 | 64282432 |
| 13 | 64293853 | 64349847 - | NM_001122989 | Cdc14b        | 16556  | 64333091 | 64333291 |
| 13 | 64293853 | 64376297 - | NM_172587    | Cdc14b        | 43006  | 64333091 | 64333291 |
| 13 | 64293853 | 64376297 - | NM_172587    | Cdc14b        | -476   | 64376773 | 64376973 |
| 13 | 67013034 | 67034009 - | NM_025547    | Mterf3        | -5928  | 67039937 | 67040137 |
| 13 | 67033766 | 67099338 + | NM_008959    | Ptdss1        | 58767  | 67092533 | 67092733 |
| 13 | 67033766 | 67099338 + | NM_008959    | Ptdss1        | 6171   | 67039937 | 67040137 |
| 13 | 67097754 | 67133342 - | NR_045851    | 4933433G19Rik | 2336   | 67130806 | 67131006 |
| 13 | 67413934 | 67433497 - | NM_177622    | Zfp595        | 0      | 67433320 | 67433520 |
| 13 | 67440245 | 67461509 - | NM_001038651 | Zfp953        | 8      | 67461301 | 67461501 |

|    |          |            |              |               |       |          |          |
|----|----------|------------|--------------|---------------|-------|----------|----------|
| 13 | 68699657 | 68720982 - | NM_001308475 | Mtrr          | 463   | 68720319 | 68720519 |
| 13 | 68699657 | 68721047 - | NM_172480    | Mtrr          | 528   | 68720319 | 68720519 |
| 13 | 68699657 | 68721047 - | NR_131892    | Mtrr          | 528   | 68720319 | 68720519 |
| 13 | 68721125 | 68731157 + | NM_027123    | Fastkd3       | -606  | 68720319 | 68720519 |
| 13 | 69636837 | 69672743 - | NM_001169131 | Papd7         | 23996 | 69648547 | 69648747 |
| 13 | 69636837 | 69672743 - | NM_198600    | Papd7         | 23996 | 69648547 | 69648747 |
| 13 | 69712327 | 69750342 - | NM_175283    | Srd5a1        | 2859  | 69747283 | 69747483 |
| 13 | 69712327 | 69750342 - | NM_175283    | Srd5a1        | 19830 | 69730312 | 69730512 |
| 13 | 69750894 | 69774658 + | NM_145354    | Nsun2         | -3411 | 69747283 | 69747483 |
| 13 | 73343539 | 73366549 - | NR_126459    | 4930555K05Rik | -1159 | 73367708 | 73367908 |
| 13 | 73818605 | 73838144 - | NM_028878    | Slc6a19       | -7577 | 73845721 | 73845921 |
| 13 | 73818605 | 73838144 - | NM_028878    | Slc6a19       | -39   | 73838183 | 73838383 |
| 13 | 73818605 | 73838144 - | NM_028878    | Slc6a19       | 3843  | 73834101 | 73834301 |
| 13 | 73837274 | 73847305 + | NM_027780    | Slc6a19os     | 8447  | 73845721 | 73845921 |
| 13 | 73837274 | 73847305 + | NM_027780    | Slc6a19os     | 909   | 73838183 | 73838383 |
| 13 | 73837274 | 73847305 + | NM_027780    | Slc6a19os     | -2973 | 73834101 | 73834301 |
| 13 | 73901145 | 73954191 + | NM_011390    | Slc12a7       | 10315 | 73911460 | 73911660 |
| 13 | 73901145 | 73954191 + | NM_011390    | Slc12a7       | -7557 | 73893388 | 73893588 |
| 13 | 73901145 | 73954191 + | NM_011390    | Slc12a7       | 6676  | 73907821 | 73908021 |
| 13 | 74258963 | 74303513 + | NM_001081060 | Slc9a3        | 7006  | 74265969 | 74266169 |
| 13 | 74258963 | 74303513 + | NM_001081060 | Slc9a3        | 25919 | 74284882 | 74285082 |
| 13 | 74440569 | 74454775 - | NM_011051    | Pdcd6         | 1176  | 74453399 | 74453599 |
| 13 | 74830742 | 74946209 - | NM_001301153 | Cast          | 27145 | 74918864 | 74919064 |
| 13 | 74830742 | 74945409 - | NM_009817    | Cast          | 26345 | 74918864 | 74919064 |
| 13 | 75844932 | 75909807 + | NM_138953    | Ell2          | 2005  | 75846937 | 75847137 |
| 13 | 75844932 | 75909807 + | NM_138953    | Ell2          | 42401 | 75887333 | 75887533 |
| 13 | 75844932 | 75909807 + | NM_138953    | Ell2          | 34884 | 75879816 | 75880016 |
| 13 | 75977334 | 75987600 + | NM_053108    | Glrx          | -7009 | 75970125 | 75970325 |
| 13 | 76006985 | 76081273 - | NM_028493    | Rhobtb3       | 68974 | 76012099 | 76012299 |
| 13 | 76197870 | 76236109 - | NM_029847    | Arsk          | -4    | 76236113 | 76236313 |

|    |          |            |              |               |        |          |          |
|----|----------|------------|--------------|---------------|--------|----------|----------|
| 13 | 76236182 | 76325432 + | NM_001081352 | Ttc37         | 0      | 76236113 | 76236313 |
| 13 | 77274797 | 77752941 + | NM_001145676 | 2210408I21Rik | 303378 | 77578175 | 77578375 |
| 13 | 77847951 | 78305502 + | NM_001163419 | Fam172a       | 1367   | 77849318 | 77849518 |
| 13 | 77847951 | 78305502 + | NM_001163420 | Fam172a       | 1367   | 77849318 | 77849518 |
| 13 | 77847951 | 78305502 + | NM_138312    | Fam172a       | 1367   | 77849318 | 77849518 |
| 13 | 77847951 | 78305502 + | NR_028109    | Fam172a       | 1367   | 77849318 | 77849518 |
| 13 | 81079664 | 81087859 + | NR_103550    | 5430425K12Rik | -176   | 81079288 | 81079488 |
| 13 | 81103335 | 81218857 + | NR_015587    | 9330111N05Rik | 71732  | 81175067 | 81175267 |
| 13 | 81234067 | 81772144 - | NM_054053    | Adgrv1        | 224227 | 81547717 | 81547917 |
| 13 | 81796805 | 81810890 + | NM_030257    | Lysmd3        | 591    | 81797396 | 81797596 |
| 13 | 84361901 | 84435572 + | NM_175187    | Tmem161b      | 42205  | 84404106 | 84404306 |
| 13 | 84361901 | 84435572 + | NM_175187    | Tmem161b      | 32156  | 84394057 | 84394257 |
| 13 | 84361901 | 84435572 + | NM_175187    | Tmem161b      | 803    | 84362704 | 84362904 |
| 13 | 84361901 | 84435572 + | NR_029418    | Tmem161b      | 42205  | 84404106 | 84404306 |
| 13 | 84361901 | 84435572 + | NR_029418    | Tmem161b      | 32156  | 84394057 | 84394257 |
| 13 | 84361901 | 84435572 + | NR_029418    | Tmem161b      | 803    | 84362704 | 84362904 |
| 13 | 84361901 | 84435572 + | NR_029419    | Tmem161b      | 42205  | 84404106 | 84404306 |
| 13 | 84361901 | 84435572 + | NR_029419    | Tmem161b      | 32156  | 84394057 | 84394257 |
| 13 | 84361901 | 84435572 + | NR_029419    | Tmem161b      | 803    | 84362704 | 84362904 |
| 13 | 85354304 | 85429092 - | NM_145452    | Rasa1         | 70551  | 85358341 | 85358541 |
| 13 | 89988519 | 90229214 - | NM_028012    | Xrcc4         | -2445  | 90231659 | 90231859 |
| 13 | 90229272 | 90254527 + | NM_025335    | Tmem167       | 2387   | 90231659 | 90231859 |
| 13 | 91074954 | 91363593 - | NM_025770    | Atg10         | 66729  | 91296664 | 91296864 |
| 13 | 91074954 | 91363593 - | NM_025770    | Atg10         | 43322  | 91320071 | 91320271 |
| 13 | 91074954 | 91363593 - | NM_025770    | Atg10         | 66300  | 91297093 | 91297293 |
| 13 | 91841270 | 91881478 - | NR_015501    | 4833422C13Rik | -1140  | 91882618 | 91882818 |
| 13 | 91847507 | 91881478 - | NR_028313    | 4833422C13Rik | -1140  | 91882618 | 91882818 |
| 13 | 91853213 | 91881478 - | NR_028314    | 4833422C13Rik | -1140  | 91882618 | 91882818 |
| 13 | 91881126 | 91925754 + | NM_028790    | Acot12        | 16814  | 91897940 | 91898140 |
| 13 | 91881126 | 91925754 + | NM_028790    | Acot12        | 24246  | 91905372 | 91905572 |

|    |          |            |              |         |        |          |          |
|----|----------|------------|--------------|---------|--------|----------|----------|
| 13 | 91881126 | 91925754 + | NM_028790    | Acot12  | 36665  | 91917791 | 91917991 |
| 13 | 91881126 | 91925754 + | NM_028790    | Acot12  | 20615  | 91901741 | 91901941 |
| 13 | 91881126 | 91925754 + | NM_028790    | Acot12  | 17244  | 91898370 | 91898570 |
| 13 | 91881126 | 91925754 + | NM_028790    | Acot12  | 1492   | 91882618 | 91882818 |
| 13 | 91992992 | 92016491 - | NM_198415    | Ckmt2   | -426   | 92016917 | 92017117 |
| 13 | 92020012 | 92901450 - | NM_009027    | Rasgrf2 | 773493 | 92127757 | 92127957 |
| 13 | 92020012 | 92901450 - | NM_009027    | Rasgrf2 | 89308  | 92811942 | 92812142 |
| 13 | 92020012 | 92901450 - | NM_009027    | Rasgrf2 | 779579 | 92121671 | 92121871 |
| 13 | 92020012 | 92901450 - | NM_009027    | Rasgrf2 | 784580 | 92116670 | 92116870 |
| 13 | 93381093 | 93481902 + | NM_172588    | Serinc5 | 2063   | 93383156 | 93383356 |
| 13 | 94200052 | 94269764 - | NM_021310    | Jmy     | 1500   | 94268064 | 94268264 |
| 13 | 94444391 | 94522779 + | NM_028772    | Dmgdh   | 30612  | 94475003 | 94475203 |
| 13 | 94827751 | 94965365 + | NM_172589    | Lhfpl2  | 10779  | 94838530 | 94838730 |
| 13 | 94827751 | 94965365 + | NM_172589    | Lhfpl2  | 124641 | 94952392 | 94952592 |
| 13 | 94827751 | 94965365 + | NM_172589    | Lhfpl2  | 104678 | 94932429 | 94932629 |
| 13 | 94827751 | 94965365 + | NM_172589    | Lhfpl2  | 102664 | 94930415 | 94930615 |
| 13 | 94971388 | 95055237 - | NM_029153    | Scamp1  | 25727  | 95029310 | 95029510 |
| 13 | 94971388 | 95055237 - | NM_029153    | Scamp1  | 27251  | 95027786 | 95027986 |
| 13 | 95128915 | 95336272 + | NM_009680    | Ap3b1   | 132481 | 95261396 | 95261596 |
| 13 | 95128915 | 95336272 + | NM_009680    | Ap3b1   | 86294  | 95215209 | 95215409 |
| 13 | 95558898 | 95612855 + | NM_009321    | Tbca    | 40163  | 95599061 | 95599261 |
| 13 | 95558898 | 95612855 + | NM_009321    | Tbca    | 14803  | 95573701 | 95573901 |
| 13 | 95746299 | 95793272 + | NM_172590    | Wdr41   | 14490  | 95760789 | 95760989 |
| 13 | 95794060 | 95993006 - | NM_001170669 | Pde8b   | 135568 | 95857238 | 95857438 |
| 13 | 95794060 | 95993006 - | NM_001170669 | Pde8b   | 176778 | 95816028 | 95816228 |
| 13 | 95794060 | 96020260 - | NM_172263    | Pde8b   | 6684   | 96013376 | 96013576 |
| 13 | 95794060 | 96020260 - | NM_172263    | Pde8b   | 162822 | 95857238 | 95857438 |
| 13 | 95794060 | 96020260 - | NM_172263    | Pde8b   | 204032 | 95816028 | 95816228 |
| 13 | 96281684 | 96295196 - | NM_007974    | F2rl1   | 302    | 96294694 | 96294894 |
| 13 | 96397132 | 96661878 - | NM_027711    | lqgap2  | 113933 | 96547745 | 96547945 |

|    |          |            |              |          |        |          |          |
|----|----------|------------|--------------|----------|--------|----------|----------|
| 13 | 96397132 | 96661878 - | NM_027711    | lqgap2   | 54597  | 96607081 | 96607281 |
| 13 | 96397132 | 96661878 - | NM_027711    | lqgap2   | -7451  | 96669329 | 96669529 |
| 13 | 96397132 | 96661878 - | NM_027711    | lqgap2   | 48754  | 96612924 | 96613124 |
| 13 | 96397132 | 96661878 - | NM_027711    | lqgap2   | 79252  | 96582426 | 96582626 |
| 13 | 96397132 | 96661878 - | NM_027711    | lqgap2   | 112346 | 96549332 | 96549532 |
| 13 | 96729398 | 96902533 - | NM_029210    | Sv2c     | 121304 | 96781029 | 96781229 |
| 13 | 97158249 | 97185543 + | NM_026173    | Poc5     | -136   | 97157913 | 97158113 |
| 13 | 97186089 | 97241116 - | NM_001042714 | Ankdd1b  | 16504  | 97224412 | 97224612 |
| 13 | 97186089 | 97241116 - | NM_001042714 | Ankdd1b  | 12909  | 97228007 | 97228207 |
| 13 | 97186089 | 97241116 - | NM_001042714 | Ankdd1b  | 37341  | 97203575 | 97203775 |
| 13 | 97250644 | 97312441 - | NM_012048    | Polk     | 7260   | 97304981 | 97305181 |
| 13 | 97250644 | 97312441 - | NM_012048    | Polk     | 10623  | 97301618 | 97301818 |
| 13 | 97312690 | 97410123 + | NM_001164222 | Col4a3bp | -7509  | 97304981 | 97305181 |
| 13 | 97312690 | 97410123 + | NM_001164222 | Col4a3bp | 79276  | 97391966 | 97392166 |
| 13 | 97312690 | 97410123 + | NM_023420    | Col4a3bp | -7509  | 97304981 | 97305181 |
| 13 | 97312690 | 97410123 + | NM_023420    | Col4a3bp | 79276  | 97391966 | 97392166 |
| 13 | 97418919 | 97440892 - | NM_008255    | Hmgcr    | 7377   | 97433315 | 97433515 |
| 13 | 97418919 | 97440892 - | NM_008255    | Hmgcr    | 14060  | 97426632 | 97426832 |
| 13 | 97694644 | 97720870 + | NM_001166065 | Gcnt4    | 1471   | 97696115 | 97696315 |
| 13 | 97694644 | 97720870 + | NM_001166065 | Gcnt4    | -101   | 97694343 | 97694543 |
| 13 | 97837242 | 97899478 + | NM_001146045 | Fam169a  | 3621   | 97840863 | 97841063 |
| 13 | 97837242 | 97899478 + | NM_001146045 | Fam169a  | 53136  | 97890378 | 97890578 |
| 13 | 97841598 | 97899478 + | NM_001100458 | Fam169a  | -535   | 97840863 | 97841063 |
| 13 | 97841598 | 97899478 + | NM_001100458 | Fam169a  | 48780  | 97890378 | 97890578 |
| 13 | 97907892 | 97951152 + | NM_001146043 | Gfm2     | 37879  | 97945771 | 97945971 |
| 13 | 97907892 | 97946399 + | NM_001271463 | Gfm2     | 37879  | 97945771 | 97945971 |
| 13 | 97907892 | 97946399 + | NM_001271464 | Gfm2     | 37879  | 97945771 | 97945971 |
| 13 | 97907892 | 97946399 + | NM_001271465 | Gfm2     | 37879  | 97945771 | 97945971 |
| 13 | 97907892 | 97946399 + | NM_177266    | Gfm2     | 37879  | 97945771 | 97945971 |
| 13 | 97946286 | 97968313 - | NM_010422    | Hexb     | 13894  | 97954219 | 97954419 |

|    |           |             |              |               |        |           |           |
|----|-----------|-------------|--------------|---------------|--------|-----------|-----------|
| 13 | 98204925  | 98267620 +  | NR_110432    | Lincenc1      | 18140  | 98223065  | 98223265  |
| 13 | 98668550  | 98976121 -  | NM_012026    | Arhgef28      | 230444 | 98745477  | 98745677  |
| 13 | 98668550  | 98976121 -  | NM_012026    | Arhgef28      | 83137  | 98892784  | 98892984  |
| 13 | 98668550  | 98976121 -  | NM_012026    | Arhgef28      | 90233  | 98885688  | 98885888  |
| 13 | 98668550  | 98976121 -  | NM_012026    | Arhgef28      | 231369 | 98744552  | 98744752  |
| 13 | 99016800  | 99032948 -  | NM_178918    | Utp15         | -609   | 99033557  | 99033757  |
| 13 | 99033031  | 99043874 +  | NM_001271388 | Ankra2        | 526    | 99033557  | 99033757  |
| 13 | 99033031  | 99044710 +  | NM_001271389 | Ankra2        | 526    | 99033557  | 99033757  |
| 13 | 99033031  | 99043874 +  | NM_001271390 | Ankra2        | 526    | 99033557  | 99033757  |
| 13 | 99033031  | 99043874 +  | NM_001271391 | Ankra2        | 526    | 99033557  | 99033757  |
| 13 | 99033031  | 99043874 +  | NM_001271392 | Ankra2        | 526    | 99033557  | 99033757  |
| 13 | 99033031  | 99043874 +  | NM_023472    | Ankra2        | 526    | 99033557  | 99033757  |
| 13 | 99079852  | 99086962 -  | NM_001170540 | Btf3          | 4841   | 99081921  | 99082121  |
| 13 | 99079852  | 99086923 -  | NM_145455    | Btf3          | 4802   | 99081921  | 99082121  |
| 13 | 99194065  | 99205021 -  | NR_045498    | 2310005E17Rik | 10752  | 99194069  | 99194269  |
| 13 | 99456193  | 99464787 -  | NM_001025606 | Tmem171       | -4597  | 99469384  | 99469584  |
| 13 | 99493361  | 99585405 -  | NM_172591    | Fcho2         | 66298  | 99518907  | 99519107  |
| 13 | 99846483  | 99857877 -  | NR_045495    | 2310020H05Rik | -4605  | 99862482  | 99862682  |
| 13 | 100914018 | 100972078 - | NM_001126182 | Naip2         | 36203  | 100935675 | 100935875 |
| 13 | 100914018 | 100972078 - | NM_001126182 | Naip2         | 223    | 100971655 | 100971855 |
| 13 | 100914018 | 100972078 - | NM_010872    | Naip2         | 36203  | 100935675 | 100935875 |
| 13 | 100914018 | 100972078 - | NM_010872    | Naip2         | 223    | 100971655 | 100971855 |
| 13 | 100981695 | 101017292 - | NM_010870    | Naip5         | 106    | 101016986 | 101017186 |
| 13 | 100981695 | 101017292 - | NM_010870    | Naip5         | -9759  | 101027051 | 101027251 |
| 13 | 100981695 | 101017292 - | NM_010870    | Naip5         | -7822  | 101025114 | 101025314 |
| 13 | 101177725 | 101222820 - | NM_008670    | Naip1         | 38190  | 101184430 | 101184630 |
| 13 | 101267322 | 101322454 - | NM_008756    | Ocln          | 34095  | 101288159 | 101288359 |
| 13 | 101267322 | 101322454 - | NM_008756    | Ocln          | 6566   | 101315688 | 101315888 |
| 13 | 101267322 | 101322454 - | NM_008756    | Ocln          | 30285  | 101291969 | 101292169 |
| 13 | 101267322 | 101322454 - | NM_008756    | Ocln          | 35573  | 101286681 | 101286881 |

|    |           |             |              |         |        |           |           |
|----|-----------|-------------|--------------|---------|--------|-----------|-----------|
| 13 | 101387119 | 101421017 - | NM_001044371 | Rad17   | 258    | 101420559 | 101420759 |
| 13 | 101387119 | 101421017 - | NM_001283011 | Rad17   | 258    | 101420559 | 101420759 |
| 13 | 101387119 | 101421017 - | NM_011233    | Rad17   | 258    | 101420559 | 101420759 |
| 13 | 101421298 | 101436371 + | NM_027592    | Ak6     | -539   | 101420559 | 101420759 |
| 13 | 101421298 | 101426016 + | NM_027139    | Taf9    | -539   | 101420559 | 101420759 |
| 13 | 101421562 | 101426016 + | NM_001015889 | Taf9    | -803   | 101420559 | 101420759 |
| 13 | 102450716 | 102538173 - | NM_001077495 | Pik3r1  | 9859   | 102528114 | 102528314 |
| 13 | 102450716 | 102538173 - | NM_001077495 | Pik3r1  | 2856   | 102535117 | 102535317 |
| 13 | 102450716 | 102538173 - | NM_001077495 | Pik3r1  | 6319   | 102531654 | 102531854 |
| 13 | 102450716 | 102538173 - | NM_001077495 | Pik3r1  | 6952   | 102531021 | 102531221 |
| 13 | 102450716 | 102538173 - | NM_001077495 | Pik3r1  | 60280  | 102477693 | 102477893 |
| 13 | 102450716 | 102538173 - | NM_001077495 | Pik3r1  | 23007  | 102514966 | 102515166 |
| 13 | 102450716 | 102538173 - | NM_001077495 | Pik3r1  | 14410  | 102523563 | 102523763 |
| 13 | 102450716 | 102538173 - | NM_001077495 | Pik3r1  | 31372  | 102506601 | 102506801 |
| 13 | 102450716 | 102538173 - | NM_001077495 | Pik3r1  | 52871  | 102485102 | 102485302 |
| 13 | 103483638 | 103496712 + | NM_008533    | Cd180   | 7209   | 103490847 | 103491047 |
| 13 | 103522569 | 104124573 - | NM_175171    | Mast4   | 428191 | 103696182 | 103696382 |
| 13 | 103522569 | 104124573 - | NM_175171    | Mast4   | 440065 | 103684308 | 103684508 |
| 13 | 103522569 | 104124573 - | NM_175171    | Mast4   | 470112 | 103654261 | 103654461 |
| 13 | 104608866 | 104710667 - | NM_001005868 | ErbB2ip | 78961  | 104631506 | 104631706 |
| 13 | 104608866 | 104710667 - | NM_001289473 | ErbB2ip | 78961  | 104631506 | 104631706 |
| 13 | 104608866 | 104710667 - | NM_001289474 | ErbB2ip | 78961  | 104631506 | 104631706 |
| 13 | 104608866 | 104710667 - | NM_001289475 | ErbB2ip | 78961  | 104631506 | 104631706 |
| 13 | 104813519 | 104899695 - | NM_029447    | Nln     | 79839  | 104819656 | 104819856 |
| 13 | 104813519 | 104899695 - | NM_029447    | Nln     | 64994  | 104834501 | 104834701 |
| 13 | 104813519 | 104899695 - | NM_029447    | Nln     | 68566  | 104830929 | 104831129 |
| 13 | 104813519 | 104899695 - | NM_029447    | Nln     | 72762  | 104826733 | 104826933 |
| 13 | 104813519 | 104899695 - | NM_029447    | Nln     | 80379  | 104819116 | 104819316 |
| 13 | 104899870 | 104931522 + | NM_144838    | Sgtb    | 14283  | 104914153 | 104914353 |
| 13 | 105421407 | 105607034 - | NM_026072    | Cwc27   | 37353  | 105569481 | 105569681 |

|    |           |             |              |         |         |           |           |
|----|-----------|-------------|--------------|---------|---------|-----------|-----------|
| 13 | 105737233 | 105845011 - | NM_029879    | Rgs7bp  | 13681   | 105831130 | 105831330 |
| 13 | 107584519 | 107726996 - | NM_029665    | Ipo11   | -9774   | 107736770 | 107736970 |
| 13 | 107584519 | 107726996 - | NM_029665    | Ipo11   | 32717   | 107694079 | 107694279 |
| 13 | 107737209 | 107750305 + | NM_025447    | Dimt1   | -239    | 107736770 | 107736970 |
| 13 | 107750665 | 107812195 - | NM_001145779 | Kif2a   | 23142   | 107788853 | 107789053 |
| 13 | 107750665 | 107812195 - | NM_001145779 | Kif2a   | 24932   | 107787063 | 107787263 |
| 13 | 107750665 | 107812195 - | NM_008442    | Kif2a   | 23142   | 107788853 | 107789053 |
| 13 | 107750665 | 107812195 - | NM_008442    | Kif2a   | 24932   | 107787063 | 107787263 |
| 13 | 108514697 | 108680259 - | NM_145456    | Zswim6  | 63340   | 108616719 | 108616919 |
| 13 | 108514697 | 108680259 - | NM_145456    | Zswim6  | 42464   | 108637595 | 108637795 |
| 13 | 108834668 | 108839341 + | NM_001048250 | Smim15  | -4381   | 108830087 | 108830287 |
| 13 | 109004598 | 109077302 + | NM_029001    | Elov17  | 2606    | 109007204 | 109007404 |
| 13 | 109106531 | 109179752 + | NM_178683    | Depdc1b | 23560   | 109130091 | 109130291 |
| 13 | 109106531 | 109179752 + | NM_178683    | Depdc1b | -287    | 109106044 | 109106244 |
| 13 | 109444371 | 110746178 + | NM_011056    | Pde4d   | 997709  | 110442080 | 110442280 |
| 13 | 109444371 | 110746178 + | NM_011056    | Pde4d   | 1169508 | 110613879 | 110614079 |
| 13 | 109444371 | 110746178 + | NM_011056    | Pde4d   | 1186899 | 110631270 | 110631470 |
| 13 | 109444371 | 110746178 + | NM_011056    | Pde4d   | 1153401 | 110597772 | 110597972 |
| 13 | 109444371 | 110746178 + | NM_011056    | Pde4d   | 1038828 | 110483199 | 110483399 |
| 13 | 109444371 | 110746178 + | NM_011056    | Pde4d   | 736952  | 110181323 | 110181523 |
| 13 | 109444371 | 110746178 + | NM_011056    | Pde4d   | 917255  | 110361626 | 110361826 |
| 13 | 109444371 | 110746178 + | NM_011056    | Pde4d   | 989293  | 110433664 | 110433864 |
| 13 | 109444371 | 110746178 + | NM_011056    | Pde4d   | 904160  | 110348531 | 110348731 |
| 13 | 109444371 | 110746178 + | NM_011056    | Pde4d   | 864744  | 110309115 | 110309315 |
| 13 | 109444371 | 110746178 + | NM_011056    | Pde4d   | 442262  | 109886633 | 109886833 |
| 13 | 109444371 | 110746178 + | NM_011056    | Pde4d   | 413957  | 109858328 | 109858528 |
| 13 | 112476386 | 112508803 + | NM_172593    | Mier3   | -4370   | 112471816 | 112472016 |
| 13 | 112536643 | 112599192 - | NM_011945    | Map3k1  | 4956    | 112594036 | 112594236 |
| 13 | 112536643 | 112599192 - | NM_011945    | Map3k1  | -9683   | 112608875 | 112609075 |
| 13 | 112536643 | 112599192 - | NM_011945    | Map3k1  | 12251   | 112586741 | 112586941 |



|    |           |             |              |               |       |           |           |
|----|-----------|-------------|--------------|---------------|-------|-----------|-----------|
| 13 | 113254278 | 113297069 + | NM_010560    | Il6st         | -526  | 113253552 | 113253752 |
| 13 | 113450974 | 113528961 + | NM_178746    | Slc38a9       | 12137 | 113463111 | 113463311 |
| 13 | 113450974 | 113528961 + | NM_178746    | Slc38a9       | 37641 | 113488615 | 113488815 |
| 13 | 113590985 | 113658103 + | NM_008247    | Ppap2a        | 20193 | 113611178 | 113611378 |
| 13 | 113590985 | 113658103 + | NM_008247    | Ppap2a        | 52924 | 113643909 | 113644109 |
| 13 | 113590985 | 113658103 + | NM_008247    | Ppap2a        | 7264  | 113598249 | 113598449 |
| 13 | 113590985 | 113658103 + | NM_008903    | Ppap2a        | 20193 | 113611178 | 113611378 |
| 13 | 113590985 | 113658103 + | NM_008903    | Ppap2a        | 52924 | 113643909 | 113644109 |
| 13 | 113590985 | 113658103 + | NM_008903    | Ppap2a        | 7264  | 113598249 | 113598449 |
| 13 | 113778010 | 113780987 + | NM_001081062 | Ccno          | 1957  | 113779967 | 113780167 |
| 13 | 113784076 | 113790603 + | NM_001037914 | Mcidas        | -3909 | 113779967 | 113780167 |
| 13 | 114382387 | 114408773 - | NM_130796    | Snx18         | 15510 | 114393063 | 114393263 |
| 13 | 114382387 | 114408773 - | NM_130796    | Snx18         | -691  | 114409464 | 114409664 |
| 13 | 115242470 | 115249160 - | NM_001301373 | Fst           | -6495 | 115255655 | 115255855 |
| 13 | 115242470 | 115249160 - | NM_001301375 | Fst           | -6495 | 115255655 | 115255855 |
| 13 | 115242470 | 115249160 - | NM_008046    | Fst           | -6495 | 115255655 | 115255855 |
| 13 | 115397436 | 115488031 + | NR_045976    | 4930544M13Rik | 11981 | 115409417 | 115409617 |
| 13 | 115626120 | 115722250 - | NM_008396    | Itga2         | 7815  | 115714235 | 115714435 |
| 13 | 115626120 | 115722250 - | NM_008396    | Itga2         | 34779 | 115687271 | 115687471 |
| 13 | 115626120 | 115722250 - | NM_008396    | Itga2         | 35838 | 115686212 | 115686412 |
| 13 | 118391127 | 118769836 + | NM_010408    | Hcn1          | -659  | 118390268 | 118390468 |
| 13 | 118391127 | 118769836 + | NM_010408    | Hcn1          | -7083 | 118383844 | 118384044 |
| 13 | 119392217 | 119447551 - | NR_131153    | Gm10732       | -1867 | 119449418 | 119449618 |
| 13 | 119503506 | 119581381 + | NM_008002    | Fgf10         | 36271 | 119539777 | 119539977 |
| 13 | 120123124 | 120197819 - | NM_008710    | Nnt           | -4361 | 120202180 | 120202380 |
| 13 | 120123124 | 120197819 - | NM_008710    | Nnt           | -3622 | 120201441 | 120201641 |
| 13 | 120123124 | 120197819 - | NM_008710    | Nnt           | 6624  | 120190995 | 120191195 |
| 13 | 120124334 | 120198065 - | NM_001308506 | Nnt           | -4115 | 120202180 | 120202380 |
| 13 | 120124334 | 120198065 - | NM_001308506 | Nnt           | -3376 | 120201441 | 120201641 |
| 13 | 120124334 | 120198065 - | NM_001308506 | Nnt           | 6870  | 120190995 | 120191195 |

|    |           |             |              |               |       |           |           |
|----|-----------|-------------|--------------|---------------|-------|-----------|-----------|
| 13 | 120276064 | 120277192 - | NR_027974    | 3110070M22Rik | -527  | 120277719 | 120277919 |
| 13 | 120276064 | 120277192 - | NR_027974    | 3110070M22Rik | -3853 | 120281045 | 120281245 |
| 13 | 120276064 | 120277192 - | NR_027974    | 3110070M22Rik | -4495 | 120281687 | 120281887 |
| 13 | 120276064 | 120277192 - | NR_027974    | 3110070M22Rik | -2527 | 120279719 | 120279919 |
| 13 | 120276064 | 120277192 - | NR_027974    | 3110070M22Rik | -1509 | 120278701 | 120278901 |
| 13 | 120276064 | 120277192 - | NR_027974    | 3110070M22Rik | 490   | 120276502 | 120276702 |
| 13 | 120276846 | 120284313 + | NM_001039244 | Gm7120        | 873   | 120277719 | 120277919 |
| 13 | 120276846 | 120284313 + | NM_001039244 | Gm7120        | 4199  | 120281045 | 120281245 |
| 13 | 120276846 | 120284313 + | NM_001039244 | Gm7120        | 4841  | 120281687 | 120281887 |
| 13 | 120276846 | 120284313 + | NM_001039244 | Gm7120        | 2873  | 120279719 | 120279919 |
| 13 | 120276846 | 120284313 + | NM_001039244 | Gm7120        | 1855  | 120278701 | 120278901 |
| 13 | 120276846 | 120284313 + | NM_001039244 | Gm7120        | -144  | 120276502 | 120276702 |
| 13 | 120277667 | 120284313 + | NM_001177666 | Gm7120        | 52    | 120277719 | 120277919 |
| 13 | 120277667 | 120284313 + | NM_001177666 | Gm7120        | 3378  | 120281045 | 120281245 |
| 13 | 120277667 | 120284313 + | NM_001177666 | Gm7120        | 4020  | 120281687 | 120281887 |
| 13 | 120277667 | 120284313 + | NM_001177666 | Gm7120        | 2052  | 120279719 | 120279919 |
| 13 | 120277667 | 120284313 + | NM_001177666 | Gm7120        | 1034  | 120278701 | 120278901 |
| 13 | 120277667 | 120284313 + | NM_001177666 | Gm7120        | -965  | 120276502 | 120276702 |
| 14 | 8650471   | 8784102 +   | NM_001081427 | Flnb          | 22063 | 8672534   | 8672734   |
| 14 | 8650471   | 8784102 +   | NM_001081427 | Flnb          | -8459 | 8641812   | 8642012   |
| 14 | 8650471   | 8784102 +   | NM_001081427 | Flnb          | 7056  | 8657527   | 8657727   |
| 14 | 8650471   | 8784102 +   | NM_001081427 | Flnb          | -9073 | 8641198   | 8641398   |
| 14 | 8650471   | 8784102 +   | NM_001081427 | Flnb          | -9878 | 8640393   | 8640593   |
| 14 | 8650471   | 8784102 +   | NM_134080    | Flnb          | 22063 | 8672534   | 8672734   |
| 14 | 8650471   | 8784102 +   | NM_134080    | Flnb          | -8459 | 8641812   | 8642012   |
| 14 | 8650471   | 8784102 +   | NM_134080    | Flnb          | 7056  | 8657527   | 8657727   |
| 14 | 8650471   | 8784102 +   | NM_134080    | Flnb          | -9073 | 8641198   | 8641398   |
| 14 | 8650471   | 8784102 +   | NM_134080    | Flnb          | -9878 | 8640393   | 8640593   |
| 14 | 8797704   | 8826697 -   | NM_007870    | Dnase1l3      | -8821 | 8835518   | 8835718   |
| 14 | 8835416   | 8889070 +   | NM_025341    | Abhd6         | 13437 | 8848853   | 8849053   |

|    |          |            |              |               |        |          |          |
|----|----------|------------|--------------|---------------|--------|----------|----------|
| 14 | 8835416  | 8889070 +  | NM_025341    | Abhd6         | 43956  | 8879372  | 8879572  |
| 14 | 8835416  | 8889070 +  | NM_025341    | Abhd6         | 25355  | 8860771  | 8860971  |
| 14 | 8835416  | 8889070 +  | NM_025341    | Abhd6         | 102    | 8835518  | 8835718  |
| 14 | 8835416  | 8889070 +  | NM_025341    | Abhd6         | 11394  | 8846810  | 8847010  |
| 14 | 8912827  | 8924361 +  | NM_025938    | Rpp14         | -2676  | 8909951  | 8910151  |
| 14 | 8930727  | 8997626 +  | NM_145458    | Pxk           | 10729  | 8941456  | 8941656  |
| 14 | 8930727  | 8997626 +  | NM_178279    | Pxk           | 10729  | 8941456  | 8941656  |
| 14 | 9058025  | 9091354 -  | NM_001161667 | Acox2         | -6307  | 9097661  | 9097861  |
| 14 | 9058025  | 9091534 -  | NM_053115    | Acox2         | -6127  | 9097661  | 9097861  |
| 14 | 9181462  | 9211278 -  | NM_146050    | Oit1          | 11382  | 9199696  | 9199896  |
| 14 | 9181462  | 9211278 -  | NM_146050    | Oit1          | 2018   | 9209060  | 9209260  |
| 14 | 9181462  | 9211278 -  | NM_146050    | Oit1          | 12717  | 9198361  | 9198561  |
| 14 | 9263686  | 9498805 -  | NM_028934    | 4930452B06Rik | 29719  | 9468886  | 9469086  |
| 14 | 10382608 | 11994550 - | NM_001308285 | Fhit          | 503958 | 11490392 | 11490592 |
| 14 | 10382608 | 11994550 - | NM_001308285 | Fhit          | 742534 | 11251816 | 11252016 |
| 14 | 10382608 | 11994550 - | NM_001308285 | Fhit          | 592809 | 11401541 | 11401741 |
| 14 | 10382608 | 11994550 - | NM_001308285 | Fhit          | 554942 | 11439408 | 11439608 |
| 14 | 10382608 | 11994550 - | NM_001308285 | Fhit          | 694404 | 11299946 | 11300146 |
| 14 | 10382608 | 11994550 - | NM_001308285 | Fhit          | 904513 | 11089837 | 11090037 |
| 14 | 10382608 | 11285973 - | NM_001308286 | Fhit          | 33957  | 11251816 | 11252016 |
| 14 | 10382608 | 11285973 - | NM_001308286 | Fhit          | 195936 | 11089837 | 11090037 |
| 14 | 10382608 | 11994550 - | NM_010210    | Fhit          | 503958 | 11490392 | 11490592 |
| 14 | 10382608 | 11994550 - | NM_010210    | Fhit          | 742534 | 11251816 | 11252016 |
| 14 | 10382608 | 11994550 - | NM_010210    | Fhit          | 592809 | 11401541 | 11401741 |
| 14 | 10382608 | 11994550 - | NM_010210    | Fhit          | 554942 | 11439408 | 11439608 |
| 14 | 10382608 | 11994550 - | NM_010210    | Fhit          | 694404 | 11299946 | 11300146 |
| 14 | 10382608 | 11994550 - | NM_010210    | Fhit          | 904513 | 11089837 | 11090037 |
| 14 | 12386067 | 13074554 + | NM_008981    | Ptprg         | 313588 | 12699655 | 12699855 |
| 14 | 12386067 | 13074554 + | NM_008981    | Ptprg         | 598499 | 12984566 | 12984766 |
| 14 | 12386067 | 13074554 + | NM_008981    | Ptprg         | 389274 | 12775341 | 12775541 |

|    |          |            |              |         |        |          |          |
|----|----------|------------|--------------|---------|--------|----------|----------|
| 14 | 12386067 | 13074554 + | NM_008981    | Ptprg   | 84283  | 12470350 | 12470550 |
| 14 | 12386067 | 13074554 + | NM_008981    | Ptprg   | 194551 | 12580618 | 12580818 |
| 14 | 12386067 | 13074554 + | NM_008981    | Ptprg   | 312801 | 12698868 | 12699068 |
| 14 | 12386067 | 13074554 + | NM_008981    | Ptprg   | 103965 | 12490032 | 12490232 |
| 14 | 12386067 | 13074554 + | NM_008981    | Ptprg   | 25127  | 12411194 | 12411394 |
| 14 | 12386067 | 13074554 + | NM_008981    | Ptprg   | 55553  | 12441620 | 12441820 |
| 14 | 15535539 | 15632458 + | NM_001033270 | Slc4a7  | 86827  | 15622366 | 15622566 |
| 14 | 17071173 | 17082323 - | NM_027695    | Oxsm    | 6593   | 17075530 | 17075730 |
| 14 | 17081828 | 17144441 + | NM_021504    | Ngly1   | -6098  | 17075530 | 17075730 |
| 14 | 17197720 | 17263302 + | NM_009409    | Top2b   | 19685  | 17217405 | 17217605 |
| 14 | 17197720 | 17263302 + | NM_009409    | Top2b   | 1377   | 17199097 | 17199297 |
| 14 | 18493474 | 18870603 + | NM_001113417 | Thrb    | 262464 | 18755938 | 18756138 |
| 14 | 18493474 | 18870603 + | NM_001113417 | Thrb    | 296004 | 18789478 | 18789678 |
| 14 | 18493474 | 18870603 + | NM_001113417 | Thrb    | 123395 | 18616869 | 18617069 |
| 14 | 18493474 | 18870603 + | NM_001113417 | Thrb    | 184982 | 18678456 | 18678656 |
| 14 | 18493474 | 18870603 + | NM_001113417 | Thrb    | 39422  | 18532896 | 18533096 |
| 14 | 19036570 | 19071621 - | NM_011584    | Nr1d2   | -5133  | 19076754 | 19076954 |
| 14 | 19036570 | 19071621 - | NM_011584    | Nr1d2   | 2000   | 19069421 | 19069621 |
| 14 | 20894858 | 20902395 - | NM_026209    | Saysd1  | -8443  | 20910838 | 20911038 |
| 14 | 20959280 | 21001005 - | NM_021542    | Kcnk5   | 3806   | 20996999 | 20997199 |
| 14 | 20959280 | 21001005 - | NM_021542    | Kcnk5   | -9683  | 21010688 | 21010888 |
| 14 | 20959280 | 21001005 - | NM_021542    | Kcnk5   | 32317  | 20968488 | 20968688 |
| 14 | 21478170 | 21487577 - | NM_001310431 | Synpo2l | -7399  | 21494976 | 21495176 |
| 14 | 21478170 | 21487577 - | NM_175132    | Synpo2l | -7399  | 21494976 | 21495176 |
| 14 | 21493543 | 21514073 + | NM_001168273 | Sec24c  | 1433   | 21494976 | 21495176 |
| 14 | 21493543 | 21514073 + | NM_172596    | Sec24c  | 1433   | 21494976 | 21495176 |
| 14 | 21554095 | 21613311 - | NM_001039138 | Camk2g  | 8230   | 21604881 | 21605081 |
| 14 | 21554095 | 21613311 - | NM_001039139 | Camk2g  | 8230   | 21604881 | 21605081 |
| 14 | 21554095 | 21613311 - | NM_178597    | Camk2g  | 8230   | 21604881 | 21605081 |
| 14 | 21852964 | 21871665 - | NM_018829    | Ap3m1   | -1251  | 21872916 | 21873116 |

|    |          |            |              |               |        |          |          |
|----|----------|------------|--------------|---------------|--------|----------|----------|
| 14 | 21871796 | 22267792 + | NM_134079    | Adk           | 326327 | 22198123 | 22198323 |
| 14 | 21871796 | 22267792 + | NM_134079    | Adk           | 1120   | 21872916 | 21873116 |
| 14 | 21895374 | 22267792 + | NM_001243041 | Adk           | 302749 | 22198123 | 22198323 |
| 14 | 22318992 | 22491701 + | NM_001205241 | Kat6b         | 60902  | 22379894 | 22380094 |
| 14 | 22318992 | 22491701 + | NM_001205241 | Kat6b         | 61760  | 22380752 | 22380952 |
| 14 | 22318992 | 22491701 + | NM_001205241 | Kat6b         | -1064  | 22317728 | 22317928 |
| 14 | 22319007 | 22491701 + | NM_017479    | Kat6b         | 60887  | 22379894 | 22380094 |
| 14 | 22319007 | 22491701 + | NM_017479    | Kat6b         | 61745  | 22380752 | 22380952 |
| 14 | 22319007 | 22491701 + | NM_017479    | Kat6b         | -1079  | 22317728 | 22317928 |
| 14 | 22552618 | 22567845 - | NM_001007268 | Dusp13        | -5037  | 22572882 | 22573082 |
| 14 | 22569753 | 22617948 + | NM_026283    | Samd8         | 3129   | 22572882 | 22573082 |
| 14 | 22569753 | 22617948 + | NM_026283    | Samd8         | 15608  | 22585361 | 22585561 |
| 14 | 22650783 | 22665102 + | NM_011695    | Vdac2         | -5104  | 22645479 | 22645679 |
| 14 | 22650783 | 22665102 + | NM_011695    | Vdac2         | -9294  | 22641289 | 22641489 |
| 14 | 22665083 | 22668133 - | NM_026965    | Comtd1        | 1818   | 22666115 | 22666315 |
| 14 | 22803184 | 22808824 - | NM_145459    | Zfp503        | -1638  | 22810462 | 22810662 |
| 14 | 22838934 | 23875311 + | NM_028275    | 1700112E06Rik | 22410  | 22861344 | 22861544 |
| 14 | 24117916 | 24823428 - | NM_001253358 | Kcnma1        | 218019 | 24605209 | 24605409 |
| 14 | 24117916 | 24823428 - | NM_001253359 | Kcnma1        | 218019 | 24605209 | 24605409 |
| 14 | 24117916 | 24823428 - | NM_001253360 | Kcnma1        | 218019 | 24605209 | 24605409 |
| 14 | 24117916 | 24823428 - | NM_001253361 | Kcnma1        | 218019 | 24605209 | 24605409 |
| 14 | 24117916 | 24823428 - | NM_001253362 | Kcnma1        | 218019 | 24605209 | 24605409 |
| 14 | 24117916 | 24823428 - | NM_001253363 | Kcnma1        | 218019 | 24605209 | 24605409 |
| 14 | 24117916 | 24823428 - | NM_001253365 | Kcnma1        | 218019 | 24605209 | 24605409 |
| 14 | 24117916 | 24823428 - | NM_001253366 | Kcnma1        | 218019 | 24605209 | 24605409 |
| 14 | 24117916 | 24823428 - | NM_001253367 | Kcnma1        | 218019 | 24605209 | 24605409 |
| 14 | 24117916 | 24823428 - | NM_001253369 | Kcnma1        | 218019 | 24605209 | 24605409 |
| 14 | 24117916 | 24823428 - | NM_001253371 | Kcnma1        | 218019 | 24605209 | 24605409 |
| 14 | 24117916 | 24823428 - | NM_001253372 | Kcnma1        | 218019 | 24605209 | 24605409 |
| 14 | 24117916 | 24823428 - | NM_001253373 | Kcnma1        | 218019 | 24605209 | 24605409 |

|    |          |            |              |         |        |          |          |
|----|----------|------------|--------------|---------|--------|----------|----------|
| 14 | 24117916 | 24823428 - | NM_001253374 | Kcnma1  | 218019 | 24605209 | 24605409 |
| 14 | 24117916 | 24823428 - | NM_001253377 | Kcnma1  | 218019 | 24605209 | 24605409 |
| 14 | 24117916 | 24823428 - | NM_001253378 | Kcnma1  | 218019 | 24605209 | 24605409 |
| 14 | 24117916 | 24823428 - | NM_010610    | Kcnma1  | 218019 | 24605209 | 24605409 |
| 14 | 24125834 | 24823428 - | NM_001253364 | Kcnma1  | 218019 | 24605209 | 24605409 |
| 14 | 24125834 | 24823428 - | NM_001253368 | Kcnma1  | 218019 | 24605209 | 24605409 |
| 14 | 24125834 | 24823428 - | NM_001253370 | Kcnma1  | 218019 | 24605209 | 24605409 |
| 14 | 24125834 | 24823428 - | NM_001253375 | Kcnma1  | 218019 | 24605209 | 24605409 |
| 14 | 24125834 | 24823428 - | NM_001253376 | Kcnma1  | 218019 | 24605209 | 24605409 |
| 14 | 26278671 | 26486230 + | NM_001310666 | Zmiz1   | -4905  | 26273566 | 26273766 |
| 14 | 26278671 | 26486230 + | NM_001310666 | Zmiz1   | 135721 | 26414392 | 26414592 |
| 14 | 26278671 | 26486230 + | NM_001310666 | Zmiz1   | 158059 | 26436730 | 26436930 |
| 14 | 26278671 | 26486230 + | NM_001310666 | Zmiz1   | 48137  | 26326808 | 26327008 |
| 14 | 26278671 | 26486230 + | NM_001310666 | Zmiz1   | -7768  | 26270703 | 26270903 |
| 14 | 26278671 | 26486230 + | NM_183208    | Zmiz1   | -4905  | 26273566 | 26273766 |
| 14 | 26278671 | 26486230 + | NM_183208    | Zmiz1   | 135721 | 26414392 | 26414592 |
| 14 | 26278671 | 26486230 + | NM_183208    | Zmiz1   | 158059 | 26436730 | 26436930 |
| 14 | 26278671 | 26486230 + | NM_183208    | Zmiz1   | 48137  | 26326808 | 26327008 |
| 14 | 26278671 | 26486230 + | NM_183208    | Zmiz1   | -7768  | 26270703 | 26270903 |
| 14 | 26422999 | 26425123 + | NM_001309430 | Israa   | -8407  | 26414392 | 26414592 |
| 14 | 26531126 | 26588343 - | NM_001101433 | Zcchc24 | 14060  | 26574083 | 26574283 |
| 14 | 26531126 | 26588343 - | NM_001101433 | Zcchc24 | 29534  | 26558609 | 26558809 |
| 14 | 26661641 | 26706291 + | NM_013469    | Anxa11  | 2318   | 26663959 | 26664159 |
| 14 | 26661641 | 26706291 + | NM_013469    | Anxa11  | 5568   | 26667209 | 26667409 |
| 14 | 27393344 | 27453809 + | NM_001285466 | Dennd6a | 1703   | 27395047 | 27395247 |
| 14 | 27393344 | 27453809 + | NM_001285466 | Dennd6a | 4849   | 27398193 | 27398393 |
| 14 | 27393344 | 27453809 + | NM_001285467 | Dennd6a | 1703   | 27395047 | 27395247 |
| 14 | 27393344 | 27453809 + | NM_001285467 | Dennd6a | 4849   | 27398193 | 27398393 |
| 14 | 27399036 | 27453809 + | NM_001134465 | Dennd6a | -3789  | 27395047 | 27395247 |
| 14 | 27399036 | 27453809 + | NM_001134465 | Dennd6a | -643   | 27398193 | 27398393 |

|    |          |            |              |         |        |          |          |
|----|----------|------------|--------------|---------|--------|----------|----------|
| 14 | 27399036 | 27447896 + | NM_145969    | Dennd6a | -3789  | 27395047 | 27395247 |
| 14 | 27399036 | 27447896 + | NM_145969    | Dennd6a | -643   | 27398193 | 27398393 |
| 14 | 27457683 | 27476745 + | NM_007479    | Arf4    | 4904   | 27462587 | 27462787 |
| 14 | 27732174 | 27783738 - | NM_145221    | Appl1   | 46731  | 27736807 | 27737007 |
| 14 | 27852187 | 27920473 + | NM_134437    | Il17rd  | 13908  | 27866095 | 27866295 |
| 14 | 27957179 | 28217098 + | NM_001289686 | Arhgef3 | 205940 | 28163119 | 28163319 |
| 14 | 27957179 | 28217098 + | NM_001289686 | Arhgef3 | 40031  | 27997210 | 27997410 |
| 14 | 27957179 | 28217098 + | NM_001289686 | Arhgef3 | 196593 | 28153772 | 28153972 |
| 14 | 28051196 | 28217098 + | NM_027871    | Arhgef3 | 111923 | 28163119 | 28163319 |
| 14 | 28051196 | 28217098 + | NM_027871    | Arhgef3 | 102576 | 28153772 | 28153972 |
| 14 | 28149223 | 28217098 + | NM_001289687 | Arhgef3 | 13896  | 28163119 | 28163319 |
| 14 | 28149223 | 28217098 + | NM_001289687 | Arhgef3 | 4549   | 28153772 | 28153972 |
| 14 | 28435628 | 29291724 + | NM_177814    | Erc2    | 45124  | 28480752 | 28480952 |
| 14 | 28435628 | 29291724 + | NM_177814    | Erc2    | 776756 | 29212384 | 29212584 |
| 14 | 28435628 | 29291724 + | NM_177814    | Erc2    | 315012 | 28750640 | 28750840 |
| 14 | 29318659 | 29338702 + | NM_009524    | Wnt5a   | 15039  | 29333698 | 29333898 |
| 14 | 29324591 | 29338702 + | NM_001256224 | Wnt5a   | 9107   | 29333698 | 29333898 |
| 14 | 30809354 | 30822083 - | NM_019583    | Il17rb  | -1280  | 30823363 | 30823563 |
| 14 | 30809354 | 30822083 - | NM_019583    | Il17rb  | -378   | 30822461 | 30822661 |
| 14 | 30822186 | 30853653 + | NM_001136240 | Chdh    | 1177   | 30823363 | 30823563 |
| 14 | 30822186 | 30853653 + | NM_001136240 | Chdh    | 15472  | 30837658 | 30837858 |
| 14 | 30822186 | 30853653 + | NM_001136240 | Chdh    | 275    | 30822461 | 30822661 |
| 14 | 30834489 | 30853653 + | NM_172264    | Chdh    | 3169   | 30837658 | 30837858 |
| 14 | 30835819 | 30853653 + | NM_175343    | Chdh    | 1839   | 30837658 | 30837858 |
| 14 | 30853130 | 31166673 - | NM_001083616 | Cacna1d | 220804 | 30945669 | 30945869 |
| 14 | 30853130 | 31166673 - | NM_001302637 | Cacna1d | 220804 | 30945669 | 30945869 |
| 14 | 30853130 | 31304343 - | NM_028981    | Cacna1d | 358474 | 30945669 | 30945869 |
| 14 | 30853130 | 31304343 - | NM_028981    | Cacna1d | 17664  | 31286479 | 31286679 |
| 14 | 31292751 | 31340243 + | NM_133761    | Dcp1a   | -6072  | 31286479 | 31286679 |
| 14 | 31362317 | 31387912 + | NM_009388    | Tkt     | -807   | 31361310 | 31361510 |

|    |          |            |              |               |       |          |          |
|----|----------|------------|--------------|---------------|-------|----------|----------|
| 14 | 31362317 | 31387912 + | NM_009388    | Tkt           | 1212  | 31363529 | 31363729 |
| 14 | 31362317 | 31387912 + | NM_009388    | Tkt           | -149  | 31361968 | 31362168 |
| 14 | 31408540 | 31423497 - | NM_001310682 | Prkcd         | -1723 | 31425220 | 31425420 |
| 14 | 31408540 | 31439395 - | NM_011103    | Prkcd         | 2493  | 31436702 | 31436902 |
| 14 | 31408540 | 31439395 - | NM_011103    | Prkcd         | 13975 | 31425220 | 31425420 |
| 14 | 31638780 | 31690397 + | NM_028839    | Tmem110       | 36155 | 31674935 | 31675135 |
| 14 | 31699662 | 31715173 + | NM_001159299 | Itih4         | -813  | 31698649 | 31698849 |
| 14 | 31699662 | 31715173 + | NM_001289632 | Itih4         | -813  | 31698649 | 31698849 |
| 14 | 31699662 | 31715173 + | NM_001289633 | Itih4         | -813  | 31698649 | 31698849 |
| 14 | 31699662 | 31715173 + | NM_018746    | Itih4         | -813  | 31698649 | 31698849 |
| 14 | 31813012 | 31814853 - | NM_026911    | Spcs1         | -6070 | 31820923 | 31821123 |
| 14 | 31814579 | 31825628 + | NM_001165930 | Glt8d1        | 6344  | 31820923 | 31821123 |
| 14 | 31814619 | 31825628 + | NM_029626    | Glt8d1        | 6304  | 31820923 | 31821123 |
| 14 | 31952203 | 31981828 - | NM_138672    | Stab1         | 8191  | 31973437 | 31973637 |
| 14 | 32187150 | 32249220 - | NM_011894    | Sh3bp5        | 31733 | 32217287 | 32217487 |
| 14 | 32420412 | 32454152 - | NM_019975    | Hacl1         | -7839 | 32461991 | 32462191 |
| 14 | 32420412 | 32454152 - | NM_019975    | Hacl1         | -4234 | 32458386 | 32458586 |
| 14 | 32454243 | 32481384 + | NM_025295    | Btd           | 7748  | 32461991 | 32462191 |
| 14 | 32454243 | 32481384 + | NM_025295    | Btd           | 4143  | 32458386 | 32458586 |
| 14 | 32893703 | 32898879 - | NM_001047433 | Dph3          | -3210 | 32902089 | 32902289 |
| 14 | 32893703 | 32898879 - | NM_001284346 | Dph3          | -3210 | 32902089 | 32902289 |
| 14 | 32893703 | 32898879 - | NM_172254    | Dph3          | -3210 | 32902089 | 32902289 |
| 14 | 32893703 | 32898879 - | NR_104303    | Dph3          | -3210 | 32902089 | 32902289 |
| 14 | 32893703 | 32898879 - | NR_104304    | Dph3          | -3210 | 32902089 | 32902289 |
| 14 | 32893703 | 32898473 - | NR_104305    | Dph3          | -3616 | 32902089 | 32902289 |
| 14 | 32898914 | 32916390 + | NM_145460    | Oxnad1        | 3175  | 32902089 | 32902289 |
| 14 | 33326707 | 33394176 + | NM_001081221 | Ercc6         | 22784 | 33349491 | 33349691 |
| 14 | 33599149 | 33631155 + | NM_001163616 | 1810011H11Rik | -4692 | 33594257 | 33594457 |
| 14 | 34030009 | 34183123 + | NM_153800    | Arhgap22      | -2160 | 34027649 | 34027849 |
| 14 | 34030009 | 34183123 + | NM_153800    | Arhgap22      | 34489 | 34064498 | 34064698 |



|    |          |            |              |               |       |          |          |
|----|----------|------------|--------------|---------------|-------|----------|----------|
| 14 | 34191084 | 34260345 - | NM_016700    | Mapk8         | 4357  | 34255788 | 34255988 |
| 14 | 34191084 | 34260345 - | NM_016700    | Mapk8         | 15644 | 34244501 | 34244701 |
| 14 | 34191085 | 34260345 - | NM_001310453 | Mapk8         | 4357  | 34255788 | 34255988 |
| 14 | 34191085 | 34260345 - | NM_001310453 | Mapk8         | 15644 | 34244501 | 34244701 |
| 14 | 34191085 | 34260345 - | NM_001310454 | Mapk8         | 4357  | 34255788 | 34255988 |
| 14 | 34191085 | 34260345 - | NM_001310454 | Mapk8         | 15644 | 34244501 | 34244701 |
| 14 | 34780256 | 34791951 - | NM_001013777 | Zfp488        | 3025  | 34788726 | 34788926 |
| 14 | 34854264 | 34860168 + | NM_001034880 | Gm5460        | -8953 | 34845111 | 34845311 |
| 14 | 34854264 | 34860168 + | NM_001034880 | Gm5460        | 1730  | 34855994 | 34856194 |
| 14 | 34864316 | 34915941 - | NM_001251843 | A630023A22Rik | 25276 | 34890465 | 34890665 |
| 14 | 34899165 | 34913755 + | NM_001281845 | Anxa8         | -8500 | 34890465 | 34890665 |
| 14 | 34899165 | 34913755 + | NM_013473    | Anxa8         | -8500 | 34890465 | 34890665 |
| 14 | 35050221 | 35123690 - | NM_029389    | Fam35a        | 13099 | 35110391 | 35110591 |
| 14 | 35050221 | 35123690 - | NM_029389    | Fam35a        | 7549  | 35115941 | 35116141 |
| 14 | 35050221 | 35123690 - | NM_029389    | Fam35a        | 36127 | 35087363 | 35087563 |
| 14 | 35123913 | 35158220 + | NM_008133    | Glud1         | 27059 | 35150972 | 35151172 |
| 14 | 35123913 | 35158220 + | NM_008133    | Glud1         | -7772 | 35115941 | 35116141 |
| 14 | 35158241 | 35158845 + | NR_027380    | Gm3219        | -7069 | 35150972 | 35151172 |
| 14 | 35165068 | 35168580 - | NM_183278    | Fam25c        | -6818 | 35175398 | 35175598 |
| 14 | 35224254 | 35315733 - | NM_009758    | Bmpr1a        | -3050 | 35318783 | 35318983 |
| 14 | 35339885 | 35401868 - | NM_001039071 | Ldb3          | 53026 | 35348642 | 35348842 |
| 14 | 35339885 | 35401868 - | NM_001039071 | Ldb3          | 2987  | 35398681 | 35398881 |
| 14 | 35339885 | 35401868 - | NM_001039071 | Ldb3          | 359   | 35401309 | 35401509 |
| 14 | 35339885 | 35401868 - | NM_001039071 | Ldb3          | 52456 | 35349212 | 35349412 |
| 14 | 35339885 | 35401868 - | NM_001039072 | Ldb3          | 53026 | 35348642 | 35348842 |
| 14 | 35339885 | 35401868 - | NM_001039072 | Ldb3          | 2987  | 35398681 | 35398881 |
| 14 | 35339885 | 35401868 - | NM_001039072 | Ldb3          | 359   | 35401309 | 35401509 |
| 14 | 35339885 | 35401868 - | NM_001039072 | Ldb3          | 52456 | 35349212 | 35349412 |
| 14 | 35339885 | 35401868 - | NM_001039073 | Ldb3          | 53026 | 35348642 | 35348842 |
| 14 | 35339885 | 35401868 - | NM_001039073 | Ldb3          | 2987  | 35398681 | 35398881 |

|    |          |            |              |         |       |          |          |
|----|----------|------------|--------------|---------|-------|----------|----------|
| 14 | 35339885 | 35401868 - | NM_001039073 | Ldb3    | 359   | 35401309 | 35401509 |
| 14 | 35339885 | 35401868 - | NM_001039073 | Ldb3    | 52456 | 35349212 | 35349412 |
| 14 | 35339885 | 35401794 - | NM_001039074 | Ldb3    | 52952 | 35348642 | 35348842 |
| 14 | 35339885 | 35401794 - | NM_001039074 | Ldb3    | 2913  | 35398681 | 35398881 |
| 14 | 35339885 | 35401794 - | NM_001039074 | Ldb3    | 285   | 35401309 | 35401509 |
| 14 | 35339885 | 35401794 - | NM_001039074 | Ldb3    | 52382 | 35349212 | 35349412 |
| 14 | 35339885 | 35401868 - | NM_011918    | Ldb3    | 53026 | 35348642 | 35348842 |
| 14 | 35339885 | 35401868 - | NM_011918    | Ldb3    | 2987  | 35398681 | 35398881 |
| 14 | 35339885 | 35401868 - | NM_011918    | Ldb3    | 359   | 35401309 | 35401509 |
| 14 | 35339885 | 35401868 - | NM_011918    | Ldb3    | 52456 | 35349212 | 35349412 |
| 14 | 35374440 | 35401868 - | NM_001039075 | Ldb3    | 2987  | 35398681 | 35398881 |
| 14 | 35374440 | 35401868 - | NM_001039075 | Ldb3    | 359   | 35401309 | 35401509 |
| 14 | 35374440 | 35401868 - | NM_001039076 | Ldb3    | 2987  | 35398681 | 35398881 |
| 14 | 35374440 | 35401868 - | NM_001039076 | Ldb3    | 359   | 35401309 | 35401509 |
| 14 | 37688122 | 37781951 - | NM_027045    | Ccser2  | 35802 | 37745949 | 37746149 |
| 14 | 37688122 | 37748755 - | NM_028407    | Ccser2  | 2606  | 37745949 | 37746149 |
| 14 | 41719733 | 41780097 - | NM_145928    | Tspan14 | 39435 | 41740462 | 41740662 |
| 14 | 41719733 | 41780097 - | NM_145928    | Tspan14 | 19024 | 41760873 | 41761073 |
| 14 | 45754123 | 45839101 - | NM_001310534 | Txndc16 | 84548 | 45754353 | 45754553 |
| 14 | 45754123 | 45839101 - | NM_172597    | Txndc16 | 84548 | 45754353 | 45754553 |
| 14 | 45902762 | 45938248 - | NM_015774    | Ero1l   | -3138 | 45941386 | 45941586 |
| 14 | 45949499 | 45968747 + | NM_025959    | Psmc6   | -7913 | 45941386 | 45941586 |
| 14 | 45949499 | 45968747 + | NM_025959    | Psmc6   | 2     | 45949501 | 45949701 |
| 14 | 45996096 | 46008472 - | NM_019425    | Gnpnat1 | 635   | 46007637 | 46007837 |
| 14 | 45996096 | 46008472 - | NM_019425    | Gnpnat1 | -313  | 46008785 | 46008985 |
| 14 | 46212846 | 46277819 - | NM_001039106 | Ddhd1   | 24050 | 46253569 | 46253769 |
| 14 | 46212846 | 46277819 - | NM_001042719 | Ddhd1   | 24050 | 46253569 | 46253769 |
| 14 | 46212846 | 46277819 - | NM_001284399 | Ddhd1   | 24050 | 46253569 | 46253769 |
| 14 | 46212846 | 46277819 - | NM_176845    | Ddhd1   | 24050 | 46253569 | 46253769 |
| 14 | 47003196 | 47010275 - | NM_007554    | Bmp4    | 4201  | 47005874 | 47006074 |

|    |          |            |              |           |       |          |          |
|----|----------|------------|--------------|-----------|-------|----------|----------|
| 14 | 47395242 | 47408033 - | NM_009919    | Cnih1     | -5983 | 47414016 | 47414216 |
| 14 | 47395242 | 47408033 - | NM_009919    | Cnih1     | -1979 | 47410012 | 47410212 |
| 14 | 47502640 | 47725493 + | NM_001037221 | Samd4     | 42361 | 47545001 | 47545201 |
| 14 | 47502640 | 47725493 + | NM_028966    | Samd4     | 42361 | 47545001 | 47545201 |
| 14 | 47717354 | 47735837 - | NR_126579    | Gm10371   | 0     | 47735758 | 47735958 |
| 14 | 47917989 | 47942767 + | NM_178684    | Mapk1ip1l | -1711 | 47916078 | 47916278 |
| 14 | 47993535 | 48005843 + | NM_001145953 | Lgals3    | -8744 | 47984591 | 47984791 |
| 14 | 47993535 | 48005843 + | NM_001145953 | Lgals3    | -6647 | 47986688 | 47986888 |
| 14 | 47993535 | 48005843 + | NM_001145953 | Lgals3    | -8373 | 47984962 | 47985162 |
| 14 | 47993535 | 48005843 + | NM_010705    | Lgals3    | -8744 | 47984591 | 47984791 |
| 14 | 47993535 | 48005843 + | NM_010705    | Lgals3    | -6647 | 47986688 | 47986888 |
| 14 | 47993535 | 48005843 + | NM_010705    | Lgals3    | -8373 | 47984962 | 47985162 |
| 14 | 48007454 | 48038083 - | NM_144553    | Dlgap5    | 6838  | 48031045 | 48031245 |
| 14 | 48092236 | 48151638 + | NM_001146085 | Fbxo34    | 55362 | 48147598 | 48147798 |
| 14 | 48092236 | 48151638 + | NM_001146085 | Fbxo34    | 24973 | 48117209 | 48117409 |
| 14 | 48092236 | 48151638 + | NM_001146086 | Fbxo34    | 55362 | 48147598 | 48147798 |
| 14 | 48092236 | 48151638 + | NM_001146086 | Fbxo34    | 24973 | 48117209 | 48117409 |
| 14 | 48092236 | 48151638 + | NM_030236    | Fbxo34    | 55362 | 48147598 | 48147798 |
| 14 | 48092236 | 48151638 + | NM_030236    | Fbxo34    | 24973 | 48117209 | 48117409 |
| 14 | 48092236 | 48151638 + | NR_027414    | Fbxo34    | 55362 | 48147598 | 48147798 |
| 14 | 48092236 | 48151638 + | NR_027414    | Fbxo34    | 24973 | 48117209 | 48117409 |
| 14 | 49791902 | 49810707 + | NM_001081430 | Naa30     | -657  | 49791045 | 49791245 |
| 14 | 51443736 | 51490230 - | NM_009351    | Tep1      | 24932 | 51465098 | 51465298 |
| 14 | 51511064 | 51512931 - | NM_001166651 | Klhl33    | -2777 | 51515708 | 51515908 |
| 14 | 51710752 | 51721685 + | NM_001161731 | Ang       | -1371 | 51709181 | 51709381 |
| 14 | 51710752 | 51725827 + | NM_021472    | Rnase4    | -1371 | 51709181 | 51709381 |
| 14 | 51715675 | 51721685 + | NM_007447    | Ang       | -6294 | 51709181 | 51709381 |
| 14 | 51715675 | 51725827 + | NM_201239    | Rnase4    | -6294 | 51709181 | 51709381 |
| 14 | 51764677 | 51766443 - | NM_011271    | Rnase1    | -3034 | 51769477 | 51769677 |
| 14 | 52604508 | 52625923 + | NM_001145921 | Arhgef40  | 21090 | 52625598 | 52625798 |

|    |          |            |              |          |       |          |          |
|----|----------|------------|--------------|----------|-------|----------|----------|
| 14 | 52604508 | 52625923 + | NM_001145922 | Arhgef40 | 21090 | 52625598 | 52625798 |
| 14 | 52604508 | 52625923 + | NM_198249    | Arhgef40 | 21090 | 52625598 | 52625798 |
| 14 | 52625750 | 52634234 - | NM_001253695 | Zfp219   | 8436  | 52625598 | 52625798 |
| 14 | 52625752 | 52640409 - | NM_027248    | Zfp219   | 14611 | 52625598 | 52625798 |
| 14 | 52625757 | 52640409 - | NM_001253696 | Zfp219   | 14611 | 52625598 | 52625798 |
| 14 | 52625761 | 52639389 - | NM_001253694 | Zfp219   | 13591 | 52625598 | 52625798 |
| 14 | 52881434 | 52899071 - | NM_172601    | Rab2b    | 0     | 52898899 | 52899099 |
| 14 | 52898821 | 52915185 + | NM_023434    | Tox4     | 78    | 52898899 | 52899099 |
| 14 | 54989126 | 55036517 - | NM_001253679 | Slc7a7   | 34552 | 55001765 | 55001965 |
| 14 | 54989126 | 55036517 - | NM_001253679 | Slc7a7   | 30310 | 55006007 | 55006207 |
| 14 | 54989126 | 55036517 - | NM_001253679 | Slc7a7   | 7214  | 55029103 | 55029303 |
| 14 | 54989126 | 55036517 - | NM_001253679 | Slc7a7   | 32389 | 55003928 | 55004128 |
| 14 | 54989126 | 55036517 - | NM_001253679 | Slc7a7   | 36780 | 54999537 | 54999737 |
| 14 | 54989126 | 55028310 - | NM_001253680 | Slc7a7   | 26345 | 55001765 | 55001965 |
| 14 | 54989126 | 55028310 - | NM_001253680 | Slc7a7   | 22103 | 55006007 | 55006207 |
| 14 | 54989126 | 55028310 - | NM_001253680 | Slc7a7   | -793  | 55029103 | 55029303 |
| 14 | 54989126 | 55028310 - | NM_001253680 | Slc7a7   | 24182 | 55003928 | 55004128 |
| 14 | 54989126 | 55028310 - | NM_001253680 | Slc7a7   | 28573 | 54999537 | 54999737 |
| 14 | 54989126 | 55036540 - | NM_011405    | Slc7a7   | 34575 | 55001765 | 55001965 |
| 14 | 54989126 | 55036540 - | NM_011405    | Slc7a7   | 30333 | 55006007 | 55006207 |
| 14 | 54989126 | 55036540 - | NM_011405    | Slc7a7   | 7237  | 55029103 | 55029303 |
| 14 | 54989126 | 55036540 - | NM_011405    | Slc7a7   | 32412 | 55003928 | 55004128 |
| 14 | 54989126 | 55036540 - | NM_011405    | Slc7a7   | 36803 | 54999537 | 54999737 |
| 14 | 55082984 | 55089129 + | NM_022993    | Lrp10    | -81   | 55082703 | 55082903 |
| 14 | 55126019 | 55136308 - | NM_013768    | Prmt5    | -213  | 55136521 | 55136721 |
| 14 | 55260998 | 55272539 - | NM_001085472 | Acin1    | 0     | 55272352 | 55272552 |
| 14 | 55260998 | 55305769 - | NM_001085473 | Acin1    | 9902  | 55295667 | 55295867 |
| 14 | 55260998 | 55305769 - | NM_001085473 | Acin1    | 615   | 55304954 | 55305154 |
| 14 | 55260998 | 55305769 - | NM_001085473 | Acin1    | 33217 | 55272352 | 55272552 |
| 14 | 55260998 | 55272523 - | NM_001242605 | Acin1    | 0     | 55272352 | 55272552 |

|    |          |            |              |               |       |          |          |
|----|----------|------------|--------------|---------------|-------|----------|----------|
| 14 | 55260998 | 55272523 - | NM_001242606 | Acin1         | 0     | 55272352 | 55272552 |
| 14 | 55260998 | 55272523 - | NM_019567    | Acin1         | 0     | 55272352 | 55272552 |
| 14 | 55260998 | 55305769 - | NM_023190    | Acin1         | 9902  | 55295667 | 55295867 |
| 14 | 55260998 | 55305769 - | NM_023190    | Acin1         | 615   | 55304954 | 55305154 |
| 14 | 55260998 | 55305769 - | NM_023190    | Acin1         | 33217 | 55272352 | 55272552 |
| 14 | 55269348 | 55273938 + | NR_038053    | 4930579G18Rik | 3004  | 55272352 | 55272552 |
| 14 | 55305008 | 55309580 + | NM_021437    | 1700123O20Rik | -9141 | 55295667 | 55295867 |
| 14 | 55305008 | 55309580 + | NM_021437    | 1700123O20Rik | 0     | 55304954 | 55305154 |
| 14 | 55329200 | 55331012 - | NM_207131    | Cebpe         | -2739 | 55333751 | 55333951 |
| 14 | 55341052 | 55400724 - | NM_016972    | Slc7a8        | 27024 | 55373500 | 55373700 |
| 14 | 55341052 | 55400724 - | NM_016972    | Slc7a8        | 3680  | 55396844 | 55397044 |
| 14 | 55341052 | 55400724 - | NM_016972    | Slc7a8        | 4811  | 55395713 | 55395913 |
| 14 | 55341052 | 55400724 - | NM_016972    | Slc7a8        | 35529 | 55364995 | 55365195 |
| 14 | 55680496 | 55710886 - | NM_001039198 | Zfhx2         | 12541 | 55698145 | 55698345 |
| 14 | 55680496 | 55710886 - | NM_001039198 | Zfhx2         | -3776 | 55714662 | 55714862 |
| 14 | 55680496 | 55710886 - | NM_001039198 | Zfhx2         | -3111 | 55713997 | 55714197 |
| 14 | 55713621 | 55717833 + | NM_153083    | Thtpa         | 1041  | 55714662 | 55714862 |
| 14 | 55713621 | 55717833 + | NM_153083    | Thtpa         | 376   | 55713997 | 55714197 |
| 14 | 56197331 | 56200365 + | NM_011189    | Psme1         | 519   | 56197850 | 56198050 |
| 14 | 56200361 | 56204092 - | NM_033146    | Emc9          | -474  | 56204566 | 56204766 |
| 14 | 56210627 | 56222509 + | NM_194346    | Rnf31         | -5861 | 56204566 | 56204766 |
| 14 | 56222822 | 56228868 + | NM_001159417 | Irf9          | 0     | 56222680 | 56222880 |
| 14 | 56222822 | 56228868 + | NM_008394    | Irf9          | 0     | 56222680 | 56222880 |
| 14 | 56223416 | 56228868 + | NM_001159418 | Irf9          | -536  | 56222680 | 56222880 |
| 14 | 56237003 | 56244233 + | NM_020002    | Rec8          | 786   | 56237789 | 56237989 |
| 14 | 56244466 | 56254516 - | NM_024267    | Ipo4          | 407   | 56253909 | 56254109 |
| 14 | 56357857 | 56364522 - | NM_026819    | Dhrs1         | 98    | 56364224 | 56364424 |
| 14 | 56364530 | 56374472 + | NM_026403    | Nop9          | -106  | 56364224 | 56364424 |
| 14 | 56372892 | 56377262 - | NM_009894    | Cideb         | 501   | 56376561 | 56376761 |
| 14 | 56380265 | 56382067 + | NM_020490    | Ltb4r2        | -3504 | 56376561 | 56376761 |

|    |          |            |              |        |       |          |          |
|----|----------|------------|--------------|--------|-------|----------|----------|
| 14 | 56384799 | 56387330 + | NM_008519    | Ltb4r1 | -8038 | 56376561 | 56376761 |
| 14 | 56387929 | 56402857 - | NM_080435    | Adcy4  | 2440  | 56400217 | 56400417 |
| 14 | 56403832 | 56407695 - | NM_001164107 | Ripk3  | -7078 | 56414773 | 56414973 |
| 14 | 56403832 | 56407695 - | NM_001164108 | Ripk3  | -7078 | 56414773 | 56414973 |
| 14 | 56403832 | 56407695 - | NM_019955    | Ripk3  | -7078 | 56414773 | 56414973 |
| 14 | 56472952 | 56493574 + | NM_001040072 | Nynrin | 19896 | 56492848 | 56493048 |
| 14 | 57194456 | 57278636 + | NM_001145978 | Parp4  | 29728 | 57224184 | 57224384 |
| 14 | 57194456 | 57278636 + | NM_001145978 | Parp4  | 50721 | 57245177 | 57245377 |
| 14 | 57341286 | 57397154 - | NM_025682    | Pspc1  | 20706 | 57376248 | 57376448 |
| 14 | 57506632 | 57581417 + | NM_029498    | Zmym2  | 33772 | 57540404 | 57540604 |
| 14 | 57506632 | 57581417 + | NM_029498    | Zmym2  | 13760 | 57520392 | 57520592 |
| 14 | 57653297 | 57676561 - | NM_001271623 | Gja3   | 1133  | 57675228 | 57675428 |
| 14 | 57653297 | 57676868 - | NM_016975    | Gja3   | 1440  | 57675228 | 57675428 |
| 14 | 57893871 | 58017321 - | NM_030004    | Cryl1  | 11537 | 58005584 | 58005784 |
| 14 | 57893871 | 58017321 - | NM_030004    | Cryl1  | 1387  | 58015734 | 58015934 |
| 14 | 57893871 | 58017321 - | NM_030004    | Cryl1  | 9418  | 58007703 | 58007903 |
| 14 | 58042908 | 58136774 + | NM_009376    | Ift88  | 2491  | 58045399 | 58045599 |
| 14 | 58691523 | 58731558 + | NM_013518    | Fgf9   | 15027 | 58706550 | 58706750 |
| 14 | 59820065 | 59856103 + | NM_027764    | Rcbtb1 | 30769 | 59850834 | 59851034 |
| 14 | 59820065 | 59856103 + | NM_027764    | Rcbtb1 | -336  | 59819529 | 59819729 |
| 14 | 60020848 | 60059715 - | NM_001081024 | Setdb2 | 240   | 60059275 | 60059475 |
| 14 | 60059818 | 60167741 + | NM_026908    | Cab39l | 91214 | 60151032 | 60151232 |
| 14 | 60059818 | 60167741 + | NM_026908    | Cab39l | -343  | 60059275 | 60059475 |
| 14 | 60178225 | 60216797 - | NM_001168535 | Cdadcl | -1668 | 60218465 | 60218665 |
| 14 | 60178225 | 60216797 - | NM_001168535 | Cdadcl | -61   | 60216858 | 60217058 |
| 14 | 60178225 | 60216797 - | NM_001168538 | Cdadcl | -1668 | 60218465 | 60218665 |
| 14 | 60178225 | 60216797 - | NM_001168538 | Cdadcl | -61   | 60216858 | 60217058 |
| 14 | 60179135 | 60216797 - | NM_001168537 | Cdadcl | -1668 | 60218465 | 60218665 |
| 14 | 60179135 | 60216797 - | NM_001168537 | Cdadcl | -61   | 60216858 | 60217058 |
| 14 | 60182782 | 60216797 - | NM_027986    | Cdadcl | -1668 | 60218465 | 60218665 |

|    |          |            |              |               |        |          |          |
|----|----------|------------|--------------|---------------|--------|----------|----------|
| 14 | 60182782 | 60216797 - | NM_027986    | Cdadc1        | -61    | 60216858 | 60217058 |
| 14 | 60186566 | 60216797 - | NM_001168536 | Cdadc1        | -1668  | 60218465 | 60218665 |
| 14 | 60186566 | 60216797 - | NM_001168536 | Cdadc1        | -61    | 60216858 | 60217058 |
| 14 | 60266578 | 60705672 - | NM_015803    | Atp8a2        | 107855 | 60597617 | 60597817 |
| 14 | 60266578 | 60705672 - | NM_015803    | Atp8a2        | 117803 | 60587669 | 60587869 |
| 14 | 60266578 | 60705672 - | NM_015803    | Atp8a2        | 126761 | 60578711 | 60578911 |
| 14 | 60884042 | 60921209 + | NM_144843    | Mtmr6         | 21046  | 60905088 | 60905288 |
| 14 | 60997123 | 60999841 + | NM_001164705 | Amer2         | -9724  | 60987199 | 60987399 |
| 14 | 60997123 | 60999841 + | NM_028113    | Amer2         | -9724  | 60987199 | 60987399 |
| 14 | 61253542 | 61383394 + | NM_001033272 | Spata13       | 69866  | 61323408 | 61323608 |
| 14 | 61403403 | 61522451 + | NM_027436    | Mipep         | 24987  | 61428390 | 61428590 |
| 14 | 61403403 | 61524318 + | NR_040642    | Mipep         | 24987  | 61428390 | 61428590 |
| 14 | 61582671 | 61656825 - | NM_001164155 | Tnfrsf19      | -8187  | 61665012 | 61665212 |
| 14 | 61582671 | 61665693 - | NM_013869    | Tnfrsf19      | 481    | 61665012 | 61665212 |
| 14 | 61757294 | 61859531 + | NM_172809    | Sacs          | 53544  | 61810838 | 61811038 |
| 14 | 61911820 | 61924172 - | NR_033788    | 1700109G14Rik | -9920  | 61934092 | 61934292 |
| 14 | 62111525 | 62119220 + | NR_045714    | 4930556J02Rik | 5547   | 62117072 | 62117272 |
| 14 | 62150688 | 62175724 - | NM_001310603 | Spryd7        | 1295   | 62174229 | 62174429 |
| 14 | 62150688 | 62175724 - | NM_001310603 | Spryd7        | 2591   | 62172933 | 62173133 |
| 14 | 62150688 | 62175724 - | NM_025697    | Spryd7        | 1295   | 62174229 | 62174429 |
| 14 | 62150688 | 62175724 - | NM_025697    | Spryd7        | 2591   | 62172933 | 62173133 |
| 14 | 62221673 | 62301211 - | NR_028264    | Dleu2         | 25660  | 62275351 | 62275551 |
| 14 | 63741299 | 63764761 + | NM_007798    | Ctsb          | 746    | 63742045 | 63742245 |
| 14 | 63817751 | 63864109 - | NM_001310610 | Gata4         | -873   | 63864982 | 63865182 |
| 14 | 63817751 | 63864109 - | NM_001310610 | Gata4         | 13957  | 63849952 | 63850152 |
| 14 | 63817751 | 63864109 - | NM_001310610 | Gata4         | 11414  | 63852495 | 63852695 |
| 14 | 63817751 | 63864109 - | NM_008092    | Gata4         | -873   | 63864982 | 63865182 |
| 14 | 63817751 | 63864109 - | NM_008092    | Gata4         | 13957  | 63849952 | 63850152 |
| 14 | 63817751 | 63864109 - | NM_008092    | Gata4         | 11414  | 63852495 | 63852695 |
| 14 | 63991674 | 64036025 - | NM_007549    | Blk           | 32942  | 64002883 | 64003083 |

|    |          |            |              |               |        |          |          |
|----|----------|------------|--------------|---------------|--------|----------|----------|
| 14 | 64479149 | 64538697 + | NM_028228    | Pinx1         | 24980  | 64504129 | 64504329 |
| 14 | 64589959 | 64606618 - | NM_026359    | 4930578I06Rik | 4438   | 64601980 | 64602180 |
| 14 | 64611268 | 64652344 + | NM_146246    | Rp1l1         | -9088  | 64601980 | 64602180 |
| 14 | 64741458 | 65059878 - | NM_001253712 | Msra          | 840    | 65058838 | 65059038 |
| 14 | 64741458 | 65059878 - | NM_001253712 | Msra          | -1944  | 65061822 | 65062022 |
| 14 | 64741458 | 65059878 - | NM_001253712 | Msra          | -3084  | 65062962 | 65063162 |
| 14 | 64741458 | 65059878 - | NM_001253712 | Msra          | 0      | 65059845 | 65060045 |
| 14 | 64741458 | 65059878 - | NM_001253712 | Msra          | 295798 | 64763880 | 64764080 |
| 14 | 64741458 | 65059878 - | NM_001253712 | Msra          | 4624   | 65055054 | 65055254 |
| 14 | 64741458 | 65059878 - | NM_001253712 | Msra          | 1354   | 65058324 | 65058524 |
| 14 | 64741458 | 65059878 - | NM_001253712 | Msra          | 12923  | 65046755 | 65046955 |
| 14 | 64741458 | 65059878 - | NM_001253712 | Msra          | 305023 | 64754655 | 64754855 |
| 14 | 64741458 | 65059864 - | NM_001253714 | Msra          | 826    | 65058838 | 65059038 |
| 14 | 64741458 | 65059864 - | NM_001253714 | Msra          | -1958  | 65061822 | 65062022 |
| 14 | 64741458 | 65059864 - | NM_001253714 | Msra          | -3098  | 65062962 | 65063162 |
| 14 | 64741458 | 65059864 - | NM_001253714 | Msra          | 0      | 65059845 | 65060045 |
| 14 | 64741458 | 65059864 - | NM_001253714 | Msra          | 295784 | 64763880 | 64764080 |
| 14 | 64741458 | 65059864 - | NM_001253714 | Msra          | 4610   | 65055054 | 65055254 |
| 14 | 64741458 | 65059864 - | NM_001253714 | Msra          | 1340   | 65058324 | 65058524 |
| 14 | 64741458 | 65059864 - | NM_001253714 | Msra          | 12909  | 65046755 | 65046955 |
| 14 | 64741458 | 65059864 - | NM_001253714 | Msra          | 305009 | 64754655 | 64754855 |
| 14 | 64741458 | 65059864 - | NM_001253715 | Msra          | 826    | 65058838 | 65059038 |
| 14 | 64741458 | 65059864 - | NM_001253715 | Msra          | -1958  | 65061822 | 65062022 |
| 14 | 64741458 | 65059864 - | NM_001253715 | Msra          | -3098  | 65062962 | 65063162 |
| 14 | 64741458 | 65059864 - | NM_001253715 | Msra          | 0      | 65059845 | 65060045 |
| 14 | 64741458 | 65059864 - | NM_001253715 | Msra          | 295784 | 64763880 | 64764080 |
| 14 | 64741458 | 65059864 - | NM_001253715 | Msra          | 4610   | 65055054 | 65055254 |
| 14 | 64741458 | 65059864 - | NM_001253715 | Msra          | 1340   | 65058324 | 65058524 |
| 14 | 64741458 | 65059864 - | NM_001253715 | Msra          | 12909  | 65046755 | 65046955 |
| 14 | 64741458 | 65059864 - | NM_001253715 | Msra          | 305009 | 64754655 | 64754855 |



|    |          |            |              |        |        |          |          |
|----|----------|------------|--------------|--------|--------|----------|----------|
| 14 | 64741458 | 65035794 - | NM_001253716 | Msra   | 271714 | 64763880 | 64764080 |
| 14 | 64741458 | 65035794 - | NM_001253716 | Msra   | 280939 | 64754655 | 64754855 |
| 14 | 64741458 | 65074741 - | NM_026322    | Msra   | 15703  | 65058838 | 65059038 |
| 14 | 64741458 | 65074741 - | NM_026322    | Msra   | 12719  | 65061822 | 65062022 |
| 14 | 64741458 | 65074741 - | NM_026322    | Msra   | 11579  | 65062962 | 65063162 |
| 14 | 64741458 | 65074741 - | NM_026322    | Msra   | 14696  | 65059845 | 65060045 |
| 14 | 64741458 | 65074741 - | NM_026322    | Msra   | 310661 | 64763880 | 64764080 |
| 14 | 64741458 | 65074741 - | NM_026322    | Msra   | 19487  | 65055054 | 65055254 |
| 14 | 64741458 | 65074741 - | NM_026322    | Msra   | 16217  | 65058324 | 65058524 |
| 14 | 64741458 | 65074741 - | NM_026322    | Msra   | 27786  | 65046755 | 65046955 |
| 14 | 64741458 | 65074741 - | NM_026322    | Msra   | 319886 | 64754655 | 64754855 |
| 14 | 65441055 | 65568685 - | NM_177338    | Hmbox1 | 49676  | 65518809 | 65519009 |
| 14 | 65441055 | 65568685 - | NM_177338    | Hmbox1 | 7270   | 65561215 | 65561415 |
| 14 | 65441055 | 65568685 - | NM_177338    | Hmbox1 | -200   | 65568885 | 65569085 |
| 14 | 65441055 | 65568685 - | NM_177338    | Hmbox1 | 629    | 65567856 | 65568056 |
| 14 | 65441055 | 65568685 - | NM_177338    | Hmbox1 | 34288  | 65534197 | 65534397 |
| 14 | 65441055 | 65568685 - | NM_177338    | Hmbox1 | 13522  | 65554963 | 65555163 |
| 14 | 65441055 | 65568685 - | NM_177338    | Hmbox1 | 35314  | 65533171 | 65533371 |
| 14 | 65441055 | 65568685 - | NM_177338    | Hmbox1 | 40760  | 65527725 | 65527925 |
| 14 | 65441055 | 65568685 - | NM_177338    | Hmbox1 | 77185  | 65491300 | 65491500 |
| 14 | 65568882 | 65658673 + | NM_001253731 | Ints9  | -7467  | 65561215 | 65561415 |
| 14 | 65568882 | 65658673 + | NM_001253731 | Ints9  | 3      | 65568885 | 65569085 |
| 14 | 65568882 | 65658673 + | NM_001253731 | Ints9  | -826   | 65567856 | 65568056 |
| 14 | 65568882 | 65658673 + | NM_153414    | Ints9  | -7467  | 65561215 | 65561415 |
| 14 | 65568882 | 65658673 + | NM_153414    | Ints9  | 3      | 65568885 | 65569085 |
| 14 | 65568882 | 65658673 + | NM_153414    | Ints9  | -826   | 65567856 | 65568056 |
| 14 | 65670896 | 65716944 - | NM_018788    | Extl3  | 6091   | 65710653 | 65710853 |
| 14 | 65670896 | 65716944 - | NM_018788    | Extl3  | 6612   | 65710132 | 65710332 |
| 14 | 65977513 | 66017768 + | NM_199029    | Zfp395 | 18534  | 65996047 | 65996247 |
| 14 | 65977513 | 66017768 + | NM_199029    | Zfp395 | 18008  | 65995521 | 65995721 |

|    |          |            |              |         |       |          |          |
|----|----------|------------|--------------|---------|-------|----------|----------|
| 14 | 66149283 | 66211950 - | NM_001253812 | Elp3    | 56393 | 66155357 | 66155557 |
| 14 | 66149283 | 66211950 - | NM_028811    | Elp3    | 56393 | 66155357 | 66155557 |
| 14 | 66149283 | 66211950 - | NR_045599    | Elp3    | 56393 | 66155357 | 66155557 |
| 14 | 66437864 | 66452807 - | NM_028039    | Esco2   | -7939 | 66460746 | 66460946 |
| 14 | 66456139 | 66485442 + | NM_145944    | Ccdc25  | 4607  | 66460746 | 66460946 |
| 14 | 66456139 | 66485442 + | NM_145944    | Ccdc25  | 18014 | 66474153 | 66474353 |
| 14 | 66538232 | 66572582 - | NM_172604    | Scara3  | 27873 | 66544509 | 66544709 |
| 14 | 66703209 | 66743360 - | NM_001271402 | Ephx2   | 5761  | 66737399 | 66737599 |
| 14 | 66703209 | 66743360 - | NM_001271402 | Ephx2   | 35042 | 66708118 | 66708318 |
| 14 | 66703209 | 66731224 - | NM_001271403 | Ephx2   | -6175 | 66737399 | 66737599 |
| 14 | 66703209 | 66731224 - | NM_001271403 | Ephx2   | 22906 | 66708118 | 66708318 |
| 14 | 66703209 | 66729498 - | NM_001271421 | Ephx2   | -7901 | 66737399 | 66737599 |
| 14 | 66703209 | 66729498 - | NM_001271421 | Ephx2   | 21180 | 66708118 | 66708318 |
| 14 | 66703209 | 66743360 - | NM_007940    | Ephx2   | 5761  | 66737399 | 66737599 |
| 14 | 66703209 | 66743360 - | NM_007940    | Ephx2   | 35042 | 66708118 | 66708318 |
| 14 | 66759797 | 66771786 + | NM_144803    | Chrna2  | 0     | 66759632 | 66759832 |
| 14 | 66772094 | 66899890 - | NM_001162365 | Ptk2b   | 8793  | 66890897 | 66891097 |
| 14 | 66772094 | 66899890 - | NM_172498    | Ptk2b   | 8793  | 66890897 | 66891097 |
| 14 | 67632893 | 67691309 - | NM_001205188 | Ppp2r2a | 19863 | 67671246 | 67671446 |
| 14 | 67632893 | 67691309 - | NM_028032    | Ppp2r2a | 19863 | 67671246 | 67671446 |
| 14 | 68294411 | 68333668 - | NM_001110162 | Cdca2   | -884  | 68334552 | 68334752 |
| 14 | 68294411 | 68333899 - | NM_175384    | Cdca2   | -653  | 68334552 | 68334752 |
| 14 | 68334155 | 68360368 + | NM_001111028 | Kctd9   | 397   | 68334552 | 68334752 |
| 14 | 68334155 | 68360368 + | NM_001111028 | Kctd9   | 20749 | 68354904 | 68355104 |
| 14 | 68334155 | 68360368 + | NM_001285933 | Kctd9   | 397   | 68334552 | 68334752 |
| 14 | 68334155 | 68360368 + | NM_001285933 | Kctd9   | 20749 | 68354904 | 68355104 |
| 14 | 68334155 | 68360368 + | NM_134073    | Kctd9   | 397   | 68334552 | 68334752 |
| 14 | 68334155 | 68360368 + | NM_134073    | Kctd9   | 20749 | 68354904 | 68355104 |
| 14 | 68363286 | 68367494 + | NM_008145    | Gnrh1   | -8182 | 68354904 | 68355104 |
| 14 | 68369985 | 68551630 - | NM_177780    | Dock5   | 80437 | 68470993 | 68471193 |

|    |          |            |              |          |       |          |          |
|----|----------|------------|--------------|----------|-------|----------|----------|
| 14 | 68369985 | 68551630 - | NM_177780    | Dock5    | 16135 | 68535295 | 68535495 |
| 14 | 69859908 | 69903161 - | NM_026331    | Slc25a37 | 8572  | 69894389 | 69894589 |
| 14 | 69859908 | 69903161 - | NM_026331    | Slc25a37 | -5475 | 69908636 | 69908836 |
| 14 | 69859908 | 69903161 - | NM_026331    | Slc25a37 | 22145 | 69880816 | 69881016 |
| 14 | 69908455 | 69912357 - | NM_173420    | Synb     | -6502 | 69918859 | 69919059 |
| 14 | 69908455 | 69912357 - | NM_173420    | Synb     | -8338 | 69920695 | 69920895 |
| 14 | 69908455 | 69912357 - | NM_173420    | Synb     | 3521  | 69908636 | 69908836 |
| 14 | 70240214 | 70459726 + | NM_028560    | Pebp4    | 58340 | 70298554 | 70298754 |
| 14 | 70499952 | 70538014 + | NM_021328    | Bin3     | -8946 | 70490806 | 70491006 |
| 14 | 70564025 | 70576623 - | NM_001253736 | Pdlim2   | -2592 | 70579215 | 70579415 |
| 14 | 70564025 | 70577480 - | NM_145978    | Pdlim2   | -1735 | 70579215 | 70579415 |
| 14 | 70580275 | 70605830 - | NM_001271407 | Sorbs3   | 3703  | 70601927 | 70602127 |
| 14 | 70580275 | 70604431 - | NM_001271408 | Sorbs3   | 2304  | 70601927 | 70602127 |
| 14 | 70580275 | 70592054 - | NM_001271409 | Sorbs3   | -9873 | 70601927 | 70602127 |
| 14 | 70580275 | 70607479 - | NM_011366    | Sorbs3   | 5352  | 70601927 | 70602127 |
| 14 | 70703274 | 70751232 - | NM_001135151 | Slc39a14 | 11658 | 70739374 | 70739574 |
| 14 | 70703274 | 70751232 - | NM_001135151 | Slc39a14 | 2812  | 70748220 | 70748420 |
| 14 | 70703274 | 70751232 - | NM_001135151 | Slc39a14 | -1671 | 70752903 | 70753103 |
| 14 | 70703274 | 70751232 - | NM_001135151 | Slc39a14 | 11051 | 70739981 | 70740181 |
| 14 | 70703274 | 70748241 - | NM_001135152 | Slc39a14 | 8667  | 70739374 | 70739574 |
| 14 | 70703274 | 70748241 - | NM_001135152 | Slc39a14 | 0     | 70748220 | 70748420 |
| 14 | 70703274 | 70748241 - | NM_001135152 | Slc39a14 | -4662 | 70752903 | 70753103 |
| 14 | 70703274 | 70748241 - | NM_001135152 | Slc39a14 | 8060  | 70739981 | 70740181 |
| 14 | 70703274 | 70751232 - | NM_144808    | Slc39a14 | 11658 | 70739374 | 70739574 |
| 14 | 70703274 | 70751232 - | NM_144808    | Slc39a14 | 2812  | 70748220 | 70748420 |
| 14 | 70703274 | 70751232 - | NM_144808    | Slc39a14 | -1671 | 70752903 | 70753103 |
| 14 | 70703274 | 70751232 - | NM_144808    | Slc39a14 | 11051 | 70739981 | 70740181 |
| 14 | 70772287 | 70828902 - | NM_021308    | Piwil2   | 41160 | 70787542 | 70787742 |
| 14 | 70772287 | 70828902 - | NM_021308    | Piwil2   | 38635 | 70790067 | 70790267 |
| 14 | 70977654 | 70982379 + | NM_153136    | Nudt18   | -71   | 70977383 | 70977583 |

|    |          |            |              |         |        |          |          |
|----|----------|------------|--------------|---------|--------|----------|----------|
| 14 | 71036012 | 71042076 - | NM_008004    | Fgf17   | -4623  | 71046699 | 71046899 |
| 14 | 71047109 | 71052892 - | NM_181345    | Npm2    | -6437  | 71059329 | 71059529 |
| 14 | 71054053 | 71166436 - | NM_023045    | Xpo7    | 106907 | 71059329 | 71059529 |
| 14 | 71054053 | 71166436 - | NM_023045    | Xpo7    | 4513   | 71161723 | 71161923 |
| 14 | 71054053 | 71166436 - | NM_023045    | Xpo7    | 84621  | 71081615 | 71081815 |
| 14 | 72937760 | 73109811 - | NM_207636    | Fndc3a  | 4934   | 73104677 | 73104877 |
| 14 | 73595309 | 73725599 - | NM_009029    | Rb1     | 31877  | 73693522 | 73693722 |
| 14 | 73595309 | 73725599 - | NM_009029    | Rb1     | 41012  | 73684387 | 73684587 |
| 14 | 73762039 | 73785079 - | NM_008410    | Itm2b   | -438   | 73785517 | 73785717 |
| 14 | 73762039 | 73785079 - | NM_008410    | Itm2b   | 16661  | 73768218 | 73768418 |
| 14 | 73952593 | 73995950 + | NM_011506    | Sucla2  | 18441  | 73971034 | 73971234 |
| 14 | 75154480 | 75347685 - | NM_001033439 | Lrch1   | 105947 | 75241538 | 75241738 |
| 14 | 75154480 | 75347685 - | NM_001033439 | Lrch1   | 37217  | 75310268 | 75310468 |
| 14 | 75154480 | 75347685 - | NM_001033439 | Lrch1   | 57163  | 75290322 | 75290522 |
| 14 | 75154480 | 75347685 - | NM_001033439 | Lrch1   | 63510  | 75283975 | 75284175 |
| 14 | 75154480 | 75347685 - | NM_001252132 | Lrch1   | 105947 | 75241538 | 75241738 |
| 14 | 75154480 | 75347685 - | NM_001252132 | Lrch1   | 37217  | 75310268 | 75310468 |
| 14 | 75154480 | 75347685 - | NM_001252132 | Lrch1   | 57163  | 75290322 | 75290522 |
| 14 | 75154480 | 75347685 - | NM_001252132 | Lrch1   | 63510  | 75283975 | 75284175 |
| 14 | 75530930 | 75630650 + | NM_001247984 | Lcp1    | 88661  | 75619591 | 75619791 |
| 14 | 75530930 | 75630650 + | NM_001247984 | Lcp1    | 66632  | 75597562 | 75597762 |
| 14 | 75536232 | 75630650 + | NM_008879    | Lcp1    | 83359  | 75619591 | 75619791 |
| 14 | 75536232 | 75630650 + | NM_008879    | Lcp1    | 61330  | 75597562 | 75597762 |
| 14 | 76245063 | 76248111 + | NM_009429    | Tpt1    | -7378  | 76237485 | 76237685 |
| 14 | 76486039 | 76510623 - | NM_026177    | Gpalpp1 | -8186  | 76518809 | 76519009 |
| 14 | 76510698 | 76537187 + | NM_013745    | Nufip1  | 8111   | 76518809 | 76519009 |
| 14 | 76814768 | 76907573 + | NM_001310646 | Tsc22d1 | 72740  | 76887508 | 76887708 |
| 14 | 76814768 | 76907573 + | NM_001310646 | Tsc22d1 | 65066  | 76879834 | 76880034 |
| 14 | 76815628 | 76907573 + | NM_207652    | Tsc22d1 | 71880  | 76887508 | 76887708 |
| 14 | 76815628 | 76907573 + | NM_207652    | Tsc22d1 | 64206  | 76879834 | 76880034 |

|    |          |            |              |               |        |          |          |
|----|----------|------------|--------------|---------------|--------|----------|----------|
| 14 | 76888243 | 76907573 + | NM_001177751 | Tsc22d1       | -535   | 76887508 | 76887708 |
| 14 | 76888243 | 76907573 + | NM_001177751 | Tsc22d1       | -8209  | 76879834 | 76880034 |
| 14 | 76914365 | 76920663 - | NR_045660    | 4930444M15Rik | 0      | 76920471 | 76920671 |
| 14 | 76914365 | 76920663 - | NR_045660    | 4930444M15Rik | 4520   | 76915943 | 76916143 |
| 14 | 76932619 | 76956495 - | NM_001160326 | Serp2         | 17410  | 76938885 | 76939085 |
| 14 | 76932619 | 76956697 - | NR_027699    | Serp2         | 17612  | 76938885 | 76939085 |
| 14 | 77556570 | 78121571 + | NM_001253759 | Enox1         | 215301 | 77771871 | 77772071 |
| 14 | 77556570 | 78121571 + | NM_001253759 | Enox1         | 105506 | 77662076 | 77662276 |
| 14 | 77556570 | 78121571 + | NM_172813    | Enox1         | 215301 | 77771871 | 77772071 |
| 14 | 77556570 | 78121571 + | NM_172813    | Enox1         | 105506 | 77662076 | 77662276 |
| 14 | 78193752 | 78198776 - | NM_001033440 | Gm1587        | -4748  | 78203524 | 78203724 |
| 14 | 78226024 | 78274725 - | NM_025384    | Dnajc15       | 14354  | 78260171 | 78260371 |
| 14 | 78969416 | 79124897 - | NM_001081336 | Dgkh          | 40629  | 79084068 | 79084268 |
| 14 | 79734314 | 79790476 - | NM_025832    | Naa16         | 32303  | 79757973 | 79758173 |
| 14 | 79881001 | 79982299 + | NM_007920    | Elf1          | 63091  | 79944092 | 79944292 |
| 14 | 79915481 | 79982299 + | NM_001286411 | Elf1          | 28611  | 79944092 | 79944292 |
| 14 | 79915481 | 79982299 + | NM_001286412 | Elf1          | 28611  | 79944092 | 79944292 |
| 14 | 79987498 | 80029563 + | NM_026474    | Sugt1         | 32532  | 80020030 | 80020230 |
| 14 | 80400109 | 80421738 + | NM_001030294 | Olfm4         | 10172  | 80410281 | 80410481 |
| 14 | 87056130 | 87540922 - | NM_019670    | Diap3         | 271308 | 87269414 | 87269614 |
| 14 | 87816390 | 87915000 + | NM_001253755 | Tdrd3         | 56425  | 87872815 | 87873015 |
| 14 | 87816390 | 87945316 + | NM_172605    | Tdrd3         | 56425  | 87872815 | 87873015 |
| 14 | 99433763 | 99445356 - | NM_175245    | Mzt1          | -737   | 99446093 | 99446293 |
| 14 | 99445596 | 99473327 + | NM_175265    | Bora          | 12568  | 99458164 | 99458364 |
| 14 | 99445596 | 99473327 + | NM_175265    | Bora          | 497    | 99446093 | 99446293 |
| 14 | 99498643 | 99653714 + | NM_029320    | Pibf1         | 18460  | 99517103 | 99517303 |
| 14 | 99697910 | 99712629 + | NM_009769    | Klf5          | 8589   | 99706499 | 99706699 |
| 14 | 99697910 | 99712629 + | NM_009769    | Klf5          | 5728   | 99703638 | 99703838 |
| 14 | 99697910 | 99712629 + | NM_009769    | Klf5          | 7871   | 99705781 | 99705981 |
| 14 | 99697910 | 99712629 + | NM_009769    | Klf5          | 1853   | 99699763 | 99699963 |

|    |           |             |              |        |        |           |           |
|----|-----------|-------------|--------------|--------|--------|-----------|-----------|
| 14 | 100269862 | 100549016 - | NM_010636    | Klf12  | 215894 | 100332922 | 100333122 |
| 14 | 102129145 | 102333911 + | NM_201529    | Lmo7   | 110613 | 102239758 | 102239958 |
| 14 | 102129145 | 102333911 + | NM_201529    | Lmo7   | 162122 | 102291267 | 102291467 |
| 14 | 102129145 | 102333911 + | NM_201529    | Lmo7   | 117664 | 102246809 | 102247009 |
| 14 | 102129145 | 102333911 + | NM_201529    | Lmo7   | 139624 | 102268769 | 102268969 |
| 14 | 102129145 | 102333911 + | NM_201529    | Lmo7   | 116630 | 102245775 | 102245975 |
| 14 | 102129145 | 102333911 + | NM_201529    | Lmo7   | 68042  | 102197187 | 102197387 |
| 14 | 102129145 | 102333911 + | NM_201529    | Lmo7   | 108801 | 102237946 | 102238146 |
| 14 | 102129145 | 102333911 + | NM_201529    | Lmo7   | 109247 | 102238392 | 102238592 |
| 14 | 102129145 | 102333911 + | NM_201529    | Lmo7   | 106267 | 102235412 | 102235612 |
| 14 | 102129145 | 102333911 + | NM_201529    | Lmo7   | 22275  | 102151420 | 102151620 |
| 14 | 103479456 | 103498727 - | NM_015822    | Fbxl3  | 5547   | 103492980 | 103493180 |
| 14 | 103512628 | 103746018 - | NM_207215    | Mycbp2 | 152141 | 103593677 | 103593877 |
| 14 | 104213832 | 104243694 - | NM_001136061 | Ednrb  | 6356   | 104237138 | 104237338 |
| 14 | 104213832 | 104242919 - | NM_001276296 | Ednrb  | 5581   | 104237138 | 104237338 |
| 14 | 104213832 | 104242919 - | NM_007904    | Ednrb  | 5581   | 104237138 | 104237338 |
| 14 | 104876751 | 104921884 - | NM_026047    | Rnf219 | 958    | 104920726 | 104920926 |
| 14 | 105657890 | 105708516 + | NM_001190989 | Ndfip2 | 8804   | 105666694 | 105666894 |
| 14 | 105657890 | 105708516 + | NM_029561    | Ndfip2 | 8804   | 105666694 | 105666894 |
| 14 | 106291164 | 106296037 - | NM_011897    | Spry2  | -4025  | 106300062 | 106300262 |
| 14 | 118881914 | 119105442 - | NM_001033336 | Abcc4  | 70175  | 119035067 | 119035267 |
| 14 | 118881914 | 119076154 - | NM_001163675 | Abcc4  | 40887  | 119035067 | 119035267 |
| 14 | 118881914 | 119105442 - | NM_001163676 | Abcc4  | 70175  | 119035067 | 119035267 |
| 14 | 120674891 | 120830921 + | NM_175341    | Mbnl2  | -4332  | 120670359 | 120670559 |
| 14 | 120674891 | 120830921 + | NM_175341    | Mbnl2  | 131023 | 120805914 | 120806114 |
| 14 | 120674891 | 120830921 + | NM_175341    | Mbnl2  | 68005  | 120742896 | 120743096 |
| 14 | 120674891 | 120830921 + | NM_175341    | Mbnl2  | 37628  | 120712519 | 120712719 |
| 14 | 120674891 | 120830921 + | NM_207515    | Mbnl2  | -4332  | 120670359 | 120670559 |
| 14 | 120674891 | 120830921 + | NM_207515    | Mbnl2  | 131023 | 120805914 | 120806114 |
| 14 | 120674891 | 120830921 + | NM_207515    | Mbnl2  | 68005  | 120742896 | 120743096 |

|    |           |             |              |               |        |           |           |
|----|-----------|-------------|--------------|---------------|--------|-----------|-----------|
| 14 | 120674891 | 120830921 + | NM_207515    | Mbnl2         | 37628  | 120712519 | 120712719 |
| 14 | 121434796 | 121682949 + | NM_134082    | Farp1         | 53072  | 121487868 | 121488068 |
| 14 | 121434796 | 121682949 + | NM_134082    | Farp1         | 85471  | 121520267 | 121520467 |
| 14 | 121685563 | 121778453 - | NM_145465    | Stk24         | 37290  | 121740963 | 121741163 |
| 14 | 121858843 | 121904477 - | NM_053079    | Slc15a1       | -204   | 121904681 | 121904881 |
| 14 | 121858843 | 121904477 - | NM_053079    | Slc15a1       | -3756  | 121908233 | 121908433 |
| 14 | 121858843 | 121904477 - | NM_053079    | Slc15a1       | 33688  | 121870589 | 121870789 |
| 14 | 121858843 | 121904477 - | NM_053079    | Slc15a1       | 11271  | 121893006 | 121893206 |
| 14 | 121858843 | 121904477 - | NM_053079    | Slc15a1       | 10533  | 121893744 | 121893944 |
| 14 | 121858843 | 121904477 - | NM_053079    | Slc15a1       | 20966  | 121883311 | 121883511 |
| 14 | 121858843 | 121904477 - | NM_053079    | Slc15a1       | 40573  | 121863704 | 121863904 |
| 14 | 121858843 | 121904477 - | NM_053079    | Slc15a1       | 34677  | 121869600 | 121869800 |
| 14 | 121941261 | 122097640 - | NM_001081039 | Dock9         | 144266 | 121953174 | 121953374 |
| 14 | 121941261 | 122138152 - | NM_001128307 | Dock9         | 184778 | 121953174 | 121953374 |
| 14 | 121941261 | 122138152 - | NM_001128308 | Dock9         | 184778 | 121953174 | 121953374 |
| 14 | 121941261 | 122196957 - | NM_134074    | Dock9         | 5452   | 122191305 | 122191505 |
| 14 | 121941261 | 122196957 - | NM_134074    | Dock9         | 243583 | 121953174 | 121953374 |
| 14 | 122276081 | 122278631 - | NR_130999    | 1810041H14Rik | -3935  | 122282566 | 122282766 |
| 14 | 122276081 | 122277493 - | NR_131002    | 1810041H14Rik | -5073  | 122282566 | 122282766 |
| 14 | 122277828 | 122420258 + | NM_026861    | Ubac2         | 4738   | 122282566 | 122282766 |
| 14 | 122277828 | 122420258 + | NM_026861    | Ubac2         | 111402 | 122389230 | 122389430 |
| 14 | 122506304 | 122558826 + | NM_080556    | Tm9sf2        | 30287  | 122536591 | 122536791 |
| 14 | 122933550 | 123289167 + | NM_144844    | Pcca          | 331273 | 123264823 | 123265023 |
| 14 | 123290082 | 123312388 - | NM_145466    | Ggact         | 3233   | 123308955 | 123309155 |
| 14 | 123675863 | 124026367 - | NM_177393    | Nalcn         | 22216  | 124003951 | 124004151 |
| 14 | 123675863 | 124026367 - | NM_177393    | Nalcn         | 8424   | 124017743 | 124017943 |
| 15 | 3220767   | 3230509 +   | NM_001042613 | Sepp1         | 4715   | 3225482   | 3225682   |
| 15 | 3220811   | 3230509 +   | NM_001042614 | Sepp1         | 4671   | 3225482   | 3225682   |
| 15 | 3220977   | 3230509 +   | NM_009155    | Sepp1         | 4505   | 3225482   | 3225682   |
| 15 | 3913564   | 3929574 -   | NM_134099    | Fbxo4         | 9664   | 3919710   | 3919910   |

|    |         |           |              |               |        |         |         |
|----|---------|-----------|--------------|---------------|--------|---------|---------|
| 15 | 3932035 | 3945753 - | NM_145930    | AW549877      | 1098   | 3944455 | 3944655 |
| 15 | 3946039 | 3965859 + | NR_045740    | A630020A06    | -1384  | 3944455 | 3944655 |
| 15 | 3970111 | 3977407 - | NR_028266    | BC037032      | 1040   | 3976167 | 3976367 |
| 15 | 3970111 | 3977407 - | NR_028266    | BC037032      | -6925  | 3984332 | 3984532 |
| 15 | 3976428 | 4105345 + | NM_024188    | Oxct1         | -61    | 3976167 | 3976367 |
| 15 | 3976428 | 4105345 + | NM_024188    | Oxct1         | 53419  | 4029847 | 4030047 |
| 15 | 3976428 | 4105345 + | NM_024188    | Oxct1         | 7904   | 3984332 | 3984532 |
| 15 | 5135560 | 5168333 + | NM_026213    | Ttc33         | 10431  | 5145991 | 5146191 |
| 15 | 5183399 | 5194188 - | NM_001136079 | Ptger4        | 3022   | 5190966 | 5191166 |
| 15 | 5183399 | 5194188 - | NM_001136079 | Ptger4        | 846    | 5193142 | 5193342 |
| 15 | 5183399 | 5194188 - | NM_008965    | Ptger4        | 3022   | 5190966 | 5191166 |
| 15 | 5183399 | 5194188 - | NM_008965    | Ptger4        | 846    | 5193142 | 5193342 |
| 15 | 5446318 | 5544984 + | NR_045274    | 5430437J10Rik | 9961   | 5456279 | 5456479 |
| 15 | 5446318 | 5544984 + | NR_045274    | 5430437J10Rik | 79816  | 5526134 | 5526334 |
| 15 | 5446318 | 5544984 + | NR_045274    | 5430437J10Rik | 89368  | 5535686 | 5535886 |
| 15 | 5446318 | 5544984 + | NR_045274    | 5430437J10Rik | 21430  | 5467748 | 5467948 |
| 15 | 5446318 | 5544984 + | NR_045274    | 5430437J10Rik | 10760  | 5457078 | 5457278 |
| 15 | 6249789 | 6390710 + | NM_001008702 | Dab2          | 86901  | 6336690 | 6336890 |
| 15 | 6336748 | 6390710 + | NM_001037905 | Dab2          | 0      | 6336690 | 6336890 |
| 15 | 6336748 | 6390710 + | NM_001102400 | Dab2          | 0      | 6336690 | 6336890 |
| 15 | 6336748 | 6390710 + | NM_001310446 | Dab2          | 0      | 6336690 | 6336890 |
| 15 | 6336748 | 6390710 + | NM_023118    | Dab2          | 0      | 6336690 | 6336890 |
| 15 | 7156120 | 7348391 - | NM_001289496 | Egflam        | 145706 | 7202485 | 7202685 |
| 15 | 7156120 | 7348396 - | NM_001289498 | Egflam        | 145711 | 7202485 | 7202685 |
| 15 | 7156120 | 7348391 - | NM_178748    | Egflam        | 145706 | 7202485 | 7202685 |
| 15 | 8239824 | 8394464 - | NM_027707    | Nipbl         | -1841  | 8396305 | 8396505 |
| 15 | 8239824 | 8394464 - | NM_027707    | Nipbl         | 84370  | 8309894 | 8310094 |
| 15 | 8239824 | 8394464 - | NM_201232    | Nipbl         | -1841  | 8396305 | 8396505 |
| 15 | 8239824 | 8394464 - | NM_201232    | Nipbl         | 84370  | 8309894 | 8310094 |
| 15 | 9001009 | 9040254 + | NM_001040395 | Nadk2         | -434   | 9000375 | 9000575 |



|    |          |            |              |         |        |          |          |
|----|----------|------------|--------------|---------|--------|----------|----------|
| 15 | 9001009  | 9040254 +  | NM_001040395 | Nadk2   | -715   | 9000094  | 9000294  |
| 15 | 9001009  | 9040254 +  | NM_001085410 | Nadk2   | -434   | 9000375  | 9000575  |
| 15 | 9001009  | 9040254 +  | NM_001085410 | Nadk2   | -715   | 9000094  | 9000294  |
| 15 | 9001009  | 9036936 +  | NM_001286253 | Nadk2   | -434   | 9000375  | 9000575  |
| 15 | 9001009  | 9036936 +  | NM_001286253 | Nadk2   | -715   | 9000094  | 9000294  |
| 15 | 9001009  | 9040254 +  | NM_001286255 | Nadk2   | -434   | 9000375  | 9000575  |
| 15 | 9001009  | 9040254 +  | NM_001286255 | Nadk2   | -715   | 9000094  | 9000294  |
| 15 | 10106993 | 10266776 + | NM_011169    | Prlr    | 56439  | 10163432 | 10163632 |
| 15 | 10106993 | 10266776 + | NM_011169    | Prlr    | 38550  | 10145543 | 10145743 |
| 15 | 10106993 | 10266776 + | NM_011169    | Prlr    | 12099  | 10119092 | 10119292 |
| 15 | 10153661 | 10278936 + | NM_001253781 | Prlr    | 9771   | 10163432 | 10163632 |
| 15 | 10153661 | 10278936 + | NM_001253781 | Prlr    | -7918  | 10145543 | 10145743 |
| 15 | 10288288 | 10339909 + | NM_001310735 | Agxt2   | 30098  | 10318386 | 10318586 |
| 15 | 10288288 | 10339909 + | NM_001310736 | Agxt2   | 30098  | 10318386 | 10318586 |
| 15 | 10288334 | 10339494 + | NM_001031851 | Agxt2   | 30052  | 10318386 | 10318586 |
| 15 | 10498733 | 10644387 - | NM_001166408 | Rai14   | 56843  | 10587344 | 10587544 |
| 15 | 10498733 | 10644387 - | NM_001166408 | Rai14   | 24234  | 10619953 | 10620153 |
| 15 | 10498733 | 10644387 - | NM_001166408 | Rai14   | 23132  | 10621055 | 10621255 |
| 15 | 10498733 | 10644387 - | NM_001166408 | Rai14   | 25141  | 10619046 | 10619246 |
| 15 | 10498733 | 10643296 - | NM_030690    | Rai14   | 55752  | 10587344 | 10587544 |
| 15 | 10498733 | 10643296 - | NM_030690    | Rai14   | 23143  | 10619953 | 10620153 |
| 15 | 10498733 | 10643296 - | NM_030690    | Rai14   | 22041  | 10621055 | 10621255 |
| 15 | 10498733 | 10643296 - | NM_030690    | Rai14   | 24050  | 10619046 | 10619246 |
| 15 | 10758806 | 10762469 + | NR_040357    | Gm19276 | -16    | 10758590 | 10758790 |
| 15 | 11313418 | 11329414 - | NM_033074    | Tars    | -216   | 11329630 | 11329830 |
| 15 | 12134849 | 12201996 + | NM_172958    | Mtmr12  | 13681  | 12148530 | 12148730 |
| 15 | 12286809 | 12522312 - | NM_001081064 | Pdzd2   | 224704 | 12297408 | 12297608 |
| 15 | 12286809 | 12522312 - | NM_001081064 | Pdzd2   | 226539 | 12295573 | 12295773 |
| 15 | 21041207 | 21519289 + | NM_001008420 | Cdh12   | 3432   | 21044639 | 21044839 |
| 15 | 25552305 | 25743427 + | NM_019472    | Myo10   | 37087  | 25589392 | 25589592 |

|    |          |            |              |         |        |          |          |
|----|----------|------------|--------------|---------|--------|----------|----------|
| 15 | 25552305 | 25743427 + | NM_019472    | Myo10   | 27938  | 25580243 | 25580443 |
| 15 | 25773053 | 25903452 + | NM_001034851 | Fam134b | 99017  | 25872070 | 25872270 |
| 15 | 25773053 | 25903452 + | NM_001034851 | Fam134b | 122998 | 25896051 | 25896251 |
| 15 | 25773053 | 25903452 + | NM_001034851 | Fam134b | 89217  | 25862270 | 25862470 |
| 15 | 25773053 | 25903452 + | NM_001034851 | Fam134b | 80731  | 25853784 | 25853984 |
| 15 | 25863307 | 25903452 + | NM_001277318 | Fam134b | 8763   | 25872070 | 25872270 |
| 15 | 25863307 | 25903452 + | NM_001277318 | Fam134b | 32744  | 25896051 | 25896251 |
| 15 | 25863307 | 25903452 + | NM_001277318 | Fam134b | -837   | 25862270 | 25862470 |
| 15 | 25863307 | 25903452 + | NM_001277318 | Fam134b | -9323  | 25853784 | 25853984 |
| 15 | 25870457 | 25903452 + | NM_001277315 | Fam134b | 1613   | 25872070 | 25872270 |
| 15 | 25870457 | 25903452 + | NM_001277315 | Fam134b | 25594  | 25896051 | 25896251 |
| 15 | 25870457 | 25903452 + | NM_001277315 | Fam134b | -7987  | 25862270 | 25862470 |
| 15 | 25870581 | 25903452 + | NM_001277316 | Fam134b | 1489   | 25872070 | 25872270 |
| 15 | 25870581 | 25903452 + | NM_001277316 | Fam134b | 25470  | 25896051 | 25896251 |
| 15 | 25870581 | 25903452 + | NM_001277316 | Fam134b | -8111  | 25862270 | 25862470 |
| 15 | 25870581 | 25903452 + | NM_025459    | Fam134b | 1489   | 25872070 | 25872270 |
| 15 | 25870581 | 25903452 + | NM_025459    | Fam134b | 25470  | 25896051 | 25896251 |
| 15 | 25870581 | 25903452 + | NM_025459    | Fam134b | -8111  | 25862270 | 25862470 |
| 15 | 25872434 | 25903452 + | NM_001277317 | Fam134b | -164   | 25872070 | 25872270 |
| 15 | 25872434 | 25903452 + | NM_001277317 | Fam134b | 23617  | 25896051 | 25896251 |
| 15 | 25872434 | 25903452 + | NM_001277317 | Fam134b | -9964  | 25862270 | 25862470 |
| 15 | 25877982 | 25878043 + | NR_106071    | Mir7212 | -5712  | 25872070 | 25872270 |
| 15 | 27396432 | 27524663 + | NM_020332    | Ank     | 11098  | 27407530 | 27407730 |
| 15 | 27396432 | 27524663 + | NM_020332    | Ank     | 41015  | 27437447 | 27437647 |
| 15 | 27396432 | 27524663 + | NM_020332    | Ank     | 42108  | 27438540 | 27438740 |
| 15 | 27396432 | 27524663 + | NM_020332    | Ank     | 40426  | 27436858 | 27437058 |
| 15 | 27396432 | 27524663 + | NM_020332    | Ank     | 39574  | 27436006 | 27436206 |
| 15 | 27660404 | 27955604 - | NM_001081302 | Trio    | 241983 | 27713421 | 27713621 |
| 15 | 27660404 | 27955604 - | NM_001081302 | Trio    | 58428  | 27896976 | 27897176 |
| 15 | 27660404 | 27955604 - | NM_001081302 | Trio    | 64979  | 27890425 | 27890625 |

|    |          |            |              |          |        |          |          |
|----|----------|------------|--------------|----------|--------|----------|----------|
| 15 | 28133521 | 28401801 + | NM_133365    | Dnah5    | 212584 | 28346105 | 28346305 |
| 15 | 30102348 | 30959099 + | NM_008729    | Ctnnd2   | 189944 | 30292292 | 30292492 |
| 15 | 31154140 | 31204094 + | NM_146057    | Dap      | 1649   | 31155789 | 31155989 |
| 15 | 31221235 | 31297515 - | NM_001164441 | Ankrd33b | 54090  | 31243225 | 31243425 |
| 15 | 31221235 | 31297515 - | NM_027496    | Ankrd33b | 54090  | 31243225 | 31243425 |
| 15 | 31498667 | 31519875 + | NM_181588    | Cmb1     | 15600  | 31514267 | 31514467 |
| 15 | 31498667 | 31519875 + | NM_181588    | Cmb1     | -4394  | 31494073 | 31494273 |
| 15 | 31498667 | 31519875 + | NM_181588    | Cmb1     | 993    | 31499660 | 31499860 |
| 15 | 32174568 | 32626097 + | NM_009154    | Sema5a   | 392055 | 32566623 | 32566823 |
| 15 | 32174568 | 32626097 + | NM_009154    | Sema5a   | 186265 | 32360833 | 32361033 |
| 15 | 32174568 | 32626097 + | NM_009154    | Sema5a   | 297436 | 32472004 | 32472204 |
| 15 | 32174568 | 32626097 + | NM_009154    | Sema5a   | 85789  | 32260357 | 32260557 |
| 15 | 33012884 | 33524308 + | NM_018755    | Cpq      | 383274 | 33396158 | 33396358 |
| 15 | 33012884 | 33524308 + | NM_176073    | Cpq      | 383274 | 33396158 | 33396358 |
| 15 | 34012474 | 34072141 + | NM_026002    | Mtdh     | 962    | 34013436 | 34013636 |
| 15 | 34236436 | 34365996 + | NM_016762    | Matn2    | 61211  | 34297647 | 34297847 |
| 15 | 34236436 | 34365996 + | NM_016762    | Matn2    | 98174  | 34334610 | 34334810 |
| 15 | 34236436 | 34365996 + | NM_016762    | Matn2    | 30872  | 34267308 | 34267508 |
| 15 | 34805254 | 35085562 - | NM_019635    | Stk3     | 144325 | 34941037 | 34941237 |
| 15 | 34805254 | 35085562 - | NM_019635    | Stk3     | 143831 | 34941531 | 34941731 |
| 15 | 34805254 | 35085562 - | NM_019635    | Stk3     | 251465 | 34833897 | 34834097 |
| 15 | 34805254 | 35085562 - | NM_019635    | Stk3     | 188075 | 34897287 | 34897487 |
| 15 | 35236765 | 35258291 - | NR_045280    | BC048602 | 19723  | 35238368 | 35238568 |
| 15 | 35301301 | 35860985 + | NM_177151    | Vps13b   | 278612 | 35579913 | 35580113 |
| 15 | 35301301 | 35860985 + | NM_177151    | Vps13b   | 405533 | 35706834 | 35707034 |
| 15 | 36407423 | 36426547 - | NM_175134    | Ankrd46  | 9378   | 36416969 | 36417169 |
| 15 | 36926782 | 36937158 - | NM_026521    | Zfp706   | -993   | 36938151 | 36938351 |
| 15 | 36926782 | 36937158 - | NM_026521    | Zfp706   | 973    | 36935985 | 36936185 |
| 15 | 37162791 | 37293324 + | NM_026496    | Grhl2    | 90728  | 37253519 | 37253719 |
| 15 | 37162791 | 37293324 + | NM_026496    | Grhl2    | 9976   | 37172767 | 37172967 |

|    |          |            |              |               |        |          |          |
|----|----------|------------|--------------|---------------|--------|----------|----------|
| 15 | 38417185 | 38449022 - | NM_001102458 | Azin1         | 17218  | 38431604 | 38431804 |
| 15 | 38417185 | 38449022 - | NM_001301688 | Azin1         | 17218  | 38431604 | 38431804 |
| 15 | 38417185 | 38449022 - | NM_018745    | Azin1         | 17218  | 38431604 | 38431804 |
| 15 | 38417185 | 38449022 - | NR_125913    | Azin1         | 17218  | 38431604 | 38431804 |
| 15 | 38479099 | 38524690 - | NR_045757    | 2310043O21Rik | 27095  | 38497395 | 38497595 |
| 15 | 38479099 | 38524690 - | NR_045757    | 2310043O21Rik | 25570  | 38498920 | 38499120 |
| 15 | 38837826 | 38869737 + | NM_001162494 | Fzd6          | 3781   | 38841607 | 38841807 |
| 15 | 38837879 | 38869737 + | NM_008056    | Fzd6          | 3728   | 38841607 | 38841807 |
| 15 | 39702149 | 39775304 - | NM_172814    | Lrp12         | -945   | 39776249 | 39776449 |
| 15 | 39702149 | 39775304 - | NM_172814    | Lrp12         | 3763   | 39771341 | 39771541 |
| 15 | 39702149 | 39775304 - | NM_172814    | Lrp12         | 641    | 39774463 | 39774663 |
| 15 | 39702149 | 39775304 - | NM_172814    | Lrp12         | 15306  | 39759798 | 39759998 |
| 15 | 39702149 | 39775304 - | NM_172814    | Lrp12         | 45314  | 39729790 | 39729990 |
| 15 | 41279028 | 41692594 + | NM_001130166 | Oxr1          | 377902 | 41656930 | 41657130 |
| 15 | 41620580 | 41692594 + | NM_001130165 | Oxr1          | 36350  | 41656930 | 41657130 |
| 15 | 41621061 | 41692594 + | NM_001130163 | Oxr1          | 35869  | 41656930 | 41657130 |
| 15 | 41621061 | 41692594 + | NM_130885    | Oxr1          | 35869  | 41656930 | 41657130 |
| 15 | 41662504 | 41692594 + | NM_001130164 | Oxr1          | -5374  | 41656930 | 41657130 |
| 15 | 44451187 | 44472573 + | NM_019480    | Ebag9         | 1251   | 44452438 | 44452638 |
| 15 | 47412184 | 48623536 - | NM_001081391 | Csmd3         | 73718  | 48549618 | 48549818 |
| 15 | 52899818 | 53177739 - | NM_010162    | Ext1          | 137272 | 53040267 | 53040467 |
| 15 | 52899818 | 53177739 - | NM_010162    | Ext1          | 19362  | 53158177 | 53158377 |
| 15 | 52899818 | 53177739 - | NM_010162    | Ext1          | 97454  | 53080085 | 53080285 |
| 15 | 52899818 | 53177739 - | NM_010162    | Ext1          | 44782  | 53132757 | 53132957 |
| 15 | 52899818 | 53177739 - | NM_010162    | Ext1          | 127836 | 53049703 | 53049903 |
| 15 | 52899818 | 53177739 - | NM_010162    | Ext1          | 134837 | 53042702 | 53042902 |
| 15 | 52899818 | 53177739 - | NM_010162    | Ext1          | 161547 | 53015992 | 53016192 |
| 15 | 52899818 | 53177739 - | NM_010162    | Ext1          | 148705 | 53028834 | 53029034 |
| 15 | 52899818 | 53177739 - | NM_010162    | Ext1          | 143536 | 53034003 | 53034203 |
| 15 | 52899818 | 53177739 - | NM_010162    | Ext1          | 160995 | 53016544 | 53016744 |

|    |          |            |              |             |        |          |          |
|----|----------|------------|--------------|-------------|--------|----------|----------|
| 15 | 54402921 | 54434402 + | NM_178920    | Mal2        | 1399   | 54404320 | 54404520 |
| 15 | 54402921 | 54434402 + | NM_178920    | Mal2        | 14289  | 54417210 | 54417410 |
| 15 | 54907656 | 54922034 - | NM_183089    | Dscc1       | -5477  | 54927511 | 54927711 |
| 15 | 54931472 | 54945138 - | NR_045093    | Gm9920      | 12319  | 54932619 | 54932819 |
| 15 | 54943872 | 55090829 + | NM_145470    | Deptor      | 38111  | 54981983 | 54982183 |
| 15 | 54943872 | 55090829 + | NM_145470    | Deptor      | 62073  | 55005945 | 55006145 |
| 15 | 54964991 | 55090829 + | NM_001037937 | Deptor      | 16992  | 54981983 | 54982183 |
| 15 | 54964991 | 55090829 + | NM_001037937 | Deptor      | 40954  | 55005945 | 55006145 |
| 15 | 55139305 | 55352359 + | NM_181277    | Col14a1     | 0      | 55139222 | 55139422 |
| 15 | 55470709 | 55738505 - | NM_016667    | Sntb1       | 213035 | 55525270 | 55525470 |
| 15 | 56497182 | 56526102 - | NM_008216    | Has2        | 3042   | 56522860 | 56523060 |
| 15 | 56521499 | 56526016 + | NR_002874    | Has2os      | 1361   | 56522860 | 56523060 |
| 15 | 57526222 | 57671388 + | NM_199449    | Zhx2        | 10490  | 57536712 | 57536912 |
| 15 | 57701057 | 57723974 - | NM_024207    | Derl1       | 1089   | 57722685 | 57722885 |
| 15 | 57743754 | 57801624 + | NM_001081396 | Tbc1d31     | 39686  | 57783440 | 57783640 |
| 15 | 57743754 | 57790958 + | NM_001167679 | Tbc1d31     | 39686  | 57783440 | 57783640 |
| 15 | 57925602 | 57966638 - | NM_027435    | Atad2       | 10419  | 57956019 | 57956219 |
| 15 | 58173019 | 58220830 - | NM_027211    | Anxa13      | -6007  | 58226837 | 58227037 |
| 15 | 58247023 | 58289357 + | NM_145959    | D15Ertd621e | -2457  | 58244366 | 58244566 |
| 15 | 58247023 | 58289357 + | NM_145959    | D15Ertd621e | 17120  | 58264143 | 58264343 |
| 15 | 58247023 | 58289357 + | NM_145959    | D15Ertd621e | 10256  | 58257279 | 58257479 |
| 15 | 58247023 | 58289357 + | NM_145959    | D15Ertd621e | -6177  | 58240646 | 58240846 |
| 15 | 58247023 | 58289357 + | NM_145959    | D15Ertd621e | -4825  | 58241998 | 58242198 |
| 15 | 58613824 | 58654983 - | NM_175212    | Tmem65      | 18719  | 58636064 | 58636264 |
| 15 | 58721708 | 58765286 - | NM_175151    | Tatdn1      | 782    | 58764304 | 58764504 |
| 15 | 58721708 | 58765286 - | NM_175151    | Tatdn1      | 13341  | 58751745 | 58751945 |
| 15 | 58721708 | 58765286 - | NM_175151    | Tatdn1      | 2035   | 58763051 | 58763251 |
| 15 | 58765365 | 58771045 + | NM_023172    | Ndufb9      | -861   | 58764304 | 58764504 |
| 15 | 58765365 | 58771045 + | NM_023172    | Ndufb9      | -2114  | 58763051 | 58763251 |
| 15 | 59205753 | 59371222 + | NM_001164604 | Nsmce2      | 164463 | 59370216 | 59370416 |

|    |          |            |              |               |        |          |          |
|----|----------|------------|--------------|---------------|--------|----------|----------|
| 15 | 59205753 | 59371222 + | NM_001164604 | Nsmce2        | 56461  | 59262214 | 59262414 |
| 15 | 59205753 | 59371222 + | NM_001164604 | Nsmce2        | 144563 | 59350316 | 59350516 |
| 15 | 59205753 | 59371222 + | NM_001164604 | Nsmce2        | 145767 | 59351520 | 59351720 |
| 15 | 59205753 | 59371222 + | NM_001164604 | Nsmce2        | 138059 | 59343812 | 59344012 |
| 15 | 59205753 | 59371222 + | NM_001164604 | Nsmce2        | 49586  | 59255339 | 59255539 |
| 15 | 59205753 | 59371222 + | NM_001164604 | Nsmce2        | 55793  | 59261546 | 59261746 |
| 15 | 59205753 | 59371222 + | NM_001164604 | Nsmce2        | 38142  | 59243895 | 59244095 |
| 15 | 59205753 | 59371222 + | NM_001164604 | Nsmce2        | 23266  | 59229019 | 59229219 |
| 15 | 59205753 | 59433240 + | NM_026746    | Nsmce2        | 164463 | 59370216 | 59370416 |
| 15 | 59205753 | 59433240 + | NM_026746    | Nsmce2        | 56461  | 59262214 | 59262414 |
| 15 | 59205753 | 59433240 + | NM_026746    | Nsmce2        | 144563 | 59350316 | 59350516 |
| 15 | 59205753 | 59433240 + | NM_026746    | Nsmce2        | 145767 | 59351520 | 59351720 |
| 15 | 59205753 | 59433240 + | NM_026746    | Nsmce2        | 138059 | 59343812 | 59344012 |
| 15 | 59205753 | 59433240 + | NM_026746    | Nsmce2        | 49586  | 59255339 | 59255539 |
| 15 | 59205753 | 59433240 + | NM_026746    | Nsmce2        | 55793  | 59261546 | 59261746 |
| 15 | 59205753 | 59433240 + | NM_026746    | Nsmce2        | 38142  | 59243895 | 59244095 |
| 15 | 59205753 | 59433240 + | NM_026746    | Nsmce2        | 23266  | 59229019 | 59229219 |
| 15 | 59480209 | 59488655 + | NM_144549    | Trib1         | 3697   | 59483906 | 59484106 |
| 15 | 59480209 | 59488655 + | NM_144549    | Trib1         | -614   | 59479395 | 59479595 |
| 15 | 60650551 | 60656636 - | NM_001162926 | Fam84b        | 2564   | 60653872 | 60654072 |
| 15 | 60654520 | 60662956 + | NR_030696    | 9930014A18Rik | -448   | 60653872 | 60654072 |
| 15 | 60654520 | 60662956 + | NR_030696    | 9930014A18Rik | -6448  | 60647872 | 60648072 |
| 15 | 61530839 | 61606007 - | NR_040350    | D030024E09Rik | -8431  | 61614438 | 61614638 |
| 15 | 61869542 | 62082531 + | NR_003368    | Pvt1          | -5164  | 61864178 | 61864378 |
| 15 | 61869542 | 62082531 + | NR_003368    | Pvt1          | 185207 | 62054749 | 62054949 |
| 15 | 61869542 | 62082531 + | NR_003368    | Pvt1          | 3182   | 61872724 | 61872924 |
| 15 | 62049096 | 62051007 - | NR_003523    | H2afy3        | -3742  | 62054749 | 62054949 |
| 15 | 63760649 | 63892011 - | NM_144846    | Fam49b        | 85493  | 63806318 | 63806518 |
| 15 | 63918402 | 64214482 - | NM_001276461 | Asap1         | 34133  | 64180149 | 64180349 |
| 15 | 63918402 | 64214482 - | NM_001276461 | Asap1         | 10685  | 64203597 | 64203797 |

|    |          |            |              |         |        |          |          |
|----|----------|------------|--------------|---------|--------|----------|----------|
| 15 | 63918402 | 64214482 - | NM_001276461 | Asap1   | 219083 | 63995199 | 63995399 |
| 15 | 63918402 | 64214482 - | NM_001276461 | Asap1   | 70840  | 64143442 | 64143642 |
| 15 | 63918402 | 64214482 - | NM_001276461 | Asap1   | 48638  | 64165644 | 64165844 |
| 15 | 63918402 | 64214482 - | NM_001276461 | Asap1   | 81933  | 64132349 | 64132549 |
| 15 | 63918402 | 64144236 - | NM_001276462 | Asap1   | 148837 | 63995199 | 63995399 |
| 15 | 63918402 | 64144236 - | NM_001276462 | Asap1   | 594    | 64143442 | 64143642 |
| 15 | 63918402 | 64144236 - | NM_001276462 | Asap1   | 11687  | 64132349 | 64132549 |
| 15 | 63918402 | 64144236 - | NM_001276463 | Asap1   | 148837 | 63995199 | 63995399 |
| 15 | 63918402 | 64144236 - | NM_001276463 | Asap1   | 594    | 64143442 | 64143642 |
| 15 | 63918402 | 64144236 - | NM_001276463 | Asap1   | 11687  | 64132349 | 64132549 |
| 15 | 63918402 | 64214482 - | NM_001276467 | Asap1   | 34133  | 64180149 | 64180349 |
| 15 | 63918402 | 64214482 - | NM_001276467 | Asap1   | 10685  | 64203597 | 64203797 |
| 15 | 63918402 | 64214482 - | NM_001276467 | Asap1   | 219083 | 63995199 | 63995399 |
| 15 | 63918402 | 64214482 - | NM_001276467 | Asap1   | 70840  | 64143442 | 64143642 |
| 15 | 63918402 | 64214482 - | NM_001276467 | Asap1   | 48638  | 64165644 | 64165844 |
| 15 | 63918402 | 64214482 - | NM_001276467 | Asap1   | 81933  | 64132349 | 64132549 |
| 15 | 63918402 | 64214482 - | NM_010026    | Asap1   | 34133  | 64180149 | 64180349 |
| 15 | 63918402 | 64214482 - | NM_010026    | Asap1   | 10685  | 64203597 | 64203797 |
| 15 | 63918402 | 64214482 - | NM_010026    | Asap1   | 219083 | 63995199 | 63995399 |
| 15 | 63918402 | 64214482 - | NM_010026    | Asap1   | 70840  | 64143442 | 64143642 |
| 15 | 63918402 | 64214482 - | NM_010026    | Asap1   | 48638  | 64165644 | 64165844 |
| 15 | 63918402 | 64214482 - | NM_010026    | Asap1   | 81933  | 64132349 | 64132549 |
| 15 | 66502332 | 66682283 + | NM_009375    | Tg      | 147795 | 66650127 | 66650327 |
| 15 | 66612381 | 66663392 - | NM_001029841 | Sla     | 13065  | 66650127 | 66650327 |
| 15 | 66612381 | 66663392 - | NM_009192    | Sla     | 13065  | 66650127 | 66650327 |
| 15 | 66760880 | 66801204 - | NM_008681    | Ndrg1   | 8320   | 66792684 | 66792884 |
| 15 | 66934437 | 67008445 - | NM_009177    | St3gal1 | 47718  | 66960527 | 66960727 |
| 15 | 67915300 | 68090419 - | NM_001145888 | Zfat    | 134851 | 67955368 | 67955568 |
| 15 | 67915300 | 68090419 - | NM_198644    | Zfat    | 134851 | 67955368 | 67955568 |
| 15 | 72420050 | 72886243 - | NM_029640    | Trappc9 | 49802  | 72836241 | 72836441 |

|    |          |            |              |         |        |          |          |
|----|----------|------------|--------------|---------|--------|----------|----------|
| 15 | 72420050 | 72886243 - | NM_029640    | Trappc9 | 181424 | 72704619 | 72704819 |
| 15 | 72420050 | 72886243 - | NM_029640    | Trappc9 | 84240  | 72801803 | 72802003 |
| 15 | 72420050 | 72886243 - | NM_029640    | Trappc9 | 389768 | 72496275 | 72496475 |
| 15 | 72420050 | 72886243 - | NM_029640    | Trappc9 | 434105 | 72451938 | 72452138 |
| 15 | 72420050 | 72891635 - | NM_180662    | Trappc9 | 55194  | 72836241 | 72836441 |
| 15 | 72420050 | 72891635 - | NM_180662    | Trappc9 | 186816 | 72704619 | 72704819 |
| 15 | 72420050 | 72891635 - | NM_180662    | Trappc9 | 89632  | 72801803 | 72802003 |
| 15 | 72420050 | 72891635 - | NM_180662    | Trappc9 | 395160 | 72496275 | 72496475 |
| 15 | 72420050 | 72891635 - | NM_180662    | Trappc9 | 439497 | 72451938 | 72452138 |
| 15 | 72629954 | 72891635 - | NM_001164641 | Trappc9 | 55194  | 72836241 | 72836441 |
| 15 | 72629954 | 72891635 - | NM_001164641 | Trappc9 | 186816 | 72704619 | 72704819 |
| 15 | 72629954 | 72891635 - | NM_001164641 | Trappc9 | 89632  | 72801803 | 72802003 |
| 15 | 72682599 | 72891635 - | NM_001164642 | Trappc9 | 55194  | 72836241 | 72836441 |
| 15 | 72682599 | 72891635 - | NM_001164642 | Trappc9 | 186816 | 72704619 | 72704819 |
| 15 | 72682599 | 72891635 - | NM_001164642 | Trappc9 | 89632  | 72801803 | 72802003 |
| 15 | 72824247 | 72891635 - | NM_001164643 | Trappc9 | 55194  | 72836241 | 72836441 |
| 15 | 72932055 | 73015378 - | NM_153178    | Ago2    | 57067  | 72958111 | 72958311 |
| 15 | 72932055 | 73015378 - | NM_153178    | Ago2    | 66250  | 72948928 | 72949128 |
| 15 | 73035535 | 73253622 - | NM_007982    | Ptk2    | 166231 | 73087191 | 73087391 |
| 15 | 73035535 | 73253622 - | NM_007982    | Ptk2    | 100000 | 73153422 | 73153622 |
| 15 | 73035535 | 73253622 - | NM_007982    | Ptk2    | 139011 | 73114411 | 73114611 |
| 15 | 73035535 | 73253622 - | NM_007982    | Ptk2    | 152554 | 73100868 | 73101068 |
| 15 | 73035535 | 73253622 - | NM_007982    | Ptk2    | 187082 | 73066340 | 73066540 |
| 15 | 73045987 | 73253622 - | NM_001130409 | Ptk2    | 166231 | 73087191 | 73087391 |
| 15 | 73045987 | 73253622 - | NM_001130409 | Ptk2    | 100000 | 73153422 | 73153622 |
| 15 | 73045987 | 73253622 - | NM_001130409 | Ptk2    | 139011 | 73114411 | 73114611 |
| 15 | 73045987 | 73253622 - | NM_001130409 | Ptk2    | 152554 | 73100868 | 73101068 |
| 15 | 73045987 | 73253622 - | NM_001130409 | Ptk2    | 187082 | 73066340 | 73066540 |
| 15 | 73085245 | 73085313 - | NR_029561    | Mir151  | -1878  | 73087191 | 73087391 |
| 15 | 73342990 | 73402673 + | NM_001081066 | Dennd3  | -828   | 73341962 | 73342162 |



|    |          |            |              |               |       |          |          |
|----|----------|------------|--------------|---------------|-------|----------|----------|
| 15 | 73525037 | 73537936 - | NM_173365    | Gpr20         | -4161 | 73542097 | 73542297 |
| 15 | 73553575 | 73589197 + | NM_001166389 | Ptp4a3        | 1979  | 73555554 | 73555754 |
| 15 | 73553575 | 73589197 + | NM_001166390 | Ptp4a3        | 1979  | 73555554 | 73555754 |
| 15 | 73555360 | 73589197 + | NM_001166388 | Ptp4a3        | 194   | 73555554 | 73555754 |
| 15 | 73617366 | 73670102 - | NM_001033365 | Mroh5         | 3843  | 73666059 | 73666259 |
| 15 | 74346626 | 74419895 + | NM_174991    | Adgrb1        | -1748 | 74344678 | 74344878 |
| 15 | 74346626 | 74419895 + | NM_174991    | Adgrb1        | 57976 | 74404602 | 74404802 |
| 15 | 74573269 | 74577118 - | NM_001081961 | 2300005B03Rik | -1779 | 74578897 | 74579097 |
| 15 | 74578286 | 74583410 - | NM_011838    | Lynx1         | 4313  | 74578897 | 74579097 |
| 15 | 74708766 | 74712135 - | NM_025929    | 2010109I03Rik | -1258 | 74713393 | 74713593 |
| 15 | 75584877 | 75672339 - | NM_172121    | Zc3h3         | -2295 | 75674634 | 75674834 |
| 15 | 75584877 | 75672339 - | NM_172121    | Zc3h3         | 36853 | 75635286 | 75635486 |
| 15 | 75584877 | 75672339 - | NM_172121    | Zc3h3         | 10115 | 75662024 | 75662224 |
| 15 | 75692769 | 75697835 + | NM_026960    | Gsdmd         | -8087 | 75684482 | 75684682 |
| 15 | 75713364 | 75719154 - | NM_001282443 | Mroh6         | -5595 | 75724749 | 75724949 |
| 15 | 75721394 | 75724912 - | NM_172607    | Naprt         | 0     | 75724749 | 75724949 |
| 15 | 75799615 | 75806296 + | NM_001081065 | Zfp707        | 476   | 75800091 | 75800291 |
| 15 | 75949948 | 75956987 - | NM_001142968 | BC024139      | -9253 | 75966240 | 75966440 |
| 15 | 76001404 | 76036752 - | NM_001163540 | Plec          | 9652  | 76026900 | 76027100 |
| 15 | 76001404 | 76061809 - | NM_001163542 | Plec          | 34709 | 76026900 | 76027100 |
| 15 | 76001404 | 76030266 - | NM_001163549 | Plec          | 3166  | 76026900 | 76027100 |
| 15 | 76001404 | 76038684 - | NM_001164203 | Plec          | 11584 | 76026900 | 76027100 |
| 15 | 76001404 | 76061809 - | NM_011117    | Plec          | 34709 | 76026900 | 76027100 |
| 15 | 76001404 | 76059928 - | NM_201385    | Plec          | 32828 | 76026900 | 76027100 |
| 15 | 76001404 | 76039596 - | NM_201386    | Plec          | 12496 | 76026900 | 76027100 |
| 15 | 76001404 | 76039084 - | NM_201387    | Plec          | 11984 | 76026900 | 76027100 |
| 15 | 76001404 | 76038684 - | NM_201388    | Plec          | 11584 | 76026900 | 76027100 |
| 15 | 76001404 | 76036752 - | NM_201389    | Plec          | 9652  | 76026900 | 76027100 |
| 15 | 76001404 | 76031038 - | NM_201390    | Plec          | 3938  | 76026900 | 76027100 |
| 15 | 76001404 | 76030266 - | NM_201391    | Plec          | 3166  | 76026900 | 76027100 |

|    |          |            |              |          |       |          |          |
|----|----------|------------|--------------|----------|-------|----------|----------|
| 15 | 76001404 | 76029837 - | NM_201392    | Plec     | 2737  | 76026900 | 76027100 |
| 15 | 76001404 | 76028640 - | NM_201393    | Plec     | 1540  | 76026900 | 76027100 |
| 15 | 76001404 | 76026141 - | NM_201394    | Plec     | -759  | 76026900 | 76027100 |
| 15 | 76097217 | 76100270 - | NR_045747    | Gm10872  | 671   | 76099399 | 76099599 |
| 15 | 76097217 | 76100270 - | NR_045747    | Gm10872  | 0     | 76100231 | 76100431 |
| 15 | 76098519 | 76123003 + | NM_028852    | Spatc1   | 880   | 76099399 | 76099599 |
| 15 | 76098519 | 76123003 + | NM_028852    | Spatc1   | 1712  | 76100231 | 76100431 |
| 15 | 76127033 | 76137676 - | NM_153122    | Oplah    | -4204 | 76141880 | 76142080 |
| 15 | 76210943 | 76283470 + | NM_175457    | Mroh1    | 8402  | 76219345 | 76219545 |
| 15 | 76220461 | 76270175 + | NM_001162489 | Mroh1    | -916  | 76219345 | 76219545 |
| 15 | 76332445 | 76342249 - | NM_010046    | Dgat1    | 5986  | 76336063 | 76336263 |
| 15 | 76332445 | 76342249 - | NM_010046    | Dgat1    | 1089  | 76340960 | 76341160 |
| 15 | 76366158 | 76369177 - | NM_013909    | Fbxl6    | -7031 | 76376208 | 76376408 |
| 15 | 76406789 | 76426242 + | NM_172960    | Adck5    | 2486  | 76409275 | 76409475 |
| 15 | 76406789 | 76426242 + | NR_073123    | Adck5    | 2486  | 76409275 | 76409475 |
| 15 | 76442813 | 76447283 - | NM_028064    | Slc39a4  | -9967 | 76457250 | 76457450 |
| 15 | 76442813 | 76447283 - | NM_028064    | Slc39a4  | -741  | 76448024 | 76448224 |
| 15 | 76452516 | 76456515 - | NM_001305668 | Vps28    | -735  | 76457250 | 76457450 |
| 15 | 76452516 | 76456515 - | NM_025842    | Vps28    | -735  | 76457250 | 76457450 |
| 15 | 76456667 | 76470360 - | NM_183091    | Tonsl    | 12910 | 76457250 | 76457450 |
| 15 | 76502110 | 76525346 + | NM_033371    | Ppp1r16a | 18674 | 76520784 | 76520984 |
| 15 | 76527194 | 76530106 + | NM_182805    | Gpt      | -6210 | 76520784 | 76520984 |
| 15 | 76554415 | 76648601 - | NM_001168288 | Arhgap39 | 9413  | 76638988 | 76639188 |
| 15 | 76554415 | 76648601 - | NM_198420    | Arhgap39 | 9413  | 76638988 | 76639188 |
| 15 | 76734501 | 76736749 + | NM_012053    | Rpl8     | 0     | 76734414 | 76734614 |
| 15 | 76909420 | 77137484 - | NM_001110827 | Rbfox2   | 85818 | 77051466 | 77051666 |
| 15 | 76909420 | 77137484 - | NM_053104    | Rbfox2   | 85818 | 77051466 | 77051666 |
| 15 | 76909420 | 77137484 - | NM_175387    | Rbfox2   | 85818 | 77051466 | 77051666 |
| 15 | 77218647 | 77229541 - | NM_001164640 | Apol7a   | -6643 | 77236184 | 77236384 |
| 15 | 77218647 | 77229541 - | NM_029419    | Apol7a   | -6643 | 77236184 | 77236384 |

|    |          |            |                |          |       |          |          |
|----|----------|------------|----------------|----------|-------|----------|----------|
| 15 | 77234219 | 77241511 - | NM_001162883   | Apol9a   | 5127  | 77236184 | 77236384 |
| 15 | 77234219 | 77241465 - | NM_173786      | Apol9a   | 5081  | 77236184 | 77236384 |
| 15 | 77252639 | 77277891 - | NM_001024848.1 | Apol7b   | 18465 | 77259226 | 77259426 |
| 15 | 77307477 | 77321500 + | NM_177744      | Apol10a  | 5160  | 77312637 | 77312837 |
| 15 | 77307477 | 77321500 + | NM_177744      | Apol10a  | -2039 | 77305238 | 77305438 |
| 15 | 77559502 | 77566813 + | NM_173743      | Apol9b   | 5123  | 77564625 | 77564825 |
| 15 | 77559551 | 77566813 + | NM_001168660   | Apol9b   | 5074  | 77564625 | 77564825 |
| 15 | 77591015 | 77672606 - | NM_022410      | Myh9     | 25501 | 77646905 | 77647105 |
| 15 | 77591015 | 77672606 - | NM_022410      | Myh9     | 19731 | 77652675 | 77652875 |
| 15 | 77591015 | 77672606 - | NM_022410      | Myh9     | 21348 | 77651058 | 77651258 |
| 15 | 77591015 | 77672606 - | NM_022410      | Myh9     | 33580 | 77638826 | 77639026 |
| 15 | 77789428 | 77801255 - | NM_018749      | Eif3d    | -327  | 77801582 | 77801782 |
| 15 | 78208830 | 78226343 - | NM_001163612   | Tex33    | 72    | 78226071 | 78226271 |
| 15 | 78208830 | 78219200 - | NM_001163613   | Tex33    | -6871 | 78226071 | 78226271 |
| 15 | 78208830 | 78226343 - | NM_028522      | Tex33    | 72    | 78226071 | 78226271 |
| 15 | 78500437 | 78548544 - | NM_183141      | Elfn2    | -3237 | 78551781 | 78551981 |
| 15 | 78673077 | 78681333 + | NM_027219      | Cdc42ep1 | 7829  | 78680906 | 78681106 |
| 15 | 78673077 | 78681333 + | NM_027219      | Cdc42ep1 | 2671  | 78675748 | 78675948 |
| 15 | 78707620 | 78725016 + | NM_145929      | Gga1     | -477  | 78706943 | 78707143 |
| 15 | 78730216 | 78742483 + | NM_009164      | Sh3bp1   | -2595 | 78727421 | 78727621 |
| 15 | 78883524 | 78893290 - | NM_144849      | Ankrd54  | -5697 | 78898987 | 78899187 |
| 15 | 78883524 | 78893290 - | NM_144849      | Ankrd54  | -4869 | 78898159 | 78898359 |
| 15 | 78905653 | 78924831 + | NM_145139      | Eif3l    | -6466 | 78898987 | 78899187 |
| 15 | 78905653 | 78924831 + | NM_145139      | Eif3l    | -7294 | 78898159 | 78898359 |
| 15 | 78996496 | 79046832 + | NR_029470      | Gm10863  | 21853 | 79018349 | 79018549 |
| 15 | 79088625 | 79115940 - | NM_177580      | Baiap2l2 | 5527  | 79110213 | 79110413 |
| 15 | 79116658 | 79158802 - | NM_001199023   | Pla2g6   | 5627  | 79152975 | 79153175 |
| 15 | 79116658 | 79158802 - | NM_001199023   | Pla2g6   | 6195  | 79152407 | 79152607 |
| 15 | 79116658 | 79158802 - | NM_001199024   | Pla2g6   | 5627  | 79152975 | 79153175 |
| 15 | 79116658 | 79158802 - | NM_001199024   | Pla2g6   | 6195  | 79152407 | 79152607 |

|    |          |            |              |               |        |          |          |
|----|----------|------------|--------------|---------------|--------|----------|----------|
| 15 | 79116658 | 79158802 - | NM_001199025 | Pla2g6        | 5627   | 79152975 | 79153175 |
| 15 | 79116658 | 79158802 - | NM_001199025 | Pla2g6        | 6195   | 79152407 | 79152607 |
| 15 | 79116658 | 79158802 - | NM_016915    | Pla2g6        | 5627   | 79152975 | 79153175 |
| 15 | 79116658 | 79158802 - | NM_016915    | Pla2g6        | 6195   | 79152407 | 79152607 |
| 15 | 79908211 | 79913837 - | NM_013762    | Rpl3          | -6124  | 79919961 | 79920161 |
| 15 | 79908211 | 79913837 - | NM_013762    | Rpl3          | 0      | 79913651 | 79913851 |
| 15 | 79908933 | 79909010 - | NR_028282    | Snord83b      | -4641  | 79913651 | 79913851 |
| 15 | 79913289 | 79913337 - | NR_028281    | Snord43       | -6624  | 79919961 | 79920161 |
| 15 | 79913289 | 79913337 - | NR_028281    | Snord43       | -314   | 79913651 | 79913851 |
| 15 | 79921764 | 79943871 + | NM_009303    | Syngn1        | -1603  | 79919961 | 79920161 |
| 15 | 79921764 | 79943871 + | NM_009303    | Syngn1        | -7913  | 79913651 | 79913851 |
| 15 | 79921764 | 79949932 + | NM_207708    | Syngn1        | -1603  | 79919961 | 79920161 |
| 15 | 79921764 | 79949932 + | NM_207708    | Syngn1        | -7913  | 79913651 | 79913851 |
| 15 | 80004151 | 80045950 + | NM_010795    | Mgat3         | -7775  | 79996176 | 79996376 |
| 15 | 80004151 | 80045950 + | NM_010795    | Mgat3         | 15083  | 80019234 | 80019434 |
| 15 | 80064510 | 80083802 + | NM_178719    | Mief1         | 16553  | 80081063 | 80081263 |
| 15 | 80064510 | 80083802 + | NM_178719    | Mief1         | 4932   | 80069442 | 80069642 |
| 15 | 80085614 | 80087976 + | NM_001287180 | Atf4          | -4351  | 80081063 | 80081263 |
| 15 | 80085614 | 80087976 + | NM_001287180 | Atf4          | -857   | 80084557 | 80084757 |
| 15 | 80085614 | 80087976 + | NM_009716    | Atf4          | -4351  | 80081063 | 80081263 |
| 15 | 80085614 | 80087976 + | NM_009716    | Atf4          | -857   | 80084557 | 80084757 |
| 15 | 80403027 | 80483285 + | NM_001289442 | Grap2         | 10465  | 80413492 | 80413692 |
| 15 | 80502277 | 80530856 + | NM_145986    | Fam83f        | 16864  | 80519141 | 80519341 |
| 15 | 80502277 | 80530856 + | NM_145986    | Fam83f        | 2962   | 80505239 | 80505439 |
| 15 | 80521455 | 80528041 - | NR_045309    | A430088P11Rik | -9659  | 80537700 | 80537900 |
| 15 | 80521455 | 80528041 - | NR_045310    | A430088P11Rik | -9659  | 80537700 | 80537900 |
| 15 | 80541743 | 80771517 + | NM_144812    | Tnrc6b        | 199569 | 80741312 | 80741512 |
| 15 | 80541743 | 80771517 + | NM_144812    | Tnrc6b        | 223657 | 80765400 | 80765600 |
| 15 | 80541743 | 80771517 + | NM_144812    | Tnrc6b        | 10410  | 80552153 | 80552353 |
| 15 | 80541743 | 80771517 + | NM_144812    | Tnrc6b        | 119978 | 80661721 | 80661921 |

|    |          |            |              |               |        |          |          |
|----|----------|------------|--------------|---------------|--------|----------|----------|
| 15 | 80541743 | 80771517 + | NM_144812    | Tnrc6b        | 196289 | 80738032 | 80738232 |
| 15 | 80541743 | 80771517 + | NM_144812    | Tnrc6b        | 98663  | 80640406 | 80640606 |
| 15 | 80541743 | 80771517 + | NM_144812    | Tnrc6b        | -3843  | 80537700 | 80537900 |
| 15 | 80541743 | 80771517 + | NM_144812    | Tnrc6b        | 9070   | 80550813 | 80551013 |
| 15 | 80629040 | 80771517 + | NM_177124    | Tnrc6b        | 112272 | 80741312 | 80741512 |
| 15 | 80629040 | 80771517 + | NM_177124    | Tnrc6b        | 136360 | 80765400 | 80765600 |
| 15 | 80629040 | 80771517 + | NM_177124    | Tnrc6b        | 32681  | 80661721 | 80661921 |
| 15 | 80629040 | 80771517 + | NM_177124    | Tnrc6b        | 108992 | 80738032 | 80738232 |
| 15 | 80629040 | 80771517 + | NM_177124    | Tnrc6b        | 11366  | 80640406 | 80640606 |
| 15 | 80770469 | 80770551 + | NR_039573    | Mir5113       | -4869  | 80765400 | 80765600 |
| 15 | 80842711 | 81021188 - | NM_001082536 | Mkl1          | 139975 | 80881013 | 80881213 |
| 15 | 80842711 | 81021188 - | NM_001082536 | Mkl1          | -8756  | 81029944 | 81030144 |
| 15 | 80842711 | 81021188 - | NM_001082536 | Mkl1          | 148708 | 80872280 | 80872480 |
| 15 | 80842711 | 80935478 - | NM_153049    | Mkl1          | 54265  | 80881013 | 80881213 |
| 15 | 80842711 | 80935478 - | NM_153049    | Mkl1          | 62998  | 80872280 | 80872480 |
| 15 | 81073084 | 81078402 - | NR_077229    | 8430426J06Rik | -1199  | 81079601 | 81079801 |
| 15 | 81073084 | 81082293 - | NR_077230    | 8430426J06Rik | 2492   | 81079601 | 81079801 |
| 15 | 81073084 | 81078402 - | NR_077231    | 8430426J06Rik | -1199  | 81079601 | 81079801 |
| 15 | 81149351 | 81191196 - | NM_011399    | Slc25a17      | -7346  | 81198542 | 81198742 |
| 15 | 81149351 | 81191196 - | NM_011399    | Slc25a17      | 4425   | 81186571 | 81186771 |
| 15 | 81195474 | 81230125 - | NM_133726    | St13          | 31383  | 81198542 | 81198742 |
| 15 | 81534678 | 81560350 - | NM_001146174 | Rangap1       | -217   | 81560567 | 81560767 |
| 15 | 81534678 | 81560350 - | NM_011241    | Rangap1       | -217   | 81560567 | 81560767 |
| 15 | 81575278 | 81626700 + | NM_001081016 | Zc3h7b        | 14667  | 81589945 | 81590145 |
| 15 | 81694946 | 81702323 - | NM_026737    | Phf5a         | -384   | 81702707 | 81702907 |
| 15 | 81702893 | 81745568 + | NM_080633    | Aco2          | 11265  | 81714158 | 81714358 |
| 15 | 81702893 | 81745568 + | NM_080633    | Aco2          | 0      | 81702707 | 81702907 |
| 15 | 81781536 | 81791361 - | NM_001282040 | Pmm1          | -302   | 81791663 | 81791863 |
| 15 | 81781536 | 81791361 - | NM_001282041 | Pmm1          | -302   | 81791663 | 81791863 |
| 15 | 81781536 | 81791361 - | NM_013872    | Pmm1          | -302   | 81791663 | 81791863 |

|    |          |            |              |         |       |          |          |
|----|----------|------------|--------------|---------|-------|----------|----------|
| 15 | 81822953 | 81846571 - | NM_134095    | Desi1   | -231  | 81846802 | 81847002 |
| 15 | 81822953 | 81846571 - | NM_134095    | Desi1   | 11633 | 81834738 | 81834938 |
| 15 | 81846799 | 81870515 + | NM_010247    | Xrcc6   | 3     | 81846802 | 81847002 |
| 15 | 82180569 | 82184722 - | NM_025987    | Ndufa6  | -7084 | 82191806 | 82192006 |
| 15 | 82180569 | 82184722 - | NM_025987    | Ndufa6  | 2507  | 82182015 | 82182215 |
| 15 | 82180569 | 82184722 - | NM_025987    | Ndufa6  | 4082  | 82180440 | 82180640 |
| 15 | 82200957 | 82210691 - | NM_001163472 | Cyp2d22 | 488   | 82210003 | 82210203 |
| 15 | 82200957 | 82210691 - | NM_019823    | Cyp2d22 | 488   | 82210003 | 82210203 |
| 15 | 82620537 | 82624676 - | NM_029562    | Cyp2d26 | -110  | 82624786 | 82624986 |
| 15 | 82620537 | 82624676 - | NM_029562    | Cyp2d26 | -1789 | 82626465 | 82626665 |
| 15 | 82639055 | 82742565 - | NM_001114140 | Tcf20   | -2460 | 82745025 | 82745225 |
| 15 | 82639055 | 82742565 - | NM_013836    | Tcf20   | -2460 | 82745025 | 82745225 |
| 15 | 82930635 | 82947102 + | NM_023475    | Serhl   | 1200  | 82931835 | 82932035 |
| 15 | 82930635 | 82947102 + | NM_023475    | Serhl   | -1126 | 82929309 | 82929509 |
| 15 | 82983932 | 83002639 - | NM_029787    | Cyb5r3  | 6811  | 82995628 | 82995828 |
| 15 | 83206037 | 83295037 - | NM_001159509 | Pacsin2 | -4389 | 83299426 | 83299626 |
| 15 | 83206037 | 83295037 - | NM_001159509 | Pacsin2 | 31598 | 83263239 | 83263439 |
| 15 | 83206037 | 83295037 - | NM_001159509 | Pacsin2 | 1887  | 83292950 | 83293150 |
| 15 | 83206037 | 83295037 - | NM_001159509 | Pacsin2 | -2767 | 83297804 | 83298004 |
| 15 | 83206037 | 83295037 - | NM_001159509 | Pacsin2 | 9884  | 83284953 | 83285153 |
| 15 | 83206037 | 83263281 - | NM_001159510 | Pacsin2 | 0     | 83263239 | 83263439 |
| 15 | 83206037 | 83263281 - | NM_011862    | Pacsin2 | 0     | 83263239 | 83263439 |
| 15 | 83314199 | 83341338 - | NM_178869    | Ttll1   | -212  | 83341550 | 83341750 |
| 15 | 83906527 | 83936185 - | NM_013873    | Sult4a1 | -3909 | 83940094 | 83940294 |
| 15 | 84511428 | 84534104 + | NM_146061    | Prr5    | -5414 | 84505814 | 84506014 |
| 15 | 84545059 | 84550697 - | NR_040347    | Gm20556 | -3257 | 84553954 | 84554154 |
| 15 | 84550482 | 84602638 + | NM_001164627 | Arhgap8 | 3472  | 84553954 | 84554154 |
| 15 | 84550482 | 84602638 + | NM_001164628 | Arhgap8 | 3472  | 84553954 | 84554154 |
| 15 | 84550482 | 84602638 + | NM_001205334 | Arhgap8 | 3472  | 84553954 | 84554154 |
| 15 | 84550482 | 84602638 + | NM_028455    | Arhgap8 | 3472  | 84553954 | 84554154 |

|    |          |            |              |            |       |          |          |
|----|----------|------------|--------------|------------|-------|----------|----------|
| 15 | 84615806 | 84686560 - | NM_001081166 | Phf21b     | 26404 | 84659956 | 84660156 |
| 15 | 84615806 | 84686560 - | NR_030731    | Phf21b     | 26404 | 84659956 | 84660156 |
| 15 | 84847571 | 84852991 + | NM_023478    | Upk3a      | -4073 | 84843298 | 84843498 |
| 15 | 85036438 | 85116725 + | NM_010180    | Fbln1      | 2224  | 85038662 | 85038862 |
| 15 | 85036438 | 85116725 + | NM_010180    | Fbln1      | 38428 | 85074866 | 85075066 |
| 15 | 85036438 | 85116725 + | NM_010180    | Fbln1      | 43372 | 85079810 | 85080010 |
| 15 | 85036438 | 85116725 + | NM_010180    | Fbln1      | 25996 | 85062434 | 85062634 |
| 15 | 85036438 | 85116725 + | NM_010180    | Fbln1      | 27279 | 85063717 | 85063917 |
| 15 | 85036438 | 85116725 + | NM_010180    | Fbln1      | 24052 | 85060490 | 85060690 |
| 15 | 85036438 | 85116725 + | NM_010180    | Fbln1      | 10510 | 85046948 | 85047148 |
| 15 | 85166811 | 85294267 + | NM_016843    | Atxn10     | 53662 | 85220473 | 85220673 |
| 15 | 85534203 | 85537955 + | NR_110483    | Lincppara  | -6690 | 85527313 | 85527513 |
| 15 | 85534203 | 85537955 + | NR_110483    | Lincppara  | 820   | 85535023 | 85535223 |
| 15 | 85537033 | 85537128 + | NR_029729    | Mirlet7c-2 | -9520 | 85527313 | 85527513 |
| 15 | 85537033 | 85537128 + | NR_029729    | Mirlet7c-2 | -1810 | 85535023 | 85535223 |
| 15 | 85537749 | 85537834 + | NR_029727    | Mirlet7b   | -2526 | 85535023 | 85535223 |
| 15 | 85565994 | 85637282 + | NM_001113418 | Ppara      | 18630 | 85584624 | 85584824 |
| 15 | 85565994 | 85637282 + | NM_001113418 | Ppara      | 54913 | 85620907 | 85621107 |
| 15 | 85565994 | 85637282 + | NM_001113418 | Ppara      | 38970 | 85604964 | 85605164 |
| 15 | 85565994 | 85637282 + | NM_001113418 | Ppara      | 33544 | 85599538 | 85599738 |
| 15 | 85565994 | 85637282 + | NM_001113418 | Ppara      | 11178 | 85577172 | 85577372 |
| 15 | 85566206 | 85637282 + | NM_011144    | Ppara      | 18418 | 85584624 | 85584824 |
| 15 | 85566206 | 85637282 + | NM_011144    | Ppara      | 54701 | 85620907 | 85621107 |
| 15 | 85566206 | 85637282 + | NM_011144    | Ppara      | 38758 | 85604964 | 85605164 |
| 15 | 85566206 | 85637282 + | NM_011144    | Ppara      | 33332 | 85599538 | 85599738 |
| 15 | 85566206 | 85637282 + | NM_011144    | Ppara      | 10966 | 85577172 | 85577372 |
| 15 | 85637402 | 85642128 - | NM_001164625 | Cdpf1      | 2283  | 85639645 | 85639845 |
| 15 | 85637402 | 85642128 - | NM_001164626 | Cdpf1      | 2283  | 85639645 | 85639845 |
| 15 | 85637402 | 85642128 - | NM_197998    | Cdpf1      | 2283  | 85639645 | 85639845 |
| 15 | 85662734 | 85689253 + | NM_001033337 | Ttc38      | 4658  | 85667392 | 85667592 |

|    |          |            |              |          |        |          |          |
|----|----------|------------|--------------|----------|--------|----------|----------|
| 15 | 85729188 | 85864208 - | NM_009886    | Celsr1   | 26040  | 85837968 | 85838168 |
| 15 | 85729188 | 85864208 - | NM_009886    | Celsr1   | 26585  | 85837423 | 85837623 |
| 15 | 85888125 | 85968067 + | NM_172611    | Gramd4   | 6221   | 85894346 | 85894546 |
| 15 | 85888125 | 85968067 + | NM_172611    | Gramd4   | 37964  | 85926089 | 85926289 |
| 15 | 85888125 | 85968067 + | NM_172611    | Gramd4   | 58687  | 85946812 | 85947012 |
| 15 | 85888125 | 85968067 + | NM_172611    | Gramd4   | 28316  | 85916441 | 85916641 |
| 15 | 85888125 | 85968067 + | NM_172611    | Gramd4   | 7537   | 85895662 | 85895862 |
| 15 | 85888125 | 85968067 + | NM_172611    | Gramd4   | 2228   | 85890353 | 85890553 |
| 15 | 85889157 | 85968067 + | NM_001205353 | Gramd4   | 5189   | 85894346 | 85894546 |
| 15 | 85889157 | 85968067 + | NM_001205353 | Gramd4   | 36932  | 85926089 | 85926289 |
| 15 | 85889157 | 85968067 + | NM_001205353 | Gramd4   | 57655  | 85946812 | 85947012 |
| 15 | 85889157 | 85968067 + | NM_001205353 | Gramd4   | 27284  | 85916441 | 85916641 |
| 15 | 85889157 | 85968067 + | NM_001205353 | Gramd4   | 6505   | 85895662 | 85895862 |
| 15 | 85889157 | 85968067 + | NM_001205353 | Gramd4   | 1196   | 85890353 | 85890553 |
| 15 | 85969531 | 86016572 - | NM_145475    | Cerk     | 26719  | 85989653 | 85989853 |
| 15 | 85969531 | 86016572 - | NM_145475    | Cerk     | 1793   | 86014579 | 86014779 |
| 15 | 85969531 | 86016572 - | NM_145475    | Cerk     | -230   | 86016802 | 86017002 |
| 15 | 85969531 | 86016572 - | NM_145475    | Cerk     | 3938   | 86012434 | 86012634 |
| 15 | 86044889 | 86328934 + | NM_145476    | Tbc1d22a | 63411  | 86108300 | 86108500 |
| 15 | 86044889 | 86328934 + | NM_145476    | Tbc1d22a | 253601 | 86298490 | 86298690 |
| 15 | 86044889 | 86328934 + | NM_145476    | Tbc1d22a | 225093 | 86269982 | 86270182 |
| 15 | 88744328 | 88784849 - | NM_172818    | Ttll8    | -8991  | 88793840 | 88794040 |
| 15 | 88786314 | 88808984 - | NM_133241    | Mlc1     | 14944  | 88793840 | 88794040 |
| 15 | 89012643 | 89026906 - | NM_027081    | Dennd6b  | -57    | 89026963 | 89027163 |
| 15 | 89118667 | 89145743 - | NM_001081030 | Sbf1     | 18097  | 89127446 | 89127646 |
| 15 | 89118667 | 89145743 - | NM_001170561 | Sbf1     | 18097  | 89127446 | 89127646 |
| 15 | 89202068 | 89204250 - | NM_001111288 | Sco2     | -3317  | 89207567 | 89207767 |
| 15 | 89202068 | 89204250 - | NM_001111288 | Sco2     | 238    | 89203812 | 89204012 |
| 15 | 89202362 | 89207469 - | NM_138302    | Tymp     | -98    | 89207567 | 89207767 |
| 15 | 89202362 | 89207469 - | NM_138302    | Tymp     | 3457   | 89203812 | 89204012 |



|    |          |            |              |               |        |          |          |
|----|----------|------------|--------------|---------------|--------|----------|----------|
| 15 | 89207880 | 89209686 - | NM_001013022 | Odf3b         | 1919   | 89207567 | 89207767 |
| 15 | 89217322 | 89219140 + | NM_001160178 | Klhdc7b       | -9555  | 89207567 | 89207767 |
| 15 | 89220605 | 89240935 - | NM_001162880 | Syce3         | 10550  | 89230185 | 89230385 |
| 15 | 89220605 | 89240935 - | NM_001162880 | Syce3         | 12575  | 89228160 | 89228360 |
| 15 | 89220605 | 89240695 - | NM_001162882 | Syce3         | 10310  | 89230185 | 89230385 |
| 15 | 89220605 | 89240695 - | NM_001162882 | Syce3         | 12335  | 89228160 | 89228360 |
| 15 | 89246836 | 89260359 - | NR_004843    | ChkbCpt1b     | 0      | 89260186 | 89260386 |
| 15 | 89246836 | 89256294 - | NM_009948    | Cpt1b         | -3892  | 89260186 | 89260386 |
| 15 | 89256780 | 89260359 - | NM_007692    | Chkb          | 0      | 89260186 | 89260386 |
| 15 | 89256780 | 89260359 - | NR_037153    | Chkb          | 0      | 89260186 | 89260386 |
| 15 | 89256780 | 89260359 - | NR_037154    | Chkb          | 0      | 89260186 | 89260386 |
| 15 | 89284342 | 89292879 + | NM_021921    | Mapk8ip2      | -545   | 89283597 | 89283797 |
| 15 | 89302907 | 89307856 - | NM_009713    | Arsa          | 881    | 89306775 | 89306975 |
| 15 | 89306683 | 89315282 + | NR_077233    | C230037L18Rik | 92     | 89306775 | 89306975 |
| 15 | 90054742 | 90060986 + | NM_001033441 | Alg10b        | -9212  | 90045330 | 90045530 |
| 15 | 90054791 | 90054844 + | NR_106106    | Mir7648       | -9261  | 90045330 | 90045530 |
| 15 | 90763706 | 90880383 - | NM_001109040 | Kif21a        | 42613  | 90837570 | 90837770 |
| 15 | 90763706 | 90880383 - | NM_001109041 | Kif21a        | 42613  | 90837570 | 90837770 |
| 15 | 90763706 | 90880383 - | NM_001109042 | Kif21a        | 42613  | 90837570 | 90837770 |
| 15 | 90763706 | 90880383 - | NM_016705    | Kif21a        | 42613  | 90837570 | 90837770 |
| 15 | 93114264 | 93167367 - | NM_024189    | Yaf2          | 17819  | 93149348 | 93149548 |
| 15 | 93114264 | 93167367 - | NR_028315    | Yaf2          | 17819  | 93149348 | 93149548 |
| 15 | 94353071 | 94373939 - | NM_172437    | Pus7l         | -230   | 94374169 | 94374369 |
| 15 | 94353071 | 94373939 - | NM_172437    | Pus7l         | -2216  | 94376155 | 94376355 |
| 15 | 94374091 | 94398748 + | NM_029926    | Irak4         | 78     | 94374169 | 94374369 |
| 15 | 94374091 | 94398748 + | NM_029926    | Irak4         | 15358  | 94389449 | 94389649 |
| 15 | 94374091 | 94398748 + | NM_029926    | Irak4         | 2064   | 94376155 | 94376355 |
| 15 | 94459616 | 94926529 + | NM_178789    | Tmem117       | 321742 | 94781358 | 94781558 |
| 15 | 94459616 | 94926529 + | NM_178789    | Tmem117       | 327878 | 94787494 | 94787694 |
| 15 | 94459616 | 94926529 + | NM_178789    | Tmem117       | 10942  | 94470558 | 94470758 |

|    |          |            |              |         |        |          |          |
|----|----------|------------|--------------|---------|--------|----------|----------|
| 15 | 94459616 | 94926529 + | NM_178789    | Tmem117 | 35564  | 94495180 | 94495380 |
| 15 | 95621274 | 95805904 + | NM_001253813 | Ano6    | 99607  | 95720881 | 95721081 |
| 15 | 95621274 | 95805904 + | NM_001253813 | Ano6    | 129324 | 95750598 | 95750798 |
| 15 | 95621274 | 95805904 + | NM_001253813 | Ano6    | 114774 | 95736048 | 95736248 |
| 15 | 95621274 | 95805904 + | NM_001253813 | Ano6    | 11260  | 95632534 | 95632734 |
| 15 | 95621274 | 95805904 + | NM_001253813 | Ano6    | 67992  | 95689266 | 95689466 |
| 15 | 95621274 | 95805904 + | NM_001253813 | Ano6    | 81125  | 95702399 | 95702599 |
| 15 | 95621274 | 95805904 + | NM_001253813 | Ano6    | 89730  | 95711004 | 95711204 |
| 15 | 95621274 | 95805904 + | NM_001253813 | Ano6    | 75222  | 95696496 | 95696696 |
| 15 | 95621274 | 95805904 + | NM_001253813 | Ano6    | 33093  | 95654367 | 95654567 |
| 15 | 95621274 | 95805904 + | NM_001253813 | Ano6    | 52723  | 95673997 | 95674197 |
| 15 | 95621274 | 95805904 + | NM_001253813 | Ano6    | 27172  | 95648446 | 95648646 |
| 15 | 95621274 | 95805904 + | NM_001253813 | Ano6    | 24213  | 95645487 | 95645687 |
| 15 | 95621274 | 95805904 + | NM_001253813 | Ano6    | 3955   | 95625229 | 95625429 |
| 15 | 95621274 | 95805904 + | NM_175344    | Ano6    | 99607  | 95720881 | 95721081 |
| 15 | 95621274 | 95805904 + | NM_175344    | Ano6    | 129324 | 95750598 | 95750798 |
| 15 | 95621274 | 95805904 + | NM_175344    | Ano6    | 114774 | 95736048 | 95736248 |
| 15 | 95621274 | 95805904 + | NM_175344    | Ano6    | 11260  | 95632534 | 95632734 |
| 15 | 95621274 | 95805904 + | NM_175344    | Ano6    | 67992  | 95689266 | 95689466 |
| 15 | 95621274 | 95805904 + | NM_175344    | Ano6    | 81125  | 95702399 | 95702599 |
| 15 | 95621274 | 95805904 + | NM_175344    | Ano6    | 89730  | 95711004 | 95711204 |
| 15 | 95621274 | 95805904 + | NM_175344    | Ano6    | 75222  | 95696496 | 95696696 |
| 15 | 95621274 | 95805904 + | NM_175344    | Ano6    | 33093  | 95654367 | 95654567 |
| 15 | 95621274 | 95805904 + | NM_175344    | Ano6    | 52723  | 95673997 | 95674197 |
| 15 | 95621274 | 95805904 + | NM_175344    | Ano6    | 27172  | 95648446 | 95648646 |
| 15 | 95621274 | 95805904 + | NM_175344    | Ano6    | 24213  | 95645487 | 95645687 |
| 15 | 95621274 | 95805904 + | NM_175344    | Ano6    | 3955   | 95625229 | 95625429 |
| 15 | 96117953 | 96235895 + | NM_175251    | Arid2   | 38566  | 96156519 | 96156719 |
| 15 | 96242129 | 96291275 - | NM_028148    | Scaf11  | 21653  | 96269422 | 96269622 |
| 15 | 96401849 | 96472775 - | NM_001166456 | Slc38a1 | 36918  | 96435657 | 96435857 |

|    |          |            |              |               |       |          |          |
|----|----------|------------|--------------|---------------|-------|----------|----------|
| 15 | 96401849 | 96473345 - | NM_001166458 | Slc38a1       | 37488 | 96435657 | 96435857 |
| 15 | 96401849 | 96472394 - | NM_134086    | Slc38a1       | 36537 | 96435657 | 96435857 |
| 15 | 97614796 | 97623124 + | NM_026353    | Slc48a1       | 5752  | 97620548 | 97620748 |
| 15 | 97684858 | 97738728 - | NM_009504    | Vdr           | -9921 | 97748649 | 97748849 |
| 15 | 97684858 | 97738728 - | NM_009504    | Vdr           | 9142  | 97729386 | 97729586 |
| 15 | 97684858 | 97738728 - | NM_009504    | Vdr           | 4653  | 97733875 | 97734075 |
| 15 | 97684858 | 97738728 - | NM_009504    | Vdr           | 28726 | 97709802 | 97710002 |
| 15 | 98373642 | 98398068 - | NM_009833    | Ccnt1         | -1109 | 98399177 | 98399377 |
| 15 | 98397755 | 98401296 + | NR_028442    | 9330020H09Rik | 1422  | 98399177 | 98399377 |
| 15 | 98401435 | 98420020 + | NM_001201322 | 4930415O20Rik | -2058 | 98399177 | 98399377 |
| 15 | 98420421 | 98438065 - | NM_007405    | Adcy6         | 1282  | 98436583 | 98436783 |
| 15 | 99073248 | 99082393 - | NM_001164156 | Mcrs1         | 29    | 99082164 | 99082364 |
| 15 | 99073248 | 99082393 - | NM_016766    | Mcrs1         | 29    | 99082164 | 99082364 |
| 15 | 99082219 | 99092473 + | NR_045627    | 1700120C14Rik | 0     | 99082164 | 99082364 |
| 15 | 99101449 | 99117612 - | NM_001081254 | Fam186b       | 2108  | 99115304 | 99115504 |
| 15 | 99223378 | 99240481 + | NM_001171034 | Tmbim6        | 10416 | 99233794 | 99233994 |
| 15 | 99223378 | 99240481 + | NM_001171034 | Tmbim6        | 753   | 99224131 | 99224331 |
| 15 | 99223378 | 99240481 + | NM_001171034 | Tmbim6        | -5717 | 99217461 | 99217661 |
| 15 | 99223378 | 99240481 + | NM_001171036 | Tmbim6        | 10416 | 99233794 | 99233994 |
| 15 | 99223378 | 99240481 + | NM_001171036 | Tmbim6        | 753   | 99224131 | 99224331 |
| 15 | 99223378 | 99240481 + | NM_001171036 | Tmbim6        | -5717 | 99217461 | 99217661 |
| 15 | 99223378 | 99240481 + | NM_026669    | Tmbim6        | 10416 | 99233794 | 99233994 |
| 15 | 99223378 | 99240481 + | NM_026669    | Tmbim6        | 753   | 99224131 | 99224331 |
| 15 | 99223378 | 99240481 + | NM_026669    | Tmbim6        | -5717 | 99217461 | 99217661 |
| 15 | 99223650 | 99240481 + | NM_001171035 | Tmbim6        | 10144 | 99233794 | 99233994 |
| 15 | 99223650 | 99240481 + | NM_001171035 | Tmbim6        | 481   | 99224131 | 99224331 |
| 15 | 99223650 | 99240481 + | NM_001171035 | Tmbim6        | -5989 | 99217461 | 99217661 |
| 15 | 99252465 | 99288180 - | NM_001001884 | Nckap5l       | 14878 | 99273102 | 99273302 |
| 15 | 99300515 | 99305162 - | NM_029236    | Bcdin3d       | 526   | 99304436 | 99304636 |
| 15 | 99566023 | 99602947 - | NM_028015    | Cers5         | 17917 | 99584830 | 99585030 |

|    |           |             |              |         |        |           |           |
|----|-----------|-------------|--------------|---------|--------|-----------|-----------|
| 15 | 99608899  | 99705888 -  | NM_001113545 | Lima1   | 9627   | 99696061  | 99696261  |
| 15 | 99608899  | 99705888 -  | NM_001113545 | Lima1   | -169   | 99706057  | 99706257  |
| 15 | 99608899  | 99705888 -  | NM_001113545 | Lima1   | 648    | 99705040  | 99705240  |
| 15 | 99608899  | 99705888 -  | NM_001113545 | Lima1   | 9051   | 99696637  | 99696837  |
| 15 | 99608899  | 99705888 -  | NM_001113545 | Lima1   | 42346  | 99663342  | 99663542  |
| 15 | 99608899  | 99705888 -  | NM_001113545 | Lima1   | 39851  | 99665837  | 99666037  |
| 15 | 99800496  | 99846790 +  | NM_001080948 | Larp4   | -3733  | 99796563  | 99796763  |
| 15 | 99800496  | 99846790 +  | NM_001284522 | Larp4   | -3733  | 99796563  | 99796763  |
| 15 | 99803211  | 99846790 +  | NM_001024526 | Larp4   | -6448  | 99796563  | 99796763  |
| 15 | 99803211  | 99846790 +  | NM_001284521 | Larp4   | -6448  | 99796563  | 99796763  |
| 15 | 99803211  | 99846790 +  | NM_001284523 | Larp4   | -6448  | 99796563  | 99796763  |
| 15 | 99869095  | 100049905 + | NM_001159361 | Dip2b   | 73695  | 99942790  | 99942990  |
| 15 | 99869095  | 100049905 + | NM_001159361 | Dip2b   | 136785 | 100005880 | 100006080 |
| 15 | 99869095  | 100049905 + | NM_001159361 | Dip2b   | 117721 | 99986816  | 99987016  |
| 15 | 99984827  | 100049905 + | NM_172819    | Dip2b   | 21053  | 100005880 | 100006080 |
| 15 | 99984827  | 100049905 + | NM_172819    | Dip2b   | 1989   | 99986816  | 99987016  |
| 15 | 100058290 | 100091680 + | NM_007497    | Atf1    | -255   | 100057835 | 100058035 |
| 15 | 100218331 | 100253487 - | NM_008732    | Slc11a2 | 26720  | 100226567 | 100226767 |
| 15 | 100218331 | 100253487 - | NM_008732    | Slc11a2 | 2782   | 100250505 | 100250705 |
| 15 | 100218331 | 100253487 - | NM_008732    | Slc11a2 | 16841  | 100236446 | 100236646 |
| 15 | 100223089 | 100253487 - | NM_001146161 | Slc11a2 | 26720  | 100226567 | 100226767 |
| 15 | 100223089 | 100253487 - | NM_001146161 | Slc11a2 | 2782   | 100250505 | 100250705 |
| 15 | 100223089 | 100253487 - | NM_001146161 | Slc11a2 | 16841  | 100236446 | 100236646 |
| 15 | 100253624 | 100258582 + | NR_040351    | Gm5475  | -2919  | 100250505 | 100250705 |
| 15 | 100451771 | 100467372 - | NM_001033872 | Smagp   | 3427   | 100463745 | 100463945 |
| 15 | 100451771 | 100465991 - | NM_001285413 | Smagp   | 2046   | 100463745 | 100463945 |
| 15 | 100451771 | 100465991 - | NM_001285414 | Smagp   | 2046   | 100463745 | 100463945 |
| 15 | 100451771 | 100467372 - | NM_174992    | Smagp   | 3427   | 100463745 | 100463945 |
| 15 | 100451771 | 100467372 - | NR_104337    | Smagp   | 3427   | 100463745 | 100463945 |
| 15 | 100451771 | 100467372 - | NR_104338    | Smagp   | 3427   | 100463745 | 100463945 |

|    |           |             |              |               |        |           |           |
|----|-----------|-------------|--------------|---------------|--------|-----------|-----------|
| 15 | 100471513 | 100499932 - | NM_001270537 | Bin2          | 17595  | 100482137 | 100482337 |
| 15 | 100479594 | 100479661 - | NR_105926    | Mir6961       | -2476  | 100482137 | 100482337 |
| 15 | 100520346 | 100559808 - | NM_001161767 | Galnt6        | -9058  | 100568866 | 100569066 |
| 15 | 100520346 | 100559808 - | NM_001161767 | Galnt6        | 7046   | 100552562 | 100552762 |
| 15 | 100520346 | 100550909 - | NM_001161768 | Galnt6        | -1653  | 100552562 | 100552762 |
| 15 | 100520346 | 100559808 - | NM_172451    | Galnt6        | -9058  | 100568866 | 100569066 |
| 15 | 100520346 | 100559808 - | NM_172451    | Galnt6        | 7046   | 100552562 | 100552762 |
| 15 | 100560936 | 100563169 - | NR_045781    | I730030J21Rik | -5697  | 100568866 | 100569066 |
| 15 | 100560936 | 100563169 - | NR_045782    | I730030J21Rik | -5697  | 100568866 | 100569066 |
| 15 | 100592178 | 100654403 + | NM_021530    | Slc4a8        | -6545  | 100585433 | 100585633 |
| 15 | 100701076 | 100876370 + | NM_001077499 | Scn8a         | 131460 | 100832536 | 100832736 |
| 15 | 100701076 | 100876370 + | NM_001077499 | Scn8a         | 99400  | 100800476 | 100800676 |
| 15 | 100766702 | 100876370 + | NM_011323    | Scn8a         | 65834  | 100832536 | 100832736 |
| 15 | 100766702 | 100876370 + | NM_011323    | Scn8a         | 33774  | 100800476 | 100800676 |
| 15 | 101051622 | 101054553 - | NR_045326    | A330009N23Rik | -6907  | 101061460 | 101061660 |
| 15 | 101051622 | 101055209 - | NR_045327    | A330009N23Rik | -6251  | 101061460 | 101061660 |
| 15 | 101051622 | 101055618 - | NR_045328    | A330009N23Rik | -5842  | 101061460 | 101061660 |
| 15 | 101054638 | 101063188 + | NM_019518    | Grasp         | 6822   | 101061460 | 101061660 |
| 15 | 101180002 | 101200557 - | NM_028770    | Krt80         | 5326   | 101195031 | 101195231 |
| 15 | 101199783 | 101199866 + | NR_035462    | Mir1941       | -4552  | 101195031 | 101195231 |
| 15 | 101242834 | 101258238 + | NM_033073    | Krt7          | -9169  | 101233465 | 101233665 |
| 15 | 101278176 | 101284341 + | NM_025487    | 1700011A15Rik | 3994   | 101282170 | 101282370 |
| 15 | 101346119 | 101521941 - | NM_016879    | Krt85         | 59191  | 101462550 | 101462750 |
| 15 | 101346119 | 101521941 - | NM_016879    | Krt85         | 68782  | 101452959 | 101453159 |
| 15 | 101346119 | 101521941 - | NM_016879    | Krt85         | 135834 | 101385907 | 101386107 |
| 15 | 101371656 | 101381091 - | NM_053249    | Krt82         | -4816  | 101385907 | 101386107 |
| 15 | 101382787 | 101393382 - | NM_177717    | 4732456N10Rik | 7275   | 101385907 | 101386107 |
| 15 | 101454459 | 101458620 - | NM_001003670 | Gm5414        | -3930  | 101462550 | 101462750 |
| 15 | 101690287 | 101700050 - | NM_001003667 | Krt77         | -6391  | 101706441 | 101706641 |
| 15 | 101748966 | 101755167 - | NM_008475    | Krt4          | 5633   | 101749334 | 101749534 |

|    |           |             |              |         |       |           |           |
|----|-----------|-------------|--------------|---------|-------|-----------|-----------|
| 15 | 101827142 | 101834774 - | NM_031170    | Krt8    | -178  | 101834952 | 101835152 |
| 15 | 101858647 | 101862458 + | NM_010664    | Krt18   | -2944 | 101855503 | 101855703 |
| 15 | 101981006 | 101993868 + | NM_146064    | Soat2   | -754  | 101980052 | 101980252 |
| 15 | 101981006 | 101993868 + | NM_146064    | Soat2   | -32   | 101980774 | 101980974 |
| 15 | 102046426 | 102062367 - | NM_013566    | Itgb7   | -7405 | 102069772 | 102069972 |
| 15 | 102065369 | 102076932 - | NM_001042727 | Rarg    | 6960  | 102069772 | 102069972 |
| 15 | 102065369 | 102076932 - | NM_001042727 | Rarg    | 2220  | 102074512 | 102074712 |
| 15 | 102065369 | 102087954 - | NM_011244    | Rarg    | 17982 | 102069772 | 102069972 |
| 15 | 102065369 | 102087954 - | NM_011244    | Rarg    | 13242 | 102074512 | 102074712 |
| 15 | 102301063 | 102330491 + | NM_001103165 | Pcbp2   | 25211 | 102326274 | 102326474 |
| 15 | 102301063 | 102330491 + | NM_001103166 | Pcbp2   | 25211 | 102326274 | 102326474 |
| 15 | 102301063 | 102330491 + | NM_001174073 | Pcbp2   | 25211 | 102326274 | 102326474 |
| 15 | 102301063 | 102330491 + | NM_011042    | Pcbp2   | 25211 | 102326274 | 102326474 |
| 15 | 102774493 | 102778378 - | NR_047528    | Hotair  | 2441  | 102775737 | 102775937 |
| 15 | 102784957 | 102787133 + | NM_001024842 | Hoxc11  | -9020 | 102775737 | 102775937 |
| 15 | 103021977 | 103070248 - | NM_001076789 | Cbx5    | -531  | 103070779 | 103070979 |
| 15 | 103021977 | 103070248 - | NM_001076789 | Cbx5    | 18668 | 103051380 | 103051580 |
| 15 | 103021977 | 103070248 - | NM_001076789 | Cbx5    | 9681  | 103060367 | 103060567 |
| 15 | 103021977 | 103045784 - | NM_001110216 | Cbx5    | -5596 | 103051380 | 103051580 |
| 15 | 103021977 | 103045784 - | NM_007626    | Cbx5    | -5596 | 103051380 | 103051580 |
| 15 | 103070828 | 103075394 + | NM_001039129 | Hnrnpa1 | 0     | 103070779 | 103070979 |
| 15 | 103070828 | 103075394 + | NM_010447    | Hnrnpa1 | 0     | 103070779 | 103070979 |
| 15 | 103070828 | 103077130 + | NR_104427    | Hnrnpa1 | 0     | 103070779 | 103070979 |
| 15 | 103070863 | 103075016 + | NR_002885    | Gm10052 | 0     | 103070779 | 103070979 |
| 15 | 103070885 | 103075387 + | NR_002883.1  | Gm5643  | 0     | 103070779 | 103070979 |
| 15 | 103078643 | 103082108 - | NM_001302338 | Nfe2    | 1218  | 103080690 | 103080890 |
| 15 | 103078643 | 103083242 - | NM_001302339 | Nfe2    | 2352  | 103080690 | 103080890 |
| 15 | 103078643 | 103082119 - | NM_001302340 | Nfe2    | 1229  | 103080690 | 103080890 |
| 15 | 103078643 | 103088835 - | NM_001302341 | Nfe2    | 7945  | 103080690 | 103080890 |
| 15 | 103078643 | 103083584 - | NM_001302343 | Nfe2    | 2694  | 103080690 | 103080890 |

|    |           |             |              |         |        |           |           |
|----|-----------|-------------|--------------|---------|--------|-----------|-----------|
| 15 | 103078643 | 103085871 - | NM_008685    | Nfe2    | 4981   | 103080690 | 103080890 |
| 15 | 103103349 | 103130296 + | NM_019817    | Copz1   | 3131   | 103106480 | 103106680 |
| 15 | 103103349 | 103130296 + | NM_019817    | Copz1   | 8295   | 103111644 | 103111844 |
| 15 | 103115556 | 103115653 + | NR_029766    | Mir148b | -8876  | 103106480 | 103106680 |
| 15 | 103115556 | 103115653 + | NR_029766    | Mir148b | -3712  | 103111644 | 103111844 |
| 16 | 3884619   | 3904782 +   | NM_001290689 | Naa60   | 11046  | 3895665   | 3895865   |
| 16 | 3884619   | 3904782 +   | NM_029090    | Naa60   | 11046  | 3895665   | 3895865   |
| 16 | 3979106   | 4001679 -   | NM_177472    | Slx4    | 9580   | 3991899   | 3992099   |
| 16 | 4037145   | 4040025 +   | NM_010061    | Dnase1  | -4531  | 4032414   | 4032614   |
| 16 | 4039977   | 4077811 -   | NM_026508    | Trap1   | -742   | 4078553   | 4078753   |
| 16 | 4084048   | 4213405 -   | NM_001025432 | Crebbp  | 112648 | 4100557   | 4100757   |
| 16 | 4284886   | 4420499 -   | NM_001291910 | Adcy9   | 104379 | 4315920   | 4316120   |
| 16 | 4284886   | 4420499 -   | NM_009624    | Adcy9   | 104379 | 4315920   | 4316120   |
| 16 | 4480228   | 4523054 -   | NM_175347    | Srl     | -8447  | 4531501   | 4531701   |
| 16 | 4544661   | 4559721 -   | NM_031182    | Tfap4   | 3928   | 4555593   | 4555793   |
| 16 | 4626884   | 4679721 -   | NM_030205    | Coro7   | -3974  | 4683695   | 4683895   |
| 16 | 4684070   | 4707694 +   | NM_001135112 | Dnaja3  | -175   | 4683695   | 4683895   |
| 16 | 4684070   | 4707694 +   | NM_023646    | Dnaja3  | -175   | 4683695   | 4683895   |
| 16 | 4765461   | 4789936 -   | NM_025670    | Cdip1   | 11408  | 4778328   | 4778528   |
| 16 | 4886100   | 4938297 +   | NM_001252437 | Mgrn1   | 10543  | 4896643   | 4896843   |
| 16 | 4886100   | 4938297 +   | NM_029657    | Mgrn1   | 10543  | 4896643   | 4896843   |
| 16 | 4986951   | 4997946 -   | NM_027669    | Sept12  | -8826  | 5006772   | 5006972   |
| 16 | 4987417   | 4997946 -   | NM_029374    | Sept12  | -8826  | 5006772   | 5006972   |
| 16 | 5007381   | 5008402 +   | NM_001253802 | Smim22  | -409   | 5006772   | 5006972   |
| 16 | 5007381   | 5008402 +   | NM_001253803 | Smim22  | -409   | 5006772   | 5006972   |
| 16 | 5007409   | 5008402 +   | NM_001253796 | Smim22  | -437   | 5006772   | 5006972   |
| 16 | 5007409   | 5008402 +   | NM_001253797 | Smim22  | -437   | 5006772   | 5006972   |
| 16 | 5007409   | 5008402 +   | NR_045595    | Smim22  | -437   | 5006772   | 5006972   |
| 16 | 5007409   | 5008402 +   | NR_045596    | Smim22  | -437   | 5006772   | 5006972   |
| 16 | 5086384   | 5132575 -   | NM_008909    | Ppl     | -2161  | 5134736   | 5134936   |

|    |          |            |              |               |       |          |          |
|----|----------|------------|--------------|---------------|-------|----------|----------|
| 16 | 5147202  | 5184028 +  | NM_001127725 | Sec14I5       | -1109 | 5145893  | 5146093  |
| 16 | 8513522  | 8621661 +  | NM_001170978 | Abat          | 53132 | 8566654  | 8566854  |
| 16 | 8513522  | 8621661 +  | NM_001170978 | Abat          | 90735 | 8604257  | 8604457  |
| 16 | 8513522  | 8621661 +  | NM_001170978 | Abat          | 91278 | 8604800  | 8605000  |
| 16 | 8513522  | 8621661 +  | NM_001170978 | Abat          | 59812 | 8573334  | 8573534  |
| 16 | 8513522  | 8621661 +  | NM_001170978 | Abat          | 12360 | 8525882  | 8526082  |
| 16 | 8513522  | 8621661 +  | NM_172961    | Abat          | 53132 | 8566654  | 8566854  |
| 16 | 8513522  | 8621661 +  | NM_172961    | Abat          | 90735 | 8604257  | 8604457  |
| 16 | 8513522  | 8621661 +  | NM_172961    | Abat          | 91278 | 8604800  | 8605000  |
| 16 | 8513522  | 8621661 +  | NM_172961    | Abat          | 59812 | 8573334  | 8573534  |
| 16 | 8513522  | 8621661 +  | NM_172961    | Abat          | 12360 | 8525882  | 8526082  |
| 16 | 8633824  | 8637795 -  | NM_025708    | Tmem186       | -2192 | 8639987  | 8640187  |
| 16 | 8637800  | 8657618 +  | NM_016881    | Pmm2          | 2187  | 8639987  | 8640187  |
| 16 | 8830193  | 8859018 +  | NM_001081400 | 1810013L24Rik | 6553  | 8836746  | 8836946  |
| 16 | 8830193  | 8859018 +  | NM_001081400 | 1810013L24Rik | 25146 | 8855339  | 8855539  |
| 16 | 9577803  | 9992627 -  | NM_008170    | Grin2a        | 52663 | 9939764  | 9939964  |
| 16 | 10358045 | 10395559 - | NM_001291001 | Tekt5         | -3690 | 10399249 | 10399449 |
| 16 | 10361347 | 10395542 - | NM_001099275 | Tekt5         | -3707 | 10399249 | 10399449 |
| 16 | 10420652 | 10447444 - | NM_001013778 | Tvp23a        | -6551 | 10453995 | 10454195 |
| 16 | 10480165 | 10527734 + | NM_001243760 | Ciita         | 14419 | 10494584 | 10494784 |
| 16 | 10480165 | 10527734 + | NM_001243760 | Ciita         | 16728 | 10496893 | 10497093 |
| 16 | 10480165 | 10527734 + | NM_001243760 | Ciita         | 16443 | 10496608 | 10496808 |
| 16 | 10480165 | 10527734 + | NM_001302618 | Ciita         | 14419 | 10494584 | 10494784 |
| 16 | 10480165 | 10527734 + | NM_001302618 | Ciita         | 16728 | 10496893 | 10497093 |
| 16 | 10480165 | 10527734 + | NM_001302618 | Ciita         | 16443 | 10496608 | 10496808 |
| 16 | 10480165 | 10527734 + | NM_001302619 | Ciita         | 14419 | 10494584 | 10494784 |
| 16 | 10480165 | 10527734 + | NM_001302619 | Ciita         | 16728 | 10496893 | 10497093 |
| 16 | 10480165 | 10527734 + | NM_001302619 | Ciita         | 16443 | 10496608 | 10496808 |
| 16 | 10488271 | 10527734 + | NM_007575    | Ciita         | 6313  | 10494584 | 10494784 |
| 16 | 10488271 | 10527734 + | NM_007575    | Ciita         | 8622  | 10496893 | 10497093 |



|    |          |            |              |         |        |          |          |
|----|----------|------------|--------------|---------|--------|----------|----------|
| 16 | 10488271 | 10527734 + | NM_007575    | Ciita   | 8337   | 10496608 | 10496808 |
| 16 | 10489874 | 10527734 + | NM_001243761 | Ciita   | 4710   | 10494584 | 10494784 |
| 16 | 10489874 | 10527734 + | NM_001243761 | Ciita   | 7019   | 10496893 | 10497093 |
| 16 | 10489874 | 10527734 + | NM_001243761 | Ciita   | 6734   | 10496608 | 10496808 |
| 16 | 10530300 | 10543148 - | NM_021428    | Dexi    | -8810  | 10551958 | 10552158 |
| 16 | 10545432 | 10744972 + | NM_001204229 | Clec16a | 156477 | 10701909 | 10702109 |
| 16 | 10545432 | 10744972 + | NM_001204229 | Clec16a | 187114 | 10732546 | 10732746 |
| 16 | 10545432 | 10744972 + | NM_001204229 | Clec16a | 36266  | 10581698 | 10581898 |
| 16 | 10545432 | 10744972 + | NM_001204229 | Clec16a | 114384 | 10659816 | 10660016 |
| 16 | 10545432 | 10744972 + | NM_001204229 | Clec16a | 131432 | 10676864 | 10677064 |
| 16 | 10545432 | 10744972 + | NM_001204229 | Clec16a | 93938  | 10639370 | 10639570 |
| 16 | 10545432 | 10744972 + | NM_001204229 | Clec16a | 6526   | 10551958 | 10552158 |
| 16 | 10545432 | 10744972 + | NM_177562    | Clec16a | 156477 | 10701909 | 10702109 |
| 16 | 10545432 | 10744972 + | NM_177562    | Clec16a | 187114 | 10732546 | 10732746 |
| 16 | 10545432 | 10744972 + | NM_177562    | Clec16a | 36266  | 10581698 | 10581898 |
| 16 | 10545432 | 10744972 + | NM_177562    | Clec16a | 114384 | 10659816 | 10660016 |
| 16 | 10545432 | 10744972 + | NM_177562    | Clec16a | 131432 | 10676864 | 10677064 |
| 16 | 10545432 | 10744972 + | NM_177562    | Clec16a | 93938  | 10639370 | 10639570 |
| 16 | 10545432 | 10744972 + | NM_177562    | Clec16a | 6526   | 10551958 | 10552158 |
| 16 | 10783902 | 10785630 - | NM_001271603 | Socs1   | -2394  | 10788024 | 10788224 |
| 16 | 10783902 | 10785630 - | NM_009896    | Socs1   | -2394  | 10788024 | 10788224 |
| 16 | 10788028 | 10788749 - | NM_013694    | Tnp2    | 525    | 10788024 | 10788224 |
| 16 | 10790601 | 10791008 - | NM_013638    | Prm3    | 2784   | 10788024 | 10788224 |
| 16 | 10835152 | 10843329 + | NM_001162932 | Rmi2    | -3904  | 10831048 | 10831248 |
| 16 | 10959366 | 10993215 - | NM_019980    | Litaf   | 1171   | 10991844 | 10992044 |
| 16 | 10959366 | 10993215 - | NM_019980    | Litaf   | -8960  | 11002175 | 11002375 |
| 16 | 10959366 | 10993215 - | NM_019980    | Litaf   | 17879  | 10975136 | 10975336 |
| 16 | 11008991 | 11015278 + | NR_040518    | Gm4262  | -6616  | 11002175 | 11002375 |
| 16 | 11322997 | 11755567 + | NM_028964    | Snx29   | 8034   | 11331031 | 11331231 |
| 16 | 11322997 | 11755567 + | NM_028964    | Snx29   | 188927 | 11511924 | 11512124 |

|    |          |            |              |               |        |          |          |
|----|----------|------------|--------------|---------------|--------|----------|----------|
| 16 | 11322997 | 11755567 + | NM_028964    | Snx29         | 274025 | 11597022 | 11597222 |
| 16 | 11322997 | 11755567 + | NM_028964    | Snx29         | 65309  | 11388306 | 11388506 |
| 16 | 11405741 | 11755567 + | NM_001290148 | Snx29         | 106183 | 11511924 | 11512124 |
| 16 | 11405741 | 11755567 + | NM_001290148 | Snx29         | 191281 | 11597022 | 11597222 |
| 16 | 13109829 | 13152103 + | NM_015769    | Ercc4         | 34500  | 13144329 | 13144529 |
| 16 | 13256574 | 13417623 + | NM_001122667 | Mkl2          | 100550 | 13357124 | 13357324 |
| 16 | 13256574 | 13417623 + | NM_001122667 | Mkl2          | 51956  | 13308530 | 13308730 |
| 16 | 13256574 | 13417623 + | NM_001122667 | Mkl2          | 56865  | 13313439 | 13313639 |
| 16 | 13256574 | 13417623 + | NM_001122667 | Mkl2          | 42311  | 13298885 | 13299085 |
| 16 | 13256574 | 13417623 + | NM_001122667 | Mkl2          | 984    | 13257558 | 13257758 |
| 16 | 13265172 | 13333016 + | NM_181860    | Mkl2          | 43358  | 13308530 | 13308730 |
| 16 | 13265172 | 13333016 + | NM_181860    | Mkl2          | 48267  | 13313439 | 13313639 |
| 16 | 13265172 | 13333016 + | NM_181860    | Mkl2          | 33713  | 13298885 | 13299085 |
| 16 | 13265172 | 13333016 + | NM_181860    | Mkl2          | -7414  | 13257558 | 13257758 |
| 16 | 13358514 | 13417623 + | NM_153588    | Mkl2          | -1190  | 13357124 | 13357324 |
| 16 | 13780792 | 13814935 + | NM_001039521 | Rrn3          | 20655  | 13801447 | 13801647 |
| 16 | 13780792 | 13814935 + | NM_001039521 | Rrn3          | 5480   | 13786272 | 13786472 |
| 16 | 13819370 | 13835544 + | NM_010946    | Ntan1         | 15239  | 13834609 | 13834809 |
| 16 | 13833666 | 13903239 - | NM_001039533 | Pdxdc1        | 17751  | 13885288 | 13885488 |
| 16 | 13833666 | 13903239 - | NM_001039533 | Pdxdc1        | 68430  | 13834609 | 13834809 |
| 16 | 13833666 | 13903239 - | NM_001291017 | Pdxdc1        | 17751  | 13885288 | 13885488 |
| 16 | 13833666 | 13903239 - | NM_001291017 | Pdxdc1        | 68430  | 13834609 | 13834809 |
| 16 | 13835793 | 13903239 - | NM_053181    | Pdxdc1        | 17751  | 13885288 | 13885488 |
| 16 | 13986730 | 14101588 + | NM_144518    | 2900011O08Rik | 73519  | 14060249 | 14060449 |
| 16 | 13986730 | 14101588 + | NM_144518    | 2900011O08Rik | 72872  | 14059602 | 14059802 |
| 16 | 15637959 | 15842333 + | NM_011159    | Prkdc         | 123113 | 15761072 | 15761272 |
| 16 | 15637959 | 15842333 + | NM_011159    | Prkdc         | 122526 | 15760485 | 15760685 |
| 16 | 15889318 | 16146945 - | NM_146068    | Spidr         | 42111  | 16104634 | 16104834 |
| 16 | 15889318 | 16146945 - | NM_146068    | Spidr         | -134   | 16147079 | 16147279 |
| 16 | 15889318 | 16146945 - | NM_146068    | Spidr         | 143588 | 16003157 | 16003357 |

|    |          |            |              |         |        |          |          |
|----|----------|------------|--------------|---------|--------|----------|----------|
| 16 | 16213438 | 16272806 + | NM_026163    | Pkp2    | 11367  | 16224805 | 16225005 |
| 16 | 16417008 | 16600072 - | NM_001301817 | Fgd4    | 98200  | 16501672 | 16501872 |
| 16 | 16417008 | 16600072 - | NM_001301817 | Fgd4    | 114123 | 16485749 | 16485949 |
| 16 | 16417008 | 16527505 - | NM_001301818 | Fgd4    | 25633  | 16501672 | 16501872 |
| 16 | 16417008 | 16527505 - | NM_001301818 | Fgd4    | 41556  | 16485749 | 16485949 |
| 16 | 16417008 | 16560313 - | NM_139232    | Fgd4    | 58441  | 16501672 | 16501872 |
| 16 | 16417008 | 16560313 - | NM_139232    | Fgd4    | 74364  | 16485749 | 16485949 |
| 16 | 16983475 | 17039134 + | NM_001038663 | Mapk1   | 27942  | 17011417 | 17011617 |
| 16 | 16983475 | 17047547 + | NM_011949    | Mapk1   | 27942  | 17011417 | 17011617 |
| 16 | 17152108 | 17201586 - | NM_009456    | Ube2l3  | -771   | 17202357 | 17202557 |
| 16 | 17208228 | 17214076 + | NM_001033338 | Rimbp3  | -5671  | 17202357 | 17202557 |
| 16 | 17233680 | 17263524 + | NM_178922    | Hic2    | 15640  | 17249320 | 17249520 |
| 16 | 17233680 | 17263524 + | NM_178922    | Hic2    | 4164   | 17237844 | 17238044 |
| 16 | 17544558 | 17561341 - | NM_001145435 | Lrrc74b | -6690  | 17568031 | 17568231 |
| 16 | 17544558 | 17561341 - | NM_029053    | Lrrc74b | -6690  | 17568031 | 17568231 |
| 16 | 17561978 | 17572106 + | NM_001159561 | P2rx6   | 6053   | 17568031 | 17568231 |
| 16 | 17561978 | 17572106 + | NM_011028    | P2rx6   | 6053   | 17568031 | 17568231 |
| 16 | 17646563 | 17650832 + | NM_001166164 | Ccdc74a | 1005   | 17647568 | 17647768 |
| 16 | 17651301 | 17723041 - | NM_001040683 | Med15   | 21976  | 17700865 | 17701065 |
| 16 | 17651301 | 17723041 - | NM_001040683 | Med15   | 66403  | 17656438 | 17656638 |
| 16 | 17651301 | 17723041 - | NM_001285884 | Med15   | 21976  | 17700865 | 17701065 |
| 16 | 17651301 | 17723041 - | NM_001285884 | Med15   | 66403  | 17656438 | 17656638 |
| 16 | 17651301 | 17722994 - | NM_001285886 | Med15   | 21929  | 17700865 | 17701065 |
| 16 | 17651301 | 17722994 - | NM_001285886 | Med15   | 66356  | 17656438 | 17656638 |
| 16 | 17651301 | 17723041 - | NM_033609    | Med15   | 21976  | 17700865 | 17701065 |
| 16 | 17651301 | 17723041 - | NM_033609    | Med15   | 66403  | 17656438 | 17656638 |
| 16 | 17759714 | 17793476 + | NM_145479    | Klhl22  | 4480   | 17764194 | 17764394 |
| 16 | 17840451 | 17891822 - | NM_001109750 | Dgcr2   | 20045  | 17871577 | 17871777 |
| 16 | 17840451 | 17891822 - | NM_010048    | Dgcr2   | 20045  | 17871577 | 17871777 |
| 16 | 18071819 | 18089284 - | NM_011172    | Prodh   | 13678  | 18075406 | 18075606 |

|    |          |            |              |         |       |          |          |
|----|----------|------------|--------------|---------|-------|----------|----------|
| 16 | 18071819 | 18089284 - | NM_011172    | Prodh   | 6631  | 18082453 | 18082653 |
| 16 | 18300918 | 18344026 - | NM_138583    | Tango2  | 4619  | 18339207 | 18339407 |
| 16 | 18300918 | 18344026 - | NM_138583    | Tango2  | 1630  | 18342196 | 18342396 |
| 16 | 18300918 | 18344026 - | NM_138583    | Tango2  | 24027 | 18319799 | 18319999 |
| 16 | 18348275 | 18407168 + | NM_001272029 | Arvcf   | -8868 | 18339207 | 18339407 |
| 16 | 18348275 | 18407168 + | NM_001272029 | Arvcf   | -5879 | 18342196 | 18342396 |
| 16 | 18348275 | 18407168 + | NM_033474    | Arvcf   | -8868 | 18339207 | 18339407 |
| 16 | 18348275 | 18407168 + | NM_033474    | Arvcf   | -5879 | 18342196 | 18342396 |
| 16 | 18426510 | 18479167 + | NM_013711    | Txnrd2  | 16934 | 18443444 | 18443644 |
| 16 | 18426510 | 18479167 + | NM_013711    | Txnrd2  | 22623 | 18449133 | 18449333 |
| 16 | 18498806 | 18566774 + | NM_001081682 | Gnb1l   | 10581 | 18509387 | 18509587 |
| 16 | 18498806 | 18566774 + | NM_001285491 | Gnb1l   | 10581 | 18509387 | 18509587 |
| 16 | 18498964 | 18566774 + | NM_001285493 | Gnb1l   | 10423 | 18509387 | 18509587 |
| 16 | 18498964 | 18566774 + | NM_001285494 | Gnb1l   | 10423 | 18509387 | 18509587 |
| 16 | 18498964 | 18566774 + | NM_023120    | Gnb1l   | 10423 | 18509387 | 18509587 |
| 16 | 18498964 | 18566774 + | NR_104347    | Gnb1l   | 10423 | 18509387 | 18509587 |
| 16 | 18621904 | 18630032 - | NM_213614    | Sept5   | -7649 | 18637681 | 18637881 |
| 16 | 18621904 | 18630032 - | NM_213614    | Sept5   | -9734 | 18639766 | 18639966 |
| 16 | 18876843 | 18970402 + | NM_010435    | Hira    | 16341 | 18893184 | 18893384 |
| 16 | 20141136 | 20232647 + | NM_001033237 | Yeats2  | 50181 | 20191317 | 20191517 |
| 16 | 20141136 | 20232647 + | NM_001033237 | Yeats2  | 58788 | 20199924 | 20200124 |
| 16 | 20141136 | 20232647 + | NM_001145930 | Yeats2  | 50181 | 20191317 | 20191517 |
| 16 | 20141136 | 20232647 + | NM_001145930 | Yeats2  | 58788 | 20199924 | 20200124 |
| 16 | 20545185 | 20548630 - | NR_030670    | Gm15760 | 180   | 20548250 | 20548450 |
| 16 | 20545185 | 20548630 - | NR_030670    | Gm15760 | -212  | 20548842 | 20549042 |
| 16 | 20548676 | 20561677 + | NM_013852    | Abcf3   | -226  | 20548250 | 20548450 |
| 16 | 20548676 | 20561677 + | NM_013852    | Abcf3   | 166   | 20548842 | 20549042 |
| 16 | 20703039 | 20716710 - | NM_009900    | Clcn2   | 3421  | 20713089 | 20713289 |
| 16 | 20717899 | 20722339 + | NM_145632    | Polr2h  | -4610 | 20713089 | 20713289 |
| 16 | 21331973 | 21333430 - | NR_131983    | Magef1  | 280   | 21332950 | 21333150 |

|    |          |            |              |               |        |          |          |
|----|----------|------------|--------------|---------------|--------|----------|----------|
| 16 | 21761358 | 21787908 - | NM_023737    | Ehhadh        | 2568   | 21785140 | 21785340 |
| 16 | 21794420 | 21806199 + | NR_037957    | 1300002E11Rik | -9080  | 21785140 | 21785340 |
| 16 | 21794420 | 21809113 + | NR_037958    | 1300002E11Rik | -9080  | 21785140 | 21785340 |
| 16 | 21892042 | 21931951 + | NM_172821    | Map3k13       | -9771  | 21882071 | 21882271 |
| 16 | 21934400 | 21947626 - | NM_025693    | Tmem41a       | 629    | 21946797 | 21946997 |
| 16 | 21934400 | 21947626 - | NR_037773    | Tmem41a       | 629    | 21946797 | 21946997 |
| 16 | 21953891 | 21995616 - | NM_001083894 | Liph          | -1508  | 21997124 | 21997324 |
| 16 | 21953891 | 21995616 - | NM_001289581 | Liph          | -1508  | 21997124 | 21997324 |
| 16 | 21953891 | 21995616 - | NM_001289582 | Liph          | -1508  | 21997124 | 21997324 |
| 16 | 21953891 | 21995616 - | NM_153404    | Liph          | -1508  | 21997124 | 21997324 |
| 16 | 22009557 | 22049343 + | NM_029457    | Senp2         | 17976  | 22027533 | 22027733 |
| 16 | 22009557 | 22049343 + | NR_027488    | Senp2         | 17976  | 22027533 | 22027733 |
| 16 | 22059082 | 22163373 - | NM_183029    | Igf2bp2       | 54925  | 22108248 | 22108448 |
| 16 | 22466642 | 22657305 - | NM_138650    | Dgkg          | 20864  | 22636241 | 22636441 |
| 16 | 22813288 | 22857643 - | NM_001081368 | Tbccd1        | 499    | 22856944 | 22857144 |
| 16 | 22857918 | 22872539 + | NM_001190804 | Dnajb11       | -774   | 22856944 | 22857144 |
| 16 | 22857918 | 22872539 + | NM_001190805 | Dnajb11       | -774   | 22856944 | 22857144 |
| 16 | 22857918 | 22879708 + | NM_026400    | Dnajb11       | -774   | 22856944 | 22857144 |
| 16 | 23224813 | 23360424 + | NM_145933    | St6gal1       | 61482  | 23286295 | 23286495 |
| 16 | 23226094 | 23360424 + | NM_001252505 | St6gal1       | 60201  | 23286295 | 23286495 |
| 16 | 23290543 | 23360424 + | NM_001252506 | St6gal1       | -4048  | 23286295 | 23286495 |
| 16 | 23965138 | 23988699 - | NM_009744    | Bcl6          | -5522  | 23994221 | 23994421 |
| 16 | 24393436 | 24992665 + | NM_178665    | Lpp           | 102016 | 24495452 | 24495652 |
| 16 | 24393436 | 24992665 + | NM_178665    | Lpp           | 106008 | 24499444 | 24499644 |
| 16 | 24448177 | 24992665 + | NM_001145952 | Lpp           | 47275  | 24495452 | 24495652 |
| 16 | 24448177 | 24992665 + | NM_001145952 | Lpp           | 51267  | 24499444 | 24499644 |
| 16 | 27353408 | 27370326 - | NM_198166    | Uts2b         | -5659  | 27375985 | 27376185 |
| 16 | 27389042 | 27452305 + | NM_001025615 | Ccdc50        | -798   | 27388044 | 27388244 |
| 16 | 27389042 | 27452305 + | NM_001289436 | Ccdc50        | -798   | 27388044 | 27388244 |
| 16 | 27389042 | 27452305 + | NM_026202    | Ccdc50        | -798   | 27388044 | 27388244 |

|    |          |            |              |               |        |          |          |
|----|----------|------------|--------------|---------------|--------|----------|----------|
| 16 | 28157869 | 28565038 - | NM_001276419 | Fgf12         | 174734 | 28390104 | 28390304 |
| 16 | 28157869 | 28753330 - | NM_010199    | Fgf12         | 363026 | 28390104 | 28390304 |
| 16 | 28157869 | 28446162 - | NM_183064    | Fgf12         | 55858  | 28390104 | 28390304 |
| 16 | 28826262 | 28929785 - | NM_177718    | Mb21d2        | 22956  | 28906629 | 28906829 |
| 16 | 28826262 | 28929785 - | NM_177718    | Mb21d2        | 49421  | 28880164 | 28880364 |
| 16 | 29958013 | 29979211 - | NR_037689    | Gm1968        | -8902  | 29988113 | 29988313 |
| 16 | 30008753 | 30021517 + | NR_033631    | 4632428C04Rik | -732   | 30007821 | 30008021 |
| 16 | 30065443 | 30067883 + | NM_008235    | Hes1          | 0      | 30065344 | 30065544 |
| 16 | 30065443 | 30067883 + | NM_008235    | Hes1          | -9133  | 30056110 | 30056310 |
| 16 | 30312510 | 30388617 - | NM_001128094 | Atp13a3       | -5461  | 30394078 | 30394278 |
| 16 | 30312510 | 30388617 - | NM_001128094 | Atp13a3       | -8994  | 30397611 | 30397811 |
| 16 | 30312510 | 30388617 - | NM_001128094 | Atp13a3       | 13810  | 30374607 | 30374807 |
| 16 | 30312510 | 30388617 - | NM_001128096 | Atp13a3       | -5461  | 30394078 | 30394278 |
| 16 | 30312510 | 30388617 - | NM_001128096 | Atp13a3       | -8994  | 30397611 | 30397811 |
| 16 | 30312510 | 30388617 - | NM_001128096 | Atp13a3       | 13810  | 30374607 | 30374807 |
| 16 | 30920640 | 31275784 - | NR_035427    | Mir1195       | 73691  | 31201893 | 31202093 |
| 16 | 30920640 | 31275784 - | NR_035427    | Mir1195       | 41     | 31275543 | 31275743 |
| 16 | 30920640 | 31275784 - | NR_035427    | Mir1195       | 31141  | 31244443 | 31244643 |
| 16 | 30920640 | 31275784 - | NR_035427    | Mir1195       | 194965 | 31080619 | 31080819 |
| 16 | 30920640 | 31275784 - | NR_035427    | Mir1195       | 107549 | 31168035 | 31168235 |
| 16 | 30920640 | 31275784 - | NR_035427    | Mir1195       | 204307 | 31071277 | 31071477 |
| 16 | 30955589 | 31081519 - | NM_198626    | Xxylt1        | 700    | 31080619 | 31080819 |
| 16 | 30955589 | 31081519 - | NM_198626    | Xxylt1        | 10042  | 31071277 | 31071477 |
| 16 | 31092499 | 31201325 - | NM_030138    | Acap2         | -568   | 31201893 | 31202093 |
| 16 | 31092499 | 31201325 - | NM_030138    | Acap2         | 33090  | 31168035 | 31168235 |
| 16 | 31251627 | 31275364 - | NM_025800    | Ppp1r2        | -179   | 31275543 | 31275743 |
| 16 | 31422383 | 31458988 + | NM_175177    | Bdh1          | 6867   | 31429250 | 31429450 |
| 16 | 31428839 | 31458988 + | NM_001122683 | Bdh1          | 411    | 31429250 | 31429450 |
| 16 | 31663529 | 31873443 + | NM_001252435 | Dlg1          | 54151  | 31717680 | 31717880 |
| 16 | 31664021 | 31873443 + | NM_001252433 | Dlg1          | 53659  | 31717680 | 31717880 |

|    |          |            |              |               |       |          |          |
|----|----------|------------|--------------|---------------|-------|----------|----------|
| 16 | 31664021 | 31873443 + | NM_001252434 | Dlg1          | 53659 | 31717680 | 31717880 |
| 16 | 31664021 | 31873443 + | NM_007862    | Dlg1          | 53659 | 31717680 | 31717880 |
| 16 | 31664021 | 31873443 + | NR_045516    | Dlg1          | 53659 | 31717680 | 31717880 |
| 16 | 32142911 | 32165563 - | NM_146069    | Nrros         | 1941  | 32163422 | 32163622 |
| 16 | 32332338 | 32393834 + | NM_177633    | Ubxn7         | 54130 | 32386468 | 32386668 |
| 16 | 32419788 | 32428979 + | NM_025329    | Tctex1d2      | 58    | 32419846 | 32420046 |
| 16 | 32431007 | 32475152 + | NM_009981    | Pcyt1a        | 15902 | 32446909 | 32447109 |
| 16 | 32431007 | 32475152 + | NM_009981    | Pcyt1a        | 32610 | 32463617 | 32463817 |
| 16 | 32431007 | 32475152 + | NM_009981    | Pcyt1a        | 18851 | 32449858 | 32450058 |
| 16 | 32431106 | 32475152 + | NM_001163159 | Pcyt1a        | 15803 | 32446909 | 32447109 |
| 16 | 32431106 | 32475152 + | NM_001163159 | Pcyt1a        | 32511 | 32463617 | 32463817 |
| 16 | 32431106 | 32475152 + | NM_001163159 | Pcyt1a        | 18752 | 32449858 | 32450058 |
| 16 | 32431316 | 32475152 + | NM_001163160 | Pcyt1a        | 15593 | 32446909 | 32447109 |
| 16 | 32431316 | 32475152 + | NM_001163160 | Pcyt1a        | 32301 | 32463617 | 32463817 |
| 16 | 32431316 | 32475152 + | NM_001163160 | Pcyt1a        | 18542 | 32449858 | 32450058 |
| 16 | 32475664 | 32487966 - | NM_145932    | Slc51a        | 445   | 32487321 | 32487521 |
| 16 | 32475664 | 32487966 - | NM_145932    | Slc51a        | 2364  | 32485402 | 32485602 |
| 16 | 32496367 | 32507301 + | NM_199309    | Zdhhc19       | -8846 | 32487321 | 32487521 |
| 16 | 32644729 | 32683580 + | NM_001110147 | Tnk2          | 791   | 32645520 | 32645720 |
| 16 | 32644729 | 32683580 + | NM_001110147 | Tnk2          | 25829 | 32670558 | 32670758 |
| 16 | 32644729 | 32683580 + | NM_001110147 | Tnk2          | 15138 | 32659867 | 32660067 |
| 16 | 32644729 | 32683580 + | NM_016788    | Tnk2          | 791   | 32645520 | 32645720 |
| 16 | 32644729 | 32683580 + | NM_016788    | Tnk2          | 25829 | 32670558 | 32670758 |
| 16 | 32644729 | 32683580 + | NM_016788    | Tnk2          | 15138 | 32659867 | 32660067 |
| 16 | 32665309 | 32668284 - | NR_033493    | Tnk2os        | -2274 | 32670558 | 32670758 |
| 16 | 32673240 | 32683580 + | NM_001289443 | Tnk2          | -2482 | 32670558 | 32670758 |
| 16 | 32821788 | 32868453 - | NM_001200038 | 1700021K19Rik | 587   | 32867666 | 32867866 |
| 16 | 32821788 | 32868453 - | NM_001200038 | 1700021K19Rik | -6592 | 32875045 | 32875245 |
| 16 | 32821788 | 32868453 - | NM_172615    | 1700021K19Rik | 587   | 32867666 | 32867866 |
| 16 | 32821788 | 32868453 - | NM_172615    | 1700021K19Rik | -6592 | 32875045 | 32875245 |

|    |          |            |              |         |        |          |          |
|----|----------|------------|--------------|---------|--------|----------|----------|
| 16 | 32877870 | 32909050 + | NM_001159349 | Fyttd1  | 29041  | 32906911 | 32907111 |
| 16 | 32877870 | 32909050 + | NM_001159349 | Fyttd1  | -2625  | 32875045 | 32875245 |
| 16 | 32877870 | 32909050 + | NM_027226    | Fyttd1  | 29041  | 32906911 | 32907111 |
| 16 | 32877870 | 32909050 + | NM_027226    | Fyttd1  | -2625  | 32875045 | 32875245 |
| 16 | 32914186 | 33016116 + | NM_001081255 | Lrch3   | -7075  | 32906911 | 32907111 |
| 16 | 32914186 | 33016116 + | NM_001310672 | Lrch3   | -7075  | 32906911 | 32907111 |
| 16 | 32914186 | 33016116 + | NM_001310673 | Lrch3   | -7075  | 32906911 | 32907111 |
| 16 | 32914186 | 33016116 + | NM_001310674 | Lrch3   | -7075  | 32906911 | 32907111 |
| 16 | 33062607 | 33125746 + | NM_172823    | Lmln    | 47648  | 33110255 | 33110455 |
| 16 | 33251542 | 33299649 + | NM_080557    | Snx4    | -308   | 33251034 | 33251234 |
| 16 | 33380861 | 33503990 + | NM_011749    | Zfp148  | 60986  | 33441847 | 33442047 |
| 16 | 33518415 | 33664222 + | NM_134251    | Slc12a8 | 77412  | 33595827 | 33596027 |
| 16 | 33518415 | 33664222 + | NM_134251    | Slc12a8 | 97893  | 33616308 | 33616508 |
| 16 | 33518415 | 33664222 + | NM_134251    | Slc12a8 | 76891  | 33595306 | 33595506 |
| 16 | 33518681 | 33664222 + | NM_001083902 | Slc12a8 | 77146  | 33595827 | 33596027 |
| 16 | 33518681 | 33664222 + | NM_001083902 | Slc12a8 | 97627  | 33616308 | 33616508 |
| 16 | 33518681 | 33664222 + | NM_001083902 | Slc12a8 | 76625  | 33595306 | 33595506 |
| 16 | 33684552 | 33768282 + | NM_175256    | Heg1    | 68586  | 33753138 | 33753338 |
| 16 | 33684552 | 33768282 + | NM_175256    | Heg1    | 81907  | 33766459 | 33766659 |
| 16 | 33684552 | 33768282 + | NM_175256    | Heg1    | 80091  | 33764643 | 33764843 |
| 16 | 33794123 | 33820014 + | NM_010739    | Muc13   | 1718   | 33795841 | 33796041 |
| 16 | 33794123 | 33820014 + | NM_010739    | Muc13   | -6898  | 33787025 | 33787225 |
| 16 | 33794123 | 33820014 + | NM_010739    | Muc13   | 50     | 33794173 | 33794373 |
| 16 | 33829751 | 33949425 + | NM_001145884 | Itgb5   | 112021 | 33941772 | 33941972 |
| 16 | 33829751 | 33949425 + | NM_001145884 | Itgb5   | 32020  | 33861771 | 33861971 |
| 16 | 33829751 | 33949425 + | NM_001145884 | Itgb5   | 56647  | 33886398 | 33886598 |
| 16 | 33829751 | 33949425 + | NM_001145884 | Itgb5   | 7011   | 33836762 | 33836962 |
| 16 | 33829751 | 33949425 + | NM_010580    | Itgb5   | 112021 | 33941772 | 33941972 |
| 16 | 33829751 | 33949425 + | NM_010580    | Itgb5   | 32020  | 33861771 | 33861971 |
| 16 | 33829751 | 33949425 + | NM_010580    | Itgb5   | 56647  | 33886398 | 33886598 |



|    |          |            |              |               |        |          |          |
|----|----------|------------|--------------|---------------|--------|----------|----------|
| 16 | 33829751 | 33949425 + | NM_010580    | Itgb5         | 7011   | 33836762 | 33836962 |
| 16 | 33969159 | 34514114 - | NM_177357    | Kalrn         | 442342 | 34071572 | 34071772 |
| 16 | 33969159 | 34514114 - | NM_177357    | Kalrn         | 243104 | 34270810 | 34271010 |
| 16 | 33969159 | 34514114 - | NM_177357    | Kalrn         | 414228 | 34099686 | 34099886 |
| 16 | 33969159 | 34514114 - | NM_177357    | Kalrn         | 393958 | 34119956 | 34120156 |
| 16 | 33969159 | 34514114 - | NM_177357    | Kalrn         | 419733 | 34094181 | 34094381 |
| 16 | 33969159 | 34514114 - | NM_177357    | Kalrn         | 469131 | 34044783 | 34044983 |
| 16 | 33969159 | 34514114 - | NM_177357    | Kalrn         | 466236 | 34047678 | 34047878 |
| 16 | 33969159 | 34514114 - | NM_177357    | Kalrn         | 465476 | 34048438 | 34048638 |
| 16 | 33969159 | 34514114 - | NM_177357    | Kalrn         | 467083 | 34046831 | 34047031 |
| 16 | 33969159 | 34514114 - | NM_177357    | Kalrn         | 478346 | 34035568 | 34035768 |
| 16 | 33969159 | 34514114 - | NM_177357    | Kalrn         | 477950 | 34035964 | 34036164 |
| 16 | 33969159 | 34514114 - | NM_177357    | Kalrn         | 483837 | 34030077 | 34030277 |
| 16 | 34152111 | 34514114 - | NM_001164268 | Kalrn         | 243104 | 34270810 | 34271010 |
| 16 | 34690702 | 34725281 + | NM_172824    | Ccdc14        | 28914  | 34719616 | 34719816 |
| 16 | 34785036 | 35002521 + | NM_139300    | Mylk          | 148272 | 34933308 | 34933508 |
| 16 | 34785036 | 35002521 + | NM_139300    | Mylk          | 151838 | 34936874 | 34937074 |
| 16 | 34785036 | 35002521 + | NM_139300    | Mylk          | 141666 | 34926702 | 34926902 |
| 16 | 34785036 | 35002521 + | NM_139300    | Mylk          | 146742 | 34931778 | 34931978 |
| 16 | 34935941 | 34939416 - | NR_040536    | 1700119H24Rik | 2342   | 34936874 | 34937074 |
| 16 | 35541448 | 35664345 + | NM_013661    | Sema5b        | -446   | 35540802 | 35541002 |
| 16 | 35694989 | 35769443 - | NM_153550    | Dirc2         | 34667  | 35734576 | 35734776 |
| 16 | 35694989 | 35769443 - | NM_153550    | Dirc2         | 6860   | 35762383 | 35762583 |
| 16 | 35770472 | 35828549 + | NM_175111    | Hspbap1       | -7889  | 35762383 | 35762583 |
| 16 | 35832964 | 35871469 - | NM_001039530 | Parp14        | 6863   | 35864406 | 35864606 |
| 16 | 35938556 | 35972708 + | NM_030253    | Parp9         | 18467  | 35957023 | 35957223 |
| 16 | 35983449 | 36036249 + | NM_008465    | Kpna1         | -1516  | 35981733 | 35981933 |
| 16 | 37509882 | 37539856 - | NM_028812    | Gtf2e1        | 5830   | 37533826 | 37534026 |
| 16 | 37539980 | 37572472 + | NM_001042499 | Rabl3         | -5954  | 37533826 | 37534026 |
| 16 | 37580239 | 37632113 + | NM_013547    | Hgd           | 10688  | 37590927 | 37591127 |

|    |          |            |              |         |        |          |          |
|----|----------|------------|--------------|---------|--------|----------|----------|
| 16 | 37580239 | 37632113 + | NM_013547    | Hgd     | 17421  | 37597660 | 37597860 |
| 16 | 37580239 | 37632113 + | NM_013547    | Hgd     | 5257   | 37585496 | 37585696 |
| 16 | 37580239 | 37632113 + | NR_027778    | Hgd     | 10688  | 37590927 | 37591127 |
| 16 | 37580239 | 37632113 + | NR_027778    | Hgd     | 17421  | 37597660 | 37597860 |
| 16 | 37580239 | 37632113 + | NR_027778    | Hgd     | 5257   | 37585496 | 37585696 |
| 16 | 37777141 | 37836603 + | NM_008047    | Fstl1   | 31112  | 37808253 | 37808453 |
| 16 | 37777141 | 37836603 + | NM_008047    | Fstl1   | 19202  | 37796343 | 37796543 |
| 16 | 37916582 | 38007616 + | NM_153394    | Gpr156  | 74806  | 37991388 | 37991588 |
| 16 | 37916582 | 38007616 + | NM_153394    | Gpr156  | 48315  | 37964897 | 37965097 |
| 16 | 37916582 | 38007616 + | NM_153394    | Gpr156  | 57452  | 37974034 | 37974234 |
| 16 | 38089087 | 38246166 + | NM_019827    | Gsk3b   | 11602  | 38100689 | 38100889 |
| 16 | 38248435 | 38294911 - | NM_001098404 | Nr1i2   | 11867  | 38282844 | 38283044 |
| 16 | 38248435 | 38294911 - | NM_001098404 | Nr1i2   | 6820   | 38287891 | 38288091 |
| 16 | 38248435 | 38294911 - | NM_001098404 | Nr1i2   | 7556   | 38287155 | 38287355 |
| 16 | 38248435 | 38294911 - | NM_001098404 | Nr1i2   | 43962  | 38250749 | 38250949 |
| 16 | 38248435 | 38294911 - | NM_010936    | Nr1i2   | 11867  | 38282844 | 38283044 |
| 16 | 38248435 | 38294911 - | NM_010936    | Nr1i2   | 6820   | 38287891 | 38288091 |
| 16 | 38248435 | 38294911 - | NM_010936    | Nr1i2   | 7556   | 38287155 | 38287355 |
| 16 | 38248435 | 38294911 - | NM_010936    | Nr1i2   | 43962  | 38250749 | 38250949 |
| 16 | 38297840 | 38341947 - | NM_001081025 | Maats1  | 35224  | 38306523 | 38306723 |
| 16 | 38525142 | 38550339 - | NM_001300827 | Poglut1 | 13164  | 38536975 | 38537175 |
| 16 | 38525142 | 38550339 - | NM_172380    | Poglut1 | 13164  | 38536975 | 38537175 |
| 16 | 38773297 | 38800317 - | NM_178924    | Upk1b   | 19674  | 38780443 | 38780643 |
| 16 | 38773297 | 38800317 - | NM_178924    | Upk1b   | 25026  | 38775091 | 38775291 |
| 16 | 42248674 | 42340765 - | NM_008083    | Gap43   | 63564  | 42277001 | 42277201 |
| 16 | 42907758 | 43619237 + | NM_001285805 | Zbtb20  | 667966 | 43575724 | 43575924 |
| 16 | 42907758 | 43619237 + | NM_001285805 | Zbtb20  | 553541 | 43461299 | 43461499 |
| 16 | 42907758 | 43619237 + | NM_001285805 | Zbtb20  | 473986 | 43381744 | 43381944 |
| 16 | 43247397 | 43619237 + | NM_019778    | Zbtb20  | 328327 | 43575724 | 43575924 |
| 16 | 43247397 | 43619237 + | NM_019778    | Zbtb20  | 213902 | 43461299 | 43461499 |

|    |          |            |              |               |        |          |          |
|----|----------|------------|--------------|---------------|--------|----------|----------|
| 16 | 43247397 | 43619237 + | NM_019778    | Zbtb20        | 134347 | 43381744 | 43381944 |
| 16 | 43247397 | 43619237 + | NM_181058    | Zbtb20        | 328327 | 43575724 | 43575924 |
| 16 | 43247397 | 43619237 + | NM_181058    | Zbtb20        | 213902 | 43461299 | 43461499 |
| 16 | 43247397 | 43619237 + | NM_181058    | Zbtb20        | 134347 | 43381744 | 43381944 |
| 16 | 43762355 | 43822953 + | NM_007877    | Drd3          | 45091  | 43807446 | 43807646 |
| 16 | 43969259 | 43979164 - | NM_001007460 | Zdhhc23       | 533    | 43978431 | 43978631 |
| 16 | 43980463 | 44028059 - | NM_001172107 | Gramd1c       | 9236   | 44018623 | 44018823 |
| 16 | 43980463 | 44028059 - | NM_001172107 | Gramd1c       | 123    | 44027736 | 44027936 |
| 16 | 43980463 | 44028059 - | NM_001172107 | Gramd1c       | 11610  | 44016249 | 44016449 |
| 16 | 43980463 | 44016550 - | NM_153528    | Gramd1c       | -2073  | 44018623 | 44018823 |
| 16 | 43980463 | 44016550 - | NM_153528    | Gramd1c       | 101    | 44016249 | 44016449 |
| 16 | 44013965 | 44014091 + | NR_037302    | Mir3470b      | 2284   | 44016249 | 44016449 |
| 16 | 44085517 | 44139133 - | NM_007508    | Atp6v1a       | -4338  | 44143471 | 44143671 |
| 16 | 44139922 | 44163478 + | NM_028108    | Naa50         | 3549   | 44143471 | 44143671 |
| 16 | 45139686 | 45158787 - | NM_028756    | Slc35a5       | 3945   | 45154642 | 45154842 |
| 16 | 45158942 | 45188652 + | NM_026402    | Atg3          | -4100  | 45154642 | 45154842 |
| 16 | 45626961 | 45654232 - | NM_145389    | BC016579      | 9749   | 45644283 | 45644483 |
| 16 | 45626961 | 45654232 - | NM_145389    | BC016579      | 0      | 45654091 | 45654291 |
| 16 | 45626961 | 45654232 - | NM_145389    | BC016579      | -4182  | 45658414 | 45658614 |
| 16 | 45626961 | 45654232 - | NM_145389    | BC016579      | 584    | 45653448 | 45653648 |
| 16 | 45626961 | 45654232 - | NM_145389    | BC016579      | 25991  | 45628041 | 45628241 |
| 16 | 45656430 | 45693772 - | NM_172455    | Tmprss7       | 23494  | 45670078 | 45670278 |
| 16 | 45656430 | 45693772 - | NM_172455    | Tmprss7       | 13879  | 45679693 | 45679893 |
| 16 | 45656430 | 45693772 - | NM_172455    | Tmprss7       | 35158  | 45658414 | 45658614 |
| 16 | 48399566 | 48412530 - | NR_015373    | Gm5485        | 9172   | 48403158 | 48403358 |
| 16 | 48399566 | 48412530 - | NR_015373    | Gm5485        | 1905   | 48410425 | 48410625 |
| 16 | 49855767 | 49911797 + | NM_010581    | Cd47          | 18831  | 49874598 | 49874798 |
| 16 | 50726864 | 50732887 - | NR_028300    | 5330426P16Rik | -3505  | 50736392 | 50736592 |
| 16 | 52031662 | 52208160 + | NM_001033238 | Cblb          | 25875  | 52057537 | 52057737 |
| 16 | 52031662 | 52208160 + | NM_001033238 | Cblb          | 123693 | 52155355 | 52155555 |

|    |          |            |              |         |        |          |          |
|----|----------|------------|--------------|---------|--------|----------|----------|
| 16 | 52031662 | 52208160 + | NM_001033238 | Cblb    | 50337  | 52081999 | 52082199 |
| 16 | 52031662 | 52208160 + | NM_001033238 | Cblb    | 101286 | 52132948 | 52133148 |
| 16 | 52031662 | 52208160 + | NM_001033238 | Cblb    | 49171  | 52080833 | 52081033 |
| 16 | 52031662 | 52208160 + | NM_001033238 | Cblb    | 47776  | 52079438 | 52079638 |
| 16 | 52249109 | 52453111 - | NM_009655    | Alcam   | 34091  | 52418820 | 52419020 |
| 16 | 52249109 | 52453111 - | NM_009655    | Alcam   | 13468  | 52439443 | 52439643 |
| 16 | 52249109 | 52453111 - | NM_009655    | Alcam   | 201714 | 52251197 | 52251397 |
| 16 | 55494844 | 55494911 + | NR_039578    | Mir5118 | -582   | 55494062 | 55494262 |
| 16 | 55811490 | 55822252 - | NM_001159394 | Nfkbiz  | 2591   | 55819461 | 55819661 |
| 16 | 55811490 | 55822252 - | NM_001159394 | Nfkbiz  | 5860   | 55816192 | 55816392 |
| 16 | 55811490 | 55838755 - | NM_001159395 | Nfkbiz  | 19094  | 55819461 | 55819661 |
| 16 | 55811490 | 55838755 - | NM_001159395 | Nfkbiz  | 22363  | 55816192 | 55816392 |
| 16 | 55811490 | 55838755 - | NM_030612    | Nfkbiz  | 19094  | 55819461 | 55819661 |
| 16 | 55811490 | 55838755 - | NM_030612    | Nfkbiz  | 22363  | 55816192 | 55816392 |
| 16 | 55840066 | 55895393 - | NM_001134457 | Nxpe3   | 2372   | 55892821 | 55893021 |
| 16 | 56477959 | 56690249 + | NM_001014399 | Abi3bp  | -9547  | 56468212 | 56468412 |
| 16 | 56477959 | 56690249 + | NM_001014399 | Abi3bp  | 72279  | 56550238 | 56550438 |
| 16 | 56477959 | 56690249 + | NM_001014399 | Abi3bp  | 13582  | 56491541 | 56491741 |
| 16 | 56477959 | 56690249 + | NM_001014422 | Abi3bp  | -9547  | 56468212 | 56468412 |
| 16 | 56477959 | 56690249 + | NM_001014422 | Abi3bp  | 72279  | 56550238 | 56550438 |
| 16 | 56477959 | 56690249 + | NM_001014422 | Abi3bp  | 13582  | 56491541 | 56491741 |
| 16 | 56477959 | 56690249 + | NM_001014423 | Abi3bp  | -9547  | 56468212 | 56468412 |
| 16 | 56477959 | 56690249 + | NM_001014423 | Abi3bp  | 72279  | 56550238 | 56550438 |
| 16 | 56477959 | 56690249 + | NM_001014423 | Abi3bp  | 13582  | 56491541 | 56491741 |
| 16 | 56477959 | 56690249 + | NM_001014424 | Abi3bp  | -9547  | 56468212 | 56468412 |
| 16 | 56477959 | 56690249 + | NM_001014424 | Abi3bp  | 72279  | 56550238 | 56550438 |
| 16 | 56477959 | 56690249 + | NM_001014424 | Abi3bp  | 13582  | 56491541 | 56491741 |
| 16 | 56477959 | 56690249 + | NM_178790    | Abi3bp  | -9547  | 56468212 | 56468412 |
| 16 | 56477959 | 56690249 + | NM_178790    | Abi3bp  | 72279  | 56550238 | 56550438 |
| 16 | 56477959 | 56690249 + | NM_178790    | Abi3bp  | 13582  | 56491541 | 56491741 |

|    |          |            |              |          |        |          |          |
|----|----------|------------|--------------|----------|--------|----------|----------|
| 16 | 56690442 | 56717564 - | NM_001252443 | Tfg      | -5023  | 56722587 | 56722787 |
| 16 | 56690442 | 56717564 - | NM_001252443 | Tfg      | -1711  | 56719275 | 56719475 |
| 16 | 56690442 | 56717564 - | NM_019678    | Tfg      | -5023  | 56722587 | 56722787 |
| 16 | 56690442 | 56717564 - | NM_019678    | Tfg      | -1711  | 56719275 | 56719475 |
| 16 | 56724722 | 56795972 - | NM_172825    | Adgrg7   | -2981  | 56798953 | 56799153 |
| 16 | 56724722 | 56795972 - | NM_172825    | Adgrg7   | 0      | 56795872 | 56796072 |
| 16 | 56724722 | 56795972 - | NM_172825    | Adgrg7   | -1070  | 56797042 | 56797242 |
| 16 | 56724722 | 56795972 - | NM_172825    | Adgrg7   | 11147  | 56784625 | 56784825 |
| 16 | 57037080 | 57071460 - | NM_183281    | Tmem45a2 | 13999  | 57057261 | 57057461 |
| 16 | 57121827 | 57154644 + | NM_138599    | Tomm70a  | 29805  | 57151632 | 57151832 |
| 16 | 57121827 | 57154644 + | NM_138599    | Tomm70a  | 1110   | 57122937 | 57123137 |
| 16 | 57302113 | 57606981 - | NM_025599    | Cmss1    | 153558 | 57453223 | 57453423 |
| 16 | 57302113 | 57606981 - | NM_025599    | Cmss1    | 39831  | 57566950 | 57567150 |
| 16 | 57302113 | 57606981 - | NM_025599    | Cmss1    | 215247 | 57391534 | 57391734 |
| 16 | 57353390 | 57572918 + | NM_001040397 | Filip1l  | 99833  | 57453223 | 57453423 |
| 16 | 57353390 | 57572918 + | NM_001040397 | Filip1l  | 213560 | 57566950 | 57567150 |
| 16 | 57353390 | 57572918 + | NM_001040397 | Filip1l  | 38144  | 57391534 | 57391734 |
| 16 | 57549355 | 57572918 + | NM_001177871 | Filip1l  | 17595  | 57566950 | 57567150 |
| 16 | 58670321 | 58680503 + | NM_007757    | Cpox     | 0      | 58670165 | 58670365 |
| 16 | 58717548 | 58718838 - | NM_001162955 | Gpr15    | -3617  | 58722455 | 58722655 |
| 16 | 58728023 | 58734361 + | NM_001252450 | Cldnd1   | -5368  | 58722455 | 58722655 |
| 16 | 58728023 | 58734361 + | NM_001252451 | Cldnd1   | -5368  | 58722455 | 58722655 |
| 16 | 58728023 | 58734361 + | NM_171826    | Cldnd1   | -5368  | 58722455 | 58722655 |
| 16 | 58728023 | 58734361 + | NR_045517    | Cldnd1   | -5368  | 58722455 | 58722655 |
| 16 | 58728023 | 58734361 + | NR_045518    | Cldnd1   | -5368  | 58722455 | 58722655 |
| 16 | 59613147 | 59639166 - | NM_019665    | Arl6     | 21880  | 59617086 | 59617286 |
| 16 | 62734678 | 62786543 - | NM_178925    | Nsun3    | 32815  | 62753528 | 62753728 |
| 16 | 62854160 | 62929167 + | NM_011173    | Pros1    | 60704  | 62914864 | 62915064 |
| 16 | 70314194 | 70569966 + | NM_028803    | Gbe1     | 652    | 70314846 | 70315046 |
| 16 | 76291107 | 76373295 - | NM_173440    | Nrip1    | 5752   | 76367343 | 76367543 |

|    |          |            |              |               |       |          |          |
|----|----------|------------|--------------|---------------|-------|----------|----------|
| 16 | 76291107 | 76373295 - | NM_173440    | Nrip1         | 78956 | 76294139 | 76294339 |
| 16 | 76291107 | 76373295 - | NM_173440    | Nrip1         | 26870 | 76346225 | 76346425 |
| 16 | 76291107 | 76373295 - | NM_173440    | Nrip1         | 14490 | 76358605 | 76358805 |
| 16 | 76291107 | 76373295 - | NM_173440    | Nrip1         | 35803 | 76337292 | 76337492 |
| 16 | 77329573 | 77558674 + | NR_015543    | Mir99ahg      | 1792  | 77331365 | 77331565 |
| 16 | 78251108 | 78255700 - | NR_045698    | E330011O21Rik | -9763 | 78265463 | 78265663 |
| 16 | 78301916 | 78341005 + | NM_001025192 | Cxadr         | 10626 | 78312542 | 78312742 |
| 16 | 78301916 | 78341005 + | NM_001025192 | Cxadr         | 18181 | 78320097 | 78320297 |
| 16 | 78301916 | 78341005 + | NM_001025192 | Cxadr         | 16394 | 78318310 | 78318510 |
| 16 | 78301916 | 78341005 + | NM_001025192 | Cxadr         | 6559  | 78308475 | 78308675 |
| 16 | 78301916 | 78341005 + | NM_001025192 | Cxadr         | 7799  | 78309715 | 78309915 |
| 16 | 78301916 | 78330214 + | NM_001276263 | Cxadr         | 10626 | 78312542 | 78312742 |
| 16 | 78301916 | 78330214 + | NM_001276263 | Cxadr         | 18181 | 78320097 | 78320297 |
| 16 | 78301916 | 78330214 + | NM_001276263 | Cxadr         | 16394 | 78318310 | 78318510 |
| 16 | 78301916 | 78330214 + | NM_001276263 | Cxadr         | 6559  | 78308475 | 78308675 |
| 16 | 78301916 | 78330214 + | NM_001276263 | Cxadr         | 7799  | 78309715 | 78309915 |
| 16 | 78301916 | 78360031 + | NM_009988    | Cxadr         | 10626 | 78312542 | 78312742 |
| 16 | 78301916 | 78360031 + | NM_009988    | Cxadr         | 18181 | 78320097 | 78320297 |
| 16 | 78301916 | 78360031 + | NM_009988    | Cxadr         | 16394 | 78318310 | 78318510 |
| 16 | 78301916 | 78360031 + | NM_009988    | Cxadr         | 6559  | 78308475 | 78308675 |
| 16 | 78301916 | 78360031 + | NM_009988    | Cxadr         | 7799  | 78309715 | 78309915 |
| 16 | 84774368 | 84826621 + | NM_023844    | Jam2          | 32102 | 84806470 | 84806670 |
| 16 | 84774368 | 84826621 + | NM_023844    | Jam2          | 27946 | 84802314 | 84802514 |
| 16 | 84828116 | 84835871 - | NM_001302213 | Atp5j         | 2181  | 84833490 | 84833690 |
| 16 | 84828116 | 84835268 - | NM_001302214 | Atp5j         | 1578  | 84833490 | 84833690 |
| 16 | 84828116 | 84835247 - | NM_001302215 | Atp5j         | 1557  | 84833490 | 84833690 |
| 16 | 84828116 | 84835244 - | NM_001302216 | Atp5j         | 1554  | 84833490 | 84833690 |
| 16 | 84828116 | 84835871 - | NM_016755    | Atp5j         | 2181  | 84833490 | 84833690 |
| 16 | 84835369 | 84864024 + | NM_008065    | Gabpa         | -1679 | 84833490 | 84833690 |
| 16 | 84954681 | 85173953 - | NM_001198823 | App           | 40759 | 85132994 | 85133194 |

|    |          |            |              |     |        |          |          |
|----|----------|------------|--------------|-----|--------|----------|----------|
| 16 | 84954681 | 85173953 - | NM_001198823 | App | 3659   | 85170094 | 85170294 |
| 16 | 84954681 | 85173953 - | NM_001198823 | App | 28942  | 85144811 | 85145011 |
| 16 | 84954681 | 85173953 - | NM_001198823 | App | 16198  | 85157555 | 85157755 |
| 16 | 84954681 | 85173953 - | NM_001198823 | App | 30170  | 85143583 | 85143783 |
| 16 | 84954681 | 85173953 - | NM_001198823 | App | 208110 | 84965643 | 84965843 |
| 16 | 84954681 | 85173953 - | NM_001198823 | App | 78139  | 85095614 | 85095814 |
| 16 | 84954681 | 85173953 - | NM_001198824 | App | 40759  | 85132994 | 85133194 |
| 16 | 84954681 | 85173953 - | NM_001198824 | App | 3659   | 85170094 | 85170294 |
| 16 | 84954681 | 85173953 - | NM_001198824 | App | 28942  | 85144811 | 85145011 |
| 16 | 84954681 | 85173953 - | NM_001198824 | App | 16198  | 85157555 | 85157755 |
| 16 | 84954681 | 85173953 - | NM_001198824 | App | 30170  | 85143583 | 85143783 |
| 16 | 84954681 | 85173953 - | NM_001198824 | App | 208110 | 84965643 | 84965843 |
| 16 | 84954681 | 85173953 - | NM_001198824 | App | 78139  | 85095614 | 85095814 |
| 16 | 84954681 | 85173953 - | NM_001198825 | App | 40759  | 85132994 | 85133194 |
| 16 | 84954681 | 85173953 - | NM_001198825 | App | 3659   | 85170094 | 85170294 |
| 16 | 84954681 | 85173953 - | NM_001198825 | App | 28942  | 85144811 | 85145011 |
| 16 | 84954681 | 85173953 - | NM_001198825 | App | 16198  | 85157555 | 85157755 |
| 16 | 84954681 | 85173953 - | NM_001198825 | App | 30170  | 85143583 | 85143783 |
| 16 | 84954681 | 85173953 - | NM_001198825 | App | 208110 | 84965643 | 84965843 |
| 16 | 84954681 | 85173953 - | NM_001198825 | App | 78139  | 85095614 | 85095814 |
| 16 | 84954681 | 85173953 - | NM_001198826 | App | 40759  | 85132994 | 85133194 |
| 16 | 84954681 | 85173953 - | NM_001198826 | App | 3659   | 85170094 | 85170294 |
| 16 | 84954681 | 85173953 - | NM_001198826 | App | 28942  | 85144811 | 85145011 |
| 16 | 84954681 | 85173953 - | NM_001198826 | App | 16198  | 85157555 | 85157755 |
| 16 | 84954681 | 85173953 - | NM_001198826 | App | 30170  | 85143583 | 85143783 |
| 16 | 84954681 | 85173953 - | NM_001198826 | App | 208110 | 84965643 | 84965843 |
| 16 | 84954681 | 85173953 - | NM_001198826 | App | 78139  | 85095614 | 85095814 |
| 16 | 84954681 | 85173953 - | NM_007471    | App | 40759  | 85132994 | 85133194 |
| 16 | 84954681 | 85173953 - | NM_007471    | App | 3659   | 85170094 | 85170294 |
| 16 | 84954681 | 85173953 - | NM_007471    | App | 28942  | 85144811 | 85145011 |

|    |          |            |              |               |        |          |          |
|----|----------|------------|--------------|---------------|--------|----------|----------|
| 16 | 84954681 | 85173953 - | NM_007471    | App           | 16198  | 85157555 | 85157755 |
| 16 | 84954681 | 85173953 - | NM_007471    | App           | 30170  | 85143583 | 85143783 |
| 16 | 84954681 | 85173953 - | NM_007471    | App           | 208110 | 84965643 | 84965843 |
| 16 | 84954681 | 85173953 - | NM_007471    | App           | 78139  | 85095614 | 85095814 |
| 16 | 84972456 | 84979697 + | NR_045889    | Gm10791       | -6613  | 84965643 | 84965843 |
| 16 | 87376896 | 87432852 - | NM_001081068 | Ltn1          | -2678  | 87435530 | 87435730 |
| 16 | 87433576 | 87440838 - | NM_016924    | Rwdd2b        | 5108   | 87435530 | 87435730 |
| 16 | 87433576 | 87440838 - | NM_016924    | Rwdd2b        | -2740  | 87443578 | 87443778 |
| 16 | 87896142 | 88290504 - | NM_010348    | Grik1         | 309832 | 87980472 | 87980672 |
| 16 | 87896142 | 88290504 - | NM_146072    | Grik1         | 309832 | 87980472 | 87980672 |
| 16 | 90220987 | 90226570 + | NM_011434    | Sod1          | -8722  | 90212065 | 90212265 |
| 16 | 90386642 | 90499799 + | NM_015755    | Hunk          | 25797  | 90412439 | 90412639 |
| 16 | 90831104 | 90905131 + | NM_001199210 | Eva1c         | -1297  | 90829607 | 90829807 |
| 16 | 90831104 | 90905131 + | NM_027627    | Eva1c         | -1297  | 90829607 | 90829807 |
| 16 | 90936342 | 91011554 - | NM_001164483 | Synj1         | 981    | 91010373 | 91010573 |
| 16 | 90936346 | 91011341 - | NM_001045515 | Synj1         | 768    | 91010373 | 91010573 |
| 16 | 91011494 | 91016749 + | NR_028368    | 4930404I05Rik | -921   | 91010373 | 91010573 |
| 16 | 91014282 | 91044625 - | NM_026110    | Paxbp1        | -348   | 91044973 | 91045173 |
| 16 | 91014282 | 91044625 - | NM_026110    | Paxbp1        | -7530  | 91052155 | 91052355 |
| 16 | 91014282 | 91044625 - | NM_026110    | Paxbp1        | -2767  | 91047392 | 91047592 |
| 16 | 91054180 | 91069391 - | NM_001163695 | 4932438H23Rik | 12638  | 91056553 | 91056753 |
| 16 | 91054180 | 91069391 - | NM_001163695 | 4932438H23Rik | 7295   | 91061896 | 91062096 |
| 16 | 91054180 | 91069391 - | NM_001163695 | 4932438H23Rik | 13053  | 91056138 | 91056338 |
| 16 | 91054180 | 91069391 - | NM_028905    | 4932438H23Rik | 12638  | 91056553 | 91056753 |
| 16 | 91054180 | 91069391 - | NM_028905    | 4932438H23Rik | 7295   | 91061896 | 91062096 |
| 16 | 91054180 | 91069391 - | NM_028905    | 4932438H23Rik | 13053  | 91056138 | 91056338 |
| 16 | 91373028 | 91394289 + | NM_001110498 | lfnar2        | 7479   | 91380507 | 91380707 |
| 16 | 91373028 | 91405833 + | NM_010509    | lfnar2        | 7479   | 91380507 | 91380707 |
| 16 | 91406480 | 91426080 + | NM_008349    | Il10rb        | 7075   | 91413555 | 91413755 |
| 16 | 91527688 | 91527790 - | NR_105786    | Mir6367       | -4720  | 91532510 | 91532710 |



|    |          |            |              |               |       |          |          |
|----|----------|------------|--------------|---------------|-------|----------|----------|
| 16 | 91547339 | 91564253 + | NM_008338    | Ifngr2        | 5157  | 91552496 | 91552696 |
| 16 | 91547339 | 91564253 + | NM_008338    | Ifngr2        | 4224  | 91551563 | 91551763 |
| 16 | 91648069 | 91679438 + | NM_178880    | Son           | 30785 | 91678854 | 91679054 |
| 16 | 91689143 | 91716001 + | NR_040389    | Gm10785       | 13969 | 91703112 | 91703312 |
| 16 | 91689143 | 91716001 + | NR_040389    | Gm10785       | 21408 | 91710551 | 91710751 |
| 16 | 91689567 | 91729048 - | NM_026994    | Cryzl1        | -309  | 91729357 | 91729557 |
| 16 | 91689567 | 91729048 - | NM_026994    | Cryzl1        | 25736 | 91703112 | 91703312 |
| 16 | 91689567 | 91729048 - | NM_026994    | Cryzl1        | 18297 | 91710551 | 91710751 |
| 16 | 91689567 | 91729048 - | NM_133679    | Cryzl1        | -309  | 91729357 | 91729557 |
| 16 | 91689567 | 91729048 - | NM_133679    | Cryzl1        | 25736 | 91703112 | 91703312 |
| 16 | 91689567 | 91729048 - | NM_133679    | Cryzl1        | 18297 | 91710551 | 91710751 |
| 16 | 91729616 | 91871901 + | NM_001110275 | ltsn1         | -59   | 91729357 | 91729557 |
| 16 | 91729616 | 91832598 + | NM_001110276 | ltsn1         | -59   | 91729357 | 91729557 |
| 16 | 91729616 | 91920825 + | NM_010587    | ltsn1         | -59   | 91729357 | 91729557 |
| 16 | 92301548 | 92313287 + | NM_138743    | Smim11        | -1    | 92301347 | 92301547 |
| 16 | 92392196 | 92466415 - | NM_001081549 | Rcan1         | 62993 | 92403222 | 92403422 |
| 16 | 92392196 | 92466415 - | NM_001081549 | Rcan1         | 22366 | 92443849 | 92444049 |
| 16 | 92392196 | 92466415 - | NM_001081549 | Rcan1         | 1486  | 92464729 | 92464929 |
| 16 | 92392196 | 92466415 - | NM_001081549 | Rcan1         | 58079 | 92408136 | 92408336 |
| 16 | 92392196 | 92400324 - | NM_019466    | Rcan1         | -2898 | 92403222 | 92403422 |
| 16 | 92392196 | 92400324 - | NM_019466    | Rcan1         | -7812 | 92408136 | 92408336 |
| 16 | 92478987 | 92497611 + | NM_029740    | 2410124H12Rik | 8797  | 92487784 | 92487984 |
| 16 | 93343961 | 93354317 - | NR_040488    | 1810053B23Rik | -9658 | 93363975 | 93364175 |
| 16 | 93343961 | 93358958 - | NR_040489    | 1810053B23Rik | -5017 | 93363975 | 93364175 |
| 16 | 93344989 | 93354317 - | NR_040490    | 1810053B23Rik | -9658 | 93363975 | 93364175 |
| 16 | 93346302 | 93359789 - | NR_040487    | 1810053B23Rik | -4186 | 93363975 | 93364175 |
| 16 | 93347042 | 93359757 - | NR_040491    | 1810053B23Rik | -4218 | 93363975 | 93364175 |
| 16 | 93369965 | 93370062 + | NR_030429    | Mir802        | -5790 | 93363975 | 93364175 |
| 16 | 93397060 | 93459118 - | NR_040494    | 1700029J03Rik | 2636  | 93456282 | 93456482 |
| 16 | 93397060 | 93459118 - | NR_040494    | 1700029J03Rik | 33990 | 93424928 | 93425128 |

|    |          |            |              |        |        |          |          |
|----|----------|------------|--------------|--------|--------|----------|----------|
| 16 | 93583706 | 93604061 - | NM_145482    | Setd4  | -8290  | 93612351 | 93612551 |
| 16 | 93583706 | 93604061 - | NM_145482    | Setd4  | -5191  | 93609252 | 93609452 |
| 16 | 93608082 | 93610595 + | NM_007620    | Cbr1   | 1170   | 93609252 | 93609452 |
| 16 | 93712152 | 93740524 + | NM_026700    | Dopey2 | 13644  | 93725796 | 93725996 |
| 16 | 93712152 | 93740524 + | NM_026700    | Dopey2 | 19490  | 93731642 | 93731842 |
| 16 | 93712152 | 93810834 + | NM_027293    | Dopey2 | 13644  | 93725796 | 93725996 |
| 16 | 93712152 | 93810834 + | NM_027293    | Dopey2 | 34367  | 93746519 | 93746719 |
| 16 | 93712152 | 93810834 + | NM_027293    | Dopey2 | 19490  | 93731642 | 93731842 |
| 16 | 93832366 | 93876319 + | NM_001045529 | Morc3  | 7303   | 93839669 | 93839869 |
| 16 | 93919276 | 93929813 - | NM_001165925 | Cldn14 | 1715   | 93927898 | 93928098 |
| 16 | 93919276 | 93930063 - | NM_001165926 | Cldn14 | 1965   | 93927898 | 93928098 |
| 16 | 93919276 | 94009083 - | NM_019500    | Cldn14 | 2329   | 94006554 | 94006754 |
| 16 | 93919276 | 94009083 - | NM_019500    | Cldn14 | 80985  | 93927898 | 93928098 |
| 16 | 94350912 | 94509464 - | NM_139145    | Hlcs   | 50905  | 94458359 | 94458559 |
| 16 | 94350912 | 94509464 - | NM_139145    | Hlcs   | 137006 | 94372258 | 94372458 |
| 16 | 94791813 | 94917127 + | NM_007890    | Dyrk1a | 35337  | 94827150 | 94827350 |
| 16 | 94791813 | 94917127 + | NM_007890    | Dyrk1a | 62441  | 94854254 | 94854454 |
| 16 | 94791813 | 94917127 + | NM_007890    | Dyrk1a | 29926  | 94821739 | 94821939 |
| 16 | 94791813 | 94917127 + | NM_007890    | Dyrk1a | 34917  | 94826730 | 94826930 |
| 16 | 94792514 | 94917127 + | NM_001113389 | Dyrk1a | 34636  | 94827150 | 94827350 |
| 16 | 94792514 | 94917127 + | NM_001113389 | Dyrk1a | 61740  | 94854254 | 94854454 |
| 16 | 94792514 | 94917127 + | NM_001113389 | Dyrk1a | 29225  | 94821739 | 94821939 |
| 16 | 94792514 | 94917127 + | NM_001113389 | Dyrk1a | 34216  | 94826730 | 94826930 |
| 16 | 95580776 | 95808201 - | NM_001302152 | Erg    | 224786 | 95583215 | 95583415 |
| 16 | 95580776 | 95680956 - | NM_001302153 | Erg    | 97541  | 95583215 | 95583415 |
| 16 | 95580776 | 95680956 - | NM_001302154 | Erg    | 97541  | 95583215 | 95583415 |
| 16 | 95580776 | 95751973 - | NM_001302179 | Erg    | 168558 | 95583215 | 95583415 |
| 16 | 95580776 | 95751973 - | NM_001302183 | Erg    | 168558 | 95583215 | 95583415 |
| 16 | 95580776 | 95751973 - | NM_133659    | Erg    | 168558 | 95583215 | 95583415 |
| 16 | 95924014 | 95942657 + | NM_011809    | Ets2   | -9548  | 95914266 | 95914466 |

|    |          |            |              |               |        |          |          |
|----|----------|------------|--------------|---------------|--------|----------|----------|
| 16 | 96052730 | 96120321 - | NR_040485    | 1600002D24Rik | 40925  | 96079196 | 96079396 |
| 16 | 96052730 | 96120321 - | NR_040485    | 1600002D24Rik | -6386  | 96126707 | 96126907 |
| 16 | 96052730 | 96120321 - | NR_040485    | 1600002D24Rik | 41938  | 96078183 | 96078383 |
| 16 | 96063493 | 96150685 - | NR_040484    | 1600002D24Rik | 71289  | 96079196 | 96079396 |
| 16 | 96063493 | 96150685 - | NR_040484    | 1600002D24Rik | 23778  | 96126707 | 96126907 |
| 16 | 96063493 | 96150685 - | NR_040484    | 1600002D24Rik | 72302  | 96078183 | 96078383 |
| 16 | 96213699 | 96304036 - | NM_145125    | Brwd1         | -1091  | 96305127 | 96305327 |
| 16 | 96223155 | 96304036 - | NM_001103179 | Brwd1         | -1091  | 96305127 | 96305327 |
| 16 | 96288275 | 96304036 - | NM_176928    | Brwd1         | -1091  | 96305127 | 96305327 |
| 16 | 96457408 | 96541466 + | NM_001122993 | B3galt5       | 29343  | 96486751 | 96486951 |
| 16 | 96583364 | 96625638 + | NM_001177887 | Igsf5         | 10996  | 96594360 | 96594560 |
| 16 | 96583364 | 96625638 + | NM_001177887 | Igsf5         | 11932  | 96595296 | 96595496 |
| 16 | 96583364 | 96625638 + | NM_001177887 | Igsf5         | 10420  | 96593784 | 96593984 |
| 16 | 96583368 | 96643729 + | NM_001177886 | Igsf5         | 10992  | 96594360 | 96594560 |
| 16 | 96583368 | 96643729 + | NM_001177886 | Igsf5         | 11928  | 96595296 | 96595496 |
| 16 | 96583368 | 96643729 + | NM_001177886 | Igsf5         | 10416  | 96593784 | 96593984 |
| 16 | 96583371 | 96625638 + | NM_028078    | Igsf5         | 10989  | 96594360 | 96594560 |
| 16 | 96583371 | 96625638 + | NM_028078    | Igsf5         | 11925  | 96595296 | 96595496 |
| 16 | 96583371 | 96625638 + | NM_028078    | Igsf5         | 10413  | 96593784 | 96593984 |
| 16 | 96813687 | 97392343 - | NM_031174    | Dscam         | 527757 | 96864386 | 96864586 |
| 16 | 96813687 | 97392343 - | NM_031174    | Dscam         | 500701 | 96891442 | 96891642 |
| 16 | 96813687 | 97392343 - | NM_031174    | Dscam         | 545131 | 96847012 | 96847212 |
| 16 | 97692693 | 97726544 - | NM_020622    | Fam3b         | 29018  | 97697326 | 97697526 |
| 16 | 97692693 | 97726544 - | NM_020622    | Fam3b         | 5083   | 97721261 | 97721461 |
| 16 | 97786289 | 97832803 - | NM_015775    | Tmprss2       | 1139   | 97831464 | 97831664 |
| 16 | 97963549 | 97985363 - | NM_023663    | Ripk4         | 4886   | 97980277 | 97980477 |
| 16 | 97963549 | 97985363 - | NM_023663    | Ripk4         | 8037   | 97977126 | 97977326 |
| 16 | 98013074 | 98072835 - | NM_144789    | Prdm15        | 52723  | 98019912 | 98020112 |
| 16 | 98013074 | 98072835 - | NM_144789    | Prdm15        | 5646   | 98066989 | 98067189 |
| 16 | 98013074 | 98072835 - | NM_144789    | Prdm15        | 53060  | 98019575 | 98019775 |

|    |         |           |              |               |        |         |         |
|----|---------|-----------|--------------|---------------|--------|---------|---------|
| 17 | 3064318 | 3084184 - | NR_003519    | Pisd-ps2      | 1299   | 3082685 | 3082885 |
| 17 | 3064318 | 3084184 - | NR_003519    | Pisd-ps2      | -153   | 3084337 | 3084537 |
| 17 | 3064318 | 3084184 - | NR_003519    | Pisd-ps2      | 6243   | 3077741 | 3077941 |
| 17 | 3064318 | 3084184 - | NR_003519    | Pisd-ps2      | 4663   | 3079321 | 3079521 |
| 17 | 3064318 | 3084184 - | NR_003519    | Pisd-ps2      | 6934   | 3077050 | 3077250 |
| 17 | 3114972 | 3198860 + | NM_134123    | Scaf8         | 7988   | 3122960 | 3123160 |
| 17 | 3326573 | 3519398 + | NM_001122998 | Tiam2         | 124401 | 3450974 | 3451174 |
| 17 | 3326573 | 3519398 + | NM_001122998 | Tiam2         | 24807  | 3351380 | 3351580 |
| 17 | 3397207 | 3519398 + | NM_011878    | Tiam2         | 53767  | 3450974 | 3451174 |
| 17 | 3519256 | 3557714 - | NM_146074    | Tfb1m         | 1107   | 3556407 | 3556607 |
| 17 | 3557824 | 3559864 + | NR_045302    | 1700102H20Rik | -1217  | 3556407 | 3556607 |
| 17 | 3557824 | 3559864 + | NR_045303    | 1700102H20Rik | -1217  | 3556407 | 3556607 |
| 17 | 4634980 | 4637478 + | NR_130984    | 4930517M08Rik | -8517  | 4626263 | 4626463 |
| 17 | 4995074 | 5347657 + | NM_001085355 | Arid1b        | 76119  | 5071193 | 5071393 |
| 17 | 4995074 | 5347657 + | NM_001085355 | Arid1b        | 159120 | 5154194 | 5154394 |
| 17 | 4995074 | 5347657 + | NM_001085355 | Arid1b        | 99629  | 5094703 | 5094903 |
| 17 | 4995074 | 5347657 + | NM_001085355 | Arid1b        | 15779  | 5010853 | 5011053 |
| 17 | 4995074 | 5347657 + | NM_001085355 | Arid1b        | 58761  | 5053835 | 5054035 |
| 17 | 4995074 | 5347657 + | NM_001085355 | Arid1b        | 12419  | 5007493 | 5007693 |
| 17 | 4995074 | 5347657 + | NM_001085355 | Arid1b        | 2237   | 4997311 | 4997511 |
| 17 | 5410864 | 5440261 - | NM_027457    | Tmem242       | -818   | 5441079 | 5441279 |
| 17 | 5798657 | 5803241 + | NR_045081    | 3300005D01Rik | 0      | 5798551 | 5798751 |
| 17 | 5798657 | 5803241 + | NR_045081    | 3300005D01Rik | 3328   | 5801985 | 5802185 |
| 17 | 5798657 | 5803241 + | NR_045081    | 3300005D01Rik | -1527  | 5796930 | 5797130 |
| 17 | 5799490 | 5803243 + | NR_045079    | 3300005D01Rik | -739   | 5798551 | 5798751 |
| 17 | 5799490 | 5803243 + | NR_045079    | 3300005D01Rik | 2495   | 5801985 | 5802185 |
| 17 | 5799490 | 5803243 + | NR_045079    | 3300005D01Rik | -2360  | 5796930 | 5797130 |
| 17 | 5799490 | 5803241 + | NR_045080    | 3300005D01Rik | -739   | 5798551 | 5798751 |
| 17 | 5799490 | 5803241 + | NR_045080    | 3300005D01Rik | 2495   | 5801985 | 5802185 |
| 17 | 5799490 | 5803241 + | NR_045080    | 3300005D01Rik | -2360  | 5796930 | 5797130 |

|    |          |            |              |               |        |          |          |
|----|----------|------------|--------------|---------------|--------|----------|----------|
| 17 | 5841380  | 5930712 +  | NM_025664    | Snx9          | 21025  | 5862405  | 5862605  |
| 17 | 5841380  | 5930712 +  | NM_025664    | Snx9          | 26971  | 5868351  | 5868551  |
| 17 | 5841380  | 5930712 +  | NM_025664    | Snx9          | 1643   | 5843023  | 5843223  |
| 17 | 5841380  | 5930712 +  | NM_025664    | Snx9          | 14172  | 5855552  | 5855752  |
| 17 | 5841380  | 5930712 +  | NM_025664    | Snx9          | -1549  | 5839631  | 5839831  |
| 17 | 5941280  | 6039391 +  | NM_001113352 | Synj2         | 35762  | 5977042  | 5977242  |
| 17 | 5941280  | 6039391 +  | NM_001113353 | Synj2         | 35762  | 5977042  | 5977242  |
| 17 | 5975586  | 6044291 +  | NM_001113351 | Synj2         | 1456   | 5977042  | 5977242  |
| 17 | 5975586  | 6044291 +  | NM_011523    | Synj2         | 1456   | 5977042  | 5977242  |
| 17 | 6106830  | 6240638 +  | NM_001103181 | Tulp4         | 66201  | 6173031  | 6173231  |
| 17 | 6138148  | 6240638 +  | NM_054040    | Tulp4         | 34883  | 6173031  | 6173231  |
| 17 | 6270470  | 6308315 +  | NM_001033178 | Tmem181a      | -112   | 6270158  | 6270358  |
| 17 | 6942480  | 6987130 -  | NM_009510    | Ezr           | 15728  | 6971202  | 6971402  |
| 17 | 6942480  | 6987130 -  | NM_009510    | Ezr           | 560    | 6986370  | 6986570  |
| 17 | 6942480  | 6987130 -  | NM_009510    | Ezr           | 8589   | 6978341  | 6978541  |
| 17 | 6942480  | 6987130 -  | NM_009510    | Ezr           | 35917  | 6951013  | 6951213  |
| 17 | 6942480  | 6987130 -  | NM_009510    | Ezr           | 25737  | 6961193  | 6961393  |
| 17 | 6942480  | 6987130 -  | NM_009510    | Ezr           | 20697  | 6966233  | 6966433  |
| 17 | 6942480  | 6987130 -  | NM_009510    | Ezr           | 26445  | 6960485  | 6960685  |
| 17 | 7931433  | 7997840 -  | NM_001081416 | Fndc1         | 40346  | 7957294  | 7957494  |
| 17 | 8486231  | 8503984 -  | NR_073374    | 4930506C21Rik | 45     | 8503739  | 8503939  |
| 17 | 8503968  | 8520308 +  | NM_134114    | Sft2d1        | -29    | 8503739  | 8503939  |
| 17 | 8565261  | 8615592 +  | NM_001161832 | T2            | 18906  | 8584167  | 8584367  |
| 17 | 8565261  | 8615592 +  | NM_001161832 | T2            | -4507  | 8560554  | 8560754  |
| 17 | 8571910  | 8582334 -  | NR_045795    | Gm16702       | -1833  | 8584167  | 8584367  |
| 17 | 8719666  | 9179514 +  | NM_001290707 | Pde10a        | 71044  | 8790710  | 8790910  |
| 17 | 8719666  | 9179514 +  | NM_001290707 | Pde10a        | 452366 | 9172032  | 9172232  |
| 17 | 8994610  | 9179514 +  | NM_011866    | Pde10a        | 177422 | 9172032  | 9172232  |
| 17 | 9181198  | 9201185 +  | NM_025851    | 1700010I14Rik | -8966  | 9172032  | 9172232  |
| 17 | 10399336 | 10512227 - | NM_001159517 | Qk            | 13094  | 10498933 | 10499133 |

|    |          |            |              |         |         |          |          |
|----|----------|------------|--------------|---------|---------|----------|----------|
| 17 | 10403045 | 10512227 - | NM_001159516 | Qk      | 13094   | 10498933 | 10499133 |
| 17 | 10403045 | 10512227 - | NM_021881    | Qk      | 13094   | 10498933 | 10499133 |
| 17 | 11033250 | 12256227 + | NM_016694    | Park2   | 1202242 | 12235492 | 12235692 |
| 17 | 12312150 | 12412507 + | NM_026644    | Agpat4  | 76302   | 12388452 | 12388652 |
| 17 | 12312150 | 12412507 + | NM_026644    | Agpat4  | 86067   | 12398217 | 12398417 |
| 17 | 12312150 | 12412507 + | NM_026644    | Agpat4  | 13577   | 12325727 | 12325927 |
| 17 | 12420487 | 12511527 - | NM_011948    | Map3k4  | 10090   | 12501237 | 12501437 |
| 17 | 12420487 | 12511527 - | NM_011948    | Map3k4  | -9599   | 12521126 | 12521326 |
| 17 | 12420487 | 12511527 - | NM_011948    | Map3k4  | -8869   | 12520396 | 12520596 |
| 17 | 12841741 | 12868705 - | NM_009202    | Slc22a1 | 1067    | 12867438 | 12867638 |
| 17 | 12841741 | 12868705 - | NM_009202    | Slc22a1 | 16226   | 12852279 | 12852479 |
| 17 | 12875272 | 12962573 - | NM_010515    | Igf2r   | 45489   | 12916884 | 12917084 |
| 17 | 12934177 | 13008424 + | NR_002853    | Airn    | 51579   | 12985756 | 12985956 |
| 17 | 12934177 | 13008424 + | NR_002853    | Airn    | 49492   | 12983669 | 12983869 |
| 17 | 12934177 | 13022990 + | NR_027772    | Airn    | 51579   | 12985756 | 12985956 |
| 17 | 12934177 | 13022990 + | NR_027772    | Airn    | 49492   | 12983669 | 12983869 |
| 17 | 12934177 | 13052751 + | NR_027773    | Airn    | 51579   | 12985756 | 12985956 |
| 17 | 12934177 | 13052751 + | NR_027773    | Airn    | 49492   | 12983669 | 12983869 |
| 17 | 12934177 | 13008424 + | NR_027784    | Airn    | 51579   | 12985756 | 12985956 |
| 17 | 12934177 | 13008424 + | NR_027784    | Airn    | 49492   | 12983669 | 12983869 |
| 17 | 13159665 | 13185126 - | NM_001113533 | Wtap    | -4036   | 13189162 | 13189362 |
| 17 | 13163886 | 13185126 - | NM_001113532 | Wtap    | -4036   | 13189162 | 13189362 |
| 17 | 13163886 | 13185406 - | NM_175394    | Wtap    | -3756   | 13189162 | 13189362 |
| 17 | 13853443 | 13898402 - | NM_022311    | Tcte2   | 26311   | 13871891 | 13872091 |
| 17 | 15487777 | 15491426 - | NR_033511    | Gm10510 | -3166   | 15494592 | 15494792 |
| 17 | 15487777 | 15491426 - | NR_033511    | Gm10510 | -2263   | 15493689 | 15493889 |
| 17 | 15504318 | 15512788 - | NM_007865    | Dll1    | 1083    | 15511505 | 15511705 |
| 17 | 15680043 | 15700288 - | NM_144809    | Prdm9   | -9378   | 15709666 | 15709866 |
| 17 | 21145905 | 21165821 + | NM_145483    | Zfp160  | 9812    | 21155717 | 21155917 |
| 17 | 22561235 | 22593657 + | NM_198003    | Zfp946  | 0       | 22561155 | 22561355 |

|    |          |            |              |               |       |          |          |
|----|----------|------------|--------------|---------------|-------|----------|----------|
| 17 | 23687766 | 23702262 + | NR_126484    | 6330415G19Rik | 13628 | 23701394 | 23701594 |
| 17 | 23687766 | 23702262 + | NR_126484    | 6330415G19Rik | -382  | 23687184 | 23687384 |
| 17 | 23687766 | 23702262 + | NR_126484    | 6330415G19Rik | 12877 | 23700643 | 23700843 |
| 17 | 23687766 | 23698602 + | NR_126485    | 6330415G19Rik | -382  | 23687184 | 23687384 |
| 17 | 23693734 | 23701194 - | NM_001033496 | Zfp213        | -200  | 23701394 | 23701594 |
| 17 | 23693734 | 23701194 - | NM_001033496 | Zfp213        | 351   | 23700643 | 23700843 |
| 17 | 23970328 | 23972735 - | NM_001081399 | Prss33        | -8178 | 23980913 | 23981113 |
| 17 | 23973752 | 23981124 - | NM_027644    | Prss41        | -6598 | 23987722 | 23987922 |
| 17 | 23973752 | 23981124 - | NM_027644    | Prss41        | 11    | 23980913 | 23981113 |
| 17 | 23990739 | 23996744 + | NM_027220    | Prss32        | -2817 | 23987722 | 23987922 |
| 17 | 23990739 | 23996744 + | NM_027220    | Prss32        | -9626 | 23980913 | 23981113 |
| 17 | 24005039 | 24010081 + | NM_020487    | Prss21        | 3563  | 24008602 | 24008802 |
| 17 | 24017843 | 24019821 + | NM_019910    | Dcpp1         | -9041 | 24008602 | 24008802 |
| 17 | 24090052 | 24092241 - | NM_001077421 | Sbpl          | -6197 | 24098438 | 24098638 |
| 17 | 24109094 | 24112198 - | NM_013921    | Prss30        | 84    | 24111914 | 24112114 |
| 17 | 24130501 | 24135068 - | NM_133731    | Prss22        | -4759 | 24139827 | 24140027 |
| 17 | 24184687 | 24210453 - | NM_027008    | Kctd5         | 16199 | 24194054 | 24194254 |
| 17 | 24210647 | 24278562 - | NM_001080773 | Pdpk1         | 2530  | 24275832 | 24276032 |
| 17 | 24210647 | 24287890 - | NM_001286662 | Pdpk1         | 11858 | 24275832 | 24276032 |
| 17 | 24210647 | 24278562 - | NM_011062    | Pdpk1         | 2530  | 24275832 | 24276032 |
| 17 | 24292800 | 24300701 - | NM_172935    | Amdhd2        | 388   | 24300113 | 24300313 |
| 17 | 24312376 | 24342508 - | NM_001163847 | Tbc1d24       | 1171  | 24341137 | 24341337 |
| 17 | 24312376 | 24342508 - | NM_001163847 | Tbc1d24       | -766  | 24343274 | 24343474 |
| 17 | 24312376 | 24342508 - | NM_001163847 | Tbc1d24       | 3978  | 24338330 | 24338530 |
| 17 | 24312376 | 24342508 - | NM_001163847 | Tbc1d24       | 2272  | 24340036 | 24340236 |
| 17 | 24312376 | 24342508 - | NM_001163848 | Tbc1d24       | 1171  | 24341137 | 24341337 |
| 17 | 24312376 | 24342508 - | NM_001163848 | Tbc1d24       | -766  | 24343274 | 24343474 |
| 17 | 24312376 | 24342508 - | NM_001163848 | Tbc1d24       | 3978  | 24338330 | 24338530 |
| 17 | 24312376 | 24342508 - | NM_001163848 | Tbc1d24       | 2272  | 24340036 | 24340236 |
| 17 | 24312376 | 24342508 - | NM_001163849 | Tbc1d24       | 1171  | 24341137 | 24341337 |

|    |          |            |              |               |       |          |          |
|----|----------|------------|--------------|---------------|-------|----------|----------|
| 17 | 24312376 | 24342508 - | NM_001163849 | Tbc1d24       | -766  | 24343274 | 24343474 |
| 17 | 24312376 | 24342508 - | NM_001163849 | Tbc1d24       | 3978  | 24338330 | 24338530 |
| 17 | 24312376 | 24342508 - | NM_001163849 | Tbc1d24       | 2272  | 24340036 | 24340236 |
| 17 | 24312376 | 24342508 - | NM_001163850 | Tbc1d24       | 1171  | 24341137 | 24341337 |
| 17 | 24312376 | 24342508 - | NM_001163850 | Tbc1d24       | -766  | 24343274 | 24343474 |
| 17 | 24312376 | 24342508 - | NM_001163850 | Tbc1d24       | 3978  | 24338330 | 24338530 |
| 17 | 24312376 | 24342508 - | NM_001163850 | Tbc1d24       | 2272  | 24340036 | 24340236 |
| 17 | 24312376 | 24342508 - | NM_001163851 | Tbc1d24       | 1171  | 24341137 | 24341337 |
| 17 | 24312376 | 24342508 - | NM_001163851 | Tbc1d24       | -766  | 24343274 | 24343474 |
| 17 | 24312376 | 24342508 - | NM_001163851 | Tbc1d24       | 3978  | 24338330 | 24338530 |
| 17 | 24312376 | 24342508 - | NM_001163851 | Tbc1d24       | 2272  | 24340036 | 24340236 |
| 17 | 24312376 | 24336903 - | NM_001163852 | Tbc1d24       | -4234 | 24341137 | 24341337 |
| 17 | 24312376 | 24336903 - | NM_001163852 | Tbc1d24       | -6371 | 24343274 | 24343474 |
| 17 | 24312376 | 24336903 - | NM_001163852 | Tbc1d24       | -1427 | 24338330 | 24338530 |
| 17 | 24312376 | 24336903 - | NM_001163852 | Tbc1d24       | -3133 | 24340036 | 24340236 |
| 17 | 24312376 | 24336903 - | NM_001163853 | Tbc1d24       | -4234 | 24341137 | 24341337 |
| 17 | 24312376 | 24336903 - | NM_001163853 | Tbc1d24       | -6371 | 24343274 | 24343474 |
| 17 | 24312376 | 24336903 - | NM_001163853 | Tbc1d24       | -1427 | 24338330 | 24338530 |
| 17 | 24312376 | 24336903 - | NM_001163853 | Tbc1d24       | -3133 | 24340036 | 24340236 |
| 17 | 24312376 | 24342508 - | NM_173186    | Tbc1d24       | 1171  | 24341137 | 24341337 |
| 17 | 24312376 | 24342508 - | NM_173186    | Tbc1d24       | -766  | 24343274 | 24343474 |
| 17 | 24312376 | 24342508 - | NM_173186    | Tbc1d24       | 3978  | 24338330 | 24338530 |
| 17 | 24312376 | 24342508 - | NM_173186    | Tbc1d24       | 2272  | 24340036 | 24340236 |
| 17 | 24340791 | 24346333 - | NM_010947    | Ntn3          | 4996  | 24341137 | 24341337 |
| 17 | 24340791 | 24346333 - | NM_010947    | Ntn3          | 2859  | 24343274 | 24343474 |
| 17 | 24352001 | 24357715 - | NM_028056    | 1600002H07Rik | -104  | 24357819 | 24358019 |
| 17 | 24546426 | 24551459 - | NR_033554    | D330041H03Rik | -3967 | 24555426 | 24555626 |
| 17 | 24551620 | 24562843 + | NM_001080127 | Rnps1         | 3806  | 24555426 | 24555626 |
| 17 | 24551620 | 24562843 + | NM_001080128 | Rnps1         | 3806  | 24555426 | 24555626 |
| 17 | 24551620 | 24562843 + | NM_009070    | Rnps1         | 3806  | 24555426 | 24555626 |



|    |          |            |              |          |       |          |          |
|----|----------|------------|--------------|----------|-------|----------|----------|
| 17 | 24563628 | 24576262 + | NM_010023    | Eci1     | -8002 | 24555426 | 24555626 |
| 17 | 24580723 | 24592338 - | NM_001301784 | E4f1     | 500   | 24591638 | 24591838 |
| 17 | 24580723 | 24592338 - | NM_007893    | E4f1     | 500   | 24591638 | 24591838 |
| 17 | 24580723 | 24592338 - | NR_125990    | E4f1     | 500   | 24591638 | 24591838 |
| 17 | 24610495 | 24616024 - | NM_001252463 | MIst8    | 0     | 24615873 | 24616073 |
| 17 | 24610495 | 24616024 - | NM_001252464 | MIst8    | 0     | 24615873 | 24616073 |
| 17 | 24610495 | 24616024 - | NM_001252465 | MIst8    | 0     | 24615873 | 24616073 |
| 17 | 24610495 | 24616024 - | NM_019988    | MIst8    | 0     | 24615873 | 24616073 |
| 17 | 24625728 | 24645853 + | NM_027937    | Caskin1  | -9655 | 24615873 | 24616073 |
| 17 | 24645795 | 24664884 - | NM_001172113 | Traf7    | -771  | 24665655 | 24665855 |
| 17 | 24645795 | 24664884 - | NM_001172113 | Traf7    | 322   | 24664362 | 24664562 |
| 17 | 24645795 | 24664884 - | NM_001172114 | Traf7    | -771  | 24665655 | 24665855 |
| 17 | 24645795 | 24664884 - | NM_001172114 | Traf7    | 322   | 24664362 | 24664562 |
| 17 | 24645795 | 24664884 - | NM_153792    | Traf7    | -771  | 24665655 | 24665855 |
| 17 | 24645795 | 24664884 - | NM_153792    | Traf7    | 322   | 24664362 | 24664562 |
| 17 | 24665196 | 24665690 + | NR_045289    | Rab26os  | 459   | 24665655 | 24665855 |
| 17 | 24665196 | 24665690 + | NR_045289    | Rab26os  | -634  | 24664362 | 24664562 |
| 17 | 24732761 | 24769573 - | NM_001039363 | Tsc2     | 3742  | 24765631 | 24765831 |
| 17 | 24732761 | 24769573 - | NM_001286713 | Tsc2     | 3742  | 24765631 | 24765831 |
| 17 | 24732761 | 24769573 - | NM_001286714 | Tsc2     | 3742  | 24765631 | 24765831 |
| 17 | 24732761 | 24769573 - | NM_001286716 | Tsc2     | 3742  | 24765631 | 24765831 |
| 17 | 24732761 | 24769573 - | NM_001286718 | Tsc2     | 3742  | 24765631 | 24765831 |
| 17 | 24732761 | 24769573 - | NM_001286720 | Tsc2     | 3742  | 24765631 | 24765831 |
| 17 | 24732761 | 24769573 - | NM_011647    | Tsc2     | 3742  | 24765631 | 24765831 |
| 17 | 24769627 | 24775784 + | NM_008743    | Nthl1    | -3796 | 24765631 | 24765831 |
| 17 | 24776227 | 24787251 - | NM_023055    | Slc9a3r2 | -4843 | 24792094 | 24792294 |
| 17 | 24985841 | 24987248 - | NM_023480    | Fahd1    | 1497  | 24985551 | 24985751 |
| 17 | 24985841 | 24987248 - | NM_023480    | Fahd1    | 581   | 24986467 | 24986667 |
| 17 | 24987435 | 25001396 + | NM_024284    | Hagh     | -1684 | 24985551 | 24985751 |
| 17 | 24987435 | 25001396 + | NM_024284    | Hagh     | -768  | 24986467 | 24986667 |

|    |          |            |              |               |       |          |          |
|----|----------|------------|--------------|---------------|-------|----------|----------|
| 17 | 24987612 | 25001396 + | NM_001159626 | Hagh          | -1861 | 24985551 | 24985751 |
| 17 | 24987612 | 25001396 + | NM_001159626 | Hagh          | -945  | 24986467 | 24986667 |
| 17 | 25321506 | 25324608 + | NM_183150    | BC003965      | -25   | 25321281 | 25321481 |
| 17 | 25325345 | 25371388 + | NM_001197024 | Unkl          | -3864 | 25321281 | 25321481 |
| 17 | 25325859 | 25371389 + | NM_001290736 | Unkl          | -4378 | 25321281 | 25321481 |
| 17 | 25397456 | 25410860 - | NM_001177609 | Ube2i         | -8213 | 25419073 | 25419273 |
| 17 | 25397456 | 25410377 - | NM_001177610 | Ube2i         | -8696 | 25419073 | 25419273 |
| 17 | 25397456 | 25411256 - | NM_011665    | Ube2i         | -7817 | 25419073 | 25419273 |
| 17 | 25511232 | 25570729 - | NM_001163691 | Cacna1h       | 36056 | 25534473 | 25534673 |
| 17 | 25511232 | 25570729 - | NM_021415    | Cacna1h       | 36056 | 25534473 | 25534673 |
| 17 | 25965988 | 25968789 + | NM_028101    | Jmjd8         | 0     | 25965846 | 25966046 |
| 17 | 25968310 | 25968374 - | NR_037243    | Mir3082       | 2328  | 25965846 | 25966046 |
| 17 | 25971410 | 25974073 - | NM_144816    | Rhbdl1        | -6894 | 25980967 | 25981167 |
| 17 | 25975783 | 25981797 - | NM_145999    | Rhot2         | 630   | 25980967 | 25981167 |
| 17 | 25981679 | 25998461 - | NM_001163766 | Wdr90         | -6427 | 26004888 | 26005088 |
| 17 | 26000643 | 26005684 - | NM_026633    | Fam195a       | 596   | 26004888 | 26005088 |
| 17 | 26012445 | 26014109 + | NM_026686    | 0610011F06Rik | -7357 | 26004888 | 26005088 |
| 17 | 26019059 | 26056660 - | NM_139154    | Rab40c        | -572  | 26057232 | 26057432 |
| 17 | 26125981 | 26206123 - | NM_001162868 | Rab11fip3     | 65887 | 26140036 | 26140236 |
| 17 | 26125981 | 26206123 - | NM_001162868 | Rab11fip3     | -862  | 26206985 | 26207185 |
| 17 | 26125981 | 26206123 - | NM_001162868 | Rab11fip3     | 59435 | 26146488 | 26146688 |
| 17 | 26125981 | 26206123 - | NM_001162869 | Rab11fip3     | 65887 | 26140036 | 26140236 |
| 17 | 26125981 | 26206123 - | NM_001162869 | Rab11fip3     | -862  | 26206985 | 26207185 |
| 17 | 26125981 | 26206123 - | NM_001162869 | Rab11fip3     | 59435 | 26146488 | 26146688 |
| 17 | 26125981 | 26158806 - | NM_153140    | Rab11fip3     | 18570 | 26140036 | 26140236 |
| 17 | 26125981 | 26158806 - | NM_153140    | Rab11fip3     | 12118 | 26146488 | 26146688 |
| 17 | 26250261 | 26260199 + | NM_021793    | Tmem8         | 9133  | 26259394 | 26259594 |
| 17 | 26260448 | 26263559 + | NM_024227    | Mrpl28        | -854  | 26259394 | 26259594 |
| 17 | 26275631 | 26332757 + | NM_001159598 | Axin1         | -4567 | 26270864 | 26271064 |
| 17 | 26275631 | 26332757 + | NM_009733    | Axin1         | -4567 | 26270864 | 26271064 |

|    |          |            |              |           |       |          |          |
|----|----------|------------|--------------|-----------|-------|----------|----------|
| 17 | 26349637 | 26381188 - | NM_001206335 | Itfg3     | 6481  | 26374507 | 26374707 |
| 17 | 26349637 | 26381188 - | NM_001206335 | Itfg3     | -1945 | 26383133 | 26383333 |
| 17 | 26349637 | 26381188 - | NM_001206335 | Itfg3     | 3187  | 26377801 | 26378001 |
| 17 | 26349637 | 26381188 - | NM_001206335 | Itfg3     | 3816  | 26377172 | 26377372 |
| 17 | 26349637 | 26381188 - | NM_207217    | Itfg3     | 6481  | 26374507 | 26374707 |
| 17 | 26349637 | 26381188 - | NM_207217    | Itfg3     | -1945 | 26383133 | 26383333 |
| 17 | 26349637 | 26381188 - | NM_207217    | Itfg3     | 3187  | 26377801 | 26378001 |
| 17 | 26349637 | 26381188 - | NM_207217    | Itfg3     | 3816  | 26377172 | 26377372 |
| 17 | 26389855 | 26417676 + | NM_025881    | Luc7l     | -6522 | 26383133 | 26383333 |
| 17 | 26389855 | 26422452 + | NM_028190    | Luc7l     | -6522 | 26383133 | 26383333 |
| 17 | 26389855 | 26417676 + | NR_037905    | Luc7l     | -6522 | 26383133 | 26383333 |
| 17 | 26389855 | 26417676 + | NR_037906    | Luc7l     | -6522 | 26383133 | 26383333 |
| 17 | 26551910 | 26583288 + | NM_001081656 | Neurl1b   | 9494  | 26561404 | 26561604 |
| 17 | 26551910 | 26583288 + | NM_001081656 | Neurl1b   | 18375 | 26570285 | 26570485 |
| 17 | 26551910 | 26583288 + | NM_001081656 | Neurl1b   | 16307 | 26568217 | 26568417 |
| 17 | 26551910 | 26583288 + | NM_001081656 | Neurl1b   | 2582  | 26554492 | 26554692 |
| 17 | 26852595 | 26913572 + | NM_029870    | Crebrf    | 3867  | 26856462 | 26856662 |
| 17 | 26975610 | 26978511 - | NM_008700    | Nkx2-5    | -2629 | 26981140 | 26981340 |
| 17 | 27194249 | 27259169 + | NM_080553    | Itpr3     | 9821  | 27204070 | 27204270 |
| 17 | 27194249 | 27259169 + | NM_080553    | Itpr3     | 26394 | 27220643 | 27220843 |
| 17 | 27194249 | 27259169 + | NM_080553    | Itpr3     | 8898  | 27203147 | 27203347 |
| 17 | 27228190 | 27228257 + | NR_106142    | Mir7677   | -7347 | 27220643 | 27220843 |
| 17 | 27465330 | 27465406 + | NR_106075    | Mir7216   | 694   | 27466024 | 27466224 |
| 17 | 27492683 | 27492745 + | NR_106076    | Mir7217   | -6063 | 27486420 | 27486620 |
| 17 | 27495042 | 27495101 + | NR_106077    | Mir7218   | -8422 | 27486420 | 27486620 |
| 17 | 27559333 | 27640479 - | NM_001013385 | Grm4      | 61522 | 27578757 | 27578957 |
| 17 | 27562849 | 27640479 - | NM_001291045 | Grm4      | 61522 | 27578757 | 27578957 |
| 17 | 27888177 | 27957488 - | NM_001033279 | D17Wsu92e | 15456 | 27941832 | 27942032 |
| 17 | 27888177 | 27957488 - | NM_001033279 | D17Wsu92e | 683   | 27956605 | 27956805 |
| 17 | 27888177 | 27957488 - | NM_001033279 | D17Wsu92e | 1359  | 27955929 | 27956129 |

|    |          |            |              |               |       |          |          |
|----|----------|------------|--------------|---------------|-------|----------|----------|
| 17 | 27888177 | 27957488 - | NM_001033279 | D17Wsu92e     | 23339 | 27933949 | 27934149 |
| 17 | 27888177 | 27957488 - | NM_001033279 | D17Wsu92e     | 18074 | 27939214 | 27939414 |
| 17 | 27888177 | 27957488 - | NM_001033279 | D17Wsu92e     | 27774 | 27929514 | 27929714 |
| 17 | 27888177 | 27957488 - | NM_001033279 | D17Wsu92e     | 51296 | 27905992 | 27906192 |
| 17 | 27888177 | 27957488 - | NM_001044719 | D17Wsu92e     | 15456 | 27941832 | 27942032 |
| 17 | 27888177 | 27957488 - | NM_001044719 | D17Wsu92e     | 683   | 27956605 | 27956805 |
| 17 | 27888177 | 27957488 - | NM_001044719 | D17Wsu92e     | 1359  | 27955929 | 27956129 |
| 17 | 27888177 | 27957488 - | NM_001044719 | D17Wsu92e     | 23339 | 27933949 | 27934149 |
| 17 | 27888177 | 27957488 - | NM_001044719 | D17Wsu92e     | 18074 | 27939214 | 27939414 |
| 17 | 27888177 | 27957488 - | NM_001044719 | D17Wsu92e     | 27774 | 27929514 | 27929714 |
| 17 | 27888177 | 27957488 - | NM_001044719 | D17Wsu92e     | 51296 | 27905992 | 27906192 |
| 17 | 27888177 | 27957488 - | NM_001271511 | D17Wsu92e     | 15456 | 27941832 | 27942032 |
| 17 | 27888177 | 27957488 - | NM_001271511 | D17Wsu92e     | 683   | 27956605 | 27956805 |
| 17 | 27888177 | 27957488 - | NM_001271511 | D17Wsu92e     | 1359  | 27955929 | 27956129 |
| 17 | 27888177 | 27957488 - | NM_001271511 | D17Wsu92e     | 23339 | 27933949 | 27934149 |
| 17 | 27888177 | 27957488 - | NM_001271511 | D17Wsu92e     | 18074 | 27939214 | 27939414 |
| 17 | 27888177 | 27957488 - | NM_001271511 | D17Wsu92e     | 27774 | 27929514 | 27929714 |
| 17 | 27888177 | 27957488 - | NM_001271511 | D17Wsu92e     | 51296 | 27905992 | 27906192 |
| 17 | 27977032 | 27988913 + | NM_011432    | Snrpc         | -6941 | 27969891 | 27970091 |
| 17 | 27977032 | 27988913 + | NM_011432    | Snrpc         | -3490 | 27973342 | 27973542 |
| 17 | 28203692 | 28217585 - | NM_001085555 | Tcp11         | -2192 | 28219777 | 28219977 |
| 17 | 28203692 | 28217530 - | NM_013687    | Tcp11         | -2247 | 28219777 | 28219977 |
| 17 | 28264296 | 28410568 - | NR_039557.1  | Mir5098       | -5814 | 28416382 | 28416582 |
| 17 | 28264296 | 28410568 - | NR_039557.1  | Mir5098       | 1595  | 28408773 | 28408973 |
| 17 | 28264296 | 28410568 - | NR_039557.1  | Mir5098       | 3256  | 28407112 | 28407312 |
| 17 | 28369699 | 28438415 + | NM_011145    | Ppard         | 46683 | 28416382 | 28416582 |
| 17 | 28369699 | 28438415 + | NM_011145    | Ppard         | 39074 | 28408773 | 28408973 |
| 17 | 28369699 | 28438415 + | NM_011145    | Ppard         | 37413 | 28407112 | 28407312 |
| 17 | 28408653 | 28410109 + | NR_045427    | 1810013A23Rik | 120   | 28408773 | 28408973 |
| 17 | 28408653 | 28410109 + | NR_045427    | 1810013A23Rik | -1341 | 28407112 | 28407312 |

|    |          |            |              |               |       |          |          |
|----|----------|------------|--------------|---------------|-------|----------|----------|
| 17 | 28465416 | 28467979 + | NM_011287    | Rpl10a        | -206  | 28465010 | 28465210 |
| 17 | 28535698 | 28623095 - | NM_010220    | Fkbp5         | -8814 | 28631909 | 28632109 |
| 17 | 28774724 | 28826933 - | NM_001290320 | Slc26a8       | 16889 | 28809844 | 28810044 |
| 17 | 28906262 | 28915650 + | NM_011950    | Mapk13        | 2170  | 28908432 | 28908632 |
| 17 | 28938071 | 28975735 + | NM_001081315 | Brpf3         | 8119  | 28946190 | 28946390 |
| 17 | 28938071 | 28975735 + | NM_001081315 | Brpf3         | 11418 | 28949489 | 28949689 |
| 17 | 28938071 | 28975735 + | NM_001081315 | Brpf3         | 3189  | 28941260 | 28941460 |
| 17 | 29033340 | 29052270 - | NM_172450    | 4930539E08Rik | -5796 | 29058066 | 29058266 |
| 17 | 29033340 | 29052270 - | NM_172450    | 4930539E08Rik | 7944  | 29044126 | 29044326 |
| 17 | 29042210 | 29043717 + | NR_045457    | 1700030A11Rik | 1916  | 29044126 | 29044326 |
| 17 | 29194419 | 29216072 - | NR_036469    | Trp53cor1     | -1842 | 29217914 | 29218114 |
| 17 | 29227931 | 29237668 + | NM_001111099 | Cdkn1a        | -9817 | 29217914 | 29218114 |
| 17 | 29227931 | 29237668 + | NM_001111099 | Cdkn1a        | 4783  | 29232714 | 29232914 |
| 17 | 29227931 | 29237668 + | NM_001111099 | Cdkn1a        | 2907  | 29230838 | 29231038 |
| 17 | 29230717 | 29237668 + | NM_007669    | Cdkn1a        | 1997  | 29232714 | 29232914 |
| 17 | 29230717 | 29237668 + | NM_007669    | Cdkn1a        | 121   | 29230838 | 29231038 |
| 17 | 29272001 | 29285922 + | NM_001002786 | Rab44         | 7419  | 29279420 | 29279620 |
| 17 | 29293466 | 29374736 - | NM_153166    | Cpne5         | 66522 | 29308014 | 29308214 |
| 17 | 29293466 | 29374736 - | NM_153166    | Cpne5         | 72017 | 29302519 | 29302719 |
| 17 | 29469021 | 29484850 - | NM_019880    | Mtch1         | -9927 | 29494777 | 29494977 |
| 17 | 29469021 | 29484850 - | NM_019880    | Mtch1         | 494   | 29484156 | 29484356 |
| 17 | 29497859 | 29516481 + | NM_001159538 | Fgd2          | -2882 | 29494777 | 29494977 |
| 17 | 29497859 | 29516481 + | NM_013710    | Fgd2          | -2882 | 29494777 | 29494977 |
| 17 | 29662963 | 29686539 - | NM_001162901 | Tmem217       | -7311 | 29693850 | 29694050 |
| 17 | 29662963 | 29686539 - | NM_001162901 | Tmem217       | -1718 | 29688257 | 29688457 |
| 17 | 29662963 | 29686539 - | NM_001162901 | Tmem217       | -4689 | 29691228 | 29691428 |
| 17 | 29662963 | 29686539 - | NM_001162902 | Tmem217       | -7311 | 29693850 | 29694050 |
| 17 | 29662963 | 29686539 - | NM_001162902 | Tmem217       | -1718 | 29688257 | 29688457 |
| 17 | 29662963 | 29686539 - | NM_001162902 | Tmem217       | -4689 | 29691228 | 29691428 |
| 17 | 29686747 | 29743754 + | NM_198647    | Tbc1d22b      | 7103  | 29693850 | 29694050 |

|    |          |            |              |          |        |          |          |
|----|----------|------------|--------------|----------|--------|----------|----------|
| 17 | 29686747 | 29743754 + | NM_198647    | Tbc1d22b | 1510   | 29688257 | 29688457 |
| 17 | 29686747 | 29743754 + | NM_198647    | Tbc1d22b | 4481   | 29691228 | 29691428 |
| 17 | 29832922 | 29853963 - | NM_001163741 | Ccdc167  | -7348  | 29861311 | 29861511 |
| 17 | 29840277 | 29853963 - | NM_026782    | Ccdc167  | -7348  | 29861311 | 29861511 |
| 17 | 30142032 | 30346966 + | NM_148926    | Zfand3   | 3008   | 30145040 | 30145240 |
| 17 | 30142032 | 30346966 + | NM_148926    | Zfand3   | 88395  | 30230427 | 30230627 |
| 17 | 30142032 | 30346966 + | NM_148926    | Zfand3   | 115910 | 30257942 | 30258142 |
| 17 | 30142032 | 30346966 + | NM_148926    | Zfand3   | 58797  | 30200829 | 30201029 |
| 17 | 30142032 | 30346966 + | NM_148926    | Zfand3   | 22562  | 30164594 | 30164794 |
| 17 | 30352469 | 30713233 - | NM_027060    | Btbd9    | 7060   | 30705973 | 30706173 |
| 17 | 30352469 | 30713233 - | NM_027060    | Btbd9    | 318422 | 30394611 | 30394811 |
| 17 | 30352469 | 30713233 - | NM_027060    | Btbd9    | 90433  | 30622600 | 30622800 |
| 17 | 30352469 | 30713233 - | NM_027060    | Btbd9    | 49566  | 30663467 | 30663667 |
| 17 | 30352469 | 30713233 - | NM_027060    | Btbd9    | 158820 | 30554213 | 30554413 |
| 17 | 30352469 | 30713233 - | NM_027060    | Btbd9    | 288387 | 30424646 | 30424846 |
| 17 | 30352469 | 30713233 - | NM_172618    | Btbd9    | 7060   | 30705973 | 30706173 |
| 17 | 30352469 | 30713233 - | NM_172618    | Btbd9    | 318422 | 30394611 | 30394811 |
| 17 | 30352469 | 30713233 - | NM_172618    | Btbd9    | 90433  | 30622600 | 30622800 |
| 17 | 30352469 | 30713233 - | NM_172618    | Btbd9    | 49566  | 30663467 | 30663667 |
| 17 | 30352469 | 30713233 - | NM_172618    | Btbd9    | 158820 | 30554213 | 30554413 |
| 17 | 30352469 | 30713233 - | NM_172618    | Btbd9    | 288387 | 30424646 | 30424846 |
| 17 | 30393402 | 30393481 - | NR_105839    | Mir6412  | -1130  | 30394611 | 30394811 |
| 17 | 30729807 | 30749605 - | NM_001113560 | Glo1     | 6111   | 30743294 | 30743494 |
| 17 | 30729807 | 30749605 - | NM_025374    | Glo1     | 6111   | 30743294 | 30743494 |
| 17 | 31262251 | 31266557 - | NM_011575    | Tff3     | -5419  | 31271976 | 31272176 |
| 17 | 31262251 | 31266557 - | NM_011575    | Tff3     | -2964  | 31269521 | 31269721 |
| 17 | 31432428 | 31487644 + | NM_153062    | Slc37a1  | 46012  | 31478440 | 31478640 |
| 17 | 31432428 | 31487644 + | NM_153062    | Slc37a1  | 9484   | 31441912 | 31442112 |
| 17 | 31432428 | 31487644 + | NM_153062    | Slc37a1  | 29336  | 31461764 | 31461964 |
| 17 | 31432428 | 31487644 + | NM_153062    | Slc37a1  | 29760  | 31462188 | 31462388 |

|    |          |            |              |         |       |          |          |
|----|----------|------------|--------------|---------|-------|----------|----------|
| 17 | 31432428 | 31487644 + | NM_153062    | Slc37a1 | 28080 | 31460508 | 31460708 |
| 17 | 31433169 | 31487644 + | NM_001242427 | Slc37a1 | 45271 | 31478440 | 31478640 |
| 17 | 31433169 | 31487644 + | NM_001242427 | Slc37a1 | 8743  | 31441912 | 31442112 |
| 17 | 31433169 | 31487644 + | NM_001242427 | Slc37a1 | 28595 | 31461764 | 31461964 |
| 17 | 31433169 | 31487644 + | NM_001242427 | Slc37a1 | 29019 | 31462188 | 31462388 |
| 17 | 31433169 | 31487644 + | NM_001242427 | Slc37a1 | 27339 | 31460508 | 31460708 |
| 17 | 31523179 | 31613255 + | NM_001163748 | Pde9a   | 46265 | 31569444 | 31569644 |
| 17 | 31523179 | 31613255 + | NM_001163748 | Pde9a   | 37285 | 31560464 | 31560664 |
| 17 | 31523179 | 31613255 + | NM_001163748 | Pde9a   | 38507 | 31561686 | 31561886 |
| 17 | 31523179 | 31613255 + | NM_001163748 | Pde9a   | 4449  | 31527628 | 31527828 |
| 17 | 31523179 | 31613255 + | NM_001163748 | Pde9a   | -1493 | 31521486 | 31521686 |
| 17 | 31523179 | 31613255 + | NM_008804    | Pde9a   | 46265 | 31569444 | 31569644 |
| 17 | 31523179 | 31613255 + | NM_008804    | Pde9a   | 37285 | 31560464 | 31560664 |
| 17 | 31523179 | 31613255 + | NM_008804    | Pde9a   | 38507 | 31561686 | 31561886 |
| 17 | 31523179 | 31613255 + | NM_008804    | Pde9a   | 4449  | 31527628 | 31527828 |
| 17 | 31523179 | 31613255 + | NM_008804    | Pde9a   | -1493 | 31521486 | 31521686 |
| 17 | 31784027 | 31795700 - | NM_001163769 | U2af1   | -279  | 31795979 | 31796179 |
| 17 | 31784027 | 31795700 - | NM_024187    | U2af1   | -279  | 31795979 | 31796179 |
| 17 | 32213028 | 32228369 - | NR_027316    | Pdxk-ps | -8462 | 32236831 | 32237031 |
| 17 | 32440617 | 32458184 - | NM_019774    | Akap8   | 794   | 32457190 | 32457390 |
| 17 | 32440617 | 32458184 - | NM_019774    | Akap8   | 5     | 32457979 | 32458179 |
| 17 | 32440617 | 32458184 - | NR_131218    | Akap8   | 794   | 32457190 | 32457390 |
| 17 | 32440617 | 32458184 - | NR_131218    | Akap8   | 5     | 32457979 | 32458179 |
| 17 | 32440617 | 32458184 - | NR_131219    | Akap8   | 794   | 32457190 | 32457390 |
| 17 | 32440617 | 32458184 - | NR_131219    | Akap8   | 5     | 32457979 | 32458179 |
| 17 | 32458369 | 32487523 - | NM_017476    | Akap8l  | 1272  | 32486051 | 32486251 |
| 17 | 32643407 | 32665840 + | NM_001101445 | Cyp4f17 | -198  | 32643009 | 32643209 |
| 17 | 32673574 | 32688743 + | NM_024442    | Cyp4f16 | -871  | 32672503 | 32672703 |
| 17 | 32673574 | 32688743 + | NM_024442    | Cyp4f16 | -1990 | 32671384 | 32671584 |
| 17 | 32796428 | 32813426 + | NM_001101588 | Cyp4f40 | -520  | 32795708 | 32795908 |

|    |          |            |              |         |       |          |          |
|----|----------|------------|--------------|---------|-------|----------|----------|
| 17 | 32822604 | 32840295 + | NM_134127    | Cyp4f15 | -687  | 32821717 | 32821917 |
| 17 | 32902442 | 32925233 - | NM_172458    | Zfp871  | 16099 | 32908934 | 32909134 |
| 17 | 32902442 | 32925233 - | NM_172458    | Zfp871  | 8724  | 32916309 | 32916509 |
| 17 | 33042015 | 33054275 - | NM_001204333 | Cyp4f14 | -7592 | 33061867 | 33062067 |
| 17 | 33042015 | 33054275 - | NM_001204333 | Cyp4f14 | -1877 | 33056152 | 33056352 |
| 17 | 33042015 | 33054275 - | NM_001204333 | Cyp4f14 | 3928  | 33050147 | 33050347 |
| 17 | 33042015 | 33054275 - | NM_001204334 | Cyp4f14 | -7592 | 33061867 | 33062067 |
| 17 | 33042015 | 33054275 - | NM_001204334 | Cyp4f14 | -1877 | 33056152 | 33056352 |
| 17 | 33042015 | 33054275 - | NM_001204334 | Cyp4f14 | 3928  | 33050147 | 33050347 |
| 17 | 33042015 | 33054288 - | NM_001204335 | Cyp4f14 | -7579 | 33061867 | 33062067 |
| 17 | 33042015 | 33054288 - | NM_001204335 | Cyp4f14 | -1864 | 33056152 | 33056352 |
| 17 | 33042015 | 33054288 - | NM_001204335 | Cyp4f14 | 3941  | 33050147 | 33050347 |
| 17 | 33042015 | 33054288 - | NM_001204336 | Cyp4f14 | -7579 | 33061867 | 33062067 |
| 17 | 33042015 | 33054288 - | NM_001204336 | Cyp4f14 | -1864 | 33056152 | 33056352 |
| 17 | 33042015 | 33054288 - | NM_001204336 | Cyp4f14 | 3941  | 33050147 | 33050347 |
| 17 | 33042015 | 33054033 - | NM_022434    | Cyp4f14 | -7834 | 33061867 | 33062067 |
| 17 | 33042015 | 33054033 - | NM_022434    | Cyp4f14 | -2119 | 33056152 | 33056352 |
| 17 | 33042015 | 33054033 - | NM_022434    | Cyp4f14 | 3686  | 33050147 | 33050347 |
| 17 | 33061633 | 33084307 - | NM_130882    | Cyp4f13 | 1990  | 33082117 | 33082317 |
| 17 | 33061633 | 33084307 - | NM_130882    | Cyp4f13 | 22240 | 33061867 | 33062067 |
| 17 | 33061633 | 33084307 - | NM_130882    | Cyp4f13 | 3782  | 33080325 | 33080525 |
| 17 | 33153809 | 33170327 - | NM_028543    | Zfp763  | 0     | 33170309 | 33170509 |
| 17 | 33226312 | 33247650 + | NM_001024950 | Zfp563  | 9531  | 33235843 | 33236043 |
| 17 | 33766037 | 33768660 + | NM_026712    | Zfp414  | 368   | 33766405 | 33766605 |
| 17 | 33766037 | 33768660 + | NR_034153    | Zfp414  | 368   | 33766405 | 33766605 |
| 17 | 33775001 | 33782652 + | NM_001002842 | Pram1   | -8396 | 33766405 | 33766605 |
| 17 | 33775040 | 33782652 + | NR_028279    | Pram1   | -8435 | 33766405 | 33766605 |
| 17 | 33879429 | 33897432 - | NM_008997    | Rab11b  | 13960 | 33883272 | 33883472 |
| 17 | 33911845 | 33918521 - | NM_020581    | Angptl4 | -7227 | 33925748 | 33925948 |
| 17 | 33947468 | 33959860 + | NM_030697    | Kank3   | 499   | 33947967 | 33948167 |



|    |          |            |              |          |       |          |          |
|----|----------|------------|--------------|----------|-------|----------|----------|
| 17 | 33959982 | 33961444 - | NM_016844    | Rps28    | -2344 | 33963788 | 33963988 |
| 17 | 33961517 | 33975262 + | NM_023202    | Ndufa7   | 10650 | 33972167 | 33972367 |
| 17 | 33961517 | 33975262 + | NM_023202    | Ndufa7   | 2271  | 33963788 | 33963988 |
| 17 | 33961517 | 33963133 + | NR_103515    | Ndufa7   | 2271  | 33963788 | 33963988 |
| 17 | 33961517 | 33975262 + | NR_103516    | Ndufa7   | 10650 | 33972167 | 33972367 |
| 17 | 33961517 | 33975262 + | NR_103516    | Ndufa7   | 2271  | 33963788 | 33963988 |
| 17 | 33961590 | 33963133 + | NR_103514    | Ndufa7   | 2198  | 33963788 | 33963988 |
| 17 | 33980036 | 33986720 + | NM_019421    | Cd320    | -7669 | 33972167 | 33972367 |
| 17 | 33980371 | 33986720 + | NM_001305169 | Cd320    | -8004 | 33972167 | 33972367 |
| 17 | 34056423 | 34066236 + | NM_001025313 | Tapbp    | 2015  | 34058438 | 34058638 |
| 17 | 34056423 | 34066236 + | NM_009318    | Tapbp    | 2015  | 34058438 | 34058638 |
| 17 | 34066839 | 34074633 + | NM_009059    | Rgl2     | -8201 | 34058438 | 34058638 |
| 17 | 34075854 | 34077276 - | NM_001185182 | Pfdn6    | -8796 | 34086072 | 34086272 |
| 17 | 34075854 | 34077289 - | NM_010385    | Pfdn6    | -8783 | 34086072 | 34086272 |
| 17 | 34077668 | 34086641 + | NM_020603    | Wdr46    | 8404  | 34086072 | 34086272 |
| 17 | 34086857 | 34088434 - | NM_019420    | B3galt4  | 2162  | 34086072 | 34086272 |
| 17 | 34092827 | 34103434 + | NM_172620    | Vps52    | -6555 | 34086072 | 34086272 |
| 17 | 34220788 | 34232255 - | NR_046183    | BC051537 | -1007 | 34233262 | 34233462 |
| 17 | 34419696 | 34424717 - | NM_010378    | H2-Aa    | -7991 | 34432708 | 34432908 |
| 17 | 34442812 | 34453620 + | NM_010382    | H2-Eb1   | -9904 | 34432708 | 34432908 |
| 17 | 34442812 | 34453620 + | NM_010382    | H2-Eb1   | -4720 | 34437892 | 34438092 |
| 17 | 34479157 | 34481591 - | NM_010381    | H2-Ea-ps | -9973 | 34491564 | 34491764 |
| 17 | 34491767 | 34506438 + | NM_079835    | Btnl2    | -3    | 34491564 | 34491764 |
| 17 | 34514077 | 34522974 + | NM_001111094 | Btnl1    | -6204 | 34507673 | 34507873 |
| 17 | 34535765 | 34597680 + | NM_001001177 | BC051142 | -624  | 34534941 | 34535141 |
| 17 | 34535765 | 34597680 + | NM_001163855 | BC051142 | -624  | 34534941 | 34535141 |
| 17 | 34605987 | 34612883 - | NM_030746    | Btnl4    | -1219 | 34614102 | 34614302 |
| 17 | 34624351 | 34634375 - | NR_004051    | Btnl5-ps | 2062  | 34632113 | 34632313 |
| 17 | 34624351 | 34634375 - | NR_004051    | Btnl5-ps | 9779  | 34624396 | 34624596 |
| 17 | 34644880 | 34654298 - | NM_030747    | Btnl6    | -1789 | 34656087 | 34656287 |

|    |          |            |              |         |       |          |          |
|----|----------|------------|--------------|---------|-------|----------|----------|
| 17 | 34644880 | 34654298 - | NM_030747    | Btnl6   | 541   | 34653557 | 34653757 |
| 17 | 34738044 | 34740507 - | NM_019403    | Rnf5    | -1194 | 34741701 | 34741901 |
| 17 | 34742806 | 34750395 + | NM_001163379 | Agpat1  | -905  | 34741701 | 34741901 |
| 17 | 34745959 | 34750395 + | NM_018862    | Agpat1  | -4058 | 34741701 | 34741901 |
| 17 | 34976171 | 34987150 - | NM_021337    | Skiv2l  | -5599 | 34992749 | 34992949 |
| 17 | 34987336 | 34993318 + | NM_001045863 | Nelfe   | 5413  | 34992749 | 34992949 |
| 17 | 34987336 | 34993318 + | NM_001045864 | Nelfe   | 5413  | 34992749 | 34992949 |
| 17 | 34987336 | 34993318 + | NM_138580    | Nelfe   | 5413  | 34992749 | 34992949 |
| 17 | 34993319 | 34999460 - | NM_001142706 | Cfb     | 235   | 34999025 | 34999225 |
| 17 | 34993319 | 34999460 - | NM_008198    | Cfb     | 235   | 34999025 | 34999225 |
| 17 | 34994514 | 34994578 - | NR_105938    | Mir6972 | -4447 | 34999025 | 34999225 |
| 17 | 34994514 | 34994578 - | NR_105938    | Mir6972 | 1629  | 34992749 | 34992949 |
| 17 | 35068198 | 35074243 + | NM_010893    | Neu1    | -187  | 35067811 | 35068011 |
| 17 | 35153524 | 35163687 + | NM_138582    | Vwa7    | 5427  | 35158951 | 35159151 |
| 17 | 35165550 | 35183691 - | NM_001146215 | Msh5    | -1490 | 35185181 | 35185381 |
| 17 | 35165550 | 35183691 - | NM_001146215 | Msh5    | -3009 | 35186700 | 35186900 |
| 17 | 35165550 | 35183568 - | NM_013600    | Msh5    | -1613 | 35185181 | 35185381 |
| 17 | 35165550 | 35183568 - | NM_013600    | Msh5    | -3132 | 35186700 | 35186900 |
| 17 | 35165550 | 35183568 - | NR_130640    | Msh5    | -1613 | 35185181 | 35185381 |
| 17 | 35165550 | 35183568 - | NR_130640    | Msh5    | -3132 | 35186700 | 35186900 |
| 17 | 35165550 | 35183568 - | NR_130641    | Msh5    | -1613 | 35185181 | 35185381 |
| 17 | 35165550 | 35183568 - | NR_130641    | Msh5    | -3132 | 35186700 | 35186900 |
| 17 | 35187188 | 35195665 + | NM_033444    | Clic1   | -1807 | 35185181 | 35185381 |
| 17 | 35187188 | 35195665 + | NM_033444    | Clic1   | -288  | 35186700 | 35186900 |
| 17 | 35195980 | 35199045 + | NM_001190449 | Ddah2   | -9080 | 35186700 | 35186900 |
| 17 | 35195980 | 35199045 + | NM_016765    | Ddah2   | -9080 | 35186700 | 35186900 |
| 17 | 35199638 | 35203130 - | NM_001033221 | G6b     | -2051 | 35205181 | 35205381 |
| 17 | 35199638 | 35203130 - | NM_001191012 | G6b     | -2051 | 35205181 | 35205381 |
| 17 | 35204270 | 35206994 + | NM_023463    | Ly6g6c  | 911   | 35205181 | 35205381 |
| 17 | 35208293 | 35211410 - | NM_033478    | Ly6g6d  | -9535 | 35220945 | 35221145 |

|    |          |            |              |           |       |          |          |
|----|----------|------------|--------------|-----------|-------|----------|----------|
| 17 | 35208293 | 35211410 - | NM_033478    | Ly6g6d    | -5391 | 35216801 | 35217001 |
| 17 | 35213887 | 35215750 + | NM_027366    | Ly6g6e    | -8506 | 35205181 | 35205381 |
| 17 | 35213887 | 35215750 + | NM_027366    | Ly6g6e    | 2914  | 35216801 | 35217001 |
| 17 | 35217483 | 35222541 - | NM_001163192 | Ly6g6f    | 1396  | 35220945 | 35221145 |
| 17 | 35226236 | 35239933 + | NM_178592    | Abhd16a   | -5091 | 35220945 | 35221145 |
| 17 | 35226236 | 35239933 + | NM_178592    | Abhd16a   | 11029 | 35237265 | 35237465 |
| 17 | 35226236 | 35239933 + | NM_178592    | Abhd16a   | -9235 | 35216801 | 35217001 |
| 17 | 35245245 | 35248899 + | NM_148947    | Ly6g5c    | -4842 | 35240203 | 35240403 |
| 17 | 35245245 | 35248899 + | NM_148947    | Ly6g5c    | -7780 | 35237265 | 35237465 |
| 17 | 35286031 | 35301823 - | NM_001199044 | Prrc2a    | -9735 | 35311558 | 35311758 |
| 17 | 35286031 | 35301823 - | NM_020027    | Prrc2a    | -9735 | 35311558 | 35311758 |
| 17 | 35307937 | 35312947 - | NM_019467    | Aif1      | 1189  | 35311558 | 35311758 |
| 17 | 35322040 | 35325386 - | NM_010734    | Lst1      | -8366 | 35333752 | 35333952 |
| 17 | 35331452 | 35333251 + | NM_008518    | Ltb       | 2300  | 35333752 | 35333952 |
| 17 | 35331917 | 35331995 + | NR_105939    | Mir6973a  | 1835  | 35333752 | 35333952 |
| 17 | 35336312 | 35338953 - | NM_001278601 | Tnf       | 465   | 35338288 | 35338488 |
| 17 | 35336312 | 35338953 - | NM_013693    | Tnf       | 465   | 35338288 | 35338488 |
| 17 | 35357120 | 35372761 - | NM_010909    | Nfkbil1   | -6794 | 35379555 | 35379755 |
| 17 | 35357120 | 35372761 - | NM_010909    | Nfkbil1   | 3612  | 35368949 | 35369149 |
| 17 | 35373541 | 35375713 + | NM_023179    | Atp6v1g2  | -4392 | 35368949 | 35369149 |
| 17 | 35378691 | 35390653 + | NM_019693    | Ddx39b    | 864   | 35379555 | 35379755 |
| 17 | 35378691 | 35390653 + | NM_019693    | Ddx39b    | -9542 | 35368949 | 35369149 |
| 17 | 35379762 | 35390653 + | NM_001252457 | Ddx39b    | -7    | 35379555 | 35379755 |
| 17 | 35381020 | 35381081 + | NR_105941    | Mir6975   | -1265 | 35379555 | 35379755 |
| 17 | 35388234 | 35388351 + | NR_106169    | Mir8094   | -8479 | 35379555 | 35379755 |
| 17 | 35402724 | 35462355 + | NM_001025208 | LOC547349 | 54527 | 35457251 | 35457451 |
| 17 | 35457503 | 35462045 + | NM_010390    | H2-Q1     | -52   | 35457251 | 35457451 |
| 17 | 35479278 | 35482668 + | NM_010392    | H2-Q2     | -40   | 35479038 | 35479238 |
| 17 | 35479278 | 35482668 + | NM_010392    | H2-Q2     | 814   | 35480092 | 35480292 |
| 17 | 35576100 | 35580719 + | NM_001198560 | H2-Q7     | -38   | 35575862 | 35576062 |

|    |          |            |              |               |       |          |          |
|----|----------|------------|--------------|---------------|-------|----------|----------|
| 17 | 35576100 | 35580719 + | NM_001198561 | H2-Q7         | -38   | 35575862 | 35576062 |
| 17 | 35576100 | 35580719 + | NM_010394    | H2-Q7         | -38   | 35575862 | 35576062 |
| 17 | 35576112 | 35580716 + | NM_001201460 | H2-Q9         | -50   | 35575862 | 35576062 |
| 17 | 36034541 | 36047014 - | NM_001142744 | Atat1         | 588   | 36046226 | 36046426 |
| 17 | 36036774 | 36047014 - | NM_001142745 | Atat1         | 588   | 36046226 | 36046426 |
| 17 | 36036774 | 36047014 - | NM_028476    | Atat1         | 588   | 36046226 | 36046426 |
| 17 | 36054141 | 36069229 + | NM_001163818 | Ppp1r10       | -7715 | 36046226 | 36046426 |
| 17 | 36054834 | 36054915 + | NR_035445    | Mir1894       | -8408 | 36046226 | 36046426 |
| 17 | 36131449 | 36175120 + | NR_015618    | A930015D03Rik | 29353 | 36160802 | 36161002 |
| 17 | 36142640 | 36157506 - | NM_008207    | H2-T24        | -3296 | 36160802 | 36161002 |
| 17 | 36179906 | 36195591 + | NM_001034909 | Gm6034        | 15605 | 36195511 | 36195711 |
| 17 | 36192761 | 36195317 - | NM_001199967 | Gm11127       | -194  | 36195511 | 36195711 |
| 17 | 36217134 | 36221195 - | NM_008199    | H2-BI         | -11   | 36221206 | 36221406 |
| 17 | 36322516 | 36327097 - | NM_008208    | H2-T3         | -140  | 36327237 | 36327437 |
| 17 | 36974091 | 36996344 + | NM_001025599 | Trim26        | 14557 | 36988648 | 36988848 |
| 17 | 36974091 | 36996344 + | NM_001286726 | Trim26        | 14557 | 36988648 | 36988848 |
| 17 | 36974091 | 36996344 + | NM_001286727 | Trim26        | 14557 | 36988648 | 36988848 |
| 17 | 37018543 | 37027071 - | NM_001033235 | Trim40        | -3974 | 37031045 | 37031245 |
| 17 | 37018543 | 37027071 - | NM_001033235 | Trim40        | -4762 | 37031833 | 37032033 |
| 17 | 37018543 | 37027071 - | NM_001172168 | Trim40        | -3974 | 37031045 | 37031245 |
| 17 | 37018543 | 37027071 - | NM_001172168 | Trim40        | -4762 | 37031833 | 37032033 |
| 17 | 37035075 | 37047163 + | NM_146077    | Trim31        | -3830 | 37031045 | 37031245 |
| 17 | 37035075 | 37047163 + | NM_146077    | Trim31        | -3042 | 37031833 | 37032033 |
| 17 | 37399678 | 37400608 - | NM_146510    | Olf98         | -6526 | 37407134 | 37407334 |
| 17 | 37407179 | 37411431 + | NM_013819    | H2-M3         | 0     | 37407134 | 37407334 |
| 17 | 37746730 | 37747725 - | NM_001011753 | Olf115        | -6542 | 37754267 | 37754467 |
| 17 | 39979942 | 39985775 + | NR_046233    | Rn45s         | 1370  | 39981312 | 39981512 |
| 17 | 39979942 | 39985775 + | NR_046233    | Rn45s         | 4636  | 39984578 | 39984778 |
| 17 | 39979942 | 39985775 + | NR_046233    | Rn45s         | 2082  | 39982024 | 39982224 |
| 17 | 39979942 | 39985775 + | NR_046233    | Rn45s         | 0     | 39979886 | 39980086 |

|    |          |            |              |               |       |          |          |
|----|----------|------------|--------------|---------------|-------|----------|----------|
| 17 | 41012431 | 41017508 - | NM_027834    | 9130008F23Rik | -4408 | 41021916 | 41022116 |
| 17 | 42929900 | 43013374 - | NM_009847    | Cd2ap         | -7477 | 43020851 | 43021051 |
| 17 | 42929900 | 43013374 - | NM_009847    | Cd2ap         | -8114 | 43021488 | 43021688 |
| 17 | 42929900 | 43013374 - | NM_009847    | Cd2ap         | -7019 | 43020393 | 43020593 |
| 17 | 42929900 | 43013374 - | NM_009847    | Cd2ap         | 4531  | 43008643 | 43008843 |
| 17 | 43153504 | 43226138 + | NM_178589    | Tnfrsf21      | 1402  | 43154906 | 43155106 |
| 17 | 43282990 | 43295241 - | NR_045155    | E130008D07Rik | 4401  | 43290640 | 43290840 |
| 17 | 43286306 | 43295241 - | NR_045153    | E130008D07Rik | 4401  | 43290640 | 43290840 |
| 17 | 43286306 | 43295241 - | NR_045154    | E130008D07Rik | 4401  | 43290640 | 43290840 |
| 17 | 43526415 | 43596507 + | NM_001081178 | Adgrf5        | 61897 | 43588312 | 43588512 |
| 17 | 43611278 | 43639723 - | NM_008585    | Mep1a         | 14040 | 43625483 | 43625683 |
| 17 | 43611278 | 43639723 - | NM_008585    | Mep1a         | -966  | 43640689 | 43640889 |
| 17 | 43705400 | 43749151 + | NM_013737    | Pla2g7        | -1840 | 43703360 | 43703560 |
| 17 | 43804321 | 43888381 + | NM_001285947 | Cyp39a1       | 55919 | 43860240 | 43860440 |
| 17 | 43804321 | 43888381 + | NM_001285948 | Cyp39a1       | 55919 | 43860240 | 43860440 |
| 17 | 43804321 | 43888381 + | NM_018887    | Cyp39a1       | 55919 | 43860240 | 43860440 |
| 17 | 44325521 | 44417118 + | NM_172621    | Clic5         | 14520 | 44340041 | 44340241 |
| 17 | 44325521 | 44417118 + | NM_172621    | Clic5         | 84022 | 44409543 | 44409743 |
| 17 | 44325521 | 44417118 + | NM_172621    | Clic5         | 4415  | 44329936 | 44330136 |
| 17 | 46308942 | 46339575 - | NM_030715    | Polh          | 8415  | 46330960 | 46331160 |
| 17 | 46339804 | 46379249 + | NM_028198    | Xpo5          | -8644 | 46330960 | 46331160 |
| 17 | 46394800 | 46419976 - | NM_001252473 | Tjap1         | 14793 | 46404983 | 46405183 |
| 17 | 46394800 | 46419976 - | NM_001252474 | Tjap1         | 14793 | 46404983 | 46405183 |
| 17 | 46394800 | 46419976 - | NM_001252475 | Tjap1         | 14793 | 46404983 | 46405183 |
| 17 | 46394800 | 46419976 - | NM_028751    | Tjap1         | 14793 | 46404983 | 46405183 |
| 17 | 46434432 | 46440221 + | NM_001286028 | Dlk2          | 917   | 46435349 | 46435549 |
| 17 | 46434877 | 46440221 + | NM_001286013 | Dlk2          | 472   | 46435349 | 46435549 |
| 17 | 46579397 | 46624625 - | NM_001162864 | Ttbk1         | 29484 | 46594941 | 46595141 |
| 17 | 46701400 | 46766454 - | NM_175168    | Ptk7          | 32102 | 46734152 | 46734352 |
| 17 | 46819940 | 46841952 - | NM_009358    | Ppp2r5d       | 5424  | 46836328 | 46836528 |

|    |          |            |              |               |       |          |          |
|----|----------|------------|--------------|---------------|-------|----------|----------|
| 17 | 47027570 | 47029413 + | NM_178385    | Tbcc          | -4468 | 47022902 | 47023102 |
| 17 | 47065240 | 47147482 - | NM_001177374 | Ubr2          | 6806  | 47140476 | 47140676 |
| 17 | 47065240 | 47147482 - | NM_001177374 | Ubr2          | -797  | 47148279 | 47148479 |
| 17 | 47065240 | 47147482 - | NM_146078    | Ubr2          | 6806  | 47140476 | 47140676 |
| 17 | 47065240 | 47147482 - | NM_146078    | Ubr2          | -797  | 47148279 | 47148479 |
| 17 | 47277891 | 47496408 + | NM_001097623 | Trerf1        | -2496 | 47275195 | 47275395 |
| 17 | 47549683 | 47551661 - | NM_001172091 | 1700001C19Rik | -9570 | 47561231 | 47561431 |
| 17 | 47549683 | 47574325 - | NM_029296    | 1700001C19Rik | -8268 | 47582593 | 47582793 |
| 17 | 47549683 | 47574325 - | NM_029296    | 1700001C19Rik | 12894 | 47561231 | 47561431 |
| 17 | 47549683 | 47574325 - | NM_029296    | 1700001C19Rik | -74   | 47574399 | 47574599 |
| 17 | 47573588 | 47607588 + | NM_145489    | AI661453      | 9005  | 47582593 | 47582793 |
| 17 | 47573588 | 47607588 + | NM_145489    | AI661453      | 28696 | 47602284 | 47602484 |
| 17 | 47573588 | 47607588 + | NM_145489    | AI661453      | 22876 | 47596464 | 47596664 |
| 17 | 47573588 | 47607588 + | NM_145489    | AI661453      | 12960 | 47586548 | 47586748 |
| 17 | 47573588 | 47607588 + | NM_145489    | AI661453      | 811   | 47574399 | 47574599 |
| 17 | 47767639 | 47821017 + | NM_198421    | Usp49         | 3797  | 47771436 | 47771636 |
| 17 | 48386896 | 48398214 + | NM_021407    | Trem3         | 9530  | 48396426 | 48396626 |
| 17 | 48403661 | 48414725 + | NM_001033922 | TremI4        | -7035 | 48396426 | 48396626 |
| 17 | 48403661 | 48414725 + | NM_001033922 | TremI4        | 7996  | 48411657 | 48411857 |
| 17 | 48403661 | 48414725 + | NM_001163795 | TremI4        | -7035 | 48396426 | 48396626 |
| 17 | 48403661 | 48414725 + | NM_001163795 | TremI4        | 7996  | 48411657 | 48411857 |
| 17 | 48403661 | 48414725 + | NM_001163796 | TremI4        | -7035 | 48396426 | 48396626 |
| 17 | 48403661 | 48414725 + | NM_001163796 | TremI4        | 7996  | 48411657 | 48411857 |
| 17 | 48403661 | 48414725 + | NM_172623    | TremI4        | -7035 | 48396426 | 48396626 |
| 17 | 48403661 | 48414725 + | NM_172623    | TremI4        | 7996  | 48411657 | 48411857 |
| 17 | 48526210 | 48549146 - | NM_001110832 | Nfya          | -8424 | 48557570 | 48557770 |
| 17 | 48526210 | 48549146 - | NM_010913    | Nfya          | -8424 | 48557570 | 48557770 |
| 17 | 48558556 | 48572054 - | NM_009694    | Apobec2       | -3791 | 48575845 | 48576045 |
| 17 | 48558556 | 48572054 - | NM_009694    | Apobec2       | -5289 | 48577343 | 48577543 |
| 17 | 48558556 | 48572054 - | NM_009694    | Apobec2       | 6638  | 48565216 | 48565416 |

|    |          |            |              |         |        |          |          |
|----|----------|------------|--------------|---------|--------|----------|----------|
| 17 | 48558556 | 48572054 - | NM_009694    | Apobec2 | -1132  | 48573186 | 48573386 |
| 17 | 48587760 | 48590827 - | NM_027292    | Tspo2   | -5489  | 48596316 | 48596516 |
| 17 | 48594226 | 48608010 + | NM_152823    | Unc5cl  | 2090   | 48596316 | 48596516 |
| 17 | 49071907 | 49236916 + | NM_027452    | Lrfn2   | 4259   | 49076166 | 49076366 |
| 17 | 49567689 | 49594756 + | NM_020042    | Mocs1   | 10601  | 49578290 | 49578490 |
| 17 | 49567689 | 49594756 + | NM_020042    | Mocs1   | 631    | 49568320 | 49568520 |
| 17 | 49567689 | 49594756 + | NM_028464    | Mocs1   | 10601  | 49578290 | 49578490 |
| 17 | 49567689 | 49594756 + | NM_028464    | Mocs1   | 631    | 49568320 | 49568520 |
| 17 | 50648872 | 50827820 + | NM_013880    | Plcl2   | 5968   | 50654840 | 50655040 |
| 17 | 50648872 | 50827820 + | NM_013880    | Plcl2   | 125526 | 50774398 | 50774598 |
| 17 | 50648872 | 50827820 + | NM_013880    | Plcl2   | 4469   | 50653341 | 50653541 |
| 17 | 50872452 | 51318678 - | NM_001285991 | Tbc1d5  | 401681 | 50916797 | 50916997 |
| 17 | 50872452 | 51318678 - | NM_001285991 | Tbc1d5  | 263841 | 51054637 | 51054837 |
| 17 | 50872452 | 51318678 - | NM_001285991 | Tbc1d5  | 58297  | 51260181 | 51260381 |
| 17 | 50872452 | 51318678 - | NM_001285991 | Tbc1d5  | 274559 | 51043919 | 51044119 |
| 17 | 50872452 | 51318678 - | NM_001285991 | Tbc1d5  | 280143 | 51038335 | 51038535 |
| 17 | 50872452 | 51298704 - | NM_001285993 | Tbc1d5  | 381707 | 50916797 | 50916997 |
| 17 | 50872452 | 51298704 - | NM_001285993 | Tbc1d5  | 243867 | 51054637 | 51054837 |
| 17 | 50872452 | 51298704 - | NM_001285993 | Tbc1d5  | 38323  | 51260181 | 51260381 |
| 17 | 50872452 | 51298704 - | NM_001285993 | Tbc1d5  | 254585 | 51043919 | 51044119 |
| 17 | 50872452 | 51298704 - | NM_001285993 | Tbc1d5  | 260169 | 51038335 | 51038535 |
| 17 | 50872452 | 51318678 - | NM_028162    | Tbc1d5  | 401681 | 50916797 | 50916997 |
| 17 | 50872452 | 51318678 - | NM_028162    | Tbc1d5  | 263841 | 51054637 | 51054837 |
| 17 | 50872452 | 51318678 - | NM_028162    | Tbc1d5  | 58297  | 51260181 | 51260381 |
| 17 | 50872452 | 51318678 - | NM_028162    | Tbc1d5  | 274559 | 51043919 | 51044119 |
| 17 | 50872452 | 51318678 - | NM_028162    | Tbc1d5  | 280143 | 51038335 | 51038535 |
| 17 | 53618559 | 53647004 + | NM_025887    | Rab5a   | -784   | 53617575 | 53617775 |
| 17 | 53618559 | 53647004 + | NM_025887    | Rab5a   | -217   | 53618142 | 53618342 |
| 17 | 53706296 | 53812047 + | NM_020005    | Kat2b   | 3480   | 53709776 | 53709976 |
| 17 | 56077796 | 56088924 - | NM_001310337 | Zfp119b | -6853  | 56095777 | 56095977 |

|    |          |            |              |           |       |          |          |
|----|----------|------------|--------------|-----------|-------|----------|----------|
| 17 | 56092046 | 56096446 + | NM_015766    | Ebi3      | 3731  | 56095777 | 56095977 |
| 17 | 56094194 | 56098825 - | NR_108021    | Gm16712   | 2848  | 56095777 | 56095977 |
| 17 | 56098610 | 56107375 + | NM_028381    | Ccdc94    | -2633 | 56095777 | 56095977 |
| 17 | 56136499 | 56145030 - | NM_145934    | Stap2     | -503  | 56145533 | 56145733 |
| 17 | 56136499 | 56145030 - | NM_145934    | Stap2     | -2706 | 56147736 | 56147936 |
| 17 | 56136499 | 56145030 - | NM_145934    | Stap2     | -1944 | 56146974 | 56147174 |
| 17 | 56136499 | 56145030 - | NR_102313    | Stap2     | -503  | 56145533 | 56145733 |
| 17 | 56136499 | 56145030 - | NR_102313    | Stap2     | -2706 | 56147736 | 56147936 |
| 17 | 56136499 | 56145030 - | NR_102313    | Stap2     | -1944 | 56146974 | 56147174 |
| 17 | 56148624 | 56156207 + | NM_026530    | Mpnd      | -2891 | 56145533 | 56145733 |
| 17 | 56148624 | 56156207 + | NM_026530    | Mpnd      | -688  | 56147736 | 56147936 |
| 17 | 56148624 | 56156207 + | NM_026530    | Mpnd      | -1450 | 56146974 | 56147174 |
| 17 | 56179839 | 56207450 + | NM_013733    | Chaf1a    | 10846 | 56190685 | 56190885 |
| 17 | 56240014 | 56249226 - | NM_020568    | Plin4     | -1976 | 56251202 | 56251402 |
| 17 | 56251024 | 56256722 - | NM_001077348 | Plin5     | 5320  | 56251202 | 56251402 |
| 17 | 56251024 | 56256972 - | NM_025874    | Plin5     | 5570  | 56251202 | 56251402 |
| 17 | 56301914 | 56313379 + | NM_025566    | Tnfaip8l1 | -8452 | 56293262 | 56293462 |
| 17 | 56326105 | 56358313 - | NM_172624    | Dpp9      | 18697 | 56339416 | 56339616 |
| 17 | 56408885 | 56416191 - | NM_174989    | Ticam1    | -580  | 56416771 | 56416971 |
| 17 | 56408885 | 56416191 - | NM_174989    | Ticam1    | -1426 | 56417617 | 56417817 |
| 17 | 56408885 | 56416191 - | NM_174989    | Ticam1    | 0     | 56416169 | 56416369 |
| 17 | 56418385 | 56429935 - | NM_025836    | Plin3     | 922   | 56428813 | 56429013 |
| 17 | 56812648 | 56851193 + | NM_001252466 | Ranbp3    | 11066 | 56823714 | 56823914 |
| 17 | 56812648 | 56851193 + | NM_001252467 | Ranbp3    | 11066 | 56823714 | 56823914 |
| 17 | 56812648 | 56851193 + | NM_027933    | Ranbp3    | 11066 | 56823714 | 56823914 |
| 17 | 56812648 | 56851193 + | NR_045519    | Ranbp3    | 11066 | 56823714 | 56823914 |
| 17 | 56890748 | 56896954 - | NM_008738    | Nrtn      | -5776 | 56902730 | 56902930 |
| 17 | 56890748 | 56896954 - | NM_008738    | Nrtn      | -3882 | 56900836 | 56901036 |
| 17 | 56904174 | 56909517 + | NM_144858    | Dus3l     | -1244 | 56902730 | 56902930 |
| 17 | 56904174 | 56909517 + | NM_144858    | Dus3l     | -3138 | 56900836 | 56901036 |



|    |          |            |              |          |        |          |          |
|----|----------|------------|--------------|----------|--------|----------|----------|
| 17 | 56909699 | 56911558 + | NM_001195673 | Prr22    | -6769  | 56902730 | 56902930 |
| 17 | 56909699 | 56911558 + | NM_001195673 | Prr22    | -8663  | 56900836 | 56901036 |
| 17 | 57092913 | 57121550 - | NM_175731    | Acer1    | -211   | 57121761 | 57121961 |
| 17 | 57092913 | 57121550 - | NM_175731    | Acer1    | 18261  | 57103089 | 57103289 |
| 17 | 57092913 | 57121550 - | NM_175731    | Acer1    | 11137  | 57110213 | 57110413 |
| 17 | 57092913 | 57121550 - | NM_175731    | Acer1    | 5480   | 57115870 | 57116070 |
| 17 | 57092913 | 57121550 - | NM_175731    | Acer1    | 12423  | 57108927 | 57109127 |
| 17 | 57129687 | 57135795 + | NM_017393    | Clpp     | -7726  | 57121761 | 57121961 |
| 17 | 57183134 | 57199287 - | NM_025877    | Slc25a23 | -603   | 57199890 | 57200090 |
| 17 | 57201700 | 57205338 + | NM_177638    | Crb3     | -1610  | 57199890 | 57200090 |
| 17 | 57374338 | 57387113 - | NM_001308072 | Gpr108   | 0      | 57386971 | 57387171 |
| 17 | 57374338 | 57386894 - | NM_001308074 | Gpr108   | -77    | 57386971 | 57387171 |
| 17 | 57374338 | 57387113 - | NM_030084    | Gpr108   | 0      | 57386971 | 57387171 |
| 17 | 57388874 | 57403121 + | NM_001242389 | Trip10   | -1703  | 57386971 | 57387171 |
| 17 | 57388874 | 57403121 + | NM_001242390 | Trip10   | -1703  | 57386971 | 57387171 |
| 17 | 57388874 | 57403121 + | NM_001242391 | Trip10   | -1703  | 57386971 | 57387171 |
| 17 | 57388874 | 57403121 + | NM_134125    | Trip10   | -1703  | 57386971 | 57387171 |
| 17 | 57418523 | 57468660 + | NM_001163815 | Vav1     | 28017  | 57446540 | 57446740 |
| 17 | 57418523 | 57468660 + | NM_001163816 | Vav1     | 28017  | 57446540 | 57446740 |
| 17 | 57418523 | 57468660 + | NM_011691    | Vav1     | 28017  | 57446540 | 57446740 |
| 17 | 63395301 | 63849930 - | NM_015794    | Fbxl17   | 21051  | 63828679 | 63828879 |
| 17 | 63395301 | 63849930 - | NM_015794    | Fbxl17   | 320288 | 63529442 | 63529642 |
| 17 | 63395301 | 63849930 - | NM_015794    | Fbxl17   | 135541 | 63714189 | 63714389 |
| 17 | 63395301 | 63849930 - | NM_015794    | Fbxl17   | 88732  | 63760998 | 63761198 |
| 17 | 63395301 | 63849930 - | NM_015794    | Fbxl17   | 141468 | 63708262 | 63708462 |
| 17 | 63395301 | 63849930 - | NM_015794    | Fbxl17   | 159026 | 63690704 | 63690904 |
| 17 | 64950989 | 65104451 + | NM_008549    | Man2a1   | -1522  | 64949267 | 64949467 |
| 17 | 65116451 | 65117272 + | NR_105051    | Dreh     | -520   | 65115731 | 65115931 |
| 17 | 65929393 | 65962896 - | NM_013933    | Vapa     | 2247   | 65960449 | 65960649 |
| 17 | 65929393 | 65962896 - | NM_013933    | Vapa     | 26573  | 65936123 | 65936323 |

|    |          |            |              |               |        |          |          |
|----|----------|------------|--------------|---------------|--------|----------|----------|
| 17 | 66001066 | 66122093 - | NM_133685    | Rab31         | -836   | 66122929 | 66123129 |
| 17 | 66001066 | 66122093 - | NM_133685    | Rab31         | 71620  | 66050273 | 66050473 |
| 17 | 66001066 | 66122093 - | NM_133685    | Rab31         | 103212 | 66018681 | 66018881 |
| 17 | 66132695 | 66191267 + | NM_001114131 | Ppp4r1        | -9566  | 66122929 | 66123129 |
| 17 | 66132695 | 66191267 + | NM_146081    | Ppp4r1        | -9566  | 66122929 | 66123129 |
| 17 | 66132695 | 66191267 + | NR_104465    | Ppp4r1        | -9566  | 66122929 | 66123129 |
| 17 | 66428135 | 66450900 - | NM_001278415 | Ndufv2        | -5659  | 66456559 | 66456759 |
| 17 | 66428135 | 66450900 - | NM_028388    | Ndufv2        | -5659  | 66456559 | 66456759 |
| 17 | 66460886 | 66469844 + | NM_026833    | Wash1         | -4127  | 66456559 | 66456759 |
| 17 | 66460985 | 66469844 + | NM_001037757 | Wash1         | -4226  | 66456559 | 66456759 |
| 17 | 66843852 | 66869011 - | NM_024448    | Rab12         | -336   | 66869347 | 66869547 |
| 17 | 66904592 | 66943963 - | NM_028998    | Themis3       | 1272   | 66942491 | 66942691 |
| 17 | 66904592 | 66943963 - | NM_028998    | Themis3       | 4164   | 66939599 | 66939799 |
| 17 | 69506150 | 69639328 + | NM_013813    | Epb4.1l3      | 125128 | 69631278 | 69631478 |
| 17 | 69506150 | 69639328 + | NM_013813    | Epb4.1l3      | 48902  | 69555052 | 69555252 |
| 17 | 69506150 | 69639328 + | NM_013813    | Epb4.1l3      | 49760  | 69555910 | 69556110 |
| 17 | 69624702 | 69626547 - | NR_045428    | 2410021H03Rik | -4731  | 69631278 | 69631478 |
| 17 | 70774132 | 71166070 + | NM_027712    | Dlgap1        | 330866 | 71104998 | 71105198 |
| 17 | 70774132 | 71166070 + | NM_027712    | Dlgap1        | 260255 | 71034387 | 71034587 |
| 17 | 70774132 | 71166070 + | NM_027712    | Dlgap1        | 323557 | 71097689 | 71097889 |
| 17 | 70774132 | 71166070 + | NM_027712    | Dlgap1        | 246271 | 71020403 | 71020603 |
| 17 | 70774132 | 71166070 + | NM_027712    | Dlgap1        | 195600 | 70969732 | 70969932 |
| 17 | 70774132 | 71170754 + | NM_177639    | Dlgap1        | 330866 | 71104998 | 71105198 |
| 17 | 70774132 | 71170754 + | NM_177639    | Dlgap1        | 260255 | 71034387 | 71034587 |
| 17 | 70774132 | 71170754 + | NM_177639    | Dlgap1        | 323557 | 71097689 | 71097889 |
| 17 | 70774132 | 71170754 + | NM_177639    | Dlgap1        | 246271 | 71020403 | 71020603 |
| 17 | 70774132 | 71170754 + | NM_177639    | Dlgap1        | 195600 | 70969732 | 70969932 |
| 17 | 70871450 | 71170754 + | NM_001128180 | Dlgap1        | 233548 | 71104998 | 71105198 |
| 17 | 70871450 | 71170754 + | NM_001128180 | Dlgap1        | 162937 | 71034387 | 71034587 |
| 17 | 70871450 | 71170754 + | NM_001128180 | Dlgap1        | 226239 | 71097689 | 71097889 |

|    |          |            |              |         |        |          |          |
|----|----------|------------|--------------|---------|--------|----------|----------|
| 17 | 70871450 | 71170754 + | NM_001128180 | Dlgap1  | 148953 | 71020403 | 71020603 |
| 17 | 70871450 | 71170754 + | NM_001128180 | Dlgap1  | 98282  | 70969732 | 70969932 |
| 17 | 70911087 | 71166070 + | NM_001128181 | Dlgap1  | 193911 | 71104998 | 71105198 |
| 17 | 70911087 | 71166070 + | NM_001128181 | Dlgap1  | 123300 | 71034387 | 71034587 |
| 17 | 70911087 | 71166070 + | NM_001128181 | Dlgap1  | 186602 | 71097689 | 71097889 |
| 17 | 70911087 | 71166070 + | NM_001128181 | Dlgap1  | 109316 | 71020403 | 71020603 |
| 17 | 70911087 | 71166070 + | NM_001128181 | Dlgap1  | 58645  | 70969732 | 70969932 |
| 17 | 71323303 | 71339857 - | NM_023402    | Myl12b  | 1927   | 71337730 | 71337930 |
| 17 | 71323303 | 71339857 - | NM_023402    | Myl12b  | 4665   | 71334992 | 71335192 |
| 17 | 71368897 | 71476197 + | NM_001083934 | Myom1   | 68001  | 71436898 | 71437098 |
| 17 | 71368897 | 71476197 + | NM_001083934 | Myom1   | 80472  | 71449369 | 71449569 |
| 17 | 71368897 | 71476197 + | NM_010867    | Myom1   | 68001  | 71436898 | 71437098 |
| 17 | 71368897 | 71476197 + | NM_010867    | Myom1   | 80472  | 71449369 | 71449569 |
| 17 | 71533318 | 71599159 + | NM_022882    | Lpin2   | 21555  | 71554873 | 71555073 |
| 17 | 71533318 | 71599159 + | NM_022882    | Lpin2   | 20449  | 71553767 | 71553967 |
| 17 | 71553994 | 71599159 + | NM_001164885 | Lpin2   | 879    | 71554873 | 71555073 |
| 17 | 71553994 | 71599159 + | NM_001164885 | Lpin2   | -27    | 71553767 | 71553967 |
| 17 | 72022601 | 72079010 + | NM_177087    | Fam179a | 7819   | 72030420 | 72030620 |
| 17 | 73186044 | 73200536 + | NM_027166    | Ypel5   | -8204  | 73177640 | 73177840 |
| 17 | 73267645 | 73291287 + | NM_029999    | Lbh     | 15220  | 73282865 | 73283065 |
| 17 | 73457325 | 73592707 + | NM_001081071 | Lclat1  | 34537  | 73491862 | 73492062 |
| 17 | 73457325 | 73592707 + | NM_001081071 | Lclat1  | 78794  | 73536119 | 73536319 |
| 17 | 73457325 | 73592707 + | NM_001081071 | Lclat1  | 894    | 73458219 | 73458419 |
| 17 | 73457325 | 73592707 + | NM_001081071 | Lclat1  | 34030  | 73491355 | 73491555 |
| 17 | 73457325 | 73592707 + | NM_001177967 | Lclat1  | 34537  | 73491862 | 73492062 |
| 17 | 73457325 | 73592707 + | NM_001177967 | Lclat1  | 78794  | 73536119 | 73536319 |
| 17 | 73457325 | 73592707 + | NM_001177967 | Lclat1  | 894    | 73458219 | 73458419 |
| 17 | 73457325 | 73592707 + | NM_001177967 | Lclat1  | 34030  | 73491355 | 73491555 |
| 17 | 73457325 | 73592707 + | NM_001177968 | Lclat1  | 34537  | 73491862 | 73492062 |
| 17 | 73457325 | 73592707 + | NM_001177968 | Lclat1  | 78794  | 73536119 | 73536319 |

|    |          |            |              |         |        |          |          |
|----|----------|------------|--------------|---------|--------|----------|----------|
| 17 | 73457325 | 73592707 + | NM_001177968 | Lclat1  | 894    | 73458219 | 73458419 |
| 17 | 73457325 | 73592707 + | NM_001177968 | Lclat1  | 34030  | 73491355 | 73491555 |
| 17 | 73655804 | 73748637 - | NM_001033444 | Capn13  | 2302   | 73746135 | 73746335 |
| 17 | 73655804 | 73748637 - | NM_001033444 | Capn13  | 21279  | 73727158 | 73727358 |
| 17 | 73843091 | 74059792 - | NM_027864    | Galnt14 | 107030 | 73952562 | 73952762 |
| 17 | 73843091 | 74059792 - | NM_027864    | Galnt14 | 155612 | 73903980 | 73904180 |
| 17 | 74233235 | 74299537 - | NM_011723    | Xdh     | 4353   | 74294984 | 74295184 |
| 17 | 74233235 | 74299537 - | NM_011723    | Xdh     | 0      | 74299408 | 74299608 |
| 17 | 74233235 | 74299537 - | NM_011723    | Xdh     | 11007  | 74288330 | 74288530 |
| 17 | 74233235 | 74299537 - | NM_011723    | Xdh     | 7541   | 74291796 | 74291996 |
| 17 | 74233235 | 74299537 - | NM_011723    | Xdh     | 11310  | 74288027 | 74288227 |
| 17 | 74233235 | 74299537 - | NM_011723    | Xdh     | 46258  | 74253079 | 74253279 |
| 17 | 74825635 | 74858449 - | NM_001033367 | Nlrc4   | 2238   | 74856011 | 74856211 |
| 17 | 74825635 | 74858449 - | NM_001033367 | Nlrc4   | -4511  | 74862960 | 74863160 |
| 17 | 74825635 | 74858449 - | NM_001033367 | Nlrc4   | 584    | 74857665 | 74857865 |
| 17 | 74825635 | 74858449 - | NM_001033367 | Nlrc4   | 5223   | 74853026 | 74853226 |
| 17 | 78599588 | 78775933 + | NM_015800    | Crim1   | 73810  | 78673398 | 78673598 |
| 17 | 78599588 | 78775933 + | NM_015800    | Crim1   | 140388 | 78739976 | 78740176 |
| 17 | 78599588 | 78775933 + | NM_015800    | Crim1   | 48855  | 78648443 | 78648643 |
| 17 | 78599588 | 78775933 + | NM_015800    | Crim1   | 55600  | 78655188 | 78655388 |
| 17 | 78599588 | 78775933 + | NM_015800    | Crim1   | 40977  | 78640565 | 78640765 |
| 17 | 78768552 | 78817493 - | NM_001285949 | Fez2    | 2883   | 78814410 | 78814610 |
| 17 | 78768552 | 78817493 - | NM_001285949 | Fez2    | 2573   | 78814720 | 78814920 |
| 17 | 78768552 | 78817493 - | NM_001285949 | Fez2    | 16326  | 78800967 | 78801167 |
| 17 | 78777218 | 78817493 - | NM_001285940 | Fez2    | 2883   | 78814410 | 78814610 |
| 17 | 78777218 | 78817493 - | NM_001285940 | Fez2    | 2573   | 78814720 | 78814920 |
| 17 | 78777218 | 78817493 - | NM_001285940 | Fez2    | 16326  | 78800967 | 78801167 |
| 17 | 78777218 | 78817493 - | NM_001285946 | Fez2    | 2883   | 78814410 | 78814610 |
| 17 | 78777218 | 78817493 - | NM_001285946 | Fez2    | 2573   | 78814720 | 78814920 |
| 17 | 78777218 | 78817493 - | NM_001285946 | Fez2    | 16326  | 78800967 | 78801167 |

|    |          |            |              |         |       |          |          |
|----|----------|------------|--------------|---------|-------|----------|----------|
| 17 | 78777218 | 78817493 - | NM_199448    | Fez2    | 2883  | 78814410 | 78814610 |
| 17 | 78777218 | 78817493 - | NM_199448    | Fez2    | 2573  | 78814720 | 78814920 |
| 17 | 78777218 | 78817493 - | NM_199448    | Fez2    | 16326 | 78800967 | 78801167 |
| 17 | 80106293 | 80114382 - | NM_009994    | Cyp1b1  | 1773  | 80112409 | 80112609 |
| 17 | 80247730 | 80295464 - | NM_001286647 | Atl2    | 3866  | 80291398 | 80291598 |
| 17 | 80247730 | 80295464 - | NM_001286647 | Atl2    | -8612 | 80304076 | 80304276 |
| 17 | 80247730 | 80295464 - | NM_001286647 | Atl2    | 7007  | 80288257 | 80288457 |
| 17 | 80247730 | 80295464 - | NM_019717    | Atl2    | 3866  | 80291398 | 80291598 |
| 17 | 80247730 | 80295464 - | NM_019717    | Atl2    | -8612 | 80304076 | 80304276 |
| 17 | 80247730 | 80295464 - | NM_019717    | Atl2    | 7007  | 80288257 | 80288457 |
| 17 | 80247730 | 80295464 - | NM_178050    | Atl2    | 3866  | 80291398 | 80291598 |
| 17 | 80247730 | 80295464 - | NM_178050    | Atl2    | -8612 | 80304076 | 80304276 |
| 17 | 80247730 | 80295464 - | NM_178050    | Atl2    | 7007  | 80288257 | 80288457 |
| 17 | 80526811 | 80584373 + | NM_176963    | Galm    | 31425 | 80558236 | 80558436 |
| 17 | 80526811 | 80584373 + | NM_176963    | Galm    | 230   | 80527041 | 80527241 |
| 17 | 80637644 | 80689817 - | NM_001163759 | Dhx57   | 34251 | 80655366 | 80655566 |
| 17 | 80637644 | 80689817 - | NM_198942    | Dhx57   | 34251 | 80655366 | 80655566 |
| 17 | 80793092 | 80879794 - | NM_009231    | Sos1    | -168  | 80879962 | 80880162 |
| 17 | 80979853 | 81127366 - | NM_001290345 | Map4k3  | -2027 | 81129393 | 81129593 |
| 17 | 80979853 | 81127366 - | NM_001290345 | Map4k3  | -9712 | 81137078 | 81137278 |
| 17 | 80979853 | 81127366 - | NM_001290345 | Map4k3  | -760  | 81128126 | 81128326 |
| 17 | 80979853 | 81127366 - | NM_001290345 | Map4k3  | 1520  | 81125646 | 81125846 |
| 17 | 83432932 | 83477566 - | NR_045094    | Gm19689 | -2048 | 83479614 | 83479814 |
| 17 | 83750271 | 83879700 + | NM_001114361 | Eml4    | 24959 | 83775230 | 83775430 |
| 17 | 83750271 | 83879700 + | NM_001114362 | Eml4    | 24959 | 83775230 | 83775430 |
| 17 | 83750271 | 83879700 + | NM_001286567 | Eml4    | 24959 | 83775230 | 83775430 |
| 17 | 83750271 | 83879700 + | NM_199466    | Eml4    | 24959 | 83775230 | 83775430 |
| 17 | 84105503 | 84204763 + | NM_001171052 | Mta3    | 61370 | 84166873 | 84167073 |
| 17 | 84105503 | 84192218 + | NM_001171053 | Mta3    | 61370 | 84166873 | 84167073 |
| 17 | 84105503 | 84192218 + | NM_001171054 | Mta3    | 61370 | 84166873 | 84167073 |

|    |          |            |              |               |        |          |          |
|----|----------|------------|--------------|---------------|--------|----------|----------|
| 17 | 84105503 | 84214246 + | NM_054082    | Mta3          | 61370  | 84166873 | 84167073 |
| 17 | 84230694 | 84246131 - | NM_025325    | Hao           | -9225  | 84255356 | 84255556 |
| 17 | 84397892 | 84412749 + | NR_130994    | 8430430B14Rik | -469   | 84397223 | 84397423 |
| 17 | 84589396 | 84865549 - | NM_183021    | Thada         | 89075  | 84776274 | 84776474 |
| 17 | 84589396 | 84865549 - | NM_183021    | Thada         | 33932  | 84831417 | 84831617 |
| 17 | 84589396 | 84865549 - | NM_183021    | Thada         | 114529 | 84750820 | 84751020 |
| 17 | 84589396 | 84865549 - | NM_183021    | Thada         | 90062  | 84775287 | 84775487 |
| 17 | 85057574 | 85082264 - | NM_031884    | Abcg5         | 7781   | 85074283 | 85074483 |
| 17 | 85057574 | 85082264 - | NM_031884    | Abcg5         | -32    | 85082296 | 85082496 |
| 17 | 85057574 | 85082264 - | NM_031884    | Abcg5         | 10255  | 85071809 | 85072009 |
| 17 | 85057574 | 85082264 - | NM_031884    | Abcg5         | 9164   | 85072900 | 85073100 |
| 17 | 85057574 | 85082264 - | NM_031884    | Abcg5         | 23731  | 85058333 | 85058533 |
| 17 | 85075642 | 85099674 + | NM_001286005 | Abcg8         | -1159  | 85074283 | 85074483 |
| 17 | 85075642 | 85099674 + | NM_001286005 | Abcg8         | 6654   | 85082296 | 85082496 |
| 17 | 85075642 | 85099674 + | NM_001286005 | Abcg8         | -3633  | 85071809 | 85072009 |
| 17 | 85075642 | 85099674 + | NM_001286005 | Abcg8         | -2542  | 85072900 | 85073100 |
| 17 | 85082461 | 85099674 + | NM_026180    | Abcg8         | -7978  | 85074283 | 85074483 |
| 17 | 85082461 | 85099674 + | NM_026180    | Abcg8         | 0      | 85082296 | 85082496 |
| 17 | 85082461 | 85099674 + | NM_026180    | Abcg8         | -9361  | 85072900 | 85073100 |
| 17 | 85082461 | 85099674 + | NR_104382    | Abcg8         | -7978  | 85074283 | 85074483 |
| 17 | 85082461 | 85099674 + | NR_104382    | Abcg8         | 0      | 85082296 | 85082496 |
| 17 | 85082461 | 85099674 + | NR_104382    | Abcg8         | -9361  | 85072900 | 85073100 |
| 17 | 85427687 | 85463582 + | NM_009205    | Slc3a1        | 24216  | 85451903 | 85452103 |
| 17 | 85490040 | 85857921 + | NM_028576    | Camkmt        | 12680  | 85502720 | 85502920 |
| 17 | 85490040 | 85857921 + | NM_028576    | Camkmt        | 72944  | 85562984 | 85563184 |
| 17 | 86384005 | 86544516 - | NM_030133    | Srbd1         | 108082 | 86436234 | 86436434 |
| 17 | 86567125 | 87057260 + | NM_011104    | Prkce         | 311714 | 86878839 | 86879039 |
| 17 | 86567125 | 87057260 + | NM_011104    | Prkce         | 356139 | 86923264 | 86923464 |
| 17 | 86567125 | 87057260 + | NM_011104    | Prkce         | 67991  | 86635116 | 86635316 |
| 17 | 86567125 | 87057260 + | NM_011104    | Prkce         | 265340 | 86832465 | 86832665 |

|    |          |            |              |               |        |          |          |
|----|----------|------------|--------------|---------------|--------|----------|----------|
| 17 | 86567125 | 87057260 + | NM_011104    | Prkce         | 271166 | 86838291 | 86838491 |
| 17 | 86567125 | 87057260 + | NM_011104    | Prkce         | 117314 | 86684439 | 86684639 |
| 17 | 86567125 | 87057260 + | NM_011104    | Prkce         | -5521  | 86561404 | 86561604 |
| 17 | 86684507 | 86686519 - | NR_045435    | 2010106C02Rik | 1880   | 86684439 | 86684639 |
| 17 | 87153204 | 87232751 + | NM_010137    | Epas1         | 25527  | 87178731 | 87178931 |
| 17 | 87153204 | 87232751 + | NM_010137    | Epas1         | 27810  | 87181014 | 87181214 |
| 17 | 87153204 | 87232751 + | NM_010137    | Epas1         | 22949  | 87176153 | 87176353 |
| 17 | 87362451 | 87399410 + | NM_145491    | Rhoq          | 34319  | 87396770 | 87396970 |
| 17 | 87396599 | 87424742 - | NM_008838    | Pigf          | 27772  | 87396770 | 87396970 |
| 17 | 87507019 | 87536926 + | NM_019654    | Socs5         | 19833  | 87526852 | 87527052 |
| 17 | 87591556 | 87594283 - | NR_046016    | C330024C12Rik | -7665  | 87601948 | 87602148 |
| 17 | 87653783 | 87665288 - | NM_139295    | Mcf2          | 2152   | 87662936 | 87663136 |
| 17 | 87653783 | 87665288 - | NM_176808    | Mcf2          | 2152   | 87662936 | 87663136 |
| 17 | 87674226 | 87682155 - | NR_015506    | 4833418N02Rik | -8474  | 87690629 | 87690829 |
| 17 | 87682226 | 87781111 + | NM_028639    | Ttc7          | 8403   | 87690629 | 87690829 |
| 17 | 87682226 | 87781111 + | NM_028639    | Ttc7          | 74674  | 87756900 | 87757100 |
| 17 | 87682226 | 87781111 + | NM_028639    | Ttc7          | 54875  | 87737101 | 87737301 |
| 17 | 87788911 | 87827082 - | NM_029298    | 1700011E24Rik | 31507  | 87795375 | 87795575 |
| 17 | 87788911 | 87827082 - | NM_029298    | 1700011E24Rik | -6344  | 87833426 | 87833626 |
| 17 | 87832741 | 87846276 - | NM_007589    | Calm2         | 3436   | 87842640 | 87842840 |
| 17 | 87832741 | 87846276 - | NM_007589    | Calm2         | 0      | 87846091 | 87846291 |
| 17 | 87832741 | 87846276 - | NM_007589    | Calm2         | 12650  | 87833426 | 87833626 |
| 17 | 88035319 | 88050468 + | NM_008532    | Epcam         | -7453  | 88027666 | 88027866 |
| 17 | 88071897 | 88123054 + | NM_008628    | Msh2          | 9190   | 88081087 | 88081287 |
| 17 | 88390199 | 88464626 - | NM_001081034 | Fbxo11        | -913   | 88465539 | 88465739 |
| 17 | 88840052 | 88889874 + | NM_180974    | Foxn2         | 19888  | 88859940 | 88860140 |
| 17 | 88840052 | 88889874 + | NM_180974    | Foxn2         | 25967  | 88866019 | 88866219 |
| 17 | 88840052 | 88889874 + | NM_180974    | Foxn2         | -8915  | 88830937 | 88831137 |
| 17 | 88840052 | 88889874 + | NM_180974    | Foxn2         | 18921  | 88858973 | 88859173 |
| 17 | 89025895 | 89045065 + | NM_029858    | Ston1         | -4799  | 89020896 | 89021096 |

|    |          |            |              |          |         |          |          |
|----|----------|------------|--------------|----------|---------|----------|----------|
| 17 | 90432984 | 91492143 - | NM_020252    | Nrxn1    | 293885  | 91198058 | 91198258 |
| 17 | 90432984 | 91492143 - | NM_020252    | Nrxn1    | 1004081 | 90487862 | 90488062 |
| 17 | 90432984 | 91492143 - | NM_177284    | Nrxn1    | 293885  | 91198058 | 91198258 |
| 17 | 90432984 | 91492143 - | NM_177284    | Nrxn1    | 1004081 | 90487862 | 90488062 |
| 18 | 3294164  | 3337588 -  | NM_001110851 | Crem     | -1154   | 3338742  | 3338942  |
| 18 | 3294164  | 3337588 -  | NM_001110852 | Crem     | -1154   | 3338742  | 3338942  |
| 18 | 3336414  | 3366862 +  | NR_033457    | Gm6225   | 2328    | 3338742  | 3338942  |
| 18 | 6024448  | 6136097 -  | NM_001039692 | Arhgap12 | 49446   | 6086451  | 6086651  |
| 18 | 6024448  | 6136097 -  | NM_001039692 | Arhgap12 | -1442   | 6137539  | 6137739  |
| 18 | 6024448  | 6136097 -  | NM_001039692 | Arhgap12 | 66420   | 6069477  | 6069677  |
| 18 | 6024448  | 6136097 -  | NM_029277    | Arhgap12 | 49446   | 6086451  | 6086651  |
| 18 | 6024448  | 6136097 -  | NM_029277    | Arhgap12 | -1442   | 6137539  | 6137739  |
| 18 | 6024448  | 6136097 -  | NM_029277    | Arhgap12 | 66420   | 6069477  | 6069677  |
| 18 | 6201003  | 6241523 -  | NM_008448    | Kif5b    | 3444    | 6237879  | 6238079  |
| 18 | 6435949  | 6516107 -  | NM_007935    | Epc1     | 60689   | 6455218  | 6455418  |
| 18 | 6435949  | 6516107 -  | NM_007935    | Epc1     | 23634   | 6492273  | 6492473  |
| 18 | 6435949  | 6516107 -  | NM_007935    | Epc1     | 43051   | 6472856  | 6473056  |
| 18 | 6435949  | 6516107 -  | NM_007935    | Epc1     | 65410   | 6450497  | 6450697  |
| 18 | 6435949  | 6490856 -  | NM_027497    | Epc1     | 35438   | 6455218  | 6455418  |
| 18 | 6435949  | 6490856 -  | NM_027497    | Epc1     | -1417   | 6492273  | 6492473  |
| 18 | 6435949  | 6490856 -  | NM_027497    | Epc1     | 17800   | 6472856  | 6473056  |
| 18 | 6435949  | 6490856 -  | NM_027497    | Epc1     | 40159   | 6450497  | 6450697  |
| 18 | 6488890  | 6490856 -  | NM_001276350 | Epc1     | -1417   | 6492273  | 6492473  |
| 18 | 6490562  | 6490645 -  | NR_035446    | Mir1893  | -1628   | 6492273  | 6492473  |
| 18 | 7347960  | 7626862 -  | NM_001081287 | Mpp7     | 145532  | 7481130  | 7481330  |
| 18 | 7379647  | 7626862 -  | NM_001161620 | Mpp7     | 145532  | 7481130  | 7481330  |
| 18 | 7868830  | 7929027 +  | NM_001282093 | Wac      | -254    | 7868376  | 7868576  |
| 18 | 7868830  | 7929027 +  | NM_001282093 | Wac      | -3730   | 7864900  | 7865100  |
| 18 | 7869195  | 7929027 +  | NM_001146298 | Wac      | -619    | 7868376  | 7868576  |
| 18 | 7869195  | 7929027 +  | NM_001146298 | Wac      | -4095   | 7864900  | 7865100  |



|    |          |            |              |               |        |          |          |
|----|----------|------------|--------------|---------------|--------|----------|----------|
| 18 | 7869195  | 7929027 +  | NM_153085    | Wac           | -619   | 7868376  | 7868576  |
| 18 | 7869195  | 7929027 +  | NM_153085    | Wac           | -4095  | 7864900  | 7865100  |
| 18 | 9314042  | 9450149 -  | NM_026484    | Ccny          | 56659  | 9393290  | 9393490  |
| 18 | 9314042  | 9450149 -  | NM_026484    | Ccny          | 42232  | 9407717  | 9407917  |
| 18 | 9314042  | 9450149 -  | NM_026484    | Ccny          | 53417  | 9396532  | 9396732  |
| 18 | 9707646  | 9877994 +  | NM_130449    | Colec12       | 153881 | 9861527  | 9861727  |
| 18 | 10325177 | 10562940 + | NM_001083628 | Greb1l        | 207627 | 10532804 | 10533004 |
| 18 | 10566510 | 10610351 - | NM_001081222 | Esco1         | 41506  | 10568645 | 10568845 |
| 18 | 10644409 | 10706695 - | NM_134130    | Abhd3         | 5970   | 10700525 | 10700725 |
| 18 | 10644409 | 10706695 - | NM_134130    | Abhd3         | 40068  | 10666427 | 10666627 |
| 18 | 10644409 | 10706695 - | NM_134130    | Abhd3         | 23046  | 10683449 | 10683649 |
| 18 | 10644409 | 10706695 - | NM_134130    | Abhd3         | 47060  | 10659435 | 10659635 |
| 18 | 10706858 | 10711831 + | NR_045379    | 4930563E18Rik | -6133  | 10700525 | 10700725 |
| 18 | 11042035 | 11052566 - | NR_105023    | 1010001N08Rik | 1021   | 11051345 | 11051545 |
| 18 | 11042035 | 11052566 - | NR_105023    | 1010001N08Rik | -320   | 11052886 | 11053086 |
| 18 | 11042035 | 11052566 - | NR_105023    | 1010001N08Rik | 6919   | 11045447 | 11045647 |
| 18 | 11049927 | 11052566 - | NR_105022    | 1010001N08Rik | 1021   | 11051345 | 11051545 |
| 18 | 11049927 | 11052566 - | NR_105022    | 1010001N08Rik | -320   | 11052886 | 11053086 |
| 18 | 11052508 | 11085634 + | NM_010258    | Gata6         | -963   | 11051345 | 11051545 |
| 18 | 11052508 | 11085634 + | NM_010258    | Gata6         | 22781  | 11075289 | 11075489 |
| 18 | 11052508 | 11085634 + | NM_010258    | Gata6         | 378    | 11052886 | 11053086 |
| 18 | 11052508 | 11085634 + | NM_010258    | Gata6         | -6861  | 11045447 | 11045647 |
| 18 | 11997783 | 12104137 + | NM_001146287 | Cables1       | 30497  | 12028280 | 12028480 |
| 18 | 11997783 | 12104137 + | NM_022021    | Cables1       | 30497  | 12028280 | 12028480 |
| 18 | 12139812 | 12280047 - | NM_001289666 | Tmem241       | 110943 | 12168904 | 12169104 |
| 18 | 12139812 | 12280047 - | NM_001289666 | Tmem241       | 112141 | 12167706 | 12167906 |
| 18 | 12139812 | 12280047 - | NM_001289667 | Tmem241       | 110943 | 12168904 | 12169104 |
| 18 | 12139812 | 12280047 - | NM_001289667 | Tmem241       | 112141 | 12167706 | 12167906 |
| 18 | 12139812 | 12280047 - | NM_178801    | Tmem241       | 110943 | 12168904 | 12169104 |
| 18 | 12139812 | 12280047 - | NM_178801    | Tmem241       | 112141 | 12167706 | 12167906 |

|    |          |            |              |               |        |          |          |
|----|----------|------------|--------------|---------------|--------|----------|----------|
| 18 | 12139812 | 12280047 - | NR_110356    | Tmem241       | 110943 | 12168904 | 12169104 |
| 18 | 12139812 | 12280047 - | NR_110356    | Tmem241       | 112141 | 12167706 | 12167906 |
| 18 | 12287359 | 12315877 + | NM_024182    | Riok3         | 3549   | 12290908 | 12291108 |
| 18 | 12327239 | 12348479 + | NM_029623    | 3110002H16Rik | -1283  | 12325756 | 12325956 |
| 18 | 12410866 | 12464230 - | NM_001190371 | Ankrd29       | 49465  | 12414565 | 12414765 |
| 18 | 12410866 | 12464230 - | NM_001190371 | Ankrd29       | 47213  | 12416817 | 12417017 |
| 18 | 12802042 | 12895562 + | NM_028341    | Ttc39c        | 59305  | 12861347 | 12861547 |
| 18 | 12802042 | 12895562 + | NM_028341    | Ttc39c        | 81849  | 12883891 | 12884091 |
| 18 | 12802042 | 12895562 + | NM_028341    | Ttc39c        | 56115  | 12858157 | 12858357 |
| 18 | 12802042 | 12895562 + | NM_028341    | Ttc39c        | 58518  | 12860560 | 12860760 |
| 18 | 12913821 | 13038489 - | NM_001252489 | Osbp1a        | 71587  | 12966702 | 12966902 |
| 18 | 12913821 | 13038489 - | NM_001252489 | Osbp1a        | 69968  | 12968321 | 12968521 |
| 18 | 12913821 | 13021890 - | NM_001252490 | Osbp1a        | 54988  | 12966702 | 12966902 |
| 18 | 12913821 | 13021890 - | NM_001252490 | Osbp1a        | 53369  | 12968321 | 12968521 |
| 18 | 12913821 | 13021223 - | NM_001252491 | Osbp1a        | 54321  | 12966702 | 12966902 |
| 18 | 12913821 | 13021223 - | NM_001252491 | Osbp1a        | 52702  | 12968321 | 12968521 |
| 18 | 12913821 | 13021223 - | NM_001252492 | Osbp1a        | 54321  | 12966702 | 12966902 |
| 18 | 12913821 | 13021223 - | NM_001252492 | Osbp1a        | 52702  | 12968321 | 12968521 |
| 18 | 12913821 | 13021223 - | NM_001252493 | Osbp1a        | 54321  | 12966702 | 12966902 |
| 18 | 12913821 | 13021223 - | NM_001252493 | Osbp1a        | 52702  | 12968321 | 12968521 |
| 18 | 12913821 | 13100351 - | NM_207530    | Osbp1a        | -6023  | 13106374 | 13106574 |
| 18 | 12913821 | 13100351 - | NM_207530    | Osbp1a        | -7283  | 13107634 | 13107834 |
| 18 | 12913821 | 13100351 - | NM_207530    | Osbp1a        | 133449 | 12966702 | 12966902 |
| 18 | 12913821 | 13100351 - | NM_207530    | Osbp1a        | 131830 | 12968321 | 12968521 |
| 18 | 12913821 | 12978417 - | NR_045524    | Osbp1a        | 11515  | 12966702 | 12966902 |
| 18 | 12913821 | 12978417 - | NR_045524    | Osbp1a        | 9896   | 12968321 | 12968521 |
| 18 | 14941754 | 15058869 + | NM_001100449 | Taf4b         | 103742 | 15045496 | 15045696 |
| 18 | 20189299 | 20218007 - | NM_013505    | Dsc2          | 6682   | 20211125 | 20211325 |
| 18 | 20189299 | 20218007 - | NM_013505    | Dsc2          | -154   | 20218161 | 20218361 |
| 18 | 20189299 | 20218007 - | NM_013505    | Dsc2          | 18418  | 20199389 | 20199589 |

|    |          |            |              |         |        |          |          |
|----|----------|------------|--------------|---------|--------|----------|----------|
| 18 | 20594676 | 20630323 + | NM_181564    | Dsg4    | 21573  | 20616249 | 20616449 |
| 18 | 20823751 | 20832828 + | NM_013697    | Ttr     | 946    | 20824697 | 20824897 |
| 18 | 20823751 | 20832828 + | NM_013697    | Ttr     | -3739  | 20819812 | 20820012 |
| 18 | 20843100 | 20904906 - | NM_019737    | B4galt6 | 4668   | 20900038 | 20900238 |
| 18 | 20843100 | 20904906 - | NM_019737    | B4galt6 | -3374  | 20908280 | 20908480 |
| 18 | 20843100 | 20904906 - | NM_019737    | B4galt6 | -2667  | 20907573 | 20907773 |
| 18 | 20843100 | 20904906 - | NM_019737    | B4galt6 | 27594  | 20877112 | 20877312 |
| 18 | 20843100 | 20904906 - | NM_019737    | B4galt6 | 11996  | 20892710 | 20892910 |
| 18 | 20843100 | 20904906 - | NM_019737    | B4galt6 | 6211   | 20898495 | 20898695 |
| 18 | 20843100 | 20904906 - | NM_019737    | B4galt6 | 26342  | 20878364 | 20878564 |
| 18 | 20843100 | 20904906 - | NM_019737    | B4galt6 | 32719  | 20871987 | 20872187 |
| 18 | 21103126 | 21142350 + | NM_026301    | Rnf125  | -5712  | 21097214 | 21097414 |
| 18 | 21159801 | 21186726 + | NM_001303005 | Rnf138  | 19011  | 21178812 | 21179012 |
| 18 | 21159801 | 21186726 + | NM_019706    | Rnf138  | 19011  | 21178812 | 21179012 |
| 18 | 21160458 | 21186726 + | NM_001303011 | Rnf138  | 18354  | 21178812 | 21179012 |
| 18 | 21160458 | 21186726 + | NM_207623    | Rnf138  | 18354  | 21178812 | 21179012 |
| 18 | 21230845 | 21258701 + | NM_008586    | Mep1b   | 26608  | 21257453 | 21257653 |
| 18 | 21230845 | 21258701 + | NM_008586    | Mep1b   | -3     | 21230642 | 21230842 |
| 18 | 21230845 | 21258701 + | NM_008586    | Mep1b   | 15699  | 21246544 | 21246744 |
| 18 | 21285843 | 21458641 - | NM_001033445 | Garem   | 139968 | 21318473 | 21318673 |
| 18 | 21285843 | 21458641 - | NM_001033445 | Garem   | 69564  | 21388877 | 21389077 |
| 18 | 23468521 | 23818221 + | NM_001285813 | Dtna    | 256389 | 23724910 | 23725110 |
| 18 | 23573910 | 23818221 + | NM_001285807 | Dtna    | 151000 | 23724910 | 23725110 |
| 18 | 23573910 | 23794279 + | NM_001285811 | Dtna    | 151000 | 23724910 | 23725110 |
| 18 | 23573910 | 23762733 + | NM_010087    | Dtna    | 151000 | 23724910 | 23725110 |
| 18 | 23573910 | 23818221 + | NM_207650    | Dtna    | 151000 | 23724910 | 23725110 |
| 18 | 23655983 | 23818221 + | NM_001285808 | Dtna    | 68927  | 23724910 | 23725110 |
| 18 | 23655983 | 23818221 + | NM_001285810 | Dtna    | 68927  | 23724910 | 23725110 |
| 18 | 23655983 | 23818221 + | NM_001285817 | Dtna    | 68927  | 23724910 | 23725110 |
| 18 | 23910834 | 24052363 + | NM_001162942 | Mapre2  | 70748  | 23981582 | 23981782 |

|    |          |            |              |               |       |          |          |
|----|----------|------------|--------------|---------------|-------|----------|----------|
| 18 | 23910834 | 24052363 + | NM_001162942 | Mapre2        | 89163 | 23999997 | 24000197 |
| 18 | 23912226 | 24052363 + | NM_001162941 | Mapre2        | 69356 | 23981582 | 23981782 |
| 18 | 23912226 | 24052363 + | NM_001162941 | Mapre2        | 87771 | 23999997 | 24000197 |
| 18 | 23962471 | 24052363 + | NM_153058    | Mapre2        | 19111 | 23981582 | 23981782 |
| 18 | 23962471 | 24052363 + | NM_153058    | Mapre2        | 37526 | 23999997 | 24000197 |
| 18 | 24263262 | 24280321 - | NM_172625    | Ino80c        | -7444 | 24287765 | 24287965 |
| 18 | 24363845 | 24445318 + | NM_013814    | Galnt1        | 44934 | 24408779 | 24408979 |
| 18 | 24363845 | 24445318 + | NM_013814    | Galnt1        | 51905 | 24415750 | 24415950 |
| 18 | 24364495 | 24445318 + | NM_001160404 | Galnt1        | 44284 | 24408779 | 24408979 |
| 18 | 24364495 | 24445318 + | NM_001160404 | Galnt1        | 51255 | 24415750 | 24415950 |
| 18 | 24812192 | 24860058 + | NM_026779    | Mocos         | 784   | 24812976 | 24813176 |
| 18 | 31919478 | 31943738 + | NM_153515    | Ammecr1l      | -349  | 31918929 | 31919129 |
| 18 | 31919478 | 31943738 + | NM_153515    | Ammecr1l      | 1678  | 31921156 | 31921356 |
| 18 | 31920270 | 31943738 + | NM_001242430 | Ammecr1l      | -1141 | 31918929 | 31919129 |
| 18 | 31920270 | 31943738 + | NM_001242430 | Ammecr1l      | 886   | 31921156 | 31921356 |
| 18 | 31963711 | 32068642 + | NM_028866    | Wdr33         | 52833 | 32016544 | 32016744 |
| 18 | 32068748 | 32071558 - | NM_026006    | Sft2d3        | -4523 | 32076081 | 32076281 |
| 18 | 32102653 | 32109291 - | NM_001025381 | Gpr17         | -9165 | 32118456 | 32118656 |
| 18 | 32118888 | 32196586 - | NM_032394    | Myo7b         | 6501  | 32189885 | 32190085 |
| 18 | 32118888 | 32196586 - | NM_032394    | Myo7b         | -5347 | 32201933 | 32202133 |
| 18 | 32118888 | 32196586 - | NM_032394    | Myo7b         | 1754  | 32194632 | 32194832 |
| 18 | 32118888 | 32196586 - | NM_032394    | Myo7b         | 20190 | 32176196 | 32176396 |
| 18 | 32118888 | 32196586 - | NM_032394    | Myo7b         | 11743 | 32184643 | 32184843 |
| 18 | 32118888 | 32196586 - | NM_032394    | Myo7b         | 37588 | 32158798 | 32158998 |
| 18 | 32322743 | 32396406 + | NM_011946    | Map3k2        | 13865 | 32336608 | 32336808 |
| 18 | 32322743 | 32396406 + | NM_011946    | Map3k2        | 14337 | 32337080 | 32337280 |
| 18 | 32322743 | 32396406 + | NM_011946    | Map3k2        | -9411 | 32313132 | 32313332 |
| 18 | 32518711 | 32537939 - | NR_045403    | A830052D11Rik | 1753  | 32535986 | 32536186 |
| 18 | 32536871 | 32595395 + | NM_001083334 | Bin1          | -685  | 32535986 | 32536186 |
| 18 | 32536871 | 32595395 + | NM_001083334 | Bin1          | 21691 | 32558562 | 32558762 |

|    |          |            |              |               |        |          |          |
|----|----------|------------|--------------|---------------|--------|----------|----------|
| 18 | 32536871 | 32595395 + | NM_009668    | Bin1          | -685   | 32535986 | 32536186 |
| 18 | 32536871 | 32595395 + | NM_009668    | Bin1          | 21691  | 32558562 | 32558762 |
| 18 | 32823296 | 32996942 - | NR_045381    | 4930455D15Rik | -698   | 32997640 | 32997840 |
| 18 | 32996879 | 33026075 + | NM_001110015 | Wdr36         | 761    | 32997640 | 32997840 |
| 18 | 32996879 | 33026004 + | NM_001110016 | Wdr36         | 761    | 32997640 | 32997840 |
| 18 | 32996879 | 33012897 + | NM_144863    | Wdr36         | 761    | 32997640 | 32997840 |
| 18 | 33040227 | 33040328 - | NR_105779    | Mir6361       | -44    | 33040372 | 33040572 |
| 18 | 33098695 | 33355422 + | NM_009793    | Camk4         | 42458  | 33141153 | 33141353 |
| 18 | 33098695 | 33355422 + | NM_009793    | Camk4         | 43665  | 33142360 | 33142560 |
| 18 | 33361075 | 33373471 - | NM_133774    | Stard4        | 4197   | 33369074 | 33369274 |
| 18 | 33361075 | 33373471 - | NM_133774    | Stard4        | -1057  | 33374528 | 33374728 |
| 18 | 33361075 | 33373471 - | NM_133774    | Stard4        | 2642   | 33370629 | 33370829 |
| 18 | 33955981 | 34166861 - | NM_013512    | Epb4.1l4a     | 202870 | 33963791 | 33963991 |
| 18 | 34367429 | 34381427 - | NR_040534    | Gm10548       | -7064  | 34388491 | 34388691 |
| 18 | 34367429 | 34381427 - | NR_040534    | Gm10548       | 1026   | 34380201 | 34380401 |
| 18 | 34380638 | 34481845 + | NM_007462    | Apc           | 7853   | 34388491 | 34388691 |
| 18 | 34380638 | 34481845 + | NM_007462    | Apc           | -237   | 34380201 | 34380401 |
| 18 | 34569077 | 34601449 + | NM_001163004 | Pkd2l2        | 12405  | 34581482 | 34581682 |
| 18 | 34569077 | 34601449 + | NM_001163004 | Pkd2l2        | 1033   | 34570110 | 34570310 |
| 18 | 34569077 | 34602443 + | NM_016927    | Pkd2l2        | 12405  | 34581482 | 34581682 |
| 18 | 34569077 | 34602443 + | NM_016927    | Pkd2l2        | 1033   | 34570110 | 34570310 |
| 18 | 34701982 | 34707716 + | NM_009290    | Wnt8a         | -3704  | 34698078 | 34698278 |
| 18 | 34791337 | 34811391 - | NM_178347    | Cdc23         | 3754   | 34807437 | 34807637 |
| 18 | 34936662 | 34999025 + | NM_001081256 | Kdm3b         | 6433   | 34943095 | 34943295 |
| 18 | 35062439 | 35091658 - | NM_144866    | Etf1          | -4524  | 35096182 | 35096382 |
| 18 | 35097069 | 35114006 - | NM_010481    | Hspa9         | -157   | 35114163 | 35114363 |
| 18 | 35278566 | 35414430 + | NM_009818    | Ctnna1        | 2616   | 35281182 | 35281382 |
| 18 | 35278566 | 35414430 + | NM_009818    | Ctnna1        | 53164  | 35331730 | 35331930 |
| 18 | 35278566 | 35414430 + | NM_009818    | Ctnna1        | 18626  | 35297192 | 35297392 |
| 18 | 35278566 | 35414430 + | NM_009818    | Ctnna1        | 15703  | 35294269 | 35294469 |

|    |          |            |              |         |        |          |          |
|----|----------|------------|--------------|---------|--------|----------|----------|
| 18 | 35426050 | 35658580 - | NM_030749    | Sil1    | 231322 | 35427058 | 35427258 |
| 18 | 35774258 | 35786882 - | NM_011397    | Slc23a1 | -211   | 35787093 | 35787293 |
| 18 | 35774258 | 35786882 - | NM_011397    | Slc23a1 | -4780  | 35791662 | 35791862 |
| 18 | 36440816 | 36447899 + | NM_008989    | Pura    | 4372   | 36445188 | 36445388 |
| 18 | 36459755 | 36461133 + | NM_001267796 | Igip    | -510   | 36459045 | 36459245 |
| 18 | 36508278 | 36553025 + | NM_001081365 | Cystm1  | 29754  | 36538032 | 36538232 |
| 18 | 36508278 | 36553025 + | NM_001081365 | Cystm1  | 37066  | 36545344 | 36545544 |
| 18 | 36508278 | 36553025 + | NM_001081365 | Cystm1  | 38291  | 36546569 | 36546769 |
| 18 | 36508278 | 36553025 + | NM_001081365 | Cystm1  | 35531  | 36543809 | 36544009 |
| 18 | 36508278 | 36553025 + | NM_001081365 | Cystm1  | -93    | 36507985 | 36508185 |
| 18 | 36508278 | 36553025 + | NM_001081365 | Cystm1  | 26402  | 36534680 | 36534880 |
| 18 | 36508278 | 36553025 + | NM_001081365 | Cystm1  | -4272  | 36503806 | 36504006 |
| 18 | 36563333 | 36614150 - | NM_026027    | Pfdn1   | 48587  | 36565363 | 36565563 |
| 18 | 36687806 | 36704263 + | NM_001271544 | Slc4a9  | 2674   | 36690480 | 36690680 |
| 18 | 36687806 | 36704263 + | NM_001271545 | Slc4a9  | 2674   | 36690480 | 36690680 |
| 18 | 36687806 | 36704263 + | NM_001271546 | Slc4a9  | 2674   | 36690480 | 36690680 |
| 18 | 36687806 | 36715927 + | NM_001271547 | Slc4a9  | 24208  | 36712014 | 36712214 |
| 18 | 36687806 | 36715927 + | NM_001271547 | Slc4a9  | 2674   | 36690480 | 36690680 |
| 18 | 36687806 | 36704263 + | NM_172830    | Slc4a9  | 2674   | 36690480 | 36690680 |
| 18 | 36720257 | 36818563 + | NM_175375    | Ankhd1  | -8043  | 36712014 | 36712214 |
| 18 | 36884718 | 36886470 - | NM_009841    | Cd14    | -7842  | 36894312 | 36894512 |
| 18 | 36884718 | 36886470 - | NM_009841    | Cd14    | 400    | 36885870 | 36886070 |
| 18 | 36894724 | 36902046 + | NM_028036    | Tmco6   | -212   | 36894312 | 36894512 |
| 18 | 36894724 | 36902046 + | NM_028036    | Tmco6   | -8654  | 36885870 | 36886070 |
| 18 | 36904310 | 36917294 + | NM_011879    | Ik      | -9798  | 36894312 | 36894512 |
| 18 | 38003255 | 38095078 - | NM_001305980 | Diap1   | 2634   | 38092244 | 38092444 |
| 18 | 38003255 | 38095078 - | NM_001305980 | Diap1   | 7425   | 38087453 | 38087653 |
| 18 | 38003255 | 38095078 - | NM_001305981 | Diap1   | 2634   | 38092244 | 38092444 |
| 18 | 38003255 | 38095078 - | NM_001305981 | Diap1   | 7425   | 38087453 | 38087653 |
| 18 | 38003255 | 38095078 - | NM_007858    | Diap1   | 2634   | 38092244 | 38092444 |

|    |          |            |              |          |        |          |          |
|----|----------|------------|--------------|----------|--------|----------|----------|
| 18 | 38003255 | 38095078 - | NM_007858    | Diap1    | 7425   | 38087453 | 38087653 |
| 18 | 38117088 | 38129386 - | NM_175684    | Fchsd1   | -8164  | 38137550 | 38137750 |
| 18 | 38132277 | 38158624 - | NM_001205336 | Arap3    | 20874  | 38137550 | 38137750 |
| 18 | 38132277 | 38157229 - | NM_139206    | Arap3    | 19479  | 38137550 | 38137750 |
| 18 | 38134157 | 38134272 - | NR_105947    | Mir6981  | -3278  | 38137550 | 38137750 |
| 18 | 38356348 | 38369417 - | NM_029357    | Pcdh1    | 1593   | 38367624 | 38367824 |
| 18 | 38356348 | 38369417 - | NM_029357    | Pcdh1    | 5676   | 38363541 | 38363741 |
| 18 | 38426746 | 38444056 - | NM_017378    | Pcdh12   | 7558   | 38436298 | 38436498 |
| 18 | 38487191 | 38498648 - | NM_011937    | Gnpda1   | -9534  | 38508182 | 38508382 |
| 18 | 38487191 | 38498648 - | NM_011937    | Gnpda1   | -2481  | 38501129 | 38501329 |
| 18 | 38578629 | 38624061 + | NM_022996    | Ndfip1   | -6467  | 38571962 | 38572162 |
| 18 | 38578629 | 38624061 + | NM_022996    | Ndfip1   | 400    | 38579029 | 38579229 |
| 18 | 39152799 | 39535940 + | NM_175164    | Arhgap26 | 107113 | 39259912 | 39260112 |
| 18 | 39152799 | 39535940 + | NM_175164    | Arhgap26 | 278045 | 39430844 | 39431044 |
| 18 | 39152799 | 39535940 + | NM_175164    | Arhgap26 | 249429 | 39402228 | 39402428 |
| 18 | 39152799 | 39535940 + | NM_175164    | Arhgap26 | 259886 | 39412685 | 39412885 |
| 18 | 39152799 | 39535940 + | NM_175164    | Arhgap26 | 198098 | 39350897 | 39351097 |
| 18 | 39152799 | 39535940 + | NM_175164    | Arhgap26 | 11945  | 39164744 | 39164944 |
| 18 | 39152799 | 39535940 + | NM_175164    | Arhgap26 | 68139  | 39220938 | 39221138 |
| 18 | 39152799 | 39535940 + | NM_175164    | Arhgap26 | -2625  | 39149974 | 39150174 |
| 18 | 40418015 | 40690839 + | NM_026135    | Kctd16   | 49768  | 40467783 | 40467983 |
| 18 | 42035350 | 42110849 - | NM_029942    | Preli2   | 47574  | 42063075 | 42063275 |
| 18 | 42213364 | 42318350 + | NM_001146299 | Sh3rf2   | -2795  | 42210369 | 42210569 |
| 18 | 42213364 | 42318350 + | NM_001146299 | Sh3rf2   | 58528  | 42271892 | 42272092 |
| 18 | 42213364 | 42318350 + | NM_001146299 | Sh3rf2   | 2822   | 42216186 | 42216386 |
| 18 | 42213364 | 42318350 + | NM_001146299 | Sh3rf2   | 33968  | 42247332 | 42247532 |
| 18 | 42213364 | 42318350 + | NM_001146299 | Sh3rf2   | -2052  | 42211112 | 42211312 |
| 18 | 42213364 | 42318350 + | NM_172966    | Sh3rf2   | -2795  | 42210369 | 42210569 |
| 18 | 42213364 | 42318350 + | NM_172966    | Sh3rf2   | 58528  | 42271892 | 42272092 |
| 18 | 42213364 | 42318350 + | NM_172966    | Sh3rf2   | 2822   | 42216186 | 42216386 |

|    |          |            |              |               |        |          |          |
|----|----------|------------|--------------|---------------|--------|----------|----------|
| 18 | 42213364 | 42318350 + | NM_172966    | Sh3rf2        | 33968  | 42247332 | 42247532 |
| 18 | 42213364 | 42318350 + | NM_172966    | Sh3rf2        | -2052  | 42211112 | 42211312 |
| 18 | 42362003 | 42421726 - | NM_134137    | Lars          | 26161  | 42395365 | 42395565 |
| 18 | 42434034 | 42434852 - | NR_033452    | Gm4013        | 0      | 42434662 | 42434862 |
| 18 | 42435007 | 42501195 + | NM_172626    | Rbm27         | -145   | 42434662 | 42434862 |
| 18 | 42737674 | 42739307 - | NM_181543    | Gpr151        | -112   | 42739419 | 42739619 |
| 18 | 42804875 | 43219126 - | NM_028392    | Ppp2r2b       | 181960 | 43036966 | 43037166 |
| 18 | 42804875 | 43059161 - | NR_073583    | Ppp2r2b       | 21995  | 43036966 | 43037166 |
| 18 | 43887723 | 43896892 - | NM_009258    | Spink1        | 3222   | 43893470 | 43893670 |
| 18 | 43887723 | 43896892 - | NM_009258    | Spink1        | -2799  | 43899691 | 43899891 |
| 18 | 43887723 | 43896892 - | NM_009258    | Spink1        | -280   | 43897172 | 43897372 |
| 18 | 44122895 | 44182142 + | NM_001081180 | Spink5        | 20063  | 44142958 | 44143158 |
| 18 | 44540154 | 44584624 + | NM_027490    | Dcp2          | 9190   | 44549344 | 44549544 |
| 18 | 44584714 | 44971837 - | NM_001085373 | Mcc           | 142929 | 44828708 | 44828908 |
| 18 | 44584714 | 44971837 - | NM_001085373 | Mcc           | 188507 | 44783130 | 44783330 |
| 18 | 44584714 | 44971837 - | NM_001085373 | Mcc           | 186769 | 44784868 | 44785068 |
| 18 | 44584714 | 44971837 - | NM_001085373 | Mcc           | 257897 | 44713740 | 44713940 |
| 18 | 44584714 | 44821921 - | NM_001085374 | Mcc           | -6787  | 44828708 | 44828908 |
| 18 | 44584714 | 44821921 - | NM_001085374 | Mcc           | 38591  | 44783130 | 44783330 |
| 18 | 44584714 | 44821921 - | NM_001085374 | Mcc           | 36853  | 44784868 | 44785068 |
| 18 | 44584714 | 44821921 - | NM_001085374 | Mcc           | 107981 | 44713740 | 44713940 |
| 18 | 44821319 | 44835926 + | NR_026853    | A930012L18Rik | 7389   | 44828708 | 44828908 |
| 18 | 46324954 | 46358473 - | NM_001170855 | Trim36        | 30579  | 46327694 | 46327894 |
| 18 | 46324954 | 46372262 - | NM_178872    | Trim36        | 44368  | 46327694 | 46327894 |
| 18 | 46872859 | 46887997 - | NM_033037    | Cdo1          | 13149  | 46874648 | 46874848 |
| 18 | 47404908 | 47528525 - | NM_001311097 | Sema6a        | 36381  | 47491944 | 47492144 |
| 18 | 47404908 | 47528525 - | NM_001311097 | Sema6a        | 521    | 47527804 | 47528004 |
| 18 | 47404908 | 47528525 - | NM_001311097 | Sema6a        | -1442  | 47529967 | 47530167 |
| 18 | 47404908 | 47528525 - | NM_001311097 | Sema6a        | 26917  | 47501408 | 47501608 |
| 18 | 47404908 | 47528525 - | NM_001311097 | Sema6a        | 27360  | 47500965 | 47501165 |



|    |          |            |              |               |        |          |          |
|----|----------|------------|--------------|---------------|--------|----------|----------|
| 18 | 47404908 | 47528525 - | NM_001311097 | Sema6a        | 42049  | 47486276 | 47486476 |
| 18 | 47404908 | 47528523 - | NM_018744    | Sema6a        | 36379  | 47491944 | 47492144 |
| 18 | 47404908 | 47528523 - | NM_018744    | Sema6a        | 519    | 47527804 | 47528004 |
| 18 | 47404908 | 47528523 - | NM_018744    | Sema6a        | -1444  | 47529967 | 47530167 |
| 18 | 47404908 | 47528523 - | NM_018744    | Sema6a        | 26915  | 47501408 | 47501608 |
| 18 | 47404908 | 47528523 - | NM_018744    | Sema6a        | 27358  | 47500965 | 47501165 |
| 18 | 47404908 | 47528523 - | NM_018744    | Sema6a        | 42047  | 47486276 | 47486476 |
| 18 | 47612322 | 47630523 + | NR_033453    | 9130209A04Rik | -8586  | 47603536 | 47603736 |
| 18 | 49992651 | 50125128 + | NM_001081371 | Dmxl1         | 1576   | 49994227 | 49994427 |
| 18 | 50139081 | 50252884 + | NM_001177759 | Tnfaip8       | 104952 | 50244033 | 50244233 |
| 18 | 50139081 | 50252884 + | NM_001177760 | Tnfaip8       | 104952 | 50244033 | 50244233 |
| 18 | 50212936 | 50252884 + | NM_134131    | Tnfaip8       | 31097  | 50244033 | 50244233 |
| 18 | 50287855 | 50355925 + | NM_008292    | Hsd17b4       | 622    | 50288477 | 50288677 |
| 18 | 50287855 | 50355925 + | NM_008292    | Hsd17b4       | 3602   | 50291457 | 50291657 |
| 18 | 50287855 | 50355925 + | NM_008292    | Hsd17b4       | -1167  | 50286488 | 50286688 |
| 18 | 53336019 | 53380515 + | NM_026386    | Snx2          | 6627   | 53342646 | 53342846 |
| 18 | 53405316 | 53550480 + | NM_029394    | Snx24         | 10738  | 53416054 | 53416254 |
| 18 | 53405316 | 53550480 + | NM_029394    | Snx24         | 19192  | 53424508 | 53424708 |
| 18 | 54021767 | 54115339 + | NM_152809    | Csnk1g3       | 23347  | 54045114 | 54045314 |
| 18 | 54021767 | 54115339 + | NM_152809    | Csnk1g3       | 16320  | 54038087 | 54038287 |
| 18 | 54581949 | 54612949 + | NR_040338    | Redrum        | 21420  | 54603369 | 54603569 |
| 18 | 55047699 | 55149835 - | NM_175751    | Zfp608        | 56355  | 55093280 | 55093480 |
| 18 | 55047699 | 55149835 - | NM_175751    | Zfp608        | 18967  | 55130668 | 55130868 |
| 18 | 55047699 | 55149835 - | NM_175751    | Zfp608        | 27982  | 55121653 | 55121853 |
| 18 | 55047699 | 55149835 - | NM_175751    | Zfp608        | 83250  | 55066385 | 55066585 |
| 18 | 56591786 | 56663447 + | NM_026240    | Gramd3        | 41729  | 56633515 | 56633715 |
| 18 | 56591786 | 56663447 + | NM_026240    | Gramd3        | 54123  | 56645909 | 56646109 |
| 18 | 56591786 | 56663447 + | NM_026240    | Gramd3        | -628   | 56590958 | 56591158 |
| 18 | 56591786 | 56663447 + | NM_026240    | Gramd3        | 19919  | 56611705 | 56611905 |
| 18 | 56591786 | 56663447 + | NM_026240    | Gramd3        | -2984  | 56588602 | 56588802 |

|    |          |            |              |               |        |          |          |
|----|----------|------------|--------------|---------------|--------|----------|----------|
| 18 | 56685390 | 56732594 - | NM_001127338 | Aldh7a1       | 16216  | 56716178 | 56716378 |
| 18 | 56685390 | 56721953 - | NM_138600    | Aldh7a1       | 5575   | 56716178 | 56716378 |
| 18 | 56722223 | 56747367 + | NM_001162989 | Phax          | -5845  | 56716178 | 56716378 |
| 18 | 56867467 | 56913080 + | NM_010721    | Lmnb1         | -2975  | 56864292 | 56864492 |
| 18 | 56867467 | 56913080 + | NM_010721    | Lmnb1         | 16058  | 56883525 | 56883725 |
| 18 | 57115485 | 57135034 - | NM_029909    | C330018D20Rik | -2505  | 57137539 | 57137739 |
| 18 | 57514387 | 57552374 + | NM_028447    | Prrc1         | 1346   | 57515733 | 57515933 |
| 18 | 57693434 | 57890720 + | NM_001311063 | 1700011I03Rik | 115133 | 57808567 | 57808767 |
| 18 | 57693434 | 57890720 + | NM_001311063 | 1700011I03Rik | 140837 | 57834271 | 57834471 |
| 18 | 57693434 | 57890720 + | NM_001311063 | 1700011I03Rik | 128200 | 57821634 | 57821834 |
| 18 | 57693434 | 57890720 + | NM_001311063 | 1700011I03Rik | 80983  | 57774417 | 57774617 |
| 18 | 57693434 | 57890720 + | NM_001311063 | 1700011I03Rik | 114510 | 57807944 | 57808144 |
| 18 | 57693434 | 57890720 + | NM_001311063 | 1700011I03Rik | 17896  | 57711330 | 57711530 |
| 18 | 57693480 | 57890720 + | NM_029290    | 1700011I03Rik | 115087 | 57808567 | 57808767 |
| 18 | 57693480 | 57890720 + | NM_029290    | 1700011I03Rik | 140791 | 57834271 | 57834471 |
| 18 | 57693480 | 57890720 + | NM_029290    | 1700011I03Rik | 128154 | 57821634 | 57821834 |
| 18 | 57693480 | 57890720 + | NM_029290    | 1700011I03Rik | 80937  | 57774417 | 57774617 |
| 18 | 57693480 | 57890720 + | NM_029290    | 1700011I03Rik | 114464 | 57807944 | 57808144 |
| 18 | 57693480 | 57890720 + | NM_029290    | 1700011I03Rik | 17850  | 57711330 | 57711530 |
| 18 | 57705015 | 57711522 - | NR_027945    | 4930511M06Rik | 0      | 57711330 | 57711530 |
| 18 | 57705668 | 57712052 - | NR_015494    | 4930511M06Rik | 522    | 57711330 | 57711530 |
| 18 | 57705668 | 57712050 - | NR_027944    | 4930511M06Rik | 520    | 57711330 | 57711530 |
| 18 | 57791733 | 57798240 - | NR_045360    | 2210409D07Rik | -9704  | 57807944 | 57808144 |
| 18 | 58038332 | 58106476 + | NM_009194    | Slc12a2       | 2131   | 58040463 | 58040663 |
| 18 | 60753644 | 60783960 - | NM_177340    | Synpo         | 17629  | 60766131 | 60766331 |
| 18 | 60753644 | 60783960 - | NM_177340    | Synpo         | 19280  | 60764480 | 60764680 |
| 18 | 60759860 | 60769759 - | NM_001109975 | Synpo         | 3428   | 60766131 | 60766331 |
| 18 | 60759860 | 60769759 - | NM_001109975 | Synpo         | 5079   | 60764480 | 60764680 |
| 18 | 60823064 | 60831279 + | NR_045401    | G630071F17Rik | -9991  | 60812873 | 60813073 |
| 18 | 60934250 | 60938201 + | NM_020600    | Rps14         | -4372  | 60929678 | 60929878 |

|    |          |            |              |           |        |          |          |
|----|----------|------------|--------------|-----------|--------|----------|----------|
| 18 | 61155034 | 61173854 - | NM_201353    | Slc6a7    | -4266  | 61178120 | 61178320 |
| 18 | 61178516 | 61195854 - | NM_009880    | Cdx1      | -3343  | 61199197 | 61199397 |
| 18 | 61204804 | 61244722 + | NM_001146268 | Pdgfrb    | 21783  | 61226587 | 61226787 |
| 18 | 61204804 | 61244722 + | NM_001146268 | Pdgfrb    | -5407  | 61199197 | 61199397 |
| 18 | 61204804 | 61244722 + | NM_008809    | Pdgfrb    | 21783  | 61226587 | 61226787 |
| 18 | 61204804 | 61244722 + | NM_008809    | Pdgfrb    | -5407  | 61199197 | 61199397 |
| 18 | 61290931 | 61336705 - | NM_134134    | Hmgxb3    | 16202  | 61320303 | 61320503 |
| 18 | 61290931 | 61336704 - | NM_178277    | Hmgxb3    | 16201  | 61320303 | 61320503 |
| 18 | 61356508 | 61371251 - | NM_007885    | Slc26a2   | -6796  | 61378047 | 61378247 |
| 18 | 61356508 | 61371251 - | NM_007885    | Slc26a2   | -8689  | 61379940 | 61380140 |
| 18 | 61380153 | 61449373 + | NM_146086    | Pde6a     | -1906  | 61378047 | 61378247 |
| 18 | 61380153 | 61449373 + | NM_146086    | Pde6a     | 15562  | 61395715 | 61395915 |
| 18 | 61380153 | 61449373 + | NM_146086    | Pde6a     | 57522  | 61437675 | 61437875 |
| 18 | 61380153 | 61449373 + | NM_146086    | Pde6a     | -13    | 61379940 | 61380140 |
| 18 | 61457790 | 61560086 - | NM_133249    | Ppargc1b  | 16603  | 61543283 | 61543483 |
| 18 | 61457790 | 61560086 - | NM_133249    | Ppargc1b  | 68847  | 61491039 | 61491239 |
| 18 | 61457790 | 61560086 - | NM_133249    | Ppargc1b  | 45923  | 61513963 | 61514163 |
| 18 | 61457790 | 61560086 - | NM_133249    | Ppargc1b  | 72295  | 61487591 | 61487791 |
| 18 | 61799307 | 61807140 + | NR_045420    | Bvht      | -6954  | 61792153 | 61792353 |
| 18 | 61799307 | 61807140 + | NR_045420    | Bvht      | -2041  | 61797066 | 61797266 |
| 18 | 61856491 | 61867290 - | NM_172832    | Pcyox1l   | -248   | 61867538 | 61867738 |
| 18 | 62767194 | 62901042 - | NM_001168423 | Spink13   | 59776  | 62841066 | 62841266 |
| 18 | 63169867 | 63546838 - | NM_001039485 | Piezo2    | 370183 | 63176455 | 63176655 |
| 18 | 63868349 | 64149414 + | NM_001014981 | Wdr7      | 246355 | 64114704 | 64114904 |
| 18 | 63868349 | 64149414 + | NM_001014981 | Wdr7      | 247047 | 64115396 | 64115596 |
| 18 | 63868349 | 64149414 + | NM_001014981 | Wdr7      | -55    | 63868094 | 63868294 |
| 18 | 63868349 | 64149414 + | NM_001014981 | Wdr7      | 116354 | 63984703 | 63984903 |
| 18 | 64317378 | 64436835 - | NR_045366    | St8sia3os | 94251  | 64342384 | 64342584 |
| 18 | 64317378 | 64436835 - | NR_045366    | St8sia3os | 84796  | 64351839 | 64352039 |
| 18 | 64317378 | 64436835 - | NR_045366    | St8sia3os | 86405  | 64350230 | 64350430 |

|    |          |            |              |         |        |          |          |
|----|----------|------------|--------------|---------|--------|----------|----------|
| 18 | 64500018 | 64558143 + | NM_194268    | Onecut2 | 8447   | 64508465 | 64508665 |
| 18 | 64500018 | 64558143 + | NM_194268    | Onecut2 | 1989   | 64502007 | 64502207 |
| 18 | 64616204 | 64648721 - | NM_007998    | Fech    | 333    | 64648188 | 64648388 |
| 18 | 64659301 | 64676212 - | NM_001142950 | Nars    | 6883   | 64669129 | 64669329 |
| 18 | 64659301 | 64676212 - | NM_027350    | Nars    | 6883   | 64669129 | 64669329 |
| 18 | 64688633 | 64820655 - | NM_001001488 | Atp8b1  | 52206  | 64768249 | 64768449 |
| 18 | 64688633 | 64820655 - | NM_001001488 | Atp8b1  | 22346  | 64798109 | 64798309 |
| 18 | 64688633 | 64820655 - | NM_001001488 | Atp8b1  | -659   | 64821314 | 64821514 |
| 18 | 64688633 | 64820655 - | NM_001001488 | Atp8b1  | 4046   | 64816409 | 64816609 |
| 18 | 64688633 | 64820655 - | NM_001001488 | Atp8b1  | 28543  | 64791912 | 64792112 |
| 18 | 64688633 | 64820655 - | NM_001001488 | Atp8b1  | 23030  | 64797425 | 64797625 |
| 18 | 64688633 | 64820655 - | NM_001001488 | Atp8b1  | 35416  | 64785039 | 64785239 |
| 18 | 64688633 | 64820655 - | NM_001001488 | Atp8b1  | 95381  | 64725074 | 64725274 |
| 18 | 64688633 | 64820655 - | NM_001001488 | Atp8b1  | 82192  | 64738263 | 64738463 |
| 18 | 64688633 | 64820655 - | NM_001001488 | Atp8b1  | 76294  | 64744161 | 64744361 |
| 18 | 64688633 | 64820655 - | NM_001001488 | Atp8b1  | 92996  | 64727459 | 64727659 |
| 18 | 65047410 | 65377481 + | NM_001114386 | Nedd4l  | 90804  | 65138214 | 65138414 |
| 18 | 65047410 | 65377481 + | NM_001114386 | Nedd4l  | 183532 | 65230942 | 65231142 |
| 18 | 65047410 | 65377481 + | NM_001114386 | Nedd4l  | 112625 | 65160035 | 65160235 |
| 18 | 65047410 | 65377481 + | NM_001114386 | Nedd4l  | 101766 | 65149176 | 65149376 |
| 18 | 65047410 | 65377481 + | NM_001114386 | Nedd4l  | 69595  | 65117005 | 65117205 |
| 18 | 65047410 | 65377481 + | NM_001114386 | Nedd4l  | 72321  | 65119731 | 65119931 |
| 18 | 65047410 | 65377481 + | NM_001114386 | Nedd4l  | 22577  | 65069987 | 65070187 |
| 18 | 65183181 | 65377481 + | NM_031881    | Nedd4l  | 47761  | 65230942 | 65231142 |
| 18 | 65425186 | 65553543 - | NM_001037294 | Alpk2   | -3719  | 65557262 | 65557462 |
| 18 | 66140393 | 66162290 - | NM_027400    | Lman1   | 1578   | 66160512 | 66160712 |
| 18 | 66143341 | 66162290 - | NM_001172062 | Lman1   | 1578   | 66160512 | 66160712 |
| 18 | 66216510 | 66451493 - | NM_178793    | Ccbe1   | 22119  | 66429174 | 66429374 |
| 18 | 66663832 | 66671392 + | NR_040528    | Gm9926  | -9654  | 66653978 | 66654178 |
| 18 | 67247952 | 67386446 + | NM_177137    | Gnal    | 114213 | 67362165 | 67362365 |

|    |          |            |              |               |        |          |          |
|----|----------|------------|--------------|---------------|--------|----------|----------|
| 18 | 67247952 | 67386446 + | NM_177137    | Gnal          | 106365 | 67354317 | 67354517 |
| 18 | 67293214 | 67386446 + | NM_010307    | Gnal          | 68951  | 67362165 | 67362365 |
| 18 | 67293214 | 67386446 + | NM_010307    | Gnal          | 61103  | 67354317 | 67354517 |
| 18 | 67365013 | 67367542 + | NM_024190    | Chmp1b        | -2648  | 67362165 | 67362365 |
| 18 | 67480863 | 67503758 - | NR_033214    | B430212C06Rik | 19719  | 67483839 | 67484039 |
| 18 | 67564418 | 67608791 - | NM_027130    | Afg3l2        | 35450  | 67573141 | 67573341 |
| 18 | 67801253 | 67813817 + | NM_134138    | Psmg2         | 11950  | 67813203 | 67813403 |
| 18 | 67825155 | 67884276 - | NM_001127177 | Ptpn2         | 24025  | 67860051 | 67860251 |
| 18 | 67825155 | 67884276 - | NM_008977    | Ptpn2         | 24025  | 67860051 | 67860251 |
| 18 | 67934530 | 67955142 + | NM_001039088 | Seh1l         | 10552  | 67945082 | 67945282 |
| 18 | 67934530 | 67955142 + | NM_001039088 | Seh1l         | 630    | 67935160 | 67935360 |
| 18 | 67934530 | 67952248 + | NM_028112    | Seh1l         | 10552  | 67945082 | 67945282 |
| 18 | 67934530 | 67952248 + | NM_028112    | Seh1l         | 630    | 67935160 | 67935360 |
| 18 | 67935687 | 67959598 - | NR_045376    | 4930549G23Rik | 14316  | 67945082 | 67945282 |
| 18 | 67959761 | 68044825 + | NM_027556    | Cep192        | 76670  | 68036431 | 68036631 |
| 18 | 68092911 | 68415204 + | NM_172631    | Ldlrad4       | 226853 | 68319764 | 68319964 |
| 18 | 68419839 | 68459988 - | NM_153794    | Fam210a       | 949    | 68458839 | 68459039 |
| 18 | 68419839 | 68459988 - | NM_153794    | Fam210a       | 12427  | 68447361 | 68447561 |
| 18 | 68460009 | 68484507 + | NM_001170953 | Rnmt          | -970   | 68458839 | 68459039 |
| 18 | 68460009 | 68484507 + | NM_026440    | Rnmt          | -970   | 68458839 | 68459039 |
| 18 | 70085213 | 70129139 + | NM_201362    | Ccdc68        | -675   | 70084338 | 70084538 |
| 18 | 70727946 | 70742571 + | NM_001311071 | Mbd2          | 5753   | 70733699 | 70733899 |
| 18 | 70727946 | 70785786 + | NM_010773    | Mbd2          | 5753   | 70733699 | 70733899 |
| 18 | 73798667 | 73863396 - | NM_008540    | Smad4         | 30285  | 73832911 | 73833111 |
| 18 | 73798667 | 73863396 - | NM_008540    | Smad4         | -4608  | 73868004 | 73868204 |
| 18 | 73894692 | 73914134 - | NM_053255    | Elac1         | 369    | 73913565 | 73913765 |
| 18 | 73894692 | 73914134 - | NM_053255    | Elac1         | 17994  | 73895940 | 73896140 |
| 18 | 73894692 | 73914134 - | NM_053255    | Elac1         | 5393   | 73908541 | 73908741 |
| 18 | 73929694 | 73975047 - | NM_145494    | Me2           | 12917  | 73961930 | 73962130 |
| 18 | 73929694 | 73975047 - | NM_145494    | Me2           | 31188  | 73943659 | 73943859 |

|    |          |            |              |               |        |          |          |
|----|----------|------------|--------------|---------------|--------|----------|----------|
| 18 | 74088141 | 74224604 - | NM_172632    | Mapk4         | 48880  | 74175524 | 74175724 |
| 18 | 74177561 | 74179743 + | NR_045390    | D730045A05Rik | -1837  | 74175524 | 74175724 |
| 18 | 74427942 | 74442339 + | NM_013594    | Mbd1          | 400    | 74428342 | 74428542 |
| 18 | 74602273 | 74931132 + | NM_201600    | Myo5b         | 150025 | 74752298 | 74752498 |
| 18 | 74602273 | 74931132 + | NM_201600    | Myo5b         | 296785 | 74899058 | 74899258 |
| 18 | 74602273 | 74931132 + | NM_201600    | Myo5b         | 297293 | 74899566 | 74899766 |
| 18 | 74602273 | 74931132 + | NM_201600    | Myo5b         | 286675 | 74888948 | 74889148 |
| 18 | 74602273 | 74931132 + | NM_201600    | Myo5b         | 271403 | 74873676 | 74873876 |
| 18 | 74602273 | 74931132 + | NM_201600    | Myo5b         | 59347  | 74661620 | 74661820 |
| 18 | 74602273 | 74931132 + | NM_201600    | Myo5b         | 108977 | 74711250 | 74711450 |
| 18 | 74602273 | 74931132 + | NM_201600    | Myo5b         | 15418  | 74617691 | 74617891 |
| 18 | 74655332 | 74690779 - | NR_045368    | 1700120E14Rik | 28959  | 74661620 | 74661820 |
| 18 | 74938048 | 74938110 - | NR_028560    | Scarna17      | -6237  | 74944347 | 74944547 |
| 18 | 74938866 | 74965862 + | NM_177470    | Acaa2         | 5481   | 74944347 | 74944547 |
| 18 | 75098976 | 75120918 - | NM_010720    | Lipg          | 2110   | 75118608 | 75118808 |
| 18 | 75098976 | 75120918 - | NM_010720    | Lipg          | -2102  | 75123020 | 75123220 |
| 18 | 75178426 | 75446621 + | NM_027727    | Dym           | 111101 | 75289527 | 75289727 |
| 18 | 75178426 | 75446621 + | NM_027727    | Dym           | 211375 | 75389801 | 75390001 |
| 18 | 75448314 | 75456972 - | NR_045394    | 2010010A06Rik | -36    | 75457008 | 75457208 |
| 18 | 75455329 | 75456984 - | NR_045393    | 2010010A06Rik | -24    | 75457008 | 75457208 |
| 18 | 75527019 | 75555589 + | NM_001042660 | Smad7         | 21921  | 75548940 | 75549140 |
| 18 | 75527019 | 75555589 + | NM_001042660 | Smad7         | 18802  | 75545821 | 75546021 |
| 18 | 75590871 | 75857351 - | NM_201354    | Ctif          | 252870 | 75604281 | 75604481 |
| 18 | 75590871 | 75857351 - | NM_201354    | Ctif          | -191   | 75857542 | 75857742 |
| 18 | 75590871 | 75857351 - | NM_201354    | Ctif          | 99440  | 75757711 | 75757911 |
| 18 | 75590871 | 75857351 - | NM_201354    | Ctif          | 254402 | 75602749 | 75602949 |
| 18 | 75979832 | 76308219 + | NM_145356    | Zbtb7c        | 153945 | 76133777 | 76133977 |
| 18 | 77424586 | 77494190 + | NM_013666    | St8sia5       | 4137   | 77428723 | 77428923 |
| 18 | 77424586 | 77494190 + | NM_153124    | St8sia5       | 4137   | 77428723 | 77428923 |
| 18 | 77872020 | 77952750 - | NM_178670    | 8030462N17Rik | 73893  | 77878657 | 77878857 |

|    |          |            |              |         |        |          |          |
|----|----------|------------|--------------|---------|--------|----------|----------|
| 18 | 78033289 | 78121619 + | NM_013831    | Pstpip2 | 54816  | 78088105 | 78088305 |
| 18 | 78033289 | 78121619 + | NM_013831    | Pstpip2 | 84731  | 78118020 | 78118220 |
| 18 | 78033289 | 78121619 + | NM_013831    | Pstpip2 | 17401  | 78050690 | 78050890 |
| 18 | 78296830 | 78320166 - | NM_001171010 | Slc14a1 | -8195  | 78328361 | 78328561 |
| 18 | 78296830 | 78320166 - | NM_001171010 | Slc14a1 | 19524  | 78300442 | 78300642 |
| 18 | 78296830 | 78320166 - | NM_001171010 | Slc14a1 | -7748  | 78327914 | 78328114 |
| 18 | 78296830 | 78338859 - | NM_001171011 | Slc14a1 | 10298  | 78328361 | 78328561 |
| 18 | 78296830 | 78338859 - | NM_001171011 | Slc14a1 | 38217  | 78300442 | 78300642 |
| 18 | 78296830 | 78338859 - | NM_001171011 | Slc14a1 | 10745  | 78327914 | 78328114 |
| 18 | 78296830 | 78320166 - | NM_028122    | Slc14a1 | -8195  | 78328361 | 78328561 |
| 18 | 78296830 | 78320166 - | NM_028122    | Slc14a1 | 19524  | 78300442 | 78300642 |
| 18 | 78296830 | 78320166 - | NM_028122    | Slc14a1 | -7748  | 78327914 | 78328114 |
| 18 | 78342883 | 78793690 - | NM_207651    | Slc14a2 | 245390 | 78548100 | 78548300 |
| 18 | 78342883 | 78793690 - | NM_207651    | Slc14a2 | 271192 | 78522298 | 78522498 |
| 18 | 78379980 | 78793690 - | NM_030683    | Slc14a2 | 245390 | 78548100 | 78548300 |
| 18 | 78379980 | 78793690 - | NM_030683    | Slc14a2 | 271192 | 78522298 | 78522498 |
| 18 | 78947117 | 79306131 - | NM_053099    | Setbp1  | 86047  | 79219884 | 79220084 |
| 18 | 78947117 | 79306131 - | NM_053099    | Setbp1  | 82288  | 79223643 | 79223843 |
| 18 | 78947117 | 79306131 - | NM_053099    | Setbp1  | 128354 | 79177577 | 79177777 |
| 18 | 82644515 | 82755030 + | NM_010777    | Mbp     | 99354  | 82743869 | 82744069 |
| 18 | 82644515 | 82755030 + | NM_010777    | Mbp     | 93292  | 82737807 | 82738007 |
| 18 | 82644515 | 82755030 + | NM_010777    | Mbp     | 98596  | 82743111 | 82743311 |
| 18 | 82723855 | 82755030 + | NM_001025251 | Mbp     | 20014  | 82743869 | 82744069 |
| 18 | 82723855 | 82755030 + | NM_001025251 | Mbp     | 13952  | 82737807 | 82738007 |
| 18 | 82723855 | 82755030 + | NM_001025251 | Mbp     | 19256  | 82743111 | 82743311 |
| 18 | 82723855 | 82755030 + | NM_001025255 | Mbp     | 20014  | 82743869 | 82744069 |
| 18 | 82723855 | 82755030 + | NM_001025255 | Mbp     | 13952  | 82737807 | 82738007 |
| 18 | 82723855 | 82755030 + | NM_001025255 | Mbp     | 19256  | 82743111 | 82743311 |
| 18 | 82723855 | 82755030 + | NM_001025256 | Mbp     | 20014  | 82743869 | 82744069 |
| 18 | 82723855 | 82755030 + | NM_001025256 | Mbp     | 13952  | 82737807 | 82738007 |

|    |          |            |              |        |        |          |          |
|----|----------|------------|--------------|--------|--------|----------|----------|
| 18 | 82723855 | 82755030 + | NM_001025256 | Mbp    | 19256  | 82743111 | 82743311 |
| 18 | 82723855 | 82755030 + | NM_001025258 | Mbp    | 20014  | 82743869 | 82744069 |
| 18 | 82723855 | 82755030 + | NM_001025258 | Mbp    | 13952  | 82737807 | 82738007 |
| 18 | 82723855 | 82755030 + | NM_001025258 | Mbp    | 19256  | 82743111 | 82743311 |
| 18 | 82723855 | 82755030 + | NM_001025259 | Mbp    | 20014  | 82743869 | 82744069 |
| 18 | 82723855 | 82755030 + | NM_001025259 | Mbp    | 13952  | 82737807 | 82738007 |
| 18 | 82723855 | 82755030 + | NM_001025259 | Mbp    | 19256  | 82743111 | 82743311 |
| 18 | 82723900 | 82755030 + | NM_001025254 | Mbp    | 19969  | 82743869 | 82744069 |
| 18 | 82723900 | 82755030 + | NM_001025254 | Mbp    | 13907  | 82737807 | 82738007 |
| 18 | 82723900 | 82755030 + | NM_001025254 | Mbp    | 19211  | 82743111 | 82743311 |
| 18 | 84181019 | 84255955 - | NM_001081300 | Tshz1  | 15366  | 84240389 | 84240589 |
| 18 | 84377094 | 84758897 - | NM_001033341 | Zfp407 | 45732  | 84712965 | 84713165 |
| 18 | 84377094 | 84758897 - | NM_001033341 | Zfp407 | 220398 | 84538299 | 84538499 |
| 18 | 84836857 | 84851452 - | NM_001289531 | Cndp2  | -1550  | 84853002 | 84853202 |
| 18 | 84836857 | 84851452 - | NM_001289531 | Cndp2  | -2750  | 84854202 | 84854402 |
| 18 | 84836857 | 84851452 - | NM_001289531 | Cndp2  | 4544   | 84846708 | 84846908 |
| 18 | 84836857 | 84855095 - | NM_023149    | Cndp2  | 1893   | 84853002 | 84853202 |
| 18 | 84836857 | 84855095 - | NM_023149    | Cndp2  | 693    | 84854202 | 84854402 |
| 18 | 84836857 | 84855095 - | NM_023149    | Cndp2  | 8187   | 84846708 | 84846908 |
| 18 | 84889634 | 84909829 + | NM_173770    | Fam69c | 7163   | 84896797 | 84896997 |
| 18 | 85020806 | 85049256 + | NM_025797    | Cyb5a  | 16144  | 85036950 | 85037150 |
| 18 | 89141182 | 89300407 + | NM_175542    | Rttn   | 32436  | 89173618 | 89173818 |
| 18 | 90679546 | 90712660 + | NM_198295    | Tmx3   | 1920   | 90681466 | 90681666 |
| 18 | 90679546 | 90712660 + | NM_198295    | Tmx3   | 308    | 90679854 | 90680054 |
| 19 | 3323301  | 3385734 +  | NM_013495    | Cpt1a  | 10843  | 3334144  | 3334344  |
| 19 | 3323301  | 3385734 +  | NM_013495    | Cpt1a  | 51029  | 3374330  | 3374530  |
| 19 | 3323301  | 3385734 +  | NM_013495    | Cpt1a  | -4377  | 3318724  | 3318924  |
| 19 | 3323301  | 3385734 +  | NM_013495    | Cpt1a  | -1173  | 3321928  | 3322128  |
| 19 | 3454928  | 3575750 -  | NM_001164159 | Ppp6r3 | 29384  | 3546166  | 3546366  |
| 19 | 3454928  | 3575750 -  | NM_028999    | Ppp6r3 | 29384  | 3546166  | 3546366  |



|    |         |           |              |               |       |         |         |
|----|---------|-----------|--------------|---------------|-------|---------|---------|
| 19 | 3454928 | 3575750 - | NM_029456    | Ppp6r3        | 29384 | 3546166 | 3546366 |
| 19 | 3584825 | 3686565 - | NM_008513    | Lrp5          | 61475 | 3624890 | 3625090 |
| 19 | 3584825 | 3686565 - | NM_008513    | Lrp5          | 40549 | 3645816 | 3646016 |
| 19 | 3584825 | 3686565 - | NM_008513    | Lrp5          | 32123 | 3654242 | 3654442 |
| 19 | 3584825 | 3686565 - | NM_008513    | Lrp5          | 51444 | 3634921 | 3635121 |
| 19 | 3708333 | 3717882 + | NM_028077    | 1810055G02Rik | 692   | 3709025 | 3709225 |
| 19 | 3767421 | 3818304 + | NM_001167885 | Suv420h1      | 45927 | 3813348 | 3813548 |
| 19 | 3767421 | 3818304 + | NM_001167886 | Suv420h1      | 45927 | 3813348 | 3813548 |
| 19 | 3767421 | 3818304 + | NM_001167887 | Suv420h1      | 45927 | 3813348 | 3813548 |
| 19 | 3767421 | 3818304 + | NM_144871    | Suv420h1      | 45927 | 3813348 | 3813548 |
| 19 | 3958808 | 3970439 + | NM_028545    | Aldh3b3       | -2403 | 3956205 | 3956405 |
| 19 | 4000580 | 4002103 + | NM_025529    | Nudt8         | -675  | 3999705 | 3999905 |
| 19 | 4003385 | 4007006 + | NM_021791    | Doc2g         | -3480 | 3999705 | 3999905 |
| 19 | 4057487 | 4059295 - | NM_144869    | BC021614      | -9331 | 4068626 | 4068826 |
| 19 | 4082488 | 4087340 + | NM_001160253 | Cabp2         | -7442 | 4074846 | 4075046 |
| 19 | 4083519 | 4087340 + | NM_001160252 | Cabp2         | -8473 | 4074846 | 4075046 |
| 19 | 4083519 | 4087340 + | NM_013878    | Cabp2         | -8473 | 4074846 | 4075046 |
| 19 | 4099998 | 4113966 + | NR_075078    | Pitpnm1       | 13371 | 4113369 | 4113569 |
| 19 | 4100622 | 4113966 + | NM_008851    | Pitpnm1       | 12747 | 4113369 | 4113569 |
| 19 | 4263818 | 4263879 - | NR_105951    | Mir6985       | 2233  | 4261446 | 4261646 |
| 19 | 4316147 | 4397078 - | NM_001001984 | Kdm2a         | 66493 | 4330385 | 4330585 |
| 19 | 4316147 | 4397078 - | NM_001001984 | Kdm2a         | 65512 | 4331366 | 4331566 |
| 19 | 4425457 | 4439425 - | NM_007485    | Rhod          | 2884  | 4436341 | 4436541 |
| 19 | 4425457 | 4439425 - | NM_007485    | Rhod          | -1834 | 4441259 | 4441459 |
| 19 | 4439323 | 4448326 + | NR_045990    | A930001C03Rik | -2782 | 4436341 | 4436541 |
| 19 | 4439323 | 4448326 + | NR_045990    | A930001C03Rik | 1936  | 4441259 | 4441459 |
| 19 | 4439559 | 4448326 + | NR_045989    | A930001C03Rik | -3018 | 4436341 | 4436541 |
| 19 | 4439559 | 4448326 + | NR_045989    | A930001C03Rik | 1700  | 4441259 | 4441459 |
| 19 | 4445908 | 4477144 - | NM_134164    | Syt12         | -309  | 4477453 | 4477653 |
| 19 | 4445908 | 4477144 - | NM_134164    | Syt12         | -805  | 4477949 | 4478149 |

|    |         |           |              |               |       |         |         |
|----|---------|-----------|--------------|---------------|-------|---------|---------|
| 19 | 4496788 | 4498584 - | NM_027237    | 2010003K11Rik | -6345 | 4504929 | 4505129 |
| 19 | 4510472 | 4621753 + | NM_001162946 | Pcx           | -5343 | 4504929 | 4505129 |
| 19 | 4625841 | 4698669 - | NM_001033447 | Gm960         | 27549 | 4670920 | 4671120 |
| 19 | 4861216 | 4877910 - | NM_013456    | Actn3         | -1101 | 4879011 | 4879211 |
| 19 | 4878668 | 4885398 + | NM_001168516 | Zdhhc24       | 343   | 4879011 | 4879211 |
| 19 | 4878668 | 4885398 + | NM_027476    | Zdhhc24       | 343   | 4879011 | 4879211 |
| 19 | 4878690 | 4885398 + | NM_001168517 | Zdhhc24       | 321   | 4879011 | 4879211 |
| 19 | 4907229 | 4928288 - | NM_133803    | Dpp3          | 4016  | 4924072 | 4924272 |
| 19 | 4962306 | 4966996 + | NM_025553    | Mrpl11        | -185  | 4961921 | 4962121 |
| 19 | 5079337 | 5085478 - | NM_001001885 | Tmem151a      | -8726 | 5094204 | 5094404 |
| 19 | 5092868 | 5098522 - | NM_001302333 | Cnih2         | 4118  | 5094204 | 5094404 |
| 19 | 5092868 | 5098522 - | NM_009920    | Cnih2         | 4118  | 5094204 | 5094404 |
| 19 | 5133685 | 5273120 - | NM_153129    | Pacs1         | 77179 | 5195741 | 5195941 |
| 19 | 5344705 | 5349575 - | NM_028623    | Cst6          | -4139 | 5353714 | 5353914 |
| 19 | 5364633 | 5366364 - | NM_001038231 | Banf1         | -8539 | 5374903 | 5375103 |
| 19 | 5364633 | 5366364 - | NM_001038231 | Banf1         | -7905 | 5374269 | 5374469 |
| 19 | 5364633 | 5366877 - | NM_001286608 | Banf1         | -8026 | 5374903 | 5375103 |
| 19 | 5364633 | 5366877 - | NM_001286608 | Banf1         | -7392 | 5374269 | 5374469 |
| 19 | 5364633 | 5366877 - | NM_011793    | Banf1         | -8026 | 5374903 | 5375103 |
| 19 | 5364633 | 5366877 - | NM_011793    | Banf1         | -7392 | 5374269 | 5374469 |
| 19 | 5364633 | 5366877 - | NR_104482    | Banf1         | -8026 | 5374903 | 5375103 |
| 19 | 5364633 | 5366877 - | NR_104482    | Banf1         | -7392 | 5374269 | 5374469 |
| 19 | 5495278 | 5510490 - | NM_001024560 | Snx32         | -5833 | 5516323 | 5516523 |
| 19 | 5495278 | 5510490 - | NM_001024560 | Snx32         | 9927  | 5500363 | 5500563 |
| 19 | 5549137 | 5560576 - | NM_019935    | Ovol1         | 1593  | 5558783 | 5558983 |
| 19 | 5549137 | 5560576 - | NM_019935    | Ovol1         | -1825 | 5562401 | 5562601 |
| 19 | 5549137 | 5560576 - | NM_019935    | Ovol1         | 5151  | 5555225 | 5555425 |
| 19 | 5568074 | 5571262 + | NM_001033448 | Ap5b1         | -9091 | 5558783 | 5558983 |
| 19 | 5568074 | 5571262 + | NM_001033448 | Ap5b1         | -5473 | 5562401 | 5562601 |
| 19 | 5707374 | 5726318 - | NM_001114595 | Ehbp1l1       | 3081  | 5723037 | 5723237 |

|    |         |           |              |          |       |         |         |
|----|---------|-----------|--------------|----------|-------|---------|---------|
| 19 | 5707374 | 5726318 - | NM_001114595 | Ehbp1l1  | -809  | 5727127 | 5727327 |
| 19 | 5707374 | 5726318 - | NM_001114595 | Ehbp1l1  | 1600  | 5724518 | 5724718 |
| 19 | 5707374 | 5726318 - | NM_001114596 | Ehbp1l1  | 3081  | 5723037 | 5723237 |
| 19 | 5707374 | 5726318 - | NM_001114596 | Ehbp1l1  | -809  | 5727127 | 5727327 |
| 19 | 5707374 | 5726318 - | NM_001114596 | Ehbp1l1  | 1600  | 5724518 | 5724718 |
| 19 | 5707374 | 5726318 - | NM_001114597 | Ehbp1l1  | 3081  | 5723037 | 5723237 |
| 19 | 5707374 | 5726318 - | NM_001114597 | Ehbp1l1  | -809  | 5727127 | 5727327 |
| 19 | 5707374 | 5726318 - | NM_001114597 | Ehbp1l1  | 1600  | 5724518 | 5724718 |
| 19 | 5707374 | 5726318 - | NM_053252    | Ehbp1l1  | 3081  | 5723037 | 5723237 |
| 19 | 5707374 | 5726318 - | NM_053252    | Ehbp1l1  | -809  | 5727127 | 5727327 |
| 19 | 5707374 | 5726318 - | NM_053252    | Ehbp1l1  | 1600  | 5724518 | 5724718 |
| 19 | 5728087 | 5729667 - | NM_023166    | Fam89b   | 2340  | 5727127 | 5727327 |
| 19 | 5728087 | 5729667 - | NM_181452    | Fam89b   | 2340  | 5727127 | 5727327 |
| 19 | 5795690 | 5802672 - | NR_002847    | Malat1   | 122   | 5802350 | 5802550 |
| 19 | 5795690 | 5802672 - | NR_002847    | Malat1   | 3245  | 5799227 | 5799427 |
| 19 | 5824710 | 5845479 - | NR_131212    | Neat1    | 952   | 5844327 | 5844527 |
| 19 | 5842296 | 5845481 - | NR_003513    | Neat1    | 954   | 5844327 | 5844527 |
| 19 | 5850974 | 5875209 - | NM_026169    | Frmd8    | -8852 | 5884061 | 5884261 |
| 19 | 5850974 | 5875209 - | NM_026169    | Frmd8    | -5748 | 5880957 | 5881157 |
| 19 | 5878466 | 5885769 + | NM_134154    | Slc25a45 | 5595  | 5884061 | 5884261 |
| 19 | 5878466 | 5885769 + | NM_134154    | Slc25a45 | 2491  | 5880957 | 5881157 |
| 19 | 5896516 | 5912872 - | NM_001291078 | Dpf2     | -3629 | 5916501 | 5916701 |
| 19 | 5896516 | 5912872 - | NM_011262    | Dpf2     | -3629 | 5916501 | 5916701 |
| 19 | 5940543 | 5964207 - | NM_008893    | Pola2    | 5757  | 5958250 | 5958450 |
| 19 | 5940543 | 5964207 - | NM_008893    | Pola2    | 7589  | 5956418 | 5956618 |
| 19 | 5940543 | 5964207 - | NM_008893    | Pola2    | 6144  | 5957863 | 5958063 |
| 19 | 5940543 | 5964207 - | NM_008893    | Pola2    | 8290  | 5955717 | 5955917 |
| 19 | 5941105 | 5964207 - | NM_001164057 | Pola2    | 5757  | 5958250 | 5958450 |
| 19 | 5941105 | 5964207 - | NM_001164057 | Pola2    | 7589  | 5956418 | 5956618 |
| 19 | 5941105 | 5964207 - | NM_001164057 | Pola2    | 6144  | 5957863 | 5958063 |

|    |         |           |              |               |       |         |         |
|----|---------|-----------|--------------|---------------|-------|---------|---------|
| 19 | 5941105 | 5964207 - | NM_001164057 | Pola2         | 8290  | 5955717 | 5955917 |
| 19 | 5988545 | 6015826 - | NM_001110504 | Capn1         | 341   | 6015285 | 6015485 |
| 19 | 5988545 | 6015248 - | NM_007600    | Capn1         | -37   | 6015285 | 6015485 |
| 19 | 6012620 | 6018460 + | NR_045783    | Gm10814       | 2665  | 6015285 | 6015485 |
| 19 | 6046576 | 6053719 + | NM_028769    | Syvn1         | -8731 | 6037645 | 6037845 |
| 19 | 6046576 | 6053719 + | NM_028769    | Syvn1         | -7092 | 6039284 | 6039484 |
| 19 | 6046576 | 6053719 + | NM_028769    | Syvn1         | -7855 | 6038521 | 6038721 |
| 19 | 6047145 | 6053719 + | NM_001164709 | Syvn1         | -9300 | 6037645 | 6037845 |
| 19 | 6047145 | 6053719 + | NM_001164709 | Syvn1         | -7661 | 6039284 | 6039484 |
| 19 | 6047145 | 6053719 + | NM_001164709 | Syvn1         | -8424 | 6038521 | 6038721 |
| 19 | 6053630 | 6057752 - | NM_026246    | Mrpl49        | 3061  | 6054491 | 6054691 |
| 19 | 6057888 | 6059525 + | NM_001160239 | Fau           | -3197 | 6054491 | 6054691 |
| 19 | 6057888 | 6059525 + | NM_007990    | Fau           | -3197 | 6054491 | 6054691 |
| 19 | 6057967 | 6059525 + | NM_001190436 | Fau           | -3276 | 6054491 | 6054691 |
| 19 | 6061207 | 6062469 + | NM_013859    | Znhit2        | -6516 | 6054491 | 6054691 |
| 19 | 6062821 | 6067851 - | NM_028454    | Tm7sf2        | -8929 | 6076780 | 6076980 |
| 19 | 6067842 | 6077188 - | NM_001081041 | Vps51         | 208   | 6076780 | 6076980 |
| 19 | 6067842 | 6077188 - | NM_001081041 | Vps51         | -5163 | 6082351 | 6082551 |
| 19 | 6080038 | 6080786 + | NM_001111317 | BC048609      | -3058 | 6076780 | 6076980 |
| 19 | 6080038 | 6080786 + | NM_001111317 | BC048609      | 2313  | 6082351 | 6082551 |
| 19 | 6080763 | 6084892 - | NM_024231    | Zfpl1         | 2341  | 6082351 | 6082551 |
| 19 | 6085097 | 6091774 + | NM_026410    | Cdca5         | -8117 | 6076780 | 6076980 |
| 19 | 6085097 | 6091774 + | NM_026410    | Cdca5         | -2546 | 6082351 | 6082551 |
| 19 | 6105798 | 6115556 + | NM_001009546 | Naaladl1      | -1023 | 6104575 | 6104775 |
| 19 | 6164458 | 6172476 + | NM_028967    | Batf2         | -322  | 6163936 | 6164136 |
| 19 | 6184410 | 6224220 + | NM_001165919 | 1700123I01Rik | 19919 | 6204329 | 6204529 |
| 19 | 6264643 | 6264729 + | NR_029830    | Mir194-2      | -111  | 6264332 | 6264532 |
| 19 | 6264844 | 6264933 + | NR_029720    | Mir192        | -312  | 6264332 | 6264532 |
| 19 | 6276896 | 6300097 + | NM_010119    | Ehd1          | 8812  | 6285708 | 6285908 |
| 19 | 6276896 | 6300097 + | NM_010119    | Ehd1          | 16887 | 6293783 | 6293983 |

|    |         |           |              |               |       |         |         |
|----|---------|-----------|--------------|---------------|-------|---------|---------|
| 19 | 6276896 | 6300097 + | NM_010119    | Ehd1          | 7585  | 6284481 | 6284681 |
| 19 | 6981309 | 6984136 - | NM_012021    | Prdx5         | -8689 | 6992825 | 6993025 |
| 19 | 6985467 | 6996299 - | NM_007953    | Esrra         | 3274  | 6992825 | 6993025 |
| 19 | 6988686 | 6988777 - | NR_105956    | Mir6990       | -4048 | 6992825 | 6993025 |
| 19 | 7012560 | 7016941 - | NM_001177361 | Gpr137        | -9525 | 7026466 | 7026666 |
| 19 | 7028203 | 7044305 - | NM_001290349 | Plcb3         | 927   | 7043178 | 7043378 |
| 19 | 7028203 | 7044305 - | NM_001290349 | Plcb3         | -998  | 7045303 | 7045503 |
| 19 | 7028203 | 7044305 - | NM_008874    | Plcb3         | 927   | 7043178 | 7043378 |
| 19 | 7028203 | 7044305 - | NM_008874    | Plcb3         | -998  | 7045303 | 7045503 |
| 19 | 7049538 | 7051815 + | NM_008889    | Ppp1r14b      | -6160 | 7043178 | 7043378 |
| 19 | 7049538 | 7051815 + | NM_008889    | Ppp1r14b      | -4035 | 7045303 | 7045503 |
| 19 | 7272696 | 7280775 - | NM_134150    | Otub1         | -130  | 7280905 | 7281105 |
| 19 | 7349886 | 7416351 - | NM_001080388 | Mark2         | 33138 | 7383013 | 7383213 |
| 19 | 7349886 | 7416351 - | NM_001080388 | Mark2         | 46112 | 7370039 | 7370239 |
| 19 | 7349886 | 7416351 - | NM_001080389 | Mark2         | 33138 | 7383013 | 7383213 |
| 19 | 7349886 | 7416351 - | NM_001080389 | Mark2         | 46112 | 7370039 | 7370239 |
| 19 | 7349886 | 7369938 - | NM_001080390 | Mark2         | -101  | 7370039 | 7370239 |
| 19 | 7349886 | 7416351 - | NM_007928    | Mark2         | 33138 | 7383013 | 7383213 |
| 19 | 7349886 | 7416351 - | NM_007928    | Mark2         | 46112 | 7370039 | 7370239 |
| 19 | 7568530 | 7613100 + | NM_001163505 | Atl3          | -49   | 7568281 | 7568481 |
| 19 | 7568928 | 7613100 + | NM_146091    | Atl3          | -447  | 7568281 | 7568481 |
| 19 | 7631949 | 7663036 + | NM_139269    | Pla2g16       | 21189 | 7653138 | 7653338 |
| 19 | 7631949 | 7663036 + | NM_139269    | Pla2g16       | 2161  | 7634110 | 7634310 |
| 19 | 8781372 | 8797860 - | NM_001161413 | Slc3a2        | 7886  | 8789774 | 8789974 |
| 19 | 8781372 | 8788388 - | NM_008577    | Slc3a2        | -1386 | 8789774 | 8789974 |
| 19 | 8797977 | 8800817 + | NR_002896    | Snhg1         | -8003 | 8789774 | 8789974 |
| 19 | 8810329 | 8815115 + | NM_134139    | Wdr74         | -756  | 8809373 | 8809573 |
| 19 | 8815208 | 8815716 + | NM_001177347 | 1700092M07Rik | -5635 | 8809373 | 8809573 |
| 19 | 8815914 | 8830133 + | NM_001167799 | Stx5a         | 4023  | 8819937 | 8820137 |
| 19 | 8815914 | 8830133 + | NM_001167799 | Stx5a         | -6341 | 8809373 | 8809573 |

|    |          |            |              |          |       |          |          |
|----|----------|------------|--------------|----------|-------|----------|----------|
| 19 | 8816293  | 8830133 +  | NM_019829    | Stx5a    | 3644  | 8819937  | 8820137  |
| 19 | 8816293  | 8830133 +  | NM_019829    | Stx5a    | -6720 | 8809373  | 8809573  |
| 19 | 8817461  | 8817570 +  | NR_105958    | Mir6992  | 2476  | 8819937  | 8820137  |
| 19 | 8817461  | 8817570 +  | NR_105958    | Mir6992  | -7888 | 8809373  | 8809573  |
| 19 | 8847012  | 8848958 -  | NM_026325    | Tmem179b | -6637 | 8855595  | 8855795  |
| 19 | 8847012  | 8848958 -  | NR_028418    | Tmem179b | -6637 | 8855595  | 8855795  |
| 19 | 8847012  | 8848958 -  | NR_028419    | Tmem179b | -6637 | 8855595  | 8855795  |
| 19 | 8848844  | 8860908 -  | NM_001177798 | Taf6l    | 5113  | 8855595  | 8855795  |
| 19 | 8848844  | 8860807 -  | NM_146092    | Taf6l    | 5012  | 8855595  | 8855795  |
| 19 | 9028340  | 9040701 +  | NM_197993    | Tut1     | -442  | 9027698  | 9027898  |
| 19 | 9063774  | 9151417 +  | NM_001039959 | Ahnak    | 58439 | 9122213  | 9122413  |
| 19 | 9063774  | 9151417 +  | NM_001039959 | Ahnak    | 50082 | 9113856  | 9114056  |
| 19 | 9063774  | 9151417 +  | NM_001286518 | Ahnak    | 58439 | 9122213  | 9122413  |
| 19 | 9063774  | 9151417 +  | NM_001286518 | Ahnak    | 50082 | 9113856  | 9114056  |
| 19 | 9063774  | 9151417 +  | NR_104460    | Ahnak    | 58439 | 9122213  | 9122413  |
| 19 | 9063774  | 9151417 +  | NR_104460    | Ahnak    | 50082 | 9113856  | 9114056  |
| 19 | 10055090 | 10059602 + | NR_073181    | Fth1     | 2731  | 10057821 | 10058021 |
| 19 | 10055090 | 10059602 + | NR_073181    | Fth1     | -3220 | 10051670 | 10051870 |
| 19 | 10055090 | 10059602 + | NR_073181    | Fth1     | -3921 | 10050969 | 10051169 |
| 19 | 10057136 | 10059602 + | NM_010239    | Fth1     | 685   | 10057821 | 10058021 |
| 19 | 10057136 | 10059602 + | NM_010239    | Fth1     | -5266 | 10051670 | 10051870 |
| 19 | 10057136 | 10059602 + | NM_010239    | Fth1     | -5967 | 10050969 | 10051169 |
| 19 | 10092718 | 10110077 + | NM_144538    | Rab3il1  | -3110 | 10089408 | 10089608 |
| 19 | 10116038 | 10134162 + | NM_021890    | Fads3    | 11967 | 10128005 | 10128205 |
| 19 | 10138654 | 10175994 - | NM_019699    | Fads2    | 35564 | 10140230 | 10140430 |
| 19 | 10257378 | 10271363 + | NM_146094    | Fads1    | 8201  | 10265579 | 10265779 |
| 19 | 10265865 | 10265930 + | NR_105959    | Mir6993  | -86   | 10265579 | 10265779 |
| 19 | 10282761 | 10315239 - | NM_001033481 | Myrf     | 4654  | 10310385 | 10310585 |
| 19 | 10319755 | 10379368 - | NM_198114    | Dagla    | 4197  | 10374971 | 10375171 |
| 19 | 10575002 | 10599700 - | NM_025333    | Sdhaf2   | -5511 | 10605211 | 10605411 |

|    |          |            |              |               |        |          |          |
|----|----------|------------|--------------|---------------|--------|----------|----------|
| 19 | 10599734 | 10622226 + | NM_001164272 | Cpsf7         | 5477   | 10605211 | 10605411 |
| 19 | 10599734 | 10622226 + | NM_172302    | Cpsf7         | 5477   | 10605211 | 10605411 |
| 19 | 10708723 | 10739701 + | NM_027913    | Vwce          | 22845  | 10731568 | 10731768 |
| 19 | 10708723 | 10739701 + | NM_027913    | Vwce          | 23592  | 10732315 | 10732515 |
| 19 | 10708723 | 10739701 + | NM_027913    | Vwce          | 4060   | 10712783 | 10712983 |
| 19 | 10720184 | 10722544 - | NR_045316    | 4930524O05Rik | -9024  | 10731568 | 10731768 |
| 19 | 10720184 | 10722544 - | NR_045316    | 4930524O05Rik | -9771  | 10732315 | 10732515 |
| 19 | 10743447 | 10752562 - | NM_021453    | Pga5          | 1813   | 10750549 | 10750749 |
| 19 | 10759283 | 10760047 + | NR_131163    | 2210404E10Rik | -8534  | 10750549 | 10750749 |
| 19 | 10988787 | 10995092 - | NM_009580    | Zp1           | -5716  | 11000808 | 11001008 |
| 19 | 11011650 | 11017002 + | NM_009962    | Ptgdr2        | 1690   | 11013340 | 11013540 |
| 19 | 11036785 | 11049161 - | NM_023529    | Ms4a10        | 3945   | 11045016 | 11045216 |
| 19 | 11036785 | 11049161 - | NM_023529    | Ms4a10        | 0      | 11049076 | 11049276 |
| 19 | 11071515 | 11092454 - | NM_001251849 | Ms4a18        | 2226   | 11090028 | 11090228 |
| 19 | 11122102 | 11125057 - | NR_102366    | AW112010      | -3493  | 11128550 | 11128750 |
| 19 | 11122102 | 11125057 - | NR_102366    | AW112010      | -1913  | 11126970 | 11127170 |
| 19 | 11141961 | 11155594 - | NM_022430    | Ms4a8a        | 3553   | 11151841 | 11152041 |
| 19 | 11141961 | 11155594 - | NM_022430    | Ms4a8a        | 9428   | 11145966 | 11146166 |
| 19 | 11844905 | 11849437 + | NM_025606    | Mrpl16        | -1802  | 11842903 | 11843103 |
| 19 | 11849608 | 11893894 - | NM_001025307 | Stx3          | -456   | 11894350 | 11894550 |
| 19 | 11849608 | 11893894 - | NM_001286543 | Stx3          | -456   | 11894350 | 11894550 |
| 19 | 11849608 | 11893894 - | NM_011502    | Stx3          | -456   | 11894350 | 11894550 |
| 19 | 11851975 | 11893894 - | NM_152220    | Stx3          | -456   | 11894350 | 11894550 |
| 19 | 12748669 | 12749734 + | NM_146697    | Olfr1442      | 2839   | 12751508 | 12751708 |
| 19 | 12752656 | 12758336 + | NM_146698    | Olfr1443      | -948   | 12751508 | 12751708 |
| 19 | 12838018 | 12870614 - | NR_024093    | Zfp91Cntf     | -474   | 12871088 | 12871288 |
| 19 | 12841429 | 12870614 - | NM_053009    | Zfp91         | -474   | 12871088 | 12871288 |
| 19 | 12873099 | 12908299 + | NM_134152    | Lpxn          | 21287  | 12894386 | 12894586 |
| 19 | 12873099 | 12908299 + | NM_134152    | Lpxn          | -1811  | 12871088 | 12871288 |
| 19 | 14522562 | 14672674 - | NM_001302947 | Tle4          | 115906 | 14556568 | 14556768 |

|    |          |            |              |        |        |          |          |
|----|----------|------------|--------------|--------|--------|----------|----------|
| 19 | 14522562 | 14672674 - | NM_001302947 | Tle4   | 83064  | 14589410 | 14589610 |
| 19 | 14522562 | 14672674 - | NM_001302947 | Tle4   | 72258  | 14600216 | 14600416 |
| 19 | 14522562 | 14672674 - | NM_001302947 | Tle4   | 102332 | 14570142 | 14570342 |
| 19 | 14522562 | 14672674 - | NM_001302947 | Tle4   | 104883 | 14567591 | 14567791 |
| 19 | 14522562 | 14672674 - | NM_001302950 | Tle4   | 115906 | 14556568 | 14556768 |
| 19 | 14522562 | 14672674 - | NM_001302950 | Tle4   | 83064  | 14589410 | 14589610 |
| 19 | 14522562 | 14672674 - | NM_001302950 | Tle4   | 72258  | 14600216 | 14600416 |
| 19 | 14522562 | 14672674 - | NM_001302950 | Tle4   | 102332 | 14570142 | 14570342 |
| 19 | 14522562 | 14672674 - | NM_001302950 | Tle4   | 104883 | 14567591 | 14567791 |
| 19 | 14522562 | 14671704 - | NM_001302951 | Tle4   | 114936 | 14556568 | 14556768 |
| 19 | 14522562 | 14671704 - | NM_001302951 | Tle4   | 82094  | 14589410 | 14589610 |
| 19 | 14522562 | 14671704 - | NM_001302951 | Tle4   | 71288  | 14600216 | 14600416 |
| 19 | 14522562 | 14671704 - | NM_001302951 | Tle4   | 101362 | 14570142 | 14570342 |
| 19 | 14522562 | 14671704 - | NM_001302951 | Tle4   | 103913 | 14567591 | 14567791 |
| 19 | 14522562 | 14672674 - | NM_011600    | Tle4   | 115906 | 14556568 | 14556768 |
| 19 | 14522562 | 14672674 - | NM_011600    | Tle4   | 83064  | 14589410 | 14589610 |
| 19 | 14522562 | 14672674 - | NM_011600    | Tle4   | 72258  | 14600216 | 14600416 |
| 19 | 14522562 | 14672674 - | NM_011600    | Tle4   | 102332 | 14570142 | 14570342 |
| 19 | 14522562 | 14672674 - | NM_011600    | Tle4   | 104883 | 14567591 | 14567791 |
| 19 | 15979613 | 15999113 - | NM_001205339 | Psat1  | -7268  | 16006381 | 16006581 |
| 19 | 15979613 | 15999113 - | NM_001205339 | Psat1  | -460   | 15999573 | 15999773 |
| 19 | 15979613 | 15999550 - | NM_177420    | Psat1  | -6831  | 16006381 | 16006581 |
| 19 | 15979613 | 15999550 - | NM_177420    | Psat1  | -23    | 15999573 | 15999773 |
| 19 | 16207321 | 16461944 + | NM_008139    | Gnaq   | 208017 | 16415338 | 16415538 |
| 19 | 16207321 | 16461944 + | NM_008139    | Gnaq   | 243127 | 16450448 | 16450648 |
| 19 | 16207321 | 16461944 + | NM_008139    | Gnaq   | 125926 | 16333247 | 16333447 |
| 19 | 16689856 | 16855424 - | NM_173028    | Vps13a | 121280 | 16733944 | 16734144 |
| 19 | 17506804 | 17912123 - | NM_001190483 | Pcsk5  | 124012 | 17787911 | 17788111 |
| 19 | 17506804 | 17912123 - | NM_001190483 | Pcsk5  | 61406  | 17850517 | 17850717 |
| 19 | 17506804 | 17912123 - | NM_001190483 | Pcsk5  | 26001  | 17885922 | 17886122 |



|    |          |            |              |               |        |          |          |
|----|----------|------------|--------------|---------------|--------|----------|----------|
| 19 | 17506804 | 17912123 - | NM_001190483 | Pcsk5         | 92981  | 17818942 | 17819142 |
| 19 | 17506804 | 17912123 - | NM_001190483 | Pcsk5         | 147846 | 17764077 | 17764277 |
| 19 | 17506804 | 17912123 - | NM_001190483 | Pcsk5         | 134643 | 17777280 | 17777480 |
| 19 | 17506804 | 17912123 - | NM_001190483 | Pcsk5         | 308597 | 17603326 | 17603526 |
| 19 | 17632649 | 17912123 - | NM_001163144 | Pcsk5         | 124012 | 17787911 | 17788111 |
| 19 | 17632649 | 17912123 - | NM_001163144 | Pcsk5         | 61406  | 17850517 | 17850717 |
| 19 | 17632649 | 17912123 - | NM_001163144 | Pcsk5         | 26001  | 17885922 | 17886122 |
| 19 | 17632649 | 17912123 - | NM_001163144 | Pcsk5         | 92981  | 17818942 | 17819142 |
| 19 | 17632649 | 17912123 - | NM_001163144 | Pcsk5         | 147846 | 17764077 | 17764277 |
| 19 | 17632649 | 17912123 - | NM_001163144 | Pcsk5         | 134643 | 17777280 | 17777480 |
| 19 | 18654854 | 18706304 - | NM_017375    | Ostf1         | 7106   | 18698998 | 18699198 |
| 19 | 18706506 | 18726675 + | NM_145497    | Nmrk1         | -7308  | 18698998 | 18699198 |
| 19 | 18824473 | 18967002 + | NM_153417    | Trpm6         | 70052  | 18894525 | 18894725 |
| 19 | 18824473 | 18967002 + | NM_153417    | Trpm6         | 75177  | 18899650 | 18899850 |
| 19 | 18824473 | 18967002 + | NM_153417    | Trpm6         | -188   | 18824085 | 18824285 |
| 19 | 18824473 | 18967002 + | NM_153417    | Trpm6         | 11635  | 18836108 | 18836308 |
| 19 | 19005099 | 19185687 - | NM_001043354 | Rorb          | 162199 | 19023288 | 19023488 |
| 19 | 19005099 | 19075608 - | NM_001289921 | Rorb          | 52120  | 19023288 | 19023488 |
| 19 | 19005099 | 19075608 - | NM_146095    | Rorb          | 52120  | 19023288 | 19023488 |
| 19 | 20479778 | 20497276 + | NR_045817    | 1500015L24Rik | 4970   | 20484748 | 20484948 |
| 19 | 20567205 | 20630901 + | NR_015502    | E030003E18Rik | 59761  | 20626966 | 20627166 |
| 19 | 20609017 | 20626821 - | NR_045778    | C730002L08Rik | -6641  | 20633462 | 20633662 |
| 19 | 20609017 | 20626821 - | NR_045778    | C730002L08Rik | -145   | 20626966 | 20627166 |
| 19 | 20676472 | 20717953 + | NM_013467    | Aldh1a1       | 29145  | 20705617 | 20705817 |
| 19 | 21346768 | 21361331 + | NM_009551    | Zfand5        | 2165   | 21348933 | 21349133 |
| 19 | 23215716 | 23241402 + | NM_010638    | Klf9          | 11218  | 23226934 | 23227134 |
| 19 | 23761890 | 23795620 + | NM_028208    | Ptar1         | 8550   | 23770440 | 23770640 |
| 19 | 24047240 | 24105510 - | NM_001114174 | Fam189a2      | 7796   | 24097514 | 24097714 |
| 19 | 24168992 | 24248631 - | NM_001198985 | Tjp2          | 7464   | 24240967 | 24241167 |
| 19 | 24168992 | 24299517 - | NM_011597    | Tjp2          | -4281  | 24303798 | 24303998 |

|    |          |            |              |               |        |          |          |
|----|----------|------------|--------------|---------------|--------|----------|----------|
| 19 | 24168992 | 24299517 - | NM_011597    | Tjp2          | 58350  | 24240967 | 24241167 |
| 19 | 24335943 | 24355077 - | NM_008044    | Fxn           | 8943   | 24345934 | 24346134 |
| 19 | 24335943 | 24355077 - | NM_008044    | Fxn           | 14266  | 24340611 | 24340811 |
| 19 | 24369286 | 24630318 - | NM_008846    | Pip5k1b       | 35815  | 24594303 | 24594503 |
| 19 | 24369286 | 24630318 - | NM_008846    | Pip5k1b       | 1579   | 24628539 | 24628739 |
| 19 | 24369286 | 24630318 - | NM_008846    | Pip5k1b       | 26603  | 24603515 | 24603715 |
| 19 | 24369286 | 24630318 - | NM_008846    | Pip5k1b       | 11692  | 24618426 | 24618626 |
| 19 | 24369286 | 24630318 - | NM_008846    | Pip5k1b       | 27520  | 24602598 | 24602798 |
| 19 | 24369286 | 24630318 - | NM_008846    | Pip5k1b       | 98240  | 24531878 | 24532078 |
| 19 | 24369286 | 24630318 - | NM_008846    | Pip5k1b       | 40643  | 24589475 | 24589675 |
| 19 | 24369286 | 24630318 - | NM_008846    | Pip5k1b       | 38443  | 24591675 | 24591875 |
| 19 | 24369286 | 24630318 - | NM_008846    | Pip5k1b       | 42311  | 24587807 | 24588007 |
| 19 | 24369286 | 24630318 - | NM_008846    | Pip5k1b       | 106360 | 24523758 | 24523958 |
| 19 | 25074019 | 25276923 + | NM_028785    | Dock8         | 43480  | 25117499 | 25117699 |
| 19 | 25311692 | 25508987 + | NM_181404    | Kank1         | 30228  | 25341920 | 25342120 |
| 19 | 25311692 | 25508987 + | NM_181404    | Kank1         | 144833 | 25456525 | 25456725 |
| 19 | 25311692 | 25508987 + | NM_181404    | Kank1         | 63073  | 25374765 | 25374965 |
| 19 | 26679650 | 26852812 + | NM_011416    | Smarca2       | 8556   | 26688206 | 26688406 |
| 19 | 27397109 | 27411670 + | NM_183179    | Kcnv2         | -9341  | 27387568 | 27387768 |
| 19 | 27397109 | 27411670 + | NM_183179    | Kcnv2         | -5436  | 27391473 | 27391673 |
| 19 | 27836211 | 28057439 - | NM_001166414 | Rfx3          | 98171  | 27959068 | 27959268 |
| 19 | 27836211 | 28085657 - | NM_011265    | Rfx3          | 126389 | 27959068 | 27959268 |
| 19 | 28909656 | 28988451 + | NM_009199    | Slc1a1        | -3158  | 28906298 | 28906498 |
| 19 | 28909656 | 28988451 + | NM_009199    | Slc1a1        | -2588  | 28906868 | 28907068 |
| 19 | 28909656 | 28988451 + | NM_009199    | Slc1a1        | -3547  | 28905909 | 28906109 |
| 19 | 28997554 | 29038645 - | NM_198651    | 4430402118Rik | 34708  | 29003737 | 29003937 |
| 19 | 29095322 | 29122393 - | NM_021299    | Ak3           | -4954  | 29127347 | 29127547 |
| 19 | 29141791 | 29143994 + | NR_045687    | Gm9895        | -176   | 29141415 | 29141615 |
| 19 | 29326293 | 29387571 + | NM_001048177 | Jak2          | -9833  | 29316260 | 29316460 |
| 19 | 29326293 | 29387571 + | NM_001048177 | Jak2          | 11797  | 29338090 | 29338290 |

|    |          |            |              |               |       |          |          |
|----|----------|------------|--------------|---------------|-------|----------|----------|
| 19 | 29326293 | 29387571 + | NM_001048177 | Jak2          | 19497 | 29345790 | 29345990 |
| 19 | 29326293 | 29387571 + | NM_001048177 | Jak2          | -2879 | 29323214 | 29323414 |
| 19 | 29326293 | 29387571 + | NM_008413    | Jak2          | -9833 | 29316260 | 29316460 |
| 19 | 29326293 | 29387571 + | NM_008413    | Jak2          | 11797 | 29338090 | 29338290 |
| 19 | 29326293 | 29387571 + | NM_008413    | Jak2          | 19497 | 29345790 | 29345990 |
| 19 | 29326293 | 29387571 + | NM_008413    | Jak2          | -2879 | 29323214 | 29323414 |
| 19 | 29423167 | 29436362 - | NM_026362    | Plgrkt        | -5472 | 29441834 | 29442034 |
| 19 | 29441928 | 29462585 + | NM_021893    | Cd274         | 0     | 29441834 | 29442034 |
| 19 | 29485409 | 29547418 + | NM_021396    | Pdcd1lg2      | 61567 | 29546976 | 29547176 |
| 19 | 29772431 | 29782797 + | NM_029993    | Mlana         | 3030  | 29775461 | 29775661 |
| 19 | 29788892 | 29880500 - | NM_172836    | 9930021J03Rik | 89323 | 29790977 | 29791177 |
| 19 | 29999604 | 30035206 + | NM_133775    | Il33          | 16019 | 30015623 | 30015823 |
| 19 | 29999604 | 30035206 + | NM_133775    | Il33          | 22232 | 30021836 | 30022036 |
| 19 | 29999604 | 30035206 + | NM_133775    | Il33          | 20929 | 30020533 | 30020733 |
| 19 | 29999604 | 30035206 + | NM_133775    | Il33          | 19263 | 30018867 | 30019067 |
| 19 | 30020280 | 30035206 + | NM_001164724 | Il33          | -4457 | 30015623 | 30015823 |
| 19 | 30020280 | 30035206 + | NM_001164724 | Il33          | 1556  | 30021836 | 30022036 |
| 19 | 30020280 | 30035206 + | NM_001164724 | Il33          | 253   | 30020533 | 30020733 |
| 19 | 30020280 | 30035206 + | NM_001164724 | Il33          | -1213 | 30018867 | 30019067 |
| 19 | 30105003 | 30168215 + | NM_144873    | Uhrf2         | 1940  | 30106943 | 30107143 |
| 19 | 30172931 | 30249932 - | NM_138595    | Gldc          | 5015  | 30244717 | 30244917 |
| 19 | 31943251 | 32023897 + | NM_001081074 | A1cf          | 21733 | 31964984 | 31965184 |
| 19 | 31943251 | 32023897 + | NM_001081074 | A1cf          | 2768  | 31946019 | 31946219 |
| 19 | 31943251 | 32023897 + | NM_001081074 | A1cf          | 13393 | 31956644 | 31956844 |
| 19 | 32059141 | 32177631 - | NM_018830    | Asah2         | -4570 | 32182201 | 32182401 |
| 19 | 32059141 | 32177631 - | NM_018830    | Asah2         | 62498 | 32114933 | 32115133 |
| 19 | 32059141 | 32177631 - | NM_018830    | Asah2         | 36862 | 32140569 | 32140769 |
| 19 | 32059141 | 32177631 - | NM_018830    | Asah2         | 31904 | 32145527 | 32145727 |
| 19 | 32059141 | 32177631 - | NM_018830    | Asah2         | 45421 | 32132010 | 32132210 |
| 19 | 32059141 | 32177631 - | NM_018830    | Asah2         | 78578 | 32098853 | 32099053 |

|    |          |            |              |               |        |          |          |
|----|----------|------------|--------------|---------------|--------|----------|----------|
| 19 | 32059141 | 32177631 - | NM_018830    | Asah2         | 70015  | 32107416 | 32107616 |
| 19 | 32197217 | 32423807 - | NM_001168525 | Sgms1         | 85152  | 32338455 | 32338655 |
| 19 | 32197217 | 32423807 - | NM_001168525 | Sgms1         | 57044  | 32366563 | 32366763 |
| 19 | 32197217 | 32423807 - | NM_001168525 | Sgms1         | 191970 | 32231637 | 32231837 |
| 19 | 32197217 | 32423807 - | NM_001168525 | Sgms1         | 152700 | 32270907 | 32271107 |
| 19 | 32197217 | 32423807 - | NM_001168525 | Sgms1         | 219802 | 32203805 | 32204005 |
| 19 | 32197217 | 32285504 - | NM_001168526 | Sgms1         | 53667  | 32231637 | 32231837 |
| 19 | 32197217 | 32285504 - | NM_001168526 | Sgms1         | 14397  | 32270907 | 32271107 |
| 19 | 32197217 | 32285504 - | NM_001168526 | Sgms1         | 81499  | 32203805 | 32204005 |
| 19 | 32197217 | 32462945 - | NM_144792    | Sgms1         | -1656  | 32464601 | 32464801 |
| 19 | 32197217 | 32462945 - | NM_144792    | Sgms1         | 124290 | 32338455 | 32338655 |
| 19 | 32197217 | 32462945 - | NM_144792    | Sgms1         | 27633  | 32435112 | 32435312 |
| 19 | 32197217 | 32462945 - | NM_144792    | Sgms1         | 3166   | 32459579 | 32459779 |
| 19 | 32197217 | 32462945 - | NM_144792    | Sgms1         | 96182  | 32366563 | 32366763 |
| 19 | 32197217 | 32462945 - | NM_144792    | Sgms1         | 231108 | 32231637 | 32231837 |
| 19 | 32197217 | 32462945 - | NM_144792    | Sgms1         | 191838 | 32270907 | 32271107 |
| 19 | 32197217 | 32462945 - | NM_144792    | Sgms1         | 258940 | 32203805 | 32204005 |
| 19 | 32463706 | 32465675 + | NR_033198    | 2700046G09Rik | 895    | 32464601 | 32464801 |
| 19 | 32463706 | 32465675 + | NR_033198    | 2700046G09Rik | -3927  | 32459579 | 32459779 |
| 19 | 32560259 | 32589861 + | NM_010799    | Minpp1        | 19058  | 32579317 | 32579517 |
| 19 | 32560259 | 32589861 + | NM_010799    | Minpp1        | 25285  | 32585544 | 32585744 |
| 19 | 32560259 | 32589861 + | NM_010799    | Minpp1        | 24654  | 32584913 | 32585113 |
| 19 | 32560259 | 32589861 + | NM_010799    | Minpp1        | -4004  | 32556055 | 32556255 |
| 19 | 32560259 | 32589861 + | NM_010799    | Minpp1        | 11525  | 32571784 | 32571984 |
| 19 | 32670205 | 32741678 + | NM_001201470 | Papss2        | 42974  | 32713179 | 32713379 |
| 19 | 32670205 | 32741678 + | NM_001201470 | Papss2        | 54510  | 32724715 | 32724915 |
| 19 | 32670205 | 32741678 + | NM_001201470 | Papss2        | 52392  | 32722597 | 32722797 |
| 19 | 32670205 | 32741678 + | NM_001201470 | Papss2        | 27015  | 32697220 | 32697420 |
| 19 | 32670205 | 32741678 + | NM_001201470 | Papss2        | 42260  | 32712465 | 32712665 |
| 19 | 32670205 | 32741678 + | NM_001201470 | Papss2        | 18814  | 32689019 | 32689219 |

|    |          |            |              |          |        |          |          |
|----|----------|------------|--------------|----------|--------|----------|----------|
| 19 | 32670205 | 32741678 + | NM_001201470 | Papss2   | -173   | 32669832 | 32670032 |
| 19 | 32694495 | 32741678 + | NM_011864    | Papss2   | 18684  | 32713179 | 32713379 |
| 19 | 32694495 | 32741678 + | NM_011864    | Papss2   | 30220  | 32724715 | 32724915 |
| 19 | 32694495 | 32741678 + | NM_011864    | Papss2   | 28102  | 32722597 | 32722797 |
| 19 | 32694495 | 32741678 + | NM_011864    | Papss2   | 2725   | 32697220 | 32697420 |
| 19 | 32694495 | 32741678 + | NM_011864    | Papss2   | 17970  | 32712465 | 32712665 |
| 19 | 32694495 | 32741678 + | NM_011864    | Papss2   | -5276  | 32689019 | 32689219 |
| 19 | 32832067 | 32900651 + | NM_008960    | Pten     | -2466  | 32829401 | 32829601 |
| 19 | 32832067 | 32900651 + | NM_008960    | Pten     | -1632  | 32830235 | 32830435 |
| 19 | 33212235 | 33466786 - | NM_001146342 | Rnls     | 25285  | 33441301 | 33441501 |
| 19 | 33212235 | 33466786 - | NM_001167818 | Rnls     | 25285  | 33441301 | 33441501 |
| 19 | 34141848 | 34159409 + | NM_027340    | Lipn     | 7030   | 34148878 | 34149078 |
| 19 | 34266760 | 34314819 + | NM_029682    | Stambpl1 | 18603  | 34285363 | 34285563 |
| 19 | 34566806 | 34601965 - | NM_001111100 | Lipa     | 8314   | 34593451 | 34593651 |
| 19 | 34566806 | 34601965 - | NM_001111100 | Lipa     | 30743  | 34571022 | 34571222 |
| 19 | 34566806 | 34601965 - | NM_001111100 | Lipa     | 9323   | 34592442 | 34592642 |
| 19 | 34566806 | 34601965 - | NM_021460    | Lipa     | 8314   | 34593451 | 34593651 |
| 19 | 34566806 | 34601965 - | NM_021460    | Lipa     | 30743  | 34571022 | 34571222 |
| 19 | 34566806 | 34601965 - | NM_021460    | Lipa     | 9323   | 34592442 | 34592642 |
| 19 | 34625184 | 34651025 + | NM_008332    | lfit2    | -9567  | 34615417 | 34615617 |
| 19 | 34881426 | 34953946 - | NM_001114339 | Pank1    | 30705  | 34923041 | 34923241 |
| 19 | 34881426 | 34953946 - | NM_001114339 | Pank1    | 33055  | 34920691 | 34920891 |
| 19 | 34881426 | 34952408 - | NM_023792    | Pank1    | 29167  | 34923041 | 34923241 |
| 19 | 34881426 | 34952408 - | NM_023792    | Pank1    | 31517  | 34920691 | 34920891 |
| 19 | 34996848 | 35050222 + | NM_183046    | Kif20b   | -1328  | 34995320 | 34995520 |
| 19 | 36453557 | 36530695 + | NM_029508    | Pcgf5    | -7335  | 36446022 | 36446222 |
| 19 | 37095781 | 37250554 - | NM_001290826 | Cpeb3    | 82569  | 37167785 | 37167985 |
| 19 | 37095781 | 37250554 - | NM_001290826 | Cpeb3    | 2319   | 37248035 | 37248235 |
| 19 | 37095781 | 37281962 - | NM_001290827 | Cpeb3    | 113977 | 37167785 | 37167985 |
| 19 | 37095781 | 37281962 - | NM_001290827 | Cpeb3    | -2165  | 37284127 | 37284327 |

|    |          |            |              |               |        |          |          |
|----|----------|------------|--------------|---------------|--------|----------|----------|
| 19 | 37095781 | 37281962 - | NM_001290827 | Cpeb3         | 33727  | 37248035 | 37248235 |
| 19 | 37095781 | 37281962 - | NM_001290828 | Cpeb3         | 113977 | 37167785 | 37167985 |
| 19 | 37095781 | 37281962 - | NM_001290828 | Cpeb3         | -2165  | 37284127 | 37284327 |
| 19 | 37095781 | 37281962 - | NM_001290828 | Cpeb3         | 33727  | 37248035 | 37248235 |
| 19 | 37095781 | 37272599 - | NM_001290829 | Cpeb3         | 104614 | 37167785 | 37167985 |
| 19 | 37095781 | 37272599 - | NM_001290829 | Cpeb3         | 24364  | 37248035 | 37248235 |
| 19 | 37095781 | 37281962 - | NM_198300    | Cpeb3         | 113977 | 37167785 | 37167985 |
| 19 | 37095781 | 37281962 - | NM_198300    | Cpeb3         | -2165  | 37284127 | 37284327 |
| 19 | 37095781 | 37281962 - | NM_198300    | Cpeb3         | 33727  | 37248035 | 37248235 |
| 19 | 37248333 | 37271032 + | NR_045329    | A330032B11Rik | -98    | 37248035 | 37248235 |
| 19 | 37282035 | 37295567 + | NM_001164336 | March5        | 2092   | 37284127 | 37284327 |
| 19 | 37282035 | 37292706 + | NM_001164337 | March5        | 2092   | 37284127 | 37284327 |
| 19 | 37282035 | 37298948 + | NM_027314    | March5        | 2092   | 37284127 | 37284327 |
| 19 | 38129515 | 38148916 + | NM_028293    | Cep55         | -1005  | 38128310 | 38128510 |
| 19 | 38129532 | 38148916 + | NM_001164362 | Cep55         | -1022  | 38128310 | 38128510 |
| 19 | 38129532 | 38148916 + | NM_028760    | Cep55         | -1022  | 38128310 | 38128510 |
| 19 | 38171569 | 38188754 + | NM_181748    | Ffar4         | 10797  | 38182366 | 38182566 |
| 19 | 38470470 | 38480098 + | NM_175507    | Slc35g1       | 4712   | 38475182 | 38475382 |
| 19 | 38598687 | 38859591 + | NM_019588    | Plce1         | 79537  | 38678224 | 38678424 |
| 19 | 38598687 | 38859591 + | NM_019588    | Plce1         | 195086 | 38793773 | 38793973 |
| 19 | 38598687 | 38859591 + | NM_019588    | Plce1         | 193797 | 38792484 | 38792684 |
| 19 | 38598687 | 38859591 + | NM_019588    | Plce1         | 31812  | 38630499 | 38630699 |
| 19 | 38598687 | 38859591 + | NM_019588    | Plce1         | 33998  | 38632685 | 38632885 |
| 19 | 39135496 | 39168439 + | NM_028191    | Cyp2c65       | 0      | 39135315 | 39135515 |
| 19 | 39188388 | 39261247 + | NM_001011707 | Cyp2c66       | 2373   | 39190761 | 39190961 |
| 19 | 40296729 | 40346107 - | NM_016861    | Pdlim1        | 30869  | 40315038 | 40315238 |
| 19 | 40296729 | 40346107 - | NM_016861    | Pdlim1        | 7304   | 40338603 | 40338803 |
| 19 | 40296729 | 40346107 - | NM_016861    | Pdlim1        | 5326   | 40340581 | 40340781 |
| 19 | 40296729 | 40346107 - | NM_016861    | Pdlim1        | 24012  | 40321895 | 40322095 |
| 19 | 40366530 | 40525889 - | NM_001034962 | Sorbs1        | 153601 | 40372088 | 40372288 |

|    |          |            |              |          |        |          |          |
|----|----------|------------|--------------|----------|--------|----------|----------|
| 19 | 40366530 | 40525889 - | NM_001034962 | Sorbs1   | 80826  | 40444863 | 40445063 |
| 19 | 40366530 | 40525889 - | NM_001034962 | Sorbs1   | 102721 | 40422968 | 40423168 |
| 19 | 40366530 | 40525889 - | NM_001034963 | Sorbs1   | 153601 | 40372088 | 40372288 |
| 19 | 40366530 | 40525889 - | NM_001034963 | Sorbs1   | 80826  | 40444863 | 40445063 |
| 19 | 40366530 | 40525889 - | NM_001034963 | Sorbs1   | 102721 | 40422968 | 40423168 |
| 19 | 40366530 | 40476801 - | NM_001034964 | Sorbs1   | 104513 | 40372088 | 40372288 |
| 19 | 40366530 | 40476801 - | NM_001034964 | Sorbs1   | 31738  | 40444863 | 40445063 |
| 19 | 40366530 | 40476801 - | NM_001034964 | Sorbs1   | 53633  | 40422968 | 40423168 |
| 19 | 40366530 | 40588303 - | NM_009166    | Sorbs1   | 216015 | 40372088 | 40372288 |
| 19 | 40366530 | 40588303 - | NM_009166    | Sorbs1   | 22247  | 40565856 | 40566056 |
| 19 | 40366530 | 40588303 - | NM_009166    | Sorbs1   | 14408  | 40573695 | 40573895 |
| 19 | 40366530 | 40588303 - | NM_009166    | Sorbs1   | 19397  | 40568706 | 40568906 |
| 19 | 40366530 | 40588303 - | NM_009166    | Sorbs1   | 143240 | 40444863 | 40445063 |
| 19 | 40366530 | 40588303 - | NM_009166    | Sorbs1   | 22768  | 40565335 | 40565535 |
| 19 | 40366530 | 40588303 - | NM_009166    | Sorbs1   | 165135 | 40422968 | 40423168 |
| 19 | 40366530 | 40588227 - | NM_178362    | Sorbs1   | 215939 | 40372088 | 40372288 |
| 19 | 40366530 | 40588227 - | NM_178362    | Sorbs1   | 22171  | 40565856 | 40566056 |
| 19 | 40366530 | 40588227 - | NM_178362    | Sorbs1   | 14332  | 40573695 | 40573895 |
| 19 | 40366530 | 40588227 - | NM_178362    | Sorbs1   | 19321  | 40568706 | 40568906 |
| 19 | 40366530 | 40588227 - | NM_178362    | Sorbs1   | 143164 | 40444863 | 40445063 |
| 19 | 40366530 | 40588227 - | NM_178362    | Sorbs1   | 22692  | 40565335 | 40565535 |
| 19 | 40366530 | 40588227 - | NM_178362    | Sorbs1   | 165059 | 40422968 | 40423168 |
| 19 | 40624747 | 40662954 - | NM_019698    | Aldh18a1 | 12463  | 40650291 | 40650491 |
| 19 | 40624747 | 40662954 - | NM_019698    | Aldh18a1 | 1336   | 40661418 | 40661618 |
| 19 | 40624747 | 40662954 - | NM_019698    | Aldh18a1 | 3283   | 40659471 | 40659671 |
| 19 | 40624747 | 40662954 - | NM_019698    | Aldh18a1 | 7185   | 40655569 | 40655769 |
| 19 | 40624747 | 40662954 - | NM_019698    | Aldh18a1 | 17450  | 40645304 | 40645504 |
| 19 | 40624747 | 40662954 - | NM_153554    | Aldh18a1 | 12463  | 40650291 | 40650491 |
| 19 | 40624747 | 40662954 - | NM_153554    | Aldh18a1 | 1336   | 40661418 | 40661618 |
| 19 | 40624747 | 40662954 - | NM_153554    | Aldh18a1 | 3283   | 40659471 | 40659671 |

|    |          |            |              |          |       |          |          |
|----|----------|------------|--------------|----------|-------|----------|----------|
| 19 | 40624747 | 40662954 - | NM_153554    | Aldh18a1 | 7185  | 40655569 | 40655769 |
| 19 | 40624747 | 40662954 - | NM_153554    | Aldh18a1 | 17450 | 40645304 | 40645504 |
| 19 | 41003417 | 41069026 - | NM_008528    | Blnc     | -5114 | 41074140 | 41074340 |
| 19 | 41103765 | 41134016 + | NM_001043228 | Dntt     | -7818 | 41095747 | 41095947 |
| 19 | 41103765 | 41134016 + | NM_009345    | Dntt     | -7818 | 41095747 | 41095947 |
| 19 | 41158471 | 41281265 - | NM_011904    | Tll2     | 26503 | 41254562 | 41254762 |
| 19 | 41285332 | 41338495 - | NM_133352    | Tm9sf3   | -371  | 41338866 | 41339066 |
| 19 | 41348708 | 41459561 - | NM_031376    | Pik3ap1  | 64664 | 41394697 | 41394897 |
| 19 | 41674747 | 41818347 - | NM_015748    | Slit1    | 21936 | 41796211 | 41796411 |
| 19 | 41841078 | 41876575 - | NM_001163495 | Arhgap19 | 5712  | 41870663 | 41870863 |
| 19 | 41841078 | 41876575 - | NM_001163495 | Arhgap19 | 8767  | 41867608 | 41867808 |
| 19 | 41841078 | 41876575 - | NM_027667    | Arhgap19 | 5712  | 41870663 | 41870863 |
| 19 | 41841078 | 41876575 - | NM_027667    | Arhgap19 | 8767  | 41867608 | 41867808 |
| 19 | 41920465 | 41922623 - | NM_177603    | Frat2    | -9400 | 41932023 | 41932223 |
| 19 | 41986361 | 41993156 + | NM_023418    | Pgam1    | 977   | 41987338 | 41987538 |
| 19 | 42018197 | 42055627 - | NM_028152    | Mms19    | 19479 | 42035948 | 42036148 |
| 19 | 42018197 | 42055627 - | NM_028152    | Mms19    | 12984 | 42042443 | 42042643 |
| 19 | 42018197 | 42055627 - | NM_028152    | Mms19    | 20080 | 42035347 | 42035547 |
| 19 | 42245057 | 42269083 + | NM_001164531 | Zfyve27  | -705  | 42244152 | 42244352 |
| 19 | 42245057 | 42269083 + | NM_177319    | Zfyve27  | -705  | 42244152 | 42244352 |
| 19 | 42272461 | 42276743 - | NM_018780    | Sfrp5    | -2629 | 42279372 | 42279572 |
| 19 | 42593295 | 42666747 + | NM_177464    | R3hcc1l  | 28576 | 42621871 | 42622071 |
| 19 | 42593295 | 42666747 + | NM_177464    | R3hcc1l  | -7893 | 42585202 | 42585402 |
| 19 | 42593295 | 42666747 + | NM_177464    | R3hcc1l  | 5681  | 42598976 | 42599176 |
| 19 | 43574243 | 43599096 - | NM_010324    | Got1     | 0     | 43599084 | 43599284 |
| 19 | 43686815 | 43690383 + | NM_008699    | Nkx2-3   | -2737 | 43683878 | 43684078 |
| 19 | 43764179 | 43808344 + | NM_053103    | Entpd7   | 19960 | 43784139 | 43784339 |
| 19 | 43764179 | 43808344 + | NM_053103    | Entpd7   | 6138  | 43770317 | 43770517 |
| 19 | 43807744 | 43827491 - | NM_144874    | Cox15    | -377  | 43827868 | 43828068 |
| 19 | 43827513 | 43843129 + | NM_001113562 | Cutc     | 355   | 43827868 | 43828068 |



|    |          |            |              |               |       |          |          |
|----|----------|------------|--------------|---------------|-------|----------|----------|
| 19 | 43827513 | 43843129 + | NM_025530    | Cutc          | 355   | 43827868 | 43828068 |
| 19 | 43856798 | 43912709 + | NM_013806    | Abcc2         | -22   | 43856576 | 43856776 |
| 19 | 43856798 | 43912709 + | NM_013806    | Abcc2         | -6636 | 43849962 | 43850162 |
| 19 | 43921305 | 43954259 - | NM_001306088 | Dnmbp         | -4956 | 43959215 | 43959415 |
| 19 | 43921305 | 43954259 - | NM_001306088 | Dnmbp         | 2649  | 43951410 | 43951610 |
| 19 | 43921305 | 44014689 - | NM_028029    | Dnmbp         | 23019 | 43991470 | 43991670 |
| 19 | 43921305 | 44014689 - | NM_028029    | Dnmbp         | 18477 | 43996012 | 43996212 |
| 19 | 43921305 | 44014689 - | NM_028029    | Dnmbp         | 21233 | 43993256 | 43993456 |
| 19 | 43921305 | 44014689 - | NM_028029    | Dnmbp         | 55274 | 43959215 | 43959415 |
| 19 | 43921305 | 44014689 - | NM_028029    | Dnmbp         | 35561 | 43978928 | 43979128 |
| 19 | 43921305 | 44014689 - | NM_028029    | Dnmbp         | 63079 | 43951410 | 43951610 |
| 19 | 44079512 | 44103738 - | NM_001001446 | Cyp2c44       | 4017  | 44099521 | 44099721 |
| 19 | 44081281 | 44103738 - | NM_001167905 | Cyp2c44       | 4017  | 44099521 | 44099721 |
| 19 | 44109433 | 44144266 - | NM_001164359 | Erlin1        | 14355 | 44129711 | 44129911 |
| 19 | 44109433 | 44144276 - | NM_001164360 | Erlin1        | 14365 | 44129711 | 44129911 |
| 19 | 44109433 | 44144177 - | NM_145502    | Erlin1        | 14266 | 44129711 | 44129911 |
| 19 | 44147824 | 44181968 - | NM_001162410 | Chuk          | -4100 | 44186068 | 44186268 |
| 19 | 44147824 | 44181968 - | NM_007700    | Chuk          | -4100 | 44186068 | 44186268 |
| 19 | 44183127 | 44210367 - | NM_001081077 | Cwf19l1       | 24099 | 44186068 | 44186268 |
| 19 | 44368166 | 44381353 + | NM_009128    | Scd2          | -8671 | 44359295 | 44359495 |
| 19 | 44368166 | 44381353 + | NM_009128    | Scd2          | 435   | 44368601 | 44368801 |
| 19 | 44377661 | 44377722 + | NR_039574    | Mir5114       | -8860 | 44368601 | 44368801 |
| 19 | 44831884 | 44912360 + | NM_011037    | Pax2          | 14290 | 44846174 | 44846374 |
| 19 | 45046607 | 45059041 - | NR_040294    | 4930414N06Rik | -367  | 45059408 | 45059608 |
| 19 | 45046607 | 45059041 - | NR_040294    | 4930414N06Rik | -5086 | 45064127 | 45064327 |
| 19 | 45063834 | 45077886 + | NM_011976    | Sema4g        | -4226 | 45059408 | 45059608 |
| 19 | 45063834 | 45077886 + | NM_011976    | Sema4g        | 293   | 45064127 | 45064327 |
| 19 | 45635105 | 45652778 + | NM_172639    | Dpcd          | 15080 | 45650185 | 45650385 |
| 19 | 45652747 | 45734684 - | NM_013907    | Fbxw4         | 10075 | 45724409 | 45724609 |
| 19 | 45811288 | 45817375 - | NM_001166361 | Fgf8          | -2570 | 45819945 | 45820145 |

|    |          |            |              |               |       |          |          |
|----|----------|------------|--------------|---------------|-------|----------|----------|
| 19 | 45811288 | 45817375 - | NM_001166362 | Fgf8          | -2570 | 45819945 | 45820145 |
| 19 | 45811288 | 45817375 - | NM_001166363 | Fgf8          | -2570 | 45819945 | 45820145 |
| 19 | 45811288 | 45817375 - | NM_010205    | Fgf8          | -2570 | 45819945 | 45820145 |
| 19 | 46210176 | 46222816 - | NM_008852    | Pitx3         | 10746 | 46211870 | 46212070 |
| 19 | 46451304 | 46470226 - | NM_016860    | Actr1a        | 920   | 46469106 | 46469306 |
| 19 | 46471386 | 46563295 + | NM_001025391 | Sufu          | -2080 | 46469106 | 46469306 |
| 19 | 46471386 | 46563295 + | NM_001025391 | Sufu          | 72805 | 46544191 | 46544391 |
| 19 | 46471386 | 46563295 + | NM_001025391 | Sufu          | 62405 | 46533791 | 46533991 |
| 19 | 46471386 | 46563295 + | NM_015752    | Sufu          | -2080 | 46469106 | 46469306 |
| 19 | 46471386 | 46563295 + | NM_015752    | Sufu          | 72805 | 46544191 | 46544391 |
| 19 | 46471386 | 46563295 + | NM_015752    | Sufu          | 62405 | 46533791 | 46533991 |
| 19 | 46576138 | 46590946 + | NM_053100    | Trim8         | 1298  | 46577436 | 46577636 |
| 19 | 46741655 | 46747491 - | NM_007809    | Cyp17a1       | -20   | 46747511 | 46747711 |
| 19 | 46741655 | 46747491 - | NM_007809    | Cyp17a1       | -6789 | 46754280 | 46754480 |
| 19 | 46764396 | 46777873 + | NM_025563    | 2010012O05Rik | -9916 | 46754280 | 46754480 |
| 19 | 46781933 | 46815586 + | NM_020577    | As3mt         | 27877 | 46809810 | 46810010 |
| 19 | 46781933 | 46815586 + | NM_020577    | As3mt         | 20715 | 46802648 | 46802848 |
| 19 | 46836099 | 46953071 + | NM_001102471 | Cnm2          | -6147 | 46829752 | 46829952 |
| 19 | 46836099 | 46953071 + | NM_001102471 | Cnm2          | 56995 | 46893094 | 46893294 |
| 19 | 46836099 | 46953071 + | NM_033569    | Cnm2          | -6147 | 46829752 | 46829952 |
| 19 | 46836099 | 46953071 + | NM_033569    | Cnm2          | 56995 | 46893094 | 46893294 |
| 19 | 46961321 | 47089680 - | NM_001164363 | Nt5c2         | 1814  | 47087666 | 47087866 |
| 19 | 46961321 | 47089680 - | NM_001164363 | Nt5c2         | 36021 | 47053459 | 47053659 |
| 19 | 46961321 | 47089680 - | NM_001164363 | Nt5c2         | 26389 | 47063091 | 47063291 |
| 19 | 46961321 | 47044058 - | NM_001164365 | Nt5c2         | -9401 | 47053459 | 47053659 |
| 19 | 47089188 | 47098837 + | NM_146100    | Ina           | -1322 | 47087666 | 47087866 |
| 19 | 47165256 | 47205636 + | NM_011053    | Pdcd11        | 15160 | 47180416 | 47180616 |
| 19 | 47206722 | 47212785 - | NM_133746    | Calhm2        | 1453  | 47211132 | 47211332 |
| 19 | 47334664 | 47538902 - | NM_001164717 | Sh3pxd2a      | 51091 | 47487611 | 47487811 |
| 19 | 47334664 | 47538902 - | NM_008018    | Sh3pxd2a      | 51091 | 47487611 | 47487811 |

|    |          |            |              |               |        |          |          |
|----|----------|------------|--------------|---------------|--------|----------|----------|
| 19 | 47654509 | 47719737 + | NM_001164639 | Slk           | 10078  | 47664587 | 47664787 |
| 19 | 47654509 | 47719737 + | NM_009289    | Slk           | 10078  | 47664587 | 47664787 |
| 19 | 47929479 | 47939279 + | NM_010362    | Gsto1         | 719    | 47930198 | 47930398 |
| 19 | 47940035 | 47960796 + | NM_030051    | Gsto2         | -9637  | 47930198 | 47930398 |
| 19 | 47940284 | 47960796 + | NM_026619    | Gsto2         | -9886  | 47930198 | 47930398 |
| 19 | 53065670 | 53113145 - | NM_133216    | Xpnpep1       | 6204   | 53106741 | 53106941 |
| 19 | 53065670 | 53113145 - | NM_133216    | Xpnpep1       | 4991   | 53107954 | 53108154 |
| 19 | 53065670 | 53113145 - | NM_133216    | Xpnpep1       | 16271  | 53096674 | 53096874 |
| 19 | 53065670 | 53113145 - | NM_133216    | Xpnpep1       | 15393  | 53097552 | 53097752 |
| 19 | 53150742 | 53158883 + | NR_045320    | 1700054A03Rik | -1100  | 53149442 | 53149642 |
| 19 | 53214933 | 53321817 + | NM_001164099 | Add3          | 45149  | 53260082 | 53260282 |
| 19 | 53214933 | 53321817 + | NM_001164101 | Add3          | 45149  | 53260082 | 53260282 |
| 19 | 53217246 | 53321817 + | NM_001164100 | Add3          | 42836  | 53260082 | 53260282 |
| 19 | 53217246 | 53321817 + | NM_001277100 | Add3          | 42836  | 53260082 | 53260282 |
| 19 | 53218487 | 53321817 + | NM_013758    | Add3          | 41595  | 53260082 | 53260282 |
| 19 | 53323226 | 53329696 - | NR_036590    | 1700001K23Rik | -1871  | 53331567 | 53331767 |
| 19 | 53384996 | 53450301 + | NM_001008542 | Mxi1          | -6766  | 53378030 | 53378230 |
| 19 | 53384996 | 53450301 + | NM_001008542 | Mxi1          | 12316  | 53397312 | 53397512 |
| 19 | 53384996 | 53450301 + | NM_001008542 | Mxi1          | 3596   | 53388592 | 53388792 |
| 19 | 53403903 | 53450301 + | NM_010847    | Mxi1          | -6391  | 53397312 | 53397512 |
| 19 | 53404936 | 53450301 + | NM_001008543 | Mxi1          | -7424  | 53397312 | 53397512 |
| 19 | 53515702 | 53539287 - | NR_028427    | 5830416P10Rik | 15029  | 53524058 | 53524258 |
| 19 | 53751796 | 53941571 + | NM_001170847 | Rbm20         | 111860 | 53863656 | 53863856 |
| 19 | 53751796 | 53941571 + | NM_001170847 | Rbm20         | 153234 | 53905030 | 53905230 |
| 19 | 53751796 | 53941571 + | NM_001170847 | Rbm20         | 171380 | 53923176 | 53923376 |
| 19 | 53751796 | 53941571 + | NM_001170847 | Rbm20         | 169099 | 53920895 | 53921095 |
| 19 | 53751796 | 53941571 + | NM_001170847 | Rbm20         | 123278 | 53875074 | 53875274 |
| 19 | 53751796 | 53941571 + | NM_001170847 | Rbm20         | 124692 | 53876488 | 53876688 |
| 19 | 53751796 | 53941571 + | NM_001170847 | Rbm20         | 122697 | 53874493 | 53874693 |
| 19 | 53751796 | 53941571 + | NM_001170847 | Rbm20         | 23969  | 53775765 | 53775965 |

|    |          |            |              |        |        |          |          |
|----|----------|------------|--------------|--------|--------|----------|----------|
| 19 | 53751796 | 53941571 + | NM_001170847 | Rbm20  | 109579 | 53861375 | 53861575 |
| 19 | 53966721 | 54004352 + | NM_011050    | Pdcd4  | 10333  | 53977054 | 53977254 |
| 19 | 53966721 | 54004352 + | NM_011050    | Pdcd4  | 33037  | 53999758 | 53999958 |
| 19 | 53966721 | 54004352 + | NM_011050    | Pdcd4  | -1251  | 53965270 | 53965470 |
| 19 | 53977841 | 54004352 + | NM_001168491 | Pdcd4  | -587   | 53977054 | 53977254 |
| 19 | 53977841 | 54004352 + | NM_001168491 | Pdcd4  | 21917  | 53999758 | 53999958 |
| 19 | 53977841 | 54004352 + | NM_001168492 | Pdcd4  | -587   | 53977054 | 53977254 |
| 19 | 53977841 | 54004352 + | NM_001168492 | Pdcd4  | 21917  | 53999758 | 53999958 |
| 19 | 54119672 | 54123473 + | NM_007417    | Adra2a | 2278   | 54121950 | 54122150 |
| 19 | 55144224 | 55173938 - | NM_008149    | Gpam   | -1067  | 55175005 | 55175205 |
| 19 | 55272588 | 55315727 - | NM_001081076 | Gucy2g | -6655  | 55322382 | 55322582 |
| 19 | 55272588 | 55315727 - | NM_001081076 | Gucy2g | -4164  | 55319891 | 55320091 |
| 19 | 55327859 | 55371119 + | NM_027976    | Acsl5  | 5903   | 55333762 | 55333962 |
| 19 | 55327859 | 55371119 + | NM_027976    | Acsl5  | 21227  | 55349086 | 55349286 |
| 19 | 55327859 | 55371119 + | NM_027976    | Acsl5  | 10350  | 55338209 | 55338409 |
| 19 | 55327859 | 55371119 + | NM_027976    | Acsl5  | 8849   | 55336708 | 55336908 |
| 19 | 55327859 | 55371119 + | NM_027976    | Acsl5  | -5277  | 55322382 | 55322582 |
| 19 | 55327859 | 55371119 + | NM_027976    | Acsl5  | 4448   | 55332307 | 55332507 |
| 19 | 55327859 | 55371119 + | NM_027976    | Acsl5  | 5173   | 55333032 | 55333232 |
| 19 | 55327859 | 55371119 + | NM_027976    | Acsl5  | 3727   | 55331586 | 55331786 |
| 19 | 55327859 | 55371119 + | NM_027976    | Acsl5  | -7768  | 55319891 | 55320091 |
| 19 | 55372789 | 55390523 - | NM_001033573 | Zdhhc6 | 5804   | 55384519 | 55384719 |
| 19 | 55372789 | 55390523 - | NM_025883    | Zdhhc6 | 5804   | 55384519 | 55384719 |
| 19 | 55390547 | 55701952 + | NM_001293685 | Vti1a  | 266913 | 55657460 | 55657660 |
| 19 | 55390547 | 55701952 + | NM_001293685 | Vti1a  | 280021 | 55670568 | 55670768 |
| 19 | 55390547 | 55701952 + | NM_001293685 | Vti1a  | 91696  | 55482243 | 55482443 |
| 19 | 55390547 | 55701952 + | NM_001293685 | Vti1a  | 234173 | 55624720 | 55624920 |
| 19 | 55390547 | 55701952 + | NM_001293685 | Vti1a  | 262516 | 55653063 | 55653263 |
| 19 | 55390547 | 55701952 + | NM_001293685 | Vti1a  | 191952 | 55582499 | 55582699 |
| 19 | 55390547 | 55701952 + | NM_001293685 | Vti1a  | -5828  | 55384519 | 55384719 |

|    |          |            |              |               |        |          |          |
|----|----------|------------|--------------|---------------|--------|----------|----------|
| 19 | 55390547 | 55701952 + | NM_001293686 | Vti1a         | 266913 | 55657460 | 55657660 |
| 19 | 55390547 | 55701952 + | NM_001293686 | Vti1a         | 280021 | 55670568 | 55670768 |
| 19 | 55390547 | 55701952 + | NM_001293686 | Vti1a         | 91696  | 55482243 | 55482443 |
| 19 | 55390547 | 55701952 + | NM_001293686 | Vti1a         | 234173 | 55624720 | 55624920 |
| 19 | 55390547 | 55701952 + | NM_001293686 | Vti1a         | 262516 | 55653063 | 55653263 |
| 19 | 55390547 | 55701952 + | NM_001293686 | Vti1a         | 191952 | 55582499 | 55582699 |
| 19 | 55390547 | 55701952 + | NM_001293686 | Vti1a         | -5828  | 55384519 | 55384719 |
| 19 | 55390547 | 55701952 + | NM_016862    | Vti1a         | 266913 | 55657460 | 55657660 |
| 19 | 55390547 | 55701952 + | NM_016862    | Vti1a         | 280021 | 55670568 | 55670768 |
| 19 | 55390547 | 55701952 + | NM_016862    | Vti1a         | 91696  | 55482243 | 55482443 |
| 19 | 55390547 | 55701952 + | NM_016862    | Vti1a         | 234173 | 55624720 | 55624920 |
| 19 | 55390547 | 55701952 + | NM_016862    | Vti1a         | 262516 | 55653063 | 55653263 |
| 19 | 55390547 | 55701952 + | NM_016862    | Vti1a         | 191952 | 55582499 | 55582699 |
| 19 | 55390547 | 55701952 + | NM_016862    | Vti1a         | -5828  | 55384519 | 55384719 |
| 19 | 55715079 | 55776695 - | NR_045318    | 4930552P12Rik | 1333   | 55775162 | 55775362 |
| 19 | 55715079 | 55776695 - | NR_045318    | 4930552P12Rik | 12274  | 55764221 | 55764421 |
| 19 | 55715079 | 55776695 - | NR_045318    | 4930552P12Rik | 3110   | 55773385 | 55773585 |
| 19 | 55816300 | 56008146 + | NM_001142918 | Tcf7l2        | 83621  | 55899921 | 55900121 |
| 19 | 55816300 | 56008146 + | NM_001142918 | Tcf7l2        | 123115 | 55939415 | 55939615 |
| 19 | 55816300 | 56008146 + | NM_001142918 | Tcf7l2        | 125653 | 55941953 | 55942153 |
| 19 | 55816300 | 56008146 + | NM_001142918 | Tcf7l2        | 141021 | 55957321 | 55957521 |
| 19 | 55816300 | 56008146 + | NM_001142918 | Tcf7l2        | 124080 | 55940380 | 55940580 |
| 19 | 55816300 | 56008146 + | NM_001142918 | Tcf7l2        | 112740 | 55929040 | 55929240 |
| 19 | 55816300 | 56008146 + | NM_001142918 | Tcf7l2        | 118242 | 55934542 | 55934742 |
| 19 | 55816300 | 56008146 + | NM_001142918 | Tcf7l2        | 108662 | 55924962 | 55925162 |
| 19 | 55816300 | 56008146 + | NM_001142918 | Tcf7l2        | 86060  | 55902360 | 55902560 |
| 19 | 55816300 | 56008146 + | NM_001142918 | Tcf7l2        | 51609  | 55867909 | 55868109 |
| 19 | 55816300 | 56008146 + | NM_001142918 | Tcf7l2        | 64868  | 55881168 | 55881368 |
| 19 | 55816300 | 56008146 + | NM_001142918 | Tcf7l2        | 14939  | 55831239 | 55831439 |
| 19 | 55816300 | 56008146 + | NM_001142919 | Tcf7l2        | 83621  | 55899921 | 55900121 |

|    |          |            |              |        |        |          |          |
|----|----------|------------|--------------|--------|--------|----------|----------|
| 19 | 55816300 | 56008146 + | NM_001142919 | Tcf7l2 | 123115 | 55939415 | 55939615 |
| 19 | 55816300 | 56008146 + | NM_001142919 | Tcf7l2 | 125653 | 55941953 | 55942153 |
| 19 | 55816300 | 56008146 + | NM_001142919 | Tcf7l2 | 141021 | 55957321 | 55957521 |
| 19 | 55816300 | 56008146 + | NM_001142919 | Tcf7l2 | 124080 | 55940380 | 55940580 |
| 19 | 55816300 | 56008146 + | NM_001142919 | Tcf7l2 | 112740 | 55929040 | 55929240 |
| 19 | 55816300 | 56008146 + | NM_001142919 | Tcf7l2 | 118242 | 55934542 | 55934742 |
| 19 | 55816300 | 56008146 + | NM_001142919 | Tcf7l2 | 108662 | 55924962 | 55925162 |
| 19 | 55816300 | 56008146 + | NM_001142919 | Tcf7l2 | 86060  | 55902360 | 55902560 |
| 19 | 55816300 | 56008146 + | NM_001142919 | Tcf7l2 | 51609  | 55867909 | 55868109 |
| 19 | 55816300 | 56008146 + | NM_001142919 | Tcf7l2 | 64868  | 55881168 | 55881368 |
| 19 | 55816300 | 56008146 + | NM_001142919 | Tcf7l2 | 14939  | 55831239 | 55831439 |
| 19 | 55816300 | 56008146 + | NM_001142920 | Tcf7l2 | 83621  | 55899921 | 55900121 |
| 19 | 55816300 | 56008146 + | NM_001142920 | Tcf7l2 | 123115 | 55939415 | 55939615 |
| 19 | 55816300 | 56008146 + | NM_001142920 | Tcf7l2 | 125653 | 55941953 | 55942153 |
| 19 | 55816300 | 56008146 + | NM_001142920 | Tcf7l2 | 141021 | 55957321 | 55957521 |
| 19 | 55816300 | 56008146 + | NM_001142920 | Tcf7l2 | 124080 | 55940380 | 55940580 |
| 19 | 55816300 | 56008146 + | NM_001142920 | Tcf7l2 | 112740 | 55929040 | 55929240 |
| 19 | 55816300 | 56008146 + | NM_001142920 | Tcf7l2 | 118242 | 55934542 | 55934742 |
| 19 | 55816300 | 56008146 + | NM_001142920 | Tcf7l2 | 108662 | 55924962 | 55925162 |
| 19 | 55816300 | 56008146 + | NM_001142920 | Tcf7l2 | 86060  | 55902360 | 55902560 |
| 19 | 55816300 | 56008146 + | NM_001142920 | Tcf7l2 | 51609  | 55867909 | 55868109 |
| 19 | 55816300 | 56008146 + | NM_001142920 | Tcf7l2 | 64868  | 55881168 | 55881368 |
| 19 | 55816300 | 56008146 + | NM_001142920 | Tcf7l2 | 14939  | 55831239 | 55831439 |
| 19 | 55816300 | 56008146 + | NM_001142921 | Tcf7l2 | 83621  | 55899921 | 55900121 |
| 19 | 55816300 | 56008146 + | NM_001142921 | Tcf7l2 | 123115 | 55939415 | 55939615 |
| 19 | 55816300 | 56008146 + | NM_001142921 | Tcf7l2 | 125653 | 55941953 | 55942153 |
| 19 | 55816300 | 56008146 + | NM_001142921 | Tcf7l2 | 141021 | 55957321 | 55957521 |
| 19 | 55816300 | 56008146 + | NM_001142921 | Tcf7l2 | 124080 | 55940380 | 55940580 |
| 19 | 55816300 | 56008146 + | NM_001142921 | Tcf7l2 | 112740 | 55929040 | 55929240 |
| 19 | 55816300 | 56008146 + | NM_001142921 | Tcf7l2 | 118242 | 55934542 | 55934742 |

|    |          |            |              |        |        |          |          |
|----|----------|------------|--------------|--------|--------|----------|----------|
| 19 | 55816300 | 56008146 + | NM_001142921 | Tcf7l2 | 108662 | 55924962 | 55925162 |
| 19 | 55816300 | 56008146 + | NM_001142921 | Tcf7l2 | 86060  | 55902360 | 55902560 |
| 19 | 55816300 | 56008146 + | NM_001142921 | Tcf7l2 | 51609  | 55867909 | 55868109 |
| 19 | 55816300 | 56008146 + | NM_001142921 | Tcf7l2 | 64868  | 55881168 | 55881368 |
| 19 | 55816300 | 56008146 + | NM_001142921 | Tcf7l2 | 14939  | 55831239 | 55831439 |
| 19 | 55816300 | 56008146 + | NM_001142922 | Tcf7l2 | 83621  | 55899921 | 55900121 |
| 19 | 55816300 | 56008146 + | NM_001142922 | Tcf7l2 | 123115 | 55939415 | 55939615 |
| 19 | 55816300 | 56008146 + | NM_001142922 | Tcf7l2 | 125653 | 55941953 | 55942153 |
| 19 | 55816300 | 56008146 + | NM_001142922 | Tcf7l2 | 141021 | 55957321 | 55957521 |
| 19 | 55816300 | 56008146 + | NM_001142922 | Tcf7l2 | 124080 | 55940380 | 55940580 |
| 19 | 55816300 | 56008146 + | NM_001142922 | Tcf7l2 | 112740 | 55929040 | 55929240 |
| 19 | 55816300 | 56008146 + | NM_001142922 | Tcf7l2 | 118242 | 55934542 | 55934742 |
| 19 | 55816300 | 56008146 + | NM_001142922 | Tcf7l2 | 108662 | 55924962 | 55925162 |
| 19 | 55816300 | 56008146 + | NM_001142922 | Tcf7l2 | 86060  | 55902360 | 55902560 |
| 19 | 55816300 | 56008146 + | NM_001142922 | Tcf7l2 | 51609  | 55867909 | 55868109 |
| 19 | 55816300 | 56008146 + | NM_001142922 | Tcf7l2 | 64868  | 55881168 | 55881368 |
| 19 | 55816300 | 56008146 + | NM_001142922 | Tcf7l2 | 14939  | 55831239 | 55831439 |
| 19 | 55816300 | 56008146 + | NM_001142923 | Tcf7l2 | 83621  | 55899921 | 55900121 |
| 19 | 55816300 | 56008146 + | NM_001142923 | Tcf7l2 | 123115 | 55939415 | 55939615 |
| 19 | 55816300 | 56008146 + | NM_001142923 | Tcf7l2 | 125653 | 55941953 | 55942153 |
| 19 | 55816300 | 56008146 + | NM_001142923 | Tcf7l2 | 141021 | 55957321 | 55957521 |
| 19 | 55816300 | 56008146 + | NM_001142923 | Tcf7l2 | 124080 | 55940380 | 55940580 |
| 19 | 55816300 | 56008146 + | NM_001142923 | Tcf7l2 | 112740 | 55929040 | 55929240 |
| 19 | 55816300 | 56008146 + | NM_001142923 | Tcf7l2 | 118242 | 55934542 | 55934742 |
| 19 | 55816300 | 56008146 + | NM_001142923 | Tcf7l2 | 108662 | 55924962 | 55925162 |
| 19 | 55816300 | 56008146 + | NM_001142923 | Tcf7l2 | 86060  | 55902360 | 55902560 |
| 19 | 55816300 | 56008146 + | NM_001142923 | Tcf7l2 | 51609  | 55867909 | 55868109 |
| 19 | 55816300 | 56008146 + | NM_001142923 | Tcf7l2 | 64868  | 55881168 | 55881368 |
| 19 | 55816300 | 56008146 + | NM_001142923 | Tcf7l2 | 14939  | 55831239 | 55831439 |
| 19 | 55816300 | 56008146 + | NM_009333    | Tcf7l2 | 83621  | 55899921 | 55900121 |

|    |          |            |              |         |        |          |          |
|----|----------|------------|--------------|---------|--------|----------|----------|
| 19 | 55816300 | 56008146 + | NM_009333    | Tcf7l2  | 123115 | 55939415 | 55939615 |
| 19 | 55816300 | 56008146 + | NM_009333    | Tcf7l2  | 125653 | 55941953 | 55942153 |
| 19 | 55816300 | 56008146 + | NM_009333    | Tcf7l2  | 141021 | 55957321 | 55957521 |
| 19 | 55816300 | 56008146 + | NM_009333    | Tcf7l2  | 124080 | 55940380 | 55940580 |
| 19 | 55816300 | 56008146 + | NM_009333    | Tcf7l2  | 112740 | 55929040 | 55929240 |
| 19 | 55816300 | 56008146 + | NM_009333    | Tcf7l2  | 118242 | 55934542 | 55934742 |
| 19 | 55816300 | 56008146 + | NM_009333    | Tcf7l2  | 108662 | 55924962 | 55925162 |
| 19 | 55816300 | 56008146 + | NM_009333    | Tcf7l2  | 86060  | 55902360 | 55902560 |
| 19 | 55816300 | 56008146 + | NM_009333    | Tcf7l2  | 51609  | 55867909 | 55868109 |
| 19 | 55816300 | 56008146 + | NM_009333    | Tcf7l2  | 64868  | 55881168 | 55881368 |
| 19 | 55816300 | 56008146 + | NM_009333    | Tcf7l2  | 14939  | 55831239 | 55831439 |
| 19 | 56394531 | 56464529 - | NM_001286552 | Nrap    | -1608  | 56466137 | 56466337 |
| 19 | 56394531 | 56464529 - | NM_001286552 | Nrap    | -7835  | 56472364 | 56472564 |
| 19 | 56394531 | 56464529 - | NM_008733    | Nrap    | -1608  | 56466137 | 56466337 |
| 19 | 56394531 | 56464529 - | NM_008733    | Nrap    | -7835  | 56472364 | 56472564 |
| 19 | 56394531 | 56464529 - | NM_198059    | Nrap    | -1608  | 56466137 | 56466337 |
| 19 | 56394531 | 56464529 - | NM_198059    | Nrap    | -7835  | 56472364 | 56472564 |
| 19 | 56471619 | 56516834 + | NM_007611    | Casp7   | -5282  | 56466137 | 56466337 |
| 19 | 56471619 | 56516834 + | NM_007611    | Casp7   | 23463  | 56495082 | 56495282 |
| 19 | 56471619 | 56516834 + | NM_007611    | Casp7   | 41948  | 56513567 | 56513767 |
| 19 | 56471619 | 56516834 + | NM_007611    | Casp7   | 745    | 56472364 | 56472564 |
| 19 | 56603651 | 56622713 - | NM_018831    | Dclre1a | -1302  | 56624015 | 56624215 |
| 19 | 56622751 | 56673337 + | NM_025811    | Nhlrc2  | 1264   | 56624015 | 56624215 |
| 19 | 56622751 | 56673337 + | NM_025811    | Nhlrc2  | 39953  | 56662704 | 56662904 |
| 19 | 56622751 | 56673337 + | NM_025811    | Nhlrc2  | 13992  | 56636743 | 56636943 |
| 19 | 56865453 | 56888174 - | NM_170757    | Ccdc186 | -2584  | 56890758 | 56890958 |
| 19 | 56900699 | 56944503 + | NM_001002238 | Tdrd1   | 41359  | 56942058 | 56942258 |
| 19 | 56900699 | 56944503 + | NM_001002238 | Tdrd1   | -9741  | 56890758 | 56890958 |
| 19 | 56900765 | 56944503 + | NM_001002240 | Tdrd1   | 41293  | 56942058 | 56942258 |
| 19 | 56900765 | 56944503 + | NM_001002240 | Tdrd1   | -9807  | 56890758 | 56890958 |



|    |          |            |              |               |       |          |          |
|----|----------|------------|--------------|---------------|-------|----------|----------|
| 19 | 56900776 | 56944503 + | NM_031387    | Tdrd1         | 41282 | 56942058 | 56942258 |
| 19 | 56900776 | 56944503 + | NM_031387    | Tdrd1         | -9818 | 56890758 | 56890958 |
| 19 | 56905202 | 56944503 + | NM_001002241 | Tdrd1         | 36856 | 56942058 | 56942258 |
| 19 | 56948906 | 56986569 + | NM_172840    | Vwa2          | -6648 | 56942058 | 56942258 |
| 19 | 57107754 | 57272122 - | NM_001103177 | Ablim1        | 23495 | 57248427 | 57248627 |
| 19 | 57107754 | 57290523 - | NM_001290813 | Ablim1        | 41896 | 57248427 | 57248627 |
| 19 | 57107754 | 57272122 - | NM_001290815 | Ablim1        | 23495 | 57248427 | 57248627 |
| 19 | 57107754 | 57272122 - | NM_001290816 | Ablim1        | 23495 | 57248427 | 57248627 |
| 19 | 57107754 | 57290523 - | NM_178688    | Ablim1        | 41896 | 57248427 | 57248627 |
| 19 | 57348450 | 57351543 + | NR_045319    | 4930449E18Rik | -395  | 57347855 | 57348055 |
| 19 | 57397687 | 57435390 - | NR_040316    | B230217O12Rik | 26426 | 57408764 | 57408964 |
| 19 | 57397687 | 57435390 - | NR_040316    | B230217O12Rik | 18546 | 57416644 | 57416844 |
| 19 | 57397687 | 57435390 - | NR_040316    | B230217O12Rik | -7138 | 57442528 | 57442728 |
| 19 | 57397687 | 57435390 - | NR_040316    | B230217O12Rik | 25800 | 57409390 | 57409590 |
| 19 | 57397687 | 57435390 - | NR_040316    | B230217O12Rik | 31196 | 57403994 | 57404194 |
| 19 | 57435499 | 57464085 + | NM_145505    | Fam160b1      | 7029  | 57442528 | 57442728 |
| 19 | 57685524 | 58207831 + | NM_181415    | Atrnl1        | 1268  | 57686792 | 57686992 |
| 19 | 58310071 | 58529889 - | NM_010279    | Gfra1         | 69623 | 58460066 | 58460266 |
| 19 | 58310071 | 58529889 - | NR_104342    | Gfra1         | 69623 | 58460066 | 58460266 |
| 19 | 58310095 | 58529085 - | NM_001285457 | Gfra1         | 68819 | 58460066 | 58460266 |
| 19 | 58773407 | 58775814 + | NR_038140    | 1810018F18Rik | -9678 | 58763529 | 58763729 |
| 19 | 58834213 | 58852025 + | NM_011128    | Pnliprp2      | -452  | 58833561 | 58833761 |
| 19 | 58870241 | 58935475 - | NM_175199    | Hspa12a       | 7563  | 58927712 | 58927912 |
| 19 | 59370574 | 59420271 - | NM_001033222 | Pdzd8         | 39821 | 59380250 | 59380450 |
| 19 | 59567626 | 59635295 + | NR_045308    | 2700089I24Rik | -6487 | 59560939 | 59561139 |
| 19 | 60965652 | 61168459 + | NM_018869    | Grk5          | 26178 | 60991830 | 60992030 |
| 19 | 60965652 | 61168459 + | NM_018869    | Grk5          | 5393  | 60971045 | 60971245 |
| 19 | 60965652 | 61168459 + | NM_018869    | Grk5          | 16326 | 60981978 | 60982178 |
| 19 | 60965652 | 61168459 + | NM_018869    | Grk5          | -4531 | 60960921 | 60961121 |
| 19 | 61129743 | 61216744 - | NR_131953    | Zfp950        | -6828 | 61223572 | 61223772 |

|    |          |            |              |        |        |          |          |
|----|----------|------------|--------------|--------|--------|----------|----------|
| 19 | 61129743 | 61216744 - | NR_131953    | Zfp950 | 24529  | 61192015 | 61192215 |
| 19 | 61190885 | 61216744 - | NM_001309195 | Zfp950 | -6828  | 61223572 | 61223772 |
| 19 | 61190885 | 61216744 - | NM_001309195 | Zfp950 | 24529  | 61192015 | 61192215 |
| 19 | 61190885 | 61216744 - | NR_131954    | Zfp950 | -6828  | 61223572 | 61223772 |
| 19 | 61190885 | 61216744 - | NR_131954    | Zfp950 | 24529  | 61192015 | 61192215 |
| 19 | 61190885 | 61216744 - | NR_131955    | Zfp950 | -6828  | 61223572 | 61223772 |
| 19 | 61190885 | 61216744 - | NR_131955    | Zfp950 | 24529  | 61192015 | 61192215 |
| 19 | 61190885 | 61216744 - | NR_131956    | Zfp950 | -6828  | 61223572 | 61223772 |
| 19 | 61190885 | 61216744 - | NR_131956    | Zfp950 | 24529  | 61192015 | 61192215 |
| 19 | 61194034 | 61216744 - | NM_001309216 | Zfp950 | -6828  | 61223572 | 61223772 |
| 19 | 61198330 | 61216744 - | NM_001001737 | Zfp950 | -6828  | 61223572 | 61223772 |
| 19 | 61300305 | 61304322 - | NM_009970    | Csf2ra | 3907   | 61300215 | 61300415 |
| 2  | 4073909  | 4535090 +  | NM_172475    | Frmd4a | 235341 | 4309250  | 4309450  |
| 2  | 4638877  | 4723193 +  | NM_001190400 | Bend7  | 3506   | 4642383  | 4642583  |
| 2  | 4638877  | 4723193 +  | NM_001190400 | Bend7  | 5356   | 4644233  | 4644433  |
| 2  | 4638877  | 4723193 +  | NM_178663    | Bend7  | 3506   | 4642383  | 4642583  |
| 2  | 4638877  | 4723193 +  | NM_178663    | Bend7  | 5356   | 4644233  | 4644433  |
| 2  | 4840042  | 4859790 +  | NM_010726    | Phyh   | -1058  | 4838784  | 4838984  |
| 2  | 4941688  | 4984985 -  | NM_181848    | Optrn  | 6241   | 4978544  | 4978744  |
| 2  | 4941688  | 4984985 -  | NM_181848    | Optrn  | -574   | 4985559  | 4985759  |
| 2  | 4941688  | 4984985 -  | NM_181848    | Optrn  | 854    | 4983931  | 4984131  |
| 2  | 4941688  | 4984985 -  | NM_181848    | Optrn  | 23070  | 4961715  | 4961915  |
| 2  | 5214503  | 5635809 -  | NM_001290374 | Camk1d | 165120 | 5470489  | 5470689  |
| 2  | 5214503  | 5635809 -  | NM_001290374 | Camk1d | 1448   | 5634161  | 5634361  |
| 2  | 5214503  | 5635809 -  | NM_001290374 | Camk1d | 114042 | 5521567  | 5521767  |
| 2  | 5214503  | 5635809 -  | NM_001290374 | Camk1d | 73579  | 5562030  | 5562230  |
| 2  | 5214503  | 5635809 -  | NM_001290374 | Camk1d | 31344  | 5604265  | 5604465  |
| 2  | 5214503  | 5635809 -  | NM_001290374 | Camk1d | 99404  | 5536205  | 5536405  |
| 2  | 5214503  | 5635809 -  | NM_001290374 | Camk1d | 150873 | 5484736  | 5484936  |
| 2  | 5214503  | 5635809 -  | NM_001290374 | Camk1d | 118747 | 5516862  | 5517062  |

|   |         |           |              |        |        |         |         |
|---|---------|-----------|--------------|--------|--------|---------|---------|
| 2 | 5214503 | 5635809 - | NM_001290374 | Camk1d | 152030 | 5483579 | 5483779 |
| 2 | 5214503 | 5635809 - | NM_001290374 | Camk1d | 365195 | 5270414 | 5270614 |
| 2 | 5214503 | 5635809 - | NM_001290374 | Camk1d | 294523 | 5341086 | 5341286 |
| 2 | 5214503 | 5635809 - | NM_001290374 | Camk1d | 258235 | 5377374 | 5377574 |
| 2 | 5214503 | 5635809 - | NM_001290374 | Camk1d | 335329 | 5300280 | 5300480 |
| 2 | 5214503 | 5635809 - | NM_001290374 | Camk1d | 398247 | 5237362 | 5237562 |
| 2 | 5214503 | 5635809 - | NM_001290375 | Camk1d | 165120 | 5470489 | 5470689 |
| 2 | 5214503 | 5635809 - | NM_001290375 | Camk1d | 1448   | 5634161 | 5634361 |
| 2 | 5214503 | 5635809 - | NM_001290375 | Camk1d | 114042 | 5521567 | 5521767 |
| 2 | 5214503 | 5635809 - | NM_001290375 | Camk1d | 73579  | 5562030 | 5562230 |
| 2 | 5214503 | 5635809 - | NM_001290375 | Camk1d | 31344  | 5604265 | 5604465 |
| 2 | 5214503 | 5635809 - | NM_001290375 | Camk1d | 99404  | 5536205 | 5536405 |
| 2 | 5214503 | 5635809 - | NM_001290375 | Camk1d | 150873 | 5484736 | 5484936 |
| 2 | 5214503 | 5635809 - | NM_001290375 | Camk1d | 118747 | 5516862 | 5517062 |
| 2 | 5214503 | 5635809 - | NM_001290375 | Camk1d | 152030 | 5483579 | 5483779 |
| 2 | 5214503 | 5635809 - | NM_001290375 | Camk1d | 365195 | 5270414 | 5270614 |
| 2 | 5214503 | 5635809 - | NM_001290375 | Camk1d | 294523 | 5341086 | 5341286 |
| 2 | 5214503 | 5635809 - | NM_001290375 | Camk1d | 258235 | 5377374 | 5377574 |
| 2 | 5214503 | 5635809 - | NM_001290375 | Camk1d | 335329 | 5300280 | 5300480 |
| 2 | 5214503 | 5635809 - | NM_001290375 | Camk1d | 398247 | 5237362 | 5237562 |
| 2 | 5214503 | 5597093 - | NM_001290376 | Camk1d | 126404 | 5470489 | 5470689 |
| 2 | 5214503 | 5597093 - | NM_001290376 | Camk1d | 75326  | 5521567 | 5521767 |
| 2 | 5214503 | 5597093 - | NM_001290376 | Camk1d | 34863  | 5562030 | 5562230 |
| 2 | 5214503 | 5597093 - | NM_001290376 | Camk1d | -7172  | 5604265 | 5604465 |
| 2 | 5214503 | 5597093 - | NM_001290376 | Camk1d | 60688  | 5536205 | 5536405 |
| 2 | 5214503 | 5597093 - | NM_001290376 | Camk1d | 112157 | 5484736 | 5484936 |
| 2 | 5214503 | 5597093 - | NM_001290376 | Camk1d | 80031  | 5516862 | 5517062 |
| 2 | 5214503 | 5597093 - | NM_001290376 | Camk1d | 113314 | 5483579 | 5483779 |
| 2 | 5214503 | 5597093 - | NM_001290376 | Camk1d | 326479 | 5270414 | 5270614 |
| 2 | 5214503 | 5597093 - | NM_001290376 | Camk1d | 255807 | 5341086 | 5341286 |

|   |         |           |              |               |        |         |         |
|---|---------|-----------|--------------|---------------|--------|---------|---------|
| 2 | 5214503 | 5597093 - | NM_001290376 | Camk1d        | 219519 | 5377374 | 5377574 |
| 2 | 5214503 | 5597093 - | NM_001290376 | Camk1d        | 296613 | 5300280 | 5300480 |
| 2 | 5214503 | 5597093 - | NM_001290376 | Camk1d        | 359531 | 5237362 | 5237562 |
| 2 | 5214503 | 5635809 - | NM_177343    | Camk1d        | 165120 | 5470489 | 5470689 |
| 2 | 5214503 | 5635809 - | NM_177343    | Camk1d        | 1448   | 5634161 | 5634361 |
| 2 | 5214503 | 5635809 - | NM_177343    | Camk1d        | 114042 | 5521567 | 5521767 |
| 2 | 5214503 | 5635809 - | NM_177343    | Camk1d        | 73579  | 5562030 | 5562230 |
| 2 | 5214503 | 5635809 - | NM_177343    | Camk1d        | 31344  | 5604265 | 5604465 |
| 2 | 5214503 | 5635809 - | NM_177343    | Camk1d        | 99404  | 5536205 | 5536405 |
| 2 | 5214503 | 5635809 - | NM_177343    | Camk1d        | 150873 | 5484736 | 5484936 |
| 2 | 5214503 | 5635809 - | NM_177343    | Camk1d        | 118747 | 5516862 | 5517062 |
| 2 | 5214503 | 5635809 - | NM_177343    | Camk1d        | 152030 | 5483579 | 5483779 |
| 2 | 5214503 | 5635809 - | NM_177343    | Camk1d        | 365195 | 5270414 | 5270614 |
| 2 | 5214503 | 5635809 - | NM_177343    | Camk1d        | 294523 | 5341086 | 5341286 |
| 2 | 5214503 | 5635809 - | NM_177343    | Camk1d        | 258235 | 5377374 | 5377574 |
| 2 | 5214503 | 5635809 - | NM_177343    | Camk1d        | 335329 | 5300280 | 5300480 |
| 2 | 5214503 | 5635809 - | NM_177343    | Camk1d        | 398247 | 5237362 | 5237562 |
| 2 | 5715340 | 5766007 - | NM_133837    | Cdc123        | -3537  | 5769544 | 5769744 |
| 2 | 5715340 | 5766007 - | NM_133837    | Cdc123        | -6296  | 5772303 | 5772503 |
| 2 | 5766080 | 5789783 + | NM_016918    | Nudt5         | 3464   | 5769544 | 5769744 |
| 2 | 5766080 | 5789783 + | NM_016918    | Nudt5         | 6223   | 5772303 | 5772503 |
| 2 | 6114297 | 6242658 + | NR_040333    | A230108P19Rik | -5361  | 6108736 | 6108936 |
| 2 | 6243803 | 6364867 + | NM_001080548 | Usp6nl        | 55405  | 6299208 | 6299408 |
| 2 | 6243803 | 6364867 + | NM_001080548 | Usp6nl        | 30043  | 6273846 | 6274046 |
| 2 | 6273782 | 6364867 + | NM_181399    | Usp6nl        | 25426  | 6299208 | 6299408 |
| 2 | 6273782 | 6364867 + | NM_181399    | Usp6nl        | 64     | 6273846 | 6274046 |
| 2 | 6460744 | 6806043 - | NM_001110228 | Celf2         | 164149 | 6641694 | 6641894 |
| 2 | 6460744 | 7002349 - | NM_001110229 | Celf2         | 360455 | 6641694 | 6641894 |
| 2 | 6460744 | 7002349 - | NM_001110230 | Celf2         | 360455 | 6641694 | 6641894 |
| 2 | 6460744 | 7317826 - | NM_001110231 | Celf2         | 145523 | 7172103 | 7172303 |

|   |          |            |              |               |        |          |          |
|---|----------|------------|--------------|---------------|--------|----------|----------|
| 2 | 6460744  | 7317826 -  | NM_001110231 | Celf2         | 675932 | 6641694  | 6641894  |
| 2 | 6460744  | 7317628 -  | NM_001110232 | Celf2         | 145325 | 7172103  | 7172303  |
| 2 | 6460744  | 7317628 -  | NM_001110232 | Celf2         | 675734 | 6641694  | 6641894  |
| 2 | 6460744  | 7002349 -  | NM_001160292 | Celf2         | 360455 | 6641694  | 6641894  |
| 2 | 6460744  | 6806043 -  | NM_001160293 | Celf2         | 164149 | 6641694  | 6641894  |
| 2 | 6460744  | 6806043 -  | NM_010160    | Celf2         | 164149 | 6641694  | 6641894  |
| 2 | 6460745  | 6642709 -  | NM_001310447 | Celf2         | 815    | 6641694  | 6641894  |
| 2 | 9778705  | 9800228 -  | NM_008091    | Gata3         | -701   | 9800929  | 9801129  |
| 2 | 9802873  | 9808395 +  | NR_024257    | 4930412O13Rik | -1744  | 9800929  | 9801129  |
| 2 | 9836179  | 9970237 -  | NM_027748    | Taf3          | 11317  | 9958720  | 9958920  |
| 2 | 9836179  | 9970237 -  | NM_027748    | Taf3          | 129550 | 9840487  | 9840687  |
| 2 | 9836179  | 9970237 -  | NM_027748    | Taf3          | 127020 | 9843017  | 9843217  |
| 2 | 11094009 | 11222854 + | NM_008859    | Prkcq         | 89393  | 11183402 | 11183602 |
| 2 | 11259993 | 11320128 - | NR_040615    | 8030442B05Rik | -4189  | 11324317 | 11324517 |
| 2 | 11261116 | 11265734 + | NR_040369    | Gm13293       | -9677  | 11251239 | 11251439 |
| 2 | 11564419 | 11614822 + | NM_008367    | Il2ra         | 8645   | 11573064 | 11573264 |
| 2 | 12845668 | 12925082 + | NM_001305436 | Pter          | 32736  | 12878404 | 12878604 |
| 2 | 12845668 | 12925082 + | NM_001305437 | Pter          | 32736  | 12878404 | 12878604 |
| 2 | 12845668 | 12925082 + | NM_008961    | Pter          | 32736  | 12878404 | 12878604 |
| 2 | 13197965 | 13413504 - | NM_001081084 | Cubn          | 154131 | 13259173 | 13259373 |
| 2 | 13197965 | 13413504 - | NM_001081084 | Cubn          | 9330   | 13403974 | 13404174 |
| 2 | 13197965 | 13413504 - | NM_001081084 | Cubn          | -5485  | 13418989 | 13419189 |
| 2 | 13197965 | 13413504 - | NM_001081084 | Cubn          | 7168   | 13406136 | 13406336 |
| 2 | 13197965 | 13413504 - | NM_001081084 | Cubn          | 21381  | 13391923 | 13392123 |
| 2 | 13197965 | 13413504 - | NM_001081084 | Cubn          | 12392  | 13400912 | 13401112 |
| 2 | 13197965 | 13413504 - | NM_001081084 | Cubn          | 37378  | 13375926 | 13376126 |
| 2 | 13431788 | 13466292 - | NM_010067    | Trdmt1        | 22105  | 13443987 | 13444187 |
| 2 | 13431788 | 13466292 - | NM_010067    | Trdmt1        | 1809   | 13464283 | 13464483 |
| 2 | 13431788 | 13466292 - | NM_010067    | Trdmt1        | 20890  | 13445202 | 13445402 |
| 2 | 13431788 | 13466292 - | NM_010067    | Trdmt1        | 31451  | 13434641 | 13434841 |

|   |          |            |              |         |        |          |          |
|---|----------|------------|--------------|---------|--------|----------|----------|
| 2 | 13991960 | 13995562 - | NR_038162    | Stamos  | 354    | 13995008 | 13995208 |
| 2 | 13995739 | 14069958 + | NM_011484    | Stam    | -531   | 13995008 | 13995208 |
| 2 | 14096151 | 14143621 + | NM_001081310 | Tmem236 | 4043   | 14100194 | 14100394 |
| 2 | 14096151 | 14143621 + | NM_001081310 | Tmem236 | 41435  | 14137586 | 14137786 |
| 2 | 14096151 | 14143621 + | NM_001081310 | Tmem236 | 2360   | 14098511 | 14098711 |
| 2 | 14151041 | 14253651 + | NM_008625    | Mrc1    | 48473  | 14199514 | 14199714 |
| 2 | 14525933 | 14909536 + | NM_023116    | Cacnb2  | 356955 | 14882888 | 14883088 |
| 2 | 14525933 | 14909536 + | NM_023116    | Cacnb2  | 300631 | 14826564 | 14826764 |
| 2 | 14745719 | 14909536 + | NM_001252533 | Cacnb2  | 137169 | 14882888 | 14883088 |
| 2 | 14745719 | 14909536 + | NM_001252533 | Cacnb2  | 80845  | 14826564 | 14826764 |
| 2 | 14795283 | 14909536 + | NM_001309519 | Cacnb2  | 87605  | 14882888 | 14883088 |
| 2 | 14795283 | 14909536 + | NM_001309519 | Cacnb2  | 31281  | 14826564 | 14826764 |
| 2 | 16277931 | 16677467 + | NM_026162    | Plxdc2  | 326698 | 16604629 | 16604829 |
| 2 | 17976864 | 18134018 + | NM_010804    | Mllt10  | 83127  | 18059991 | 18060191 |
| 2 | 17976864 | 18134018 + | NM_010804    | Mllt10  | 133732 | 18110596 | 18110796 |
| 2 | 17976864 | 18134018 + | NM_010804    | Mllt10  | 65895  | 18042759 | 18042959 |
| 2 | 17986212 | 18134018 + | NM_001252560 | Mllt10  | 73779  | 18059991 | 18060191 |
| 2 | 17986212 | 18134018 + | NM_001252560 | Mllt10  | 124384 | 18110596 | 18110796 |
| 2 | 17986212 | 18134018 + | NM_001252560 | Mllt10  | 56547  | 18042759 | 18042959 |
| 2 | 17986212 | 18134018 + | NM_001252561 | Mllt10  | 73779  | 18059991 | 18060191 |
| 2 | 17986212 | 18134018 + | NM_001252561 | Mllt10  | 124384 | 18110596 | 18110796 |
| 2 | 17986212 | 18134018 + | NM_001252561 | Mllt10  | 56547  | 18042759 | 18042959 |
| 2 | 17986212 | 18134018 + | NR_045538    | Mllt10  | 73779  | 18059991 | 18060191 |
| 2 | 17986212 | 18134018 + | NR_045538    | Mllt10  | 124384 | 18110596 | 18110796 |
| 2 | 17986212 | 18134018 + | NR_045538    | Mllt10  | 56547  | 18042759 | 18042959 |
| 2 | 17986212 | 18134018 + | NR_045539    | Mllt10  | 73779  | 18059991 | 18060191 |
| 2 | 17986212 | 18134018 + | NR_045539    | Mllt10  | 124384 | 18110596 | 18110796 |
| 2 | 17986212 | 18134018 + | NR_045539    | Mllt10  | 56547  | 18042759 | 18042959 |
| 2 | 18720875 | 18723446 - | NR_131254    | Carlr   | 988    | 18722258 | 18722458 |
| 2 | 19293263 | 19316598 + | NM_029619    | Msrp2   | 13957  | 19307220 | 19307420 |

|   |          |            |              |      |        |          |          |
|---|----------|------------|--------------|------|--------|----------|----------|
| 2 | 20211540 | 20732163 + | NM_001081006 | Etl4 | 446009 | 20657549 | 20657749 |
| 2 | 20211540 | 20732163 + | NM_001081006 | Etl4 | 471559 | 20683099 | 20683299 |
| 2 | 20211540 | 20732163 + | NM_001081006 | Etl4 | 469281 | 20680821 | 20681021 |
| 2 | 20211540 | 20732163 + | NM_001081006 | Etl4 | 399619 | 20611159 | 20611359 |
| 2 | 20211540 | 20732163 + | NM_001081006 | Etl4 | 438949 | 20650489 | 20650689 |
| 2 | 20211540 | 20732163 + | NM_001081006 | Etl4 | 445271 | 20656811 | 20657011 |
| 2 | 20211540 | 20732163 + | NM_001081006 | Etl4 | 402972 | 20614512 | 20614712 |
| 2 | 20211540 | 20732163 + | NM_001081006 | Etl4 | 242744 | 20454284 | 20454484 |
| 2 | 20211540 | 20732163 + | NM_001081006 | Etl4 | 273242 | 20484782 | 20484982 |
| 2 | 20431674 | 20732163 + | NM_029895    | Etl4 | 225875 | 20657549 | 20657749 |
| 2 | 20431674 | 20732163 + | NM_029895    | Etl4 | 251425 | 20683099 | 20683299 |
| 2 | 20431674 | 20732163 + | NM_029895    | Etl4 | 249147 | 20680821 | 20681021 |
| 2 | 20431674 | 20732163 + | NM_029895    | Etl4 | 179485 | 20611159 | 20611359 |
| 2 | 20431674 | 20732163 + | NM_029895    | Etl4 | 218815 | 20650489 | 20650689 |
| 2 | 20431674 | 20732163 + | NM_029895    | Etl4 | 225137 | 20656811 | 20657011 |
| 2 | 20431674 | 20732163 + | NM_029895    | Etl4 | 182838 | 20614512 | 20614712 |
| 2 | 20431674 | 20732163 + | NM_029895    | Etl4 | 22610  | 20454284 | 20454484 |
| 2 | 20431674 | 20732163 + | NM_029895    | Etl4 | 53108  | 20484782 | 20484982 |
| 2 | 20431674 | 20732163 + | NM_178059    | Etl4 | 225875 | 20657549 | 20657749 |
| 2 | 20431674 | 20732163 + | NM_178059    | Etl4 | 251425 | 20683099 | 20683299 |
| 2 | 20431674 | 20732163 + | NM_178059    | Etl4 | 249147 | 20680821 | 20681021 |
| 2 | 20431674 | 20732163 + | NM_178059    | Etl4 | 179485 | 20611159 | 20611359 |
| 2 | 20431674 | 20732163 + | NM_178059    | Etl4 | 218815 | 20650489 | 20650689 |
| 2 | 20431674 | 20732163 + | NM_178059    | Etl4 | 225137 | 20656811 | 20657011 |
| 2 | 20431674 | 20732163 + | NM_178059    | Etl4 | 182838 | 20614512 | 20614712 |
| 2 | 20431674 | 20732163 + | NM_178059    | Etl4 | 22610  | 20454284 | 20454484 |
| 2 | 20431674 | 20732163 + | NM_178059    | Etl4 | 53108  | 20484782 | 20484982 |
| 2 | 20441140 | 20732163 + | NM_001177630 | Etl4 | 216409 | 20657549 | 20657749 |
| 2 | 20441140 | 20732163 + | NM_001177630 | Etl4 | 241959 | 20683099 | 20683299 |
| 2 | 20441140 | 20732163 + | NM_001177630 | Etl4 | 239681 | 20680821 | 20681021 |

|   |          |            |              |          |        |          |          |
|---|----------|------------|--------------|----------|--------|----------|----------|
| 2 | 20441140 | 20732163 + | NM_001177630 | Etl4     | 170019 | 20611159 | 20611359 |
| 2 | 20441140 | 20732163 + | NM_001177630 | Etl4     | 209349 | 20650489 | 20650689 |
| 2 | 20441140 | 20732163 + | NM_001177630 | Etl4     | 215671 | 20656811 | 20657011 |
| 2 | 20441140 | 20732163 + | NM_001177630 | Etl4     | 173372 | 20614512 | 20614712 |
| 2 | 20441140 | 20732163 + | NM_001177630 | Etl4     | 13144  | 20454284 | 20454484 |
| 2 | 20441140 | 20732163 + | NM_001177630 | Etl4     | 43642  | 20484782 | 20484982 |
| 2 | 20441140 | 20732163 + | NM_001177631 | Etl4     | 216409 | 20657549 | 20657749 |
| 2 | 20441140 | 20732163 + | NM_001177631 | Etl4     | 241959 | 20683099 | 20683299 |
| 2 | 20441140 | 20732163 + | NM_001177631 | Etl4     | 239681 | 20680821 | 20681021 |
| 2 | 20441140 | 20732163 + | NM_001177631 | Etl4     | 170019 | 20611159 | 20611359 |
| 2 | 20441140 | 20732163 + | NM_001177631 | Etl4     | 209349 | 20650489 | 20650689 |
| 2 | 20441140 | 20732163 + | NM_001177631 | Etl4     | 215671 | 20656811 | 20657011 |
| 2 | 20441140 | 20732163 + | NM_001177631 | Etl4     | 173372 | 20614512 | 20614712 |
| 2 | 20441140 | 20732163 + | NM_001177631 | Etl4     | 13144  | 20454284 | 20454484 |
| 2 | 20441140 | 20732163 + | NM_001177631 | Etl4     | 43642  | 20484782 | 20484982 |
| 2 | 20769546 | 20889349 - | NM_001081364 | Arhgap21 | 6842   | 20882307 | 20882507 |
| 2 | 20769546 | 20889349 - | NM_001081364 | Arhgap21 | 30651  | 20858498 | 20858698 |
| 2 | 20769546 | 20889349 - | NM_001128084 | Arhgap21 | 6842   | 20882307 | 20882507 |
| 2 | 20769546 | 20889349 - | NM_001128084 | Arhgap21 | 30651  | 20858498 | 20858698 |
| 2 | 20890501 | 20891976 + | NR_033225    | Gm13375  | -7994  | 20882307 | 20882507 |
| 2 | 21102358 | 21126993 - | NM_027728    | Enkur    | -5     | 21126998 | 21127198 |
| 2 | 21127351 | 21136637 + | NM_001001297 | Thnsl1   | -153   | 21126998 | 21127198 |
| 2 | 21127351 | 21136637 + | NM_177588    | Thnsl1   | -153   | 21126998 | 21127198 |
| 2 | 22629847 | 22731174 + | NM_019456    | Apbb1ip  | 68105  | 22697952 | 22698152 |
| 2 | 22751042 | 22795780 + | NM_019501    | Pdss1    | 15611  | 22766653 | 22766853 |
| 2 | 22751042 | 22795780 + | NM_019501    | Pdss1    | -146   | 22750696 | 22750896 |
| 2 | 22795509 | 22895762 - | NM_001077190 | Abi1     | -269   | 22896031 | 22896231 |
| 2 | 22795509 | 22895762 - | NM_001077192 | Abi1     | -269   | 22896031 | 22896231 |
| 2 | 22795509 | 22895762 - | NM_001077193 | Abi1     | -269   | 22896031 | 22896231 |
| 2 | 22795509 | 22895762 - | NM_007380    | Abi1     | -269   | 22896031 | 22896231 |



|   |          |            |              |               |       |          |          |
|---|----------|------------|--------------|---------------|-------|----------|----------|
| 2 | 22795509 | 22895762 - | NM_145994    | Abi1          | -269  | 22896031 | 22896231 |
| 2 | 23365574 | 23427625 - | NM_001165997 | Spopl         | -312  | 23427937 | 23428137 |
| 2 | 23365574 | 23427625 - | NM_001165998 | Spopl         | -312  | 23427937 | 23428137 |
| 2 | 23365574 | 23427625 - | NM_029773    | Spopl         | -312  | 23427937 | 23428137 |
| 2 | 24240917 | 24264250 + | NM_177611    | Psd4          | -797  | 24239920 | 24240120 |
| 2 | 24276071 | 24331120 - | NM_011040    | Pax8          | 36175 | 24294745 | 24294945 |
| 2 | 24646289 | 24775130 - | NM_001012518 | Ehmt1         | 48323 | 24726607 | 24726807 |
| 2 | 24646289 | 24775130 - | NM_001109686 | Ehmt1         | 48323 | 24726607 | 24726807 |
| 2 | 24646289 | 24775130 - | NM_001109687 | Ehmt1         | 48323 | 24726607 | 24726807 |
| 2 | 24646289 | 24775130 - | NM_172545    | Ehmt1         | 48323 | 24726607 | 24726807 |
| 2 | 24935843 | 24941240 + | NM_028093    | Entpd8        | -555  | 24935088 | 24935288 |
| 2 | 24941190 | 24950726 - | NM_001163626 | Noxa1         | 0     | 24950700 | 24950900 |
| 2 | 24941190 | 24950726 - | NM_172204    | Noxa1         | 0     | 24950700 | 24950900 |
| 2 | 25036278 | 25038853 + | NM_025980    | Nrarp         | -5259 | 25030819 | 25031019 |
| 2 | 25068079 | 25070151 - | NM_028961    | 4933433C11Rik | -9225 | 25079376 | 25079576 |
| 2 | 25077678 | 25080223 - | NM_146116    | Tubb4b        | -9843 | 25090066 | 25090266 |
| 2 | 25077678 | 25080223 - | NM_146116    | Tubb4b        | 647   | 25079376 | 25079576 |
| 2 | 25084417 | 25089755 - | NM_080854    | Slc34a3       | -311  | 25090066 | 25090266 |
| 2 | 25089996 | 25092308 - | NM_001033410 | Rnf224        | 2042  | 25090066 | 25090266 |
| 2 | 25098449 | 25099782 + | NM_176834    | Rnf208        | -8183 | 25090066 | 25090266 |
| 2 | 25182970 | 25188092 - | NR_027448    | AA543186      | -6    | 25188098 | 25188298 |
| 2 | 25188263 | 25207734 + | NM_001029983 | Man1b1        | 0     | 25188098 | 25188298 |
| 2 | 25207810 | 25211853 - | NM_031843    | Dpp7          | -7474 | 25219327 | 25219527 |
| 2 | 25217012 | 25221147 - | NM_001033293 | Uap1l1        | 1620  | 25219327 | 25219527 |
| 2 | 25217012 | 25221147 - | NM_001033293 | Uap1l1        | -7449 | 25228596 | 25228796 |
| 2 | 25227555 | 25233734 + | NM_001081085 | Sapcd2        | -8028 | 25219327 | 25219527 |
| 2 | 25227555 | 25233734 + | NM_001081085 | Sapcd2        | 1041  | 25228596 | 25228796 |
| 2 | 25227555 | 25233734 + | NM_001290407 | Sapcd2        | -8028 | 25219327 | 25219527 |
| 2 | 25227555 | 25233734 + | NM_001290407 | Sapcd2        | 1041  | 25228596 | 25228796 |
| 2 | 25251394 | 25256844 + | NM_009849    | Entpd2        | 5127  | 25256521 | 25256721 |

|   |          |            |              |          |       |          |          |
|---|----------|------------|--------------|----------|-------|----------|----------|
| 2 | 25258570 | 25265015 + | NM_008721    | Npdc1    | -1849 | 25256521 | 25256721 |
| 2 | 25312363 | 25314293 + | NM_027085    | Clic3    | -5645 | 25306518 | 25306718 |
| 2 | 25346365 | 25349432 - | NM_029958    | Lcn12    | -8941 | 25358373 | 25358573 |
| 2 | 25354170 | 25357240 - | NM_001271777 | C8g      | -1133 | 25358373 | 25358573 |
| 2 | 25354170 | 25356027 - | NM_027062    | C8g      | -2346 | 25358373 | 25358573 |
| 2 | 25356298 | 25360991 + | NM_013908    | Fbxw5    | 2075  | 25358373 | 25358573 |
| 2 | 25373502 | 25402461 - | NM_001290413 | Traf2    | -5077 | 25407538 | 25407738 |
| 2 | 25373502 | 25402461 - | NM_009422    | Traf2    | -5077 | 25407538 | 25407738 |
| 2 | 25413420 | 25417603 + | NM_021519    | Edf1     | -5682 | 25407538 | 25407738 |
| 2 | 25513472 | 25517751 + | NM_001042630 | Lcn5     | 739   | 25514211 | 25514411 |
| 2 | 25513472 | 25517166 + | NM_001276257 | Lcn5     | 739   | 25514211 | 25514411 |
| 2 | 25513472 | 25517166 + | NM_007947    | Lcn5     | 739   | 25514211 | 25514411 |
| 2 | 26264951 | 26300737 - | NM_153125    | Sec16a   | 9521  | 26291016 | 26291216 |
| 2 | 26483977 | 26492018 + | NM_019833    | Fam69b   | -6625 | 26477152 | 26477352 |
| 2 | 26775561 | 26789032 - | NM_011512    | Surf4    | -9820 | 26798852 | 26799052 |
| 2 | 26789589 | 26809017 + | NM_198628    | Stkld1   | 9263  | 26798852 | 26799052 |
| 2 | 26809083 | 26819907 - | NM_207234    | Rexo4    | -332  | 26820239 | 26820439 |
| 2 | 26828936 | 26865146 + | NM_001001322 | Adamts13 | -8497 | 26820239 | 26820439 |
| 2 | 26828936 | 26865146 + | NM_001290463 | Adamts13 | -8497 | 26820239 | 26820439 |
| 2 | 26828936 | 26854101 + | NM_001290464 | Adamts13 | -8497 | 26820239 | 26820439 |
| 2 | 26828936 | 26854101 + | NM_001290465 | Adamts13 | -8497 | 26820239 | 26820439 |
| 2 | 26865446 | 26872370 + | NM_001243239 | Cacfd1   | 3650  | 26869096 | 26869296 |
| 2 | 26865446 | 26872956 + | NM_001243240 | Cacfd1   | 3650  | 26869096 | 26869296 |
| 2 | 26865446 | 26876610 + | NM_029862    | Cacfd1   | 3650  | 26869096 | 26869296 |
| 2 | 26876885 | 26883519 - | NM_172659    | Slc2a6   | 107   | 26883212 | 26883412 |
| 2 | 26876885 | 26883519 - | NM_172659    | Slc2a6   | -576  | 26884095 | 26884295 |
| 2 | 26876887 | 26883519 - | NM_001177627 | Slc2a6   | 107   | 26883212 | 26883412 |
| 2 | 26876887 | 26883519 - | NM_001177627 | Slc2a6   | -576  | 26884095 | 26884295 |
| 2 | 26917156 | 26923389 - | NM_001159602 | Tmem8c   | -7509 | 26930898 | 26931098 |
| 2 | 26917156 | 26927682 - | NM_025376    | Tmem8c   | -3216 | 26930898 | 26931098 |

|   |          |            |              |          |        |          |          |
|---|----------|------------|--------------|----------|--------|----------|----------|
| 2 | 26934901 | 26964134 + | NM_029981    | Adamtsl2 | -3803  | 26930898 | 26931098 |
| 2 | 27119155 | 27282346 - | NM_009500    | Vav2     | 99357  | 27182789 | 27182989 |
| 2 | 27119155 | 27282346 - | NM_009500    | Vav2     | 36775  | 27245371 | 27245571 |
| 2 | 27119155 | 27282346 - | NM_009500    | Vav2     | 76106  | 27206040 | 27206240 |
| 2 | 27301101 | 27331194 - | NM_001113573 | Brd3     | 13479  | 27317515 | 27317715 |
| 2 | 27301101 | 27331194 - | NM_001113574 | Brd3     | 13479  | 27317515 | 27317715 |
| 2 | 27301101 | 27330919 - | NM_023336    | Brd3     | 13204  | 27317515 | 27317715 |
| 2 | 27532721 | 27618840 + | NM_011305    | Rxra     | 38377  | 27571098 | 27571298 |
| 2 | 27532721 | 27618840 + | NM_011305    | Rxra     | 26202  | 27558923 | 27559123 |
| 2 | 27564812 | 27618840 + | NM_001290481 | Rxra     | 6286   | 27571098 | 27571298 |
| 2 | 27564812 | 27618840 + | NM_001290481 | Rxra     | -5689  | 27558923 | 27559123 |
| 2 | 27566103 | 27618840 + | NM_001290482 | Rxra     | 4995   | 27571098 | 27571298 |
| 2 | 27566103 | 27618840 + | NM_001290482 | Rxra     | -6980  | 27558923 | 27559123 |
| 2 | 28464970 | 28477503 - | NM_001160406 | Gfi1b    | -7853  | 28485356 | 28485556 |
| 2 | 28464970 | 28477503 - | NM_008114    | Gfi1b    | -7853  | 28485356 | 28485556 |
| 2 | 29202330 | 29380311 + | NM_026896    | Med27    | 76390  | 29278720 | 29278920 |
| 2 | 29202330 | 29380311 + | NM_026896    | Med27    | 136468 | 29338798 | 29338998 |
| 2 | 29202330 | 29380311 + | NM_026896    | Med27    | 137019 | 29339349 | 29339549 |
| 2 | 29202330 | 29380311 + | NM_026896    | Med27    | 88740  | 29291070 | 29291270 |
| 2 | 29202330 | 29380311 + | NM_026896    | Med27    | -2026  | 29200104 | 29200304 |
| 2 | 29202330 | 29333954 + | NM_029615    | Med27    | 76390  | 29278720 | 29278920 |
| 2 | 29202330 | 29333954 + | NM_029615    | Med27    | 88740  | 29291070 | 29291270 |
| 2 | 29202330 | 29333954 + | NM_029615    | Med27    | -2026  | 29200104 | 29200304 |
| 2 | 29234034 | 29380311 + | NM_001290489 | Med27    | 44686  | 29278720 | 29278920 |
| 2 | 29234034 | 29380311 + | NM_001290489 | Med27    | 104764 | 29338798 | 29338998 |
| 2 | 29234034 | 29380311 + | NM_001290489 | Med27    | 105315 | 29339349 | 29339549 |
| 2 | 29234034 | 29380311 + | NM_001290489 | Med27    | 57036  | 29291070 | 29291270 |
| 2 | 29330735 | 29330815 - | NR_105753    | Mir133c  | -7983  | 29338798 | 29338998 |
| 2 | 29330735 | 29330815 - | NR_105753    | Mir133c  | -8534  | 29339349 | 29339549 |
| 2 | 29475240 | 29595884 + | NM_001039086 | Rapgef1  | 20765  | 29496005 | 29496205 |

|   |          |            |              |               |       |          |          |
|---|----------|------------|--------------|---------------|-------|----------|----------|
| 2 | 29475240 | 29595884 + | NM_001039087 | Rapgef1       | 20765 | 29496005 | 29496205 |
| 2 | 29475240 | 29595884 + | NM_054050    | Rapgef1       | 20765 | 29496005 | 29496205 |
| 2 | 29630204 | 29643192 - | NM_001290495 | Trub2         | 5033  | 29637959 | 29638159 |
| 2 | 29630204 | 29643192 - | NM_001290496 | Trub2         | 5033  | 29637959 | 29638159 |
| 2 | 29630204 | 29643192 - | NM_145520    | Trub2         | 5033  | 29637959 | 29638159 |
| 2 | 29630204 | 29643192 - | NR_110962    | Trub2         | 5033  | 29637959 | 29638159 |
| 2 | 29643783 | 29653264 + | NM_178693    | Coq4          | -5624 | 29637959 | 29638159 |
| 2 | 29682909 | 29700517 + | NM_026615    | Urm1          | -832  | 29681877 | 29682077 |
| 2 | 29682909 | 29700517 + | NM_026615    | Urm1          | -9048 | 29673661 | 29673861 |
| 2 | 29952803 | 29980132 - | NM_001290503 | Zer1          | 17920 | 29962012 | 29962212 |
| 2 | 29952803 | 29980132 - | NM_178694    | Zer1          | 17920 | 29962012 | 29962212 |
| 2 | 30040651 | 30061220 - | NM_172404    | Ccbl1         | 5251  | 30055769 | 30055969 |
| 2 | 30093289 | 30119311 + | NM_177725    | Lrrc8a        | 13800 | 30107089 | 30107289 |
| 2 | 30200297 | 30214837 - | NM_001289709 | Sh3glb2       | -1586 | 30216423 | 30216623 |
| 2 | 30200297 | 30214837 - | NM_001289709 | Sh3glb2       | -6108 | 30220945 | 30221145 |
| 2 | 30200297 | 30214837 - | NM_001289710 | Sh3glb2       | -1586 | 30216423 | 30216623 |
| 2 | 30200297 | 30214837 - | NM_001289710 | Sh3glb2       | -6108 | 30220945 | 30221145 |
| 2 | 30200297 | 30214837 - | NM_139302    | Sh3glb2       | -1586 | 30216423 | 30216623 |
| 2 | 30200297 | 30214837 - | NM_139302    | Sh3glb2       | -6108 | 30220945 | 30221145 |
| 2 | 30219753 | 30241040 + | NM_001242407 | Fam73b        | -3130 | 30216423 | 30216623 |
| 2 | 30219753 | 30241040 + | NM_001242407 | Fam73b        | 1192  | 30220945 | 30221145 |
| 2 | 30219855 | 30241040 + | NM_175392    | Fam73b        | -3232 | 30216423 | 30216623 |
| 2 | 30219855 | 30241040 + | NM_175392    | Fam73b        | 1090  | 30220945 | 30221145 |
| 2 | 30255996 | 30271269 - | NM_007760    | Crat          | 7178  | 30263891 | 30264091 |
| 2 | 30255996 | 30271269 - | NM_007760    | Crat          | -8122 | 30279391 | 30279591 |
| 2 | 30271570 | 30303328 + | NM_138748    | Ppp2r4        | -7479 | 30263891 | 30264091 |
| 2 | 30271570 | 30303328 + | NM_138748    | Ppp2r4        | 13112 | 30284682 | 30284882 |
| 2 | 30271570 | 30303328 + | NM_138748    | Ppp2r4        | 7821  | 30279391 | 30279591 |
| 2 | 30651083 | 30657258 - | NM_198000    | 1700001O22Rik | -6477 | 30663735 | 30663935 |
| 2 | 30651083 | 30659185 - | NR_028486    | 1700001O22Rik | -4550 | 30663735 | 30663935 |

|   |          |            |              |               |       |          |          |
|---|----------|------------|--------------|---------------|-------|----------|----------|
| 2 | 30651083 | 30659185 - | NR_028487    | 1700001O22Rik | -4550 | 30663735 | 30663935 |
| 2 | 30663497 | 30678535 + | NM_170592    | Ntmt1         | 238   | 30663735 | 30663935 |
| 2 | 30744991 | 30758818 - | NM_022415    | Ptges         | 5590  | 30753028 | 30753228 |
| 2 | 30808521 | 30814536 + | NM_133673    | Tor1b         | 5938  | 30814459 | 30814659 |
| 2 | 30816081 | 30823439 - | NM_144884    | Tor1a         | 4839  | 30818400 | 30818600 |
| 2 | 30881726 | 30997529 - | NM_001038700 | Fnbp1         | 608   | 30996721 | 30996921 |
| 2 | 30881726 | 30997529 - | NM_001038700 | Fnbp1         | 26686 | 30970643 | 30970843 |
| 2 | 30881726 | 30997529 - | NM_001177648 | Fnbp1         | 608   | 30996721 | 30996921 |
| 2 | 30881726 | 30997529 - | NM_001177648 | Fnbp1         | 26686 | 30970643 | 30970843 |
| 2 | 30881726 | 30997529 - | NM_001177649 | Fnbp1         | 608   | 30996721 | 30996921 |
| 2 | 30881726 | 30997529 - | NM_001177649 | Fnbp1         | 26686 | 30970643 | 30970843 |
| 2 | 30908755 | 30997529 - | NM_019406    | Fnbp1         | 608   | 30996721 | 30996921 |
| 2 | 30908755 | 30997529 - | NM_019406    | Fnbp1         | 26686 | 30970643 | 30970843 |
| 2 | 31006569 | 31007812 - | NR_040334    | D330023K18Rik | -4682 | 31012494 | 31012694 |
| 2 | 31007836 | 31072088 + | NM_178760    | Gpr107        | 30618 | 31038454 | 31038654 |
| 2 | 31007836 | 31072088 + | NM_178760    | Gpr107        | 49699 | 31057535 | 31057735 |
| 2 | 31007836 | 31072088 + | NM_178760    | Gpr107        | 4658  | 31012494 | 31012694 |
| 2 | 31544057 | 31659883 + | NM_001112703 | Abl1          | 47729 | 31591786 | 31591986 |
| 2 | 31544057 | 31659883 + | NM_001112703 | Abl1          | 58364 | 31602421 | 31602621 |
| 2 | 31544057 | 31659883 + | NM_001112703 | Abl1          | 55949 | 31600006 | 31600206 |
| 2 | 31544057 | 31659883 + | NM_001112703 | Abl1          | 12116 | 31556173 | 31556373 |
| 2 | 31544057 | 31659883 + | NM_001112703 | Abl1          | 36593 | 31580650 | 31580850 |
| 2 | 31544057 | 31659883 + | NM_001283046 | Abl1          | 47729 | 31591786 | 31591986 |
| 2 | 31544057 | 31659883 + | NM_001283046 | Abl1          | 58364 | 31602421 | 31602621 |
| 2 | 31544057 | 31659883 + | NM_001283046 | Abl1          | 55949 | 31600006 | 31600206 |
| 2 | 31544057 | 31659883 + | NM_001283046 | Abl1          | 12116 | 31556173 | 31556373 |
| 2 | 31544057 | 31659883 + | NM_001283046 | Abl1          | 36593 | 31580650 | 31580850 |
| 2 | 31544057 | 31659883 + | NM_001283047 | Abl1          | 47729 | 31591786 | 31591986 |
| 2 | 31544057 | 31659883 + | NM_001283047 | Abl1          | 58364 | 31602421 | 31602621 |
| 2 | 31544057 | 31659883 + | NM_001283047 | Abl1          | 55949 | 31600006 | 31600206 |

|   |          |            |              |         |       |          |          |
|---|----------|------------|--------------|---------|-------|----------|----------|
| 2 | 31544057 | 31659883 + | NM_001283047 | Abl1    | 12116 | 31556173 | 31556373 |
| 2 | 31544057 | 31659883 + | NM_001283047 | Abl1    | 36593 | 31580650 | 31580850 |
| 2 | 31742801 | 31802056 + | NM_011836    | Lamc3   | -8624 | 31733977 | 31734177 |
| 2 | 31805823 | 31828963 + | NM_145144    | Aif1l   | 720   | 31806543 | 31806743 |
| 2 | 31922405 | 31939226 - | NM_175511    | Fam78a  | -9521 | 31948747 | 31948947 |
| 2 | 31951171 | 31966341 + | NM_145521    | Ppapdc3 | -2224 | 31948747 | 31948947 |
| 2 | 32006668 | 32090058 + | NM_001159634 | Prrc2b  | 10044 | 32016712 | 32016912 |
| 2 | 32006668 | 32090058 + | NM_172661    | Prrc2b  | 10044 | 32016712 | 32016912 |
| 2 | 32163991 | 32208850 - | NM_001301737 | Dnm1    | -8361 | 32217211 | 32217411 |
| 2 | 32163991 | 32208850 - | NM_001301737 | Dnm1    | -1268 | 32210118 | 32210318 |
| 2 | 32163991 | 32208850 - | NM_001301737 | Dnm1    | -2572 | 32211422 | 32211622 |
| 2 | 32163991 | 32208850 - | NM_001301737 | Dnm1    | -616  | 32209466 | 32209666 |
| 2 | 32163991 | 32208850 - | NM_010065    | Dnm1    | -8361 | 32217211 | 32217411 |
| 2 | 32163991 | 32208850 - | NM_010065    | Dnm1    | -1268 | 32210118 | 32210318 |
| 2 | 32163991 | 32208850 - | NM_010065    | Dnm1    | -2572 | 32211422 | 32211622 |
| 2 | 32163991 | 32208850 - | NM_010065    | Dnm1    | -616  | 32209466 | 32209666 |
| 2 | 32163991 | 32208850 - | NR_125959    | Dnm1    | -8361 | 32217211 | 32217411 |
| 2 | 32163991 | 32208850 - | NR_125959    | Dnm1    | -1268 | 32210118 | 32210318 |
| 2 | 32163991 | 32208850 - | NR_125959    | Dnm1    | -2572 | 32211422 | 32211622 |
| 2 | 32163991 | 32208850 - | NR_125959    | Dnm1    | -616  | 32209466 | 32209666 |
| 2 | 32218530 | 32233834 + | NM_001252536 | Ciz1    | -1119 | 32217211 | 32217411 |
| 2 | 32218530 | 32233834 + | NM_001252536 | Ciz1    | 418   | 32218948 | 32219148 |
| 2 | 32218530 | 32233834 + | NM_001252536 | Ciz1    | -8212 | 32210118 | 32210318 |
| 2 | 32218530 | 32233834 + | NM_001252536 | Ciz1    | -6908 | 32211422 | 32211622 |
| 2 | 32218530 | 32233834 + | NM_001252536 | Ciz1    | -8864 | 32209466 | 32209666 |
| 2 | 32218530 | 32233834 + | NM_001252538 | Ciz1    | -1119 | 32217211 | 32217411 |
| 2 | 32218530 | 32233834 + | NM_001252538 | Ciz1    | 418   | 32218948 | 32219148 |
| 2 | 32218530 | 32233834 + | NM_001252538 | Ciz1    | -8212 | 32210118 | 32210318 |
| 2 | 32218530 | 32233834 + | NM_001252538 | Ciz1    | -6908 | 32211422 | 32211622 |
| 2 | 32218530 | 32233834 + | NM_001252538 | Ciz1    | -8864 | 32209466 | 32209666 |

|   |          |            |              |               |       |          |          |
|---|----------|------------|--------------|---------------|-------|----------|----------|
| 2 | 32218718 | 32233834 + | NM_001252534 | Ciz1          | -1307 | 32217211 | 32217411 |
| 2 | 32218718 | 32233834 + | NM_001252534 | Ciz1          | 230   | 32218948 | 32219148 |
| 2 | 32218718 | 32233834 + | NM_001252534 | Ciz1          | -8400 | 32210118 | 32210318 |
| 2 | 32218718 | 32233834 + | NM_001252534 | Ciz1          | -7096 | 32211422 | 32211622 |
| 2 | 32218718 | 32233834 + | NM_001252534 | Ciz1          | -9052 | 32209466 | 32209666 |
| 2 | 32218718 | 32233834 + | NM_001252537 | Ciz1          | -1307 | 32217211 | 32217411 |
| 2 | 32218718 | 32233834 + | NM_001252537 | Ciz1          | 230   | 32218948 | 32219148 |
| 2 | 32218718 | 32233834 + | NM_001252537 | Ciz1          | -8400 | 32210118 | 32210318 |
| 2 | 32218718 | 32233834 + | NM_001252537 | Ciz1          | -7096 | 32211422 | 32211622 |
| 2 | 32218718 | 32233834 + | NM_001252537 | Ciz1          | -9052 | 32209466 | 32209666 |
| 2 | 32218718 | 32233834 + | NM_028412    | Ciz1          | -1307 | 32217211 | 32217411 |
| 2 | 32218718 | 32233834 + | NM_028412    | Ciz1          | 230   | 32218948 | 32219148 |
| 2 | 32218718 | 32233834 + | NM_028412    | Ciz1          | -8400 | 32210118 | 32210318 |
| 2 | 32218718 | 32233834 + | NM_028412    | Ciz1          | -7096 | 32211422 | 32211622 |
| 2 | 32218718 | 32233834 + | NM_028412    | Ciz1          | -9052 | 32209466 | 32209666 |
| 2 | 32234621 | 32237436 - | NM_198001    | 1110008P14Rik | -332  | 32237768 | 32237968 |
| 2 | 32251410 | 32258261 + | NM_133783    | Ptges2        | 4151  | 32255561 | 32255761 |
| 2 | 32270007 | 32306991 - | NM_001164357 | Slc25a25      | 1700  | 32305091 | 32305291 |
| 2 | 32270007 | 32306991 - | NM_001164357 | Slc25a25      | 587   | 32306204 | 32306404 |
| 2 | 32270007 | 32306991 - | NM_001164357 | Slc25a25      | 27794 | 32278997 | 32279197 |
| 2 | 32270007 | 32306991 - | NM_001164357 | Slc25a25      | 8269  | 32298522 | 32298722 |
| 2 | 32270007 | 32306991 - | NM_001164357 | Slc25a25      | 32631 | 32274160 | 32274360 |
| 2 | 32270007 | 32286672 - | NM_001164358 | Slc25a25      | 7475  | 32278997 | 32279197 |
| 2 | 32270007 | 32286672 - | NM_001164358 | Slc25a25      | 12312 | 32274160 | 32274360 |
| 2 | 32270007 | 32279587 - | NM_001290558 | Slc25a25      | 390   | 32278997 | 32279197 |
| 2 | 32270007 | 32279587 - | NM_001290558 | Slc25a25      | 5227  | 32274160 | 32274360 |
| 2 | 32270007 | 32306991 - | NM_146118    | Slc25a25      | 1700  | 32305091 | 32305291 |
| 2 | 32270007 | 32306991 - | NM_146118    | Slc25a25      | 587   | 32306204 | 32306404 |
| 2 | 32270007 | 32306991 - | NM_146118    | Slc25a25      | 27794 | 32278997 | 32279197 |
| 2 | 32270007 | 32306991 - | NM_146118    | Slc25a25      | 8269  | 32298522 | 32298722 |

|   |          |            |              |               |        |          |          |
|---|----------|------------|--------------|---------------|--------|----------|----------|
| 2 | 32270007 | 32306991 - | NM_146118    | Slc25a25      | 32631  | 32274160 | 32274360 |
| 2 | 32305977 | 32310997 + | NM_194335    | Naif1         | -686   | 32305091 | 32305291 |
| 2 | 32305977 | 32310997 + | NM_194335    | Naif1         | 227    | 32306204 | 32306404 |
| 2 | 32305977 | 32310997 + | NM_194335    | Naif1         | -7255  | 32298522 | 32298722 |
| 2 | 32390879 | 32425271 + | NM_153560    | Fam102a       | 3309   | 32394188 | 32394388 |
| 2 | 32426378 | 32429092 + | NM_010073    | Dpm2          | 413    | 32426791 | 32426991 |
| 2 | 32431339 | 32439300 + | NM_198191    | Pip5kl1       | -4348  | 32426791 | 32426991 |
| 2 | 32442598 | 32455217 + | NM_001276425 | St6galnac4    | 1528   | 32444126 | 32444326 |
| 2 | 32442598 | 32455217 + | NM_011373    | St6galnac4    | 1528   | 32444126 | 32444326 |
| 2 | 32538129 | 32549696 - | NM_010236    | Fpgs          | -11    | 32549707 | 32549907 |
| 2 | 32543150 | 32543287 - | NR_106168    | Mir8093       | -6420  | 32549707 | 32549907 |
| 2 | 32612546 | 32631154 - | NM_001290563 | Ttc16         | 3007   | 32627947 | 32628147 |
| 2 | 32612546 | 32631154 - | NM_001290563 | Ttc16         | 6052   | 32624902 | 32625102 |
| 2 | 32617697 | 32630860 - | NM_001290564 | Ttc16         | 2713   | 32627947 | 32628147 |
| 2 | 32617697 | 32630860 - | NM_001290564 | Ttc16         | 5758   | 32624902 | 32625102 |
| 2 | 32617697 | 32630860 - | NM_001290566 | Ttc16         | 2713   | 32627947 | 32628147 |
| 2 | 32617697 | 32630860 - | NM_001290566 | Ttc16         | 5758   | 32624902 | 32625102 |
| 2 | 32617697 | 32630860 - | NM_001290567 | Ttc16         | 2713   | 32627947 | 32628147 |
| 2 | 32617697 | 32630860 - | NM_001290567 | Ttc16         | 5758   | 32624902 | 32625102 |
| 2 | 32617697 | 32631154 - | NM_177384    | Ttc16         | 3007   | 32627947 | 32628147 |
| 2 | 32617697 | 32631154 - | NM_177384    | Ttc16         | 6052   | 32624902 | 32625102 |
| 2 | 32631341 | 32633114 + | NM_178595    | Ptrh1         | -3194  | 32627947 | 32628147 |
| 2 | 32631341 | 32633114 + | NM_178595    | Ptrh1         | -6239  | 32624902 | 32625102 |
| 2 | 32841886 | 32942725 - | NM_178888    | Garnl3        | 78374  | 32864151 | 32864351 |
| 2 | 32988939 | 33227015 - | NM_001290570 | Ralgps1       | 9910   | 33216905 | 33217105 |
| 2 | 32988939 | 33227015 - | NM_001290572 | Ralgps1       | 9910   | 33216905 | 33217105 |
| 2 | 32988939 | 33227015 - | NM_175211    | Ralgps1       | 9910   | 33216905 | 33217105 |
| 2 | 33873809 | 33963256 - | NR_130173    | C230014O12Rik | 76891  | 33886165 | 33886365 |
| 2 | 34262291 | 34480479 + | NM_001290625 | Mapkap1       | 160513 | 34422804 | 34423004 |
| 2 | 34262291 | 34480479 + | NM_001290625 | Mapkap1       | 13064  | 34275355 | 34275555 |



|   |          |            |              |         |        |          |          |
|---|----------|------------|--------------|---------|--------|----------|----------|
| 2 | 34262371 | 34480479 + | NM_001290626 | Mapkap1 | 160433 | 34422804 | 34423004 |
| 2 | 34262371 | 34480479 + | NM_001290626 | Mapkap1 | 12984  | 34275355 | 34275555 |
| 2 | 34262371 | 34480479 + | NM_177345    | Mapkap1 | 160433 | 34422804 | 34423004 |
| 2 | 34262371 | 34480479 + | NM_177345    | Mapkap1 | 12984  | 34275355 | 34275555 |
| 2 | 34749275 | 34769497 - | NM_028716    | Phf19   | -723   | 34770220 | 34770420 |
| 2 | 35111879 | 35163423 + | NM_001206367 | Gsn     | 11463  | 35123342 | 35123542 |
| 2 | 35111879 | 35163423 + | NM_001206368 | Gsn     | 11463  | 35123342 | 35123542 |
| 2 | 35122264 | 35163423 + | NM_001206369 | Gsn     | 1078   | 35123342 | 35123542 |
| 2 | 35169510 | 35192530 - | NM_013515    | Stom    | 13923  | 35178407 | 35178607 |
| 2 | 35255699 | 35316970 - | NM_001145821 | Ggta1   | -6582  | 35323552 | 35323752 |
| 2 | 35255699 | 35316970 - | NM_001308299 | Ggta1   | -6582  | 35323552 | 35323752 |
| 2 | 35255699 | 35316970 - | NM_001308300 | Ggta1   | -6582  | 35323552 | 35323752 |
| 2 | 35255699 | 35316970 - | NM_010283    | Ggta1   | -6582  | 35323552 | 35323752 |
| 2 | 35413978 | 35586515 + | NM_001114125 | Dab2ip  | 101325 | 35515303 | 35515503 |
| 2 | 35413978 | 35586515 + | NM_001114125 | Dab2ip  | 88334  | 35502312 | 35502512 |
| 2 | 35438360 | 35586515 + | NM_001290637 | Dab2ip  | 76943  | 35515303 | 35515503 |
| 2 | 35438360 | 35586515 + | NM_001290637 | Dab2ip  | 63952  | 35502312 | 35502512 |
| 2 | 35477501 | 35586515 + | NM_001114124 | Dab2ip  | 37802  | 35515303 | 35515503 |
| 2 | 35477501 | 35586515 + | NM_001114124 | Dab2ip  | 24811  | 35502312 | 35502512 |
| 2 | 35477501 | 35586515 + | NM_001290641 | Dab2ip  | 37802  | 35515303 | 35515503 |
| 2 | 35477501 | 35586515 + | NM_001290641 | Dab2ip  | 24811  | 35502312 | 35502512 |
| 2 | 35606746 | 35835145 - | NM_029774    | Ttll11  | 192362 | 35642583 | 35642783 |
| 2 | 35606746 | 35835145 - | NM_029774    | Ttll11  | 120575 | 35714370 | 35714570 |
| 2 | 37298805 | 37421958 + | NM_146121    | Rabgap1 | 43762  | 37342567 | 37342767 |
| 2 | 37298805 | 37421958 + | NM_146121    | Rabgap1 | 86194  | 37384999 | 37385199 |
| 2 | 37298805 | 37421958 + | NM_146121    | Rabgap1 | 59669  | 37358474 | 37358674 |
| 2 | 37307774 | 37400483 + | NM_001033960 | Rabgap1 | 34793  | 37342567 | 37342767 |
| 2 | 37307774 | 37400483 + | NM_001033960 | Rabgap1 | 77225  | 37384999 | 37385199 |
| 2 | 37307774 | 37400483 + | NM_001033960 | Rabgap1 | 50700  | 37358474 | 37358674 |
| 2 | 37543721 | 37543805 - | NR_039590    | Mir5128 | -745   | 37544550 | 37544750 |

|   |          |            |              |         |        |          |          |
|---|----------|------------|--------------|---------|--------|----------|----------|
| 2 | 37631769 | 37654624 + | NM_001163566 | Crb2    | -4116  | 37627453 | 37627653 |
| 2 | 37654510 | 38142905 - | NM_146122    | Dennd1a | 188462 | 37954243 | 37954443 |
| 2 | 37654510 | 38142905 - | NM_146122    | Dennd1a | 202056 | 37940649 | 37940849 |
| 2 | 38367217 | 38443011 + | NM_021606    | Nek6    | 12962  | 38380179 | 38380379 |
| 2 | 38367217 | 38443011 + | NM_021606    | Nek6    | 19425  | 38386642 | 38386842 |
| 2 | 38367217 | 38443011 + | NM_021606    | Nek6    | 21615  | 38388832 | 38389032 |
| 2 | 38367217 | 38443011 + | NM_021606    | Nek6    | 13721  | 38380938 | 38381138 |
| 2 | 38367217 | 38443011 + | NM_021606    | Nek6    | 2480   | 38369697 | 38369897 |
| 2 | 38367217 | 38443011 + | NM_021606    | Nek6    | 4874   | 38372091 | 38372291 |
| 2 | 38367396 | 38443011 + | NM_001159631 | Nek6    | 12783  | 38380179 | 38380379 |
| 2 | 38367396 | 38443011 + | NM_001159631 | Nek6    | 19246  | 38386642 | 38386842 |
| 2 | 38367396 | 38443011 + | NM_001159631 | Nek6    | 21436  | 38388832 | 38389032 |
| 2 | 38367396 | 38443011 + | NM_001159631 | Nek6    | 13542  | 38380938 | 38381138 |
| 2 | 38367396 | 38443011 + | NM_001159631 | Nek6    | 2301   | 38369697 | 38369897 |
| 2 | 38367396 | 38443011 + | NM_001159631 | Nek6    | 4695   | 38372091 | 38372291 |
| 2 | 38578894 | 38640036 - | NM_001159548 | Nr6a1   | 0      | 38640036 | 38640236 |
| 2 | 38578894 | 38640036 - | NM_001159549 | Nr6a1   | 0      | 38640036 | 38640236 |
| 2 | 38578894 | 38781982 - | NM_010264    | Nr6a1   | 141746 | 38640036 | 38640236 |
| 2 | 38787500 | 38816106 + | NM_172854    | Olfml2a | 18573  | 38806073 | 38806273 |
| 2 | 38857101 | 38860652 - | NM_025592    | Rpl35   | -408   | 38861060 | 38861260 |
| 2 | 38863659 | 38871393 + | NM_028809    | Arpc5l  | -2399  | 38861060 | 38861260 |
| 2 | 38921735 | 39046251 - | NM_178778    | Scai    | 62954  | 38983097 | 38983297 |
| 2 | 40452293 | 42509119 - | NM_053011    | Lrp1b   | 105640 | 42403279 | 42403479 |
| 2 | 44419932 | 44717143 - | NM_172662    | Gtdc1   | 2966   | 44713977 | 44714177 |
| 2 | 49643206 | 49804367 + | NM_027990    | Lypd6b  | 44779  | 49687985 | 49688185 |
| 2 | 49643206 | 49804367 + | NM_027990    | Lypd6b  | 26456  | 49669662 | 49669862 |
| 2 | 49921949 | 50049090 + | NM_177139    | Lypd6   | 84309  | 50006258 | 50006458 |
| 2 | 49921949 | 50049090 + | NM_177139    | Lypd6   | 120403 | 50042352 | 50042552 |
| 2 | 49921949 | 50049090 + | NM_177139    | Lypd6   | 86763  | 50008712 | 50008912 |
| 2 | 49921949 | 50049090 + | NM_177139    | Lypd6   | 83813  | 50005762 | 50005962 |

|   |          |            |              |         |        |          |          |
|---|----------|------------|--------------|---------|--------|----------|----------|
| 2 | 49921949 | 50049090 + | NR_033304    | Lypd6   | 84309  | 50006258 | 50006458 |
| 2 | 49921949 | 50049090 + | NR_033304    | Lypd6   | 120403 | 50042352 | 50042552 |
| 2 | 49921949 | 50049090 + | NR_033304    | Lypd6   | 86763  | 50008712 | 50008912 |
| 2 | 49921949 | 50049090 + | NR_033304    | Lypd6   | 83813  | 50005762 | 50005962 |
| 2 | 50985959 | 51004632 - | NM_028810    | Rnd3    | 11157  | 50993275 | 50993475 |
| 2 | 50985959 | 51004632 - | NM_028810    | Rnd3    | 233    | 51004199 | 51004399 |
| 2 | 52283840 | 52532129 - | NM_001037099 | Cacnb4  | 237639 | 52294290 | 52294490 |
| 2 | 52283840 | 52532129 - | NM_001037099 | Cacnb4  | 193308 | 52338621 | 52338821 |
| 2 | 52283840 | 52531663 - | NM_001285426 | Cacnb4  | 237173 | 52294290 | 52294490 |
| 2 | 52283840 | 52531663 - | NM_001285426 | Cacnb4  | 192842 | 52338621 | 52338821 |
| 2 | 52283840 | 52414132 - | NM_001285427 | Cacnb4  | 119642 | 52294290 | 52294490 |
| 2 | 52283840 | 52414132 - | NM_001285427 | Cacnb4  | 75311  | 52338621 | 52338821 |
| 2 | 52283840 | 52531379 - | NM_001285428 | Cacnb4  | 236889 | 52294290 | 52294490 |
| 2 | 52283840 | 52531379 - | NM_001285428 | Cacnb4  | 192558 | 52338621 | 52338821 |
| 2 | 52283840 | 52414132 - | NM_146123    | Cacnb4  | 119642 | 52294290 | 52294490 |
| 2 | 52283840 | 52414132 - | NM_146123    | Cacnb4  | 75311  | 52338621 | 52338821 |
| 2 | 52547725 | 52601184 - | NM_019667    | Stam2   | 4046   | 52596938 | 52597138 |
| 2 | 57090089 | 57223131 + | NM_001145820 | Gpd2    | 14284  | 57104373 | 57104573 |
| 2 | 57090089 | 57223131 + | NM_001145820 | Gpd2    | 52735  | 57142824 | 57143024 |
| 2 | 57090089 | 57223131 + | NM_001145820 | Gpd2    | 24608  | 57114697 | 57114897 |
| 2 | 57090793 | 57223131 + | NM_010274    | Gpd2    | 13580  | 57104373 | 57104573 |
| 2 | 57090793 | 57223131 + | NM_010274    | Gpd2    | 52031  | 57142824 | 57143024 |
| 2 | 57090793 | 57223131 + | NM_010274    | Gpd2    | 23904  | 57114697 | 57114897 |
| 2 | 58119864 | 58177219 - | NM_001033369 | Acvr1c  | 45371  | 58131648 | 58131848 |
| 2 | 58119864 | 58210170 - | NM_001111030 | Acvr1c  | 78322  | 58131648 | 58131848 |
| 2 | 58129190 | 58139314 + | NR_040365    | Gm13544 | 2458   | 58131648 | 58131848 |
| 2 | 58298849 | 58419240 - | NM_001110204 | Acvr1   | 17531  | 58401509 | 58401709 |
| 2 | 58298849 | 58419240 - | NM_001110204 | Acvr1   | 9536   | 58409504 | 58409704 |
| 2 | 58298849 | 58419240 - | NM_001110204 | Acvr1   | 74897  | 58344143 | 58344343 |
| 2 | 58298849 | 58419240 - | NM_001110205 | Acvr1   | 17531  | 58401509 | 58401709 |

|   |          |            |              |         |        |          |          |
|---|----------|------------|--------------|---------|--------|----------|----------|
| 2 | 58298849 | 58419240 - | NM_001110205 | Acvr1   | 9536   | 58409504 | 58409704 |
| 2 | 58298849 | 58419240 - | NM_001110205 | Acvr1   | 74897  | 58344143 | 58344343 |
| 2 | 58298849 | 58419240 - | NM_007394    | Acvr1   | 17531  | 58401509 | 58401709 |
| 2 | 58298849 | 58419240 - | NM_007394    | Acvr1   | 9536   | 58409504 | 58409704 |
| 2 | 58298849 | 58419240 - | NM_007394    | Acvr1   | 74897  | 58344143 | 58344343 |
| 2 | 58674109 | 58998685 - | NM_001001178 | Ccdc148 | -6560  | 59005245 | 59005445 |
| 2 | 58998907 | 59193263 + | NM_026361    | Pkp4    | 122758 | 59121665 | 59121865 |
| 2 | 58998907 | 59193263 + | NM_026361    | Pkp4    | 6338   | 59005245 | 59005445 |
| 2 | 58998907 | 59193263 + | NM_026361    | Pkp4    | 52199  | 59051106 | 59051306 |
| 2 | 58998907 | 59193263 + | NM_026361    | Pkp4    | 75357  | 59074264 | 59074464 |
| 2 | 58998907 | 59193263 + | NM_026361    | Pkp4    | 51392  | 59050299 | 59050499 |
| 2 | 58998907 | 59193263 + | NM_175464    | Pkp4    | 122758 | 59121665 | 59121865 |
| 2 | 58998907 | 59193263 + | NM_175464    | Pkp4    | 6338   | 59005245 | 59005445 |
| 2 | 58998907 | 59193263 + | NM_175464    | Pkp4    | 52199  | 59051106 | 59051306 |
| 2 | 58998907 | 59193263 + | NM_175464    | Pkp4    | 75357  | 59074264 | 59074464 |
| 2 | 58998907 | 59193263 + | NM_175464    | Pkp4    | 51392  | 59050299 | 59050499 |
| 2 | 59450099 | 59684271 + | NM_198294    | Tanc1   | 58375  | 59508474 | 59508674 |
| 2 | 59450099 | 59684271 + | NM_198294    | Tanc1   | 73394  | 59523493 | 59523693 |
| 2 | 59450099 | 59684271 + | NM_198294    | Tanc1   | 58689  | 59508788 | 59508988 |
| 2 | 59484826 | 59684271 + | NM_001290659 | Tanc1   | 23648  | 59508474 | 59508674 |
| 2 | 59484826 | 59684271 + | NM_001290659 | Tanc1   | 38667  | 59523493 | 59523693 |
| 2 | 59484826 | 59684271 + | NM_001290659 | Tanc1   | 23962  | 59508788 | 59508988 |
| 2 | 59690422 | 59720664 - | NM_028118    | Wdsub1  | 25443  | 59695021 | 59695221 |
| 2 | 59690422 | 59720664 - | NM_028118    | Wdsub1  | 24485  | 59695979 | 59696179 |
| 2 | 59693251 | 59720664 - | NM_001159636 | Wdsub1  | 25443  | 59695021 | 59695221 |
| 2 | 59693251 | 59720664 - | NM_001159636 | Wdsub1  | 24485  | 59695979 | 59696179 |
| 2 | 59737420 | 59963798 - | NM_001001182 | Baz2b   | 3418   | 59960180 | 59960380 |
| 2 | 60047993 | 60086443 + | NM_020575    | March7  | 13680  | 60061673 | 60061873 |
| 2 | 60090050 | 60122542 - | NM_001290660 | Cd302   | -115   | 60122657 | 60122857 |
| 2 | 60090050 | 60122542 - | NM_001290660 | Cd302   | -676   | 60123218 | 60123418 |

|   |          |            |              |        |        |          |          |
|---|----------|------------|--------------|--------|--------|----------|----------|
| 2 | 60090050 | 60122542 - | NM_001290660 | Cd302  | 31330  | 60091012 | 60091212 |
| 2 | 60090050 | 60122542 - | NM_025422    | Cd302  | -115   | 60122657 | 60122857 |
| 2 | 60090050 | 60122542 - | NM_025422    | Cd302  | -676   | 60123218 | 60123418 |
| 2 | 60090050 | 60122542 - | NM_025422    | Cd302  | 31330  | 60091012 | 60091212 |
| 2 | 60255600 | 60391366 - | NM_008867    | Pla2r1 | 134967 | 60256199 | 60256399 |
| 2 | 60436349 | 60560661 - | NM_001159564 | Itgb6  | 67425  | 60493036 | 60493236 |
| 2 | 60436349 | 60560661 - | NM_001159564 | Itgb6  | 33300  | 60527161 | 60527361 |
| 2 | 60436349 | 60560661 - | NM_001159564 | Itgb6  | 68451  | 60492010 | 60492210 |
| 2 | 60436349 | 60511751 - | NM_021359    | Itgb6  | 18515  | 60493036 | 60493236 |
| 2 | 60436349 | 60511751 - | NM_021359    | Itgb6  | 19541  | 60492010 | 60492210 |
| 2 | 60590010 | 60801262 - | NM_020296    | Rbms1  | 54705  | 60746357 | 60746557 |
| 2 | 61416643 | 61492227 + | NM_011529    | Tank   | -6605  | 61409838 | 61410038 |
| 2 | 62168130 | 62250289 - | NM_010074    | Dpp4   | 47054  | 62203035 | 62203235 |
| 2 | 62168130 | 62250289 - | NM_010074    | Dpp4   | 15120  | 62234969 | 62235169 |
| 2 | 62168130 | 62250289 - | NM_010074    | Dpp4   | 6803   | 62243286 | 62243486 |
| 2 | 62168130 | 62250289 - | NM_010074    | Dpp4   | -8043  | 62258332 | 62258532 |
| 2 | 62168130 | 62250289 - | NM_010074    | Dpp4   | 12653  | 62237436 | 62237636 |
| 2 | 62168130 | 62250289 - | NM_010074    | Dpp4   | 40434  | 62209655 | 62209855 |
| 2 | 62168130 | 62250289 - | NM_010074    | Dpp4   | 25571  | 62224518 | 62224718 |
| 2 | 62168130 | 62250289 - | NM_010074    | Dpp4   | 43379  | 62206710 | 62206910 |
| 2 | 62168130 | 62250289 - | NM_010074    | Dpp4   | 48443  | 62201646 | 62201846 |
| 2 | 62171280 | 62250289 - | NM_001159543 | Dpp4   | 47054  | 62203035 | 62203235 |
| 2 | 62171280 | 62250289 - | NM_001159543 | Dpp4   | 15120  | 62234969 | 62235169 |
| 2 | 62171280 | 62250289 - | NM_001159543 | Dpp4   | 6803   | 62243286 | 62243486 |
| 2 | 62171280 | 62250289 - | NM_001159543 | Dpp4   | -8043  | 62258332 | 62258532 |
| 2 | 62171280 | 62250289 - | NM_001159543 | Dpp4   | 12653  | 62237436 | 62237636 |
| 2 | 62171280 | 62250289 - | NM_001159543 | Dpp4   | 40434  | 62209655 | 62209855 |
| 2 | 62171280 | 62250289 - | NM_001159543 | Dpp4   | 25571  | 62224518 | 62224718 |
| 2 | 62171280 | 62250289 - | NM_001159543 | Dpp4   | 43379  | 62206710 | 62206910 |
| 2 | 62171280 | 62250289 - | NM_001159543 | Dpp4   | 48443  | 62201646 | 62201846 |

|   |          |            |           |          |        |          |          |
|---|----------|------------|-----------|----------|--------|----------|----------|
| 2 | 64926396 | 65076684 - | NM_027225 | Cobll1   | 121871 | 64954613 | 64954813 |
| 2 | 64926396 | 65076684 - | NM_177025 | Cobll1   | 121871 | 64954613 | 64954813 |
| 2 | 65154690 | 65202084 - | NM_177074 | Slc38a11 | 34099  | 65167785 | 65167985 |
| 2 | 68048504 | 68310039 - | NM_016866 | Stk39    | 77595  | 68232244 | 68232444 |
| 2 | 68048504 | 68310039 - | NM_016866 | Stk39    | 35166  | 68274673 | 68274873 |
| 2 | 68048504 | 68310039 - | NM_016866 | Stk39    | 33790  | 68276049 | 68276249 |
| 2 | 68048504 | 68310039 - | NM_016866 | Stk39    | 45691  | 68264148 | 68264348 |
| 2 | 68048504 | 68310039 - | NM_016866 | Stk39    | 41282  | 68268557 | 68268757 |
| 2 | 68048504 | 68310039 - | NM_016866 | Stk39    | 50708  | 68259131 | 68259331 |
| 2 | 68048504 | 68310039 - | NM_016866 | Stk39    | 217041 | 68092798 | 68092998 |
| 2 | 68699614 | 68949348 + | NM_172856 | Cers6    | 154326 | 68853940 | 68854140 |
| 2 | 68699614 | 68949348 + | NM_172856 | Cers6    | 239952 | 68939566 | 68939766 |
| 2 | 68699614 | 68949348 + | NM_172856 | Cers6    | 2591   | 68702205 | 68702405 |
| 2 | 68699614 | 68949348 + | NM_172856 | Cers6    | 73233  | 68772847 | 68773047 |
| 2 | 68699614 | 68949348 + | NM_172856 | Cers6    | 102847 | 68802461 | 68802661 |
| 2 | 68699614 | 68949348 + | NM_172856 | Cers6    | 131145 | 68830759 | 68830959 |
| 2 | 68699614 | 68949348 + | NM_172856 | Cers6    | 85367  | 68784981 | 68785181 |
| 2 | 68699614 | 68949348 + | NM_172856 | Cers6    | 17573  | 68717187 | 68717387 |
| 2 | 68699614 | 68949348 + | NM_172856 | Cers6    | 38309  | 68737923 | 68738123 |
| 2 | 68699614 | 68949348 + | NM_172856 | Cers6    | 9605   | 68709219 | 68709419 |
| 2 | 68973857 | 69027387 + | NM_181547 | Nostrin  | 5063   | 68978920 | 68979120 |
| 2 | 68973857 | 69027387 + | NM_181547 | Nostrin  | 1061   | 68974918 | 68975118 |
| 2 | 68973857 | 69027387 + | NM_181547 | Nostrin  | 4403   | 68978260 | 68978460 |
| 2 | 69218519 | 69241144 + | NM_175512 | Dhrs9    | 5672   | 69224191 | 69224391 |
| 2 | 70312980 | 70315784 + | NM_022435 | Sp5      | 0      | 70312782 | 70312982 |
| 2 | 70327997 | 70401415 - | NR_040496 | Gad1os   | 65347  | 70335868 | 70336068 |
| 2 | 70499566 | 70529783 + | NM_027352 | Gorasp2  | -63    | 70499303 | 70499503 |
| 2 | 70499566 | 70529783 + | NM_027352 | Gorasp2  | -9378  | 70489988 | 70490188 |
| 2 | 70499566 | 70529783 + | NR_027343 | Gorasp2  | -63    | 70499303 | 70499503 |
| 2 | 70499566 | 70529783 + | NR_027343 | Gorasp2  | -9378  | 70489988 | 70490188 |

|   |          |            |              |               |       |          |          |
|---|----------|------------|--------------|---------------|-------|----------|----------|
| 2 | 70893801 | 70937200 + | NM_001165981 | Dcaf17        | 40438 | 70934239 | 70934439 |
| 2 | 71227317 | 71279680 + | NM_026115    | Hat1          | 2639  | 71229956 | 71230156 |
| 2 | 71624996 | 71696485 + | NM_001277970 | Itga6         | 22520 | 71647516 | 71647716 |
| 2 | 71624996 | 71696485 + | NM_001277970 | Itga6         | 8411  | 71633407 | 71633607 |
| 2 | 71624996 | 71696485 + | NM_001277970 | Itga6         | 16679 | 71641675 | 71641875 |
| 2 | 71624996 | 71696485 + | NM_001277970 | Itga6         | 18056 | 71643052 | 71643252 |
| 2 | 71624996 | 71696485 + | NM_001277970 | Itga6         | 13251 | 71638247 | 71638447 |
| 2 | 71624996 | 71696485 + | NM_008397    | Itga6         | 22520 | 71647516 | 71647716 |
| 2 | 71624996 | 71696485 + | NM_008397    | Itga6         | 8411  | 71633407 | 71633607 |
| 2 | 71624996 | 71696485 + | NM_008397    | Itga6         | 16679 | 71641675 | 71641875 |
| 2 | 71624996 | 71696485 + | NM_008397    | Itga6         | 18056 | 71643052 | 71643252 |
| 2 | 71624996 | 71696485 + | NM_008397    | Itga6         | 13251 | 71638247 | 71638447 |
| 2 | 72123694 | 72280668 + | NM_023057    | Zak           | 42625 | 72166319 | 72166519 |
| 2 | 72123694 | 72280668 + | NM_023057    | Zak           | 3348  | 72127042 | 72127242 |
| 2 | 72123758 | 72245559 + | NM_001164791 | Zak           | 42561 | 72166319 | 72166519 |
| 2 | 72123758 | 72245559 + | NM_001164791 | Zak           | 3284  | 72127042 | 72127242 |
| 2 | 72123758 | 72227897 + | NM_178084    | Zak           | 42561 | 72166319 | 72166519 |
| 2 | 72123758 | 72227897 + | NM_178084    | Zak           | 3284  | 72127042 | 72127242 |
| 2 | 72583903 | 72651775 - | NR_102348    | 6430710C18Rik | 32958 | 72618617 | 72618817 |
| 2 | 72583903 | 72651775 - | NR_102348    | 6430710C18Rik | 60796 | 72590779 | 72590979 |
| 2 | 73179563 | 73224538 - | NM_001190297 | Gpr155        | 560   | 73223778 | 73223978 |
| 2 | 73179563 | 73224538 - | NM_001276443 | Gpr155        | 560   | 73223778 | 73223978 |
| 2 | 73179563 | 73224538 - | NM_001276444 | Gpr155        | 560   | 73223778 | 73223978 |
| 2 | 74663869 | 74714806 + | NM_016804    | Mtx2          | 10174 | 74674043 | 74674243 |
| 2 | 75513576 | 75542699 - | NM_010902    | Nfe2l2        | 15393 | 75527106 | 75527306 |
| 2 | 75513576 | 75542699 - | NM_010902    | Nfe2l2        | -323  | 75543022 | 75543222 |
| 2 | 75513576 | 75542699 - | NM_010902    | Nfe2l2        | -2503 | 75545202 | 75545402 |
| 2 | 75513576 | 75542699 - | NM_010902    | Nfe2l2        | 7209  | 75535290 | 75535490 |
| 2 | 75670234 | 75769408 + | NM_172666    | Agps          | 9851  | 75680085 | 75680285 |
| 2 | 75670234 | 75769408 + | NM_172666    | Agps          | -1534 | 75668500 | 75668700 |

|   |          |            |              |         |        |          |          |
|---|----------|------------|--------------|---------|--------|----------|----------|
| 2 | 75829189 | 76176711 - | NM_001081033 | Pde11a  | 274040 | 75902471 | 75902671 |
| 2 | 75829189 | 76176711 - | NM_001081033 | Pde11a  | 288091 | 75888420 | 75888620 |
| 2 | 76244565 | 76438705 + | NM_001290733 | Osbp16  | 11239  | 76255804 | 76256004 |
| 2 | 76244565 | 76438705 + | NM_001290733 | Osbp16  | 92338  | 76336903 | 76337103 |
| 2 | 76244565 | 76438705 + | NM_001290733 | Osbp16  | 116004 | 76360569 | 76360769 |
| 2 | 76244565 | 76438705 + | NM_001290733 | Osbp16  | 29309  | 76273874 | 76274074 |
| 2 | 76244565 | 76438705 + | NM_001290734 | Osbp16  | 11239  | 76255804 | 76256004 |
| 2 | 76244565 | 76438705 + | NM_001290734 | Osbp16  | 92338  | 76336903 | 76337103 |
| 2 | 76244565 | 76438705 + | NM_001290734 | Osbp16  | 116004 | 76360569 | 76360769 |
| 2 | 76244565 | 76438705 + | NM_001290734 | Osbp16  | 29309  | 76273874 | 76274074 |
| 2 | 76244565 | 76438705 + | NM_145525    | Osbp16  | 11239  | 76255804 | 76256004 |
| 2 | 76244565 | 76438705 + | NM_145525    | Osbp16  | 92338  | 76336903 | 76337103 |
| 2 | 76244565 | 76438705 + | NM_145525    | Osbp16  | 116004 | 76360569 | 76360769 |
| 2 | 76244565 | 76438705 + | NM_145525    | Osbp16  | 29309  | 76273874 | 76274074 |
| 2 | 76337063 | 76379588 + | NM_001290735 | Osbp16  | 0      | 76336903 | 76337103 |
| 2 | 76337063 | 76379588 + | NM_001290735 | Osbp16  | 23506  | 76360569 | 76360769 |
| 2 | 76542041 | 76820605 - | NM_011652    | Ttn     | 53954  | 76766451 | 76766651 |
| 2 | 76542041 | 76820605 - | NM_011652    | Ttn     | 52533  | 76767872 | 76768072 |
| 2 | 76542041 | 76820605 - | NM_028004    | Ttn     | 53954  | 76766451 | 76766651 |
| 2 | 76542041 | 76820605 - | NM_028004    | Ttn     | 52533  | 76767872 | 76768072 |
| 2 | 76847963 | 77008693 - | NM_001025576 | Ccdc141 | -6960  | 77015653 | 77015853 |
| 2 | 77248689 | 77541330 - | NM_001113399 | Zfp385b | 180753 | 77360377 | 77360577 |
| 2 | 77248689 | 77541330 - | NM_001113399 | Zfp385b | 187310 | 77353820 | 77354020 |
| 2 | 77248689 | 77357724 - | NM_001113400 | Zfp385b | -2653  | 77360377 | 77360577 |
| 2 | 77248689 | 77357724 - | NM_001113400 | Zfp385b | 3704   | 77353820 | 77354020 |
| 2 | 77248689 | 77654874 - | NM_178723    | Zfp385b | 294297 | 77360377 | 77360577 |
| 2 | 77248689 | 77654874 - | NM_178723    | Zfp385b | 300854 | 77353820 | 77354020 |
| 2 | 79547937 | 79658704 + | NM_001290743 | Ppp1r1c | 14703  | 79562640 | 79562840 |
| 2 | 79547937 | 79650898 + | NM_001290744 | Ppp1r1c | 14703  | 79562640 | 79562840 |
| 2 | 79547937 | 79650898 + | NM_172420    | Ppp1r1c | 14703  | 79562640 | 79562840 |



|   |          |            |              |               |       |          |          |
|---|----------|------------|--------------|---------------|-------|----------|----------|
| 2 | 79547937 | 79658704 + | NR_110979    | Ppp1r1c       | 14703 | 79562640 | 79562840 |
| 2 | 79547937 | 79650898 + | NR_110980    | Ppp1r1c       | 14703 | 79562640 | 79562840 |
| 2 | 84440938 | 84490898 - | NM_001085448 | Ctnnd1        | 31453 | 84459245 | 84459445 |
| 2 | 84440938 | 84490898 - | NM_001085448 | Ctnnd1        | 17377 | 84473321 | 84473521 |
| 2 | 84440938 | 84490898 - | NM_001085448 | Ctnnd1        | 20295 | 84470403 | 84470603 |
| 2 | 84440938 | 84490898 - | NM_001085449 | Ctnnd1        | 31453 | 84459245 | 84459445 |
| 2 | 84440938 | 84490898 - | NM_001085449 | Ctnnd1        | 17377 | 84473321 | 84473521 |
| 2 | 84440938 | 84490898 - | NM_001085449 | Ctnnd1        | 20295 | 84470403 | 84470603 |
| 2 | 84440938 | 84490898 - | NM_001085450 | Ctnnd1        | 31453 | 84459245 | 84459445 |
| 2 | 84440938 | 84490898 - | NM_001085450 | Ctnnd1        | 17377 | 84473321 | 84473521 |
| 2 | 84440938 | 84490898 - | NM_001085450 | Ctnnd1        | 20295 | 84470403 | 84470603 |
| 2 | 84440938 | 84490668 - | NM_001085453 | Ctnnd1        | 31223 | 84459245 | 84459445 |
| 2 | 84440938 | 84490668 - | NM_001085453 | Ctnnd1        | 17147 | 84473321 | 84473521 |
| 2 | 84440938 | 84490668 - | NM_001085453 | Ctnnd1        | 20065 | 84470403 | 84470603 |
| 2 | 84440938 | 84490898 - | NM_007615    | Ctnnd1        | 31453 | 84459245 | 84459445 |
| 2 | 84440938 | 84490898 - | NM_007615    | Ctnnd1        | 17377 | 84473321 | 84473521 |
| 2 | 84440938 | 84490898 - | NM_007615    | Ctnnd1        | 20295 | 84470403 | 84470603 |
| 2 | 84509378 | 84510866 - | NM_001033166 | 2700094K13Rik | -7930 | 84518796 | 84518996 |
| 2 | 84509378 | 84510866 - | NM_001033166 | 2700094K13Rik | -6953 | 84517819 | 84518019 |
| 2 | 84509378 | 84510866 - | NM_001037279 | 2700094K13Rik | -7930 | 84518796 | 84518996 |
| 2 | 84509378 | 84510866 - | NM_001037279 | 2700094K13Rik | -6953 | 84517819 | 84518019 |
| 2 | 84511468 | 84518332 - | NM_001290751 | Tmx2          | -464  | 84518796 | 84518996 |
| 2 | 84511468 | 84518332 - | NM_001290751 | Tmx2          | 313   | 84517819 | 84518019 |
| 2 | 84511468 | 84518986 - | NM_025868    | Tmx2          | 0     | 84518796 | 84518996 |
| 2 | 84511468 | 84518986 - | NM_025868    | Tmx2          | 967   | 84517819 | 84518019 |
| 2 | 84518559 | 84528373 + | NM_025885    | Med19         | 237   | 84518796 | 84518996 |
| 2 | 84518559 | 84528373 + | NM_025885    | Med19         | -540  | 84517819 | 84518019 |
| 2 | 84528077 | 84555322 - | NM_144887    | Zdhhc5        | 839   | 84554283 | 84554483 |
| 2 | 84638985 | 84650161 + | NM_019949    | Ube2l6        | 533   | 84639518 | 84639718 |
| 2 | 84638985 | 84650161 + | NM_019949    | Ube2l6        | 1532  | 84640517 | 84640717 |

|   |          |            |              |               |        |          |          |
|---|----------|------------|--------------|---------------|--------|----------|----------|
| 2 | 84651333 | 84662810 - | NM_024230    | Smtnl1        | 10504  | 84652106 | 84652306 |
| 2 | 84712103 | 84726850 - | NM_199223    | Rtn4rl2       | -8975  | 84735825 | 84736025 |
| 2 | 84836709 | 84875992 - | NM_145526    | P2rx3         | 28022  | 84847770 | 84847970 |
| 2 | 84836709 | 84875992 - | NM_145526    | P2rx3         | -1801  | 84877793 | 84877993 |
| 2 | 84877277 | 84887272 + | NM_182990    | Ssrp1         | 516    | 84877793 | 84877993 |
| 2 | 84877608 | 84887272 + | NM_001136081 | Ssrp1         | 185    | 84877793 | 84877993 |
| 2 | 84913771 | 84926619 - | NR_040504    | 4930443O20Rik | -6586  | 84933205 | 84933405 |
| 2 | 88692109 | 88693039 + | NM_146463    | Olfr1204      | -6555  | 88685354 | 88685554 |
| 2 | 88964951 | 88965887 - | NM_001011860 | Olfr1222      | -8609  | 88974496 | 88974696 |
| 2 | 90269913 | 90319332 - | NM_001135657 | Ptprj         | -403   | 90319735 | 90319935 |
| 2 | 90269913 | 90319332 - | NM_001135657 | Ptprj         | -1862  | 90321194 | 90321394 |
| 2 | 90269913 | 90319332 - | NM_001135657 | Ptprj         | 1697   | 90317435 | 90317635 |
| 2 | 90273046 | 90420805 - | NM_008982    | Ptprj         | 100870 | 90319735 | 90319935 |
| 2 | 90273046 | 90420805 - | NM_008982    | Ptprj         | 67526  | 90353079 | 90353279 |
| 2 | 90273046 | 90420805 - | NM_008982    | Ptprj         | 88583  | 90332022 | 90332222 |
| 2 | 90273046 | 90420805 - | NM_008982    | Ptprj         | 85916  | 90334689 | 90334889 |
| 2 | 90273046 | 90420805 - | NM_008982    | Ptprj         | 99411  | 90321194 | 90321394 |
| 2 | 90273046 | 90420805 - | NM_008982    | Ptprj         | 103170 | 90317435 | 90317635 |
| 2 | 90687312 | 90706792 + | NM_019758    | Mtch2         | -1579  | 90685533 | 90685733 |
| 2 | 91024218 | 91035274 - | NM_001177730 | Nr1h3         | -253   | 91035527 | 91035727 |
| 2 | 91024218 | 91035193 - | NM_013839    | Nr1h3         | -334   | 91035527 | 91035727 |
| 2 | 91043069 | 91054256 + | NM_007387    | Acp2          | -7342  | 91035527 | 91035727 |
| 2 | 91096322 | 91104838 + | NM_001289677 | Pacsin3       | 120    | 91096442 | 91096642 |
| 2 | 91096970 | 91104838 + | NM_001289678 | Pacsin3       | -328   | 91096442 | 91096642 |
| 2 | 91096970 | 91104838 + | NM_030880    | Pacsin3       | -328   | 91096442 | 91096642 |
| 2 | 91097486 | 91104838 + | NM_028733    | Pacsin3       | -844   | 91096442 | 91096642 |
| 2 | 91105272 | 91117529 + | NM_001166024 | Arfgap2       | -8630  | 91096442 | 91096642 |
| 2 | 91105272 | 91117529 + | NM_023854    | Arfgap2       | -8630  | 91096442 | 91096642 |
| 2 | 91113397 | 91284872 - | NM_001311144 | 1110051M20Rik | -8041  | 91292913 | 91293113 |
| 2 | 91113397 | 91284872 - | NM_001311144 | 1110051M20Rik | 135924 | 91148748 | 91148948 |

|   |          |            |              |               |        |          |          |
|---|----------|------------|--------------|---------------|--------|----------|----------|
| 2 | 91113397 | 91284872 - | NM_001311144 | 1110051M20Rik | 56789  | 91227883 | 91228083 |
| 2 | 91113397 | 91284872 - | NM_001311144 | 1110051M20Rik | 45387  | 91239285 | 91239485 |
| 2 | 91113397 | 91284872 - | NM_001311144 | 1110051M20Rik | 57282  | 91227390 | 91227590 |
| 2 | 91113397 | 91284872 - | NM_001311144 | 1110051M20Rik | 156808 | 91127864 | 91128064 |
| 2 | 91117985 | 91284800 - | NM_175123    | 1110051M20Rik | -8113  | 91292913 | 91293113 |
| 2 | 91117985 | 91284800 - | NM_175123    | 1110051M20Rik | 135852 | 91148748 | 91148948 |
| 2 | 91117985 | 91284800 - | NM_175123    | 1110051M20Rik | 56717  | 91227883 | 91228083 |
| 2 | 91117985 | 91284800 - | NM_175123    | 1110051M20Rik | 45315  | 91239285 | 91239485 |
| 2 | 91117985 | 91284800 - | NM_175123    | 1110051M20Rik | 57210  | 91227390 | 91227590 |
| 2 | 91117985 | 91284800 - | NM_175123    | 1110051M20Rik | 156736 | 91127864 | 91128064 |
| 2 | 91297688 | 91319445 + | NM_001145857 | Lrp4          | -4575  | 91292913 | 91293113 |
| 2 | 91297688 | 91354059 + | NM_172668    | Lrp4          | -4575  | 91292913 | 91293113 |
| 2 | 91297688 | 91354059 + | NM_172668    | Lrp4          | 22482  | 91320170 | 91320370 |
| 2 | 91490275 | 91512478 + | NM_001145902 | Arhgap1       | 16655  | 91506930 | 91507130 |
| 2 | 91490275 | 91512478 + | NR_027371    | Arhgap1       | 16655  | 91506930 | 91507130 |
| 2 | 91490275 | 91512478 + | NR_027372    | Arhgap1       | 16655  | 91506930 | 91507130 |
| 2 | 91490275 | 91512478 + | NR_027373    | Arhgap1       | 16655  | 91506930 | 91507130 |
| 2 | 91493365 | 91512478 + | NM_146124    | Arhgap1       | 13565  | 91506930 | 91507130 |
| 2 | 91570295 | 91759007 + | NM_001080754 | Ambra1        | 84242  | 91654537 | 91654737 |
| 2 | 91570295 | 91759007 + | NM_001080754 | Ambra1        | 182539 | 91752834 | 91753034 |
| 2 | 91570295 | 91759007 + | NM_001080754 | Ambra1        | 52345  | 91622640 | 91622840 |
| 2 | 91570295 | 91759007 + | NM_172669    | Ambra1        | 84242  | 91654537 | 91654737 |
| 2 | 91570295 | 91759007 + | NM_172669    | Ambra1        | 182539 | 91752834 | 91753034 |
| 2 | 91570295 | 91759007 + | NM_172669    | Ambra1        | 52345  | 91622640 | 91622840 |
| 2 | 91762346 | 91769987 + | NM_007699    | Chrm4         | -9312  | 91752834 | 91753034 |
| 2 | 91772979 | 91803721 - | NM_138306    | Dgkz          | 15090  | 91788431 | 91788631 |
| 2 | 91772984 | 91790506 - | NM_001166597 | Dgkz          | 1875   | 91788431 | 91788631 |
| 2 | 91785027 | 91785088 - | NR_105965    | Mir6999       | -3343  | 91788431 | 91788631 |
| 2 | 92205203 | 92211215 - | NM_001166633 | Gylt1b        | -1914  | 92213129 | 92213329 |
| 2 | 92205203 | 92211215 - | NM_001290773 | Gylt1b        | -1914  | 92213129 | 92213329 |

|   |          |            |              |               |       |          |          |
|---|----------|------------|--------------|---------------|-------|----------|----------|
| 2 | 92205203 | 92211215 - | NM_001290774 | Gyltl1b       | -1914 | 92213129 | 92213329 |
| 2 | 92205203 | 92211215 - | NM_001290775 | Gyltl1b       | -1914 | 92213129 | 92213329 |
| 2 | 92205203 | 92211215 - | NM_172670    | Gyltl1b       | -1914 | 92213129 | 92213329 |
| 2 | 92214833 | 92221378 + | NR_028114    | Pex16         | -1504 | 92213129 | 92213329 |
| 2 | 92215396 | 92221378 + | NM_145122    | Pex16         | -2067 | 92213129 | 92213329 |
| 2 | 92223075 | 92223761 + | NM_183112    | 1700029I15Rik | -9746 | 92213129 | 92213329 |
| 2 | 92243804 | 92274227 - | NM_009963    | Cry2          | -6730 | 92280957 | 92281157 |
| 2 | 92815063 | 92886302 - | NM_001177536 | Prdm11        | 2137  | 92883965 | 92884165 |
| 2 | 93243704 | 93257988 + | NR_040529    | Gm13807       | 8721  | 93252425 | 93252625 |
| 2 | 93259259 | 93303108 - | NM_001136055 | Cd82          | -8433 | 93311541 | 93311741 |
| 2 | 93259259 | 93303108 - | NM_001136055 | Cd82          | 16134 | 93286774 | 93286974 |
| 2 | 93259259 | 93303108 - | NM_001136055 | Cd82          | 7888  | 93295020 | 93295220 |
| 2 | 93259259 | 93303108 - | NM_001136055 | Cd82          | 17418 | 93285490 | 93285690 |
| 2 | 93259259 | 93302660 - | NM_001271430 | Cd82          | -8881 | 93311541 | 93311741 |
| 2 | 93259259 | 93302660 - | NM_001271430 | Cd82          | 15686 | 93286774 | 93286974 |
| 2 | 93259259 | 93302660 - | NM_001271430 | Cd82          | 7440  | 93295020 | 93295220 |
| 2 | 93259259 | 93302660 - | NM_001271430 | Cd82          | 16970 | 93285490 | 93285690 |
| 2 | 93259259 | 93303108 - | NM_001271431 | Cd82          | -8433 | 93311541 | 93311741 |
| 2 | 93259259 | 93303108 - | NM_001271431 | Cd82          | 16134 | 93286774 | 93286974 |
| 2 | 93259259 | 93303108 - | NM_001271431 | Cd82          | 7888  | 93295020 | 93295220 |
| 2 | 93259259 | 93303108 - | NM_001271431 | Cd82          | 17418 | 93285490 | 93285690 |
| 2 | 93259259 | 93302660 - | NM_001271432 | Cd82          | -8881 | 93311541 | 93311741 |
| 2 | 93259259 | 93302660 - | NM_001271432 | Cd82          | 15686 | 93286774 | 93286974 |
| 2 | 93259259 | 93302660 - | NM_001271432 | Cd82          | 7440  | 93295020 | 93295220 |
| 2 | 93259259 | 93302660 - | NM_001271432 | Cd82          | 16970 | 93285490 | 93285690 |
| 2 | 93259259 | 93302009 - | NM_001271461 | Cd82          | -9532 | 93311541 | 93311741 |
| 2 | 93259259 | 93302009 - | NM_001271461 | Cd82          | 15035 | 93286774 | 93286974 |
| 2 | 93259259 | 93302009 - | NM_001271461 | Cd82          | 6789  | 93295020 | 93295220 |
| 2 | 93259259 | 93302009 - | NM_001271461 | Cd82          | 16319 | 93285490 | 93285690 |
| 2 | 93259259 | 93292830 - | NM_001271462 | Cd82          | 5856  | 93286774 | 93286974 |

|   |           |             |              |               |        |           |           |
|---|-----------|-------------|--------------|---------------|--------|-----------|-----------|
| 2 | 93259259  | 93292830 -  | NM_001271462 | Cd82          | -2190  | 93295020  | 93295220  |
| 2 | 93259259  | 93292830 -  | NM_001271462 | Cd82          | 7140   | 93285490  | 93285690  |
| 2 | 93259259  | 93302660 -  | NM_007656    | Cd82          | -8881  | 93311541  | 93311741  |
| 2 | 93259259  | 93302660 -  | NM_007656    | Cd82          | 15686  | 93286774  | 93286974  |
| 2 | 93259259  | 93302660 -  | NM_007656    | Cd82          | 7440   | 93295020  | 93295220  |
| 2 | 93259259  | 93302660 -  | NM_007656    | Cd82          | 16970  | 93285490  | 93285690  |
| 2 | 93292976  | 93310032 +  | NR_040532    | Gm10804       | -6002  | 93286774  | 93286974  |
| 2 | 93292976  | 93310032 +  | NR_040532    | Gm10804       | 2044   | 93295020  | 93295220  |
| 2 | 93292976  | 93310032 +  | NR_040532    | Gm10804       | -7286  | 93285490  | 93285690  |
| 2 | 93292976  | 93296879 +  | NR_040533    | Gm10804       | -6002  | 93286774  | 93286974  |
| 2 | 93292976  | 93296879 +  | NR_040533    | Gm10804       | 2044   | 93295020  | 93295220  |
| 2 | 93292976  | 93296879 +  | NR_040533    | Gm10804       | -7286  | 93285490  | 93285690  |
| 2 | 93535788  | 93662726 -  | NM_010163    | Ext2          | 417    | 93662109  | 93662309  |
| 2 | 93535788  | 93662726 -  | NM_010163    | Ext2          | 91351  | 93571175  | 93571375  |
| 2 | 93535788  | 93662726 -  | NM_010163    | Ext2          | 84653  | 93577873  | 93578073  |
| 2 | 93673624  | 93690101 -  | NM_001290782 | Accs          | -468   | 93690569  | 93690769  |
| 2 | 93673624  | 93690101 -  | NM_001290782 | Accs          | 12845  | 93677056  | 93677256  |
| 2 | 93673624  | 93689957 -  | NM_183220    | Accs          | -612   | 93690569  | 93690769  |
| 2 | 93673624  | 93689957 -  | NM_183220    | Accs          | 12701  | 93677056  | 93677256  |
| 2 | 93820791  | 93850888 -  | NM_026944    | Alkbh3        | 0      | 93850832  | 93851032  |
| 2 | 93872854  | 93998067 -  | NM_019657    | Hsd17b12      | 113407 | 93884460  | 93884660  |
| 2 | 93872854  | 93998067 -  | NM_019657    | Hsd17b12      | 115977 | 93881890  | 93882090  |
| 2 | 94140923  | 94246847 -  | NM_183106    | Ttc17         | 4723   | 94241924  | 94242124  |
| 2 | 94246864  | 94251838 +  | NR_027831    | 2810002D19Rik | -4740  | 94241924  | 94242124  |
| 2 | 94251884  | 94278344 -  | NM_001305258 | Api5          | 5778   | 94272366  | 94272566  |
| 2 | 94251884  | 94278344 -  | NM_007466    | Api5          | 5778   | 94272366  | 94272566  |
| 2 | 101400938 | 101469144 - | NM_026592    | B230118H07Rik | 61205  | 101407739 | 101407939 |
| 2 | 101554442 | 101679138 - | NM_001110849 | Prr5l         | 29340  | 101649598 | 101649798 |
| 2 | 101554442 | 101679138 - | NM_001110849 | Prr5l         | 10936  | 101668002 | 101668202 |
| 2 | 101554442 | 101679138 - | NM_001110849 | Prr5l         | 28693  | 101650245 | 101650445 |

|   |           |             |              |        |       |           |           |
|---|-----------|-------------|--------------|--------|-------|-----------|-----------|
| 2 | 102498840 | 102630942 + | NM_001077514 | Slc1a2 | 23966 | 102522806 | 102523006 |
| 2 | 102498840 | 102630942 + | NM_001077514 | Slc1a2 | 86618 | 102585458 | 102585658 |
| 2 | 102498840 | 102630942 + | NM_001077514 | Slc1a2 | 85147 | 102583987 | 102584187 |
| 2 | 102546595 | 102630942 + | NM_001077515 | Slc1a2 | 38863 | 102585458 | 102585658 |
| 2 | 102546595 | 102630942 + | NM_001077515 | Slc1a2 | 37392 | 102583987 | 102584187 |
| 2 | 102546595 | 102618264 + | NM_011393    | Slc1a2 | 38863 | 102585458 | 102585658 |
| 2 | 102546595 | 102618264 + | NM_011393    | Slc1a2 | 37392 | 102583987 | 102584187 |
| 2 | 102651300 | 102741823 - | NM_001039150 | Cd44   | 75266 | 102666357 | 102666557 |
| 2 | 102651300 | 102741823 - | NM_001039151 | Cd44   | 75266 | 102666357 | 102666557 |
| 2 | 102651300 | 102741823 - | NM_001177785 | Cd44   | 75266 | 102666357 | 102666557 |
| 2 | 102651300 | 102741823 - | NM_001177786 | Cd44   | 75266 | 102666357 | 102666557 |
| 2 | 102651300 | 102741823 - | NM_001177787 | Cd44   | 75266 | 102666357 | 102666557 |
| 2 | 102651300 | 102741823 - | NM_009851    | Cd44   | 75266 | 102666357 | 102666557 |
| 2 | 103103590 | 103143354 - | NM_007914    | Ehf    | 4176  | 103138978 | 103139178 |
| 2 | 103103590 | 103143354 - | NM_007914    | Ehf    | 3806  | 103139348 | 103139548 |
| 2 | 103103590 | 103143354 - | NM_007914    | Ehf    | 21755 | 103121399 | 103121599 |
| 2 | 103252255 | 103291146 + | NM_001145813 | Elf5   | 1365  | 103253620 | 103253820 |
| 2 | 103294061 | 103325311 - | NM_009804    | Cat    | 17498 | 103307613 | 103307813 |
| 2 | 103406467 | 103558581 + | NM_178890    | Abtb2  | -9920 | 103396347 | 103396547 |
| 2 | 103561416 | 103601408 - | NM_153126    | Nat10  | 5534  | 103595674 | 103595874 |
| 2 | 103561416 | 103601408 - | NM_153126    | Nat10  | 776   | 103600432 | 103600632 |
| 2 | 104266639 | 104334647 - | NM_001145824 | Hipk3  | 1206  | 104333241 | 104333441 |
| 2 | 104266639 | 104334647 - | NM_001145824 | Hipk3  | 37841 | 104296606 | 104296806 |
| 2 | 104266639 | 104334647 - | NM_010434    | Hipk3  | 1206  | 104333241 | 104333441 |
| 2 | 104266639 | 104334647 - | NM_010434    | Hipk3  | 37841 | 104296606 | 104296806 |
| 2 | 104430641 | 104449587 + | NM_001037326 | Cstf3  | 7936  | 104438577 | 104438777 |
| 2 | 104430641 | 104505583 + | NM_145529    | Cstf3  | 7936  | 104438577 | 104438777 |
| 2 | 104430641 | 104451564 + | NM_177253    | Cstf3  | 7936  | 104438577 | 104438777 |
| 2 | 104561944 | 104582959 - | NM_144804    | Depdc7 | -386  | 104583345 | 104583545 |
| 2 | 104594950 | 104656854 - | NM_001123327 | Qser1  | -1046 | 104657900 | 104658100 |

|   |           |             |              |         |        |           |           |
|---|-----------|-------------|--------------|---------|--------|-----------|-----------|
| 2 | 105064499 | 105220018 + | NM_001159638 | Them7   | -8125  | 105056174 | 105056374 |
| 2 | 105064499 | 105220018 + | NM_028747    | Them7   | -8125  | 105056174 | 105056374 |
| 2 | 109742553 | 109753477 - | NR_033473    | Platr8  | -8180  | 109761657 | 109761857 |
| 2 | 109757804 | 109854415 + | NM_172671    | Lgr4    | 3853   | 109761657 | 109761857 |
| 2 | 109757804 | 109854415 + | NM_172671    | Lgr4    | 77537  | 109835341 | 109835541 |
| 2 | 109757804 | 109854415 + | NM_172671    | Lgr4    | 75129  | 109832933 | 109833133 |
| 2 | 110105240 | 110145883 - | NM_130452    | Bbox1   | 0      | 110145719 | 110145919 |
| 2 | 110105240 | 110145883 - | NM_130452    | Bbox1   | 2715   | 110142968 | 110143168 |
| 2 | 110437456 | 110489503 + | NM_001003915 | Slc5a12 | 39528  | 110476984 | 110477184 |
| 2 | 110437456 | 110489503 + | NM_001177624 | Slc5a12 | 39528  | 110476984 | 110477184 |
| 2 | 112088105 | 112099449 - | NM_172521    | Nutm1   | 4058   | 112095191 | 112095391 |
| 2 | 112088105 | 112099449 - | NM_172521    | Nutm1   | -6979  | 112106428 | 112106628 |
| 2 | 112102083 | 112103056 + | NM_025403    | Nop10   | -6692  | 112095191 | 112095391 |
| 2 | 112106471 | 112203321 + | NM_133649    | Slc12a6 | 43021  | 112149492 | 112149692 |
| 2 | 112106471 | 112203321 + | NM_133649    | Slc12a6 | 65834  | 112172305 | 112172505 |
| 2 | 112106471 | 112203321 + | NM_133649    | Slc12a6 | 0      | 112106428 | 112106628 |
| 2 | 112124845 | 112203321 + | NM_133648    | Slc12a6 | 24647  | 112149492 | 112149692 |
| 2 | 112124845 | 112203321 + | NM_133648    | Slc12a6 | 47460  | 112172305 | 112172505 |
| 2 | 113167893 | 113556925 + | NM_001285458 | Fmn1    | 141577 | 113309470 | 113309670 |
| 2 | 113167893 | 113556925 + | NM_001285458 | Fmn1    | 340780 | 113508673 | 113508873 |
| 2 | 113167893 | 113556925 + | NM_001285458 | Fmn1    | 264144 | 113432037 | 113432237 |
| 2 | 113167893 | 113556925 + | NM_001285458 | Fmn1    | 322908 | 113490801 | 113491001 |
| 2 | 113167893 | 113556925 + | NM_001285458 | Fmn1    | 151582 | 113319475 | 113319675 |
| 2 | 113167893 | 113556925 + | NM_001285458 | Fmn1    | 73340  | 113241233 | 113241433 |
| 2 | 113167893 | 113556925 + | NM_001285458 | Fmn1    | 140339 | 113308232 | 113308432 |
| 2 | 113167893 | 113556925 + | NM_010230    | Fmn1    | 141577 | 113309470 | 113309670 |
| 2 | 113167893 | 113556925 + | NM_010230    | Fmn1    | 340780 | 113508673 | 113508873 |
| 2 | 113167893 | 113556925 + | NM_010230    | Fmn1    | 264144 | 113432037 | 113432237 |
| 2 | 113167893 | 113556925 + | NM_010230    | Fmn1    | 322908 | 113490801 | 113491001 |
| 2 | 113167893 | 113556925 + | NM_010230    | Fmn1    | 151582 | 113319475 | 113319675 |

|   |           |             |              |               |        |           |           |
|---|-----------|-------------|--------------|---------------|--------|-----------|-----------|
| 2 | 113167893 | 113556925 + | NM_010230    | Fmn1          | 73340  | 113241233 | 113241433 |
| 2 | 113167893 | 113556925 + | NM_010230    | Fmn1          | 140339 | 113308232 | 113308432 |
| 2 | 113281221 | 113556925 + | NM_001285459 | Fmn1          | 28249  | 113309470 | 113309670 |
| 2 | 113281221 | 113556925 + | NM_001285459 | Fmn1          | 227452 | 113508673 | 113508873 |
| 2 | 113281221 | 113556925 + | NM_001285459 | Fmn1          | 150816 | 113432037 | 113432237 |
| 2 | 113281221 | 113556925 + | NM_001285459 | Fmn1          | 209580 | 113490801 | 113491001 |
| 2 | 113281221 | 113556925 + | NM_001285459 | Fmn1          | 38254  | 113319475 | 113319675 |
| 2 | 113281221 | 113556925 + | NM_001285459 | Fmn1          | 27011  | 113308232 | 113308432 |
| 2 | 113671650 | 113688819 - | NM_181416    | Arhgap11a     | 6645   | 113681974 | 113682174 |
| 2 | 114342154 | 114480665 - | NM_025675    | Dph6          | 73959  | 114406506 | 114406706 |
| 2 | 114342154 | 114480665 - | NM_025675    | Dph6          | 22200  | 114458265 | 114458465 |
| 2 | 115687000 | 115890795 - | NM_001136072 | Meis2         | 79899  | 115810696 | 115810896 |
| 2 | 115687000 | 115890795 - | NM_001136072 | Meis2         | 85466  | 115805129 | 115805329 |
| 2 | 115687000 | 115890795 - | NM_001159567 | Meis2         | 79899  | 115810696 | 115810896 |
| 2 | 115687000 | 115890795 - | NM_001159567 | Meis2         | 85466  | 115805129 | 115805329 |
| 2 | 115687000 | 115890795 - | NM_001159568 | Meis2         | 79899  | 115810696 | 115810896 |
| 2 | 115687000 | 115890795 - | NM_001159568 | Meis2         | 85466  | 115805129 | 115805329 |
| 2 | 115687000 | 115890358 - | NM_001159569 | Meis2         | 79462  | 115810696 | 115810896 |
| 2 | 115687000 | 115890358 - | NM_001159569 | Meis2         | 85029  | 115805129 | 115805329 |
| 2 | 115687000 | 115890358 - | NM_001159570 | Meis2         | 79462  | 115810696 | 115810896 |
| 2 | 115687000 | 115890358 - | NM_001159570 | Meis2         | 85029  | 115805129 | 115805329 |
| 2 | 115687000 | 115890795 - | NM_010825    | Meis2         | 79899  | 115810696 | 115810896 |
| 2 | 115687000 | 115890795 - | NM_010825    | Meis2         | 85466  | 115805129 | 115805329 |
| 2 | 115900284 | 115901833 - | NR_033447    | 2810405F15Rik | -1647  | 115903480 | 115903680 |
| 2 | 116946807 | 116998590 + | NM_001277256 | Spred1        | -2262  | 116944345 | 116944545 |
| 2 | 116946807 | 117008014 + | NM_033524    | Spred1        | -2262  | 116944345 | 116944545 |
| 2 | 117683027 | 117936939 - | NR_126479    | Gm13986       | 473    | 117936266 | 117936466 |
| 2 | 117937658 | 117952870 + | NM_011580    | Thbs1         | -1192  | 117936266 | 117936466 |
| 2 | 118489313 | 118523757 + | NM_001033254 | Pak6          | 8197   | 118497510 | 118497710 |
| 2 | 118489313 | 118523757 + | NM_001033254 | Pak6          | -3792  | 118485321 | 118485521 |



|   |           |             |              |               |       |           |           |
|---|-----------|-------------|--------------|---------------|-------|-----------|-----------|
| 2 | 118489313 | 118523757 + | NM_001033254 | Pak6          | -1378 | 118487735 | 118487935 |
| 2 | 118502982 | 118523757 + | NM_001145854 | Pak6          | -5272 | 118497510 | 118497710 |
| 2 | 118579881 | 118588398 - | NM_001001982 | A430105I19Rik | -2747 | 118591145 | 118591345 |
| 2 | 118579881 | 118588398 - | NM_001001982 | A430105I19Rik | 2617  | 118585581 | 118585781 |
| 2 | 118598505 | 118603901 + | NM_001145644 | Phgr1         | -7160 | 118591145 | 118591345 |
| 2 | 118605455 | 118620912 + | NM_170593    | Disp2         | -332  | 118604923 | 118605123 |
| 2 | 118605455 | 118620912 + | NM_170593    | Disp2         | -966  | 118604289 | 118604489 |
| 2 | 118962734 | 118982771 - | NM_001033136 | Rmdn3         | -6177 | 118988948 | 118989148 |
| 2 | 118993524 | 118998126 + | NM_177157    | Gchfr         | -4376 | 118988948 | 118989148 |
| 2 | 119043855 | 119055602 - | NM_001290796 | Ppp1r14d      | -1572 | 119057174 | 119057374 |
| 2 | 119043855 | 119055602 - | NM_028104    | Ppp1r14d      | -1572 | 119057174 | 119057374 |
| 2 | 119063096 | 119075250 + | NM_016907    | Spint1        | 2913  | 119066009 | 119066209 |
| 2 | 119063096 | 119075250 + | NM_016907    | Spint1        | 3547  | 119066643 | 119066843 |
| 2 | 119063096 | 119075250 + | NM_016907    | Spint1        | -5722 | 119057174 | 119057374 |
| 2 | 119345140 | 119373364 - | NM_172857    | Exd1          | 22687 | 119350477 | 119350677 |
| 2 | 119568073 | 119576990 + | NM_146125    | Itпка         | -1225 | 119566648 | 119566848 |
| 2 | 119568073 | 119576990 + | NM_146125    | Itпка         | 1960  | 119570033 | 119570233 |
| 2 | 119568073 | 119576990 + | NM_146125    | Itпка         | -138  | 119567735 | 119567935 |
| 2 | 119568073 | 119576990 + | NM_146125    | Itпка         | -4912 | 119562961 | 119563161 |
| 2 | 119992148 | 120071072 - | NM_177845    | Pla2g4e       | 51490 | 120019382 | 120019582 |
| 2 | 120429974 | 120435245 - | NM_001159609 | Lrrc57        | -5718 | 120440963 | 120441163 |
| 2 | 120429974 | 120435245 - | NM_001159610 | Lrrc57        | -5718 | 120440963 | 120441163 |
| 2 | 120429974 | 120435095 - | NM_001159612 | Lrrc57        | -5868 | 120440963 | 120441163 |
| 2 | 120429974 | 120435052 - | NM_025657    | Lrrc57        | -5911 | 120440963 | 120441163 |
| 2 | 120429974 | 120435245 - | NR_027510    | Lrrc57        | -5718 | 120440963 | 120441163 |
| 2 | 120435118 | 120447296 + | NM_001290808 | Haus2         | 5845  | 120440963 | 120441163 |
| 2 | 120435118 | 120447296 + | NM_025475    | Haus2         | 5845  | 120440963 | 120441163 |
| 2 | 120435331 | 120447296 + | NM_001290807 | Haus2         | 5632  | 120440963 | 120441163 |
| 2 | 121020571 | 121097144 - | NM_001290830 | Trp53bp1      | 53125 | 121043819 | 121044019 |
| 2 | 121020571 | 121097144 - | NM_013735    | Trp53bp1      | 53125 | 121043819 | 121044019 |

|   |           |             |              |          |        |           |           |
|---|-----------|-------------|--------------|----------|--------|-----------|-----------|
| 2 | 121136297 | 121176750 - | NM_178795    | Ppip5k1  | 2428   | 121174122 | 121174322 |
| 2 | 121136297 | 121176750 - | NM_178795    | Ppip5k1  | -9056  | 121185806 | 121186006 |
| 2 | 121136297 | 121176750 - | NM_178795    | Ppip5k1  | 14482  | 121162068 | 121162268 |
| 2 | 121184377 | 121189474 + | NM_009897    | Ckmt1    | 1429   | 121185806 | 121186006 |
| 2 | 121276913 | 121282501 - | NM_001025371 | Serinc4  | -215   | 121282716 | 121282916 |
| 2 | 121282824 | 121284177 + | NM_026318    | Hypk     | 0      | 121282716 | 121282916 |
| 2 | 121854316 | 121879369 + | NM_144545    | Eif3j1   | 775    | 121855091 | 121855291 |
| 2 | 121854319 | 121879368 + | NM_001256055 | Eif3j2   | 772    | 121855091 | 121855291 |
| 2 | 121945844 | 122011926 - | NM_026251    | Patl2    | 47822  | 121963904 | 121964104 |
| 2 | 121973423 | 121978819 + | NM_009735    | B2m      | -9319  | 121963904 | 121964104 |
| 2 | 122060575 | 122091074 + | NM_146126    | Sord     | 254    | 122060829 | 122061029 |
| 2 | 122060575 | 122091074 + | NM_146126    | Sord     | 8328   | 122068903 | 122069103 |
| 2 | 122106173 | 122123902 - | NM_177610    | Duox2    | -4518  | 122128420 | 122128620 |
| 2 | 122124636 | 122128622 + | NM_025777    | Duoxa2   | 3784   | 122128420 | 122128620 |
| 2 | 122174628 | 122194655 - | NM_001013829 | Shf      | 1197   | 122193258 | 122193458 |
| 2 | 122463623 | 122466813 + | NM_001004174 | AA467197 | 780    | 122464403 | 122464603 |
| 2 | 122466539 | 122466618 + | NR_030547    | Mir147   | -1936  | 122464403 | 122464603 |
| 2 | 122506969 | 122528400 - | NM_001290993 | Slc30a4  | -5452  | 122533852 | 122534052 |
| 2 | 122506969 | 122528400 - | NM_001290993 | Slc30a4  | 20613  | 122507587 | 122507787 |
| 2 | 122506969 | 122528400 - | NM_011774    | Slc30a4  | -5452  | 122533852 | 122534052 |
| 2 | 122506969 | 122528400 - | NM_011774    | Slc30a4  | 20613  | 122507587 | 122507787 |
| 2 | 122591095 | 122635288 + | NM_001162503 | Sqrdl    | -3589  | 122587306 | 122587506 |
| 2 | 122597449 | 122635288 + | NR_027888    | Sqrdl    | -9943  | 122587306 | 122587506 |
| 2 | 123915705 | 124493526 + | NM_001290997 | Sema6d   | 513502 | 124429207 | 124429407 |
| 2 | 123915705 | 124493526 + | NM_001290997 | Sema6d   | 532436 | 124448141 | 124448341 |
| 2 | 123915705 | 124493526 + | NM_001290997 | Sema6d   | 529029 | 124444734 | 124444934 |
| 2 | 123915705 | 124493526 + | NM_001290997 | Sema6d   | 508566 | 124424271 | 124424471 |
| 2 | 123915705 | 124493526 + | NM_001290997 | Sema6d   | 506615 | 124422320 | 124422520 |
| 2 | 124436032 | 124493526 + | NM_001291000 | Sema6d   | -6625  | 124429207 | 124429407 |
| 2 | 124436032 | 124493526 + | NM_001291000 | Sema6d   | 12109  | 124448141 | 124448341 |

|   |           |             |              |               |       |           |           |
|---|-----------|-------------|--------------|---------------|-------|-----------|-----------|
| 2 | 124436032 | 124493526 + | NM_001291000 | Sema6d        | 8702  | 124444734 | 124444934 |
| 2 | 124436032 | 124493526 + | NM_172537    | Sema6d        | -6625 | 124429207 | 124429407 |
| 2 | 124436032 | 124493526 + | NM_172537    | Sema6d        | 12109 | 124448141 | 124448341 |
| 2 | 124436032 | 124493526 + | NM_172537    | Sema6d        | 8702  | 124444734 | 124444934 |
| 2 | 124436032 | 124493526 + | NM_199238    | Sema6d        | -6625 | 124429207 | 124429407 |
| 2 | 124436032 | 124493526 + | NM_199238    | Sema6d        | 12109 | 124448141 | 124448341 |
| 2 | 124436032 | 124493526 + | NM_199238    | Sema6d        | 8702  | 124444734 | 124444934 |
| 2 | 125656038 | 125684819 - | NM_001285507 | Cops2         | 0     | 125684793 | 125684993 |
| 2 | 125656038 | 125684819 - | NM_001285512 | Cops2         | 0     | 125684793 | 125684993 |
| 2 | 125656038 | 125684819 - | NM_001285513 | Cops2         | 0     | 125684793 | 125684993 |
| 2 | 125656038 | 125684819 - | NM_009939    | Cops2         | 0     | 125684793 | 125684993 |
| 2 | 125684845 | 125810035 + | NM_175154    | Galk2         | 0     | 125684793 | 125684993 |
| 2 | 125691959 | 125810035 + | NM_001291002 | Galk2         | -6966 | 125684793 | 125684993 |
| 2 | 126617294 | 126701998 - | NM_001164325 | Trpm7         | 26713 | 126675085 | 126675285 |
| 2 | 126617294 | 126701998 - | NM_021450    | Trpm7         | 26713 | 126675085 | 126675285 |
| 2 | 127161895 | 127164114 + | NM_010090    | Dusp2         | -1388 | 127160307 | 127160507 |
| 2 | 127164375 | 127183392 + | NM_172539    | Astl          | -3868 | 127160307 | 127160507 |
| 2 | 127167372 | 127183392 + | NM_001291003 | Astl          | -6865 | 127160307 | 127160507 |
| 2 | 127680364 | 127949629 + | NM_028765    | Acox1         | 43152 | 127723516 | 127723716 |
| 2 | 127680364 | 127949629 + | NM_028765    | Acox1         | 34972 | 127715336 | 127715536 |
| 2 | 128124399 | 128255088 - | NR_028589    | Gm14005       | 64823 | 128190065 | 128190265 |
| 2 | 128142036 | 128255088 - | NR_028590    | Gm14005       | 64823 | 128190065 | 128190265 |
| 2 | 128524733 | 128627925 + | NM_008587    | Mertk         | 66982 | 128591715 | 128591915 |
| 2 | 128524733 | 128627925 + | NM_008587    | Mertk         | 22528 | 128547261 | 128547461 |
| 2 | 128793138 | 128844300 + | NM_178404    | Zc3h6         | -113  | 128792825 | 128793025 |
| 2 | 129024509 | 129030841 + | NM_001159593 | Slc20a1       | 4734  | 129029243 | 129029443 |
| 2 | 129024509 | 129037349 + | NM_015747    | Slc20a1       | 4734  | 129029243 | 129029443 |
| 2 | 129044705 | 129061343 + | NR_045838    | A730036I17Rik | -5733 | 129038772 | 129038972 |
| 2 | 129190316 | 129196857 - | NM_008361    | Il1b          | -5978 | 129202835 | 129203035 |
| 2 | 129624105 | 129627196 - | NR_029452    | 4932416H05Rik | -9212 | 129636408 | 129636608 |

|   |           |             |              |               |       |           |           |
|---|-----------|-------------|--------------|---------------|-------|-----------|-----------|
| 2 | 129626253 | 129658022 + | NM_001038635 | Stk35         | 10155 | 129636408 | 129636608 |
| 2 | 129626253 | 129658022 + | NM_183262    | Stk35         | 10155 | 129636408 | 129636608 |
| 2 | 129838076 | 129876136 + | NM_009374    | Tgm3          | -1468 | 129836408 | 129836608 |
| 2 | 129997372 | 130005101 - | NM_009225    | Snrpb         | -555  | 130005656 | 130005856 |
| 2 | 130276014 | 130380037 + | NM_001163688 | Ptpa          | 1777  | 130277791 | 130277991 |
| 2 | 130276014 | 130380037 + | NM_008980    | Ptpa          | 1777  | 130277791 | 130277991 |
| 2 | 130531936 | 130665424 - | NM_001311147 | 4930402H24Rik | -8669 | 130674093 | 130674293 |
| 2 | 130531936 | 130665424 - | NM_001311147 | 4930402H24Rik | -711  | 130666135 | 130666335 |
| 2 | 130531936 | 130665882 - | NM_029432    | 4930402H24Rik | -8211 | 130674093 | 130674293 |
| 2 | 130531936 | 130665882 - | NM_029432    | 4930402H24Rik | -253  | 130666135 | 130666335 |
| 2 | 130865368 | 130868825 - | NM_001136063 | Gfra4         | -1385 | 130870210 | 130870410 |
| 2 | 130865368 | 130868825 - | NM_001271001 | Gfra4         | -1385 | 130870210 | 130870410 |
| 2 | 130865368 | 130868419 - | NM_001271002 | Gfra4         | -1791 | 130870210 | 130870410 |
| 2 | 130865368 | 130868419 - | NM_020014    | Gfra4         | -1791 | 130870210 | 130870410 |
| 2 | 130866055 | 130866135 - | NR_105969    | Mir6973b      | -4075 | 130870210 | 130870410 |
| 2 | 131036096 | 131039251 + | NM_001291031 | Ap5s1         | -4629 | 131031267 | 131031467 |
| 2 | 131036096 | 131039251 + | NM_001291031 | Ap5s1         | 0     | 131036066 | 131036266 |
| 2 | 131036096 | 131039251 + | NM_001291032 | Ap5s1         | -4629 | 131031267 | 131031467 |
| 2 | 131036096 | 131039251 + | NM_001291032 | Ap5s1         | 0     | 131036066 | 131036266 |
| 2 | 131036096 | 131039251 + | NM_027129    | Ap5s1         | -4629 | 131031267 | 131031467 |
| 2 | 131036096 | 131039251 + | NM_027129    | Ap5s1         | 0     | 131036066 | 131036266 |
| 2 | 131036096 | 131039251 + | NR_110992    | Ap5s1         | -4629 | 131031267 | 131031467 |
| 2 | 131036096 | 131039251 + | NR_110992    | Ap5s1         | 0     | 131036066 | 131036266 |
| 2 | 131059799 | 131073761 + | NM_001206382 | Mavs          | 1250  | 131061049 | 131061249 |
| 2 | 131059799 | 131073761 + | NM_001206383 | Mavs          | 1250  | 131061049 | 131061249 |
| 2 | 131059799 | 131073761 + | NM_001206385 | Mavs          | 1250  | 131061049 | 131061249 |
| 2 | 131059799 | 131073761 + | NM_144888    | Mavs          | 1250  | 131061049 | 131061249 |
| 2 | 131088236 | 131124925 + | NM_153501    | Pank2         | -8492 | 131079544 | 131079744 |
| 2 | 131088236 | 131124925 + | NM_153501    | Pank2         | -1688 | 131086348 | 131086548 |
| 2 | 131878232 | 131970845 - | NM_018824    | Slc23a2       | 91837 | 131878808 | 131879008 |

|   |           |             |              |               |        |           |           |
|---|-----------|-------------|--------------|---------------|--------|-----------|-----------|
| 2 | 132354818 | 132403985 - | NM_001291050 | Gpcpd1        | -4214  | 132408199 | 132408399 |
| 2 | 132354818 | 132403985 - | NM_001291051 | Gpcpd1        | -4214  | 132408199 | 132408399 |
| 2 | 132354818 | 132403985 - | NM_001291052 | Gpcpd1        | -4214  | 132408199 | 132408399 |
| 2 | 132354818 | 132403985 - | NM_027096    | Gpcpd1        | -4214  | 132408199 | 132408399 |
| 2 | 132354818 | 132403985 - | NM_028802    | Gpcpd1        | -4214  | 132408199 | 132408399 |
| 2 | 132358461 | 132403985 - | NM_001042672 | Gpcpd1        | -4214  | 132408199 | 132408399 |
| 2 | 132516019 | 132576792 + | NM_028637    | 1110034G24Rik | 5511   | 132521530 | 132521730 |
| 2 | 132516019 | 132576792 + | NM_028637    | 1110034G24Rik | 43665  | 132559684 | 132559884 |
| 2 | 132516019 | 132576792 + | NM_028637    | 1110034G24Rik | -5510  | 132510309 | 132510509 |
| 2 | 132629951 | 132641791 - | NM_175113    | Trmt6         | 4263   | 132637328 | 132637528 |
| 2 | 132641877 | 132669925 + | NM_001291054 | Mcm8          | -4349  | 132637328 | 132637528 |
| 2 | 132641877 | 132669925 + | NM_025676    | Mcm8          | -4349  | 132637328 | 132637528 |
| 2 | 132729915 | 132771773 - | NM_198029    | Fermt1        | 2930   | 132768643 | 132768843 |
| 2 | 132729915 | 132771773 - | NM_198029    | Fermt1        | -949   | 132772722 | 132772922 |
| 2 | 132729915 | 132771773 - | NM_198029    | Fermt1        | 21931  | 132749642 | 132749842 |
| 2 | 132729915 | 132771773 - | NM_198029    | Fermt1        | 8953   | 132762620 | 132762820 |
| 2 | 132729915 | 132771773 - | NM_198029    | Fermt1        | 31809  | 132739764 | 132739964 |
| 2 | 134611900 | 135300995 + | NM_001145830 | Plcb1         | 618114 | 135230014 | 135230214 |
| 2 | 134611900 | 135300995 + | NM_001145830 | Plcb1         | 203554 | 134815454 | 134815654 |
| 2 | 134611900 | 135300995 + | NM_001145830 | Plcb1         | 459168 | 135071068 | 135071268 |
| 2 | 134611900 | 135300995 + | NM_001145830 | Plcb1         | 56897  | 134668797 | 134668997 |
| 2 | 134611900 | 135300995 + | NM_019677    | Plcb1         | 618114 | 135230014 | 135230214 |
| 2 | 134611900 | 135300995 + | NM_019677    | Plcb1         | 203554 | 134815454 | 134815654 |
| 2 | 134611900 | 135300995 + | NM_019677    | Plcb1         | 459168 | 135071068 | 135071268 |
| 2 | 134611900 | 135300995 + | NM_019677    | Plcb1         | 56897  | 134668797 | 134668997 |
| 2 | 136716954 | 136895386 + | NM_028201    | Slx4ip        | 150561 | 136867515 | 136867715 |
| 2 | 136717999 | 136894130 + | NM_028834    | Slx4ip        | 149516 | 136867515 | 136867715 |
| 2 | 136725087 | 136895515 + | NM_001038641 | Slx4ip        | 142428 | 136867515 | 136867715 |
| 2 | 140221166 | 142215787 + | NM_001013802 | MacroD2       | 894038 | 141115204 | 141115404 |
| 2 | 140221166 | 142215787 + | NM_001013802 | MacroD2       | 472448 | 140693614 | 140693814 |

|   |           |             |              |        |        |           |           |
|---|-----------|-------------|--------------|--------|--------|-----------|-----------|
| 2 | 140221166 | 142215787 + | NM_001013802 | Macro2 | 893697 | 141114863 | 141115063 |
| 2 | 140221166 | 142215787 + | NM_001013802 | Macro2 | 368169 | 140589335 | 140589535 |
| 2 | 142444081 | 142727201 - | NM_001081133 | Kif16b | 23174  | 142703827 | 142704027 |
| 2 | 142444081 | 142727201 - | NM_001081133 | Kif16b | 271325 | 142455676 | 142455876 |
| 2 | 142444081 | 142727201 - | NM_001081133 | Kif16b | 97023  | 142629978 | 142630178 |
| 2 | 143652264 | 143688910 - | NM_001291061 | Bfsp1  | -7861  | 143696771 | 143696971 |
| 2 | 143652264 | 143688910 - | NM_001291061 | Bfsp1  | 16420  | 143672290 | 143672490 |
| 2 | 143652264 | 143688910 - | NM_001291061 | Bfsp1  | 9316   | 143679394 | 143679594 |
| 2 | 143652264 | 143688910 - | NM_001291061 | Bfsp1  | 24081  | 143664629 | 143664829 |
| 2 | 143652264 | 143688910 - | NM_009751    | Bfsp1  | -7861  | 143696771 | 143696971 |
| 2 | 143652264 | 143688910 - | NM_009751    | Bfsp1  | 16420  | 143672290 | 143672490 |
| 2 | 143652264 | 143688910 - | NM_009751    | Bfsp1  | 9316   | 143679394 | 143679594 |
| 2 | 143652264 | 143688910 - | NM_009751    | Bfsp1  | 24081  | 143664629 | 143664829 |
| 2 | 143741067 | 143769061 + | NM_019771    | Dstn   | -2863  | 143738004 | 143738204 |
| 2 | 143741067 | 143769061 + | NM_019771    | Dstn   | 562    | 143741629 | 143741829 |
| 2 | 143858838 | 143899716 + | NM_001044750 | Banf2  | 31476  | 143890314 | 143890514 |
| 2 | 143858838 | 143899716 + | NM_001044750 | Banf2  | 40478  | 143899316 | 143899516 |
| 2 | 143858838 | 143899714 + | NM_207275    | Banf2  | 31476  | 143890314 | 143890514 |
| 2 | 143858838 | 143899714 + | NM_207275    | Banf2  | 40478  | 143899316 | 143899516 |
| 2 | 143998886 | 144015027 - | NM_001033778 | Gm5535 | -9039  | 144024066 | 144024266 |
| 2 | 143998886 | 144015027 - | NM_001033778 | Gm5535 | -9944  | 144024971 | 144025171 |
| 2 | 143998886 | 144015027 - | NM_001033778 | Gm5535 | 2498   | 144012329 | 144012529 |
| 2 | 143998886 | 144015027 - | NM_001033778 | Gm5535 | -7814  | 144022841 | 144023041 |
| 2 | 143998886 | 144015027 - | NM_001033778 | Gm5535 | 3207   | 144011620 | 144011820 |
| 2 | 144075859 | 144096639 - | NM_001199188 | Snx5   | 1909   | 144094530 | 144094730 |
| 2 | 144075859 | 144096639 - | NM_001199188 | Snx5   | 11157  | 144085282 | 144085482 |
| 2 | 144075859 | 144096639 - | NM_001199188 | Snx5   | 4360   | 144092079 | 144092279 |
| 2 | 144075859 | 144096309 - | NM_024225    | Snx5   | 1579   | 144094530 | 144094730 |
| 2 | 144075859 | 144096309 - | NM_024225    | Snx5   | 10827  | 144085282 | 144085482 |
| 2 | 144075859 | 144096309 - | NM_024225    | Snx5   | 4030   | 144092079 | 144092279 |

|   |           |             |              |               |        |           |           |
|---|-----------|-------------|--------------|---------------|--------|-----------|-----------|
| 2 | 144091718 | 144091939 - | NR_030762    | Snord17       | -2591  | 144094530 | 144094730 |
| 2 | 144091718 | 144091939 - | NR_030762    | Snord17       | -140   | 144092079 | 144092279 |
| 2 | 144096640 | 144106964 + | NM_001289630 | Mgme1         | -1910  | 144094530 | 144094730 |
| 2 | 144096640 | 144106964 + | NM_001289630 | Mgme1         | -4361  | 144092079 | 144092279 |
| 2 | 144096640 | 144106964 + | NM_001289631 | Mgme1         | -1910  | 144094530 | 144094730 |
| 2 | 144096640 | 144106964 + | NM_001289631 | Mgme1         | -4361  | 144092079 | 144092279 |
| 2 | 144096640 | 144106964 + | NM_028984    | Mgme1         | -1910  | 144094530 | 144094730 |
| 2 | 144096640 | 144106964 + | NM_028984    | Mgme1         | -4361  | 144092079 | 144092279 |
| 2 | 145068347 | 145467676 + | NM_053195    | Slc24a3       | 283095 | 145351442 | 145351642 |
| 2 | 145611852 | 145713353 + | NM_028724    | Rin2          | 36104  | 145647956 | 145648156 |
| 2 | 146067035 | 146337741 - | NM_001033348 | Ralgapa2      | 68341  | 146269200 | 146269400 |
| 2 | 146067035 | 146337741 - | NM_001033348 | Ralgapa2      | 13338  | 146324203 | 146324403 |
| 2 | 146067035 | 146337741 - | NM_001033348 | Ralgapa2      | 23313  | 146314228 | 146314428 |
| 2 | 146067035 | 146337741 - | NM_001033348 | Ralgapa2      | 264074 | 146073467 | 146073667 |
| 2 | 146368667 | 146371845 + | NR_040502    | 4933406D12Rik | -5165  | 146363302 | 146363502 |
| 2 | 146681625 | 146795826 + | NM_001033298 | Kiz           | 103422 | 146785047 | 146785247 |
| 2 | 148506856 | 148518686 + | NM_028986    | Gzf1          | 7727   | 148514583 | 148514783 |
| 2 | 150443847 | 150493977 - | NM_080575    | Acss1         | -260   | 150494237 | 150494437 |
| 2 | 150443847 | 150493977 - | NM_080575    | Acss1         | 2953   | 150490824 | 150491024 |
| 2 | 150443847 | 150493977 - | NM_080575    | Acss1         | 2082   | 150491695 | 150491895 |
| 2 | 150493230 | 150494669 + | NR_040331    | E130215H24Rik | 1007   | 150494237 | 150494437 |
| 2 | 150493230 | 150494669 + | NR_040331    | E130215H24Rik | -2206  | 150490824 | 150491024 |
| 2 | 150493230 | 150494669 + | NR_040331    | E130215H24Rik | -1335  | 150491695 | 150491895 |
| 2 | 150574817 | 150597411 + | NM_172117    | Entpd6        | -74    | 150574543 | 150574743 |
| 2 | 150574817 | 150597411 + | NM_172117    | Entpd6        | -3604  | 150571013 | 150571213 |
| 2 | 150658251 | 150730468 - | NM_024465    | Abhd12        | 4245   | 150726023 | 150726223 |
| 2 | 150658251 | 150730468 - | NM_024465    | Abhd12        | -1379  | 150731847 | 150732047 |
| 2 | 150658251 | 150730468 - | NM_024465    | Abhd12        | 50459  | 150679809 | 150680009 |
| 2 | 150735330 | 150751807 + | NM_001163476 | Gins1         | -9107  | 150726023 | 150726223 |
| 2 | 150735330 | 150751807 + | NM_001163476 | Gins1         | 9241   | 150744571 | 150744771 |

|   |           |             |              |         |       |           |           |
|---|-----------|-------------|--------------|---------|-------|-----------|-----------|
| 2 | 150735330 | 150751807 + | NM_001163476 | Gins1   | -3283 | 150731847 | 150732047 |
| 2 | 150735330 | 150757017 + | NM_027014    | Gins1   | 17476 | 150752806 | 150753006 |
| 2 | 150735330 | 150757017 + | NM_027014    | Gins1   | -9107 | 150726023 | 150726223 |
| 2 | 150735330 | 150757017 + | NM_027014    | Gins1   | 9241  | 150744571 | 150744771 |
| 2 | 150735330 | 150757017 + | NM_027014    | Gins1   | 16617 | 150751947 | 150752147 |
| 2 | 150735330 | 150757017 + | NM_027014    | Gins1   | -3283 | 150731847 | 150732047 |
| 2 | 151398359 | 151415742 + | NM_145535    | Sdcbp2  | 6836  | 151405195 | 151405395 |
| 2 | 151398359 | 151415742 + | NM_145535    | Sdcbp2  | -46   | 151398113 | 151398313 |
| 2 | 151416285 | 151458330 - | NM_001291076 | Snph    | 30035 | 151428095 | 151428295 |
| 2 | 151416285 | 151458330 - | NM_001291077 | Snph    | 30035 | 151428095 | 151428295 |
| 2 | 151416285 | 151458330 - | NM_198214    | Snph    | 30035 | 151428095 | 151428295 |
| 2 | 151541798 | 151567047 - | NM_001305244 | Psmf1   | 0     | 151567021 | 151567221 |
| 2 | 151541798 | 151567047 - | NM_212446    | Psmf1   | 0     | 151567021 | 151567221 |
| 2 | 151737068 | 151770391 + | NM_009641    | Angpt4  | 15884 | 151752952 | 151753152 |
| 2 | 151907265 | 151921539 + | NM_001160410 | Scrt2   | 7592  | 151914857 | 151915057 |
| 2 | 151931260 | 151937113 + | NM_029688    | Srxn1   | 3848  | 151935108 | 151935308 |
| 2 | 152052576 | 152107588 + | NM_007788    | Csnk2a1 | 24615 | 152077191 | 152077391 |
| 2 | 152119608 | 152138327 + | NM_024196    | Tbc1d20 | -303  | 152119105 | 152119305 |
| 2 | 152142070 | 152158162 - | NM_001083921 | Rbck1   | -5902 | 152164064 | 152164264 |
| 2 | 152142070 | 152158376 - | NM_019705    | Rbck1   | -5688 | 152164064 | 152164264 |
| 2 | 152163161 | 152169797 - | NM_175093    | Trib3   | 5533  | 152164064 | 152164264 |
| 2 | 152171405 | 152201059 + | NR_033505    | Gm14164 | 14124 | 152185529 | 152185729 |
| 2 | 152171405 | 152201059 + | NR_033505    | Gm14164 | -7141 | 152164064 | 152164264 |
| 2 | 152495197 | 152534405 + | NM_001159551 | H13     | 37477 | 152532674 | 152532874 |
| 2 | 152495197 | 152534405 + | NM_010376    | H13     | 37477 | 152532674 | 152532874 |
| 2 | 152561987 | 152563147 + | NM_010495    | Id1     | 567   | 152562554 | 152562754 |
| 2 | 152584468 | 152656454 - | NM_001289739 | Bcl2l1  | 19244 | 152637010 | 152637210 |
| 2 | 152584468 | 152656454 - | NM_001289739 | Bcl2l1  | 5605  | 152650649 | 152650849 |
| 2 | 152606400 | 152656454 - | NM_001289716 | Bcl2l1  | 19244 | 152637010 | 152637210 |
| 2 | 152606400 | 152656454 - | NM_001289716 | Bcl2l1  | 5605  | 152650649 | 152650849 |



|   |           |             |              |               |        |           |           |
|---|-----------|-------------|--------------|---------------|--------|-----------|-----------|
| 2 | 152606400 | 152656454 - | NM_001289717 | Bcl2l1        | 19244  | 152637010 | 152637210 |
| 2 | 152606400 | 152656454 - | NM_001289717 | Bcl2l1        | 5605   | 152650649 | 152650849 |
| 2 | 152606400 | 152657465 - | NM_009743    | Bcl2l1        | 20255  | 152637010 | 152637210 |
| 2 | 152606400 | 152657465 - | NM_009743    | Bcl2l1        | 6616   | 152650649 | 152650849 |
| 2 | 152788221 | 152834219 + | NM_001083618 | Ttll9         | 0      | 152788082 | 152788282 |
| 2 | 152788221 | 152828941 + | NM_029064    | Ttll9         | 0      | 152788082 | 152788282 |
| 2 | 152891691 | 152907472 + | NM_145536    | Ccm2l         | 15328  | 152907019 | 152907219 |
| 2 | 152987037 | 153036200 + | NM_133847    | Tm9sf4        | 25081  | 153012118 | 153012318 |
| 2 | 153048106 | 153051178 - | NM_198617    | Tspyl3        | -483   | 153051661 | 153051861 |
| 2 | 153053505 | 153067095 - | NM_018807    | Plagl2        | -8530  | 153075625 | 153075825 |
| 2 | 153067268 | 153095986 + | NM_080463    | Pofut1        | 8357   | 153075625 | 153075825 |
| 2 | 153067268 | 153095986 + | NM_080463    | Pofut1        | 17912  | 153085180 | 153085380 |
| 2 | 153166893 | 153171547 - | NR_040318    | 2500004C02Rik | -1613  | 153173160 | 153173360 |
| 2 | 153171875 | 153229744 + | NM_001039939 | Asxl1         | 1285   | 153173160 | 153173360 |
| 2 | 153233197 | 153270216 - | NM_001001986 | Nol4l         | 1367   | 153268649 | 153268849 |
| 2 | 153233197 | 153270216 - | NM_001001986 | Nol4l         | 18748  | 153251268 | 153251468 |
| 2 | 153233197 | 153355708 - | NM_001134300 | Nol4l         | 86859  | 153268649 | 153268849 |
| 2 | 153233197 | 153355708 - | NM_001134300 | Nol4l         | 3969   | 153351539 | 153351739 |
| 2 | 153233197 | 153355708 - | NM_001134300 | Nol4l         | 104240 | 153251268 | 153251468 |
| 2 | 153567023 | 153599051 + | NM_007896    | Mapre1        | 4332   | 153571355 | 153571555 |
| 2 | 153700781 | 153721007 + | NM_025631    | Bpifb2        | 17837  | 153718618 | 153718818 |
| 2 | 153726124 | 153738530 + | NM_199303    | Bpifb6        | -7306  | 153718618 | 153718818 |
| 2 | 154262220 | 154365093 + | NM_001285446 | Cbfa2t2       | 71641  | 154333861 | 154334061 |
| 2 | 154262220 | 154365093 + | NM_009823    | Cbfa2t2       | 71641  | 154333861 | 154334061 |
| 2 | 154262220 | 154365093 + | NM_172860    | Cbfa2t2       | 71641  | 154333861 | 154334061 |
| 2 | 154439104 | 154472554 + | NM_199304    | Zfp341        | 21012  | 154460116 | 154460316 |
| 2 | 154616846 | 154692998 + | NM_001139511 | Raly          | 1268   | 154618114 | 154618314 |
| 2 | 154616846 | 154692998 + | NM_001139511 | Raly          | 64326  | 154681172 | 154681372 |
| 2 | 154616846 | 154692998 + | NM_001139512 | Raly          | 1268   | 154618114 | 154618314 |
| 2 | 154616846 | 154692998 + | NM_001139512 | Raly          | 64326  | 154681172 | 154681372 |

|   |           |             |              |               |        |           |           |
|---|-----------|-------------|--------------|---------------|--------|-----------|-----------|
| 2 | 154616846 | 154692998 + | NM_001139513 | Raly          | 1268   | 154618114 | 154618314 |
| 2 | 154616846 | 154692998 + | NM_001139513 | Raly          | 64326  | 154681172 | 154681372 |
| 2 | 154616846 | 154692998 + | NM_023130    | Raly          | 1268   | 154618114 | 154618314 |
| 2 | 154616846 | 154692998 + | NM_023130    | Raly          | 64326  | 154681172 | 154681372 |
| 2 | 155343779 | 155388480 + | NM_019811    | Acss2         | 29594  | 155373373 | 155373573 |
| 2 | 155372776 | 155382667 - | NR_040613    | Acss2os       | 9094   | 155373373 | 155373573 |
| 2 | 155643468 | 155644940 - | NR_015528    | BC029722      | -841   | 155645781 | 155645981 |
| 2 | 155645573 | 155652662 - | NM_010579    | Eif6          | 6681   | 155645781 | 155645981 |
| 2 | 155782294 | 155824637 + | NM_001129999 | Cep250        | 33181  | 155815475 | 155815675 |
| 2 | 155782294 | 155824637 + | NM_001130000 | Cep250        | 33181  | 155815475 | 155815675 |
| 2 | 155782294 | 155824637 + | NM_008383    | Cep250        | 33181  | 155815475 | 155815675 |
| 2 | 155782294 | 155824637 + | NM_177217    | Cep250        | 33181  | 155815475 | 155815675 |
| 2 | 155972976 | 156005975 - | NM_001291114 | Rbm39         | 17522  | 155988253 | 155988453 |
| 2 | 155972976 | 156005317 - | NM_001291115 | Rbm39         | 16864  | 155988253 | 155988453 |
| 2 | 155972976 | 156005975 - | NM_133242    | Rbm39         | 17522  | 155988253 | 155988453 |
| 2 | 156022383 | 156135690 + | NM_172674    | Phf20         | -242   | 156021941 | 156022141 |
| 2 | 156022383 | 156135690 + | NM_172674    | Phf20         | 109302 | 156131685 | 156131885 |
| 2 | 156137582 | 156138441 - | NM_020255    | Scand1        | 0      | 156138325 | 156138525 |
| 2 | 156138209 | 156201375 + | NM_027585    | Cnbd2         | 116    | 156138325 | 156138525 |
| 2 | 156138209 | 156201375 + | NM_027585    | Cnbd2         | -6324  | 156131685 | 156131885 |
| 2 | 156439433 | 156590100 + | NM_001277186 | Dlgap4        | 113302 | 156552735 | 156552935 |
| 2 | 156439433 | 156590100 + | NM_001277187 | Dlgap4        | 113302 | 156552735 | 156552935 |
| 2 | 156439433 | 156590100 + | NM_146128    | Dlgap4        | 113302 | 156552735 | 156552935 |
| 2 | 156540275 | 156546646 - | NR_040505    | 4930405A21Rik | -6089  | 156552735 | 156552935 |
| 2 | 156546701 | 156590100 + | NM_001042488 | Dlgap4        | 6034   | 156552735 | 156552935 |
| 2 | 156547015 | 156590100 + | NM_001042487 | Dlgap4        | 5720   | 156552735 | 156552935 |
| 2 | 156601200 | 156607394 + | NM_172118    | Myl9          | 3198   | 156604398 | 156604598 |
| 2 | 156601200 | 156607394 + | NM_172118    | Myl9          | 4201   | 156605401 | 156605601 |
| 2 | 156601200 | 156607394 + | NM_172118    | Myl9          | 3619   | 156604819 | 156605019 |
| 2 | 156753078 | 156817848 - | NM_013865    | Ndrg3         | 724    | 156816924 | 156817124 |

|   |           |             |              |               |       |           |           |
|---|-----------|-------------|--------------|---------------|-------|-----------|-----------|
| 2 | 156753078 | 156817848 - | NM_180956    | Ndrg3         | 724   | 156816924 | 156817124 |
| 2 | 156923265 | 156960959 - | NM_001139520 | Samhd1        | 9629  | 156951130 | 156951330 |
| 2 | 156923265 | 156960959 - | NM_001139520 | Samhd1        | 7685  | 156953074 | 156953274 |
| 2 | 156923265 | 156960959 - | NM_018851    | Samhd1        | 9629  | 156951130 | 156951330 |
| 2 | 156923265 | 156960959 - | NM_018851    | Samhd1        | 7685  | 156953074 | 156953274 |
| 2 | 156971630 | 157030271 - | NM_011249    | Rbl1          | 19231 | 157010840 | 157011040 |
| 2 | 157000732 | 157030271 - | NM_001139516 | Rbl1          | 19231 | 157010840 | 157011040 |
| 2 | 157034284 | 157105286 - | NM_001039557 | Mroh8         | 34132 | 157070954 | 157071154 |
| 2 | 157193330 | 157222500 + | NM_026968    | Manbal        | -5423 | 157187707 | 157187907 |
| 2 | 157250029 | 157297575 + | NM_001025395 | Src           | -1031 | 157248798 | 157248998 |
| 2 | 157250029 | 157297575 + | NM_001025395 | Src           | 1381  | 157251410 | 157251610 |
| 2 | 157250029 | 157297575 + | NM_009271    | Src           | -1031 | 157248798 | 157248998 |
| 2 | 157250029 | 157297575 + | NM_009271    | Src           | 1381  | 157251410 | 157251610 |
| 2 | 157382098 | 157392098 - | NM_016916    | Blcap         | 3040  | 157388858 | 157389058 |
| 2 | 157740389 | 157770456 + | NM_198627    | Vstm2l        | 21231 | 157761620 | 157761820 |
| 2 | 157854233 | 157903944 + | NM_001291134 | Rprd1b        | 43011 | 157897244 | 157897444 |
| 2 | 157854233 | 157903944 + | NM_001291135 | Rprd1b        | 43011 | 157897244 | 157897444 |
| 2 | 157854233 | 157903944 + | NM_001291136 | Rprd1b        | 43011 | 157897244 | 157897444 |
| 2 | 157854233 | 157903944 + | NM_027434    | Rprd1b        | 43011 | 157897244 | 157897444 |
| 2 | 157896100 | 157917534 - | NR_040609    | 2010009K17Rik | 11019 | 157906315 | 157906515 |
| 2 | 157896100 | 157917534 - | NR_040609    | 2010009K17Rik | 20090 | 157897244 | 157897444 |
| 2 | 158235589 | 158324990 + | NM_001291137 | Ralgapb       | -360  | 158235029 | 158235229 |
| 2 | 158235589 | 158324990 + | NM_001291138 | Ralgapb       | -360  | 158235029 | 158235229 |
| 2 | 158593835 | 158612374 + | NM_027975    | Fam83d        | 9497  | 158603332 | 158603532 |
| 2 | 158593835 | 158612374 + | NM_027975    | Fam83d        | 1604  | 158595439 | 158595639 |
| 2 | 160137137 | 160153231 - | NM_001033411 | Gm826         | -5097 | 160158328 | 160158528 |
| 2 | 160137137 | 160153231 - | NM_001033411 | Gm826         | 2145  | 160150886 | 160151086 |
| 2 | 160471633 | 160548500 + | NM_009408    | Top1          | 45404 | 160517037 | 160517237 |
| 2 | 160557046 | 160601497 + | NM_021280    | Plcg1         | -1279 | 160555567 | 160555767 |
| 2 | 160557046 | 160601497 + | NM_021280    | Plcg1         | -5236 | 160551610 | 160551810 |

|   |           |             |              |               |         |           |           |
|---|-----------|-------------|--------------|---------------|---------|-----------|-----------|
| 2 | 160706406 | 160731737 + | NM_022883    | Lpin3         | 11355   | 160717761 | 160717961 |
| 2 | 160706406 | 160731737 + | NM_022883    | Lpin3         | 9700    | 160716106 | 160716306 |
| 2 | 160713904 | 160731737 + | NM_001199118 | Lpin3         | 3857    | 160717761 | 160717961 |
| 2 | 160713904 | 160731737 + | NM_001199118 | Lpin3         | 2202    | 160716106 | 160716306 |
| 2 | 161347724 | 162486884 - | NM_001291149 | Ptprt         | 1004283 | 161482401 | 161482601 |
| 2 | 161347724 | 162486884 - | NM_001291149 | Ptprt         | 470830  | 162015854 | 162016054 |
| 2 | 161347724 | 162486884 - | NM_001291150 | Ptprt         | 1004283 | 161482401 | 161482601 |
| 2 | 161347724 | 162486884 - | NM_001291150 | Ptprt         | 470830  | 162015854 | 162016054 |
| 2 | 161347724 | 162486884 - | NM_001291151 | Ptprt         | 1004283 | 161482401 | 161482601 |
| 2 | 161347724 | 162486884 - | NM_001291151 | Ptprt         | 470830  | 162015854 | 162016054 |
| 2 | 161347724 | 162486884 - | NM_021464    | Ptprt         | 1004283 | 161482401 | 161482601 |
| 2 | 161347724 | 162486884 - | NM_021464    | Ptprt         | 470830  | 162015854 | 162016054 |
| 2 | 163298281 | 163298740 + | NR_028122    | 2310001K24Rik | -9161   | 163288920 | 163289120 |
| 2 | 163319540 | 163367458 - | NR_027970    | Hnf4aos       | 34832   | 163332426 | 163332626 |
| 2 | 163319540 | 163367458 - | NR_027970    | Hnf4aos       | 9580    | 163357678 | 163357878 |
| 2 | 163319540 | 163367458 - | NR_027970    | Hnf4aos       | 34127   | 163333131 | 163333331 |
| 2 | 163372924 | 163398644 + | NM_008261    | Hnf4a         | 5586    | 163378510 | 163378710 |
| 2 | 163428050 | 163444750 + | NM_029512    | Ttpal         | -8682   | 163419168 | 163419368 |
| 2 | 163428050 | 163444750 + | NM_029512    | Ttpal         | 7330    | 163435380 | 163435580 |
| 2 | 163428050 | 163444750 + | NM_181734    | Ttpal         | -8682   | 163419168 | 163419368 |
| 2 | 163428050 | 163444750 + | NM_181734    | Ttpal         | 7330    | 163435380 | 163435580 |
| 2 | 163428050 | 163444750 + | NR_131225    | Ttpal         | -8682   | 163419168 | 163419368 |
| 2 | 163428050 | 163444750 + | NR_131225    | Ttpal         | 7330    | 163435380 | 163435580 |
| 2 | 163432948 | 163444750 + | NM_001305803 | Ttpal         | 2432    | 163435380 | 163435580 |
| 2 | 163449009 | 163470880 - | NM_012032    | Serinc3       | 7213    | 163463467 | 163463667 |
| 2 | 163449009 | 163470880 - | NM_012032    | Serinc3       | 2145    | 163468535 | 163468735 |
| 2 | 163470586 | 163471537 + | NR_028113    | 0610039K10Rik | -6919   | 163463467 | 163463667 |
| 2 | 163470586 | 163471537 + | NR_028113    | 0610039K10Rik | -1851   | 163468535 | 163468735 |
| 2 | 163484122 | 163551895 + | NM_001039390 | Pkig          | 24024   | 163508146 | 163508346 |
| 2 | 163484122 | 163551895 + | NM_001039390 | Pkig          | 60800   | 163544922 | 163545122 |

|   |           |             |              |         |       |           |           |
|---|-----------|-------------|--------------|---------|-------|-----------|-----------|
| 2 | 163484122 | 163551895 + | NM_001039390 | Pkig    | 2012  | 163486134 | 163486334 |
| 2 | 163484122 | 163551895 + | NM_001039391 | Pkig    | 24024 | 163508146 | 163508346 |
| 2 | 163484122 | 163551895 + | NM_001039391 | Pkig    | 60800 | 163544922 | 163545122 |
| 2 | 163484122 | 163551895 + | NM_001039391 | Pkig    | 2012  | 163486134 | 163486334 |
| 2 | 163484122 | 163551895 + | NM_001164055 | Pkig    | 24024 | 163508146 | 163508346 |
| 2 | 163484122 | 163551895 + | NM_001164055 | Pkig    | 60800 | 163544922 | 163545122 |
| 2 | 163484122 | 163551895 + | NM_001164055 | Pkig    | 2012  | 163486134 | 163486334 |
| 2 | 163484122 | 163551895 + | NM_001277096 | Pkig    | 24024 | 163508146 | 163508346 |
| 2 | 163484122 | 163551895 + | NM_001277096 | Pkig    | 60800 | 163544922 | 163545122 |
| 2 | 163484122 | 163551895 + | NM_001277096 | Pkig    | 2012  | 163486134 | 163486334 |
| 2 | 163484194 | 163551895 + | NM_001164053 | Pkig    | 23952 | 163508146 | 163508346 |
| 2 | 163484194 | 163551895 + | NM_001164053 | Pkig    | 60728 | 163544922 | 163545122 |
| 2 | 163484194 | 163551895 + | NM_001164053 | Pkig    | 1940  | 163486134 | 163486334 |
| 2 | 163519773 | 163551895 + | NM_011106    | Pkig    | 25149 | 163544922 | 163545122 |
| 2 | 164249747 | 164268689 - | NM_011521    | Sdc4    | 8255  | 164260234 | 164260434 |
| 2 | 164249747 | 164268689 - | NM_011521    | Sdc4    | 9438  | 164259051 | 164259251 |
| 2 | 164825857 | 164860280 - | NM_144892    | Ncoa5   | 24210 | 164835870 | 164836070 |
| 2 | 164825857 | 164860280 - | NM_144892    | Ncoa5   | 24453 | 164835627 | 164835827 |
| 2 | 165102022 | 165113288 - | NM_001252573 | Slc35c2 | 3082  | 165110006 | 165110206 |
| 2 | 165102022 | 165113288 - | NM_001252574 | Slc35c2 | 3082  | 165110006 | 165110206 |
| 2 | 165102022 | 165113339 - | NM_001252575 | Slc35c2 | 3133  | 165110006 | 165110206 |
| 2 | 165102022 | 165113339 - | NM_144893    | Slc35c2 | 3133  | 165110006 | 165110206 |
| 2 | 165102022 | 165113339 - | NR_045544    | Slc35c2 | 3133  | 165110006 | 165110206 |
| 2 | 165113531 | 165146327 - | NM_001302752 | Elmo2   | -929  | 165147256 | 165147456 |
| 2 | 165113531 | 165141852 - | NM_001302754 | Elmo2   | -5404 | 165147256 | 165147456 |
| 2 | 165113531 | 165151980 - | NM_080287    | Elmo2   | 4524  | 165147256 | 165147456 |
| 2 | 165113531 | 165151980 - | NM_080287    | Elmo2   | -5241 | 165157221 | 165157421 |
| 2 | 165113531 | 165151980 - | NM_207706    | Elmo2   | 4524  | 165147256 | 165147456 |
| 2 | 165113531 | 165151980 - | NM_207706    | Elmo2   | -5241 | 165157221 | 165157421 |
| 2 | 165176797 | 165187620 - | NM_001005425 | Zfp663  | -4939 | 165192559 | 165192759 |

|   |           |             |              |          |        |           |           |
|---|-----------|-------------|--------------|----------|--------|-----------|-----------|
| 2 | 165315612 | 165318815 - | NM_001007581 | Trp53rka | -4387  | 165323202 | 165323402 |
| 2 | 165329397 | 165345418 + | NM_130451    | Slc2a10  | -5995  | 165323202 | 165323402 |
| 2 | 165818137 | 165898743 + | NM_008679    | Ncoa3    | 49967  | 165868104 | 165868304 |
| 2 | 165818137 | 165898743 + | NM_008679    | Ncoa3    | 50452  | 165868589 | 165868789 |
| 2 | 165818137 | 165898743 + | NM_008679    | Ncoa3    | 19586  | 165837723 | 165837923 |
| 2 | 165818137 | 165898743 + | NM_008679    | Ncoa3    | 39814  | 165857951 | 165858151 |
| 2 | 165899399 | 165980786 - | NM_001252578 | Sulf2    | 19213  | 165961373 | 165961573 |
| 2 | 165899399 | 165980786 - | NM_001252578 | Sulf2    | 6873   | 165973713 | 165973913 |
| 2 | 165899399 | 165980786 - | NM_001252578 | Sulf2    | 2149   | 165978437 | 165978637 |
| 2 | 165899399 | 165980786 - | NM_001252578 | Sulf2    | 14102  | 165966484 | 165966684 |
| 2 | 165899399 | 165980786 - | NM_001252578 | Sulf2    | 32202  | 165948384 | 165948584 |
| 2 | 165899399 | 165980786 - | NM_001252578 | Sulf2    | 29991  | 165950595 | 165950795 |
| 2 | 165899399 | 165981184 - | NM_001252579 | Sulf2    | 19611  | 165961373 | 165961573 |
| 2 | 165899399 | 165981184 - | NM_001252579 | Sulf2    | 7271   | 165973713 | 165973913 |
| 2 | 165899399 | 165981184 - | NM_001252579 | Sulf2    | 2547   | 165978437 | 165978637 |
| 2 | 165899399 | 165981184 - | NM_001252579 | Sulf2    | 14500  | 165966484 | 165966684 |
| 2 | 165899399 | 165981184 - | NM_001252579 | Sulf2    | 32600  | 165948384 | 165948584 |
| 2 | 165899399 | 165981184 - | NM_001252579 | Sulf2    | 30389  | 165950595 | 165950795 |
| 2 | 165899399 | 165981184 - | NM_028072    | Sulf2    | 19611  | 165961373 | 165961573 |
| 2 | 165899399 | 165981184 - | NM_028072    | Sulf2    | 7271   | 165973713 | 165973913 |
| 2 | 165899399 | 165981184 - | NM_028072    | Sulf2    | 2547   | 165978437 | 165978637 |
| 2 | 165899399 | 165981184 - | NM_028072    | Sulf2    | 14500  | 165966484 | 165966684 |
| 2 | 165899399 | 165981184 - | NM_028072    | Sulf2    | 32600  | 165948384 | 165948584 |
| 2 | 165899399 | 165981184 - | NM_028072    | Sulf2    | 30389  | 165950595 | 165950795 |
| 2 | 166391845 | 166539333 - | NM_177782    | Prex1    | -969   | 166540302 | 166540502 |
| 2 | 166391845 | 166539333 - | NM_177782    | Prex1    | 121771 | 166417362 | 166417562 |
| 2 | 166498218 | 166547653 + | NR_105783    | Mir6364  | 42084  | 166540302 | 166540502 |
| 2 | 166619267 | 166624993 + | NM_023815    | Trp53rkb | -2669  | 166616398 | 166616598 |
| 2 | 166631081 | 166723552 + | NM_001085495 | Arfgef2  | 16690  | 166647771 | 166647971 |
| 2 | 166773049 | 166821800 - | NM_001109905 | Stau1    | 668    | 166820932 | 166821132 |

|   |           |             |              |               |       |           |           |
|---|-----------|-------------|--------------|---------------|-------|-----------|-----------|
| 2 | 166773049 | 166821800 - | NM_001109906 | Stau1         | 668   | 166820932 | 166821132 |
| 2 | 166773049 | 166821800 - | NM_001291160 | Stau1         | 668   | 166820932 | 166821132 |
| 2 | 166773049 | 166821800 - | NM_011490    | Stau1         | 668   | 166820932 | 166821132 |
| 2 | 166861297 | 166888516 - | NM_001033196 | Znfx1         | 2650  | 166885666 | 166885866 |
| 2 | 166888434 | 166891363 + | NM_001081005 | 1500012F01Rik | -2568 | 166885666 | 166885866 |
| 2 | 166890793 | 166890859 + | NR_028540    | Snord12       | -4927 | 166885666 | 166885866 |
| 2 | 167123945 | 167174679 - | NM_019835    | B4galt5       | 3258  | 167171221 | 167171421 |
| 2 | 167123945 | 167174679 - | NM_019835    | B4galt5       | 4284  | 167170195 | 167170395 |
| 2 | 167247210 | 167302501 + | NM_001304540 | Slc9a8        | -4900 | 167242110 | 167242310 |
| 2 | 167247210 | 167302501 + | NM_001304542 | Slc9a8        | -4900 | 167242110 | 167242310 |
| 2 | 167247210 | 167302501 + | NM_148929    | Slc9a8        | -4900 | 167242110 | 167242310 |
| 2 | 167247210 | 167302501 + | NR_130767    | Slc9a8        | -4900 | 167242110 | 167242310 |
| 2 | 167306636 | 167318375 - | NM_170756    | Spata2        | 6715  | 167311460 | 167311660 |
| 2 | 167318145 | 167341667 + | NM_030743    | Rnf114        | -6485 | 167311460 | 167311660 |
| 2 | 167433139 | 167457506 - | NM_001311131 | Ube2v1        | -2630 | 167460136 | 167460336 |
| 2 | 167433139 | 167457506 - | NM_001311146 | Ube2v1        | -2630 | 167460136 | 167460336 |
| 2 | 167433139 | 167457506 - | NM_023230    | Ube2v1        | -2630 | 167460136 | 167460336 |
| 2 | 167468725 | 167487045 - | NM_145538    | Tmem189       | 8487  | 167478358 | 167478558 |
| 2 | 167514415 | 167515933 + | NM_001287738 | Cebpb         | 2979  | 167517394 | 167517594 |
| 2 | 167514415 | 167515933 + | NM_001287738 | Cebpb         | -936  | 167513279 | 167513479 |
| 2 | 167514415 | 167515933 + | NM_001287739 | Cebpb         | 2979  | 167517394 | 167517594 |
| 2 | 167514415 | 167515933 + | NM_001287739 | Cebpb         | -936  | 167513279 | 167513479 |
| 2 | 167514415 | 167515933 + | NM_009883    | Cebpb         | 2979  | 167517394 | 167517594 |
| 2 | 167514415 | 167515933 + | NM_009883    | Cebpb         | -936  | 167513279 | 167513479 |
| 2 | 167516259 | 167522914 + | NR_110334    | A530013C23Rik | 1135  | 167517394 | 167517594 |
| 2 | 167516259 | 167522914 + | NR_110334    | A530013C23Rik | -2780 | 167513279 | 167513479 |
| 2 | 167516677 | 167522914 + | NR_015500    | A530013C23Rik | 717   | 167517394 | 167517594 |
| 2 | 167516677 | 167522914 + | NR_015500    | A530013C23Rik | -3198 | 167513279 | 167513479 |
| 2 | 167906504 | 167926704 + | NM_021409    | Pard6b        | 4570  | 167911074 | 167911274 |
| 2 | 167906504 | 167926704 + | NM_021409    | Pard6b        | -2190 | 167904114 | 167904314 |

|   |           |             |              |          |        |           |           |
|---|-----------|-------------|--------------|----------|--------|-----------|-----------|
| 2 | 169459146 | 169714005 + | NM_080455    | Tshz2    | 132784 | 169591930 | 169592130 |
| 2 | 169934143 | 169956721 - | NM_001033299 | Zfp217   | -798   | 169957519 | 169957719 |
| 2 | 169934143 | 169956721 - | NM_001033299 | Zfp217   | 4570   | 169951951 | 169952151 |
| 2 | 169934143 | 169968176 - | NM_001159683 | Zfp217   | 10457  | 169957519 | 169957719 |
| 2 | 169934143 | 169968176 - | NM_001159683 | Zfp217   | 16025  | 169951951 | 169952151 |
| 2 | 170172491 | 170253346 - | NM_001164369 | Bcas1    | 66212  | 170186934 | 170187134 |
| 2 | 170172491 | 170253346 - | NM_029815    | Bcas1    | 66212  | 170186934 | 170187134 |
| 2 | 170181861 | 170205936 + | NR_040610    | Bcas1os2 | 5073   | 170186934 | 170187134 |
| 2 | 172847403 | 172860233 + | NM_019547    | Rbm38    | 5966   | 172853369 | 172853569 |
| 2 | 172978574 | 172984755 + | NM_011044    | Pck1     | -479   | 172977895 | 172978095 |
| 2 | 172978574 | 172984755 + | NM_011044    | Pck1     | -88    | 172978286 | 172978486 |
| 2 | 173049966 | 173102035 - | NM_022995    | Pmepa1   | 46666  | 173055169 | 173055369 |
| 2 | 173049966 | 173102035 - | NM_022995    | Pmepa1   | 9956   | 173091879 | 173092079 |
| 2 | 173563072 | 173609838 + | NM_019806    | Vapb     | -8727  | 173554145 | 173554345 |
| 2 | 173950539 | 174009420 - | NR_040530    | Gm10714  | 51135  | 173958085 | 173958285 |
| 2 | 174286576 | 174289603 - | NM_025983    | Atp5e    | -8118  | 174297721 | 174297921 |
| 2 | 174290592 | 174298443 - | NM_025531    | Slmo2    | 522    | 174297721 | 174297921 |
| 2 | 174469035 | 174536332 + | NM_001099328 | Zfp831   | 16884  | 174485919 | 174486119 |
| 2 | 174586259 | 174609544 + | NM_007903    | Edn3     | -1240  | 174584819 | 174585019 |
| 2 | 175594789 | 176850108 - | NR_040256.1  | Gm14405  | -8019  | 176858127 | 176858327 |
| 2 | 177282931 | 177297017 + | NR_036450    | Gm14403  | 2306   | 177285237 | 177285437 |
| 2 | 179854071 | 179897386 + | NM_144500    | Osbpl2   | -2779  | 179851092 | 179851292 |
| 2 | 179993244 | 180008171 - | NM_145851    | Cables2  | -3600  | 180011771 | 180011971 |
| 2 | 180059793 | 180069385 - | NM_008093    | Gata5    | 5225   | 180063960 | 180064160 |
| 2 | 180059793 | 180069385 - | NM_008093    | Gata5    | -752   | 180070137 | 180070337 |
| 2 | 180067562 | 180075438 + | NR_045877    | Gata5os  | -3402  | 180063960 | 180064160 |
| 2 | 180067562 | 180075438 + | NR_045877    | Gata5os  | 2575   | 180070137 | 180070337 |
| 2 | 180669477 | 180689405 - | NM_001141933 | Nkain4   | -8343  | 180697748 | 180697948 |
| 2 | 180669477 | 180689405 - | NM_001141933 | Nkain4   | -9381  | 180698786 | 180698986 |
| 2 | 180669477 | 180689405 - | NM_021426    | Nkain4   | -8343  | 180697748 | 180697948 |



|   |           |             |              |         |        |           |           |
|---|-----------|-------------|--------------|---------|--------|-----------|-----------|
| 2 | 180669477 | 180689405 - | NM_021426    | Nkain4  | -9381  | 180698786 | 180698986 |
| 2 | 180701930 | 180717230 + | NM_001177707 | Arfgap1 | -3982  | 180697748 | 180697948 |
| 2 | 180701930 | 180717230 + | NM_001177707 | Arfgap1 | -2944  | 180698786 | 180698986 |
| 2 | 180701930 | 180717230 + | NM_001177708 | Arfgap1 | -3982  | 180697748 | 180697948 |
| 2 | 180701930 | 180717230 + | NM_001177708 | Arfgap1 | -2944  | 180698786 | 180698986 |
| 2 | 180701930 | 180717230 + | NM_001177709 | Arfgap1 | -3982  | 180697748 | 180697948 |
| 2 | 180701930 | 180717230 + | NM_001177709 | Arfgap1 | -2944  | 180698786 | 180698986 |
| 2 | 180701930 | 180717230 + | NM_001177710 | Arfgap1 | -3982  | 180697748 | 180697948 |
| 2 | 180701930 | 180717230 + | NM_001177710 | Arfgap1 | -2944  | 180698786 | 180698986 |
| 2 | 180701930 | 180717230 + | NM_145760    | Arfgap1 | -3982  | 180697748 | 180697948 |
| 2 | 180701930 | 180717230 + | NM_145760    | Arfgap1 | -2944  | 180698786 | 180698986 |
| 2 | 180702005 | 180717230 + | NM_001177706 | Arfgap1 | -4057  | 180697748 | 180697948 |
| 2 | 180702005 | 180717230 + | NM_001177706 | Arfgap1 | -3019  | 180698786 | 180698986 |
| 2 | 180882397 | 180891721 - | NM_007906    | Eef1a2  | -8863  | 180900584 | 180900784 |
| 2 | 180922048 | 180923210 + | NM_025598    | Pdpf    | -485   | 180921363 | 180921563 |
| 2 | 180929829 | 180937495 - | NM_009184    | Ptk6    | -3526  | 180941021 | 180941221 |
| 2 | 180929829 | 180937495 - | NM_009184    | Ptk6    | 5761   | 180931534 | 180931734 |
| 2 | 180929829 | 180937495 - | NM_009184    | Ptk6    | 0      | 180937325 | 180937525 |
| 2 | 180940268 | 180947877 - | NM_011481    | Srms    | 6656   | 180941021 | 180941221 |
| 2 | 180962320 | 180976733 - | NM_183162    | Helz2   | -7328  | 180984061 | 180984261 |
| 2 | 181145252 | 181194132 - | NM_028125    | Zbtb46  | 1206   | 181192726 | 181192926 |
| 2 | 181227911 | 181229686 + | NM_183181    | Abhd16b | -9786  | 181217925 | 181218125 |
| 2 | 181336024 | 181390367 + | NM_133701    | Prpf6   | 45512  | 181381536 | 181381736 |
| 2 | 181336024 | 181390367 + | NM_133701    | Prpf6   | 52212  | 181388236 | 181388436 |
| 3 | 3508030   | 3659801 +   | NM_013920    | Hnf4g   | 119173 | 3627203   | 3627403   |
| 3 | 3508030   | 3659801 +   | NM_013920    | Hnf4g   | 137677 | 3645707   | 3645907   |
| 3 | 3508030   | 3659801 +   | NM_013920    | Hnf4g   | 125875 | 3633905   | 3634105   |
| 3 | 3508030   | 3659801 +   | NM_013920    | Hnf4g   | -4231  | 3503599   | 3503799   |
| 3 | 3508030   | 3659801 +   | NM_013920    | Hnf4g   | 117073 | 3625103   | 3625303   |
| 3 | 8929436   | 8964055 -   | NM_001025261 | Tpd52   | -6322  | 8970377   | 8970577   |

|   |          |            |              |         |       |          |          |
|---|----------|------------|--------------|---------|-------|----------|----------|
| 3 | 8929436  | 8964055 -  | NM_001025261 | Tpd52   | 17546 | 8946309  | 8946509  |
| 3 | 8929436  | 8964055 -  | NM_001025262 | Tpd52   | -6322 | 8970377  | 8970577  |
| 3 | 8929436  | 8964055 -  | NM_001025262 | Tpd52   | 17546 | 8946309  | 8946509  |
| 3 | 8929436  | 9004516 -  | NM_001025263 | Tpd52   | 33939 | 8970377  | 8970577  |
| 3 | 8929436  | 9004516 -  | NM_001025263 | Tpd52   | 58007 | 8946309  | 8946509  |
| 3 | 8929436  | 9004516 -  | NM_001025264 | Tpd52   | 33939 | 8970377  | 8970577  |
| 3 | 8929436  | 9004516 -  | NM_001025264 | Tpd52   | 58007 | 8946309  | 8946509  |
| 3 | 8929436  | 9004516 -  | NM_009412    | Tpd52   | 33939 | 8970377  | 8970577  |
| 3 | 8929436  | 9004516 -  | NM_009412    | Tpd52   | 58007 | 8946309  | 8946509  |
| 3 | 9427010  | 9610086 -  | NM_133218    | Zfp704  | 88020 | 9521866  | 9522066  |
| 3 | 10244209 | 10301184 - | NM_029310    | Fabp12  | -3551 | 10304735 | 10304935 |
| 3 | 10311956 | 10331440 - | NM_001310433 | Impa1   | 16611 | 10314629 | 10314829 |
| 3 | 10311956 | 10331440 - | NM_001310433 | Impa1   | 12434 | 10318806 | 10319006 |
| 3 | 10311956 | 10331440 - | NM_018864    | Impa1   | 16611 | 10314629 | 10314829 |
| 3 | 10311956 | 10331440 - | NM_018864    | Impa1   | 12434 | 10318806 | 10319006 |
| 3 | 14641727 | 14663003 + | NM_024495    | Car13   | 12103 | 14653830 | 14654030 |
| 3 | 14641727 | 14663003 + | NM_024495    | Car13   | 7062  | 14648789 | 14648989 |
| 3 | 16083183 | 16117039 + | NM_001145919 | Ythdf3  | 26895 | 16110078 | 16110278 |
| 3 | 16083183 | 16117039 + | NM_172677    | Ythdf3  | 26895 | 16110078 | 16110278 |
| 3 | 16083183 | 16117039 + | NR_027375    | Ythdf3  | 26895 | 16110078 | 16110278 |
| 3 | 17971950 | 18143339 - | NM_007825    | Cyp7b1  | 33420 | 18109719 | 18109919 |
| 3 | 19087329 | 19120818 + | NM_001253390 | Mtfr1   | 30916 | 19118245 | 19118445 |
| 3 | 19087329 | 19120818 + | NM_001253391 | Mtfr1   | 30916 | 19118245 | 19118445 |
| 3 | 19088221 | 19120818 + | NM_026182    | Mtfr1   | 30024 | 19118245 | 19118445 |
| 3 | 19088221 | 19120818 + | NR_045575    | Mtfr1   | 30024 | 19118245 | 19118445 |
| 3 | 19408595 | 19510863 + | NM_001163536 | Dnajc5b | 40845 | 19449440 | 19449640 |
| 3 | 19408595 | 19510863 + | NM_025489    | Dnajc5b | 40845 | 19449440 | 19449640 |
| 3 | 19431247 | 19510863 + | NM_001163537 | Dnajc5b | 18193 | 19449440 | 19449640 |
| 3 | 19544460 | 19591600 + | NM_001081281 | Trim55  | 20175 | 19564635 | 19564835 |
| 3 | 21975574 | 22115517 + | NM_030732    | Tbl1xr1 | 6329  | 21981903 | 21982103 |

|   |          |            |              |         |        |          |          |
|---|----------|------------|--------------|---------|--------|----------|----------|
| 3 | 21975574 | 22115517 + | NM_030732    | Tbl1xr1 | 101477 | 22077051 | 22077251 |
| 3 | 21975574 | 22115517 + | NM_030732    | Tbl1xr1 | 91278  | 22066852 | 22067052 |
| 3 | 25330763 | 26052230 - | NM_001163387 | Nlgn1   | 188563 | 25863467 | 25863667 |
| 3 | 25330763 | 26230832 - | NM_138666    | Nlgn1   | 367165 | 25863467 | 25863667 |
| 3 | 27081926 | 27143834 + | NM_178772    | Nceh1   | 44975  | 27126901 | 27127101 |
| 3 | 27215999 | 27238588 + | NM_009425    | Tnfsf10 | 4183   | 27220182 | 27220382 |
| 3 | 27315084 | 27609362 - | NM_173182    | Fndc3b  | 239524 | 27369638 | 27369838 |
| 3 | 27315084 | 27609362 - | NM_173182    | Fndc3b  | 24830  | 27584332 | 27584532 |
| 3 | 27315084 | 27609362 - | NM_173182    | Fndc3b  | 47219  | 27561943 | 27562143 |
| 3 | 27837602 | 28032285 + | NM_001164056 | Pld1    | 81126  | 27918728 | 27918928 |
| 3 | 27837602 | 28032285 + | NM_001164056 | Pld1    | 91286  | 27928888 | 27929088 |
| 3 | 27837602 | 28032285 + | NM_001164056 | Pld1    | 56033  | 27893635 | 27893835 |
| 3 | 27837602 | 28032285 + | NM_001164056 | Pld1    | 32260  | 27869862 | 27870062 |
| 3 | 27883093 | 28032285 + | NM_008875    | Pld1    | 35635  | 27918728 | 27918928 |
| 3 | 27883093 | 28032285 + | NM_008875    | Pld1    | 45795  | 27928888 | 27929088 |
| 3 | 27883093 | 28032285 + | NM_008875    | Pld1    | 10542  | 27893635 | 27893835 |
| 3 | 28162136 | 28569508 + | NM_001163007 | Tnik    | 317879 | 28480015 | 28480215 |
| 3 | 28162136 | 28569508 + | NM_001163007 | Tnik    | 299804 | 28461940 | 28462140 |
| 3 | 28162136 | 28569508 + | NM_001163007 | Tnik    | 317169 | 28479305 | 28479505 |
| 3 | 28162136 | 28569508 + | NM_001163007 | Tnik    | 315998 | 28478134 | 28478334 |
| 3 | 28162136 | 28569508 + | NM_001163007 | Tnik    | 111672 | 28273808 | 28274008 |
| 3 | 28162136 | 28569508 + | NM_001163007 | Tnik    | 1012   | 28163148 | 28163348 |
| 3 | 28162136 | 28569508 + | NM_001163008 | Tnik    | 317879 | 28480015 | 28480215 |
| 3 | 28162136 | 28569508 + | NM_001163008 | Tnik    | 299804 | 28461940 | 28462140 |
| 3 | 28162136 | 28569508 + | NM_001163008 | Tnik    | 317169 | 28479305 | 28479505 |
| 3 | 28162136 | 28569508 + | NM_001163008 | Tnik    | 315998 | 28478134 | 28478334 |
| 3 | 28162136 | 28569508 + | NM_001163008 | Tnik    | 111672 | 28273808 | 28274008 |
| 3 | 28162136 | 28569508 + | NM_001163008 | Tnik    | 1012   | 28163148 | 28163348 |
| 3 | 28162136 | 28565372 + | NM_001163009 | Tnik    | 317879 | 28480015 | 28480215 |
| 3 | 28162136 | 28565372 + | NM_001163009 | Tnik    | 299804 | 28461940 | 28462140 |

|   |          |            |              |        |        |          |          |
|---|----------|------------|--------------|--------|--------|----------|----------|
| 3 | 28162136 | 28565372 + | NM_001163009 | Tnik   | 317169 | 28479305 | 28479505 |
| 3 | 28162136 | 28565372 + | NM_001163009 | Tnik   | 315998 | 28478134 | 28478334 |
| 3 | 28162136 | 28565372 + | NM_001163009 | Tnik   | 111672 | 28273808 | 28274008 |
| 3 | 28162136 | 28565372 + | NM_001163009 | Tnik   | 1012   | 28163148 | 28163348 |
| 3 | 28162136 | 28569508 + | NM_026910    | Tnik   | 317879 | 28480015 | 28480215 |
| 3 | 28162136 | 28569508 + | NM_026910    | Tnik   | 299804 | 28461940 | 28462140 |
| 3 | 28162136 | 28569508 + | NM_026910    | Tnik   | 317169 | 28479305 | 28479505 |
| 3 | 28162136 | 28569508 + | NM_026910    | Tnik   | 315998 | 28478134 | 28478334 |
| 3 | 28162136 | 28569508 + | NM_026910    | Tnik   | 111672 | 28273808 | 28274008 |
| 3 | 28162136 | 28569508 + | NM_026910    | Tnik   | 1012   | 28163148 | 28163348 |
| 3 | 28596825 | 28627283 + | NM_031197    | Slc2a2 | 7897   | 28604722 | 28604922 |
| 3 | 28596825 | 28627283 + | NM_031197    | Slc2a2 | 23904  | 28620729 | 28620929 |
| 3 | 28596825 | 28627283 + | NM_031197    | Slc2a2 | 1912   | 28598737 | 28598937 |
| 3 | 28596825 | 28627283 + | NM_031197    | Slc2a2 | -1355  | 28595270 | 28595470 |
| 3 | 28981499 | 29589979 + | NM_001167748 | Egfem1 | 582517 | 29564016 | 29564216 |
| 3 | 28981499 | 29589979 + | NM_029412    | Egfem1 | 582517 | 29564016 | 29564216 |
| 3 | 29850218 | 29912127 - | NM_007963    | Mecom  | 55     | 29911872 | 29912072 |
| 3 | 30135491 | 30408410 - | NM_021442    | Mecom  | 55678  | 30352532 | 30352732 |
| 3 | 30135491 | 30408410 - | NM_021442    | Mecom  | 27199  | 30381011 | 30381211 |
| 3 | 30135491 | 30408410 - | NM_021442    | Mecom  | 27849  | 30380361 | 30380561 |
| 3 | 30135491 | 30408410 - | NM_021442    | Mecom  | 205680 | 30202530 | 30202730 |
| 3 | 30135491 | 30408410 - | NM_021442    | Mecom  | 91011  | 30317199 | 30317399 |
| 3 | 30135491 | 30408410 - | NM_021442    | Mecom  | 154898 | 30253312 | 30253512 |
| 3 | 30135491 | 30408410 - | NM_021442    | Mecom  | 263202 | 30145008 | 30145208 |
| 3 | 30495995 | 30498793 - | NM_029690    | Actrt3 | -9212  | 30508005 | 30508205 |
| 3 | 30495995 | 30498793 - | NM_029690    | Actrt3 | -1405  | 30500198 | 30500398 |
| 3 | 30501009 | 30518796 + | NM_001289621 | Mynn   | 6996   | 30508005 | 30508205 |
| 3 | 30501009 | 30518796 + | NM_001289621 | Mynn   | -611   | 30500198 | 30500398 |
| 3 | 30501009 | 30518796 + | NM_001289621 | Mynn   | -9329  | 30491480 | 30491680 |
| 3 | 30501009 | 30518796 + | NM_001289622 | Mynn   | 6996   | 30508005 | 30508205 |

|   |          |            |              |               |       |          |          |
|---|----------|------------|--------------|---------------|-------|----------|----------|
| 3 | 30501009 | 30518796 + | NM_001289622 | Mynn          | -611  | 30500198 | 30500398 |
| 3 | 30501009 | 30518796 + | NM_001289622 | Mynn          | -9329 | 30491480 | 30491680 |
| 3 | 30501009 | 30518796 + | NM_001289623 | Mynn          | 6996  | 30508005 | 30508205 |
| 3 | 30501009 | 30518796 + | NM_001289623 | Mynn          | -611  | 30500198 | 30500398 |
| 3 | 30501009 | 30518796 + | NM_001289623 | Mynn          | -9329 | 30491480 | 30491680 |
| 3 | 30501009 | 30518796 + | NM_030557    | Mynn          | 6996  | 30508005 | 30508205 |
| 3 | 30501009 | 30518796 + | NM_030557    | Mynn          | -611  | 30500198 | 30500398 |
| 3 | 30501009 | 30518796 + | NM_030557    | Mynn          | -9329 | 30491480 | 30491680 |
| 3 | 30577476 | 30598766 - | NM_001309233 | Lrrc31        | 1642  | 30596924 | 30597124 |
| 3 | 30754872 | 30796117 + | NM_001134385 | Gpr160        | 496   | 30755368 | 30755568 |
| 3 | 30754872 | 30796117 + | NM_001134386 | Gpr160        | 496   | 30755368 | 30755568 |
| 3 | 30754872 | 30796117 + | NM_001286994 | Gpr160        | 496   | 30755368 | 30755568 |
| 3 | 30754872 | 30796117 + | NM_001286995 | Gpr160        | 496   | 30755368 | 30755568 |
| 3 | 30754872 | 30796117 + | NM_001286996 | Gpr160        | 496   | 30755368 | 30755568 |
| 3 | 30754872 | 30796117 + | NM_027965    | Gpr160        | 496   | 30755368 | 30755568 |
| 3 | 30894693 | 30951663 + | NM_008857    | Prkci         | 21355 | 30916048 | 30916248 |
| 3 | 30894693 | 30951663 + | NM_008857    | Prkci         | -7501 | 30886992 | 30887192 |
| 3 | 30993980 | 31021846 + | NM_001039090 | Skil          | 3618  | 30997598 | 30997798 |
| 3 | 30993980 | 31021846 + | NM_001039090 | Skil          | 6365  | 31000345 | 31000545 |
| 3 | 30993980 | 31021846 + | NM_001271772 | Skil          | 3618  | 30997598 | 30997798 |
| 3 | 30993980 | 31021846 + | NM_001271772 | Skil          | 6365  | 31000345 | 31000545 |
| 3 | 30993980 | 31021846 + | NM_011386    | Skil          | 3618  | 30997598 | 30997798 |
| 3 | 30993980 | 31021846 + | NM_011386    | Skil          | 6365  | 31000345 | 31000545 |
| 3 | 33919001 | 33968267 + | NM_001113188 | Fxr1          | 10617 | 33929618 | 33929818 |
| 3 | 33919001 | 33968267 + | NM_001113189 | Fxr1          | 10617 | 33929618 | 33929818 |
| 3 | 33919001 | 33968267 + | NM_008053    | Fxr1          | 10617 | 33929618 | 33929818 |
| 3 | 35496074 | 35565086 - | NR_040748    | Gm6639        | -2979 | 35568065 | 35568265 |
| 3 | 35653060 | 35755199 + | NM_029570    | Atp11b        | -7145 | 35645715 | 35645915 |
| 3 | 36451528 | 36464650 + | NM_019393    | Exosc9        | -22   | 36451306 | 36451506 |
| 3 | 36762028 | 36951956 + | NM_172679    | 4932438A13Rik | -799  | 36761029 | 36761229 |

|   |          |            |              |               |       |          |          |
|---|----------|------------|--------------|---------------|-------|----------|----------|
| 3 | 37797735 | 37891651 + | NR_040559    | Gm20755       | 9029  | 37806764 | 37806964 |
| 3 | 38348183 | 38383739 - | NM_001167883 | Ankrd50       | -379  | 38384118 | 38384318 |
| 3 | 40512793 | 40530017 + | NM_178386    | Slc25a31      | 7220  | 40520013 | 40520213 |
| 3 | 40603873 | 40620806 + | NM_011495    | Plk4          | -1127 | 40602546 | 40602746 |
| 3 | 40603873 | 40620806 + | NM_173169    | Plk4          | -1127 | 40602546 | 40602746 |
| 3 | 40603873 | 40620806 + | NR_045576    | Plk4          | -1127 | 40602546 | 40602746 |
| 3 | 40622094 | 40650777 - | NM_028140    | Mfsd8         | 1799  | 40648778 | 40648978 |
| 3 | 40622094 | 40650777 - | NM_028140    | Mfsd8         | 3946  | 40646631 | 40646831 |
| 3 | 40650921 | 40679532 + | NR_038067    | Gm2011        | -1943 | 40648778 | 40648978 |
| 3 | 40650921 | 40679532 + | NR_038067    | Gm2011        | -4090 | 40646631 | 40646831 |
| 3 | 40698199 | 40740230 + | NM_026622    | 3110057O12Rik | -1868 | 40696131 | 40696331 |
| 3 | 40754553 | 40781716 + | NM_001040399 | Larp1b        | 12312 | 40766865 | 40767065 |
| 3 | 40754553 | 40781716 + | NM_001040399 | Larp1b        | -5245 | 40749108 | 40749308 |
| 3 | 41304853 | 41332397 - | NR_130791    | 2400006E01Rik | 5474  | 41326723 | 41326923 |
| 3 | 41359656 | 41420787 + | NM_001130184 | Jade1         | 35158 | 41394814 | 41395014 |
| 3 | 41367305 | 41420787 + | NM_172303    | Jade1         | 27509 | 41394814 | 41395014 |
| 3 | 41367673 | 41420787 + | NM_001130185 | Jade1         | 27141 | 41394814 | 41395014 |
| 3 | 41368802 | 41420787 + | NM_001130186 | Jade1         | 26012 | 41394814 | 41395014 |
| 3 | 51028369 | 51055577 + | NM_009834    | Ccrn4l        | 9067  | 51037436 | 51037636 |
| 3 | 51028369 | 51055577 + | NM_009834    | Ccrn4l        | -1106 | 51027063 | 51027263 |
| 3 | 51056642 | 51144567 - | NM_001291059 | Elf2          | 16490 | 51127877 | 51128077 |
| 3 | 51056642 | 51144567 - | NM_001291059 | Elf2          | 10229 | 51134138 | 51134338 |
| 3 | 51056642 | 51144567 - | NM_023502    | Elf2          | 16490 | 51127877 | 51128077 |
| 3 | 51056642 | 51144567 - | NM_023502    | Elf2          | 10229 | 51134138 | 51134338 |
| 3 | 51219938 | 51279908 + | NM_053089    | Naa15         | 9002  | 51228940 | 51229140 |
| 3 | 51319240 | 51364746 - | NM_080793    | Setd7         | 43043 | 51321503 | 51321703 |
| 3 | 51465101 | 51486597 + | NM_001310482 | Mgst2         | 10003 | 51475104 | 51475304 |
| 3 | 51465101 | 51486597 + | NM_001310482 | Mgst2         | 11552 | 51476653 | 51476853 |
| 3 | 51465101 | 51486597 + | NM_001310482 | Mgst2         | 9519  | 51474620 | 51474820 |
| 3 | 51465101 | 51486597 + | NM_174995    | Mgst2         | 10003 | 51475104 | 51475304 |

|   |          |            |              |               |        |          |          |
|---|----------|------------|--------------|---------------|--------|----------|----------|
| 3 | 51465101 | 51486597 + | NM_174995    | Mgst2         | 11552  | 51476653 | 51476853 |
| 3 | 51465101 | 51486597 + | NM_174995    | Mgst2         | 9519   | 51474620 | 51474820 |
| 3 | 51491535 | 51908929 - | NM_001004176 | Maml3         | 2238   | 51906491 | 51906691 |
| 3 | 51491535 | 51908929 - | NM_001004176 | Maml3         | 371096 | 51537633 | 51537833 |
| 3 | 51491535 | 51908929 - | NM_001004176 | Maml3         | 230884 | 51677845 | 51678045 |
| 3 | 52072259 | 52154032 + | NM_019739    | Foxo1         | 14178  | 52086437 | 52086637 |
| 3 | 52786045 | 52821146 - | NM_026225    | Cog6          | 247    | 52820699 | 52820899 |
| 3 | 52845469 | 53065602 + | NM_175386    | Lhfp          | 64265  | 52909734 | 52909934 |
| 3 | 53255918 | 53267181 - | NM_172501    | Nhlrc3        | 9296   | 53257685 | 53257885 |
| 3 | 53267739 | 53285678 + | NM_173382    | Proser1       | -9854  | 53257685 | 53257885 |
| 3 | 54497027 | 54520760 + | NM_019995    | Supt20        | -6965  | 54489862 | 54490062 |
| 3 | 54559504 | 54605192 + | NM_019483    | Smad9         | 41007  | 54600511 | 54600711 |
| 3 | 54859164 | 54887925 + | NR_040593    | 4931419H13Rik | 24854  | 54884018 | 54884218 |
| 3 | 54916030 | 54941255 + | NM_001144988 | Spg20         | 7300   | 54923330 | 54923530 |
| 3 | 54916030 | 54941255 + | NM_144895    | Spg20         | 7300   | 54923330 | 54923530 |
| 3 | 54916088 | 54941255 + | NM_001144987 | Spg20         | 7242   | 54923330 | 54923530 |
| 3 | 55429120 | 55987624 - | NM_030595    | Nbea          | 83654  | 55903770 | 55903970 |
| 3 | 57229332 | 57245598 + | NM_145539    | Tm4sf4        | 9954   | 57239286 | 57239486 |
| 3 | 58219611 | 58270710 + | NM_001081229 | Tsc22d2       | 38865  | 58258476 | 58258676 |
| 3 | 58478871 | 58496311 - | NM_009174    | Siah2         | -2398  | 58498709 | 58498909 |
| 3 | 58496511 | 58592447 + | NR_045167    | 4930593A02Rik | 2198   | 58498709 | 58498909 |
| 3 | 60276752 | 60433673 + | NM_001253713 | Mbnl1         | 55514  | 60332266 | 60332466 |
| 3 | 60276752 | 60433673 + | NM_001253713 | Mbnl1         | 128933 | 60405685 | 60405885 |
| 3 | 60276752 | 60433673 + | NM_001253713 | Mbnl1         | 101432 | 60378184 | 60378384 |
| 3 | 60276752 | 60433673 + | NM_001253713 | Mbnl1         | 49510  | 60326262 | 60326462 |
| 3 | 60305101 | 60433673 + | NM_001253708 | Mbnl1         | 27165  | 60332266 | 60332466 |
| 3 | 60305101 | 60433673 + | NM_001253708 | Mbnl1         | 100584 | 60405685 | 60405885 |
| 3 | 60305101 | 60433673 + | NM_001253708 | Mbnl1         | 73083  | 60378184 | 60378384 |
| 3 | 60305101 | 60433673 + | NM_001253708 | Mbnl1         | 21161  | 60326262 | 60326462 |
| 3 | 60305101 | 60433673 + | NM_001253709 | Mbnl1         | 27165  | 60332266 | 60332466 |

|   |          |            |              |          |        |          |          |
|---|----------|------------|--------------|----------|--------|----------|----------|
| 3 | 60305101 | 60433673 + | NM_001253709 | Mbnl1    | 100584 | 60405685 | 60405885 |
| 3 | 60305101 | 60433673 + | NM_001253709 | Mbnl1    | 73083  | 60378184 | 60378384 |
| 3 | 60305101 | 60433673 + | NM_001253709 | Mbnl1    | 21161  | 60326262 | 60326462 |
| 3 | 60305101 | 60433673 + | NM_001253710 | Mbnl1    | 27165  | 60332266 | 60332466 |
| 3 | 60305101 | 60433673 + | NM_001253710 | Mbnl1    | 100584 | 60405685 | 60405885 |
| 3 | 60305101 | 60433673 + | NM_001253710 | Mbnl1    | 73083  | 60378184 | 60378384 |
| 3 | 60305101 | 60433673 + | NM_001253710 | Mbnl1    | 21161  | 60326262 | 60326462 |
| 3 | 60305101 | 60433673 + | NM_001253711 | Mbnl1    | 27165  | 60332266 | 60332466 |
| 3 | 60305101 | 60433673 + | NM_001253711 | Mbnl1    | 100584 | 60405685 | 60405885 |
| 3 | 60305101 | 60433673 + | NM_001253711 | Mbnl1    | 73083  | 60378184 | 60378384 |
| 3 | 60305101 | 60433673 + | NM_001253711 | Mbnl1    | 21161  | 60326262 | 60326462 |
| 3 | 60305101 | 60433673 + | NM_001310514 | Mbnl1    | 27165  | 60332266 | 60332466 |
| 3 | 60305101 | 60433673 + | NM_001310514 | Mbnl1    | 100584 | 60405685 | 60405885 |
| 3 | 60305101 | 60433673 + | NM_001310514 | Mbnl1    | 73083  | 60378184 | 60378384 |
| 3 | 60305101 | 60433673 + | NM_001310514 | Mbnl1    | 21161  | 60326262 | 60326462 |
| 3 | 60305101 | 60433673 + | NM_020007    | Mbnl1    | 27165  | 60332266 | 60332466 |
| 3 | 60305101 | 60433673 + | NM_020007    | Mbnl1    | 100584 | 60405685 | 60405885 |
| 3 | 60305101 | 60433673 + | NM_020007    | Mbnl1    | 73083  | 60378184 | 60378384 |
| 3 | 60305101 | 60433673 + | NM_020007    | Mbnl1    | 21161  | 60326262 | 60326462 |
| 3 | 62142699 | 62266144 + | NM_001081295 | Arhgef26 | 107840 | 62250539 | 62250739 |
| 3 | 62142699 | 62266144 + | NM_001081295 | Arhgef26 | 9749   | 62152448 | 62152648 |
| 3 | 62142699 | 62266144 + | NM_001081295 | Arhgef26 | 82340  | 62225039 | 62225239 |
| 3 | 62142699 | 62266144 + | NM_001081295 | Arhgef26 | 100763 | 62243462 | 62243662 |
| 3 | 62142699 | 62266144 + | NM_001081295 | Arhgef26 | 87146  | 62229845 | 62230045 |
| 3 | 62142699 | 62266144 + | NM_001081295 | Arhgef26 | 46123  | 62188822 | 62189022 |
| 3 | 62142699 | 62266144 + | NM_001081295 | Arhgef26 | 13343  | 62156042 | 62156242 |
| 3 | 63099357 | 63187636 + | NM_001289462 | Mme      | 57219  | 63156576 | 63156776 |
| 3 | 63099357 | 63187636 + | NM_001289462 | Mme      | 63969  | 63163326 | 63163526 |
| 3 | 63099794 | 63187636 + | NM_008604    | Mme      | 56782  | 63156576 | 63156776 |
| 3 | 63099794 | 63187636 + | NM_008604    | Mme      | 63532  | 63163326 | 63163526 |



|   |          |            |              |         |        |          |          |
|---|----------|------------|--------------|---------|--------|----------|----------|
| 3 | 63100017 | 63187636 + | NM_001289463 | Mme     | 56559  | 63156576 | 63156776 |
| 3 | 63100017 | 63187636 + | NM_001289463 | Mme     | 63309  | 63163326 | 63163526 |
| 3 | 63500156 | 63654914 - | NM_001177732 | Plch1   | -4724  | 63659638 | 63659838 |
| 3 | 63500156 | 63654914 - | NM_001177732 | Plch1   | 36843  | 63617871 | 63618071 |
| 3 | 63500156 | 63654914 - | NM_001177733 | Plch1   | -4724  | 63659638 | 63659838 |
| 3 | 63500156 | 63654914 - | NM_001177733 | Plch1   | 36843  | 63617871 | 63618071 |
| 3 | 63500156 | 63654914 - | NM_183191    | Plch1   | -4724  | 63659638 | 63659838 |
| 3 | 63500156 | 63654914 - | NM_183191    | Plch1   | 36843  | 63617871 | 63618071 |
| 3 | 63780065 | 63823001 + | NM_001033300 | Gmps    | 0      | 63779888 | 63780088 |
| 3 | 65332369 | 65359441 + | NM_178892    | Tiparp  | 13172  | 65345541 | 65345741 |
| 3 | 65463210 | 65463349 + | NR_106200    | Mir8120 | 319    | 65463529 | 65463729 |
| 3 | 65470150 | 65490104 + | NM_001037923 | Lekr1   | -6421  | 65463529 | 65463729 |
| 3 | 65470150 | 65635085 + | NM_001166659 | Lekr1   | -6421  | 65463529 | 65463729 |
| 3 | 67696142 | 68430405 + | NM_001113419 | Gm21949 | 387759 | 68083901 | 68084101 |
| 3 | 67868724 | 68430405 + | NM_001113420 | Schip1  | 215177 | 68083901 | 68084101 |
| 3 | 67868724 | 68430405 + | NM_001113421 | Schip1  | 215177 | 68083901 | 68084101 |
| 3 | 69026341 | 69027541 + | NM_027843    | Arl14   | 0      | 69026205 | 69026405 |
| 3 | 69026341 | 69027541 + | NM_027843    | Arl14   | -321   | 69025820 | 69026020 |
| 3 | 69120840 | 69359319 + | NM_178726    | Ppm1l   | 46024  | 69166864 | 69167064 |
| 3 | 69623461 | 69663817 - | NM_001164210 | Sptssb  | -9944  | 69673761 | 69673961 |
| 3 | 69623461 | 69663817 - | NM_001164210 | Sptssb  | -377   | 69664194 | 69664394 |
| 3 | 69623461 | 69663817 - | NM_001286959 | Sptssb  | -9944  | 69673761 | 69673961 |
| 3 | 69623461 | 69663817 - | NM_001286959 | Sptssb  | -377   | 69664194 | 69664394 |
| 3 | 69623461 | 69663817 - | NM_133675    | Sptssb  | -9944  | 69673761 | 69673961 |
| 3 | 69623461 | 69663817 - | NM_133675    | Sptssb  | -377   | 69664194 | 69664394 |
| 3 | 72692482 | 72770789 - | NM_001081137 | Sis     | 3622   | 72766967 | 72767167 |
| 3 | 72692482 | 72770789 - | NM_001081137 | Sis     | 18403  | 72752186 | 72752386 |
| 3 | 75320412 | 75360775 - | NM_019745    | Pdcd10  | 34020  | 75326555 | 75326755 |
| 3 | 75320412 | 75360775 - | NM_019745    | Pdcd10  | 22532  | 75338043 | 75338243 |
| 3 | 75680105 | 75760872 - | NM_001291069 | Golim4  | 3982   | 75756690 | 75756890 |

|   |          |            |              |         |       |          |          |
|---|----------|------------|--------------|---------|-------|----------|----------|
| 3 | 75680105 | 75760872 - | NM_175193    | Golim4  | 3982  | 75756690 | 75756890 |
| 3 | 79617075 | 79646585 - | NM_027495    | Tmem144 | -9462 | 79656047 | 79656247 |
| 3 | 79689852 | 79750201 + | NM_133187    | Fam198b | 58577 | 79748429 | 79748629 |
| 3 | 79689852 | 79750201 + | NM_133187    | Fam198b | 28204 | 79718056 | 79718256 |
| 3 | 83891856 | 83959709 - | NM_029797    | Mnd1    | 62603 | 83896906 | 83897106 |
| 3 | 83964361 | 84074706 - | NM_001271725 | Trim2   | 22495 | 84052011 | 84052211 |
| 3 | 83964361 | 84074706 - | NM_001271725 | Trim2   | -8396 | 84083102 | 84083302 |
| 3 | 83964361 | 84074706 - | NM_001271725 | Trim2   | 21617 | 84052889 | 84053089 |
| 3 | 83964361 | 84074706 - | NM_001271725 | Trim2   | 38157 | 84036349 | 84036549 |
| 3 | 83964361 | 84074706 - | NM_001271725 | Trim2   | 34648 | 84039858 | 84040058 |
| 3 | 83964361 | 84074706 - | NM_001271725 | Trim2   | 44722 | 84029784 | 84029984 |
| 3 | 83964361 | 84108698 - | NM_001271726 | Trim2   | 18935 | 84089563 | 84089763 |
| 3 | 83964361 | 84108698 - | NM_001271726 | Trim2   | 18215 | 84090283 | 84090483 |
| 3 | 83964361 | 84108698 - | NM_001271726 | Trim2   | 56487 | 84052011 | 84052211 |
| 3 | 83964361 | 84108698 - | NM_001271726 | Trim2   | 25396 | 84083102 | 84083302 |
| 3 | 83964361 | 84108698 - | NM_001271726 | Trim2   | 55609 | 84052889 | 84053089 |
| 3 | 83964361 | 84108698 - | NM_001271726 | Trim2   | 72149 | 84036349 | 84036549 |
| 3 | 83964361 | 84108698 - | NM_001271726 | Trim2   | 68640 | 84039858 | 84040058 |
| 3 | 83964361 | 84108698 - | NM_001271726 | Trim2   | 78714 | 84029784 | 84029984 |
| 3 | 83964361 | 84063702 - | NM_001271727 | Trim2   | 11491 | 84052011 | 84052211 |
| 3 | 83964361 | 84063702 - | NM_001271727 | Trim2   | 10613 | 84052889 | 84053089 |
| 3 | 83964361 | 84063702 - | NM_001271727 | Trim2   | 27153 | 84036349 | 84036549 |
| 3 | 83964361 | 84063702 - | NM_001271727 | Trim2   | 23644 | 84039858 | 84040058 |
| 3 | 83964361 | 84063702 - | NM_001271727 | Trim2   | 33718 | 84029784 | 84029984 |
| 3 | 83964361 | 84024800 - | NM_030706    | Trim2   | -4984 | 84029784 | 84029984 |
| 3 | 84246118 | 84284362 - | NM_001033301 | Fhdc1   | 12041 | 84272121 | 84272321 |
| 3 | 84246118 | 84284362 - | NM_001033301 | Fhdc1   | 15018 | 84269144 | 84269344 |
| 3 | 84246118 | 84284362 - | NM_001033301 | Fhdc1   | 19143 | 84265019 | 84265219 |
| 3 | 84246118 | 84283414 - | NM_001205355 | Fhdc1   | 11093 | 84272121 | 84272321 |
| 3 | 84246118 | 84283414 - | NM_001205355 | Fhdc1   | 14070 | 84269144 | 84269344 |

|   |          |            |              |          |        |          |          |
|---|----------|------------|--------------|----------|--------|----------|----------|
| 3 | 84246118 | 84283414 - | NM_001205355 | Fhdc1    | 18195  | 84265019 | 84265219 |
| 3 | 84300015 | 84386548 - | NM_001081093 | Arfip1   | 37989  | 84348359 | 84348559 |
| 3 | 84300015 | 84386548 - | NM_001293801 | Arfip1   | 37989  | 84348359 | 84348559 |
| 3 | 84619499 | 84783121 + | NM_001177773 | Fbxw7    | 106810 | 84726309 | 84726509 |
| 3 | 84668067 | 84783121 + | NM_001177774 | Fbxw7    | 58242  | 84726309 | 84726509 |
| 3 | 85378051 | 85458393 + | NM_144896    | Gatb     | 45963  | 85424014 | 85424214 |
| 3 | 85463985 | 85550132 - | NM_172682    | Fam160a1 | 35226  | 85514706 | 85514906 |
| 3 | 85463985 | 85550132 - | NM_172682    | Fam160a1 | 51859  | 85498073 | 85498273 |
| 3 | 85673768 | 85691441 - | NM_177130    | Glt28d2  | 7719   | 85683522 | 85683722 |
| 3 | 85673768 | 85691441 - | NM_177130    | Glt28d2  | 6536   | 85684705 | 85684905 |
| 3 | 85888356 | 85934444 + | NM_001082414 | Sh3d19   | 30055  | 85918411 | 85918611 |
| 3 | 85888356 | 85934444 + | NM_001082414 | Sh3d19   | 24260  | 85912616 | 85912816 |
| 3 | 86028612 | 86550633 + | NM_001077687 | Lrba     | 403702 | 86432314 | 86432514 |
| 3 | 86028612 | 86550633 + | NM_001077687 | Lrba     | 6797   | 86035409 | 86035609 |
| 3 | 86028612 | 86550633 + | NM_001077687 | Lrba     | 140009 | 86168621 | 86168821 |
| 3 | 86028612 | 86550633 + | NM_001077687 | Lrba     | 29091  | 86057703 | 86057903 |
| 3 | 86028612 | 86550633 + | NM_001077687 | Lrba     | -2727  | 86025685 | 86025885 |
| 3 | 86028612 | 86580894 + | NM_001077688 | Lrba     | 403702 | 86432314 | 86432514 |
| 3 | 86028612 | 86580894 + | NM_001077688 | Lrba     | 6797   | 86035409 | 86035609 |
| 3 | 86028612 | 86580894 + | NM_001077688 | Lrba     | 140009 | 86168621 | 86168821 |
| 3 | 86028612 | 86580894 + | NM_001077688 | Lrba     | 29091  | 86057703 | 86057903 |
| 3 | 86028612 | 86580894 + | NM_001077688 | Lrba     | -2727  | 86025685 | 86025885 |
| 3 | 86028612 | 86586617 + | NM_030695    | Lrba     | 403702 | 86432314 | 86432514 |
| 3 | 86028612 | 86586617 + | NM_030695    | Lrba     | 6797   | 86035409 | 86035609 |
| 3 | 86028612 | 86586617 + | NM_030695    | Lrba     | 140009 | 86168621 | 86168821 |
| 3 | 86028612 | 86586617 + | NM_030695    | Lrba     | 29091  | 86057703 | 86057903 |
| 3 | 86028612 | 86586617 + | NM_030695    | Lrba     | -2727  | 86025685 | 86025885 |
| 3 | 87422673 | 87541956 + | NM_001003912 | Arhgef11 | 864    | 87423537 | 87423737 |
| 3 | 87946294 | 87976014 + | NM_001310587 | Mef2d    | -231   | 87945863 | 87946063 |
| 3 | 87946294 | 87976014 + | NM_001310593 | Mef2d    | -231   | 87945863 | 87946063 |

|   |          |            |              |          |       |          |          |
|---|----------|------------|--------------|----------|-------|----------|----------|
| 3 | 87946294 | 87976014 + | NM_133665    | Mef2d    | -231  | 87945863 | 87946063 |
| 3 | 88019093 | 88019180 + | NR_037276    | Mir3093  | 342   | 88019435 | 88019635 |
| 3 | 88019520 | 88019609 + | NR_029817    | Mir9-1   | 0     | 88019435 | 88019635 |
| 3 | 88046796 | 88058607 - | NM_021375    | Rhbg     | -2287 | 88060894 | 88061094 |
| 3 | 88181658 | 88182622 - | NM_001032298 | Bglap2   | -9390 | 88192012 | 88192212 |
| 3 | 88187417 | 88188389 - | NM_001037939 | Bglap    | -3623 | 88192012 | 88192212 |
| 3 | 88187417 | 88188389 - | NM_007541    | Bglap    | -3623 | 88192012 | 88192212 |
| 3 | 88198060 | 88214320 - | NM_001310605 | Pmf1     | -1347 | 88215667 | 88215867 |
| 3 | 88198060 | 88214320 - | NM_001310605 | Pmf1     | -5364 | 88219684 | 88219884 |
| 3 | 88198060 | 88214320 - | NM_025928    | Pmf1     | -1347 | 88215667 | 88215867 |
| 3 | 88198060 | 88214320 - | NM_025928    | Pmf1     | -5364 | 88219684 | 88219884 |
| 3 | 88214416 | 88229064 - | NM_001145876 | Slc25a44 | 13197 | 88215667 | 88215867 |
| 3 | 88214416 | 88229064 - | NM_001145876 | Slc25a44 | -2681 | 88231745 | 88231945 |
| 3 | 88214416 | 88229064 - | NM_001145876 | Slc25a44 | -2288 | 88231352 | 88231552 |
| 3 | 88214416 | 88229064 - | NM_001145876 | Slc25a44 | 9180  | 88219684 | 88219884 |
| 3 | 88214416 | 88229064 - | NM_001145877 | Slc25a44 | 13197 | 88215667 | 88215867 |
| 3 | 88214416 | 88229064 - | NM_001145877 | Slc25a44 | -2681 | 88231745 | 88231945 |
| 3 | 88214416 | 88229064 - | NM_001145877 | Slc25a44 | -2288 | 88231352 | 88231552 |
| 3 | 88214416 | 88229064 - | NM_001145877 | Slc25a44 | 9180  | 88219684 | 88219884 |
| 3 | 88214416 | 88229057 - | NM_001281795 | Slc25a44 | 13190 | 88215667 | 88215867 |
| 3 | 88214416 | 88229057 - | NM_001281795 | Slc25a44 | -2688 | 88231745 | 88231945 |
| 3 | 88214416 | 88229057 - | NM_001281795 | Slc25a44 | -2295 | 88231352 | 88231552 |
| 3 | 88214416 | 88229057 - | NM_001281795 | Slc25a44 | 9173  | 88219684 | 88219884 |
| 3 | 88214416 | 88229064 - | NM_178696    | Slc25a44 | 13197 | 88215667 | 88215867 |
| 3 | 88214416 | 88229064 - | NM_178696    | Slc25a44 | -2681 | 88231745 | 88231945 |
| 3 | 88214416 | 88229064 - | NM_178696    | Slc25a44 | -2288 | 88231352 | 88231552 |
| 3 | 88214416 | 88229064 - | NM_178696    | Slc25a44 | 9180  | 88219684 | 88219884 |
| 3 | 88239884 | 88265105 - | NM_001163489 | Sema4a   | 13218 | 88251687 | 88251887 |
| 3 | 88239884 | 88263024 - | NM_001163490 | Sema4a   | 11137 | 88251687 | 88251887 |
| 3 | 88239884 | 88262807 - | NM_001163491 | Sema4a   | 10920 | 88251687 | 88251887 |

|   |          |            |              |               |       |          |          |
|---|----------|------------|--------------|---------------|-------|----------|----------|
| 3 | 88239884 | 88259684 - | NM_013658    | Sema4a        | 7797  | 88251687 | 88251887 |
| 3 | 88244801 | 88244874 - | NR_105978    | Mir7011       | -6813 | 88251687 | 88251887 |
| 3 | 88336317 | 88345317 + | NM_001029890 | Mex3a         | -5386 | 88330731 | 88330931 |
| 3 | 88489716 | 88516856 + | NM_028814    | 2810403A07Rik | 1740  | 88491456 | 88491656 |
| 3 | 88489716 | 88516856 + | NM_028814    | 2810403A07Rik | 349   | 88490065 | 88490265 |
| 3 | 88724725 | 88754205 - | NM_001164533 | Dap3          | 1060  | 88752945 | 88753145 |
| 3 | 88724725 | 88754205 - | NM_022994    | Dap3          | 1060  | 88752945 | 88753145 |
| 3 | 88887901 | 88897286 - | NM_001083807 | Rusc1         | -9958 | 88907244 | 88907444 |
| 3 | 88887901 | 88897286 - | NM_028188    | Rusc1         | -9958 | 88907244 | 88907444 |
| 3 | 88897510 | 88905890 - | NM_001253751 | Fdps          | -1354 | 88907244 | 88907444 |
| 3 | 88897510 | 88905890 - | NM_134469    | Fdps          | -1354 | 88907244 | 88907444 |
| 3 | 88940064 | 88950517 + | NM_013631    | Pklr          | 3915  | 88943979 | 88944179 |
| 3 | 88940545 | 88950517 + | NM_001099779 | Pklr          | 3434  | 88943979 | 88944179 |
| 3 | 89031038 | 89031121 - | NR_030579    | Mir92b        | -6483 | 89037604 | 89037804 |
| 3 | 89038099 | 89049122 - | NM_001039466 | Trim46        | -9822 | 89058944 | 89059144 |
| 3 | 89038099 | 89049122 - | NM_001039466 | Trim46        | 6678  | 89042244 | 89042444 |
| 3 | 89038099 | 89049820 - | NM_183037    | Trim46        | -9124 | 89058944 | 89059144 |
| 3 | 89038099 | 89049820 - | NM_183037    | Trim46        | 7376  | 89042244 | 89042444 |
| 3 | 89038099 | 89048936 - | NR_121683    | Trim46        | 6492  | 89042244 | 89042444 |
| 3 | 89050360 | 89053652 + | NM_025327    | Krtcap2       | -7916 | 89042244 | 89042444 |
| 3 | 89050395 | 89053652 + | NM_001310625 | Krtcap2       | -7951 | 89042244 | 89042444 |
| 3 | 89118873 | 89126802 - | NM_010108    | Efna3         | -9393 | 89136195 | 89136395 |
| 3 | 89137315 | 89141951 - | NM_007910    | Efna4         | -3029 | 89144980 | 89145180 |
| 3 | 89143562 | 89153933 - | NM_001037722 | Adam15        | 8753  | 89144980 | 89145180 |
| 3 | 89143562 | 89153933 - | NM_009614    | Adam15        | 8753  | 89144980 | 89145180 |
| 3 | 89181568 | 89197126 - | NM_009565    | Zbtb7b        | 4668  | 89192258 | 89192458 |
| 3 | 89181568 | 89197126 - | NM_009565    | Zbtb7b        | -3208 | 89200334 | 89200534 |
| 3 | 89181568 | 89197126 - | NM_009565    | Zbtb7b        | 1704  | 89195222 | 89195422 |
| 3 | 89195786 | 89202702 + | NR_040403    | Gm15417       | -3328 | 89192258 | 89192458 |
| 3 | 89195786 | 89202702 + | NR_040403    | Gm15417       | 4548  | 89200334 | 89200534 |

|   |          |            |              |         |        |          |          |
|---|----------|------------|--------------|---------|--------|----------|----------|
| 3 | 89195786 | 89202702 + | NR_040403    | Gm15417 | -364   | 89195222 | 89195422 |
| 3 | 89198212 | 89202702 + | NR_040404    | Gm15417 | -5754  | 89192258 | 89192458 |
| 3 | 89198212 | 89202702 + | NR_040404    | Gm15417 | 2122   | 89200334 | 89200534 |
| 3 | 89198212 | 89202702 + | NR_040404    | Gm15417 | -2790  | 89195222 | 89195422 |
| 3 | 89324086 | 89476417 + | NM_080466    | Kcnn3   | 6678   | 89330764 | 89330964 |
| 3 | 89324086 | 89476417 + | NM_080466    | Kcnn3   | 151144 | 89475230 | 89475430 |
| 3 | 89324086 | 89476417 + | NM_080466    | Kcnn3   | -1541  | 89322345 | 89322545 |
| 3 | 89673246 | 89717119 - | NM_001310676 | Il6ra   | 31369  | 89685550 | 89685750 |
| 3 | 89673246 | 89717119 - | NM_010559    | Il6ra   | 31369  | 89685550 | 89685750 |
| 3 | 89876573 | 89896053 + | NM_001293748 | Tpm3    | 4713   | 89881286 | 89881486 |
| 3 | 89876573 | 89896053 + | NM_001293748 | Tpm3    | 8665   | 89885238 | 89885438 |
| 3 | 89876573 | 89904825 + | NM_022314    | Tpm3    | 4713   | 89881286 | 89881486 |
| 3 | 89876573 | 89904825 + | NM_022314    | Tpm3    | 8665   | 89885238 | 89885438 |
| 3 | 89883443 | 89904825 + | NM_001253738 | Tpm3    | -1957  | 89881286 | 89881486 |
| 3 | 89883443 | 89904825 + | NM_001253738 | Tpm3    | 1795   | 89885238 | 89885438 |
| 3 | 89883443 | 89904825 + | NM_001253740 | Tpm3    | -1957  | 89881286 | 89881486 |
| 3 | 89883443 | 89904825 + | NM_001253740 | Tpm3    | 1795   | 89885238 | 89885438 |
| 3 | 89883443 | 89904825 + | NM_001271764 | Tpm3    | -1957  | 89881286 | 89881486 |
| 3 | 89883443 | 89904825 + | NM_001271764 | Tpm3    | 1795   | 89885238 | 89885438 |
| 3 | 89883443 | 89902706 + | NM_001293749 | Tpm3    | -1957  | 89881286 | 89881486 |
| 3 | 89883443 | 89902706 + | NM_001293749 | Tpm3    | 1795   | 89885238 | 89885438 |
| 3 | 89908054 | 90015940 + | NM_029937    | Nup210l | 86552  | 89994606 | 89994806 |
| 3 | 89908054 | 90015940 + | NM_029937    | Nup210l | 10160  | 89918214 | 89918414 |
| 3 | 90016589 | 90017571 - | NM_027015    | Rps27   | 73     | 90017298 | 90017498 |
| 3 | 90016589 | 90017571 - | NR_033727    | Rps27   | 73     | 90017298 | 90017498 |
| 3 | 90016589 | 90017570 - | NM_001190258 | Rps27rt | 72     | 90017298 | 90017498 |
| 3 | 90017637 | 90030310 + | NM_001293741 | Rab13   | -139   | 90017298 | 90017498 |
| 3 | 90024706 | 90030310 + | NM_026677    | Rab13   | -7208  | 90017298 | 90017498 |
| 3 | 90254514 | 90269789 - | NM_008727    | Npr1    | -443   | 90270232 | 90270432 |
| 3 | 90280123 | 90292302 + | NM_026374    | Ilf2    | -9691  | 90270232 | 90270432 |

|   |          |            |              |        |       |          |          |
|---|----------|------------|--------------|--------|-------|----------|----------|
| 3 | 93629942 | 93631040 + | NM_207271    | Tdpoz3 | -2781 | 93626961 | 93627161 |
| 3 | 93629942 | 93631040 + | NM_207271    | Tdpoz3 | -2284 | 93627458 | 93627658 |
| 3 | 94176716 | 94202197 + | NM_011281    | Rorc   | -3735 | 94172781 | 94172981 |
| 3 | 94176716 | 94202197 + | NM_011281    | Rorc   | -2752 | 94173764 | 94173964 |
| 3 | 94176716 | 94202197 + | NM_011281    | Rorc   | -4944 | 94171572 | 94171772 |
| 3 | 94181354 | 94202197 + | NM_001293734 | Rorc   | -8373 | 94172781 | 94172981 |
| 3 | 94181354 | 94202197 + | NM_001293734 | Rorc   | -7390 | 94173764 | 94173964 |
| 3 | 94181354 | 94202197 + | NM_001293734 | Rorc   | -9582 | 94171572 | 94171772 |
| 3 | 94181354 | 94202197 + | NR_121656    | Rorc   | -8373 | 94172781 | 94172981 |
| 3 | 94181354 | 94202197 + | NR_121656    | Rorc   | -7390 | 94173764 | 94173964 |
| 3 | 94181354 | 94202197 + | NR_121656    | Rorc   | -9582 | 94171572 | 94171772 |
| 3 | 94268907 | 94277514 - | NM_025506    | Riid1  | -8528 | 94286042 | 94286242 |
| 3 | 94282217 | 94296121 + | NM_001289616 | Celf3  | 3825  | 94286042 | 94286242 |
| 3 | 94282217 | 94296121 + | NM_001289620 | Celf3  | 3825  | 94286042 | 94286242 |
| 3 | 94282471 | 94296121 + | NM_001289613 | Celf3  | 3571  | 94286042 | 94286242 |
| 3 | 94282471 | 94296121 + | NM_172434    | Celf3  | 3571  | 94286042 | 94286242 |
| 3 | 94286644 | 94296121 + | NR_110353    | Celf3  | -402  | 94286042 | 94286242 |
| 3 | 94301464 | 94386639 - | NM_001082484 | Snx27  | 55684 | 94330755 | 94330955 |
| 3 | 94301464 | 94386639 - | NM_001082484 | Snx27  | 7974  | 94378465 | 94378665 |
| 3 | 94301464 | 94386639 - | NM_029721    | Snx27  | 55684 | 94330755 | 94330955 |
| 3 | 94301464 | 94386639 - | NM_029721    | Snx27  | 7974  | 94378465 | 94378665 |
| 3 | 94563991 | 94590438 - | NM_001293727 | Cgn    | 3163  | 94587075 | 94587275 |
| 3 | 94563992 | 94590438 - | NM_001037711 | Cgn    | 3163  | 94587075 | 94587275 |
| 3 | 94641489 | 94687490 + | NM_001165948 | Pogz   | 10045 | 94651534 | 94651734 |
| 3 | 94641489 | 94687490 + | NM_001165948 | Pogz   | -1342 | 94639947 | 94640147 |
| 3 | 94641489 | 94687490 + | NM_172683    | Pogz   | 10045 | 94651534 | 94651734 |
| 3 | 94641489 | 94687490 + | NM_172683    | Pogz   | -1342 | 94639947 | 94640147 |
| 3 | 94778653 | 94810860 + | NM_001293715 | Pi4kb  | 12906 | 94791559 | 94791759 |
| 3 | 94778653 | 94810860 + | NM_001293716 | Pi4kb  | 12906 | 94791559 | 94791759 |
| 3 | 94778653 | 94810860 + | NM_175356    | Pi4kb  | 12906 | 94791559 | 94791759 |

|   |          |            |              |          |       |          |          |
|---|----------|------------|--------------|----------|-------|----------|----------|
| 3 | 94862452 | 94910853 - | NM_001293707 | Pip5k1a  | 0     | 94910818 | 94911018 |
| 3 | 94862452 | 94910853 - | NM_008847    | Pip5k1a  | 0     | 94910818 | 94911018 |
| 3 | 94914964 | 94926974 + | NM_009336    | Vps72    | -3946 | 94910818 | 94911018 |
| 3 | 94985690 | 95021865 - | NM_029885    | Gabpb2   | 0     | 95021750 | 95021950 |
| 3 | 94985690 | 95021865 - | NM_029885    | Gabpb2   | -9943 | 95031808 | 95032008 |
| 3 | 94985690 | 95021865 - | NM_172512    | Gabpb2   | 0     | 95021750 | 95021950 |
| 3 | 94985690 | 95021865 - | NM_172512    | Gabpb2   | -9943 | 95031808 | 95032008 |
| 3 | 95021379 | 95030581 + | NR_108026    | Gm16740  | 371   | 95021750 | 95021950 |
| 3 | 95022466 | 95032600 - | NM_019914    | Mllt11   | 592   | 95031808 | 95032008 |
| 3 | 95032346 | 95040347 + | NM_172395    | Cdc42se1 | -338  | 95031808 | 95032008 |
| 3 | 95032865 | 95040347 + | NM_001038708 | Cdc42se1 | -857  | 95031808 | 95032008 |
| 3 | 95057596 | 95085999 - | NM_173347    | Prune    | 4610  | 95081189 | 95081389 |
| 3 | 95086857 | 95100087 + | NM_133858    | Fam63a   | -5468 | 95081189 | 95081389 |
| 3 | 95086857 | 95100087 + | NM_199475    | Fam63a   | -5468 | 95081189 | 95081389 |
| 3 | 95100016 | 95110727 - | NM_001085383 | Anxa9    | 8456  | 95102071 | 95102271 |
| 3 | 95100016 | 95111099 - | NM_023628    | Anxa9    | 8828  | 95102071 | 95102271 |
| 3 | 95303132 | 95313310 + | NM_007802    | Ctsk     | 4331  | 95307463 | 95307663 |
| 3 | 95330708 | 95360328 + | NM_001267695 | Ctss     | 16    | 95330724 | 95330924 |
| 3 | 95330708 | 95360328 + | NM_021281    | Ctss     | 16    | 95330724 | 95330924 |
| 3 | 95480125 | 95491841 - | NM_001301705 | Adamtsl4 | 7435  | 95484206 | 95484406 |
| 3 | 95480125 | 95491841 - | NM_144899    | Adamtsl4 | 7435  | 95484206 | 95484406 |
| 3 | 95538071 | 95543493 - | NM_001252653 | Ecm1     | -8575 | 95552068 | 95552268 |
| 3 | 95538071 | 95543493 - | NM_007899    | Ecm1     | -8575 | 95552068 | 95552268 |
| 3 | 95543897 | 95558901 - | NM_001163617 | Tars2    | 6633  | 95552068 | 95552268 |
| 3 | 95543897 | 95558901 - | NM_001163618 | Tars2    | 6633  | 95552068 | 95552268 |
| 3 | 95543897 | 95558901 - | NM_027931    | Tars2    | 6633  | 95552068 | 95552268 |
| 3 | 95547776 | 95558901 - | NM_001163619 | Tars2    | 6633  | 95552068 | 95552268 |
| 3 | 95563796 | 95622877 - | NM_001081293 | Rprd2    | 38021 | 95584656 | 95584856 |
| 3 | 95634545 | 95659677 - | NM_027541    | Prpf3    | 23424 | 95636053 | 95636253 |
| 3 | 95976429 | 95981488 + | NM_153053    | Sf3b4    | -298  | 95975931 | 95976131 |



|   |          |            |              |               |       |          |          |
|---|----------|------------|--------------|---------------|-------|----------|----------|
| 3 | 95985150 | 95999104 + | NM_022030    | Sv2a          | -9019 | 95975931 | 95976131 |
| 3 | 96359691 | 96370725 - | NR_040409    | Gm15441       | 9555  | 96360970 | 96361170 |
| 3 | 96361880 | 96365781 + | NM_001009935 | Txnip         | -710  | 96360970 | 96361170 |
| 3 | 96361880 | 96365781 + | NM_023719    | Txnip         | -710  | 96360970 | 96361170 |
| 3 | 96381795 | 96398105 - | NM_001293701 | Polr3gl       | 58    | 96397847 | 96398047 |
| 3 | 96381795 | 96398105 - | NM_001293701 | Polr3gl       | 13834 | 96384071 | 96384271 |
| 3 | 96381795 | 96398105 - | NM_027241    | Polr3gl       | 58    | 96397847 | 96398047 |
| 3 | 96381795 | 96398105 - | NM_027241    | Polr3gl       | 13834 | 96384071 | 96384271 |
| 3 | 96400559 | 96403702 + | NM_001024851 | Ankrd34a      | -2512 | 96397847 | 96398047 |
| 3 | 96405056 | 96429276 + | NM_001163170 | Lix1l         | -7009 | 96397847 | 96398047 |
| 3 | 96474054 | 96494958 + | NM_001081139 | Ankrd35       | 9293  | 96483347 | 96483547 |
| 3 | 96509815 | 96512484 - | NM_001162925 | Nudt17        | -326  | 96512810 | 96513010 |
| 3 | 96509815 | 96512484 - | NM_030094    | Nudt17        | -326  | 96512810 | 96513010 |
| 3 | 96515818 | 96531363 - | NM_028925    | Polr3c        | 2622  | 96528541 | 96528741 |
| 3 | 96531534 | 96595079 + | NM_026406    | Rnf115        | -2793 | 96528541 | 96528741 |
| 3 | 96602686 | 96633275 - | NM_001163496 | Cd160         | -3014 | 96636289 | 96636489 |
| 3 | 96602686 | 96633275 - | NM_001163496 | Cd160         | 5380  | 96627695 | 96627895 |
| 3 | 96602686 | 96633275 - | NM_001163497 | Cd160         | -3014 | 96636289 | 96636489 |
| 3 | 96602686 | 96633275 - | NM_001163497 | Cd160         | 5380  | 96627695 | 96627895 |
| 3 | 96602686 | 96618445 - | NM_018767    | Cd160         | -9250 | 96627695 | 96627895 |
| 3 | 96633749 | 96635994 - | NR_015596    | 4930442L01Rik | -295  | 96636289 | 96636489 |
| 3 | 96633988 | 96674850 + | NM_021517    | Pdzk1         | 2301  | 96636289 | 96636489 |
| 3 | 96633988 | 96674850 + | NM_021517    | Pdzk1         | -6093 | 96627695 | 96627895 |
| 3 | 96636597 | 96674850 + | NM_001146001 | Pdzk1         | -108  | 96636289 | 96636489 |
| 3 | 96636597 | 96674850 + | NM_001146001 | Pdzk1         | -8702 | 96627695 | 96627895 |
| 3 | 96674989 | 96709222 - | NM_026229    | Gpr89         | 2360  | 96706662 | 96706862 |
| 3 | 97007585 | 97031288 - | NM_029933    | Bcl9          | 15707 | 97015381 | 97015581 |
| 3 | 97364671 | 97414114 - | NM_026539    | Chd1l         | -4984 | 97419098 | 97419298 |
| 3 | 97432727 | 97459211 + | NM_001161763 | Fmo5          | -560  | 97431967 | 97432167 |
| 3 | 97432761 | 97459211 + | NM_001161765 | Fmo5          | -594  | 97431967 | 97432167 |

|   |           |             |              |         |        |           |           |
|---|-----------|-------------|--------------|---------|--------|-----------|-----------|
| 3 | 97432761  | 97459211 +  | NM_010232    | Fmo5    | -594   | 97431967  | 97432167  |
| 3 | 97493751  | 97692631 -  | NM_001289701 | Pde4dip | 126432 | 97565999  | 97566199  |
| 3 | 97493751  | 97692631 -  | NM_001289701 | Pde4dip | -9843  | 97702474  | 97702674  |
| 3 | 97493751  | 97692631 -  | NM_001289701 | Pde4dip | 56836  | 97635595  | 97635795  |
| 3 | 97493751  | 97692631 -  | NM_001289701 | Pde4dip | 120384 | 97572047  | 97572247  |
| 3 | 97493751  | 97692631 -  | NM_001289702 | Pde4dip | 126432 | 97565999  | 97566199  |
| 3 | 97493751  | 97692631 -  | NM_001289702 | Pde4dip | -9843  | 97702474  | 97702674  |
| 3 | 97493751  | 97692631 -  | NM_001289702 | Pde4dip | 56836  | 97635595  | 97635795  |
| 3 | 97493751  | 97692631 -  | NM_001289702 | Pde4dip | 120384 | 97572047  | 97572247  |
| 3 | 97493752  | 97692631 -  | NM_001039376 | Pde4dip | 126432 | 97565999  | 97566199  |
| 3 | 97493752  | 97692631 -  | NM_001039376 | Pde4dip | -9843  | 97702474  | 97702674  |
| 3 | 97493752  | 97692631 -  | NM_001039376 | Pde4dip | 56836  | 97635595  | 97635795  |
| 3 | 97493752  | 97692631 -  | NM_001039376 | Pde4dip | 120384 | 97572047  | 97572247  |
| 3 | 97542767  | 97571938 -  | NM_178080    | Pde4dip | 5739   | 97565999  | 97566199  |
| 3 | 97542767  | 97571938 -  | NM_178080    | Pde4dip | -109   | 97572047  | 97572247  |
| 3 | 97542767  | 97571938 -  | NR_110360    | Pde4dip | 5739   | 97565999  | 97566199  |
| 3 | 97542767  | 97571938 -  | NR_110360    | Pde4dip | -109   | 97572047  | 97572247  |
| 3 | 97705150  | 97726242 +  | NM_011342    | Sec22b  | -2476  | 97702474  | 97702674  |
| 3 | 97705150  | 97726242 +  | NM_011342    | Sec22b  | 2281   | 97707431  | 97707631  |
| 3 | 98117094  | 98143893 -  | NM_016966    | Phgdh   | 305    | 98143388  | 98143588  |
| 3 | 98945013  | 99024127 +  | NM_027462    | Wars2   | 302    | 98945315  | 98945515  |
| 3 | 98945013  | 99024127 +  | NM_027462    | Wars2   | 16604  | 98961617  | 98961817  |
| 3 | 99689340  | 99947246 +  | NM_028892    | Spag17  | 95687  | 99785027  | 99785227  |
| 3 | 100797452 | 100833419 - | NM_001167906 | Cd101   | 6176   | 100827043 | 100827243 |
| 3 | 100797452 | 100833419 - | NM_001167906 | Cd101   | 26986  | 100806233 | 100806433 |
| 3 | 100797452 | 100833419 - | NM_001167906 | Cd101   | 18730  | 100814489 | 100814689 |
| 3 | 100844159 | 100914090 - | NM_011197    | Ptgfrn  | 6614   | 100907276 | 100907476 |
| 3 | 100844159 | 100914090 - | NM_011197    | Ptgfrn  | 13678  | 100900212 | 100900412 |
| 3 | 101181048 | 101266984 + | NM_207205    | Igsf3   | 19092  | 101200140 | 101200340 |
| 3 | 101380142 | 101408631 - | NM_144900    | Atp1a1  | -1105  | 101409736 | 101409936 |

|   |           |             |              |         |       |           |           |
|---|-----------|-------------|--------------|---------|-------|-----------|-----------|
| 3 | 101616999 | 101640147 - | NM_172295    | Mab21l3 | -1140 | 101641287 | 101641487 |
| 3 | 101959823 | 102008617 - | NM_177545    | Vangl1  | 47715 | 101960702 | 101960902 |
| 3 | 102273842 | 102324937 + | NM_001112698 | Ngf     | 7394  | 102281236 | 102281436 |
| 3 | 102273842 | 102324937 + | NM_013609    | Ngf     | 7394  | 102281236 | 102281436 |
| 3 | 102743581 | 102768057 - | NM_198658    | Nr1h5   | 8175  | 102759682 | 102759882 |
| 3 | 102743581 | 102768057 - | NM_201619    | Nr1h5   | 8175  | 102759682 | 102759882 |
| 3 | 102743581 | 102768057 - | NM_201622    | Nr1h5   | 8175  | 102759682 | 102759882 |
| 3 | 103543738 | 103595487 - | NM_001301304 | Hipk1   | 34266 | 103561021 | 103561221 |
| 3 | 103543738 | 103595199 - | NM_001301306 | Hipk1   | 33978 | 103561021 | 103561221 |
| 3 | 103543738 | 103595199 - | NM_010432    | Hipk1   | 33978 | 103561021 | 103561221 |
| 3 | 103549079 | 103595485 - | NR_125731    | Hipk1   | 34264 | 103561021 | 103561221 |
| 3 | 103636619 | 103642572 + | NM_001142959 | Bcl2l15 | 1355  | 103637974 | 103638174 |
| 3 | 103636619 | 103642572 + | NM_001142959 | Bcl2l15 | 0     | 103636490 | 103636690 |
| 3 | 103636619 | 103658542 + | NM_001142960 | Bcl2l15 | 1355  | 103637974 | 103638174 |
| 3 | 103636619 | 103658542 + | NM_001142960 | Bcl2l15 | 0     | 103636490 | 103636690 |
| 3 | 103772033 | 103811415 + | NM_001163467 | Phtf1   | 12237 | 103784270 | 103784470 |
| 3 | 103772181 | 103811415 + | NM_001163468 | Phtf1   | 12089 | 103784270 | 103784470 |
| 3 | 103772181 | 103811415 + | NM_001163469 | Phtf1   | 12089 | 103784270 | 103784470 |
| 3 | 103772181 | 103811415 + | NM_013629    | Phtf1   | 12089 | 103784270 | 103784470 |
| 3 | 103817188 | 104024330 - | NM_001159354 | Magi3   | -6217 | 104030547 | 104030747 |
| 3 | 103817188 | 104024330 - | NM_001159354 | Magi3   | -1261 | 104025591 | 104025791 |
| 3 | 103817188 | 104024330 - | NM_001159354 | Magi3   | 30293 | 103993837 | 103994037 |
| 3 | 103817188 | 104024330 - | NM_133853    | Magi3   | -6217 | 104030547 | 104030747 |
| 3 | 103817188 | 104024330 - | NM_133853    | Magi3   | -1261 | 104025591 | 104025791 |
| 3 | 103817188 | 104024330 - | NM_133853    | Magi3   | 30293 | 103993837 | 103994037 |
| 3 | 104257906 | 104315842 - | NM_001025067 | Lrig2   | -7376 | 104323218 | 104323418 |
| 3 | 104257906 | 104315842 - | NM_001310698 | Lrig2   | -7376 | 104323218 | 104323418 |
| 3 | 104442587 | 104462386 + | NM_009196    | Slc16a1 | 4657  | 104447244 | 104447444 |
| 3 | 104570323 | 104580466 - | NM_183224    | Fam19a3 | -9619 | 104590085 | 104590285 |
| 3 | 104570323 | 104580466 - | NM_183224    | Fam19a3 | -5391 | 104585857 | 104586057 |

|   |           |             |              |               |       |           |           |
|---|-----------|-------------|--------------|---------------|-------|-----------|-----------|
| 3 | 104570323 | 104580466 - | NM_183224    | Fam19a3       | 7054  | 104573212 | 104573412 |
| 3 | 104583974 | 104588936 + | NM_027982    | Ppm1j         | 1883  | 104585857 | 104586057 |
| 3 | 104591952 | 104597378 + | NM_001291859 | Rhoc          | -1667 | 104590085 | 104590285 |
| 3 | 104591952 | 104597378 + | NM_001291859 | Rhoc          | 3976  | 104595928 | 104596128 |
| 3 | 104591952 | 104597378 + | NM_001291859 | Rhoc          | -5895 | 104585857 | 104586057 |
| 3 | 104591952 | 104597378 + | NM_007484    | Rhoc          | -1667 | 104590085 | 104590285 |
| 3 | 104591952 | 104597378 + | NM_007484    | Rhoc          | 3976  | 104595928 | 104596128 |
| 3 | 104591952 | 104597378 + | NM_007484    | Rhoc          | -5895 | 104585857 | 104586057 |
| 3 | 104597750 | 104621482 - | NM_001163440 | Mov10         | 21817 | 104599465 | 104599665 |
| 3 | 104597750 | 104621224 - | NM_001163441 | Mov10         | 21559 | 104599465 | 104599665 |
| 3 | 104597750 | 104621224 - | NM_008619    | Mov10         | 21559 | 104599465 | 104599665 |
| 3 | 105507517 | 105523761 + | NM_175398    | Fam212b       | 365   | 105507882 | 105508082 |
| 3 | 105508376 | 105523761 + | NM_001163356 | Fam212b       | -294  | 105507882 | 105508082 |
| 3 | 105530178 | 105604300 - | NM_145541    | Rap1a         | -6442 | 105610742 | 105610942 |
| 3 | 105530178 | 105604300 - | NM_145541    | Rap1a         | -7233 | 105611533 | 105611733 |
| 3 | 105530178 | 105604300 - | NM_145541    | Rap1a         | -5269 | 105609569 | 105609769 |
| 3 | 105618485 | 105620278 + | NR_045845    | Gm5547        | -7543 | 105610742 | 105610942 |
| 3 | 105618485 | 105620278 + | NR_045845    | Gm5547        | 0     | 105618464 | 105618664 |
| 3 | 105618485 | 105620278 + | NR_045845    | Gm5547        | -6752 | 105611533 | 105611733 |
| 3 | 105618485 | 105620278 + | NR_045845    | Gm5547        | -8716 | 105609569 | 105609769 |
| 3 | 106986061 | 106998640 + | NM_001081140 | Kcna10        | 10212 | 106996273 | 106996473 |
| 3 | 107014213 | 107024651 - | NM_001111143 | Cym           | 4979  | 107019472 | 107019672 |
| 3 | 107014213 | 107024651 - | NM_001111143 | Cym           | -9073 | 107033724 | 107033924 |
| 3 | 107033532 | 107036950 + | NM_001256174 | A630076J17Rik | 192   | 107033724 | 107033924 |
| 3 | 107129028 | 107136208 - | NM_001045807 | Rbm15         | -2770 | 107138978 | 107139178 |
| 3 | 107129028 | 107136208 - | NM_001045807 | Rbm15         | 2059  | 107133949 | 107134149 |
| 3 | 107466038 | 107499467 - | NM_145542    | Ahcyl1        | 4947  | 107494320 | 107494520 |
| 3 | 107543966 | 107563388 - | NM_001113529 | Csf1          | -8291 | 107571679 | 107571879 |
| 3 | 107543966 | 107563388 - | NM_001113529 | Csf1          | 3539  | 107559649 | 107559849 |
| 3 | 107543966 | 107563388 - | NM_007778    | Csf1          | -8291 | 107571679 | 107571879 |

|   |           |             |              |               |       |           |           |
|---|-----------|-------------|--------------|---------------|-------|-----------|-----------|
| 3 | 107543966 | 107563388 - | NM_007778    | Csf1          | 3539  | 107559649 | 107559849 |
| 3 | 107548513 | 107563388 - | NM_001113530 | Csf1          | -8291 | 107571679 | 107571879 |
| 3 | 107548513 | 107563388 - | NM_001113530 | Csf1          | 3539  | 107559649 | 107559849 |
| 3 | 107680148 | 107695819 + | NM_133867    | Eps8l3        | 559   | 107680707 | 107680907 |
| 3 | 107680148 | 107695819 + | NM_133867    | Eps8l3        | -2112 | 107677836 | 107678036 |
| 3 | 107680148 | 107695819 + | NM_133867    | Eps8l3        | -4496 | 107675452 | 107675652 |
| 3 | 107691768 | 107699132 - | NR_015459    | 4933431E20Rik | -3390 | 107702522 | 107702722 |
| 3 | 107766614 | 107772093 - | NM_010359    | Gstm3         | -5242 | 107777335 | 107777535 |
| 3 | 107766614 | 107772093 - | NM_010359    | Gstm3         | -8635 | 107780728 | 107780928 |
| 3 | 107766614 | 107772093 - | NM_010359    | Gstm3         | 3783  | 107768110 | 107768310 |
| 3 | 107784620 | 107789355 - | NM_008183    | Gstm2         | 3480  | 107785675 | 107785875 |
| 3 | 107910193 | 107949071 - | NM_010306    | Gnai3         | 21641 | 107927230 | 107927430 |
| 3 | 107910193 | 107949071 - | NM_010306    | Gnai3         | 4099  | 107944772 | 107944972 |
| 3 | 107910193 | 107949071 - | NM_010306    | Gnai3         | 15898 | 107932973 | 107933173 |
| 3 | 107910193 | 107949071 - | NM_010306    | Gnai3         | 33231 | 107915640 | 107915840 |
| 3 | 108086982 | 108164438 + | NM_001271599 | Sort1         | 20832 | 108107814 | 108108014 |
| 3 | 108086982 | 108164438 + | NM_019972    | Sort1         | 20832 | 108107814 | 108108014 |
| 3 | 108260987 | 108339441 - | NM_001033304 | 5330417C22Rik | 2639  | 108336602 | 108336802 |
| 3 | 108340502 | 108347616 + | NM_029314    | 1700013F07Rik | -3700 | 108336602 | 108336802 |
| 3 | 108481556 | 108525218 - | NM_029522    | Gpsm2         | 7199  | 108517819 | 108518019 |
| 3 | 108542576 | 108585228 + | NM_177859    | Aknad1        | 5176  | 108547752 | 108547952 |
| 3 | 108542576 | 108585228 + | NM_177859    | Aknad1        | 18000 | 108560576 | 108560776 |
| 3 | 108596098 | 108643421 - | NM_011504    | Stxbp3        | 2818  | 108640403 | 108640603 |
| 3 | 108656596 | 108692927 - | NM_001165965 | Fndc7         | -2978 | 108695905 | 108696105 |
| 3 | 108656596 | 108692927 - | NM_177091    | Fndc7         | -2978 | 108695905 | 108696105 |
| 3 | 108705725 | 108714623 - | NM_025845    | Prpf38b       | -7730 | 108722353 | 108722553 |
| 3 | 108773915 | 108830526 - | NM_001163567 | Fam102b       | -4175 | 108834701 | 108834901 |
| 3 | 108926067 | 108971328 + | NM_172685    | Slc25a24      | 7273  | 108933340 | 108933540 |
| 3 | 108926067 | 108971328 + | NM_172685    | Slc25a24      | 27686 | 108953753 | 108953953 |
| 3 | 108926067 | 108971328 + | NM_172685    | Slc25a24      | 13752 | 108939819 | 108940019 |

|   |           |             |              |               |        |           |           |
|---|-----------|-------------|--------------|---------------|--------|-----------|-----------|
| 3 | 108926067 | 108971328 + | NM_172685    | Slc25a24      | -5709  | 108920158 | 108920358 |
| 3 | 109143601 | 109488613 + | NM_020505    | Vav3          | 260461 | 109404062 | 109404262 |
| 3 | 109143601 | 109488613 + | NM_020505    | Vav3          | 228226 | 109371827 | 109372027 |
| 3 | 109376925 | 109488613 + | NM_146139    | Vav3          | 27137  | 109404062 | 109404262 |
| 3 | 109376925 | 109488613 + | NM_146139    | Vav3          | -4898  | 109371827 | 109372027 |
| 3 | 115975471 | 116126951 - | NM_001080818 | Cdc14a        | 34851  | 116091900 | 116092100 |
| 3 | 115975471 | 116126951 - | NM_001080818 | Cdc14a        | 36834  | 116089917 | 116090117 |
| 3 | 115975471 | 116126951 - | NM_001080818 | Cdc14a        | 87834  | 116038917 | 116039117 |
| 3 | 115975471 | 116126951 - | NM_001173553 | Cdc14a        | 34851  | 116091900 | 116092100 |
| 3 | 115975471 | 116126951 - | NM_001173553 | Cdc14a        | 36834  | 116089917 | 116090117 |
| 3 | 115975471 | 116126951 - | NM_001173553 | Cdc14a        | 87834  | 116038917 | 116039117 |
| 3 | 116284254 | 116317506 - | NM_030016    | Trmt13        | 16817  | 116300489 | 116300689 |
| 3 | 116297876 | 116333905 + | NM_001289568 | Sass6         | 2613   | 116300489 | 116300689 |
| 3 | 116297876 | 116333905 + | NM_001289571 | Sass6         | 2613   | 116300489 | 116300689 |
| 3 | 116297876 | 116333905 + | NM_028349    | Sass6         | 2613   | 116300489 | 116300689 |
| 3 | 117484415 | 117571855 - | NM_001190156 | Snx7          | -9467  | 117581322 | 117581522 |
| 3 | 117484415 | 117571855 - | NM_029655    | Snx7          | -9467  | 117581322 | 117581522 |
| 3 | 118265096 | 119135837 + | NM_170778    | Dpyd          | 28758  | 118293854 | 118294054 |
| 3 | 118265096 | 119135837 + | NM_170778    | Dpyd          | 149413 | 118414509 | 118414709 |
| 3 | 118265096 | 119135837 + | NM_170778    | Dpyd          | 100665 | 118365761 | 118365961 |
| 3 | 118265096 | 119135837 + | NM_170778    | Dpyd          | 32795  | 118297891 | 118298091 |
| 3 | 118265096 | 119135837 + | NM_170778    | Dpyd          | 4926   | 118270022 | 118270222 |
| 3 | 120994735 | 121064930 + | NM_024178    | Alg14         | 54704  | 121049439 | 121049639 |
| 3 | 121162446 | 121235263 - | NM_145394    | Slc44a3       | 31328  | 121203735 | 121203935 |
| 3 | 121337856 | 121346404 - | NR_036456    | A730020M07Rik | -6532  | 121352936 | 121353136 |
| 3 | 121340044 | 121346404 - | NR_036457    | A730020M07Rik | -6532  | 121352936 | 121353136 |
| 3 | 121340044 | 121349372 - | NR_036458    | A730020M07Rik | -3564  | 121352936 | 121353136 |
| 3 | 121373681 | 121385901 + | NM_001033814 | 4930432M17Rik | 504    | 121374185 | 121374385 |
| 3 | 121426455 | 121437971 + | NM_010171    | F3            | -7409  | 121418846 | 121419046 |
| 3 | 121426455 | 121437971 + | NM_010171    | F3            | 576    | 121427031 | 121427231 |

|   |           |             |              |               |       |           |           |
|---|-----------|-------------|--------------|---------------|-------|-----------|-----------|
| 3 | 121426455 | 121437971 + | NM_010171    | F3            | -5416 | 121420839 | 121421039 |
| 3 | 121426455 | 121437971 + | NM_010171    | F3            | -9937 | 121416318 | 121416518 |
| 3 | 121426455 | 121437971 + | NM_010171    | F3            | -8891 | 121417364 | 121417564 |
| 3 | 121461828 | 121518134 - | NM_008991    | Abcd3         | -4583 | 121522717 | 121522917 |
| 3 | 121461828 | 121518134 - | NM_008991    | Abcd3         | 1682  | 121516252 | 121516452 |
| 3 | 121461828 | 121518134 - | NM_008991    | Abcd3         | 12053 | 121505881 | 121506081 |
| 3 | 121948475 | 121970134 + | NM_008129    | Gclm          | 7427  | 121955902 | 121956102 |
| 3 | 122122698 | 122233101 + | NM_013867    | Bcar3         | 0     | 122122642 | 122122842 |
| 3 | 122122698 | 122233101 + | NM_013867    | Bcar3         | 54965 | 122177663 | 122177863 |
| 3 | 122122698 | 122233101 + | NM_013867    | Bcar3         | 93342 | 122216040 | 122216240 |
| 3 | 122122698 | 122233101 + | NM_013867    | Bcar3         | 96359 | 122219057 | 122219257 |
| 3 | 122122698 | 122233101 + | NM_013867    | Bcar3         | 92054 | 122214752 | 122214952 |
| 3 | 122122698 | 122233101 + | NM_013867    | Bcar3         | 90727 | 122213425 | 122213625 |
| 3 | 122122698 | 122233101 + | NM_013867    | Bcar3         | 46197 | 122168895 | 122169095 |
| 3 | 122122698 | 122233101 + | NM_013867    | Bcar3         | 54329 | 122177027 | 122177227 |
| 3 | 122122698 | 122233101 + | NM_013867    | Bcar3         | 51250 | 122173948 | 122174148 |
| 3 | 122122698 | 122233101 + | NM_013867    | Bcar3         | 7682  | 122130380 | 122130580 |
| 3 | 122122698 | 122233101 + | NM_013867    | Bcar3         | 8656  | 122131354 | 122131554 |
| 3 | 122122698 | 122233101 + | NM_013867    | Bcar3         | 4007  | 122126705 | 122126905 |
| 3 | 122241637 | 122322633 - | NM_001114665 | Fnbp1l        | 16745 | 122305688 | 122305888 |
| 3 | 122241637 | 122322633 - | NM_001114665 | Fnbp1l        | -654  | 122323287 | 122323487 |
| 3 | 122241637 | 122322633 - | NM_001114665 | Fnbp1l        | 29645 | 122292788 | 122292988 |
| 3 | 122241637 | 122322633 - | NM_153118    | Fnbp1l        | 16745 | 122305688 | 122305888 |
| 3 | 122241637 | 122322633 - | NM_153118    | Fnbp1l        | -654  | 122323287 | 122323487 |
| 3 | 122241637 | 122322633 - | NM_153118    | Fnbp1l        | 29645 | 122292788 | 122292988 |
| 3 | 122432076 | 122562293 + | NM_153422    | Pde5a         | 48505 | 122480581 | 122480781 |
| 3 | 122585510 | 122627035 - | NR_046036    | 4933405D12Rik | 35149 | 122591686 | 122591886 |
| 3 | 122585510 | 122627035 - | NR_046036    | 4933405D12Rik | 28711 | 122598124 | 122598324 |
| 3 | 122585510 | 122627035 - | NR_046036    | 4933405D12Rik | 33983 | 122592852 | 122593052 |
| 3 | 122585510 | 122627035 - | NR_046036    | 4933405D12Rik | 36234 | 122590601 | 122590801 |

|   |           |             |              |        |        |           |           |
|---|-----------|-------------|--------------|--------|--------|-----------|-----------|
| 3 | 122597990 | 122602425 + | NM_007980    | Fabp2  | -6104  | 122591686 | 122591886 |
| 3 | 122597990 | 122602425 + | NM_007980    | Fabp2  | 134    | 122598124 | 122598324 |
| 3 | 122597990 | 122602425 + | NM_007980    | Fabp2  | -4938  | 122592852 | 122593052 |
| 3 | 122597990 | 122602425 + | NM_007980    | Fabp2  | -7189  | 122590601 | 122590801 |
| 3 | 122636519 | 122687366 - | NM_133857    | Usp53  | -1885  | 122689251 | 122689451 |
| 3 | 122709124 | 122737906 - | NM_021503    | Myoz2  | -4289  | 122742195 | 122742395 |
| 3 | 122779437 | 122939068 - | NM_080451    | Synpo2 | 99839  | 122839029 | 122839229 |
| 3 | 122779437 | 122939068 - | NM_080451    | Synpo2 | 157459 | 122781409 | 122781609 |
| 3 | 122970414 | 123068555 + | NM_027135    | Sec24d | 49778  | 123020192 | 123020392 |
| 3 | 122970414 | 123068555 + | NM_027135    | Sec24d | 15768  | 122986182 | 122986382 |
| 3 | 123149831 | 123209521 + | NM_008939    | Prss12 | 32857  | 123182688 | 123182888 |
| 3 | 123149831 | 123209521 + | NM_008939    | Prss12 | -7204  | 123142427 | 123142627 |
| 3 | 126299869 | 126549245 + | NM_001025438 | Camk2d | 14876  | 126314745 | 126314945 |
| 3 | 126299869 | 126549245 + | NM_001025438 | Camk2d | 139285 | 126439154 | 126439354 |
| 3 | 126299869 | 126549245 + | NM_001025438 | Camk2d | 94123  | 126393992 | 126394192 |
| 3 | 126299869 | 126549245 + | NM_001025438 | Camk2d | 12854  | 126312723 | 126312923 |
| 3 | 126299869 | 126549245 + | NM_001025439 | Camk2d | 14876  | 126314745 | 126314945 |
| 3 | 126299869 | 126549245 + | NM_001025439 | Camk2d | 139285 | 126439154 | 126439354 |
| 3 | 126299869 | 126549245 + | NM_001025439 | Camk2d | 94123  | 126393992 | 126394192 |
| 3 | 126299869 | 126549245 + | NM_001025439 | Camk2d | 12854  | 126312723 | 126312923 |
| 3 | 126299869 | 126549245 + | NM_001293663 | Camk2d | 14876  | 126314745 | 126314945 |
| 3 | 126299869 | 126549245 + | NM_001293663 | Camk2d | 139285 | 126439154 | 126439354 |
| 3 | 126299869 | 126549245 + | NM_001293663 | Camk2d | 94123  | 126393992 | 126394192 |
| 3 | 126299869 | 126549245 + | NM_001293663 | Camk2d | 12854  | 126312723 | 126312923 |
| 3 | 126299869 | 126549245 + | NM_001293664 | Camk2d | 14876  | 126314745 | 126314945 |
| 3 | 126299869 | 126549245 + | NM_001293664 | Camk2d | 139285 | 126439154 | 126439354 |
| 3 | 126299869 | 126549245 + | NM_001293664 | Camk2d | 94123  | 126393992 | 126394192 |
| 3 | 126299869 | 126549245 + | NM_001293664 | Camk2d | 12854  | 126312723 | 126312923 |
| 3 | 126299869 | 126549245 + | NM_001293665 | Camk2d | 14876  | 126314745 | 126314945 |
| 3 | 126299869 | 126549245 + | NM_001293665 | Camk2d | 139285 | 126439154 | 126439354 |



|   |           |             |              |               |        |           |           |
|---|-----------|-------------|--------------|---------------|--------|-----------|-----------|
| 3 | 126299869 | 126549245 + | NM_001293665 | Camk2d        | 94123  | 126393992 | 126394192 |
| 3 | 126299869 | 126549245 + | NM_001293665 | Camk2d        | 12854  | 126312723 | 126312923 |
| 3 | 126299869 | 126521717 + | NM_001293666 | Camk2d        | 14876  | 126314745 | 126314945 |
| 3 | 126299869 | 126521717 + | NM_001293666 | Camk2d        | 139285 | 126439154 | 126439354 |
| 3 | 126299869 | 126521717 + | NM_001293666 | Camk2d        | 94123  | 126393992 | 126394192 |
| 3 | 126299869 | 126521717 + | NM_001293666 | Camk2d        | 12854  | 126312723 | 126312923 |
| 3 | 126299869 | 126549245 + | NM_023813    | Camk2d        | 14876  | 126314745 | 126314945 |
| 3 | 126299869 | 126549245 + | NM_023813    | Camk2d        | 139285 | 126439154 | 126439354 |
| 3 | 126299869 | 126549245 + | NM_023813    | Camk2d        | 94123  | 126393992 | 126394192 |
| 3 | 126299869 | 126549245 + | NM_023813    | Camk2d        | 12854  | 126312723 | 126312923 |
| 3 | 127373228 | 127483446 - | NM_027808    | Alpk1         | -8261  | 127491707 | 127491907 |
| 3 | 127373228 | 127483446 - | NM_027808    | Alpk1         | -7597  | 127491043 | 127491243 |
| 3 | 127492831 | 127501308 + | NM_145133    | Tifa          | -924   | 127491707 | 127491907 |
| 3 | 127492831 | 127501308 + | NM_145133    | Tifa          | -1588  | 127491043 | 127491243 |
| 3 | 127819933 | 127934524 - | NR_045704    | D030025E07Rik | 43677  | 127890647 | 127890847 |
| 3 | 128972095 | 129035668 - | NM_007934    | Enpep         | 0      | 129035666 | 129035866 |
| 3 | 128972095 | 129035668 - | NM_007934    | Enpep         | 1080   | 129034388 | 129034588 |
| 3 | 129235304 | 129341412 + | NM_130450    | Elovl6        | 25341  | 129260645 | 129260845 |
| 3 | 129235304 | 129341412 + | NM_130450    | Elovl6        | 63612  | 129298916 | 129299116 |
| 3 | 129235304 | 129341412 + | NM_130450    | Elovl6        | 82615  | 129317919 | 129318119 |
| 3 | 129235304 | 129341412 + | NM_130450    | Elovl6        | 78510  | 129313814 | 129314014 |
| 3 | 129235304 | 129341412 + | NM_130450    | Elovl6        | 39449  | 129274753 | 129274953 |
| 3 | 129235304 | 129341412 + | NM_130450    | Elovl6        | 46442  | 129281746 | 129281946 |
| 3 | 129235304 | 129341412 + | NM_130450    | Elovl6        | 33168  | 129268472 | 129268672 |
| 3 | 129235304 | 129341412 + | NM_130450    | Elovl6        | 15505  | 129250809 | 129251009 |
| 3 | 129380495 | 129428005 - | NM_001310737 | Egf           | -52    | 129428057 | 129428257 |
| 3 | 129380495 | 129458241 - | NM_010113    | Egf           | 29984  | 129428057 | 129428257 |
| 3 | 129604333 | 129617031 + | NM_009811    | Casp6         | 1104   | 129605437 | 129605637 |
| 3 | 129883763 | 130302802 + | NM_001244952 | Col25a1       | 38854  | 129922617 | 129922817 |
| 3 | 129883763 | 130302802 + | NM_001244952 | Col25a1       | 92611  | 129976374 | 129976574 |

|   |           |             |              |         |        |           |           |
|---|-----------|-------------|--------------|---------|--------|-----------|-----------|
| 3 | 129883763 | 130302802 + | NM_001244952 | Col25a1 | 74979  | 129958742 | 129958942 |
| 3 | 129883763 | 130302802 + | NM_001244952 | Col25a1 | 36613  | 129920376 | 129920576 |
| 3 | 129883763 | 130302802 + | NM_029838    | Col25a1 | 38854  | 129922617 | 129922817 |
| 3 | 129883763 | 130302802 + | NM_029838    | Col25a1 | 92611  | 129976374 | 129976574 |
| 3 | 129883763 | 130302802 + | NM_029838    | Col25a1 | 74979  | 129958742 | 129958942 |
| 3 | 129883763 | 130302802 + | NM_029838    | Col25a1 | 36613  | 129920376 | 129920576 |
| 3 | 129883763 | 130302802 + | NM_198711    | Col25a1 | 38854  | 129922617 | 129922817 |
| 3 | 129883763 | 130302802 + | NM_198711    | Col25a1 | 92611  | 129976374 | 129976574 |
| 3 | 129883763 | 130302802 + | NM_198711    | Col25a1 | 74979  | 129958742 | 129958942 |
| 3 | 129883763 | 130302802 + | NM_198711    | Col25a1 | 36613  | 129920376 | 129920576 |
| 3 | 130936338 | 130975020 - | NM_008212    | Hadh    | 16214  | 130958606 | 130958806 |
| 3 | 130936338 | 130975020 - | NM_008212    | Hadh    | 740    | 130974080 | 130974280 |
| 3 | 130993409 | 131006146 - | NM_027816    | Cyp2u1  | -9119  | 131015265 | 131015465 |
| 3 | 130993409 | 131006146 - | NM_027816    | Cyp2u1  | 2742   | 131003204 | 131003404 |
| 3 | 130993409 | 131006146 - | NM_027816    | Cyp2u1  | -7372  | 131013518 | 131013718 |
| 3 | 130993409 | 131006146 - | NM_027816    | Cyp2u1  | -3109  | 131009255 | 131009455 |
| 3 | 130993409 | 131006146 - | NM_027816    | Cyp2u1  | 10537  | 130995409 | 130995609 |
| 3 | 131021904 | 131047842 - | NM_028943    | Sgms2   | -4173  | 131052015 | 131052215 |
| 3 | 131021904 | 131047842 - | NM_028943    | Sgms2   | -3510  | 131051352 | 131051552 |
| 3 | 132293155 | 132307614 + | NM_001270430 | Gm5549  | 6997   | 132300152 | 132300352 |
| 3 | 132293155 | 132307614 + | NM_001270430 | Gm5549  | -388   | 132292567 | 132292767 |
| 3 | 132323462 | 132346844 - | NM_007926    | Aimp1   | 6051   | 132340593 | 132340793 |
| 3 | 132347108 | 132504653 + | NM_001163455 | Tbck    | 130681 | 132477789 | 132477989 |
| 3 | 132347108 | 132504653 + | NM_001163455 | Tbck    | 37100  | 132384208 | 132384408 |
| 3 | 132347108 | 132504653 + | NM_001163455 | Tbck    | -6315  | 132340593 | 132340793 |
| 3 | 132505166 | 132541561 - | NR_102297    | Gm29811 | 34357  | 132507004 | 132507204 |
| 3 | 132505166 | 132541561 - | NR_102298    | Gm29811 | 34357  | 132507004 | 132507204 |
| 3 | 132973074 | 133041200 + | NM_001293641 | Ppa2    | 29073  | 133002147 | 133002347 |
| 3 | 132973074 | 133041200 + | NM_001293641 | Ppa2    | 7026   | 132980100 | 132980300 |
| 3 | 132973074 | 133041200 + | NM_146141    | Ppa2    | 29073  | 133002147 | 133002347 |

|   |           |             |              |               |        |           |           |
|---|-----------|-------------|--------------|---------------|--------|-----------|-----------|
| 3 | 132973074 | 133041200 + | NM_146141    | Ppa2          | 7026   | 132980100 | 132980300 |
| 3 | 133126641 | 133207355 - | NM_001040400 | Tet2          | 27927  | 133179228 | 133179428 |
| 3 | 133126641 | 133207355 - | NM_001040400 | Tet2          | 29852  | 133177303 | 133177503 |
| 3 | 134875527 | 134936505 + | NM_173762    | Cenpe         | 20098  | 134895625 | 134895825 |
| 3 | 135011001 | 135060792 + | NM_028946    | Slc9b1        | 48245  | 135059246 | 135059446 |
| 3 | 135148575 | 135234368 + | NM_027288    | Manba         | 48628  | 135197203 | 135197403 |
| 3 | 135148575 | 135234368 + | NM_027288    | Manba         | 53563  | 135202138 | 135202338 |
| 3 | 135148575 | 135234368 + | NM_027288    | Manba         | 13324  | 135161899 | 135162099 |
| 3 | 135247619 | 135354512 - | NM_008689    | Nfkb1         | 1948   | 135352364 | 135352564 |
| 3 | 135247619 | 135354512 - | NM_008689    | Nfkb1         | 59406  | 135294906 | 135295106 |
| 3 | 135247619 | 135354512 - | NM_008689    | Nfkb1         | 3369   | 135350943 | 135351143 |
| 3 | 135488243 | 135551537 + | NM_026228    | Slc39a8       | 25968  | 135514211 | 135514411 |
| 3 | 135488243 | 135551537 + | NM_026228    | Slc39a8       | 19627  | 135507870 | 135508070 |
| 3 | 135488243 | 135551537 + | NM_026228    | Slc39a8       | 265    | 135488508 | 135488708 |
| 3 | 135488621 | 135551537 + | NM_001135149 | Slc39a8       | 25590  | 135514211 | 135514411 |
| 3 | 135488621 | 135551537 + | NM_001135149 | Slc39a8       | 19249  | 135507870 | 135508070 |
| 3 | 135488621 | 135551537 + | NM_001135149 | Slc39a8       | 0      | 135488508 | 135488708 |
| 3 | 135488754 | 135551537 + | NM_001135150 | Slc39a8       | 25457  | 135514211 | 135514411 |
| 3 | 135488754 | 135551537 + | NM_001135150 | Slc39a8       | 19116  | 135507870 | 135508070 |
| 3 | 135488754 | 135551537 + | NM_001135150 | Slc39a8       | -46    | 135488508 | 135488708 |
| 3 | 135496658 | 135503234 - | NR_040540    | 4933401H06Rik | -4636  | 135507870 | 135508070 |
| 3 | 136333030 | 136600692 + | NM_001293622 | Ppp3ca        | 202557 | 136535587 | 136535787 |
| 3 | 136333030 | 136600692 + | NM_001293622 | Ppp3ca        | -519   | 136332311 | 136332511 |
| 3 | 136333030 | 136600692 + | NM_001293622 | Ppp3ca        | 183728 | 136516758 | 136516958 |
| 3 | 136333030 | 136600692 + | NM_001293622 | Ppp3ca        | 91355  | 136424385 | 136424585 |
| 3 | 136333030 | 136600692 + | NM_008913    | Ppp3ca        | 202557 | 136535587 | 136535787 |
| 3 | 136333030 | 136600692 + | NM_008913    | Ppp3ca        | -519   | 136332311 | 136332511 |
| 3 | 136333030 | 136600692 + | NM_008913    | Ppp3ca        | 183728 | 136516758 | 136516958 |
| 3 | 136333030 | 136600692 + | NM_008913    | Ppp3ca        | 91355  | 136424385 | 136424585 |
| 3 | 137593971 | 137644514 - | NM_001310753 | Dapp1         | 12156  | 137632158 | 137632358 |

|   |           |             |              |         |       |           |           |
|---|-----------|-------------|--------------|---------|-------|-----------|-----------|
| 3 | 137593971 | 137644514 - | NM_001310753 | Dapp1   | 960   | 137643354 | 137643554 |
| 3 | 137593971 | 137644514 - | NM_001310753 | Dapp1   | 2966  | 137641348 | 137641548 |
| 3 | 137593971 | 137644514 - | NM_001310753 | Dapp1   | 6995  | 137637319 | 137637519 |
| 3 | 137593971 | 137644514 - | NM_001310753 | Dapp1   | 37486 | 137606828 | 137607028 |
| 3 | 137593971 | 137644514 - | NM_001310753 | Dapp1   | 40462 | 137603852 | 137604052 |
| 3 | 137593971 | 137644514 - | NM_011932    | Dapp1   | 12156 | 137632158 | 137632358 |
| 3 | 137593971 | 137644514 - | NM_011932    | Dapp1   | 960   | 137643354 | 137643554 |
| 3 | 137593971 | 137644514 - | NM_011932    | Dapp1   | 2966  | 137641348 | 137641548 |
| 3 | 137593971 | 137644514 - | NM_011932    | Dapp1   | 6995  | 137637319 | 137637519 |
| 3 | 137593971 | 137644514 - | NM_011932    | Dapp1   | 37486 | 137606828 | 137607028 |
| 3 | 137593971 | 137644514 - | NM_011932    | Dapp1   | 40462 | 137603852 | 137604052 |
| 3 | 137752819 | 137806353 - | NM_001163457 | Mttp    | 22890 | 137783263 | 137783463 |
| 3 | 137752819 | 137806353 - | NM_001163457 | Mttp    | 9650  | 137796503 | 137796703 |
| 3 | 137752819 | 137806353 - | NM_001163457 | Mttp    | 8610  | 137797543 | 137797743 |
| 3 | 137752819 | 137806353 - | NM_001163457 | Mttp    | 15300 | 137790853 | 137791053 |
| 3 | 137752819 | 137806353 - | NM_001163457 | Mttp    | 21618 | 137784535 | 137784735 |
| 3 | 137752819 | 137794342 - | NM_008642    | Mttp    | 10879 | 137783263 | 137783463 |
| 3 | 137752819 | 137794342 - | NM_008642    | Mttp    | -2161 | 137796503 | 137796703 |
| 3 | 137752819 | 137794342 - | NM_008642    | Mttp    | -3201 | 137797543 | 137797743 |
| 3 | 137752819 | 137794342 - | NM_008642    | Mttp    | 3289  | 137790853 | 137791053 |
| 3 | 137752819 | 137794342 - | NM_008642    | Mttp    | 9607  | 137784535 | 137784735 |
| 3 | 137806502 | 137822785 + | NM_175389    | Trmt10a | -9799 | 137796503 | 137796703 |
| 3 | 137806502 | 137822785 + | NM_175389    | Trmt10a | -8759 | 137797543 | 137797743 |
| 3 | 137940609 | 137953656 + | NM_007409    | Adh1    | -105  | 137940304 | 137940504 |
| 3 | 137940609 | 137953656 + | NM_007409    | Adh1    | -451  | 137939958 | 137940158 |
| 3 | 137976250 | 137994099 + | NM_026945    | Adh6a   | 15343 | 137991593 | 137991793 |
| 3 | 137976250 | 137994099 + | NM_026945    | Adh6a   | -7    | 137976043 | 137976243 |
| 3 | 137976250 | 137994099 + | NM_026945    | Adh6a   | -6777 | 137969273 | 137969473 |
| 3 | 138078461 | 138093857 + | NM_011996    | Adh4    | 15183 | 138093644 | 138093844 |
| 3 | 138100164 | 138118464 + | NM_001288578 | Adh5    | -6320 | 138093644 | 138093844 |

|   |           |             |              |               |        |           |           |
|---|-----------|-------------|--------------|---------------|--------|-----------|-----------|
| 3 | 138189155 | 138220564 + | NM_007917    | Eif4e         | -9998  | 138178957 | 138179157 |
| 3 | 138189155 | 138220564 + | NM_007917    | Eif4e         | 9762   | 138198917 | 138199117 |
| 3 | 138374499 | 138389949 - | NR_040545    | 4930425O10Rik | 14810  | 138374939 | 138375139 |
| 3 | 138405172 | 138567398 + | NM_019571    | Tspan5        | -2940  | 138402032 | 138402232 |
| 3 | 138405172 | 138567398 + | NM_019571    | Tspan5        | 144194 | 138549366 | 138549566 |
| 3 | 138405172 | 138567398 + | NM_019571    | Tspan5        | 927    | 138406099 | 138406299 |
| 3 | 138405172 | 138567398 + | NR_121195    | Tspan5        | -2940  | 138402032 | 138402232 |
| 3 | 138405172 | 138567398 + | NR_121195    | Tspan5        | 144194 | 138549366 | 138549566 |
| 3 | 138405172 | 138567398 + | NR_121195    | Tspan5        | 927    | 138406099 | 138406299 |
| 3 | 138588861 | 138738166 - | NM_001040690 | Rap1gds1      | 38613  | 138699353 | 138699553 |
| 3 | 138588861 | 138738166 - | NM_001040690 | Rap1gds1      | 38948  | 138699018 | 138699218 |
| 3 | 138588861 | 138738166 - | NM_001040690 | Rap1gds1      | 67659  | 138670307 | 138670507 |
| 3 | 138588861 | 138738166 - | NM_001286759 | Rap1gds1      | 38613  | 138699353 | 138699553 |
| 3 | 138588861 | 138738166 - | NM_001286759 | Rap1gds1      | 38948  | 138699018 | 138699218 |
| 3 | 138588861 | 138738166 - | NM_001286759 | Rap1gds1      | 67659  | 138670307 | 138670507 |
| 3 | 138588861 | 138738166 - | NM_145544    | Rap1gds1      | 38613  | 138699353 | 138699553 |
| 3 | 138588861 | 138738166 - | NM_145544    | Rap1gds1      | 38948  | 138699018 | 138699218 |
| 3 | 138588861 | 138738166 - | NM_145544    | Rap1gds1      | 67659  | 138670307 | 138670507 |
| 3 | 141902549 | 142058661 - | NM_001190852 | Pdlim5        | 55619  | 142002842 | 142003042 |
| 3 | 141902549 | 142058661 - | NM_001190852 | Pdlim5        | 9726   | 142048735 | 142048935 |
| 3 | 141902549 | 142058661 - | NM_001190852 | Pdlim5        | 49953  | 142008508 | 142008708 |
| 3 | 141902549 | 142058661 - | NM_001190852 | Pdlim5        | 56087  | 142002374 | 142002574 |
| 3 | 141902549 | 142058661 - | NM_001190852 | Pdlim5        | 118684 | 141939777 | 141939977 |
| 3 | 141902549 | 142058661 - | NM_001190854 | Pdlim5        | 55619  | 142002842 | 142003042 |
| 3 | 141902549 | 142058661 - | NM_001190854 | Pdlim5        | 9726   | 142048735 | 142048935 |
| 3 | 141902549 | 142058661 - | NM_001190854 | Pdlim5        | 49953  | 142008508 | 142008708 |
| 3 | 141902549 | 142058661 - | NM_001190854 | Pdlim5        | 56087  | 142002374 | 142002574 |
| 3 | 141902549 | 142058661 - | NM_001190854 | Pdlim5        | 118684 | 141939777 | 141939977 |
| 3 | 141902549 | 142058661 - | NM_001190855 | Pdlim5        | 55619  | 142002842 | 142003042 |
| 3 | 141902549 | 142058661 - | NM_001190855 | Pdlim5        | 9726   | 142048735 | 142048935 |

|   |           |             |              |        |        |           |           |
|---|-----------|-------------|--------------|--------|--------|-----------|-----------|
| 3 | 141902549 | 142058661 - | NM_001190855 | Pdlim5 | 49953  | 142008508 | 142008708 |
| 3 | 141902549 | 142058661 - | NM_001190855 | Pdlim5 | 56087  | 142002374 | 142002574 |
| 3 | 141902549 | 142058661 - | NM_001190855 | Pdlim5 | 118684 | 141939777 | 141939977 |
| 3 | 141902549 | 142058661 - | NM_001190856 | Pdlim5 | 55619  | 142002842 | 142003042 |
| 3 | 141902549 | 142058661 - | NM_001190856 | Pdlim5 | 9726   | 142048735 | 142048935 |
| 3 | 141902549 | 142058661 - | NM_001190856 | Pdlim5 | 49953  | 142008508 | 142008708 |
| 3 | 141902549 | 142058661 - | NM_001190856 | Pdlim5 | 56087  | 142002374 | 142002574 |
| 3 | 141902549 | 142058661 - | NM_001190856 | Pdlim5 | 118684 | 141939777 | 141939977 |
| 3 | 141902549 | 142058661 - | NM_019808    | Pdlim5 | 55619  | 142002842 | 142003042 |
| 3 | 141902549 | 142058661 - | NM_019808    | Pdlim5 | 9726   | 142048735 | 142048935 |
| 3 | 141902549 | 142058661 - | NM_019808    | Pdlim5 | 49953  | 142008508 | 142008708 |
| 3 | 141902549 | 142058661 - | NM_019808    | Pdlim5 | 56087  | 142002374 | 142002574 |
| 3 | 141902549 | 142058661 - | NM_019808    | Pdlim5 | 118684 | 141939777 | 141939977 |
| 3 | 141965044 | 142058661 - | NM_001190853 | Pdlim5 | 55619  | 142002842 | 142003042 |
| 3 | 141965044 | 142058661 - | NM_001190853 | Pdlim5 | 9726   | 142048735 | 142048935 |
| 3 | 141965044 | 142058661 - | NM_001190853 | Pdlim5 | 49953  | 142008508 | 142008708 |
| 3 | 141965044 | 142058661 - | NM_001190853 | Pdlim5 | 56087  | 142002374 | 142002574 |
| 3 | 141965044 | 142054815 - | NM_001190857 | Pdlim5 | 51773  | 142002842 | 142003042 |
| 3 | 141965044 | 142054815 - | NM_001190857 | Pdlim5 | 5880   | 142048735 | 142048935 |
| 3 | 141965044 | 142054815 - | NM_001190857 | Pdlim5 | 46107  | 142008508 | 142008708 |
| 3 | 141965044 | 142054815 - | NM_001190857 | Pdlim5 | 52241  | 142002374 | 142002574 |
| 3 | 141965044 | 142058661 - | NM_019809    | Pdlim5 | 55619  | 142002842 | 142003042 |
| 3 | 141965044 | 142058661 - | NM_019809    | Pdlim5 | 9726   | 142048735 | 142048935 |
| 3 | 141965044 | 142058661 - | NM_019809    | Pdlim5 | 49953  | 142008508 | 142008708 |
| 3 | 141965044 | 142058661 - | NM_019809    | Pdlim5 | 56087  | 142002374 | 142002574 |
| 3 | 141965044 | 142054815 - | NM_022554    | Pdlim5 | 51773  | 142002842 | 142003042 |
| 3 | 141965044 | 142054815 - | NM_022554    | Pdlim5 | 5880   | 142048735 | 142048935 |
| 3 | 141965044 | 142054815 - | NM_022554    | Pdlim5 | 46107  | 142008508 | 142008708 |
| 3 | 141965044 | 142054815 - | NM_022554    | Pdlim5 | 52241  | 142002374 | 142002574 |
| 3 | 142159898 | 142185309 + | NM_153564    | Gbp5   | -3013  | 142156685 | 142156885 |

|   |           |             |              |         |       |           |           |
|---|-----------|-------------|--------------|---------|-------|-----------|-----------|
| 3 | 142193300 | 142213116 + | NM_001083312 | Gbp7    | -2517 | 142190583 | 142190783 |
| 3 | 142193300 | 142213116 + | NM_145545    | Gbp7    | -2517 | 142190583 | 142190783 |
| 3 | 142257811 | 142282141 + | NM_010259    | Gbp2b   | 20890 | 142278701 | 142278901 |
| 3 | 142257811 | 142282141 + | NM_010259    | Gbp2b   | 8018  | 142265829 | 142266029 |
| 3 | 142283627 | 142300973 + | NM_010260    | Gbp2    | -4726 | 142278701 | 142278901 |
| 3 | 142364012 | 142407876 + | NM_001293560 | Ccbl2   | 9707  | 142373719 | 142373919 |
| 3 | 142364012 | 142407876 + | NM_001293560 | Ccbl2   | 7963  | 142371975 | 142372175 |
| 3 | 142364012 | 142407876 + | NM_001293560 | Ccbl2   | 7582  | 142371594 | 142371794 |
| 3 | 142364012 | 142407876 + | NM_173763    | Ccbl2   | 9707  | 142373719 | 142373919 |
| 3 | 142364012 | 142407876 + | NM_173763    | Ccbl2   | 7963  | 142371975 | 142372175 |
| 3 | 142364012 | 142407876 + | NM_173763    | Ccbl2   | 7582  | 142371594 | 142371794 |
| 3 | 142428211 | 142446570 + | NM_145546    | Gtf2b   | 5498  | 142433709 | 142433909 |
| 3 | 142428211 | 142446570 + | NM_145546    | Gtf2b   | 8728  | 142436939 | 142437139 |
| 3 | 142428211 | 142446570 + | NM_145546    | Gtf2b   | -7093 | 142420918 | 142421118 |
| 3 | 142453866 | 142544969 - | NM_178654    | Pkn2    | 55973 | 142488796 | 142488996 |
| 3 | 143851494 | 143865361 - | NM_001161769 | Lmo4    | 3190  | 143861971 | 143862171 |
| 3 | 143851494 | 143865297 - | NM_001161770 | Lmo4    | 3126  | 143861971 | 143862171 |
| 3 | 143851494 | 143868220 - | NM_010723    | Lmo4    | 6049  | 143861971 | 143862171 |
| 3 | 144094071 | 144233181 - | NM_011828    | Hs2st1  | 82428 | 144150553 | 144150753 |
| 3 | 144392641 | 144423942 - | NM_009899    | Clca3a1 | 0     | 144423796 | 144423996 |
| 3 | 144392641 | 144423942 - | NR_130895    | Clca3a1 | 0     | 144423796 | 144423996 |
| 3 | 144459523 | 144482459 - | NM_030601    | Clca3a2 | 19357 | 144462902 | 144463102 |
| 3 | 144573885 | 144595494 - | NM_001033199 | Clca4b  | 2615  | 144592679 | 144592879 |
| 3 | 144573885 | 144595494 - | NM_001033199 | Clca4b  | -502  | 144595996 | 144596196 |
| 3 | 144573885 | 144595494 - | NM_001033199 | Clca4b  | 2227  | 144593067 | 144593267 |
| 3 | 144667501 | 144695741 - | NM_017474    | Clca1   | -174  | 144695915 | 144696115 |
| 3 | 144733229 | 144762006 - | NM_178697    | Clca2   | 15701 | 144746105 | 144746305 |
| 3 | 144733229 | 144762006 - | NM_178697    | Clca2   | 2159  | 144759647 | 144759847 |
| 3 | 144733229 | 144762006 - | NM_178697    | Clca2   | 26341 | 144735465 | 144735665 |
| 3 | 144781553 | 144816880 + | NM_001162538 | Odf2l   | 28390 | 144809943 | 144810143 |

|   |           |             |              |               |        |           |           |
|---|-----------|-------------|--------------|---------------|--------|-----------|-----------|
| 3 | 144781553 | 144816880 + | NM_001162539 | Odf2l         | 28390  | 144809943 | 144810143 |
| 3 | 144781564 | 144816880 + | NM_025714    | Odf2l         | 28379  | 144809943 | 144810143 |
| 3 | 145587226 | 145597329 + | NM_009740    | Bcl10         | 9573   | 145596799 | 145596999 |
| 3 | 145600996 | 145607240 + | NM_025555    | 2410004B18Rik | -3997  | 145596799 | 145596999 |
| 3 | 145650834 | 145684685 + | NM_001166064 | Syde2         | -2233  | 145648401 | 145648601 |
| 3 | 145703490 | 145771001 - | NM_172864    | Wdr63         | -9928  | 145780929 | 145781129 |
| 3 | 145703490 | 145771001 - | NM_172864    | Wdr63         | 16476  | 145754325 | 145754525 |
| 3 | 145784755 | 145803611 + | NM_134160    | Mcoln3        | -3626  | 145780929 | 145781129 |
| 3 | 145812797 | 145858476 + | NM_026656    | Mcoln2        | 13888  | 145826685 | 145826885 |
| 3 | 145812797 | 145858476 + | NM_026656    | Mcoln2        | 27767  | 145840564 | 145840764 |
| 3 | 145813138 | 145858477 + | NM_001005846 | Mcoln2        | 13547  | 145826685 | 145826885 |
| 3 | 145813138 | 145858477 + | NM_001005846 | Mcoln2        | 27426  | 145840564 | 145840764 |
| 3 | 145883925 | 145949179 + | NM_022983    | Lpar3         | 6604   | 145890529 | 145890729 |
| 3 | 146030117 | 146041909 - | NR_033542    | Gm10636       | -1353  | 146043262 | 146043462 |
| 3 | 146067606 | 146103102 + | NM_001253768 | Ssx2ip        | 1212   | 146068818 | 146069018 |
| 3 | 146067606 | 146103102 + | NM_001253768 | Ssx2ip        | 6131   | 146073737 | 146073937 |
| 3 | 146067606 | 146103102 + | NM_001253769 | Ssx2ip        | 1212   | 146068818 | 146069018 |
| 3 | 146067606 | 146103102 + | NM_001253769 | Ssx2ip        | 6131   | 146073737 | 146073937 |
| 3 | 146067606 | 146103102 + | NM_001253770 | Ssx2ip        | 1212   | 146068818 | 146069018 |
| 3 | 146067606 | 146103102 + | NM_001253770 | Ssx2ip        | 6131   | 146073737 | 146073937 |
| 3 | 146067606 | 146103102 + | NM_138744    | Ssx2ip        | 1212   | 146068818 | 146069018 |
| 3 | 146067606 | 146103102 + | NM_138744    | Ssx2ip        | 6131   | 146073737 | 146073937 |
| 3 | 146169310 | 146184388 - | NM_027371    | Rpf1          | -309   | 146184697 | 146184897 |
| 3 | 146173759 | 146184388 - | NM_027332    | Rpf1          | -309   | 146184697 | 146184897 |
| 3 | 148478550 | 148617600 - | NM_001081298 | Adgrl2        | 105970 | 148511430 | 148511630 |
| 3 | 148478550 | 148617600 - | NM_001081298 | Adgrl2        | 73573  | 148543827 | 148544027 |
| 3 | 151756805 | 151828865 - | NM_016867    | Gipc2         | 44929  | 151783736 | 151783936 |
| 3 | 151756805 | 151828865 - | NM_016867    | Gipc2         | 2133   | 151826532 | 151826732 |
| 3 | 151756805 | 151828865 - | NM_016867    | Gipc2         | -5497  | 151834362 | 151834562 |
| 3 | 151756805 | 151828865 - | NM_016867    | Gipc2         | 24797  | 151803868 | 151804068 |



|   |           |             |              |            |        |           |           |
|---|-----------|-------------|--------------|------------|--------|-----------|-----------|
| 3 | 151756805 | 151828865 - | NM_016867    | Gipc2      | 43406  | 151785259 | 151785459 |
| 3 | 151756805 | 151828865 - | NM_016867    | Gipc2      | 52019  | 151776646 | 151776846 |
| 3 | 151756805 | 151828865 - | NM_016867    | Gipc2      | 63307  | 151765358 | 151765558 |
| 3 | 151846835 | 151873048 - | NM_027287    | Dnajb4     | 3779   | 151869069 | 151869269 |
| 3 | 151846835 | 151873048 - | NM_027287    | Dnajb4     | 1278   | 151871570 | 151871770 |
| 3 | 151846835 | 151873048 - | NM_027287    | Dnajb4     | 5683   | 151867165 | 151867365 |
| 3 | 151873422 | 151899795 + | NM_057172    | Fubp1      | -4153  | 151869069 | 151869269 |
| 3 | 151873422 | 151899795 + | NM_057172    | Fubp1      | -1652  | 151871570 | 151871770 |
| 3 | 151873422 | 151899795 + | NM_057172    | Fubp1      | -6057  | 151867165 | 151867365 |
| 3 | 151936424 | 152003372 - | NM_001162375 | Fam73a     | 23342  | 151979830 | 151980030 |
| 3 | 151936424 | 152003372 - | NM_174868    | Fam73a     | 23342  | 151979830 | 151980030 |
| 3 | 152009442 | 152056579 + | NM_001076676 | Usp33      | 4166   | 152013608 | 152013808 |
| 3 | 152009442 | 152056579 + | NM_001252486 | Usp33      | 4166   | 152013608 | 152013808 |
| 3 | 152009442 | 152056579 + | NM_133247    | Usp33      | 4166   | 152013608 | 152013808 |
| 3 | 152058967 | 152125791 + | NM_001080755 | Zzz3       | 42322  | 152101289 | 152101489 |
| 3 | 152059648 | 152125791 + | NM_001287139 | Zzz3       | 41641  | 152101289 | 152101489 |
| 3 | 152865473 | 153388098 - | NM_011372    | St6galnac3 | 490137 | 152897761 | 152897961 |
| 3 | 153507211 | 153516580 + | NM_025758    | Asb17      | -8271  | 153498740 | 153498940 |
| 3 | 153520105 | 153567856 - | NM_001282054 | Msh4       | 2712   | 153564944 | 153565144 |
| 3 | 153520105 | 153567856 - | NM_001282054 | Msh4       | -5342  | 153573198 | 153573398 |
| 3 | 153520105 | 153567856 - | NM_001282054 | Msh4       | 7182   | 153560474 | 153560674 |
| 3 | 153520105 | 153569103 - | NM_031870    | Msh4       | 3959   | 153564944 | 153565144 |
| 3 | 153520105 | 153569103 - | NM_031870    | Msh4       | -4095  | 153573198 | 153573398 |
| 3 | 153520105 | 153569103 - | NM_031870    | Msh4       | 8429   | 153560474 | 153560674 |
| 3 | 153570253 | 153575931 - | NM_001163478 | Rabggtb    | 2533   | 153573198 | 153573398 |
| 3 | 153570253 | 153573932 - | NM_001163479 | Rabggtb    | 534    | 153573198 | 153573398 |
| 3 | 153570253 | 153575168 - | NM_011231    | Rabggtb    | 1770   | 153573198 | 153573398 |
| 3 | 153570253 | 153575931 - | NR_028094    | Rabggtb    | 2533   | 153573198 | 153573398 |
| 3 | 153570253 | 153575168 - | NR_028095    | Rabggtb    | 1770   | 153573198 | 153573398 |
| 3 | 153570253 | 153575168 - | NR_028096    | Rabggtb    | 1770   | 153573198 | 153573398 |

|   |           |             |               |               |        |           |           |
|---|-----------|-------------|---------------|---------------|--------|-----------|-----------|
| 3 | 153570253 | 153573932 - | NR_028097     | Rabggtb       | 534    | 153573198 | 153573398 |
| 3 | 153570253 | 153573932 - | NR_028098     | Rabggtb       | 534    | 153573198 | 153573398 |
| 3 | 153573531 | 153573576 - | NR_028561     | Snord45b      | 178    | 153573198 | 153573398 |
| 3 | 153575093 | 153575154 - | NR_028525     | Snord45c      | 1756   | 153573198 | 153573398 |
| 3 | 153969258 | 153993525 - | NM_010713     | Lhx8          | 0      | 153993521 | 153993721 |
| 3 | 153993785 | 153997652 + | NR_040387     | Al606473      | -64    | 153993521 | 153993721 |
| 3 | 154449255 | 154718372 - | NM_177066     | Tnni3k        | 174508 | 154543664 | 154543864 |
| 3 | 154449255 | 154718372 - | NM_177066     | Tnni3k        | 173641 | 154544531 | 154544731 |
| 3 | 157229856 | 157307723 + | NM_011196     | Ptger3        | 31223  | 157261079 | 157261279 |
| 3 | 157557212 | 157588028 - | NM_145953     | Cth           | -6083  | 157594111 | 157594311 |
| 3 | 157557212 | 157588028 - | NM_145953     | Cth           | 14506  | 157573322 | 157573522 |
| 3 | 159502659 | 159598140 + | NM_026582     | Wls           | 45517  | 159548176 | 159548376 |
| 3 | 159502659 | 159598140 + | NR_037590     | Wls           | 45517  | 159548176 | 159548376 |
| 4 | 3502026   | 3543771 +   | NM_054089     | Tgs1          | 21239  | 3523265   | 3523465   |
| 4 | 3605268   | 3718760 +   | NM_0011111096 | Lyn           | 102849 | 3708117   | 3708317   |
| 4 | 3605268   | 3718760 +   | NM_010747     | Lyn           | 102849 | 3708117   | 3708317   |
| 4 | 3797805   | 3799253 -   | NM_020021     | Mos           | -2624  | 3801877   | 3802077   |
| 4 | 4691501   | 4720454 -   | NM_177730     | Impad1        | -4144  | 4724598   | 4724798   |
| 4 | 6614533   | 6917871 -   | NM_145711     | Tox           | 93741  | 6823930   | 6824130   |
| 4 | 6614533   | 6917871 -   | NM_145711     | Tox           | 20137  | 6897534   | 6897734   |
| 4 | 6614533   | 6917871 -   | NM_145711     | Tox           | 76095  | 6841576   | 6841776   |
| 4 | 6614533   | 6917871 -   | NM_145711     | Tox           | 298037 | 6619634   | 6619834   |
| 4 | 6614533   | 6917871 -   | NM_145711     | Tox           | 188889 | 6728782   | 6728982   |
| 4 | 8068640   | 8166189 -   | NM_007592     | Car8          | 38513  | 8127476   | 8127676   |
| 4 | 8462791   | 8534850 +   | NM_021518     | Rab2a         | 15706  | 8478497   | 8478697   |
| 4 | 8462791   | 8534850 +   | NM_021518     | Rab2a         | 53258  | 8516049   | 8516249   |
| 4 | 8617553   | 8795597 +   | NM_001277149  | Chd7          | 56883  | 8674436   | 8674636   |
| 4 | 10801645  | 10826571 +  | NM_026005     | 2610301B20Rik | 1151   | 10802796  | 10802996  |
| 4 | 10915809  | 10934767 -  | NM_175175     | Plekhf2       | -4750  | 10939517  | 10939717  |
| 4 | 10915809  | 10934767 -  | NM_175175     | Plekhf2       | -7574  | 10942341  | 10942541  |

|   |          |            |              |               |        |          |          |
|---|----------|------------|--------------|---------------|--------|----------|----------|
| 4 | 11486067 | 11542956 + | NM_001039556 | Rad54b        | 16593  | 11502660 | 11502860 |
| 4 | 11486067 | 11514950 + | NM_001256145 | Rad54b        | 16593  | 11502660 | 11502860 |
| 4 | 11506809 | 11514950 + | NM_001256142 | Fsbp          | -3949  | 11502660 | 11502860 |
| 4 | 11685304 | 11745053 + | NM_019753    | Cdh17         | 1118   | 11686422 | 11686622 |
| 4 | 11685304 | 11745053 + | NM_019753    | Cdh17         | 13123  | 11698427 | 11698627 |
| 4 | 11685304 | 11745053 + | NM_019753    | Cdh17         | 35046  | 11720350 | 11720550 |
| 4 | 11685304 | 11745053 + | NM_019753    | Cdh17         | 14647  | 11699951 | 11700151 |
| 4 | 11685304 | 11745053 + | NM_019753    | Cdh17         | 6835   | 11692139 | 11692339 |
| 4 | 11685304 | 11745053 + | NM_019753    | Cdh17         | 11173  | 11696477 | 11696677 |
| 4 | 11685304 | 11745053 + | NM_019753    | Cdh17         | 4881   | 11690185 | 11690385 |
| 4 | 11685304 | 11745053 + | NM_019753    | Cdh17         | -4158  | 11680946 | 11681146 |
| 4 | 11885330 | 11893129 - | NM_001290387 | Pdp1          | -990   | 11894119 | 11894319 |
| 4 | 11885330 | 11893129 - | NM_001290391 | Pdp1          | -990   | 11894119 | 11894319 |
| 4 | 11885332 | 11893598 - | NM_001033453 | Pdp1          | -521   | 11894119 | 11894319 |
| 4 | 11885332 | 11893598 - | NM_001098230 | Pdp1          | -521   | 11894119 | 11894319 |
| 4 | 11885332 | 11892861 - | NM_001098231 | Pdp1          | -1258  | 11894119 | 11894319 |
| 4 | 11893721 | 11921443 + | NR_040577    | 1700123M08Rik | 398    | 11894119 | 11894319 |
| 4 | 14592901 | 14723200 - | NM_028499    | Lrrc69        | -5066  | 14728266 | 14728466 |
| 4 | 14879392 | 15076279 - | NM_178617    | Necab1        | 126577 | 14949502 | 14949702 |
| 4 | 15192967 | 15213901 + | NM_181401    | Tmem64        | -1519  | 15191248 | 15191448 |
| 4 | 15192967 | 15213901 + | NM_181401    | Tmem64        | -362   | 15192405 | 15192605 |
| 4 | 15844387 | 15872655 - | NM_026172    | Decr1         | 18758  | 15853697 | 15853897 |
| 4 | 15885114 | 15919737 + | NM_013752    | Nbn           | 28466  | 15913580 | 15913780 |
| 4 | 15885114 | 15919737 + | NM_013752    | Nbn           | 3656   | 15888770 | 15888970 |
| 4 | 15924268 | 15941025 - | NM_145950    | Osgin2        | -1049  | 15942074 | 15942274 |
| 4 | 16050522 | 16090646 - | NM_138952    | Ripk2         | 1257   | 16089189 | 16089389 |
| 4 | 16050522 | 16090646 - | NM_138952    | Ripk2         | -1286  | 16091932 | 16092132 |
| 4 | 16091257 | 16193373 + | NR_045765    | A530072M11Rik | -1868  | 16089189 | 16089389 |
| 4 | 16091257 | 16193373 + | NR_045765    | A530072M11Rik | 675    | 16091932 | 16092132 |
| 4 | 19446399 | 19497252 - | NM_027769    | Cpne3         | 11813  | 19485239 | 19485439 |

|   |          |            |              |        |        |          |          |
|---|----------|------------|--------------|--------|--------|----------|----------|
| 4 | 19535446 | 19636152 - | NM_001276292 | Wwp1   | -8315  | 19644467 | 19644667 |
| 4 | 19535446 | 19636152 - | NM_177327    | Wwp1   | -8315  | 19644467 | 19644667 |
| 4 | 19535446 | 19636152 - | NR_074089    | Wwp1   | -8315  | 19644467 | 19644667 |
| 4 | 19535446 | 19636152 - | NR_074090    | Wwp1   | -8315  | 19644467 | 19644667 |
| 4 | 20046021 | 20705816 - | NM_001290410 | Nkain3 | 618688 | 20086928 | 20087128 |
| 4 | 21684529 | 21694359 - | NM_029840    | Tstd3  | -4437  | 21698796 | 21698996 |
| 4 | 21703417 | 21765020 + | NM_001290425 | Usp45  | -4421  | 21698796 | 21698996 |
| 4 | 21703417 | 21765020 + | NM_152825    | Usp45  | -4421  | 21698796 | 21698996 |
| 4 | 21806822 | 21839274 + | NM_172687    | Coq3   | -613   | 21806009 | 21806209 |
| 4 | 25175733 | 25208969 - | NM_026194    | Ufl1   | 14386  | 25194383 | 25194583 |
| 4 | 32504410 | 32673084 + | NM_001109661 | Bach2  | 133885 | 32638295 | 32638495 |
| 4 | 32504410 | 32673084 + | NM_001109661 | Bach2  | 121636 | 32626046 | 32626246 |
| 4 | 33069973 | 33109156 + | NM_027491    | Rragd  | 4109   | 33074082 | 33074282 |
| 4 | 33069973 | 33109156 + | NM_027491    | Rragd  | 25291  | 33095264 | 33095464 |
| 4 | 33069973 | 33109156 + | NM_027491    | Rragd  | 23394  | 33093367 | 33093567 |
| 4 | 33219531 | 33250564 + | NM_008075    | Gabrr1 | -8113  | 33211218 | 33211418 |
| 4 | 33295966 | 33320316 + | NM_177774    | Srsf12 | 20781  | 33316747 | 33316947 |
| 4 | 33397286 | 33589590 + | NM_001305273 | Rngtt  | 26752  | 33424038 | 33424238 |
| 4 | 33397286 | 33589590 + | NM_011884    | Rngtt  | 26752  | 33424038 | 33424238 |
| 4 | 34514030 | 34562192 - | NM_001159563 | Orc3   | 20679  | 34541313 | 34541513 |
| 4 | 34514030 | 34562192 - | NM_015824    | Orc3   | 20679  | 34541313 | 34541513 |
| 4 | 34562207 | 34607417 + | NM_181406    | Rars2  | 15713  | 34577920 | 34578120 |
| 4 | 34750359 | 34830198 - | NM_013889    | Zfp292 | 1544   | 34828454 | 34828654 |
| 4 | 34750359 | 34830198 - | NM_013889    | Zfp292 | -6646  | 34836844 | 34837044 |
| 4 | 34750359 | 34830198 - | NM_013889    | Zfp292 | 39433  | 34790565 | 34790765 |
| 4 | 34841028 | 34854624 + | NM_009889    | Cga    | -3984  | 34836844 | 34837044 |
| 4 | 34896323 | 35104734 - | NM_178061    | Mob3b  | 60379  | 35044155 | 35044355 |
| 4 | 34896323 | 35104734 - | NM_178061    | Mob3b  | 1222   | 35103312 | 35103512 |
| 4 | 34896323 | 35104734 - | NM_178061    | Mob3b  | 58615  | 35045919 | 35046119 |
| 4 | 34896323 | 35104734 - | NM_178061    | Mob3b  | 169853 | 34934681 | 34934881 |

|   |          |            |              |               |         |          |          |
|---|----------|------------|--------------|---------------|---------|----------|----------|
| 4 | 34896323 | 35104734 - | NM_178061    | Mob3b         | 105062  | 34999472 | 34999672 |
| 4 | 34896323 | 35104734 - | NM_178061    | Mob3b         | 74848   | 35029686 | 35029886 |
| 4 | 34896323 | 35104734 - | NM_178061    | Mob3b         | 166490  | 34938044 | 34938244 |
| 4 | 35138531 | 35173130 - | NM_001081343 | 3110043O21Rik | 617     | 35172313 | 35172513 |
| 4 | 35653897 | 36898778 - | NM_001165999 | Lingo2        | 937238  | 35961340 | 35961540 |
| 4 | 35653897 | 36898778 - | NM_001165999 | Lingo2        | 390381  | 36508197 | 36508397 |
| 4 | 35653897 | 36898778 - | NM_001165999 | Lingo2        | 912677  | 35985901 | 35986101 |
| 4 | 35653897 | 36898778 - | NM_001165999 | Lingo2        | 999523  | 35899055 | 35899255 |
| 4 | 35653897 | 36898778 - | NM_001165999 | Lingo2        | 959493  | 35939085 | 35939285 |
| 4 | 35653897 | 36898778 - | NM_001165999 | Lingo2        | 1136552 | 35762026 | 35762226 |
| 4 | 35653897 | 36665997 - | NM_001166000 | Lingo2        | 704457  | 35961340 | 35961540 |
| 4 | 35653897 | 36665997 - | NM_001166000 | Lingo2        | 157600  | 36508197 | 36508397 |
| 4 | 35653897 | 36665997 - | NM_001166000 | Lingo2        | 679896  | 35985901 | 35986101 |
| 4 | 35653897 | 36665997 - | NM_001166000 | Lingo2        | 766742  | 35899055 | 35899255 |
| 4 | 35653897 | 36665997 - | NM_001166000 | Lingo2        | 726712  | 35939085 | 35939285 |
| 4 | 35653897 | 36665997 - | NM_001166000 | Lingo2        | 903771  | 35762026 | 35762226 |
| 4 | 35653897 | 35792446 - | NM_001166001 | Lingo2        | 30220   | 35762026 | 35762226 |
| 4 | 35653897 | 35792446 - | NM_175516    | Lingo2        | 30220   | 35762026 | 35762226 |
| 4 | 40090298 | 40146043 + | NM_007386    | Aco1          | 38870   | 40129168 | 40129368 |
| 4 | 40260265 | 40264753 + | NR_040663    | 4930509K18Rik | -2069   | 40257996 | 40258196 |
| 4 | 40667187 | 40669351 - | NR_077221    | Gm6297        | -882    | 40670233 | 40670433 |
| 4 | 40667187 | 40669875 - | NR_077226    | Gm6297        | -358    | 40670233 | 40670433 |
| 4 | 40669501 | 40684185 + | NM_008298    | Dnaja1        | 732     | 40670233 | 40670433 |
| 4 | 40669950 | 40670029 + | NR_029594    | Mir207        | 283     | 40670233 | 40670433 |
| 4 | 40669955 | 40684185 + | NM_001164671 | Dnaja1        | 278     | 40670233 | 40670433 |
| 4 | 40669963 | 40684185 + | NM_001164672 | Dnaja1        | 270     | 40670233 | 40670433 |
| 4 | 40751615 | 40801571 - | NM_022305    | B4galt1       | 16824   | 40784547 | 40784747 |
| 4 | 40751615 | 40801571 - | NM_022305    | B4galt1       | -4934   | 40806505 | 40806705 |
| 4 | 40751615 | 40801571 - | NM_022305    | B4galt1       | -6542   | 40808113 | 40808313 |
| 4 | 40751615 | 40801571 - | NM_022305    | B4galt1       | 4571    | 40796800 | 40797000 |

|   |          |            |              |               |       |          |          |
|---|----------|------------|--------------|---------------|-------|----------|----------|
| 4 | 40751615 | 40801571 - | NM_022305    | B4galt1       | -1092 | 40802663 | 40802863 |
| 4 | 40751615 | 40801571 - | NM_022305    | B4galt1       | 14943 | 40786428 | 40786628 |
| 4 | 40797089 | 40797172 - | NR_039584    | Mir5123       | -9333 | 40806505 | 40806705 |
| 4 | 40797089 | 40797172 - | NR_039584    | Mir5123       | 172   | 40796800 | 40797000 |
| 4 | 40797089 | 40797172 - | NR_039584    | Mir5123       | -5491 | 40802663 | 40802863 |
| 4 | 40867089 | 40878429 + | NM_011463    | Spink4        | 0     | 40866937 | 40867137 |
| 4 | 41039757 | 41045217 - | NM_016689    | Aqp3          | 1855  | 41043162 | 41043362 |
| 4 | 41238333 | 41261935 - | NM_026893    | Dcaf12        | -177  | 41262112 | 41262312 |
| 4 | 41238333 | 41261935 - | NM_026893    | Dcaf12        | 627   | 41261108 | 41261308 |
| 4 | 41296029 | 41336800 + | NM_001290454 | Ubap1         | 13763 | 41309792 | 41309992 |
| 4 | 41296029 | 41336800 + | NM_023305    | Ubap1         | 13763 | 41309792 | 41309992 |
| 4 | 41452042 | 41464367 - | NM_001048005 | 1110017D15Rik | -985  | 41465352 | 41465552 |
| 4 | 41452042 | 41464367 - | NM_001048005 | 1110017D15Rik | -1991 | 41466358 | 41466558 |
| 4 | 41452042 | 41464367 - | NM_001253777 | 1110017D15Rik | -985  | 41465352 | 41465552 |
| 4 | 41452042 | 41464367 - | NM_001253777 | 1110017D15Rik | -1991 | 41466358 | 41466558 |
| 4 | 41452042 | 41464367 - | NM_001253788 | 1110017D15Rik | -985  | 41465352 | 41465552 |
| 4 | 41452042 | 41464367 - | NM_001253788 | 1110017D15Rik | -1991 | 41466358 | 41466558 |
| 4 | 41452042 | 41464367 - | NR_045549    | 1110017D15Rik | -985  | 41465352 | 41465552 |
| 4 | 41452042 | 41464367 - | NR_045549    | 1110017D15Rik | -1991 | 41466358 | 41466558 |
| 4 | 41464470 | 41465963 + | NR_045726    | Fam219aos     | 882   | 41465352 | 41465552 |
| 4 | 41464470 | 41465963 + | NR_045726    | Fam219aos     | 1888  | 41466358 | 41466558 |
| 4 | 41465962 | 41516561 - | NM_001159583 | Fam219a       | 50003 | 41466358 | 41466558 |
| 4 | 41465962 | 41516561 - | NM_027993    | Fam219a       | 50003 | 41466358 | 41466558 |
| 4 | 41604529 | 41642478 - | NM_001136056 | Cntfr         | -9881 | 41652359 | 41652559 |
| 4 | 41604529 | 41644124 - | NM_016673    | Cntfr         | -8235 | 41652359 | 41652559 |
| 4 | 41616706 | 41644124 - | NM_001146080 | Cntfr         | -8235 | 41652359 | 41652559 |
| 4 | 41702101 | 41706098 + | NM_016658    | Galt          | 1747  | 41703848 | 41704048 |
| 4 | 41703083 | 41706098 + | NM_001302511 | Galt          | 765   | 41703848 | 41704048 |
| 4 | 41707316 | 41716347 + | NM_001163401 | Il11ra1       | -3268 | 41703848 | 41704048 |
| 4 | 41707316 | 41716347 + | NM_001172054 | Il11ra1       | -3268 | 41703848 | 41704048 |

|   |          |            |              |          |        |          |          |
|---|----------|------------|--------------|----------|--------|----------|----------|
| 4 | 41709183 | 41716347 + | NM_010549    | Il11ra1  | -5135  | 41703848 | 41704048 |
| 4 | 42880875 | 42887076 - | NM_177785    | Fam205c  | -3540  | 42890616 | 42890816 |
| 4 | 43040562 | 43044257 - | NM_023231    | Stoml2   | -6549  | 43050806 | 43051006 |
| 4 | 43045286 | 43053174 - | NM_001253353 | Fam214b  | 2168   | 43050806 | 43051006 |
| 4 | 43045286 | 43053174 - | NM_001253354 | Fam214b  | 2168   | 43050806 | 43051006 |
| 4 | 43045286 | 43059093 - | NM_172691    | Fam214b  | 8087   | 43050806 | 43051006 |
| 4 | 43045286 | 43059093 - | NR_045567    | Fam214b  | 8087   | 43050806 | 43051006 |
| 4 | 43071825 | 43277746 + | NM_001081413 | Unc13b   | 24279  | 43096104 | 43096304 |
| 4 | 43071825 | 43277746 + | NM_001310758 | Unc13b   | 24279  | 43096104 | 43096304 |
| 4 | 43071825 | 43277746 + | NM_021468    | Unc13b   | 24279  | 43096104 | 43096304 |
| 4 | 43494955 | 43496582 - | NM_019436    | Sit1     | -7258  | 43503840 | 43504040 |
| 4 | 43494955 | 43496582 - | NM_019436    | Sit1     | 2434   | 43493948 | 43494148 |
| 4 | 43505657 | 43505932 - | NR_001460    | Rmrp     | 1892   | 43503840 | 43504040 |
| 4 | 43506237 | 43508794 + | NM_001037913 | Ccdc107  | -2197  | 43503840 | 43504040 |
| 4 | 43509016 | 43512533 - | NM_001013377 | Arhgef39 | -4762  | 43517295 | 43517495 |
| 4 | 43519898 | 43526598 + | NM_139305    | Car9     | -2403  | 43517295 | 43517495 |
| 4 | 43526598 | 43536427 - | NM_001277875 | Tpm2     | 7033   | 43529194 | 43529394 |
| 4 | 43526598 | 43536427 - | NM_001277876 | Tpm2     | 7033   | 43529194 | 43529394 |
| 4 | 43526598 | 43536427 - | NM_009416    | Tpm2     | 7033   | 43529194 | 43529394 |
| 4 | 43579800 | 43591737 - | NM_172692    | Gba2     | 3471   | 43588066 | 43588266 |
| 4 | 43591607 | 43600360 + | NM_172866    | Rgp1     | -3341  | 43588066 | 43588266 |
| 4 | 43888402 | 43957679 + | NM_016678    | Reck     | 59262  | 43947664 | 43947864 |
| 4 | 43970574 | 43991991 + | NM_027450    | Glipr2   | 9160   | 43979734 | 43979934 |
| 4 | 44313789 | 44377548 + | NM_010790    | Melk     | -7857  | 44305732 | 44305932 |
| 4 | 44769431 | 44945087 + | NM_138590    | Zcchc7   | 117981 | 44887412 | 44887612 |
| 4 | 45047120 | 45097477 - | NM_001024142 | Fbxo10   | 21736  | 45075541 | 45075741 |
| 4 | 45408796 | 45421639 - | NM_001009949 | Slc25a51 | 5163   | 45416276 | 45416476 |
| 4 | 45408796 | 45421639 - | NM_001009949 | Slc25a51 | -146   | 45421785 | 45421985 |
| 4 | 45436148 | 45543701 - | NM_001033306 | Shb      | 55584  | 45487917 | 45488117 |
| 4 | 45436148 | 45543701 - | NM_001033306 | Shb      | 23424  | 45520077 | 45520277 |

|   |          |            |              |               |        |          |          |
|---|----------|------------|--------------|---------------|--------|----------|----------|
| 4 | 45811894 | 45817481 + | NM_028270    | Aldh1b1       | 0      | 45811754 | 45811954 |
| 4 | 45811894 | 45817481 + | NM_028270    | Aldh1b1       | -1443  | 45810251 | 45810451 |
| 4 | 45811894 | 45817481 + | NM_028270    | Aldh1b1       | -676   | 45811018 | 45811218 |
| 4 | 45811894 | 45817481 + | NM_028270    | Aldh1b1       | -9109  | 45802585 | 45802785 |
| 4 | 45903175 | 45963647 + | NM_198660    | Ccdc180       | 0      | 45903172 | 45903372 |
| 4 | 45978207 | 46047638 + | NM_001290475 | Tdrd7         | 19354  | 45997561 | 45997761 |
| 4 | 45978207 | 46047638 + | NM_001290475 | Tdrd7         | 392    | 45978599 | 45978799 |
| 4 | 45978207 | 46047638 + | NM_001290475 | Tdrd7         | 2562   | 45980769 | 45980969 |
| 4 | 45985169 | 46047638 + | NM_146142    | Tdrd7         | 12392  | 45997561 | 45997761 |
| 4 | 45985169 | 46047638 + | NM_146142    | Tdrd7         | -6370  | 45978599 | 45978799 |
| 4 | 45985169 | 46047638 + | NM_146142    | Tdrd7         | -4200  | 45980769 | 45980969 |
| 4 | 46389847 | 46402296 - | NM_029086    | 5830415F09Rik | 4719   | 46397377 | 46397577 |
| 4 | 46517944 | 46549014 - | NM_029077    | Trim14        | 6167   | 46542647 | 46542847 |
| 4 | 46517944 | 46549014 - | NM_029077    | Trim14        | 840    | 46547974 | 46548174 |
| 4 | 46549809 | 46614802 - | NM_001164804 | Coro2a        | 27185  | 46587417 | 46587617 |
| 4 | 46549809 | 46614802 - | NM_001164804 | Coro2a        | 7560   | 46607042 | 46607242 |
| 4 | 46549809 | 46614802 - | NM_001164804 | Coro2a        | 4209   | 46610393 | 46610593 |
| 4 | 46549809 | 46614802 - | NM_001164804 | Coro2a        | 15433  | 46599169 | 46599369 |
| 4 | 46549809 | 46614802 - | NM_001164804 | Coro2a        | 42921  | 46571681 | 46571881 |
| 4 | 46549809 | 46614802 - | NM_001164804 | Coro2a        | 29897  | 46584705 | 46584905 |
| 4 | 46549809 | 46579313 - | NM_178893    | Coro2a        | -8104  | 46587417 | 46587617 |
| 4 | 46549809 | 46579313 - | NM_178893    | Coro2a        | 7432   | 46571681 | 46571881 |
| 4 | 46549809 | 46579313 - | NM_178893    | Coro2a        | -5392  | 46584705 | 46584905 |
| 4 | 46676770 | 47004587 - | NM_001081141 | Gabbr2        | -8935  | 47013522 | 47013722 |
| 4 | 47220884 | 47326038 + | NM_009928    | Col15a1       | 82715  | 47303599 | 47303799 |
| 4 | 47482705 | 47487240 - | NM_019998    | Alg2          | -93    | 47487333 | 47487533 |
| 4 | 47487533 | 47496106 + | NM_024171    | Sec61b        | 0      | 47487333 | 47487533 |
| 4 | 48292632 | 48444826 + | NM_001281977 | Invs          | 105190 | 48397822 | 48398022 |
| 4 | 48292632 | 48444826 + | NM_001281977 | Invs          | 35230  | 48327862 | 48328062 |
| 4 | 48292632 | 48444826 + | NM_001281978 | Invs          | 105190 | 48397822 | 48398022 |



|   |          |            |              |               |        |          |          |
|---|----------|------------|--------------|---------------|--------|----------|----------|
| 4 | 48292632 | 48444826 + | NM_001281978 | Invs          | 35230  | 48327862 | 48328062 |
| 4 | 48292632 | 48444826 + | NM_010569    | Invs          | 105190 | 48397822 | 48398022 |
| 4 | 48292632 | 48444826 + | NM_010569    | Invs          | 35230  | 48327862 | 48328062 |
| 4 | 48552818 | 48574793 + | NM_001145925 | Msantd3       | 6107   | 48558925 | 48559125 |
| 4 | 48552953 | 48574793 + | NM_001145924 | Msantd3       | 5972   | 48558925 | 48559125 |
| 4 | 48553371 | 48574793 + | NM_028137    | Msantd3       | 5554   | 48558925 | 48559125 |
| 4 | 49072334 | 49353134 + | NM_178756    | Lppr1         | 105923 | 49178257 | 49178457 |
| 4 | 49502290 | 49519431 - | NM_007519    | Baat          | 162    | 49519069 | 49519269 |
| 4 | 49548867 | 49562356 - | NM_144903    | Aldob         | -8744  | 49571100 | 49571300 |
| 4 | 49548867 | 49562356 - | NM_144903    | Aldob         | 0      | 49562316 | 49562516 |
| 4 | 49597378 | 49610743 - | NM_025944    | Tmem246       | 7591   | 49602952 | 49603152 |
| 4 | 52452093 | 52501238 + | NM_001301412 | Smc2          | -9479  | 52442414 | 52442614 |
| 4 | 52452093 | 52501238 + | NM_008017    | Smc2          | -9479  | 52442414 | 52442614 |
| 4 | 53259068 | 53263993 + | NR_040665    | 4930522O17Rik | 2927   | 53261995 | 53262195 |
| 4 | 53274228 | 53283105 - | NR_033139    | AI427809      | 0      | 53283091 | 53283291 |
| 4 | 53274228 | 53278365 - | NR_033140    | AI427809      | -4726  | 53283091 | 53283291 |
| 4 | 53453285 | 53563037 + | NM_001159633 | Slc44a1       | 48548  | 53501833 | 53502033 |
| 4 | 53453285 | 53563037 + | NM_001159633 | Slc44a1       | 11547  | 53464832 | 53465032 |
| 4 | 53453285 | 53635351 + | NM_133891    | Slc44a1       | 48548  | 53501833 | 53502033 |
| 4 | 53453285 | 53635351 + | NM_133891    | Slc44a1       | 181248 | 53634533 | 53634733 |
| 4 | 53453285 | 53635351 + | NM_133891    | Slc44a1       | 180864 | 53634149 | 53634349 |
| 4 | 53453285 | 53635351 + | NM_133891    | Slc44a1       | 11547  | 53464832 | 53465032 |
| 4 | 53644343 | 53719882 + | NM_001195284 | Fsd1l         | -9610  | 53634533 | 53634733 |
| 4 | 53644343 | 53719882 + | NM_001195284 | Fsd1l         | -9994  | 53634149 | 53634349 |
| 4 | 53644343 | 53664492 + | NM_176966    | Fsd1l         | -9610  | 53634533 | 53634733 |
| 4 | 53644343 | 53664492 + | NM_176966    | Fsd1l         | -9994  | 53634149 | 53634349 |
| 4 | 54960817 | 55096436 + | NM_172867    | Zfp462        | 57765  | 55018582 | 55018782 |
| 4 | 55423315 | 55431715 - | NR_040674    | Gm12505       | -7497  | 55439212 | 55439412 |
| 4 | 56823807 | 56878084 - | NM_018761    | Ctnnal1       | -7461  | 56885545 | 56885745 |
| 4 | 57074598 | 57156029 - | NM_019427    | Epb4.1l4b     | 2227   | 57153602 | 57153802 |

|   |          |            |              |           |        |          |          |
|---|----------|------------|--------------|-----------|--------|----------|----------|
| 4 | 57074598 | 57156029 - | NM_019427    | Epb4.1l4b | 822    | 57155007 | 57155207 |
| 4 | 57074598 | 57156029 - | NM_019427    | Epb4.1l4b | 19951  | 57135878 | 57136078 |
| 4 | 57074598 | 57156029 - | NM_019427    | Epb4.1l4b | 15208  | 57140621 | 57140821 |
| 4 | 57074598 | 57156029 - | NM_019427    | Epb4.1l4b | 24001  | 57131828 | 57132028 |
| 4 | 57203713 | 57314710 - | NM_011207    | Ptpn3     | 19540  | 57294970 | 57295170 |
| 4 | 57203713 | 57314710 - | NM_011207    | Ptpn3     | 68518  | 57245992 | 57246192 |
| 4 | 57956245 | 57969284 - | NM_011660    | Txn1      | 9042   | 57960042 | 57960242 |
| 4 | 57956245 | 57969284 - | NM_011660    | Txn1      | 1142   | 57967942 | 57968142 |
| 4 | 57996901 | 58021997 - | NM_026132    | Txndc8    | 17925  | 58003872 | 58004072 |
| 4 | 58055668 | 58219469 - | NM_022814    | Svep1     | 126575 | 58092694 | 58092894 |
| 4 | 58298834 | 58387176 + | NM_001037127 | Musk      | 47983  | 58346817 | 58347017 |
| 4 | 58298834 | 58387176 + | NM_001037128 | Musk      | 47983  | 58346817 | 58347017 |
| 4 | 58298834 | 58387176 + | NM_001037129 | Musk      | 47983  | 58346817 | 58347017 |
| 4 | 58298834 | 58387176 + | NM_001037130 | Musk      | 47983  | 58346817 | 58347017 |
| 4 | 58298834 | 58368966 + | NM_001165996 | Musk      | 47983  | 58346817 | 58347017 |
| 4 | 58298834 | 58387176 + | NM_010944    | Musk      | 47983  | 58346817 | 58347017 |
| 4 | 58448124 | 58566364 - | NM_010336    | Lpar1     | -1101  | 58567465 | 58567665 |
| 4 | 58448124 | 58566364 - | NM_010336    | Lpar1     | -9886  | 58576250 | 58576450 |
| 4 | 58448124 | 58566364 - | NM_010336    | Lpar1     | 25335  | 58540829 | 58541029 |
| 4 | 58448124 | 58566364 - | NM_010336    | Lpar1     | 6936   | 58559228 | 58559428 |
| 4 | 58448124 | 58566364 - | NM_010336    | Lpar1     | 27420  | 58538744 | 58538944 |
| 4 | 58448124 | 58566166 - | NM_172989    | Lpar1     | -1299  | 58567465 | 58567665 |
| 4 | 58448124 | 58566166 - | NM_172989    | Lpar1     | 25137  | 58540829 | 58541029 |
| 4 | 58448124 | 58566166 - | NM_172989    | Lpar1     | 6738   | 58559228 | 58559428 |
| 4 | 58448124 | 58566166 - | NM_172989    | Lpar1     | 27222  | 58538744 | 58538944 |
| 4 | 58812903 | 58925598 - | NM_172381    | Al314180  | -874   | 58926472 | 58926672 |
| 4 | 58812903 | 58925598 - | NM_172381    | Al314180  | 18037  | 58907361 | 58907561 |
| 4 | 58978462 | 58999951 - | NM_025968    | Ptgr1     | -7737  | 59007688 | 59007888 |
| 4 | 58978462 | 58999951 - | NM_025968    | Ptgr1     | 1557   | 58998194 | 58998394 |
| 4 | 59016065 | 59036271 + | NM_001033165 | Dnajc25   | -8177  | 59007688 | 59007888 |

|   |          |            |              |               |        |          |          |
|---|----------|------------|--------------|---------------|--------|----------|----------|
| 4 | 59016065 | 59036271 + | NM_001033165 | Dnajc25       | -5410  | 59010455 | 59010655 |
| 4 | 59016065 | 59036271 + | NM_001033165 | Dnajc25       | 13880  | 59029945 | 59030145 |
| 4 | 59016065 | 59036271 + | NM_001033165 | Dnajc25       | -5869  | 59009996 | 59010196 |
| 4 | 59202422 | 59235706 + | NM_011673    | Ugcg          | 27192  | 59229614 | 59229814 |
| 4 | 59202422 | 59235706 + | NM_011673    | Ugcg          | 6886   | 59209308 | 59209508 |
| 4 | 59272923 | 59282017 + | NR_105031    | Gm12596       | 3555   | 59276478 | 59276678 |
| 4 | 59272923 | 59282017 + | NR_105031    | Gm12596       | 4094   | 59277017 | 59277217 |
| 4 | 59272923 | 59282017 + | NR_105031    | Gm12596       | -7111  | 59265612 | 59265812 |
| 4 | 59327555 | 59451506 - | NM_001163288 | Susd1         | 114134 | 59337172 | 59337372 |
| 4 | 59484740 | 59562237 - | NM_144904    | Ptbp3         | -3723  | 59565960 | 59566160 |
| 4 | 59484740 | 59562237 - | NM_144904    | Ptbp3         | 28773  | 59533264 | 59533464 |
| 4 | 59484740 | 59562237 - | NM_178164    | Ptbp3         | -3723  | 59565960 | 59566160 |
| 4 | 59484740 | 59562237 - | NM_178164    | Ptbp3         | 28773  | 59533264 | 59533464 |
| 4 | 59639083 | 59767176 + | NM_001015681 | E130308A19Rik | 19902  | 59658985 | 59659185 |
| 4 | 59639083 | 59734274 + | NM_153158    | E130308A19Rik | 19902  | 59658985 | 59659185 |
| 4 | 59782519 | 59796728 - | NM_001013577 | lnip          | -2949  | 59799677 | 59799877 |
| 4 | 59818522 | 59917613 + | NM_172468    | Snx30         | 8542   | 59827064 | 59827264 |
| 4 | 61850571 | 61869581 - | NM_001290350 | Zfp37         | 8097   | 61861284 | 61861484 |
| 4 | 61850571 | 61869581 - | NM_001290351 | Zfp37         | 8097   | 61861284 | 61861484 |
| 4 | 61850571 | 61869237 - | NM_001290353 | Zfp37         | 7753   | 61861284 | 61861484 |
| 4 | 61850571 | 61869581 - | NM_009554    | Zfp37         | 8097   | 61861284 | 61861484 |
| 4 | 62021735 | 62052804 + | NM_175090    | Slc31a1       | 23243  | 62044978 | 62045178 |
| 4 | 62021735 | 62052804 + | NM_175090    | Slc31a1       | 21628  | 62043363 | 62043563 |
| 4 | 62021735 | 62052804 + | NM_175090    | Slc31a1       | 22605  | 62044340 | 62044540 |
| 4 | 62021735 | 62052804 + | NM_175090    | Slc31a1       | 13078  | 62034813 | 62035013 |
| 4 | 62160088 | 62163235 - | NM_024257    | Hdhd3         | -910   | 62164145 | 62164345 |
| 4 | 62160088 | 62163235 - | NM_024257    | Hdhd3         | -1923  | 62165158 | 62165358 |
| 4 | 62160088 | 62163235 - | NM_024257    | Hdhd3         | 1025   | 62162010 | 62162210 |
| 4 | 62167018 | 62180944 - | NM_001276446 | Alad          | 2727   | 62178017 | 62178217 |
| 4 | 62167018 | 62180944 - | NM_001276446 | Alad          | -2934  | 62183878 | 62184078 |

|   |          |            |              |               |        |          |          |
|---|----------|------------|--------------|---------------|--------|----------|----------|
| 4 | 62167018 | 62181098 - | NM_008525    | Alad          | 2881   | 62178017 | 62178217 |
| 4 | 62167018 | 62181098 - | NM_008525    | Alad          | -2780  | 62183878 | 62184078 |
| 4 | 62184835 | 62186049 - | NM_021498    | Pole3         | 1971   | 62183878 | 62184078 |
| 4 | 62186403 | 62209028 + | NM_177607    | 4933430I17Rik | -8186  | 62178017 | 62178217 |
| 4 | 62186403 | 62209028 + | NM_177607    | 4933430I17Rik | -2325  | 62183878 | 62184078 |
| 4 | 62220881 | 62320882 + | NM_019492    | Rgs3          | 58036  | 62278917 | 62279117 |
| 4 | 62220881 | 62320882 + | NM_019492    | Rgs3          | 75127  | 62296008 | 62296208 |
| 4 | 62220881 | 62320882 + | NM_019492    | Rgs3          | 179    | 62221060 | 62221260 |
| 4 | 62220881 | 62320882 + | NM_019492    | Rgs3          | 25219  | 62246100 | 62246300 |
| 4 | 62280706 | 62320882 + | NM_001081650 | Rgs3          | -1589  | 62278917 | 62279117 |
| 4 | 62280706 | 62320882 + | NM_001081650 | Rgs3          | 15302  | 62296008 | 62296208 |
| 4 | 62280706 | 62364054 + | NM_134257    | Rgs3          | -1589  | 62278917 | 62279117 |
| 4 | 62280706 | 62364054 + | NM_134257    | Rgs3          | 48985  | 62329691 | 62329891 |
| 4 | 62280706 | 62364054 + | NM_134257    | Rgs3          | 15302  | 62296008 | 62296208 |
| 4 | 62335008 | 62364054 + | NM_001310706 | Rgs3          | -5117  | 62329691 | 62329891 |
| 4 | 63268125 | 63283464 - | NM_029324    | 1700018C11Rik | -3197  | 63286661 | 63286861 |
| 4 | 63385637 | 63406148 - | NM_177371    | Tnfsf15       | -385   | 63406533 | 63406733 |
| 4 | 63385637 | 63406148 - | NM_177371    | Tnfsf15       | 6361   | 63399587 | 63399787 |
| 4 | 65041837 | 66065518 - | NM_019514    | Astn2         | 797096 | 65268222 | 65268422 |
| 4 | 65041837 | 66065518 - | NM_207109    | Astn2         | 797096 | 65268222 | 65268422 |
| 4 | 65266020 | 65277275 + | NM_001161782 | Trim32        | 2202   | 65268222 | 65268422 |
| 4 | 65266020 | 65277275 + | NM_053084    | Trim32        | 2202   | 65268222 | 65268422 |
| 4 | 69884058 | 70071402 - | NM_145990    | Cdk5rap2      | 32058  | 70039144 | 70039344 |
| 4 | 69884058 | 70071402 - | NM_145990    | Cdk5rap2      | 11822  | 70059380 | 70059580 |
| 4 | 70092961 | 70195963 - | NM_172694    | Megf9         | 66218  | 70129545 | 70129745 |
| 4 | 71770979 | 71861928 - | NM_001285529 | Tle1          | 75826  | 71785902 | 71786102 |
| 4 | 71770979 | 71861928 - | NM_001285529 | Tle1          | 62017  | 71799711 | 71799911 |
| 4 | 71770979 | 71861928 - | NM_001285530 | Tle1          | 75826  | 71785902 | 71786102 |
| 4 | 71770979 | 71861928 - | NM_001285530 | Tle1          | 62017  | 71799711 | 71799911 |
| 4 | 71770979 | 71861928 - | NM_011599    | Tle1          | 75826  | 71785902 | 71786102 |

|   |          |            |              |         |         |          |          |
|---|----------|------------|--------------|---------|---------|----------|----------|
| 4 | 71770979 | 71861928 - | NM_011599    | Tle1    | 62017   | 71799711 | 71799911 |
| 4 | 73360483 | 73436507 - | NM_001017427 | Rasef   | 1804    | 73434503 | 73434703 |
| 4 | 73360483 | 73436507 - | NM_001017427 | Rasef   | 23766   | 73412541 | 73412741 |
| 4 | 73360483 | 73436507 - | NM_001017427 | Rasef   | 13340   | 73422967 | 73423167 |
| 4 | 73360483 | 73436507 - | NM_001017427 | Rasef   | 16133   | 73420174 | 73420374 |
| 4 | 73437148 | 73444283 + | NR_046041    | Gm11240 | -2445   | 73434503 | 73434703 |
| 4 | 73437148 | 73444283 + | NR_046042    | Gm11240 | -2445   | 73434503 | 73434703 |
| 4 | 75587141 | 77857800 - | NM_011211    | Ptprd   | 1884403 | 75973197 | 75973397 |
| 4 | 75587141 | 77857800 - | NM_011211    | Ptprd   | 1770892 | 76086708 | 76086908 |
| 4 | 75587141 | 77857800 - | NM_011211    | Ptprd   | 1815464 | 76042136 | 76042336 |
| 4 | 75587141 | 77857800 - | NM_011211    | Ptprd   | 1786279 | 76071321 | 76071521 |
| 4 | 75587141 | 77857800 - | NM_011211    | Ptprd   | 1830649 | 76026951 | 76027151 |
| 4 | 75587141 | 77857800 - | NM_011211    | Ptprd   | 1970520 | 75887080 | 75887280 |
| 4 | 75587141 | 77857800 - | NM_011211    | Ptprd   | 1905558 | 75952042 | 75952242 |
| 4 | 75587141 | 77857800 - | NM_011211    | Ptprd   | 2088898 | 75768702 | 75768902 |
| 4 | 80556590 | 80600206 + | NM_026821    | Lurap1l | 31446   | 80588036 | 80588236 |
| 4 | 80556590 | 80600206 + | NM_026821    | Lurap1l | 39613   | 80596203 | 80596403 |
| 4 | 80556590 | 80600206 + | NM_026821    | Lurap1l | 39106   | 80595696 | 80595896 |
| 4 | 80924403 | 81088720 - | NM_001305284 | Mpdz    | 46098   | 81042422 | 81042622 |
| 4 | 80924403 | 81088720 - | NM_001305286 | Mpdz    | 46098   | 81042422 | 81042622 |
| 4 | 80924403 | 81088720 - | NM_010820    | Mpdz    | 46098   | 81042422 | 81042622 |
| 4 | 81936077 | 82151684 - | NM_001113209 | Nfib    | 119827  | 82031657 | 82031857 |
| 4 | 81936077 | 82151684 - | NM_001113210 | Nfib    | 119827  | 82031657 | 82031857 |
| 4 | 81936077 | 82151684 - | NM_001286127 | Nfib    | 119827  | 82031657 | 82031857 |
| 4 | 81936077 | 82151684 - | NM_001286131 | Nfib    | 119827  | 82031657 | 82031857 |
| 4 | 81936077 | 82151684 - | NM_008687    | Nfib    | 119827  | 82031657 | 82031857 |
| 4 | 82444642 | 82505566 - | NM_026647    | Zdhhc21 | 8676    | 82496690 | 82496890 |
| 4 | 82866205 | 82970094 - | NM_027238    | Ttc39b  | 29130   | 82940764 | 82940964 |
| 4 | 83171449 | 83510575 + | NM_001081012 | Ccdc171 | 8353    | 83179802 | 83180002 |
| 4 | 83918446 | 84320991 - | NM_172870    | Bnc2    | 267323  | 84053468 | 84053668 |

|   |          |            |              |         |        |          |          |
|---|----------|------------|--------------|---------|--------|----------|----------|
| 4 | 84851360 | 85035284 + | NM_019535    | Sh3gl2  | 40925  | 84892285 | 84892485 |
| 4 | 84851360 | 85035284 + | NM_019535    | Sh3gl2  | 182969 | 85034329 | 85034529 |
| 4 | 84851360 | 85035284 + | NM_019535    | Sh3gl2  | 179855 | 85031215 | 85031415 |
| 4 | 84851360 | 85035284 + | NM_019535    | Sh3gl2  | -233   | 84850927 | 84851127 |
| 4 | 84851360 | 85035284 + | NM_019535    | Sh3gl2  | -3206  | 84847954 | 84848154 |
| 4 | 86221577 | 86223188 + | NM_178376    | Rraga   | -180   | 86221197 | 86221397 |
| 4 | 86394459 | 86496507 + | NM_184088    | Dennd4c | 83465  | 86477924 | 86478124 |
| 4 | 86394459 | 86496507 + | NM_184088    | Dennd4c | 13888  | 86408347 | 86408547 |
| 4 | 86520318 | 86566788 + | NM_001290541 | Acer2   | 11885  | 86532203 | 86532403 |
| 4 | 86520318 | 86578395 + | NM_001290543 | Acer2   | 11885  | 86532203 | 86532403 |
| 4 | 86520318 | 86566788 + | NM_139306    | Acer2   | 11885  | 86532203 | 86532403 |
| 4 | 86629030 | 86873868 - | NM_001110240 | Slc24a2 | 145051 | 86728617 | 86728817 |
| 4 | 86629030 | 86876445 - | NM_172426    | Slc24a2 | 147628 | 86728617 | 86728817 |
| 4 | 87415829 | 87679312 - | NM_027326    | Mllt3   | 121935 | 87557177 | 87557377 |
| 4 | 87415829 | 87679312 - | NM_027326    | Mllt3   | -408   | 87679720 | 87679920 |
| 4 | 87415829 | 87679312 - | NM_027326    | Mllt3   | 195128 | 87483984 | 87484184 |
| 4 | 88273224 | 88280091 - | NM_198663    | C87499  | -6870  | 88286961 | 88287161 |
| 4 | 88273224 | 88280091 - | NR_027385    | C87499  | -6870  | 88286961 | 88287161 |
| 4 | 88556461 | 88556567 - | NR_029747    | Mir31   | 216    | 88556151 | 88556351 |
| 4 | 88556461 | 88556567 - | NR_029747    | Mir31   | -7391  | 88563958 | 88564158 |
| 4 | 88556461 | 88556567 - | NR_029747    | Mir31   | 1978   | 88554389 | 88554589 |
| 4 | 88783274 | 88826995 + | NM_024433    | Mtap    | 7573   | 88790847 | 88791047 |
| 4 | 88920377 | 88928097 - | NM_001040654 | Cdkn2a  | 83     | 88927814 | 88928014 |
| 4 | 88920377 | 88940524 - | NM_009877    | Cdkn2a  | 12510  | 88927814 | 88928014 |
| 4 | 94405980 | 94541668 + | NM_001290549 | Tek     | 14089  | 94420069 | 94420269 |
| 4 | 94405980 | 94541668 + | NM_001290551 | Tek     | 14089  | 94420069 | 94420269 |
| 4 | 94405980 | 94541668 + | NM_013690    | Tek     | 14089  | 94420069 | 94420269 |
| 4 | 94715727 | 94718914 - | NM_010591    | Jun     | -1104  | 94720018 | 94720218 |
| 4 | 94715727 | 94718914 - | NM_010591    | Jun     | 0      | 94718814 | 94719014 |
| 4 | 96182829 | 96220343 - | NM_010008    | Cyp2j6  | -6899  | 96227242 | 96227442 |

|   |          |            |              |        |        |          |          |
|---|----------|------------|--------------|--------|--------|----------|----------|
| 4 | 96294123 | 96330811 - | NM_010007    | Cyp2j5 | -1093  | 96331904 | 96332104 |
| 4 | 97248634 | 97785568 + | NM_001122952 | Nfia   | 525162 | 97773796 | 97773996 |
| 4 | 97248634 | 97785568 + | NM_001122952 | Nfia   | 258386 | 97507020 | 97507220 |
| 4 | 97248634 | 97785568 + | NM_001122952 | Nfia   | 464705 | 97713339 | 97713539 |
| 4 | 97248634 | 97785568 + | NM_001122952 | Nfia   | 189960 | 97438594 | 97438794 |
| 4 | 97444317 | 97785568 + | NM_001122953 | Nfia   | 329479 | 97773796 | 97773996 |
| 4 | 97444317 | 97785568 + | NM_001122953 | Nfia   | 62703  | 97507020 | 97507220 |
| 4 | 97444317 | 97785568 + | NM_001122953 | Nfia   | 269022 | 97713339 | 97713539 |
| 4 | 97444317 | 97785568 + | NM_001122953 | Nfia   | -5523  | 97438594 | 97438794 |
| 4 | 97444317 | 97785568 + | NM_010905    | Nfia   | 329479 | 97773796 | 97773996 |
| 4 | 97444317 | 97785568 + | NM_010905    | Nfia   | 62703  | 97507020 | 97507220 |
| 4 | 97444317 | 97785568 + | NM_010905    | Nfia   | 269022 | 97713339 | 97713539 |
| 4 | 97444317 | 97785568 + | NM_010905    | Nfia   | -5523  | 97438594 | 97438794 |
| 4 | 98062517 | 98164325 + | NM_001005784 | Inadl  | 4702   | 98067219 | 98067419 |
| 4 | 98062517 | 98386295 + | NM_172696    | Inadl  | 257100 | 98319617 | 98319817 |
| 4 | 98062517 | 98386295 + | NM_172696    | Inadl  | 297781 | 98360298 | 98360498 |
| 4 | 98062517 | 98386295 + | NM_172696    | Inadl  | 4702   | 98067219 | 98067419 |
| 4 | 98213325 | 98355702 + | NM_001005787 | Inadl  | 106292 | 98319617 | 98319817 |
| 4 | 98213325 | 98386295 + | NM_007704    | Inadl  | 106292 | 98319617 | 98319817 |
| 4 | 98213325 | 98386295 + | NM_007704    | Inadl  | 146973 | 98360298 | 98360498 |
| 4 | 98393445 | 98405178 + | NM_001081202 | L1td1  | 2017   | 98395462 | 98395662 |
| 4 | 98590501 | 98602234 + | NM_001301414 | Usp1   | -5390  | 98584911 | 98585111 |
| 4 | 98590501 | 98602234 + | NM_146144    | Usp1   | -5390  | 98584911 | 98585111 |
| 4 | 98603350 | 98787607 - | NM_001290636 | Dock7  | 110036 | 98677371 | 98677571 |
| 4 | 98603350 | 98787607 - | NM_026082    | Dock7  | 110036 | 98677371 | 98677571 |
| 4 | 98860625 | 98926479 + | NM_175029    | Atg4c  | 345    | 98860970 | 98861170 |
| 4 | 98860625 | 98926479 + | NM_175029    | Atg4c  | 59146  | 98919771 | 98919971 |
| 4 | 98860838 | 98926479 + | NM_001145967 | Atg4c  | 132    | 98860970 | 98861170 |
| 4 | 98860838 | 98926479 + | NM_001145967 | Atg4c  | 58933  | 98919771 | 98919971 |
| 4 | 99602056 | 99659900 + | NM_028132    | Pgm2   | 12491  | 99614547 | 99614747 |

|   |           |             |              |               |        |           |           |
|---|-----------|-------------|--------------|---------------|--------|-----------|-----------|
| 4 | 99602056  | 99659900 +  | NM_028132    | Pgm2          | 18536  | 99620592  | 99620792  |
| 4 | 99768396  | 100115151 + | NM_013845    | Ror1          | 136888 | 99905284  | 99905484  |
| 4 | 100449284 | 100676354 + | NM_198037    | Cachd1        | 13492  | 100462776 | 100462976 |
| 4 | 100449284 | 100676354 + | NM_198037    | Cachd1        | 201625 | 100650909 | 100651109 |
| 4 | 100449284 | 100676354 + | NM_198037    | Cachd1        | 51702  | 100500986 | 100501186 |
| 4 | 100449284 | 100676354 + | NM_198037    | Cachd1        | 117140 | 100566424 | 100566624 |
| 4 | 100449284 | 100676354 + | NM_198037    | Cachd1        | 37559  | 100486843 | 100487043 |
| 4 | 100449284 | 100676354 + | NM_198037    | Cachd1        | 1317   | 100450601 | 100450801 |
| 4 | 100824579 | 100937888 - | NM_146145    | Jak1          | 26013  | 100911675 | 100911875 |
| 4 | 100824579 | 100937888 - | NM_146145    | Jak1          | 37552  | 100900136 | 100900336 |
| 4 | 101026388 | 101071791 + | NR_040640    | 0610043K17Rik | 13840  | 101040228 | 101040428 |
| 4 | 101320388 | 101331964 + | NM_175036    | Leprot        | 1256   | 101321644 | 101321844 |
| 4 | 101927347 | 102228530 + | NM_001177983 | Pde4b         | 191882 | 102119229 | 102119429 |
| 4 | 101927347 | 102228530 + | NM_001177983 | Pde4b         | 188698 | 102116045 | 102116245 |
| 4 | 101927544 | 102279868 + | NM_019840    | Pde4b         | 191685 | 102119229 | 102119429 |
| 4 | 101927544 | 102279868 + | NM_019840    | Pde4b         | 188501 | 102116045 | 102116245 |
| 4 | 102903051 | 102963469 - | NM_001163494 | 4921539E11Rik | 41104  | 102922165 | 102922365 |
| 4 | 102903051 | 102963469 - | NM_001163494 | 4921539E11Rik | 26739  | 102936530 | 102936730 |
| 4 | 102903051 | 102963469 - | NM_027612    | 4921539E11Rik | 41104  | 102922165 | 102922365 |
| 4 | 102903051 | 102963469 - | NM_027612    | 4921539E11Rik | 26739  | 102936530 | 102936730 |
| 4 | 104040143 | 104352995 + | NM_010014    | Dab1          | 3465   | 104043608 | 104043808 |
| 4 | 104040143 | 104352995 + | NM_010014    | Dab1          | 120466 | 104160609 | 104160809 |
| 4 | 104040143 | 104352995 + | NM_010014    | Dab1          | 162798 | 104202941 | 104203141 |
| 4 | 104040143 | 104352995 + | NM_010014    | Dab1          | 95431  | 104135574 | 104135774 |
| 4 | 104040143 | 104417450 + | NM_177259    | Dab1          | 3465   | 104043608 | 104043808 |
| 4 | 104040143 | 104417450 + | NM_177259    | Dab1          | 120466 | 104160609 | 104160809 |
| 4 | 104040143 | 104417450 + | NM_177259    | Dab1          | 162798 | 104202941 | 104203141 |
| 4 | 104040143 | 104417450 + | NM_177259    | Dab1          | 95431  | 104135574 | 104135774 |
| 4 | 104040143 | 104417450 + | NR_104385    | Dab1          | 3465   | 104043608 | 104043808 |
| 4 | 104040143 | 104417450 + | NR_104385    | Dab1          | 120466 | 104160609 | 104160809 |



|   |           |             |              |               |        |           |           |
|---|-----------|-------------|--------------|---------------|--------|-----------|-----------|
| 4 | 104040143 | 104417450 + | NR_104385    | Dab1          | 162798 | 104202941 | 104203141 |
| 4 | 104040143 | 104417450 + | NR_104385    | Dab1          | 95431  | 104135574 | 104135774 |
| 4 | 104438922 | 104477154 + | NM_133882    | C8b           | 25904  | 104464826 | 104465026 |
| 4 | 104586061 | 104689469 + | NM_001162980 | 1700024P16Rik | 95364  | 104681425 | 104681625 |
| 4 | 104586061 | 104689469 + | NM_001285952 | 1700024P16Rik | 95364  | 104681425 | 104681625 |
| 4 | 104586061 | 104689469 + | NM_001285953 | 1700024P16Rik | 95364  | 104681425 | 104681625 |
| 4 | 104586061 | 104689469 + | NR_104376    | 1700024P16Rik | 95364  | 104681425 | 104681625 |
| 4 | 104829952 | 104905373 + | NM_080555    | Ppap2b        | 39929  | 104869881 | 104870081 |
| 4 | 106233643 | 106261719 + | NM_053272    | Dhcr24        | 21810  | 106255453 | 106255653 |
| 4 | 106233643 | 106261719 + | NM_053272    | Dhcr24        | 20758  | 106254401 | 106254601 |
| 4 | 106263514 | 106289844 - | NM_183182    | BC055111      | -4397  | 106294241 | 106294441 |
| 4 | 106295054 | 106312793 + | NM_177667    | Ttc22         | -613   | 106294241 | 106294441 |
| 4 | 106334413 | 106351292 - | NM_001172073 | Ttc4          | -9994  | 106361286 | 106361486 |
| 4 | 106334413 | 106351550 - | NM_028209    | Ttc4          | -9736  | 106361286 | 106361486 |
| 4 | 106353022 | 106400536 - | NM_001126487 | Mroh7         | 39050  | 106361286 | 106361486 |
| 4 | 106353022 | 106400536 - | NM_001126487 | Mroh7         | -5399  | 106405935 | 106406135 |
| 4 | 106406520 | 106420898 + | NM_146149    | Fam151a       | -385   | 106405935 | 106406135 |
| 4 | 106417166 | 106472437 - | NM_025590    | Acot11        | 19743  | 106452494 | 106452694 |
| 4 | 106584075 | 106722300 + | NM_023672    | Ssbp3         | -2446  | 106581429 | 106581629 |
| 4 | 106584075 | 106722300 + | NM_023672    | Ssbp3         | 96789  | 106680864 | 106681064 |
| 4 | 106584075 | 106722300 + | NM_198438    | Ssbp3         | -2446  | 106581429 | 106581629 |
| 4 | 106584075 | 106722300 + | NM_198438    | Ssbp3         | 96789  | 106680864 | 106681064 |
| 4 | 106806767 | 106850972 - | NM_025617    | Tceanc2       | 17949  | 106832823 | 106833023 |
| 4 | 106806767 | 106850972 - | NM_025617    | Tceanc2       | -4527  | 106855499 | 106855699 |
| 4 | 106851235 | 106873602 + | NM_029565    | Tmem59        | 4264   | 106855499 | 106855699 |
| 4 | 106906119 | 106926139 - | NM_029985    | Lrrc42        | 15008  | 106910931 | 106911131 |
| 4 | 106964070 | 106979749 - | NM_007860    | Dio1          | 14498  | 106965051 | 106965251 |
| 4 | 106986968 | 107032429 + | NM_001205156 | Yipf1         | 8615   | 106995583 | 106995783 |
| 4 | 106986968 | 107032429 + | NM_001205156 | Yipf1         | 14798  | 107001766 | 107001966 |
| 4 | 106986968 | 107032429 + | NM_145550    | Yipf1         | 8615   | 106995583 | 106995783 |

|   |           |             |              |               |         |           |           |
|---|-----------|-------------|--------------|---------------|---------|-----------|-----------|
| 4 | 106986968 | 107032429 + | NM_145550    | Yipf1         | 14798   | 107001766 | 107001966 |
| 4 | 107107324 | 107307665 + | NM_147221    | Glis1         | 131724  | 107239048 | 107239248 |
| 4 | 107576587 | 107596195 - | NM_009949    | Cpt2          | 2175    | 107593820 | 107594020 |
| 4 | 107716435 | 107791153 - | NM_011327    | Scp2          | 51893   | 107739060 | 107739260 |
| 4 | 108000757 | 108013324 + | NM_027250    | Coa7          | 3922    | 108004679 | 108004879 |
| 4 | 108000757 | 108013324 + | NM_027250    | Coa7          | -827    | 107999730 | 107999930 |
| 4 | 108000757 | 108013324 + | NM_027250    | Coa7          | -546    | 108000011 | 108000211 |
| 4 | 108040382 | 108056261 - | NM_001099303 | Fam159a       | -7526   | 108063787 | 108063987 |
| 4 | 108040382 | 108056261 - | NM_001099303 | Fam159a       | -9009   | 108065270 | 108065470 |
| 4 | 108040382 | 108056261 - | NM_001099303 | Fam159a       | 12934   | 108043127 | 108043327 |
| 4 | 108132031 | 108232021 + | NM_175472    | Zcchc11       | -796    | 108131035 | 108131235 |
| 4 | 108551675 | 108615930 + | NM_023537    | Rab3b         | 64010   | 108615685 | 108615885 |
| 4 | 108615448 | 108644683 - | NR_040664    | 8030443G20Rik | 28798   | 108615685 | 108615885 |
| 4 | 108891018 | 108927183 + | NM_001285895 | Calr4         | 1091    | 108892109 | 108892309 |
| 4 | 108891018 | 108927183 + | NM_001285895 | Calr4         | 6861    | 108897879 | 108898079 |
| 4 | 108907090 | 108927183 + | NM_001285896 | Calr4         | -9011   | 108897879 | 108898079 |
| 4 | 108907867 | 108927183 + | NM_001285897 | Calr4         | -9788   | 108897879 | 108898079 |
| 4 | 108907867 | 108927183 + | NM_001285898 | Calr4         | -9788   | 108897879 | 108898079 |
| 4 | 109074884 | 109078863 - | NR_131195    | Ttc39aos1     | 0       | 109078827 | 109079027 |
| 4 | 109074884 | 109078863 - | NR_131195    | Ttc39aos1     | -8282   | 109087145 | 109087345 |
| 4 | 109079705 | 109117351 + | NM_153392    | Ttc39a        | -678    | 109078827 | 109079027 |
| 4 | 109079705 | 109117351 + | NM_153392    | Ttc39a        | 7440    | 109087145 | 109087345 |
| 4 | 109088252 | 109117351 + | NM_001145948 | Ttc39a        | -9225   | 109078827 | 109079027 |
| 4 | 109088252 | 109117351 + | NM_001145948 | Ttc39a        | -907    | 109087145 | 109087345 |
| 4 | 109349232 | 109636566 + | NM_007983    | Faf1          | 55506   | 109404738 | 109404938 |
| 4 | 110070303 | 111330125 + | NM_001048189 | Agbl4         | 1085245 | 111155548 | 111155748 |
| 4 | 110070303 | 111330125 + | NM_001048189 | Agbl4         | 1054615 | 111124918 | 111125118 |
| 4 | 110070303 | 111335630 + | NM_001284190 | Agbl4         | 1085245 | 111155548 | 111155748 |
| 4 | 110070303 | 111335630 + | NM_001284190 | Agbl4         | 1054615 | 111124918 | 111125118 |
| 4 | 110070303 | 111330125 + | NM_030231    | Agbl4         | 1085245 | 111155548 | 111155748 |

|   |           |             |              |            |         |           |           |
|---|-----------|-------------|--------------|------------|---------|-----------|-----------|
| 4 | 110070303 | 111330125 + | NM_030231    | Agbl4      | 1054615 | 111124918 | 111125118 |
| 4 | 111087611 | 111132904 + | NM_026279    | Bend5      | 37307   | 111124918 | 111125118 |
| 4 | 111087611 | 111132904 + | NR_033793    | Bend5      | 37307   | 111124918 | 111125118 |
| 4 | 111547982 | 111575402 - | NM_145551    | Slc5a9     | 16304   | 111558898 | 111559098 |
| 4 | 111547982 | 111575402 - | NM_145551    | Slc5a9     | 10295   | 111564907 | 111565107 |
| 4 | 111547982 | 111575402 - | NM_145551    | Slc5a9     | 14759   | 111560443 | 111560643 |
| 4 | 112477221 | 112959579 - | NM_001103199 | Skint6     | 22903   | 112936476 | 112936676 |
| 4 | 114079329 | 114287704 + | NM_001085549 | Trabd2b    | 5995    | 114085324 | 114085524 |
| 4 | 114578885 | 114581504 - | NM_008593    | Foxd2      | -5999   | 114587503 | 114587703 |
| 4 | 114581894 | 114593724 + | NR_030721    | Foxd2os    | 5609    | 114587503 | 114587703 |
| 4 | 114672723 | 114715804 + | NM_001304551 | Stil       | 5882    | 114678605 | 114678805 |
| 4 | 114672723 | 114715804 + | NM_001304551 | Stil       | 1541    | 114674264 | 114674464 |
| 4 | 114672723 | 114715804 + | NM_001304553 | Stil       | 5882    | 114678605 | 114678805 |
| 4 | 114672723 | 114715804 + | NM_001304553 | Stil       | 1541    | 114674264 | 114674464 |
| 4 | 114672723 | 114715804 + | NM_001304555 | Stil       | 5882    | 114678605 | 114678805 |
| 4 | 114672723 | 114715804 + | NM_001304555 | Stil       | 1541    | 114674264 | 114674464 |
| 4 | 114672723 | 114715804 + | NM_001304559 | Stil       | 5882    | 114678605 | 114678805 |
| 4 | 114672723 | 114715804 + | NM_001304559 | Stil       | 1541    | 114674264 | 114674464 |
| 4 | 114672723 | 114715804 + | NM_009185    | Stil       | 5882    | 114678605 | 114678805 |
| 4 | 114672723 | 114715804 + | NM_009185    | Stil       | 1541    | 114674264 | 114674464 |
| 4 | 114781287 | 114806583 - | NM_001003947 | Cyp4x1     | 22417   | 114783966 | 114784166 |
| 4 | 115254643 | 115255733 - | NR_033575    | Cyp4b1-ps2 | -28     | 115255761 | 115255961 |
| 4 | 115297333 | 115320311 - | NM_007823    | Cyp4b1     | 4354    | 115315757 | 115315957 |
| 4 | 115297333 | 115320311 - | NM_007823    | Cyp4b1     | -366    | 115320677 | 115320877 |
| 4 | 115410678 | 115449933 + | NM_172698    | Efcab14    | 5162    | 115415840 | 115416040 |
| 4 | 115410678 | 115449933 + | NM_172698    | Efcab14    | -5549   | 115404929 | 115405129 |
| 4 | 115410678 | 115449933 + | NM_172698    | Efcab14    | -4786   | 115405692 | 115405892 |
| 4 | 115500697 | 115508789 + | NM_175308    | Mob3c      | 4620    | 115505317 | 115505517 |
| 4 | 115511803 | 115551862 + | NM_001285487 | Mknk1      | 10141   | 115521944 | 115522144 |
| 4 | 115511803 | 115551862 + | NM_001285487 | Mknk1      | -6286   | 115505317 | 115505517 |

|   |           |             |              |               |       |           |           |
|---|-----------|-------------|--------------|---------------|-------|-----------|-----------|
| 4 | 115511803 | 115551862 + | NM_001285488 | Mknk1         | 10141 | 115521944 | 115522144 |
| 4 | 115511803 | 115551862 + | NM_001285488 | Mknk1         | -6286 | 115505317 | 115505517 |
| 4 | 115511803 | 115551862 + | NM_021461    | Mknk1         | 10141 | 115521944 | 115522144 |
| 4 | 115511803 | 115551862 + | NM_021461    | Mknk1         | -6286 | 115505317 | 115505517 |
| 4 | 115669261 | 115690508 - | NM_010173    | Faah          | -1994 | 115692502 | 115692702 |
| 4 | 115769560 | 115796295 - | NM_001122958 | Rad54l        | -826  | 115797121 | 115797321 |
| 4 | 115769560 | 115796296 - | NM_001122959 | Rad54l        | -825  | 115797121 | 115797321 |
| 4 | 115769560 | 115796295 - | NM_009015    | Rad54l        | -826  | 115797121 | 115797321 |
| 4 | 115796445 | 115811447 + | NR_131048    | 2510003B16Rik | 676   | 115797121 | 115797321 |
| 4 | 115834486 | 115840204 - | NM_133681    | Tspan1        | -6788 | 115846992 | 115847192 |
| 4 | 115845977 | 115846903 + | NM_001099295 | 1700042G07Rik | 1015  | 115846992 | 115847192 |
| 4 | 115979365 | 116136787 - | NM_001042743 | Mast2         | 8281  | 116128306 | 116128506 |
| 4 | 115979365 | 116136787 - | NM_001042743 | Mast2         | 14996 | 116121591 | 116121791 |
| 4 | 115979365 | 116136787 - | NM_008641    | Mast2         | 8281  | 116128306 | 116128506 |
| 4 | 115979365 | 116136787 - | NM_008641    | Mast2         | 14996 | 116121591 | 116121791 |
| 4 | 116224133 | 116228549 - | NM_177670    | Tmem69        | 127   | 116228222 | 116228422 |
| 4 | 116230332 | 116266488 + | NM_029868    | Gpbp1l1       | -1910 | 116228222 | 116228422 |
| 4 | 116230332 | 116266488 + | NM_029868    | Gpbp1l1       | 19287 | 116249619 | 116249819 |
| 4 | 116262338 | 116270236 - | NR_029450    | C530005A16Rik | 2001  | 116268035 | 116268235 |
| 4 | 116269335 | 116272872 + | NM_001037916 | Ccdc17        | -1100 | 116268035 | 116268235 |
| 4 | 116309115 | 116324280 - | NM_021473    | Akr1a1        | -1310 | 116325590 | 116325790 |
| 4 | 116309115 | 116324280 - | NM_021473    | Akr1a1        | 4596  | 116319484 | 116319684 |
| 4 | 116357570 | 116358628 - | NR_040442    | AV051173      | 1841  | 116356587 | 116356787 |
| 4 | 116358204 | 116372606 + | NM_011034    | Prdx1         | -1417 | 116356587 | 116356787 |
| 4 | 116393560 | 116476854 + | NM_146151    | Tesk2         | 10077 | 116403637 | 116403837 |
| 4 | 116393560 | 116476854 + | NM_146151    | Tesk2         | 44503 | 116438063 | 116438263 |
| 4 | 116393560 | 116476854 + | NM_146151    | Tesk2         | 75623 | 116469183 | 116469383 |
| 4 | 116393560 | 116476854 + | NM_146151    | Tesk2         | 29214 | 116422774 | 116422974 |
| 4 | 116393560 | 116476854 + | NM_146151    | Tesk2         | 1548  | 116395108 | 116395308 |
| 4 | 116393560 | 116476854 + | NM_146151    | Tesk2         | 6000  | 116399560 | 116399760 |

|   |           |             |              |        |        |           |           |
|---|-----------|-------------|--------------|--------|--------|-----------|-----------|
| 4 | 116393560 | 116476854 + | NM_146151    | Tesk2  | -519   | 116392841 | 116393041 |
| 4 | 116550007 | 116661711 + | NM_001029912 | Zswim5 | 50613  | 116600620 | 116600820 |
| 4 | 116832238 | 116851378 - | NM_001290662 | Kif2c  | -3472  | 116854850 | 116855050 |
| 4 | 116832241 | 116855230 - | NM_134471    | Kif2c  | 180    | 116854850 | 116855050 |
| 4 | 116885938 | 116924523 - | NM_001145637 | Gm1661 | 20085  | 116904238 | 116904438 |
| 4 | 116885938 | 116924523 - | NM_001145637 | Gm1661 | 16833  | 116907490 | 116907690 |
| 4 | 116887795 | 116924523 - | NM_001033774 | Gm1661 | 20085  | 116904238 | 116904438 |
| 4 | 116887795 | 116924523 - | NM_001033774 | Gm1661 | 16833  | 116907490 | 116907690 |
| 4 | 116944068 | 117048067 - | NM_001310729 | Rnf220 | 62206  | 116985661 | 116985861 |
| 4 | 116944068 | 117169658 - | NM_025739    | Rnf220 | 183797 | 116985661 | 116985861 |
| 4 | 116944068 | 117169658 - | NM_025739    | Rnf220 | 18638  | 117150820 | 117151020 |
| 4 | 117222929 | 117346903 + | NM_001285901 | Eri3   | 105350 | 117328279 | 117328479 |
| 4 | 117222929 | 117346903 + | NM_001285901 | Eri3   | 35459  | 117258388 | 117258588 |
| 4 | 117222929 | 117346903 + | NM_001285901 | Eri3   | 83881  | 117306810 | 117307010 |
| 4 | 117222929 | 117346903 + | NM_001285901 | Eri3   | 91588  | 117314517 | 117314717 |
| 4 | 117222929 | 117346903 + | NM_001285901 | Eri3   | 80165  | 117303094 | 117303294 |
| 4 | 117222929 | 117346903 + | NM_001285902 | Eri3   | 105350 | 117328279 | 117328479 |
| 4 | 117222929 | 117346903 + | NM_001285902 | Eri3   | 35459  | 117258388 | 117258588 |
| 4 | 117222929 | 117346903 + | NM_001285902 | Eri3   | 83881  | 117306810 | 117307010 |
| 4 | 117222929 | 117346903 + | NM_001285902 | Eri3   | 91588  | 117314517 | 117314717 |
| 4 | 117222929 | 117346903 + | NM_001285902 | Eri3   | 80165  | 117303094 | 117303294 |
| 4 | 117222970 | 117346903 + | NM_001285899 | Eri3   | 105309 | 117328279 | 117328479 |
| 4 | 117222970 | 117346903 + | NM_001285899 | Eri3   | 35418  | 117258388 | 117258588 |
| 4 | 117222970 | 117346903 + | NM_001285899 | Eri3   | 83840  | 117306810 | 117307010 |
| 4 | 117222970 | 117346903 + | NM_001285899 | Eri3   | 91547  | 117314517 | 117314717 |
| 4 | 117222970 | 117346903 + | NM_001285899 | Eri3   | 80124  | 117303094 | 117303294 |
| 4 | 117222970 | 117346903 + | NM_080469    | Eri3   | 105309 | 117328279 | 117328479 |
| 4 | 117222970 | 117346903 + | NM_080469    | Eri3   | 35418  | 117258388 | 117258588 |
| 4 | 117222970 | 117346903 + | NM_080469    | Eri3   | 83840  | 117306810 | 117307010 |
| 4 | 117222970 | 117346903 + | NM_080469    | Eri3   | 91547  | 117314517 | 117314717 |

|   |           |             |              |         |        |           |           |
|---|-----------|-------------|--------------|---------|--------|-----------|-----------|
| 4 | 117222970 | 117346903 + | NM_080469    | Eri3    | 80124  | 117303094 | 117303294 |
| 4 | 117347291 | 117354831 - | NM_023178    | Dmap1   | 326    | 117354305 | 117354505 |
| 4 | 117507863 | 117541911 + | NM_008135    | Slc6a9  | -4875  | 117502788 | 117502988 |
| 4 | 117507863 | 117541911 + | NM_008135    | Slc6a9  | -2824  | 117504839 | 117505039 |
| 4 | 117507863 | 117541911 + | NM_008135    | Slc6a9  | -5554  | 117502109 | 117502309 |
| 4 | 117598765 | 117602369 - | NM_001284191 | Artn    | -7587  | 117609956 | 117610156 |
| 4 | 117598765 | 117602369 - | NM_001284192 | Artn    | -7587  | 117609956 | 117610156 |
| 4 | 117598765 | 117602369 - | NM_001284193 | Artn    | -7587  | 117609956 | 117610156 |
| 4 | 117598765 | 117602369 - | NM_009711    | Artn    | -7587  | 117609956 | 117610156 |
| 4 | 117604758 | 117807552 - | NM_001161774 | St3gal3 | 197396 | 117609956 | 117610156 |
| 4 | 117604758 | 117807552 - | NM_001161774 | St3gal3 | 11735  | 117795617 | 117795817 |
| 4 | 117604758 | 117807552 - | NM_001161774 | St3gal3 | 7046   | 117800306 | 117800506 |
| 4 | 117604758 | 117807552 - | NM_001161774 | St3gal3 | 84923  | 117722429 | 117722629 |
| 4 | 117604758 | 117807552 - | NM_001285520 | St3gal3 | 197396 | 117609956 | 117610156 |
| 4 | 117604758 | 117807552 - | NM_001285520 | St3gal3 | 11735  | 117795617 | 117795817 |
| 4 | 117604758 | 117807552 - | NM_001285520 | St3gal3 | 7046   | 117800306 | 117800506 |
| 4 | 117604758 | 117807552 - | NM_001285520 | St3gal3 | 84923  | 117722429 | 117722629 |
| 4 | 117604758 | 117807552 - | NM_001285521 | St3gal3 | 197396 | 117609956 | 117610156 |
| 4 | 117604758 | 117807552 - | NM_001285521 | St3gal3 | 11735  | 117795617 | 117795817 |
| 4 | 117604758 | 117807552 - | NM_001285521 | St3gal3 | 7046   | 117800306 | 117800506 |
| 4 | 117604758 | 117807552 - | NM_001285521 | St3gal3 | 84923  | 117722429 | 117722629 |
| 4 | 117604758 | 117807552 - | NM_009176    | St3gal3 | 197396 | 117609956 | 117610156 |
| 4 | 117604758 | 117807552 - | NM_009176    | St3gal3 | 11735  | 117795617 | 117795817 |
| 4 | 117604758 | 117807552 - | NM_009176    | St3gal3 | 7046   | 117800306 | 117800506 |
| 4 | 117604758 | 117807552 - | NM_009176    | St3gal3 | 84923  | 117722429 | 117722629 |
| 4 | 117880818 | 117964003 - | NM_011213    | Ptprf   | 35823  | 117927980 | 117928180 |
| 4 | 117880818 | 117964003 - | NM_011213    | Ptprf   | 11932  | 117951871 | 117952071 |
| 4 | 117880818 | 117964003 - | NM_011213    | Ptprf   | 5573   | 117958230 | 117958430 |
| 4 | 117880818 | 117964003 - | NM_011213    | Ptprf   | 35335  | 117928468 | 117928668 |
| 4 | 117880818 | 117964003 - | NM_011213    | Ptprf   | 56739  | 117907064 | 117907264 |

|   |           |             |              |               |        |           |           |
|---|-----------|-------------|--------------|---------------|--------|-----------|-----------|
| 4 | 117880818 | 117964003 - | NM_011213    | Ptprf         | 48930  | 117914873 | 117915073 |
| 4 | 117880818 | 117964003 - | NM_011213    | Ptprf         | 40205  | 117923598 | 117923798 |
| 4 | 117880818 | 117964003 - | NM_011213    | Ptprf         | 50846  | 117912957 | 117913157 |
| 4 | 118032604 | 118035350 + | NM_026601    | Hyi           | -3060  | 118029344 | 118029544 |
| 4 | 118032604 | 118035350 + | NR_003946    | Hyi           | -3060  | 118029344 | 118029544 |
| 4 | 118100698 | 118105558 + | NM_001039175 | Elovl1        | 468    | 118101166 | 118101366 |
| 4 | 118100698 | 118105558 + | NM_019422    | Elovl1        | 468    | 118101166 | 118101366 |
| 4 | 118102306 | 118105558 + | NM_001039176 | Elovl1        | -940   | 118101166 | 118101366 |
| 4 | 118105506 | 118109949 - | NM_023223    | Cdc20         | -2454  | 118112403 | 118112603 |
| 4 | 118143796 | 118162455 - | NM_011587    | Tie1          | 9075   | 118153180 | 118153380 |
| 4 | 118199880 | 118202823 + | NM_025572    | 2610528J11Rik | -123   | 118199557 | 118199757 |
| 4 | 118213546 | 118216332 - | NM_172383    | Tmem125       | -4426  | 118220758 | 118220958 |
| 4 | 118227156 | 118293011 - | NM_026789    | Cfap57        | 51375  | 118241436 | 118241636 |
| 4 | 118781350 | 118809935 + | NM_011400    | Slc2a1        | 18889  | 118800239 | 118800439 |
| 4 | 118781350 | 118809935 + | NM_011400    | Slc2a1        | -5015  | 118776135 | 118776335 |
| 4 | 118949932 | 118967119 - | NM_011732    | Ybx1          | 1107   | 118965812 | 118966012 |
| 4 | 118949932 | 118967119 - | NM_011732    | Ybx1          | 8935   | 118957984 | 118958184 |
| 4 | 119212266 | 119301725 + | NM_001290696 | Foxj3         | 49764  | 119262030 | 119262230 |
| 4 | 119212266 | 119301725 + | NM_172699    | Foxj3         | 49764  | 119262030 | 119262230 |
| 4 | 119310337 | 119312071 + | NM_008190    | Guca2a        | 0      | 119310141 | 119310341 |
| 4 | 119329208 | 119331551 - | NM_008191    | Guca2b        | -6484  | 119338035 | 119338235 |
| 4 | 119329208 | 119331551 - | NM_008191    | Guca2b        | -982   | 119332533 | 119332733 |
| 4 | 119487283 | 119808017 + | NM_010657    | Hivep3        | 305550 | 119792833 | 119793033 |
| 4 | 119487283 | 119808017 + | NM_010657    | Hivep3        | 43205  | 119530488 | 119530688 |
| 4 | 119487283 | 119808017 + | NM_010657    | Hivep3        | 255020 | 119742303 | 119742503 |
| 4 | 119834029 | 119839966 + | NM_007902    | Edn2          | 5197   | 119839226 | 119839426 |
| 4 | 120077886 | 120202805 + | NM_001159630 | Scmh1         | 111247 | 120189133 | 120189333 |
| 4 | 120077886 | 120202805 + | NM_013883    | Scmh1         | 111247 | 120189133 | 120189333 |
| 4 | 120430040 | 120504185 - | NM_001048168 | Nfyc          | 24131  | 120479854 | 120480054 |
| 4 | 120430040 | 120498347 - | NM_001277095 | Nfyc          | 18293  | 120479854 | 120480054 |

|   |           |             |              |         |        |           |           |
|---|-----------|-------------|--------------|---------|--------|-----------|-----------|
| 4 | 120430040 | 120498347 - | NM_008692    | Nfyc    | 18293  | 120479854 | 120480054 |
| 4 | 120602742 | 120624307 - | NM_001005788 | Zfp69   | -9829  | 120634136 | 120634336 |
| 4 | 120640922 | 120689853 - | NM_133716    | Smapp2  | -6380  | 120696233 | 120696433 |
| 4 | 120640922 | 120689853 - | NM_133716    | Smapp2  | 30447  | 120659206 | 120659406 |
| 4 | 120817978 | 120861140 - | NM_001081013 | Rlf     | -838   | 120861978 | 120862178 |
| 4 | 122513470 | 122536419 + | NM_008917    | Ppt1    | -6052  | 122507218 | 122507418 |
| 4 | 122513470 | 122536419 + | NM_008917    | Ppt1    | 21456  | 122534926 | 122535126 |
| 4 | 122513470 | 122536419 + | NM_008917    | Ppt1    | -6766  | 122506504 | 122506704 |
| 4 | 122536291 | 122563301 - | NM_001301067 | Cap1    | -4210  | 122567511 | 122567711 |
| 4 | 122536291 | 122563301 - | NM_001301067 | Cap1    | 12756  | 122550345 | 122550545 |
| 4 | 122536291 | 122563301 - | NM_001301067 | Cap1    | 9193   | 122553908 | 122554108 |
| 4 | 122536291 | 122563301 - | NM_007598    | Cap1    | -4210  | 122567511 | 122567711 |
| 4 | 122536291 | 122563301 - | NM_007598    | Cap1    | 12756  | 122550345 | 122550545 |
| 4 | 122536291 | 122563301 - | NM_007598    | Cap1    | 9193   | 122553908 | 122554108 |
| 4 | 122624094 | 122638432 - | NM_029662    | Mfsd2a  | -2282  | 122640714 | 122640914 |
| 4 | 122624094 | 122638432 - | NM_029662    | Mfsd2a  | 6345   | 122631887 | 122632087 |
| 4 | 122693840 | 122732178 + | NM_025873    | Trit1   | 32667  | 122726507 | 122726707 |
| 4 | 123412438 | 123427543 - | NM_023423    | Akirin1 | 981    | 123426362 | 123426562 |
| 4 | 124419094 | 124478756 + | NM_008385    | Inpp5b  | 32221  | 124451315 | 124451515 |
| 4 | 124419094 | 124478756 + | NM_008385    | Inpp5b  | 10682  | 124429776 | 124429976 |
| 4 | 124419094 | 124478756 + | NM_008385    | Inpp5b  | 31636  | 124450730 | 124450930 |
| 4 | 124419094 | 124478756 + | NR_126474    | Inpp5b  | 32221  | 124451315 | 124451515 |
| 4 | 124419094 | 124478756 + | NR_126474    | Inpp5b  | 10682  | 124429776 | 124429976 |
| 4 | 124419094 | 124478756 + | NR_126474    | Inpp5b  | 31636  | 124450730 | 124450930 |
| 4 | 124479793 | 124527045 + | NM_008636    | Mtf1    | 3873   | 124483666 | 124483866 |
| 4 | 124479793 | 124527045 + | NM_008636    | Mtf1    | 15388  | 124495181 | 124495381 |
| 4 | 124479793 | 124527045 + | NM_008636    | Mtf1    | 2027   | 124481820 | 124482020 |
| 4 | 124663674 | 124686344 + | NM_138683    | Rspo1   | 16631  | 124680305 | 124680505 |
| 4 | 125168075 | 125391418 + | NM_001081097 | Grik3   | 146472 | 125314547 | 125314747 |
| 4 | 125735809 | 125766579 + | NM_172701    | Oscp1   | 22377  | 125758186 | 125758386 |



|   |           |             |              |               |       |           |           |
|---|-----------|-------------|--------------|---------------|-------|-----------|-----------|
| 4 | 125781201 | 125818274 + | NM_001145827 | Stk40         | -25   | 125780976 | 125781176 |
| 4 | 125781201 | 125818274 + | NM_028800    | Stk40         | -25   | 125780976 | 125781176 |
| 4 | 125827846 | 125840586 - | NM_001162533 | Sh3d21        | 4989  | 125835397 | 125835597 |
| 4 | 125827846 | 125840586 - | NM_001162533 | Sh3d21        | 822   | 125839564 | 125839764 |
| 4 | 125827846 | 125839910 - | NM_025856    | Sh3d21        | 4313  | 125835397 | 125835597 |
| 4 | 125827846 | 125839910 - | NM_025856    | Sh3d21        | 146   | 125839564 | 125839764 |
| 4 | 126287098 | 126291616 + | NM_001013755 | 5730409E04Rik | 1895  | 126288993 | 126289193 |
| 4 | 126287098 | 126291616 + | NM_001145950 | 5730409E04Rik | 1895  | 126288993 | 126289193 |
| 4 | 126354887 | 126386960 + | NM_011970    | Psmb2         | -88   | 126354599 | 126354799 |
| 4 | 126420994 | 126430674 - | NM_011986    | Ncdn          | -2881 | 126433555 | 126433755 |
| 4 | 126420994 | 126430674 - | NM_011986    | Ncdn          | -1284 | 126431958 | 126432158 |
| 4 | 126430799 | 126546939 + | NM_001035525 | AU040320      | 2756  | 126433555 | 126433755 |
| 4 | 126430799 | 126546939 + | NM_001035525 | AU040320      | 50025 | 126480824 | 126481024 |
| 4 | 126430799 | 126546939 + | NM_001035525 | AU040320      | 16632 | 126447431 | 126447631 |
| 4 | 126430799 | 126546939 + | NM_001035525 | AU040320      | 1159  | 126431958 | 126432158 |
| 4 | 126431014 | 126546939 + | NM_001035526 | AU040320      | 2541  | 126433555 | 126433755 |
| 4 | 126431014 | 126546939 + | NM_001035526 | AU040320      | 49810 | 126480824 | 126481024 |
| 4 | 126431014 | 126546939 + | NM_001035526 | AU040320      | 16417 | 126447431 | 126447631 |
| 4 | 126431014 | 126546939 + | NM_001035526 | AU040320      | 944   | 126431958 | 126432158 |
| 4 | 126431014 | 126531581 + | NM_133886    | AU040320      | 2541  | 126433555 | 126433755 |
| 4 | 126431014 | 126531581 + | NM_133886    | AU040320      | 49810 | 126480824 | 126481024 |
| 4 | 126431014 | 126531581 + | NM_133886    | AU040320      | 16417 | 126447431 | 126447631 |
| 4 | 126431014 | 126531581 + | NM_133886    | AU040320      | 944   | 126431958 | 126432158 |
| 4 | 126754627 | 126801619 + | NM_001285885 | Zmym6         | 8558  | 126763185 | 126763385 |
| 4 | 126754627 | 126801619 + | NM_001285887 | Zmym6         | 8558  | 126763185 | 126763385 |
| 4 | 126754627 | 126801619 + | NM_001285888 | Zmym6         | 8558  | 126763185 | 126763385 |
| 4 | 126754627 | 126801619 + | NM_177462    | Zmym6         | 8558  | 126763185 | 126763385 |
| 4 | 126754627 | 126801619 + | NR_104366    | Zmym6         | 8558  | 126763185 | 126763385 |
| 4 | 127002479 | 127008081 - | NM_001160012 | Gjb3          | 3182  | 127004699 | 127004899 |
| 4 | 127002479 | 127008081 - | NM_001160012 | Gjb3          | 927   | 127006954 | 127007154 |

|   |           |             |              |         |       |           |           |
|---|-----------|-------------|--------------|---------|-------|-----------|-----------|
| 4 | 127002479 | 127006370 - | NM_008126    | Gjb3    | 1471  | 127004699 | 127004899 |
| 4 | 127002479 | 127006370 - | NM_008126    | Gjb3    | -584  | 127006954 | 127007154 |
| 4 | 128260783 | 128287343 - | NM_177758    | Zscan20 | 11958 | 128275185 | 128275385 |
| 4 | 128331946 | 128430126 + | NM_001195130 | Phc2    | 13015 | 128344961 | 128345161 |
| 4 | 128607477 | 128639700 - | NM_001301841 | Azin2   | -6725 | 128646425 | 128646625 |
| 4 | 128609261 | 128639700 - | NM_172875    | Azin2   | -6725 | 128646425 | 128646625 |
| 4 | 128670468 | 128685968 + | NM_001033966 | Ak2     | 7631  | 128678099 | 128678299 |
| 4 | 128670468 | 128685968 + | NM_001033966 | Ak2     | 2100  | 128672568 | 128672768 |
| 4 | 128670468 | 128685968 + | NM_001033966 | Ak2     | 3645  | 128674113 | 128674313 |
| 4 | 128670468 | 128688774 + | NM_016895    | Ak2     | 7631  | 128678099 | 128678299 |
| 4 | 128670468 | 128688774 + | NM_016895    | Ak2     | 2100  | 128672568 | 128672768 |
| 4 | 128670468 | 128688774 + | NM_016895    | Ak2     | 3645  | 128674113 | 128674313 |
| 4 | 128735515 | 128761771 + | NM_029219    | Rnf19b  | -8295 | 128727020 | 128727220 |
| 4 | 128782774 | 128788871 + | NM_025452    | Tmem54  | -3350 | 128779224 | 128779424 |
| 4 | 128782774 | 128788871 + | NM_133881    | Tmem54  | -3350 | 128779224 | 128779424 |
| 4 | 128782792 | 128788869 + | NM_001290706 | Tmem54  | -3368 | 128779224 | 128779424 |
| 4 | 128828069 | 128866727 - | NM_029036    | S100pbb | 30604 | 128835923 | 128836123 |
| 4 | 128896822 | 128925688 - | NM_001033189 | C77080  | 3063  | 128922425 | 128922625 |
| 4 | 128896822 | 128925688 - | NM_001033189 | C77080  | 16829 | 128908659 | 128908859 |
| 4 | 128896822 | 128925688 - | NM_001033189 | C77080  | 13593 | 128911895 | 128912095 |
| 4 | 128896822 | 128916463 - | NM_001285865 | C77080  | -5962 | 128922425 | 128922625 |
| 4 | 128896822 | 128916463 - | NM_001285865 | C77080  | 7604  | 128908659 | 128908859 |
| 4 | 128896822 | 128916463 - | NM_001285865 | C77080  | 4368  | 128911895 | 128912095 |
| 4 | 128896822 | 128905156 - | NM_001285866 | C77080  | -3503 | 128908659 | 128908859 |
| 4 | 128896822 | 128905156 - | NM_001285866 | C77080  | -6739 | 128911895 | 128912095 |
| 4 | 128896822 | 128938649 - | NM_001285867 | C77080  | 16024 | 128922425 | 128922625 |
| 4 | 128896822 | 128938649 - | NM_001285867 | C77080  | -2171 | 128940820 | 128941020 |
| 4 | 128896822 | 128938649 - | NM_001285867 | C77080  | 29790 | 128908659 | 128908859 |
| 4 | 128896822 | 128938649 - | NM_001285867 | C77080  | 26554 | 128911895 | 128912095 |
| 4 | 128964865 | 128985804 + | NM_023485    | Sync    | 2386  | 128967251 | 128967451 |

|   |           |             |              |         |       |           |           |
|---|-----------|-------------|--------------|---------|-------|-----------|-----------|
| 4 | 128984344 | 129012615 - | NM_009030    | Rbbp4   | -661  | 129013276 | 129013476 |
| 4 | 129013270 | 129024274 + | NM_025970    | Zbtb8os | 6     | 129013276 | 129013476 |
| 4 | 129030876 | 129055273 - | NM_028603    | Zbtb8a  | -1874 | 129057147 | 129057347 |
| 4 | 129225588 | 129250886 - | NM_001162433 | Lck     | -1361 | 129252247 | 129252447 |
| 4 | 129353599 | 129374083 - | NM_199305    | Tmem39b | -4824 | 129378907 | 129379107 |
| 4 | 129380413 | 129419548 - | NR_045036    | Khdrbs1 | 1900  | 129417448 | 129417648 |
| 4 | 129391061 | 129419548 - | NM_011317    | Khdrbs1 | 1900  | 129417448 | 129417648 |
| 4 | 129497723 | 129527248 + | NM_008974    | Ptp4a2  | -9247 | 129488276 | 129488476 |
| 4 | 129497952 | 129527248 + | NM_001164745 | Ptp4a2  | -9476 | 129488276 | 129488476 |
| 4 | 129784800 | 129805379 + | NM_026441    | Pef1    | 420   | 129785220 | 129785420 |
| 4 | 129807461 | 129815796 - | NM_001163027 | Hcrtr1  | 4760  | 129810836 | 129811036 |
| 4 | 129807461 | 129816407 - | NM_001305392 | Hcrtr1  | 5371  | 129810836 | 129811036 |
| 4 | 129807461 | 129816407 - | NM_198959    | Hcrtr1  | 5371  | 129810836 | 129811036 |
| 4 | 129842844 | 129852047 - | NM_001168333 | Tinagl1 | 1081  | 129850766 | 129850966 |
| 4 | 129842844 | 129852367 - | NM_023476    | Tinagl1 | 1401  | 129850766 | 129850966 |
| 4 | 130037379 | 130067279 + | NM_025645    | Snrnp40 | 29849 | 130067228 | 130067428 |
| 4 | 130125705 | 130169624 + | NM_025998    | Nkain1  | 5159  | 130130864 | 130131064 |
| 4 | 130125705 | 130169624 + | NM_025998    | Nkain1  | 39689 | 130165394 | 130165594 |
| 4 | 130125705 | 130169624 + | NM_025998    | Nkain1  | -3159 | 130122346 | 130122546 |
| 4 | 130219274 | 130337480 + | NM_001159603 | Pum1    | 42950 | 130262224 | 130262424 |
| 4 | 130219274 | 130337480 + | NM_001159603 | Pum1    | 82571 | 130301845 | 130302045 |
| 4 | 130219274 | 130337480 + | NM_001159603 | Pum1    | 51900 | 130271174 | 130271374 |
| 4 | 130219274 | 130337480 + | NM_001159604 | Pum1    | 42950 | 130262224 | 130262424 |
| 4 | 130219274 | 130337480 + | NM_001159604 | Pum1    | 82571 | 130301845 | 130302045 |
| 4 | 130219274 | 130337480 + | NM_001159604 | Pum1    | 51900 | 130271174 | 130271374 |
| 4 | 130219274 | 130337480 + | NM_001159605 | Pum1    | 42950 | 130262224 | 130262424 |
| 4 | 130219274 | 130337480 + | NM_001159605 | Pum1    | 82571 | 130301845 | 130302045 |
| 4 | 130219274 | 130337480 + | NM_001159605 | Pum1    | 51900 | 130271174 | 130271374 |
| 4 | 130219274 | 130337480 + | NM_001159606 | Pum1    | 42950 | 130262224 | 130262424 |
| 4 | 130219274 | 130337480 + | NM_001159606 | Pum1    | 82571 | 130301845 | 130302045 |

|   |           |             |              |          |       |           |           |
|---|-----------|-------------|--------------|----------|-------|-----------|-----------|
| 4 | 130219274 | 130337480 + | NM_001159606 | Pum1     | 51900 | 130271174 | 130271374 |
| 4 | 130219274 | 130337480 + | NM_030722    | Pum1     | 42950 | 130262224 | 130262424 |
| 4 | 130219274 | 130337480 + | NM_030722    | Pum1     | 82571 | 130301845 | 130302045 |
| 4 | 130219274 | 130337480 + | NM_030722    | Pum1     | 51900 | 130271174 | 130271374 |
| 4 | 130305553 | 130305618 + | NR_028565    | Snord85  | -3508 | 130301845 | 130302045 |
| 4 | 131429554 | 131457641 + | NM_020587    | Srsf4    | 806   | 131430360 | 131430560 |
| 4 | 131479341 | 131631229 - | NM_001128607 | Epb4.1   | 15009 | 131616020 | 131616220 |
| 4 | 131479341 | 131631229 - | NM_001128607 | Epb4.1   | 10432 | 131620597 | 131620797 |
| 4 | 131479344 | 131628013 - | NM_183428    | Epb4.1   | 11793 | 131616020 | 131616220 |
| 4 | 131479344 | 131628013 - | NM_183428    | Epb4.1   | 7216  | 131620597 | 131620797 |
| 4 | 131666641 | 131700402 - | NM_013622    | Oprd1    | 11737 | 131688465 | 131688665 |
| 4 | 131740831 | 131768172 - | NM_145393    | Ythdf2   | 13748 | 131754224 | 131754424 |
| 4 | 131740831 | 131768172 - | NM_145393    | Ythdf2   | -2667 | 131770839 | 131771039 |
| 4 | 131740831 | 131768172 - | NM_145393    | Ythdf2   | 1622  | 131766350 | 131766550 |
| 4 | 131740831 | 131768172 - | NM_145393    | Ythdf2   | 17264 | 131750708 | 131750908 |
| 4 | 131858109 | 131859272 - | NM_001081651 | Rab42    | -2007 | 131861279 | 131861479 |
| 4 | 131858109 | 131859272 - | NM_001081651 | Rab42    | -5394 | 131864666 | 131864866 |
| 4 | 131864593 | 131866940 + | NR_029468    | Snhg12   | -3114 | 131861279 | 131861479 |
| 4 | 131864593 | 131866940 + | NR_029468    | Snhg12   | 73    | 131864666 | 131864866 |
| 4 | 131865380 | 131865516 + | NR_029412    | Snora16a | -3901 | 131861279 | 131861479 |
| 4 | 131865380 | 131865516 + | NR_029412    | Snora16a | -514  | 131864666 | 131864866 |
| 4 | 131865868 | 131865985 + | NR_034050    | Snora44  | -4389 | 131861279 | 131861479 |
| 4 | 131865868 | 131865985 + | NR_034050    | Snora44  | -1002 | 131864666 | 131864866 |
| 4 | 131866222 | 131866284 + | NR_034046    | Snora61  | -4743 | 131861279 | 131861479 |
| 4 | 131866222 | 131866284 + | NR_034046    | Snora61  | -1356 | 131864666 | 131864866 |
| 4 | 131866618 | 131866674 + | NR_028537    | Snord99  | -5139 | 131861279 | 131861479 |
| 4 | 131866618 | 131866674 + | NR_028537    | Snord99  | -1752 | 131864666 | 131864866 |
| 4 | 131911839 | 131978362 - | NM_001161797 | Phactr4  | -5549 | 131983911 | 131984111 |
| 4 | 131911839 | 131978362 - | NM_001161797 | Phactr4  | 41201 | 131936961 | 131937161 |
| 4 | 131911839 | 131978362 - | NM_001161797 | Phactr4  | 13169 | 131964993 | 131965193 |

|   |           |             |              |         |       |           |           |
|---|-----------|-------------|--------------|---------|-------|-----------|-----------|
| 4 | 131911839 | 131978362 - | NM_175306    | Phactr4 | -5549 | 131983911 | 131984111 |
| 4 | 131911839 | 131978362 - | NM_175306    | Phactr4 | 41201 | 131936961 | 131937161 |
| 4 | 131911839 | 131978362 - | NM_175306    | Phactr4 | 13169 | 131964993 | 131965193 |
| 4 | 132014644 | 132019837 - | NM_026039    | Med18   | -6468 | 132026305 | 132026505 |
| 4 | 132086470 | 132091330 - | NM_007512    | Atpif1  | 2678  | 132088452 | 132088652 |
| 4 | 132091474 | 132109658 + | NM_172400    | Dnajc8  | -2822 | 132088452 | 132088652 |
| 4 | 132119982 | 132136782 + | NM_001081211 | Ptafr   | 1094  | 132121076 | 132121276 |
| 4 | 132119982 | 132136782 + | NM_001081211 | Ptafr   | 2453  | 132122435 | 132122635 |
| 4 | 132119982 | 132136782 + | NM_001081211 | Ptafr   | 1926  | 132121908 | 132122108 |
| 4 | 132288881 | 132313087 - | NM_133888    | Smpdl3b | 8931  | 132303956 | 132304156 |
| 4 | 132382839 | 132399085 - | NM_001290725 | Ppp1r8  | -188  | 132399273 | 132399473 |
| 4 | 132382839 | 132399085 - | NM_146154    | Ppp1r8  | -188  | 132399273 | 132399473 |
| 4 | 132409979 | 132440374 - | NM_133887    | Stx12   | 9539  | 132430635 | 132430835 |
| 4 | 132409979 | 132440374 - | NM_133887    | Stx12   | 9982  | 132430192 | 132430392 |
| 4 | 132567421 | 132634026 + | NM_146155    | Ahdc1   | -3431 | 132563790 | 132563990 |
| 4 | 132567421 | 132634026 + | NM_146155    | Ahdc1   | 45225 | 132612646 | 132612846 |
| 4 | 132567421 | 132634026 + | NM_146155    | Ahdc1   | 16728 | 132584149 | 132584349 |
| 4 | 132686548 | 132754246 + | NM_153423    | Wasf2   | 1269  | 132687817 | 132688017 |
| 4 | 132686548 | 132754246 + | NM_153423    | Wasf2   | -8329 | 132678019 | 132678219 |
| 4 | 132686548 | 132754246 + | NM_153423    | Wasf2   | -3341 | 132683007 | 132683207 |
| 4 | 132796733 | 132808844 + | NM_016693    | Map3k6  | 6807  | 132803540 | 132803740 |
| 4 | 133036048 | 133043856 + | NM_175307    | Fam46b  | 3455  | 133039503 | 133039703 |
| 4 | 133234923 | 133309527 - | NM_001080819 | Arid1a  | -3119 | 133312646 | 133312846 |
| 4 | 133234923 | 133309527 - | NM_001080819 | Arid1a  | 21748 | 133287579 | 133287779 |
| 4 | 133403206 | 133443713 - | NM_001285505 | Rps6ka1 | 7831  | 133435682 | 133435882 |
| 4 | 133403206 | 133443713 - | NM_001285505 | Rps6ka1 | 8515  | 133434998 | 133435198 |
| 4 | 133403206 | 133430647 - | NM_001285506 | Rps6ka1 | -5035 | 133435682 | 133435882 |
| 4 | 133403206 | 133430647 - | NM_001285506 | Rps6ka1 | -4351 | 133434998 | 133435198 |
| 4 | 133403206 | 133443713 - | NM_009097    | Rps6ka1 | 7831  | 133435682 | 133435882 |
| 4 | 133403206 | 133443713 - | NM_009097    | Rps6ka1 | 8515  | 133434998 | 133435198 |

|   |           |             |              |               |       |           |           |
|---|-----------|-------------|--------------|---------------|-------|-----------|-----------|
| 4 | 133624367 | 133648420 + | NM_001162970 | Aim1l         | -9001 | 133615166 | 133615366 |
| 4 | 133624367 | 133648420 + | NM_001162970 | Aim1l         | -3280 | 133620887 | 133621087 |
| 4 | 133624367 | 133648420 + | NM_001162970 | Aim1l         | -6643 | 133617524 | 133617724 |
| 4 | 133624367 | 133648420 + | NM_001162970 | Aim1l         | -6259 | 133617908 | 133618108 |
| 4 | 133624367 | 133648420 + | NM_001162970 | Aim1l         | -7265 | 133616902 | 133617102 |
| 4 | 133683321 | 133684669 - | NM_080559    | Sh3bgrl3      | -2250 | 133686919 | 133687119 |
| 4 | 133685773 | 133743001 - | NM_144527    | Cep85         | 21681 | 133721120 | 133721320 |
| 4 | 133685773 | 133743001 - | NM_144527    | Cep85         | 55882 | 133686919 | 133687119 |
| 4 | 133783957 | 133794315 - | NM_001081047 | Cnksr1        | -324  | 133794639 | 133794839 |
| 4 | 133783957 | 133794315 - | NM_001081047 | Cnksr1        | 330   | 133793785 | 133793985 |
| 4 | 133799678 | 133801789 + | NR_040435    | E130218I03Rik | -4839 | 133794639 | 133794839 |
| 4 | 133799678 | 133801789 + | NR_040435    | E130218I03Rik | -5693 | 133793785 | 133793985 |
| 4 | 133799678 | 133801789 + | NR_040436    | E130218I03Rik | -4839 | 133794639 | 133794839 |
| 4 | 133799678 | 133801789 + | NR_040436    | E130218I03Rik | -5693 | 133793785 | 133793985 |
| 4 | 133898961 | 133910400 + | NM_001039677 | Slc30a2       | -505  | 133898256 | 133898456 |
| 4 | 133952235 | 133983328 + | NM_001285875 | Pafah2        | 4512  | 133956747 | 133956947 |
| 4 | 133952235 | 133983328 + | NM_133880    | Pafah2        | 4512  | 133956747 | 133956947 |
| 4 | 133953386 | 133983328 + | NM_001285872 | Pafah2        | 3361  | 133956747 | 133956947 |
| 4 | 133958827 | 133983328 + | NM_001285874 | Pafah2        | -1880 | 133956747 | 133956947 |
| 4 | 133958885 | 133983328 + | NM_001285877 | Pafah2        | -1938 | 133956747 | 133956947 |
| 4 | 134052676 | 134066153 + | NM_001285845 | Paqr7         | -1784 | 134050692 | 134050892 |
| 4 | 134052676 | 134066153 + | NM_001285845 | Paqr7         | 1650  | 134054326 | 134054526 |
| 4 | 134052676 | 134066153 + | NM_001285845 | Paqr7         | -6287 | 134046189 | 134046389 |
| 4 | 134052676 | 134066153 + | NM_001285846 | Paqr7         | -1784 | 134050692 | 134050892 |
| 4 | 134052676 | 134066153 + | NM_001285846 | Paqr7         | 1650  | 134054326 | 134054526 |
| 4 | 134052676 | 134066153 + | NM_001285846 | Paqr7         | -6287 | 134046189 | 134046389 |
| 4 | 134052676 | 134066153 + | NM_001285847 | Paqr7         | -1784 | 134050692 | 134050892 |
| 4 | 134052676 | 134066153 + | NM_001285847 | Paqr7         | 1650  | 134054326 | 134054526 |
| 4 | 134052676 | 134066153 + | NM_001285847 | Paqr7         | -6287 | 134046189 | 134046389 |
| 4 | 134052676 | 134066153 + | NM_027995    | Paqr7         | -1784 | 134050692 | 134050892 |

|   |           |             |              |         |       |           |           |
|---|-----------|-------------|--------------|---------|-------|-----------|-----------|
| 4 | 134052676 | 134066153 + | NM_027995    | Paqr7   | 1650  | 134054326 | 134054526 |
| 4 | 134052676 | 134066153 + | NM_027995    | Paqr7   | -6287 | 134046189 | 134046389 |
| 4 | 134052956 | 134066153 + | NM_001285849 | Paqr7   | -2064 | 134050692 | 134050892 |
| 4 | 134052956 | 134066153 + | NM_001285849 | Paqr7   | 1370  | 134054326 | 134054526 |
| 4 | 134052956 | 134066153 + | NM_001285849 | Paqr7   | -6567 | 134046189 | 134046389 |
| 4 | 134117605 | 134260206 - | NM_207237    | Man1c1  | 38605 | 134221401 | 134221601 |
| 4 | 134117605 | 134260206 - | NM_207237    | Man1c1  | -4931 | 134265137 | 134265337 |
| 4 | 134117605 | 134260206 - | NM_207237    | Man1c1  | 33080 | 134226926 | 134227126 |
| 4 | 134301327 | 134323920 - | NM_145554    | Ldlrap1 | -2643 | 134326563 | 134326763 |
| 4 | 134453764 | 134470832 - | NM_027935    | Tmem50a | -9476 | 134480308 | 134480508 |
| 4 | 134479540 | 134483286 + | NM_023665    | Rsrp1   | 768   | 134480308 | 134480508 |
| 4 | 134486895 | 134493453 + | NM_026780    | Syf2    | -6387 | 134480308 | 134480508 |
| 4 | 134769885 | 134828676 - | NM_013885    | Clic4   | -2936 | 134831612 | 134831812 |
| 4 | 134876399 | 134909130 - | NM_001130477 | Srrm1   | 17176 | 134891754 | 134891954 |
| 4 | 134876399 | 134909130 - | NM_016799    | Srrm1   | 17176 | 134891754 | 134891954 |
| 4 | 134925492 | 134941588 - | NM_001168498 | Ncmap   | 148   | 134941240 | 134941440 |
| 4 | 134925492 | 134954143 - | NM_001168500 | Ncmap   | 12703 | 134941240 | 134941440 |
| 4 | 134925492 | 134941588 - | NM_001243305 | Ncmap   | 148   | 134941240 | 134941440 |
| 4 | 134925492 | 134954143 - | NM_001243306 | Ncmap   | 12703 | 134941240 | 134941440 |
| 4 | 134925492 | 134954143 - | NM_145555    | Ncmap   | 12703 | 134941240 | 134941440 |
| 4 | 134925492 | 134941588 - | NM_181047    | Ncmap   | 148   | 134941240 | 134941440 |
| 4 | 134968224 | 134989721 - | NM_022980    | Rcan3   | -2596 | 134992317 | 134992517 |
| 4 | 135097803 | 135129536 - | NM_001013756 | Grhl3   | 7834  | 135121502 | 135121702 |
| 4 | 135097803 | 135129536 - | NM_001013756 | Grhl3   | -3894 | 135133430 | 135133630 |
| 4 | 135242372 | 135264096 + | NM_174851    | Ifnlr1  | 19764 | 135262136 | 135262336 |
| 4 | 135284074 | 135311299 + | NM_178257    | Il22ra1 | -232  | 135283642 | 135283842 |
| 4 | 135284074 | 135311299 + | NM_178257    | Il22ra1 | 24676 | 135308750 | 135308950 |
| 4 | 135315630 | 135371483 + | NM_001085509 | Myom3   | -3500 | 135311930 | 135312130 |
| 4 | 135315630 | 135371483 + | NM_001085509 | Myom3   | -6680 | 135308750 | 135308950 |
| 4 | 135411986 | 135421734 + | NM_001080387 | Srsf10  | 599   | 135412585 | 135412785 |

|   |           |             |              |        |       |           |           |
|---|-----------|-------------|--------------|--------|-------|-----------|-----------|
| 4 | 135411986 | 135421734 + | NM_001080387 | Srsf10 | -5574 | 135406212 | 135406412 |
| 4 | 135411986 | 135421734 + | NM_001284195 | Srsf10 | 599   | 135412585 | 135412785 |
| 4 | 135411986 | 135421734 + | NM_001284195 | Srsf10 | -5574 | 135406212 | 135406412 |
| 4 | 135411986 | 135425815 + | NM_001284196 | Srsf10 | 599   | 135412585 | 135412785 |
| 4 | 135411986 | 135425815 + | NM_001284196 | Srsf10 | -5574 | 135406212 | 135406412 |
| 4 | 135411986 | 135425815 + | NM_010178    | Srsf10 | 599   | 135412585 | 135412785 |
| 4 | 135411986 | 135425815 + | NM_010178    | Srsf10 | -5574 | 135406212 | 135406412 |
| 4 | 135451104 | 135476135 + | NM_009924    | Cnr2   | 11603 | 135462707 | 135462907 |
| 4 | 135451104 | 135476135 + | NM_009924    | Cnr2   | 24136 | 135475240 | 135475440 |
| 4 | 135451104 | 135476135 + | NM_009924    | Cnr2   | 3205  | 135454309 | 135454509 |
| 4 | 135467595 | 135476135 + | NM_001305278 | Cnr2   | -4688 | 135462707 | 135462907 |
| 4 | 135467595 | 135476135 + | NM_001305278 | Cnr2   | 7645  | 135475240 | 135475440 |
| 4 | 135476641 | 135496216 + | NM_024243    | Fuca1  | -1201 | 135475240 | 135475440 |
| 4 | 135699737 | 135701308 + | NM_008321    | Id3    | 684   | 135700421 | 135700621 |
| 4 | 135728189 | 135751972 + | NM_177733    | E2f2   | 14859 | 135743048 | 135743248 |
| 4 | 135728189 | 135751972 + | NM_177733    | E2f2   | 5702  | 135733891 | 135734091 |
| 4 | 135736697 | 135751972 + | NM_001305399 | E2f2   | 6351  | 135743048 | 135743248 |
| 4 | 135736697 | 135751972 + | NM_001305399 | E2f2   | -2606 | 135733891 | 135734091 |
| 4 | 135866857 | 135901895 + | NM_001277121 | Hnrnpr | -431  | 135866226 | 135866426 |
| 4 | 135866857 | 135901895 + | NM_001277122 | Hnrnpr | -431  | 135866226 | 135866426 |
| 4 | 135866857 | 135901895 + | NM_001277123 | Hnrnpr | -431  | 135866226 | 135866426 |
| 4 | 135866857 | 135901895 + | NM_028871    | Hnrnpr | -431  | 135866226 | 135866426 |
| 4 | 136025676 | 136105234 + | NM_024452    | Luzp1  | 72903 | 136098579 | 136098779 |
| 4 | 136025676 | 136105234 + | NM_024452    | Luzp1  | 22030 | 136047706 | 136047906 |
| 4 | 136106448 | 136158639 - | NM_133872    | Kdm1a  | 10402 | 136148037 | 136148237 |
| 4 | 136106448 | 136158639 - | NM_133872    | Kdm1a  | 40691 | 136117748 | 136117948 |
| 4 | 136209525 | 136391927 - | NM_001290753 | Ephb2  | 41485 | 136350242 | 136350442 |
| 4 | 136209525 | 136391927 - | NM_001290753 | Ephb2  | -1905 | 136393832 | 136394032 |
| 4 | 136209529 | 136391927 - | NM_010142    | Ephb2  | 41485 | 136350242 | 136350442 |
| 4 | 136209529 | 136391927 - | NM_010142    | Ephb2  | -1905 | 136393832 | 136394032 |



|   |           |             |              |               |        |           |           |
|---|-----------|-------------|--------------|---------------|--------|-----------|-----------|
| 4 | 136485334 | 136512732 - | NM_007939    | Epha8         | -4978  | 136517710 | 136517910 |
| 4 | 136875611 | 136913675 - | NM_009861    | Cdc42         | 4936   | 136908539 | 136908739 |
| 4 | 136877678 | 136913675 - | NM_001243769 | Cdc42         | 4936   | 136908539 | 136908739 |
| 4 | 136976923 | 136986436 - | NM_026419    | Cela3b        | -83    | 136986519 | 136986719 |
| 4 | 137009211 | 137011377 + | NM_027063    | 1700013G24Rik | -6883  | 137002128 | 137002328 |
| 4 | 137024718 | 137126546 + | NM_008305    | Hspg2         | 15149  | 137039867 | 137040067 |
| 4 | 137024718 | 137126546 + | NM_008305    | Hspg2         | 74251  | 137098969 | 137099169 |
| 4 | 137150104 | 137214453 + | NM_130879    | Usp48         | 403    | 137150507 | 137150707 |
| 4 | 137220641 | 137285777 + | NM_029563    | Rap1gap       | 48250  | 137268891 | 137269091 |
| 4 | 137220641 | 137285777 + | NM_029563    | Rap1gap       | 43531  | 137264172 | 137264372 |
| 4 | 137237582 | 137285777 + | NM_001081155 | Rap1gap       | 31309  | 137268891 | 137269091 |
| 4 | 137237582 | 137285777 + | NM_001081155 | Rap1gap       | 26590  | 137264172 | 137264372 |
| 4 | 137237582 | 137285777 + | NM_001256218 | Rap1gap       | 31309  | 137268891 | 137269091 |
| 4 | 137237582 | 137285777 + | NM_001256218 | Rap1gap       | 26590  | 137264172 | 137264372 |
| 4 | 137297646 | 137352300 - | NM_007431    | Alpl          | 9844   | 137342256 | 137342456 |
| 4 | 137418152 | 137521145 + | NM_199307    | Ece1          | -6997  | 137410955 | 137411155 |
| 4 | 137549371 | 137762995 + | NM_001256195 | Eif4g3        | 191227 | 137740598 | 137740798 |
| 4 | 137549371 | 137762995 + | NM_001256198 | Eif4g3        | 191227 | 137740598 | 137740798 |
| 4 | 137549371 | 137762995 + | NM_172703    | Eif4g3        | 191227 | 137740598 | 137740798 |
| 4 | 137818166 | 137857889 + | NM_001190978 | Kif17         | 20710  | 137838876 | 137839076 |
| 4 | 137818166 | 137857889 + | NM_010623    | Kif17         | 20710  | 137838876 | 137839076 |
| 4 | 137860653 | 137868527 + | NM_007838    | Ddost         | -799   | 137859654 | 137859854 |
| 4 | 137869325 | 137882212 - | NM_026880    | Pink1         | -134   | 137882346 | 137882546 |
| 4 | 137869325 | 137882212 - | NM_026880    | Pink1         | 788    | 137881224 | 137881424 |
| 4 | 137872047 | 137872116 - | NR_105986    | Mir7019       | -9108  | 137881224 | 137881424 |
| 4 | 138331650 | 138338059 + | NM_011109    | Pla2g2d       | -2915  | 138328535 | 138328735 |
| 4 | 138355162 | 138419385 - | NM_001122954 | Pla2g5        | 35683  | 138383502 | 138383702 |
| 4 | 138355162 | 138419385 - | NM_001122954 | Pla2g5        | 37516  | 138381669 | 138381869 |
| 4 | 138355162 | 138375173 - | NM_011110    | Pla2g5        | -8329  | 138383502 | 138383702 |
| 4 | 138355162 | 138375173 - | NM_011110    | Pla2g5        | -6496  | 138381669 | 138381869 |

|   |           |             |              |         |       |           |           |
|---|-----------|-------------|--------------|---------|-------|-----------|-----------|
| 4 | 138387772 | 138391105 + | NR_002926    | Pla2g2a | -4070 | 138383502 | 138383702 |
| 4 | 138387772 | 138391105 + | NR_002926    | Pla2g2a | -5903 | 138381669 | 138381869 |
| 4 | 138387791 | 138391105 + | NM_001082531 | Pla2g2a | -4089 | 138383502 | 138383702 |
| 4 | 138387791 | 138391105 + | NM_001082531 | Pla2g2a | -5922 | 138381669 | 138381869 |
| 4 | 138523027 | 138524282 + | NM_025786    | Rnf186  | 1655  | 138524682 | 138524882 |
| 4 | 138523027 | 138524282 + | NM_025786    | Rnf186  | 637   | 138523664 | 138523864 |
| 4 | 138528198 | 138615087 + | NM_001305423 | Tmco4   | 31812 | 138560010 | 138560210 |
| 4 | 138528198 | 138615087 + | NM_001305423 | Tmco4   | 48259 | 138576457 | 138576657 |
| 4 | 138528198 | 138615087 + | NM_001305423 | Tmco4   | 46112 | 138574310 | 138574510 |
| 4 | 138528198 | 138615087 + | NM_001305423 | Tmco4   | 47192 | 138575390 | 138575590 |
| 4 | 138528198 | 138615087 + | NM_001305423 | Tmco4   | 35683 | 138563881 | 138564081 |
| 4 | 138528198 | 138615087 + | NM_001305423 | Tmco4   | -3316 | 138524682 | 138524882 |
| 4 | 138528198 | 138615087 + | NM_001305423 | Tmco4   | 22423 | 138550621 | 138550821 |
| 4 | 138528198 | 138615087 + | NM_001305423 | Tmco4   | -4334 | 138523664 | 138523864 |
| 4 | 138528820 | 138615087 + | NM_029857    | Tmco4   | 31190 | 138560010 | 138560210 |
| 4 | 138528820 | 138615087 + | NM_029857    | Tmco4   | 47637 | 138576457 | 138576657 |
| 4 | 138528820 | 138615087 + | NM_029857    | Tmco4   | 45490 | 138574310 | 138574510 |
| 4 | 138528820 | 138615087 + | NM_029857    | Tmco4   | 46570 | 138575390 | 138575590 |
| 4 | 138528820 | 138615087 + | NM_029857    | Tmco4   | 35061 | 138563881 | 138564081 |
| 4 | 138528820 | 138615087 + | NM_029857    | Tmco4   | -3938 | 138524682 | 138524882 |
| 4 | 138528820 | 138615087 + | NM_029857    | Tmco4   | 21801 | 138550621 | 138550821 |
| 4 | 138528820 | 138615087 + | NM_029857    | Tmco4   | -4956 | 138523664 | 138523864 |
| 4 | 138638207 | 138648886 - | NM_008675    | Nbl1    | -1187 | 138650073 | 138650273 |
| 4 | 138731322 | 138736571 - | NR_033543    | Gm16287 | 554   | 138735817 | 138736017 |
| 4 | 138748814 | 138847736 + | NM_001037761 | Capzb   | 58086 | 138806900 | 138807100 |
| 4 | 138748814 | 138847736 + | NM_001037761 | Capzb   | 59270 | 138808084 | 138808284 |
| 4 | 138748814 | 138847736 + | NM_009798    | Capzb   | 58086 | 138806900 | 138807100 |
| 4 | 138748814 | 138847736 + | NM_009798    | Capzb   | 59270 | 138808084 | 138808284 |
| 4 | 138750026 | 138847736 + | NM_001271405 | Capzb   | 56874 | 138806900 | 138807100 |
| 4 | 138750026 | 138847736 + | NM_001271405 | Capzb   | 58058 | 138808084 | 138808284 |

|   |           |             |              |           |        |           |           |
|---|-----------|-------------|--------------|-----------|--------|-----------|-----------|
| 4 | 138789298 | 138847736 + | NM_001271406 | Capzb     | 17602  | 138806900 | 138807100 |
| 4 | 138789298 | 138847736 + | NM_001271406 | Capzb     | 18786  | 138808084 | 138808284 |
| 4 | 138936574 | 139045448 + | NM_001160319 | Ubr4      | 100807 | 139037381 | 139037581 |
| 4 | 139178809 | 139205607 + | NM_175438    | Aldh4a1   | 5272   | 139184081 | 139184281 |
| 4 | 139178809 | 139205607 + | NM_175438    | Aldh4a1   | 7218   | 139186027 | 139186227 |
| 4 | 139178809 | 139205607 + | NM_175438    | Aldh4a1   | 12048  | 139190857 | 139191057 |
| 4 | 139178809 | 139205607 + | NM_175438    | Aldh4a1   | 6280   | 139185089 | 139185289 |
| 4 | 139178809 | 139205607 + | NM_175438    | Aldh4a1   | -370   | 139178239 | 139178439 |
| 4 | 139199957 | 139200027 + | NR_105987    | Mir7020   | -8900  | 139190857 | 139191057 |
| 4 | 139209453 | 139226195 + | NM_031873    | Tas1r2    | -2964  | 139206289 | 139206489 |
| 4 | 139293996 | 139388884 - | NM_011039    | Pax7      | 63623  | 139325061 | 139325261 |
| 4 | 140070400 | 140221821 - | NM_001112722 | Arhgef10l | 16346  | 140205275 | 140205475 |
| 4 | 140070400 | 140221821 - | NM_001112722 | Arhgef10l | 61001  | 140160620 | 140160820 |
| 4 | 140070400 | 140221821 - | NM_001112722 | Arhgef10l | 44717  | 140176904 | 140177104 |
| 4 | 140070400 | 140204672 - | NM_001112723 | Arhgef10l | -603   | 140205275 | 140205475 |
| 4 | 140070400 | 140204672 - | NM_001112723 | Arhgef10l | 43852  | 140160620 | 140160820 |
| 4 | 140070400 | 140204672 - | NM_001112723 | Arhgef10l | 27568  | 140176904 | 140177104 |
| 4 | 140070400 | 140221803 - | NM_001290803 | Arhgef10l | 16328  | 140205275 | 140205475 |
| 4 | 140070400 | 140221803 - | NM_001290803 | Arhgef10l | 60983  | 140160620 | 140160820 |
| 4 | 140070400 | 140221803 - | NM_001290803 | Arhgef10l | 44699  | 140176904 | 140177104 |
| 4 | 140070400 | 140204672 - | NM_172415    | Arhgef10l | -603   | 140205275 | 140205475 |
| 4 | 140070400 | 140204672 - | NM_172415    | Arhgef10l | 43852  | 140160620 | 140160820 |
| 4 | 140070400 | 140204672 - | NM_172415    | Arhgef10l | 27568  | 140176904 | 140177104 |
| 4 | 140257388 | 140279136 + | NM_173867    | Rcc2      | 7113   | 140264501 | 140264701 |
| 4 | 140503581 | 140513818 - | NR_045911    | Gm13031   | 4996   | 140508622 | 140508822 |
| 4 | 140503581 | 140513818 - | NR_045911    | Gm13031   | 0      | 140513723 | 140513923 |
| 4 | 140517186 | 140535108 + | NM_023374    | Sdhb      | 16111  | 140533297 | 140533497 |
| 4 | 140517186 | 140535108 + | NM_023374    | Sdhb      | -8364  | 140508622 | 140508822 |
| 4 | 140517186 | 140535108 + | NM_023374    | Sdhb      | -3263  | 140513723 | 140513923 |
| 4 | 140542788 | 140563617 + | NM_001164366 | Atp13a2   | -9291  | 140533297 | 140533497 |

|   |           |             |              |         |        |           |           |
|---|-----------|-------------|--------------|---------|--------|-----------|-----------|
| 4 | 140542788 | 140563617 + | NM_029097    | Atp13a2 | -9291  | 140533297 | 140533497 |
| 4 | 140668893 | 140695712 - | NM_001025608 | Szrd1   | -7807  | 140703519 | 140703719 |
| 4 | 140668893 | 140695712 - | NM_001277195 | Szrd1   | -7807  | 140703519 | 140703719 |
| 4 | 140668893 | 140695712 - | NR_102343    | Szrd1   | -7807  | 140703519 | 140703719 |
| 4 | 140668893 | 140695712 - | NR_102344    | Szrd1   | -7807  | 140703519 | 140703719 |
| 4 | 140703837 | 140759978 + | NM_172518    | Fbxo42  | 11276  | 140715113 | 140715313 |
| 4 | 140703837 | 140759978 + | NM_172518    | Fbxo42  | 49461  | 140753298 | 140753498 |
| 4 | 140703837 | 140759978 + | NM_172518    | Fbxo42  | -118   | 140703519 | 140703719 |
| 4 | 140857136 | 140885300 + | NM_010139    | Epha2   | 13982  | 140871118 | 140871318 |
| 4 | 140857136 | 140885300 + | NM_010139    | Epha2   | 25391  | 140882527 | 140882727 |
| 4 | 140857136 | 140885300 + | NM_010139    | Epha2   | 11257  | 140868393 | 140868593 |
| 4 | 140960272 | 140971904 - | NM_019701    | Clcnkb  | -5032  | 140976936 | 140977136 |
| 4 | 140976694 | 140981226 + | NM_013868    | Hspb7   | 242    | 140976936 | 140977136 |
| 4 | 140988587 | 140992021 - | NM_001033374 | Gm694   | -3258  | 140995279 | 140995479 |
| 4 | 141000588 | 141023853 + | NM_009541    | Zbtb17  | -5109  | 140995279 | 140995479 |
| 4 | 141000588 | 141023853 + | NM_009541    | Zbtb17  | 11723  | 141012311 | 141012511 |
| 4 | 141131977 | 141155840 - | NM_001163256 | Fblim1  | 20814  | 141134826 | 141135026 |
| 4 | 141131977 | 141161968 - | NM_133754    | Fblim1  | 26942  | 141134826 | 141135026 |
| 4 | 141239478 | 141279335 - | NM_001017966 | Ddi2    | -8484  | 141287819 | 141288019 |
| 4 | 141239478 | 141279335 - | NM_001017966 | Ddi2    | -1927  | 141281262 | 141281462 |
| 4 | 141302590 | 141315179 + | NM_001081408 | Agmat   | -6527  | 141295863 | 141296063 |
| 4 | 141317913 | 141346560 - | NM_172338    | Dnajc16 | -2344  | 141348904 | 141349104 |
| 4 | 141349527 | 141371894 + | NM_001277932 | Casp9   | -423   | 141348904 | 141349104 |
| 4 | 141349527 | 141371894 + | NM_015733    | Casp9   | -423   | 141348904 | 141349104 |
| 4 | 141414057 | 141430836 - | NM_025994    | Efhd2   | 2015   | 141428621 | 141428821 |
| 4 | 141446538 | 141567567 - | NM_177868    | Fhad1   | 118189 | 141449178 | 141449378 |
| 4 | 141586908 | 141640220 - | NM_145402    | Tmem51  | 35582  | 141604438 | 141604638 |
| 4 | 141695155 | 141795317 - | NM_001109685 | Kazn    | 2584   | 141792533 | 141792733 |
| 4 | 144367107 | 144376487 - | NM_001126316 | Gm438   | 4374   | 144371913 | 144372113 |
| 4 | 144367107 | 144376487 - | NM_001126316 | Gm438   | 5933   | 144370354 | 144370554 |

|   |           |             |              |         |        |           |           |
|---|-----------|-------------|--------------|---------|--------|-----------|-----------|
| 4 | 144482730 | 144517549 + | NM_001172424 | Dhrs3   | 8890   | 144491620 | 144491820 |
| 4 | 144482730 | 144517549 + | NM_001172424 | Dhrs3   | 20268  | 144502998 | 144503198 |
| 4 | 144482730 | 144517549 + | NM_001172424 | Dhrs3   | -886   | 144481644 | 144481844 |
| 4 | 144482730 | 144517549 + | NM_001172424 | Dhrs3   | 2009   | 144484739 | 144484939 |
| 4 | 144483040 | 144517549 + | NM_011303    | Dhrs3   | 8580   | 144491620 | 144491820 |
| 4 | 144483040 | 144517549 + | NM_011303    | Dhrs3   | 19958  | 144502998 | 144503198 |
| 4 | 144483040 | 144517549 + | NM_011303    | Dhrs3   | -1196  | 144481644 | 144481844 |
| 4 | 144483040 | 144517549 + | NM_011303    | Dhrs3   | 1699   | 144484739 | 144484939 |
| 4 | 144562525 | 144784909 - | NM_001276465 | Vps13d  | 115270 | 144669439 | 144669639 |
| 4 | 144562525 | 144784909 - | NM_001276465 | Vps13d  | 11466  | 144773243 | 144773443 |
| 4 | 144562525 | 144784909 - | NM_001276465 | Vps13d  | 15810  | 144768899 | 144769099 |
| 4 | 144562525 | 144784909 - | NM_001276465 | Vps13d  | 196325 | 144588384 | 144588584 |
| 4 | 144562525 | 144784909 - | NM_001276465 | Vps13d  | 180579 | 144604130 | 144604330 |
| 4 | 144562525 | 144784909 - | NM_001276465 | Vps13d  | 144283 | 144640426 | 144640626 |
| 4 | 144562525 | 144784909 - | NM_001276465 | Vps13d  | 184752 | 144599957 | 144600157 |
| 4 | 144562525 | 144784909 - | NM_001276465 | Vps13d  | 197094 | 144587615 | 144587815 |
| 4 | 144562525 | 144780570 - | NM_001276502 | Vps13d  | 110931 | 144669439 | 144669639 |
| 4 | 144562525 | 144780570 - | NM_001276502 | Vps13d  | 7127   | 144773243 | 144773443 |
| 4 | 144562525 | 144780570 - | NM_001276502 | Vps13d  | 11471  | 144768899 | 144769099 |
| 4 | 144562525 | 144780570 - | NM_001276502 | Vps13d  | 191986 | 144588384 | 144588584 |
| 4 | 144562525 | 144780570 - | NM_001276502 | Vps13d  | 176240 | 144604130 | 144604330 |
| 4 | 144562525 | 144780570 - | NM_001276502 | Vps13d  | 139944 | 144640426 | 144640626 |
| 4 | 144562525 | 144780570 - | NM_001276502 | Vps13d  | 180413 | 144599957 | 144600157 |
| 4 | 144562525 | 144780570 - | NM_001276502 | Vps13d  | 192755 | 144587615 | 144587815 |
| 4 | 146549975 | 146887530 + | NM_001039209 | Gm13152 | 256587 | 146806562 | 146806762 |
| 4 | 147247695 | 147279019 - | NM_001285920 | Mfn2    | 1728   | 147277091 | 147277291 |
| 4 | 147247695 | 147279019 - | NM_001285921 | Mfn2    | 1728   | 147277091 | 147277291 |
| 4 | 147247695 | 147279019 - | NM_001285922 | Mfn2    | 1728   | 147277091 | 147277291 |
| 4 | 147247695 | 147278808 - | NM_001285923 | Mfn2    | 1517   | 147277091 | 147277291 |
| 4 | 147247695 | 147279019 - | NM_133201    | Mfn2    | 1728   | 147277091 | 147277291 |

|   |           |             |              |          |        |           |           |
|---|-----------|-------------|--------------|----------|--------|-----------|-----------|
| 4 | 147822691 | 147931795 + | NM_020009    | Mtor     | 23872  | 147846563 | 147846763 |
| 4 | 148178501 | 148329002 + | NM_001159344 | Casz1    | 61375  | 148239876 | 148240076 |
| 4 | 148178501 | 148329002 + | NM_001159344 | Casz1    | 141230 | 148319731 | 148319931 |
| 4 | 148178501 | 148329002 + | NM_001159344 | Casz1    | 146164 | 148324665 | 148324865 |
| 4 | 148178501 | 148329002 + | NM_001159344 | Casz1    | 102532 | 148281033 | 148281233 |
| 4 | 148178501 | 148329002 + | NM_001159344 | Casz1    | -6377  | 148171924 | 148172124 |
| 4 | 148178501 | 148329002 + | NM_001159344 | Casz1    | 33749  | 148212250 | 148212450 |
| 4 | 148178501 | 148319240 + | NM_027195    | Casz1    | 61375  | 148239876 | 148240076 |
| 4 | 148178501 | 148319240 + | NM_027195    | Casz1    | 102532 | 148281033 | 148281233 |
| 4 | 148178501 | 148319240 + | NM_027195    | Casz1    | -6377  | 148171924 | 148172124 |
| 4 | 148178501 | 148319240 + | NM_027195    | Casz1    | 33749  | 148212250 | 148212450 |
| 4 | 148334644 | 148473922 - | NM_019781    | Pex14    | 112354 | 148361368 | 148361568 |
| 4 | 148334644 | 148473922 - | NM_019781    | Pex14    | 32427  | 148441295 | 148441495 |
| 4 | 148524094 | 148540817 - | NM_001081274 | Pgd      | -3630  | 148544447 | 148544647 |
| 4 | 148550428 | 148681843 - | NM_001290995 | Kif1b    | 21012  | 148660631 | 148660831 |
| 4 | 148550428 | 148681843 - | NM_001290995 | Kif1b    | 22330  | 148659313 | 148659513 |
| 4 | 148550430 | 148681808 - | NM_207682    | Kif1b    | 20977  | 148660631 | 148660831 |
| 4 | 148550430 | 148681808 - | NM_207682    | Kif1b    | 22295  | 148659313 | 148659513 |
| 4 | 148607843 | 148681808 - | NM_008441    | Kif1b    | 20977  | 148660631 | 148660831 |
| 4 | 148607843 | 148681808 - | NM_008441    | Kif1b    | 22295  | 148659313 | 148659513 |
| 4 | 148702525 | 148800741 - | NM_022022    | Ube4b    | 27008  | 148773533 | 148773733 |
| 4 | 148702525 | 148800741 - | NM_022022    | Ube4b    | 25098  | 148775443 | 148775643 |
| 4 | 148702525 | 148800741 - | NM_022022    | Ube4b    | 31885  | 148768656 | 148768856 |
| 4 | 148702525 | 148800741 - | NM_022022    | Ube4b    | 28026  | 148772515 | 148772715 |
| 4 | 148702525 | 148800741 - | NM_022022    | Ube4b    | 33858  | 148766683 | 148766883 |
| 4 | 148842896 | 148859252 - | NM_133435    | Nmnat1   | -4579  | 148863831 | 148864031 |
| 4 | 148859442 | 148870777 + | NM_026963    | Lzic     | 4389   | 148863831 | 148864031 |
| 4 | 148892350 | 148940547 + | NM_023465    | Ctnnbip1 | 24956  | 148917306 | 148917506 |
| 4 | 148892350 | 148940547 + | NM_023465    | Ctnnbip1 | -9780  | 148882370 | 148882570 |
| 4 | 148919226 | 148940547 + | NM_001141930 | Ctnnbip1 | -1720  | 148917306 | 148917506 |

|   |           |             |              |               |        |           |           |
|---|-----------|-------------|--------------|---------------|--------|-----------|-----------|
| 4 | 149023277 | 149075739 - | NM_001029837 | Pik3cd        | -3818  | 149079557 | 149079757 |
| 4 | 149023277 | 149072818 - | NM_001164049 | Pik3cd        | -6739  | 149079557 | 149079757 |
| 4 | 149023277 | 149072818 - | NM_001164050 | Pik3cd        | -6739  | 149079557 | 149079757 |
| 4 | 149023277 | 149072818 - | NM_008840    | Pik3cd        | -6739  | 149079557 | 149079757 |
| 4 | 149353583 | 149377346 - | NM_001291004 | H6pd          | 15878  | 149361268 | 149361468 |
| 4 | 149353583 | 149377346 - | NM_001291004 | H6pd          | 13784  | 149363362 | 149363562 |
| 4 | 149353583 | 149383133 - | NM_173371    | H6pd          | 21665  | 149361268 | 149361468 |
| 4 | 149353583 | 149383133 - | NM_173371    | H6pd          | 19571  | 149363362 | 149363562 |
| 4 | 149461612 | 149480037 + | NM_177366    | Gpr157        | 6252   | 149467864 | 149468064 |
| 4 | 149493453 | 149518278 + | NM_019741    | Slc2a5        | 12420  | 149505873 | 149506073 |
| 4 | 149493453 | 149518278 + | NM_019741    | Slc2a5        | 13378  | 149506831 | 149507031 |
| 4 | 149493453 | 149518278 + | NM_019741    | Slc2a5        | -4028  | 149489225 | 149489425 |
| 4 | 149523081 | 149542592 + | NM_001085529 | Slc2a7        | 3639   | 149526720 | 149526920 |
| 4 | 149523081 | 149542592 + | NM_001085529 | Slc2a7        | 6918   | 149529999 | 149530199 |
| 4 | 149523081 | 149542592 + | NM_001085529 | Slc2a7        | -1716  | 149521165 | 149521365 |
| 4 | 149523081 | 149542592 + | NM_001085529 | Slc2a7        | -59    | 149522822 | 149523022 |
| 4 | 149611306 | 149622983 + | NM_023119    | Eno1          | 2955   | 149614261 | 149614461 |
| 4 | 149611306 | 149622983 + | NM_023119    | Eno1          | 9077   | 149620383 | 149620583 |
| 4 | 149611306 | 149622983 + | NM_023119    | Eno1          | 930    | 149612236 | 149612436 |
| 4 | 149611433 | 149622983 + | NM_001025388 | Eno1b         | 2828   | 149614261 | 149614461 |
| 4 | 149611433 | 149622983 + | NM_001025388 | Eno1b         | 8950   | 149620383 | 149620583 |
| 4 | 149611433 | 149622983 + | NM_001025388 | Eno1b         | 803    | 149612236 | 149612436 |
| 4 | 149656025 | 149996076 + | NM_001085492 | Rere          | 115077 | 149771102 | 149771302 |
| 4 | 149656025 | 149996076 + | NM_001085492 | Rere          | 290063 | 149946088 | 149946288 |
| 4 | 149656025 | 149996076 + | NM_001085492 | Rere          | 293975 | 149950000 | 149950200 |
| 4 | 149656025 | 149996076 + | NM_001085492 | Rere          | 235538 | 149891563 | 149891763 |
| 4 | 149656025 | 149996076 + | NM_001085492 | Rere          | 84939  | 149740964 | 149741164 |
| 4 | 149656025 | 149996076 + | NM_001085492 | Rere          | 89647  | 149745672 | 149745872 |
| 4 | 150202334 | 150229059 - | NR_040649    | 1700045H11Rik | 2116   | 150226743 | 150226943 |
| 4 | 150229200 | 150242990 + | NM_133753    | Errfi1        | -2257  | 150226743 | 150226943 |

|   |           |             |              |          |        |           |           |
|---|-----------|-------------|--------------|----------|--------|-----------|-----------|
| 4 | 150294264 | 150320212 + | NM_001077508 | Tnfrsf9  | 20352  | 150314616 | 150314816 |
| 4 | 150294264 | 150320212 + | NM_011612    | Tnfrsf9  | 20352  | 150314616 | 150314816 |
| 4 | 150302108 | 150320212 + | NM_001077509 | Tnfrsf9  | 12508  | 150314616 | 150314816 |
| 4 | 150371206 | 150375920 + | NM_011910    | Uts2     | -1792  | 150369214 | 150369414 |
| 4 | 150421414 | 150432063 - | NM_009498    | Vamp3    | -1263  | 150433326 | 150433526 |
| 4 | 151494985 | 151526317 - | NM_207687    | Espn     | -1542  | 151527859 | 151528059 |
| 4 | 151494985 | 151526317 - | NM_207687    | Espn     | 1325   | 151524792 | 151524992 |
| 4 | 151532976 | 151536579 + | NM_001301805 | Hes2     | -4917  | 151527859 | 151528059 |
| 4 | 151532976 | 151536579 + | NM_001301805 | Hes2     | -7984  | 151524792 | 151524992 |
| 4 | 151532976 | 151536579 + | NM_008236    | Hes2     | -4917  | 151527859 | 151528059 |
| 4 | 151532976 | 151536579 + | NM_008236    | Hes2     | -7984  | 151524792 | 151524992 |
| 4 | 151552209 | 151645965 + | NM_133348    | Acot7    | 49814  | 151602023 | 151602223 |
| 4 | 151552209 | 151645965 + | NM_133348    | Acot7    | 36965  | 151589174 | 151589374 |
| 4 | 151560243 | 151645965 + | NM_001146057 | Acot7    | 41780  | 151602023 | 151602223 |
| 4 | 151560243 | 151645965 + | NM_001146057 | Acot7    | 28931  | 151589174 | 151589374 |
| 4 | 151573953 | 151645965 + | NM_001146058 | Acot7    | 28070  | 151602023 | 151602223 |
| 4 | 151573953 | 151645965 + | NM_001146058 | Acot7    | 15221  | 151589174 | 151589374 |
| 4 | 151712760 | 151764304 + | NM_001081376 | Chd5     | 46004  | 151758764 | 151758964 |
| 4 | 151712760 | 151764304 + | NM_029216    | Chd5     | 46004  | 151758764 | 151758964 |
| 4 | 153531595 | 153534794 - | NM_026388    | Tprgl    | -1035  | 153535829 | 153536029 |
| 4 | 153544822 | 153649831 + | NM_001162977 | Megf6    | -8793  | 153535829 | 153536029 |
| 4 | 153652579 | 153674005 - | NM_001112744 | Arhgef16 | 1801   | 153672004 | 153672204 |
| 4 | 153690234 | 154010983 - | NM_001177995 | Prdm16   | 140387 | 153870396 | 153870596 |
| 4 | 153690234 | 154010983 - | NM_001177995 | Prdm16   | -2189  | 154013172 | 154013372 |
| 4 | 153690234 | 154010983 - | NM_001177995 | Prdm16   | 226123 | 153784660 | 153784860 |
| 4 | 153690234 | 154010983 - | NM_001177995 | Prdm16   | 207303 | 153803480 | 153803680 |
| 4 | 153690234 | 154010983 - | NM_001177995 | Prdm16   | 165264 | 153845519 | 153845719 |
| 4 | 153690234 | 154010983 - | NM_001177995 | Prdm16   | 218283 | 153792500 | 153792700 |
| 4 | 153690234 | 154010983 - | NM_001177995 | Prdm16   | 278192 | 153732591 | 153732791 |
| 4 | 153690234 | 154010983 - | NM_001177995 | Prdm16   | 276781 | 153734002 | 153734202 |



|   |           |             |              |               |        |           |           |
|---|-----------|-------------|--------------|---------------|--------|-----------|-----------|
| 4 | 153690234 | 154010983 - | NM_001177995 | Prdm16        | 307808 | 153702975 | 153703175 |
| 4 | 153690234 | 154010983 - | NM_001291026 | Prdm16        | 140387 | 153870396 | 153870596 |
| 4 | 153690234 | 154010983 - | NM_001291026 | Prdm16        | -2189  | 154013172 | 154013372 |
| 4 | 153690234 | 154010983 - | NM_001291026 | Prdm16        | 226123 | 153784660 | 153784860 |
| 4 | 153690234 | 154010983 - | NM_001291026 | Prdm16        | 207303 | 153803480 | 153803680 |
| 4 | 153690234 | 154010983 - | NM_001291026 | Prdm16        | 165264 | 153845519 | 153845719 |
| 4 | 153690234 | 154010983 - | NM_001291026 | Prdm16        | 218283 | 153792500 | 153792700 |
| 4 | 153690234 | 154010983 - | NM_001291026 | Prdm16        | 278192 | 153732591 | 153732791 |
| 4 | 153690234 | 154010983 - | NM_001291026 | Prdm16        | 276781 | 153734002 | 153734202 |
| 4 | 153690234 | 154010983 - | NM_001291026 | Prdm16        | 307808 | 153702975 | 153703175 |
| 4 | 153690234 | 154010983 - | NM_001291029 | Prdm16        | 140387 | 153870396 | 153870596 |
| 4 | 153690234 | 154010983 - | NM_001291029 | Prdm16        | -2189  | 154013172 | 154013372 |
| 4 | 153690234 | 154010983 - | NM_001291029 | Prdm16        | 226123 | 153784660 | 153784860 |
| 4 | 153690234 | 154010983 - | NM_001291029 | Prdm16        | 207303 | 153803480 | 153803680 |
| 4 | 153690234 | 154010983 - | NM_001291029 | Prdm16        | 165264 | 153845519 | 153845719 |
| 4 | 153690234 | 154010983 - | NM_001291029 | Prdm16        | 218283 | 153792500 | 153792700 |
| 4 | 153690234 | 154010983 - | NM_001291029 | Prdm16        | 278192 | 153732591 | 153732791 |
| 4 | 153690234 | 154010983 - | NM_001291029 | Prdm16        | 276781 | 153734002 | 153734202 |
| 4 | 153690234 | 154010983 - | NM_001291029 | Prdm16        | 307808 | 153702975 | 153703175 |
| 4 | 153690234 | 154010983 - | NM_027504    | Prdm16        | 140387 | 153870396 | 153870596 |
| 4 | 153690234 | 154010983 - | NM_027504    | Prdm16        | -2189  | 154013172 | 154013372 |
| 4 | 153690234 | 154010983 - | NM_027504    | Prdm16        | 226123 | 153784660 | 153784860 |
| 4 | 153690234 | 154010983 - | NM_027504    | Prdm16        | 207303 | 153803480 | 153803680 |
| 4 | 153690234 | 154010983 - | NM_027504    | Prdm16        | 165264 | 153845519 | 153845719 |
| 4 | 153690234 | 154010983 - | NM_027504    | Prdm16        | 218283 | 153792500 | 153792700 |
| 4 | 153690234 | 154010983 - | NM_027504    | Prdm16        | 278192 | 153732591 | 153732791 |
| 4 | 153690234 | 154010983 - | NM_027504    | Prdm16        | 276781 | 153734002 | 153734202 |
| 4 | 153690234 | 154010983 - | NM_027504    | Prdm16        | 307808 | 153702975 | 153703175 |
| 4 | 154004800 | 154010477 - | NR_045643    | 5930403L14Rik | -2695  | 154013172 | 154013372 |
| 4 | 154243694 | 154269640 + | NM_013783    | Mmel1         | 21789  | 154265483 | 154265683 |

|   |           |             |              |               |       |           |           |
|---|-----------|-------------|--------------|---------------|-------|-----------|-----------|
| 4 | 154270539 | 154273153 - | NM_025582    | Fam213b       | -5787 | 154278940 | 154279140 |
| 4 | 154296319 | 154302187 - | NM_178931    | Tnfrsf14      | -374  | 154302561 | 154302761 |
| 4 | 154448221 | 154460407 - | NM_026395    | Rer1          | 1731  | 154458476 | 154458676 |
| 4 | 154460686 | 154519617 + | NM_001081100 | Morn1         | 34091 | 154494777 | 154494977 |
| 4 | 154460686 | 154519617 + | NM_001081100 | Morn1         | 38891 | 154499577 | 154499777 |
| 4 | 154460686 | 154519617 + | NM_001081100 | Morn1         | -2010 | 154458476 | 154458676 |
| 4 | 154528184 | 154596645 - | NM_011385    | Ski           | 48740 | 154547705 | 154547905 |
| 4 | 154528184 | 154596645 - | NM_011385    | Ski           | 14863 | 154581582 | 154581782 |
| 4 | 154634227 | 154719899 - | NM_001039079 | Prkcz         | 65309 | 154654390 | 154654590 |
| 4 | 154634227 | 154735538 - | NM_008860    | Prkcz         | 80948 | 154654390 | 154654590 |
| 4 | 154759088 | 154772179 - | NM_008072    | Gabrd         | 7226  | 154764753 | 154764953 |
| 4 | 154775078 | 154795814 - | NR_102284    | 5830444B04Rik | -375  | 154796189 | 154796389 |
| 4 | 154775078 | 154795814 - | NR_102284    | 5830444B04Rik | 0     | 154795626 | 154795826 |
| 4 | 154782418 | 154795814 - | NR_102283    | 5830444B04Rik | -375  | 154796189 | 154796389 |
| 4 | 154782418 | 154795814 - | NR_102283    | 5830444B04Rik | 0     | 154795626 | 154795826 |
| 4 | 154782418 | 154795814 - | NR_102287    | 5830444B04Rik | -375  | 154796189 | 154796389 |
| 4 | 154782418 | 154795814 - | NR_102287    | 5830444B04Rik | 0     | 154795626 | 154795826 |
| 4 | 154783299 | 154796106 + | NM_001166029 | Cfap74        | 12327 | 154795626 | 154795826 |
| 4 | 154783299 | 154817220 + | NM_177674    | Cfap74        | 12890 | 154796189 | 154796389 |
| 4 | 154783299 | 154817220 + | NM_177674    | Cfap74        | 12327 | 154795626 | 154795826 |
| 4 | 154865470 | 154933379 + | NM_001160016 | Gnb1          | -2720 | 154862550 | 154862750 |
| 4 | 154865470 | 154933379 + | NM_001160016 | Gnb1          | -1549 | 154863721 | 154863921 |
| 4 | 154865470 | 154933379 + | NM_001160016 | Gnb1          | -2164 | 154863106 | 154863306 |
| 4 | 154865470 | 154933379 + | NM_001160016 | Gnb1          | -4311 | 154860959 | 154861159 |
| 4 | 154865470 | 154933379 + | NM_001160017 | Gnb1          | -2720 | 154862550 | 154862750 |
| 4 | 154865470 | 154933379 + | NM_001160017 | Gnb1          | -1549 | 154863721 | 154863921 |
| 4 | 154865470 | 154933379 + | NM_001160017 | Gnb1          | -2164 | 154863106 | 154863306 |
| 4 | 154865470 | 154933379 + | NM_001160017 | Gnb1          | -4311 | 154860959 | 154861159 |
| 4 | 154865470 | 154933379 + | NM_008142    | Gnb1          | -2720 | 154862550 | 154862750 |
| 4 | 154865470 | 154933379 + | NM_008142    | Gnb1          | -1549 | 154863721 | 154863921 |

|   |           |             |              |         |       |           |           |
|---|-----------|-------------|--------------|---------|-------|-----------|-----------|
| 4 | 154865470 | 154933379 + | NM_008142    | Gnb1    | -2164 | 154863106 | 154863306 |
| 4 | 154865470 | 154933379 + | NM_008142    | Gnb1    | -4311 | 154860959 | 154861159 |
| 4 | 154936501 | 154965111 + | NM_138671    | Nadk    | 9192  | 154945693 | 154945893 |
| 4 | 154936501 | 154965111 + | NM_138671    | Nadk    | -110  | 154936191 | 154936391 |
| 4 | 154937924 | 154965111 + | NM_001159637 | Nadk    | 7769  | 154945693 | 154945893 |
| 4 | 154937924 | 154965111 + | NM_001159637 | Nadk    | -1533 | 154936191 | 154936391 |
| 4 | 154975525 | 154997451 + | NM_177186    | Slc35e2 | 10625 | 154986150 | 154986350 |
| 4 | 154975525 | 154997451 + | NM_177186    | Slc35e2 | 3802  | 154979327 | 154979527 |
| 4 | 154982406 | 154998865 - | NR_040441    | Gm16023 | 12515 | 154986150 | 154986350 |
| 4 | 154998978 | 155024042 + | NM_007661    | Cdk11b  | 11462 | 155010440 | 155010640 |
| 4 | 155024764 | 155027494 - | NM_011985    | Mmp23   | -1539 | 155029033 | 155029233 |
| 4 | 155028581 | 155043364 - | NM_001256107 | Mib2    | 14131 | 155029033 | 155029233 |
| 4 | 155028581 | 155043364 - | NM_001256108 | Mib2    | 14131 | 155029033 | 155029233 |
| 4 | 155028581 | 155043364 - | NM_145124    | Mib2    | 14131 | 155029033 | 155029233 |
| 4 | 155317922 | 155333714 + | NM_001039157 | Ube2j2  | 1391  | 155319313 | 155319513 |
| 4 | 155317922 | 155333714 + | NM_001039157 | Ube2j2  | 9435  | 155327357 | 155327557 |
| 4 | 155317922 | 155333714 + | NM_001039157 | Ube2j2  | 680   | 155318602 | 155318802 |
| 4 | 155317922 | 155333714 + | NM_001039158 | Ube2j2  | 1391  | 155319313 | 155319513 |
| 4 | 155317922 | 155333714 + | NM_001039158 | Ube2j2  | 9435  | 155327357 | 155327557 |
| 4 | 155317922 | 155333714 + | NM_001039158 | Ube2j2  | 680   | 155318602 | 155318802 |
| 4 | 155317922 | 155333714 + | NM_001039159 | Ube2j2  | 1391  | 155319313 | 155319513 |
| 4 | 155317922 | 155333714 + | NM_001039159 | Ube2j2  | 9435  | 155327357 | 155327557 |
| 4 | 155317922 | 155333714 + | NM_001039159 | Ube2j2  | 680   | 155318602 | 155318802 |
| 4 | 155317922 | 155333714 + | NM_001284314 | Ube2j2  | 1391  | 155319313 | 155319513 |
| 4 | 155317922 | 155333714 + | NM_001284314 | Ube2j2  | 9435  | 155327357 | 155327557 |
| 4 | 155317922 | 155333714 + | NM_001284314 | Ube2j2  | 680   | 155318602 | 155318802 |
| 4 | 155317922 | 155333714 + | NM_021402    | Ube2j2  | 1391  | 155319313 | 155319513 |
| 4 | 155317922 | 155333714 + | NM_021402    | Ube2j2  | 9435  | 155327357 | 155327557 |
| 4 | 155317922 | 155333714 + | NM_021402    | Ube2j2  | 680   | 155318602 | 155318802 |
| 4 | 155318267 | 155333714 + | NM_001284312 | Ube2j2  | 1046  | 155319313 | 155319513 |

|   |           |             |              |               |        |           |           |
|---|-----------|-------------|--------------|---------------|--------|-----------|-----------|
| 4 | 155318267 | 155333714 + | NM_001284312 | Ube2j2        | 9090   | 155327357 | 155327557 |
| 4 | 155318267 | 155333714 + | NM_001284312 | Ube2j2        | 335    | 155318602 | 155318802 |
| 4 | 155320362 | 155331711 + | NR_002889    | Gm5801        | -849   | 155319313 | 155319513 |
| 4 | 155320362 | 155331711 + | NR_002889    | Gm5801        | 6995   | 155327357 | 155327557 |
| 4 | 155320362 | 155331711 + | NR_002889    | Gm5801        | -1560  | 155318602 | 155318802 |
| 4 | 155336421 | 155340739 + | NM_026125    | Fam132a       | -8864  | 155327357 | 155327557 |
| 4 | 155484107 | 155501373 + | NM_145557    | 9430015G10Rik | -6368  | 155477539 | 155477739 |
| 4 | 155484107 | 155501373 + | NM_177205    | 9430015G10Rik | -6368  | 155477539 | 155477739 |
| 4 | 155595565 | 155602652 - | NM_001008233 | Plekhn1       | -6950  | 155609602 | 155609802 |
| 4 | 155603153 | 155608967 - | NM_198305    | Klhl17        | -635   | 155609602 | 155609802 |
| 4 | 155604168 | 155604225 - | NR_106118    | Mir7658       | -5377  | 155609602 | 155609802 |
| 5 | 3344312   | 3522226 +   | NM_009873    | Cdk6          | 170656 | 3514968   | 3515168   |
| 5 | 3928186   | 4080205 +   | NM_194462    | Akap9         | 126031 | 4054217   | 4054417   |
| 5 | 3928186   | 4080205 +   | NM_194462    | Akap9         | 76946  | 4005132   | 4005332   |
| 5 | 3928186   | 4080205 +   | NM_194462    | Akap9         | 89975  | 4018161   | 4018361   |
| 5 | 4803384   | 5380252 -   | NM_011074    | Cdk14         | 11564  | 5368488   | 5368688   |
| 5 | 8490336   | 8622953 -   | NM_198620    | Rundc3b       | 1067   | 8621686   | 8621886   |
| 5 | 8490336   | 8622953 -   | NM_198620    | Rundc3b       | -6721  | 8629674   | 8629874   |
| 5 | 8660092   | 8748571 +   | NM_011076    | Abcb1a        | 4582   | 8664674   | 8664874   |
| 5 | 8660092   | 8748571 +   | NM_011076    | Abcb1a        | 7710   | 8667802   | 8668002   |
| 5 | 9100737   | 9118984 +   | NM_001081029 | Tmem243       | -5714  | 9094823   | 9095023   |
| 5 | 12383166  | 12588944 +  | NM_028882    | Sema3d        | 30498  | 12413664  | 12413864  |
| 5 | 14933631  | 15220411 -  | NM_001310450 | LOC105242399  | 33725  | 15186486  | 15186686  |
| 5 | 15186528  | 15220415 +  | NR_001585    | Speer4cos     | 0      | 15186486  | 15186686  |
| 5 | 17080634  | 17236086 +  | NM_013657    | Sema3c        | 73973  | 17154607  | 17154807  |
| 5 | 17080634  | 17236086 +  | NM_013657    | Sema3c        | 73100  | 17153734  | 17153934  |
| 5 | 17287508  | 17341715 -  | NM_001159555 | Cd36          | 6488   | 17335027  | 17335227  |
| 5 | 17287508  | 17355611 -  | NM_001159556 | Cd36          | 20384  | 17335027  | 17335227  |
| 5 | 17287508  | 17355611 -  | NM_001159557 | Cd36          | 20384  | 17335027  | 17335227  |
| 5 | 17287508  | 17394778 -  | NM_001159558 | Cd36          | 11626  | 17382952  | 17383152  |

|   |          |            |              |               |        |          |          |
|---|----------|------------|--------------|---------------|--------|----------|----------|
| 5 | 17287508 | 17394778 - | NM_001159558 | Cd36          | 59551  | 17335027 | 17335227 |
| 5 | 17287508 | 17341715 - | NM_007643    | Cd36          | 6488   | 17335027 | 17335227 |
| 5 | 20398842 | 20457641 - | NM_001080977 | Rsbn1l        | 20143  | 20437298 | 20437498 |
| 5 | 20398842 | 20457641 - | NM_001080977 | Rsbn1l        | -688   | 20458329 | 20458529 |
| 5 | 20398842 | 20457641 - | NM_001080977 | Rsbn1l        | 37970  | 20419471 | 20419671 |
| 5 | 20456807 | 20462217 + | NR_030699    | A630072M18Rik | 1522   | 20458329 | 20458529 |
| 5 | 20492463 | 20561616 - | NM_011203    | Ptpn12        | 65258  | 20496158 | 20496358 |
| 5 | 20798779 | 20930496 - | NM_029195    | Ccdc146       | 40054  | 20890242 | 20890442 |
| 5 | 20798779 | 20930496 - | NM_029195    | Ccdc146       | 97860  | 20832436 | 20832636 |
| 5 | 20798779 | 20930496 - | NM_029195    | Ccdc146       | 93048  | 20837248 | 20837448 |
| 5 | 21314819 | 21367825 - | NM_001289787 | Slc26a5       | 14701  | 21352924 | 21353124 |
| 5 | 21314819 | 21367825 - | NM_001289788 | Slc26a5       | 14701  | 21352924 | 21353124 |
| 5 | 21314819 | 21371423 - | NM_030727    | Slc26a5       | 18299  | 21352924 | 21353124 |
| 5 | 22252011 | 22781416 + | NM_001081231 | Lhfp13        | 503811 | 22755822 | 22756022 |
| 5 | 22252011 | 22781416 + | NM_029990    | Lhfp13        | 503811 | 22755822 | 22756022 |
| 5 | 22937626 | 22940172 - | NR_040469    | 5031425E22Rik | 2955   | 22937017 | 22937217 |
| 5 | 22937626 | 22940172 - | NR_040469    | 5031425E22Rik | -1464  | 22941636 | 22941836 |
| 5 | 22940247 | 23010048 + | NM_026984    | Kmt2e         | -3030  | 22937017 | 22937217 |
| 5 | 22940247 | 23010048 + | NM_026984    | Kmt2e         | 1389   | 22941636 | 22941836 |
| 5 | 23245983 | 23289530 - | NM_001289780 | Pus7          | 3986   | 23285344 | 23285544 |
| 5 | 23245983 | 23285482 - | NM_001289781 | Pus7          | 0      | 23285344 | 23285544 |
| 5 | 23245983 | 23289530 - | NM_178403    | Pus7          | 3986   | 23285344 | 23285544 |
| 5 | 23293529 | 23326188 + | NM_001310467 | Rint1         | -7985  | 23285344 | 23285544 |
| 5 | 23293529 | 23326188 + | NM_177323    | Rint1         | -7985  | 23285344 | 23285544 |
| 5 | 23946858 | 23951054 - | NM_023229    | Fastk         | -1798  | 23952852 | 23953052 |
| 5 | 23951281 | 23953665 - | NM_022418    | Tmub1         | 613    | 23952852 | 23953052 |
| 5 | 23957995 | 23989003 + | NM_001256431 | Agap3         | -4943  | 23952852 | 23953052 |
| 5 | 23957995 | 24007866 + | NM_139153    | Agap3         | -4943  | 23952852 | 23953052 |
| 5 | 24191633 | 24216197 + | NM_001305264 | Nub1          | 419    | 24192052 | 24192252 |
| 5 | 24191633 | 24216197 + | NM_016736    | Nub1          | 419    | 24192052 | 24192252 |

|   |          |            |              |         |        |          |          |
|---|----------|------------|--------------|---------|--------|----------|----------|
| 5 | 24368553 | 24414328 - | NM_001170555 | Prkag2  | 626    | 24413502 | 24413702 |
| 5 | 24368553 | 24414328 - | NM_001170556 | Prkag2  | 626    | 24413502 | 24413702 |
| 5 | 24368553 | 24501572 - | NM_001310480 | Prkag2  | 15917  | 24485455 | 24485655 |
| 5 | 24368553 | 24501572 - | NM_001310480 | Prkag2  | 58962  | 24442410 | 24442610 |
| 5 | 24368553 | 24501572 - | NM_001310480 | Prkag2  | 27525  | 24473847 | 24474047 |
| 5 | 24368553 | 24501572 - | NM_001310480 | Prkag2  | 26667  | 24474705 | 24474905 |
| 5 | 24368553 | 24501572 - | NM_001310480 | Prkag2  | 39391  | 24461981 | 24462181 |
| 5 | 24368553 | 24501572 - | NM_001310480 | Prkag2  | 87870  | 24413502 | 24413702 |
| 5 | 24368553 | 24501572 - | NM_001310480 | Prkag2  | 61309  | 24440063 | 24440263 |
| 5 | 24368553 | 24606461 - | NM_145401    | Prkag2  | 120806 | 24485455 | 24485655 |
| 5 | 24368553 | 24606461 - | NM_145401    | Prkag2  | 64351  | 24541910 | 24542110 |
| 5 | 24368553 | 24606461 - | NM_145401    | Prkag2  | 23155  | 24583106 | 24583306 |
| 5 | 24368553 | 24606461 - | NM_145401    | Prkag2  | 65037  | 24541224 | 24541424 |
| 5 | 24368553 | 24606461 - | NM_145401    | Prkag2  | 163851 | 24442410 | 24442610 |
| 5 | 24368553 | 24606461 - | NM_145401    | Prkag2  | 132414 | 24473847 | 24474047 |
| 5 | 24368553 | 24606461 - | NM_145401    | Prkag2  | 131556 | 24474705 | 24474905 |
| 5 | 24368553 | 24606461 - | NM_145401    | Prkag2  | 144280 | 24461981 | 24462181 |
| 5 | 24368553 | 24606461 - | NM_145401    | Prkag2  | 192759 | 24413502 | 24413702 |
| 5 | 24368553 | 24606461 - | NM_145401    | Prkag2  | 166198 | 24440063 | 24440263 |
| 5 | 24728711 | 24771737 + | NM_144908    | Galnt11 | 6632   | 24735343 | 24735543 |
| 5 | 24728711 | 24771737 + | NM_144908    | Galnt11 | 4010   | 24732721 | 24732921 |
| 5 | 25021885 | 25023846 + | NM_198621    | Cct8l1  | -3448  | 25018237 | 25018437 |
| 5 | 26344961 | 26431832 - | NM_001281516 | Gm21671 | 8323   | 26423309 | 26423509 |
| 5 | 26408712 | 26415805 - | NM_001177579 | Gm10471 | -7504  | 26423309 | 26423509 |
| 5 | 27143897 | 28054041 + | NM_010075    | Dpp6    | 798669 | 27942566 | 27942766 |
| 5 | 27143897 | 28054041 + | NM_010075    | Dpp6    | 47950  | 27191847 | 27192047 |
| 5 | 27231318 | 28054041 + | NM_001198886 | Dpp6    | 711248 | 27942566 | 27942766 |
| 5 | 27375739 | 28054041 + | NM_207282    | Dpp6    | 566827 | 27942566 | 27942766 |
| 5 | 27588475 | 28054041 + | NM_001136060 | Dpp6    | 354091 | 27942566 | 27942766 |
| 5 | 28397952 | 28405203 + | NM_153526    | Insig1  | -4785  | 28392967 | 28393167 |

|   |          |            |              |               |       |          |          |
|---|----------|------------|--------------|---------------|-------|----------|----------|
| 5 | 28397952 | 28405203 + | NM_153526    | Insig1        | 407   | 28398359 | 28398559 |
| 5 | 28397952 | 28405203 + | NM_153526    | Insig1        | -1954 | 28395798 | 28395998 |
| 5 | 28397952 | 28405203 + | NM_153526    | Insig1        | -9938 | 28387814 | 28388014 |
| 5 | 28397952 | 28405203 + | NM_153526    | Insig1        | -5316 | 28392436 | 28392636 |
| 5 | 28492236 | 28498707 + | NM_010134    | En2           | -521  | 28491515 | 28491715 |
| 5 | 28527359 | 28536709 - | NM_001310511 | Cnpy1         | -1165 | 28537874 | 28538074 |
| 5 | 28527359 | 28572329 - | NM_001310512 | Cnpy1         | 34255 | 28537874 | 28538074 |
| 5 | 28532003 | 28564414 - | NM_175651    | Cnpy1         | 26340 | 28537874 | 28538074 |
| 5 | 28643729 | 28745783 + | NM_028234    | Rbm33         | 99250 | 28742979 | 28743179 |
| 5 | 28643729 | 28745783 + | NM_028234    | Rbm33         | 56784 | 28700513 | 28700713 |
| 5 | 28643729 | 28745783 + | NM_028234    | Rbm33         | 82559 | 28726288 | 28726488 |
| 5 | 28793524 | 29045750 + | NR_015562    | 9530036O11Rik | 96473 | 28889997 | 28890197 |
| 5 | 28793524 | 29045750 + | NR_015562    | 9530036O11Rik | 33842 | 28827366 | 28827566 |
| 5 | 29522533 | 29552065 + | NM_001289757 | Rnf32         | 16124 | 29538657 | 29538857 |
| 5 | 29522533 | 29552065 + | NM_021470    | Rnf32         | 16124 | 29538657 | 29538857 |
| 5 | 29522533 | 29552065 + | NR_110371    | Rnf32         | 16124 | 29538657 | 29538857 |
| 5 | 30061874 | 30062477 - | NR_028426    | Gm5129        | 168   | 30062109 | 30062309 |
| 5 | 30062438 | 30113019 + | NM_001037940 | Dnajb6        | 17131 | 30079569 | 30079769 |
| 5 | 30062438 | 30113019 + | NM_001037940 | Dnajb6        | -129  | 30062109 | 30062309 |
| 5 | 30062438 | 30084509 + | NM_001037941 | Dnajb6        | 17131 | 30079569 | 30079769 |
| 5 | 30062438 | 30084509 + | NM_001037941 | Dnajb6        | -129  | 30062109 | 30062309 |
| 5 | 30062438 | 30093642 + | NM_001127367 | Dnajb6        | 17131 | 30079569 | 30079769 |
| 5 | 30062438 | 30093642 + | NM_001127367 | Dnajb6        | -129  | 30062109 | 30062309 |
| 5 | 30062438 | 30093642 + | NM_011847    | Dnajb6        | 17131 | 30079569 | 30079769 |
| 5 | 30062438 | 30093642 + | NM_011847    | Dnajb6        | -129  | 30062109 | 30062309 |
| 5 | 30481793 | 30511134 + | NM_001289798 | Hadhb         | 11665 | 30493458 | 30493658 |
| 5 | 30481793 | 30511134 + | NM_001289798 | Hadhb         | 15115 | 30496908 | 30497108 |
| 5 | 30481793 | 30511134 + | NM_001289799 | Hadhb         | 11665 | 30493458 | 30493658 |
| 5 | 30481793 | 30511134 + | NM_001289799 | Hadhb         | 15115 | 30496908 | 30497108 |
| 5 | 30481793 | 30511134 + | NM_145558    | Hadhb         | 11665 | 30493458 | 30493658 |

|   |          |            |              |         |       |          |          |
|---|----------|------------|--------------|---------|-------|----------|----------|
| 5 | 30481793 | 30511134 + | NM_145558    | Hadhb   | 15115 | 30496908 | 30497108 |
| 5 | 30497279 | 30497357 + | NR_035486    | Mir1960 | -3621 | 30493458 | 30493658 |
| 5 | 30497279 | 30497357 + | NR_035486    | Mir1960 | -171  | 30496908 | 30497108 |
| 5 | 30559158 | 30598977 + | NM_027652    | Ept1    | 6022  | 30565180 | 30565380 |
| 5 | 30607914 | 30668994 + | NM_001033460 | Drc1    | 44685 | 30652599 | 30652799 |
| 5 | 30607914 | 30668994 + | NM_001033460 | Drc1    | 5820  | 30613734 | 30613934 |
| 5 | 30607914 | 30668994 + | NM_001033460 | Drc1    | 37622 | 30645536 | 30645736 |
| 5 | 30607914 | 30668994 + | NM_001033460 | Drc1    | -1933 | 30605781 | 30605981 |
| 5 | 31117014 | 31168480 + | NM_133350    | Mapre3  | 45658 | 31162672 | 31162872 |
| 5 | 31164180 | 31168480 + | NM_001310516 | Mapre3  | -1308 | 31162672 | 31162872 |
| 5 | 31172020 | 31179841 + | NM_144525    | Tmem214 | -9148 | 31162672 | 31162872 |
| 5 | 31191225 | 31199061 + | NM_174849    | Agbl5   | 1684  | 31192909 | 31193109 |
| 5 | 31191308 | 31209040 + | NR_122116    | Agbl5   | 1601  | 31192909 | 31193109 |
| 5 | 31191308 | 31209040 + | NR_122116    | Agbl5   | 11661 | 31202969 | 31203169 |
| 5 | 31191308 | 31209040 + | NR_122117    | Agbl5   | 1601  | 31192909 | 31193109 |
| 5 | 31191308 | 31209040 + | NR_122117    | Agbl5   | 11661 | 31202969 | 31203169 |
| 5 | 31191379 | 31209040 + | NM_001048192 | Agbl5   | 1530  | 31192909 | 31193109 |
| 5 | 31191379 | 31209040 + | NM_001048192 | Agbl5   | 11590 | 31202969 | 31203169 |
| 5 | 31191707 | 31205860 + | NM_001294262 | Agbl5   | 1202  | 31192909 | 31193109 |
| 5 | 31191707 | 31205860 + | NM_001294262 | Agbl5   | 11262 | 31202969 | 31203169 |
| 5 | 31208889 | 31210162 - | NM_001134692 | Ost4    | -4023 | 31214185 | 31214385 |
| 5 | 31208889 | 31210162 - | NM_024460    | Ost4    | -4023 | 31214185 | 31214385 |
| 5 | 31216159 | 31223647 + | NM_133918    | Emilin1 | -1774 | 31214185 | 31214385 |
| 5 | 31223932 | 31233622 + | NM_001310524 | Khk     | 3798  | 31227730 | 31227930 |
| 5 | 31223932 | 31233622 + | NM_001310524 | Khk     | 5975  | 31229907 | 31230107 |
| 5 | 31223932 | 31233622 + | NM_001310524 | Khk     | -9547 | 31214185 | 31214385 |
| 5 | 31223932 | 31233622 + | NM_001310524 | Khk     | 1207  | 31225139 | 31225339 |
| 5 | 31223932 | 31233622 + | NM_001310524 | Khk     | 218   | 31224150 | 31224350 |
| 5 | 31223932 | 31233622 + | NM_001310525 | Khk     | 3798  | 31227730 | 31227930 |
| 5 | 31223932 | 31233622 + | NM_001310525 | Khk     | 5975  | 31229907 | 31230107 |



|   |          |            |              |          |        |          |          |
|---|----------|------------|--------------|----------|--------|----------|----------|
| 5 | 31223932 | 31233622 + | NM_001310525 | Khk      | -9547  | 31214185 | 31214385 |
| 5 | 31223932 | 31233622 + | NM_001310525 | Khk      | 1207   | 31225139 | 31225339 |
| 5 | 31223932 | 31233622 + | NM_001310525 | Khk      | 218    | 31224150 | 31224350 |
| 5 | 31223932 | 31233622 + | NM_008439    | Khk      | 3798   | 31227730 | 31227930 |
| 5 | 31223932 | 31233622 + | NM_008439    | Khk      | 5975   | 31229907 | 31230107 |
| 5 | 31223932 | 31233622 + | NM_008439    | Khk      | -9547  | 31214185 | 31214385 |
| 5 | 31223932 | 31233622 + | NM_008439    | Khk      | 1207   | 31225139 | 31225339 |
| 5 | 31223932 | 31233622 + | NM_008439    | Khk      | 218    | 31224150 | 31224350 |
| 5 | 31235516 | 31247801 - | NM_001160149 | Cgref1   | -3515  | 31251316 | 31251516 |
| 5 | 31235516 | 31247854 - | NM_026770    | Cgref1   | -3462  | 31251316 | 31251516 |
| 5 | 31252439 | 31257469 + | NR_003522    | Abhd1    | -923   | 31251316 | 31251516 |
| 5 | 31252479 | 31257465 + | NM_021304    | Abhd1    | -963   | 31251316 | 31251516 |
| 5 | 31254040 | 31262701 - | NM_001294302 | Preb     | -9224  | 31271925 | 31272125 |
| 5 | 31254040 | 31262701 - | NM_016703    | Preb     | -9224  | 31271925 | 31272125 |
| 5 | 31271050 | 31279392 + | NM_053085    | Tcf23    | 4027   | 31275077 | 31275277 |
| 5 | 31271050 | 31279392 + | NM_053085    | Tcf23    | 875    | 31271925 | 31272125 |
| 5 | 31338409 | 31350936 - | NM_001177621 | Slc5a6   | 7623   | 31343113 | 31343313 |
| 5 | 31338409 | 31351298 - | NM_001177622 | Slc5a6   | 7985   | 31343113 | 31343313 |
| 5 | 31338409 | 31350453 - | NM_177870    | Slc5a6   | 7140   | 31343113 | 31343313 |
| 5 | 31351013 | 31357007 + | NM_027855    | Atraid   | -7700  | 31343113 | 31343313 |
| 5 | 31351013 | 31357007 + | NM_212470    | Atraid   | -7700  | 31343113 | 31343313 |
| 5 | 31816942 | 31829136 - | NM_028150    | Supt7l   | -651   | 31829787 | 31829987 |
| 5 | 31829368 | 31856412 + | NM_009206    | Slc4a1ap | 419    | 31829787 | 31829987 |
| 5 | 31926812 | 31999984 - | NM_153196    | Rbks     | 5383   | 31994401 | 31994601 |
| 5 | 32000423 | 32387113 + | NM_144541    | Bre      | 331949 | 32332372 | 32332572 |
| 5 | 32000423 | 32387113 + | NM_144541    | Bre      | 335253 | 32335676 | 32335876 |
| 5 | 32000423 | 32387113 + | NM_144541    | Bre      | 333038 | 32333461 | 32333661 |
| 5 | 32000423 | 32387113 + | NM_144541    | Bre      | 67959  | 32068382 | 32068582 |
| 5 | 32000423 | 32387113 + | NM_144541    | Bre      | 311337 | 32311760 | 32311960 |
| 5 | 32000423 | 32387113 + | NM_144541    | Bre      | 222998 | 32223421 | 32223621 |

|   |          |            |           |     |        |          |          |
|---|----------|------------|-----------|-----|--------|----------|----------|
| 5 | 32000423 | 32387113 + | NM_144541 | Bre | 35025  | 32035448 | 32035648 |
| 5 | 32000423 | 32387113 + | NM_144541 | Bre | 51369  | 32051792 | 32051992 |
| 5 | 32000423 | 32387113 + | NM_144541 | Bre | -5822  | 31994401 | 31994601 |
| 5 | 32000423 | 32387113 + | NM_181279 | Bre | 331949 | 32332372 | 32332572 |
| 5 | 32000423 | 32387113 + | NM_181279 | Bre | 335253 | 32335676 | 32335876 |
| 5 | 32000423 | 32387113 + | NM_181279 | Bre | 333038 | 32333461 | 32333661 |
| 5 | 32000423 | 32387113 + | NM_181279 | Bre | 67959  | 32068382 | 32068582 |
| 5 | 32000423 | 32387113 + | NM_181279 | Bre | 311337 | 32311760 | 32311960 |
| 5 | 32000423 | 32387113 + | NM_181279 | Bre | 222998 | 32223421 | 32223621 |
| 5 | 32000423 | 32387113 + | NM_181279 | Bre | 35025  | 32035448 | 32035648 |
| 5 | 32000423 | 32387113 + | NM_181279 | Bre | 51369  | 32051792 | 32051992 |
| 5 | 32000423 | 32387113 + | NM_181279 | Bre | -5822  | 31994401 | 31994601 |
| 5 | 32000423 | 32387113 + | NM_181280 | Bre | 331949 | 32332372 | 32332572 |
| 5 | 32000423 | 32387113 + | NM_181280 | Bre | 335253 | 32335676 | 32335876 |
| 5 | 32000423 | 32387113 + | NM_181280 | Bre | 333038 | 32333461 | 32333661 |
| 5 | 32000423 | 32387113 + | NM_181280 | Bre | 67959  | 32068382 | 32068582 |
| 5 | 32000423 | 32387113 + | NM_181280 | Bre | 311337 | 32311760 | 32311960 |
| 5 | 32000423 | 32387113 + | NM_181280 | Bre | 222998 | 32223421 | 32223621 |
| 5 | 32000423 | 32387113 + | NM_181280 | Bre | 35025  | 32035448 | 32035648 |
| 5 | 32000423 | 32387113 + | NM_181280 | Bre | 51369  | 32051792 | 32051992 |
| 5 | 32000423 | 32387113 + | NM_181280 | Bre | -5822  | 31994401 | 31994601 |
| 5 | 32000423 | 32387113 + | NM_181281 | Bre | 331949 | 32332372 | 32332572 |
| 5 | 32000423 | 32387113 + | NM_181281 | Bre | 335253 | 32335676 | 32335876 |
| 5 | 32000423 | 32387113 + | NM_181281 | Bre | 333038 | 32333461 | 32333661 |
| 5 | 32000423 | 32387113 + | NM_181281 | Bre | 67959  | 32068382 | 32068582 |
| 5 | 32000423 | 32387113 + | NM_181281 | Bre | 311337 | 32311760 | 32311960 |
| 5 | 32000423 | 32387113 + | NM_181281 | Bre | 222998 | 32223421 | 32223621 |
| 5 | 32000423 | 32387113 + | NM_181281 | Bre | 35025  | 32035448 | 32035648 |
| 5 | 32000423 | 32387113 + | NM_181281 | Bre | 51369  | 32051792 | 32051992 |
| 5 | 32000423 | 32387113 + | NM_181281 | Bre | -5822  | 31994401 | 31994601 |

|   |          |            |              |        |        |          |          |
|---|----------|------------|--------------|--------|--------|----------|----------|
| 5 | 32000423 | 32387113 + | NM_181282    | Bre    | 331949 | 32332372 | 32332572 |
| 5 | 32000423 | 32387113 + | NM_181282    | Bre    | 335253 | 32335676 | 32335876 |
| 5 | 32000423 | 32387113 + | NM_181282    | Bre    | 333038 | 32333461 | 32333661 |
| 5 | 32000423 | 32387113 + | NM_181282    | Bre    | 67959  | 32068382 | 32068582 |
| 5 | 32000423 | 32387113 + | NM_181282    | Bre    | 311337 | 32311760 | 32311960 |
| 5 | 32000423 | 32387113 + | NM_181282    | Bre    | 222998 | 32223421 | 32223621 |
| 5 | 32000423 | 32387113 + | NM_181282    | Bre    | 35025  | 32035448 | 32035648 |
| 5 | 32000423 | 32387113 + | NM_181282    | Bre    | 51369  | 32051792 | 32051992 |
| 5 | 32000423 | 32387113 + | NM_181282    | Bre    | -5822  | 31994401 | 31994601 |
| 5 | 32438845 | 32460213 + | NM_008037    | Fosl2  | 2411   | 32441256 | 32441456 |
| 5 | 32438845 | 32460213 + | NM_008037    | Fosl2  | -2030  | 32436615 | 32436815 |
| 5 | 32535081 | 32632660 + | NM_030072    | Plb1   | 59001  | 32594082 | 32594282 |
| 5 | 32535081 | 32632660 + | NM_030072    | Plb1   | 29938  | 32565019 | 32565219 |
| 5 | 32541457 | 32666730 + | NM_001081407 | Plb1   | 52625  | 32594082 | 32594282 |
| 5 | 32541457 | 32666730 + | NM_001081407 | Plb1   | 99306  | 32640763 | 32640963 |
| 5 | 32541457 | 32666730 + | NM_001081407 | Plb1   | 23562  | 32565019 | 32565219 |
| 5 | 32761343 | 32796086 + | NM_172707    | Ppp1cb | -279   | 32760864 | 32761064 |
| 5 | 32761343 | 32796086 + | NM_172707    | Ppp1cb | 13363  | 32774706 | 32774906 |
| 5 | 32913544 | 32989440 + | NM_001205132 | Yes1   | 40396  | 32953940 | 32954140 |
| 5 | 32913544 | 32989440 + | NM_001205133 | Yes1   | 40396  | 32953940 | 32954140 |
| 5 | 32913544 | 32989440 + | NM_009535    | Yes1   | 40396  | 32953940 | 32954140 |
| 5 | 33078962 | 33128276 - | NM_177298    | Pisd   | 47450  | 33080626 | 33080826 |
| 5 | 33078962 | 33128276 - | NM_177298    | Pisd   | 47879  | 33080197 | 33080397 |
| 5 | 33446868 | 33505349 + | NM_019810    | Slc5a1 | 31580  | 33478448 | 33478648 |
| 5 | 33446868 | 33505349 + | NM_019810    | Slc5a1 | 35065  | 33481933 | 33482133 |
| 5 | 33446868 | 33505349 + | NM_019810    | Slc5a1 | 22316  | 33469184 | 33469384 |
| 5 | 33678221 | 33715944 + | NM_021500    | Maea   | -238   | 33677783 | 33677983 |
| 5 | 33678221 | 33715944 + | NM_021500    | Maea   | 16487  | 33694708 | 33694908 |
| 5 | 33721345 | 33762404 + | NM_001081101 | Uvssa  | 12815  | 33734160 | 33734360 |
| 5 | 33943002 | 33972285 - | NM_178390    | Fam53a | -8392  | 33980677 | 33980877 |

|   |          |            |              |               |        |          |          |
|---|----------|------------|--------------|---------------|--------|----------|----------|
| 5 | 34064373 | 34079718 + | NM_001163215 | Fgfr3         | -1032  | 34063141 | 34063341 |
| 5 | 34064373 | 34079718 + | NM_001205270 | Fgfr3         | -1032  | 34063141 | 34063341 |
| 5 | 34064373 | 34079718 + | NM_008010    | Fgfr3         | -1032  | 34063141 | 34063341 |
| 5 | 34064955 | 34079718 + | NM_001163216 | Fgfr3         | -1614  | 34063141 | 34063341 |
| 5 | 34064955 | 34079718 + | NM_001163217 | Fgfr3         | -1614  | 34063141 | 34063341 |
| 5 | 34712582 | 34829108 + | NM_001243123 | Fam193a       | 30429  | 34743011 | 34743211 |
| 5 | 35104389 | 35255184 + | NM_010414    | Htt           | 83473  | 35187862 | 35188062 |
| 5 | 35104389 | 35255184 + | NM_010414    | Htt           | 125459 | 35229848 | 35230048 |
| 5 | 35292097 | 35376243 + | NM_173402    | Rgs12         | 30715  | 35322812 | 35323012 |
| 5 | 35292097 | 35376243 + | NM_173402    | Rgs12         | 38044  | 35330141 | 35330341 |
| 5 | 35923876 | 35931413 - | NR_045807    | 4931431C16Rik | -7321  | 35938734 | 35938934 |
| 5 | 35925709 | 35956451 + | NM_030721    | Acox3         | 13025  | 35938734 | 35938934 |
| 5 | 36039829 | 36071926 - | NM_194344    | Sh3tc1        | -8043  | 36079969 | 36080169 |
| 5 | 36833253 | 36928876 - | NM_001113362 | Tbc1d14       | 4951   | 36923725 | 36923925 |
| 5 | 36833253 | 36928876 - | NM_001113362 | Tbc1d14       | 26375  | 36902301 | 36902501 |
| 5 | 36833253 | 36925047 - | NM_133910    | Tbc1d14       | 1122   | 36923725 | 36923925 |
| 5 | 36833253 | 36925047 - | NM_133910    | Tbc1d14       | 22546  | 36902301 | 36902501 |
| 5 | 36943138 | 37087261 - | NM_001081232 | D5Ertd579e    | -4984  | 37092245 | 37092445 |
| 5 | 36943138 | 37087261 - | NM_001081232 | D5Ertd579e    | 135174 | 36951887 | 36952087 |
| 5 | 36943138 | 37087261 - | NM_001081232 | D5Ertd579e    | 28669  | 37058392 | 37058592 |
| 5 | 36943138 | 37087261 - | NM_001081232 | D5Ertd579e    | -1301  | 37088562 | 37088762 |
| 5 | 36943138 | 37087261 - | NM_001081232 | D5Ertd579e    | 133544 | 36953517 | 36953717 |
| 5 | 37138613 | 37139919 - | NM_133724    | Bloc1s4       | -94    | 37140013 | 37140213 |
| 5 | 37357343 | 37380222 - | NM_011716    | Wfs1          | 5343   | 37374679 | 37374879 |
| 5 | 37442096 | 37516538 + | NM_178394    | Jakmip1       | 979    | 37443075 | 37443275 |
| 5 | 37838064 | 38108393 - | NM_022416    | Stk32b        | 223176 | 37885017 | 37885217 |
| 5 | 37838064 | 38108393 - | NM_022416    | Stk32b        | 65670  | 38042523 | 38042723 |
| 5 | 38740512 | 38874625 - | NM_001012363 | Slc2a9        | -8554  | 38883179 | 38883379 |
| 5 | 38740512 | 38893392 - | NM_145559    | Slc2a9        | 10013  | 38883179 | 38883379 |
| 5 | 38740512 | 38893392 - | NM_145559    | Slc2a9        | -7446  | 38900838 | 38901038 |

|   |          |            |              |          |        |          |          |
|---|----------|------------|--------------|----------|--------|----------|----------|
| 5 | 38918052 | 38952835 - | NM_011715    | Wdr1     | -783   | 38953618 | 38953818 |
| 5 | 38918052 | 38952835 - | NM_011715    | Wdr1     | 10860  | 38941775 | 38941975 |
| 5 | 39097699 | 39267933 - | NM_013748    | Clnk     | 26202  | 39241531 | 39241731 |
| 5 | 39097699 | 39267933 - | NM_013748    | Clnk     | 30933  | 39236800 | 39237000 |
| 5 | 40005174 | 40035871 - | NM_010474    | Hs3st1   | 276    | 40035395 | 40035595 |
| 5 | 44053618 | 44132210 + | NM_172274    | Cc2d2a   | 64419  | 44118037 | 44118237 |
| 5 | 44135857 | 44173389 - | NM_001159963 | Fbxl5    | -7348  | 44180737 | 44180937 |
| 5 | 44148988 | 44173389 - | NM_178729    | Fbxl5    | -7348  | 44180737 | 44180937 |
| 5 | 44210132 | 44234708 + | NM_009763    | Bst1     | 3993   | 44214125 | 44214325 |
| 5 | 44210132 | 44234708 + | NM_009763    | Bst1     | 24572  | 44234704 | 44234904 |
| 5 | 44210132 | 44234708 + | NM_009763    | Bst1     | 22419  | 44232551 | 44232751 |
| 5 | 44260066 | 44303614 + | NM_007646    | Cd38     | -4861  | 44255005 | 44255205 |
| 5 | 44384861 | 44492976 - | NM_001163577 | Prom1    | 103178 | 44389598 | 44389798 |
| 5 | 44384861 | 44486008 - | NM_001163584 | Prom1    | 96210  | 44389598 | 44389798 |
| 5 | 44384861 | 44486008 - | NM_001163585 | Prom1    | 96210  | 44389598 | 44389798 |
| 5 | 44384861 | 44492976 - | NM_008935    | Prom1    | 103178 | 44389598 | 44389798 |
| 5 | 44566401 | 44617846 - | NM_173764    | Tapt1    | -862   | 44618708 | 44618908 |
| 5 | 44863372 | 45190986 - | NM_001077398 | Ldb2     | 218675 | 44972111 | 44972311 |
| 5 | 44863372 | 45190986 - | NM_001286348 | Ldb2     | 218675 | 44972111 | 44972311 |
| 5 | 44863372 | 45190986 - | NM_010698    | Ldb2     | 218675 | 44972111 | 44972311 |
| 5 | 45884613 | 45903931 + | NM_024434    | Lap3     | 12386  | 45896999 | 45897199 |
| 5 | 45884613 | 45903931 + | NM_024434    | Lap3     | -1214  | 45883199 | 45883399 |
| 5 | 46088423 | 46248780 - | NM_178142    | Lcorl    | 50147  | 46198433 | 46198633 |
| 5 | 46121571 | 46248780 - | NM_001163073 | Lcorl    | 50147  | 46198433 | 46198633 |
| 5 | 46121571 | 46247792 - | NM_172153    | Lcorl    | 49159  | 46198433 | 46198633 |
| 5 | 50351190 | 50450236 - | NM_133911    | Adgra2   | 9790   | 50440246 | 50440446 |
| 5 | 51845488 | 51945161 - | NM_008904    | Ppargc1a | 25960  | 51919001 | 51919201 |
| 5 | 51845488 | 51945161 - | NM_008904    | Ppargc1a | 1269   | 51943692 | 51943892 |
| 5 | 51845488 | 51945161 - | NM_008904    | Ppargc1a | 15399  | 51929562 | 51929762 |
| 5 | 51845488 | 51945161 - | NM_008904    | Ppargc1a | 42178  | 51902783 | 51902983 |

|   |          |            |              |               |        |          |          |
|---|----------|------------|--------------|---------------|--------|----------|----------|
| 5 | 51845488 | 51945161 - | NR_027710    | Ppargc1a      | 25960  | 51919001 | 51919201 |
| 5 | 51845488 | 51945161 - | NR_027710    | Ppargc1a      | 1269   | 51943692 | 51943892 |
| 5 | 51845488 | 51945161 - | NR_027710    | Ppargc1a      | 15399  | 51929562 | 51929762 |
| 5 | 51845488 | 51945161 - | NR_027710    | Ppargc1a      | 42178  | 51902783 | 51902983 |
| 5 | 52765890 | 52862783 - | NM_001256059 | Ccdc149       | 65011  | 52797572 | 52797772 |
| 5 | 53034646 | 53060941 - | NM_172490    | Sepsecs       | -450   | 53061391 | 53061591 |
| 5 | 53034646 | 53060941 - | NM_172490    | Sepsecs       | 23033  | 53037708 | 53037908 |
| 5 | 53132813 | 53160584 + | NM_025951    | Pi4k2b        | 1335   | 53134148 | 53134348 |
| 5 | 53132813 | 53160584 + | NM_028744    | Pi4k2b        | 1335   | 53134148 | 53134348 |
| 5 | 53166648 | 53215905 + | NM_001309445 | Zcchc4        | 35604  | 53202252 | 53202452 |
| 5 | 53166648 | 53215905 + | NM_001309445 | Zcchc4        | 11425  | 53178073 | 53178273 |
| 5 | 53174294 | 53215905 + | NM_001308144 | Zcchc4        | 27958  | 53202252 | 53202452 |
| 5 | 53174294 | 53215905 + | NM_001308144 | Zcchc4        | 3779   | 53178073 | 53178273 |
| 5 | 53174294 | 53214812 + | NM_030185    | Zcchc4        | 27958  | 53202252 | 53202452 |
| 5 | 53174294 | 53214812 + | NM_030185    | Zcchc4        | 3779   | 53178073 | 53178273 |
| 5 | 53364251 | 53383532 - | NR_040413    | 5033403H07Rik | 1199   | 53382133 | 53382333 |
| 5 | 53364251 | 53383532 - | NR_040413    | 5033403H07Rik | -8005  | 53391537 | 53391737 |
| 5 | 53440592 | 53462903 + | NM_011402    | Slc34a2       | -6314  | 53434078 | 53434278 |
| 5 | 53440592 | 53462903 + | NM_011402    | Slc34a2       | -3873  | 53436519 | 53436719 |
| 5 | 53440592 | 53462903 + | NM_011402    | Slc34a2       | 18065  | 53458657 | 53458857 |
| 5 | 53440592 | 53462903 + | NM_011402    | Slc34a2       | -5152  | 53435240 | 53435440 |
| 5 | 53498322 | 53604692 - | NM_172710    | Sel1l3        | -4587  | 53609279 | 53609479 |
| 5 | 53498322 | 53604692 - | NM_172710    | Sel1l3        | 102970 | 53501522 | 53501722 |
| 5 | 53498322 | 53604692 - | NM_172710    | Sel1l3        | 24617  | 53579875 | 53580075 |
| 5 | 53658345 | 53669780 + | NM_001145433 | Smim20        | 318    | 53658663 | 53658863 |
| 5 | 54389762 | 54512297 + | NM_001081103 | Stim2         | 40004  | 54429766 | 54429966 |
| 5 | 54389762 | 54512297 + | NM_001081103 | Stim2         | 61573  | 54451335 | 54451535 |
| 5 | 62993685 | 63157417 - | NM_178407    | Arap2         | 21511  | 63135706 | 63135906 |
| 5 | 62993685 | 63157417 - | NM_178407    | Arap2         | 2859   | 63154358 | 63154558 |
| 5 | 62993685 | 63157417 - | NM_178407    | Arap2         | 22585  | 63134632 | 63134832 |

|   |          |            |              |               |        |          |          |
|---|----------|------------|--------------|---------------|--------|----------|----------|
| 5 | 64203734 | 64290859 + | NM_029554    | 0610040J01Rik | 24813  | 64228547 | 64228747 |
| 5 | 64203734 | 64290859 + | NM_029554    | 0610040J01Rik | 35595  | 64239329 | 64239529 |
| 5 | 64203734 | 64290859 + | NM_029554    | 0610040J01Rik | 64221  | 64267955 | 64268155 |
| 5 | 64203734 | 64290859 + | NM_029554    | 0610040J01Rik | 26785  | 64230519 | 64230719 |
| 5 | 64203734 | 64290859 + | NM_029554    | 0610040J01Rik | 4235   | 64207969 | 64208169 |
| 5 | 64203734 | 64290859 + | NM_029554    | 0610040J01Rik | 11322  | 64215056 | 64215256 |
| 5 | 64300137 | 64360137 - | NM_145923    | Rell1         | 53772  | 64306165 | 64306365 |
| 5 | 64300137 | 64360137 - | NM_145923    | Rell1         | 16547  | 64343390 | 64343590 |
| 5 | 64300137 | 64360137 - | NM_145923    | Rell1         | 35825  | 64324112 | 64324312 |
| 5 | 64484189 | 64519398 + | NM_025700    | Pgm1          | 3115   | 64487304 | 64487504 |
| 5 | 64551499 | 64742726 + | NM_001310611 | Tbc1d1        | 138102 | 64689601 | 64689801 |
| 5 | 64551499 | 64742726 + | NM_001310611 | Tbc1d1        | 154539 | 64706038 | 64706238 |
| 5 | 64551499 | 64742726 + | NM_001310611 | Tbc1d1        | 57595  | 64609094 | 64609294 |
| 5 | 64551499 | 64742726 + | NM_001310611 | Tbc1d1        | 83670  | 64635169 | 64635369 |
| 5 | 64551499 | 64742726 + | NM_001310611 | Tbc1d1        | 57145  | 64608644 | 64608844 |
| 5 | 64551499 | 64742726 + | NM_019636    | Tbc1d1        | 138102 | 64689601 | 64689801 |
| 5 | 64551499 | 64742726 + | NM_019636    | Tbc1d1        | 154539 | 64706038 | 64706238 |
| 5 | 64551499 | 64742726 + | NM_019636    | Tbc1d1        | 57595  | 64609094 | 64609294 |
| 5 | 64551499 | 64742726 + | NM_019636    | Tbc1d1        | 83670  | 64635169 | 64635369 |
| 5 | 64551499 | 64742726 + | NM_019636    | Tbc1d1        | 57145  | 64608644 | 64608844 |
| 5 | 64621596 | 64742726 + | NM_001289514 | Tbc1d1        | 68005  | 64689601 | 64689801 |
| 5 | 64621596 | 64742726 + | NM_001289514 | Tbc1d1        | 84442  | 64706038 | 64706238 |
| 5 | 64621596 | 64742726 + | NM_001289514 | Tbc1d1        | 13573  | 64635169 | 64635369 |
| 5 | 64868247 | 64875206 + | NR_045413    | C030018K13Rik | 6105   | 64874352 | 64874552 |
| 5 | 65194762 | 65221369 + | NM_008453    | Klf3          | 11087  | 65205849 | 65206049 |
| 5 | 65194762 | 65221369 + | NM_008453    | Klf3          | 8646   | 65203408 | 65203608 |
| 5 | 65804461 | 65827082 - | NM_009466    | Ugdh          | 2678   | 65824204 | 65824404 |
| 5 | 65804461 | 65827082 - | NM_009466    | Ugdh          | 11309  | 65815573 | 65815773 |
| 5 | 65839994 | 65884075 - | NM_133697    | Smim14        | 6823   | 65877052 | 65877252 |
| 5 | 65928484 | 65990229 + | NM_001310618 | Ube2k         | 10422  | 65938906 | 65939106 |

|   |          |            |              |               |        |          |          |
|---|----------|------------|--------------|---------------|--------|----------|----------|
| 5 | 65928484 | 65990229 + | NM_001310619 | Ube2k         | 10422  | 65938906 | 65939106 |
| 5 | 65928484 | 65990229 + | NM_016786    | Ube2k         | 10422  | 65938906 | 65939106 |
| 5 | 66379167 | 66395525 - | NR_027961    | 9130230L23Rik | 0      | 66395492 | 66395692 |
| 5 | 66407788 | 66543194 - | NM_001127382 | Rbm47         | 100043 | 66442951 | 66443151 |
| 5 | 66407788 | 66543194 - | NM_001127382 | Rbm47         | 46315  | 66496679 | 66496879 |
| 5 | 66407788 | 66543194 - | NM_001127382 | Rbm47         | 71335  | 66471659 | 66471859 |
| 5 | 66407788 | 66543194 - | NM_001127382 | Rbm47         | 107791 | 66435203 | 66435403 |
| 5 | 66407788 | 66543194 - | NM_001127382 | Rbm47         | 105395 | 66437599 | 66437799 |
| 5 | 66407788 | 66543194 - | NM_001127382 | Rbm47         | 109002 | 66433992 | 66434192 |
| 5 | 66407788 | 66542218 - | NM_001291226 | Rbm47         | 99067  | 66442951 | 66443151 |
| 5 | 66407788 | 66542218 - | NM_001291226 | Rbm47         | 45339  | 66496679 | 66496879 |
| 5 | 66407788 | 66542218 - | NM_001291226 | Rbm47         | 70359  | 66471659 | 66471859 |
| 5 | 66407788 | 66542218 - | NM_001291226 | Rbm47         | 106815 | 66435203 | 66435403 |
| 5 | 66407788 | 66542218 - | NM_001291226 | Rbm47         | 104419 | 66437599 | 66437799 |
| 5 | 66407788 | 66542218 - | NM_001291226 | Rbm47         | 108026 | 66433992 | 66434192 |
| 5 | 66407788 | 66489419 - | NM_139065    | Rbm47         | 46268  | 66442951 | 66443151 |
| 5 | 66407788 | 66489419 - | NM_139065    | Rbm47         | -7260  | 66496679 | 66496879 |
| 5 | 66407788 | 66489419 - | NM_139065    | Rbm47         | 17560  | 66471659 | 66471859 |
| 5 | 66407788 | 66489419 - | NM_139065    | Rbm47         | 54016  | 66435203 | 66435403 |
| 5 | 66407788 | 66489419 - | NM_139065    | Rbm47         | 51620  | 66437599 | 66437799 |
| 5 | 66407788 | 66489419 - | NM_139065    | Rbm47         | 55227  | 66433992 | 66434192 |
| 5 | 66407788 | 66542218 - | NM_178446    | Rbm47         | 99067  | 66442951 | 66443151 |
| 5 | 66407788 | 66542218 - | NM_178446    | Rbm47         | 45339  | 66496679 | 66496879 |
| 5 | 66407788 | 66542218 - | NM_178446    | Rbm47         | 70359  | 66471659 | 66471859 |
| 5 | 66407788 | 66542218 - | NM_178446    | Rbm47         | 106815 | 66435203 | 66435403 |
| 5 | 66407788 | 66542218 - | NM_178446    | Rbm47         | 104419 | 66437599 | 66437799 |
| 5 | 66407788 | 66542218 - | NM_178446    | Rbm47         | 108026 | 66433992 | 66434192 |
| 5 | 66557846 | 66582575 - | NR_040695    | 1700126H18Rik | -9749  | 66592324 | 66592524 |
| 5 | 67783386 | 67819039 - | NM_001164806 | Bend4         | 18330  | 67800509 | 67800709 |
| 5 | 68009378 | 68238671 - | NM_001038999 | Atp8a1        | 601    | 68237870 | 68238070 |



|   |          |            |              |        |       |          |          |
|---|----------|------------|--------------|--------|-------|----------|----------|
| 5 | 68009378 | 68238671 - | NM_001038999 | Atp8a1 | -7809 | 68246480 | 68246680 |
| 5 | 68009378 | 68238671 - | NM_001038999 | Atp8a1 | 82233 | 68156238 | 68156438 |
| 5 | 68009378 | 68238671 - | NM_001284345 | Atp8a1 | 601   | 68237870 | 68238070 |
| 5 | 68009378 | 68238671 - | NM_001284345 | Atp8a1 | -7809 | 68246480 | 68246680 |
| 5 | 68009378 | 68238671 - | NM_001284345 | Atp8a1 | 82233 | 68156238 | 68156438 |
| 5 | 68009378 | 68238671 - | NM_009727    | Atp8a1 | 601   | 68237870 | 68238070 |
| 5 | 68009378 | 68238671 - | NM_009727    | Atp8a1 | -7809 | 68246480 | 68246680 |
| 5 | 68009378 | 68238671 - | NM_009727    | Atp8a1 | 82233 | 68156238 | 68156438 |
| 5 | 68332908 | 68368310 + | NM_001256184 | Gm5108 | -9809 | 68322899 | 68323099 |
| 5 | 68332908 | 68368310 + | NM_001256184 | Gm5108 | -9330 | 68323378 | 68323578 |
| 5 | 68423074 | 68557638 + | NM_001018019 | Grxcr1 | 41942 | 68465016 | 68465216 |
| 5 | 72904543 | 72950885 - | NM_133921    | Nfxl1  | 968   | 72949717 | 72949917 |
| 5 | 72904543 | 72950885 - | NM_133921    | Nfxl1  | 26562 | 72924123 | 72924323 |
| 5 | 72994936 | 73033992 - | NM_007723    | Cnga1  | -6286 | 73040278 | 73040478 |
| 5 | 72994936 | 73033992 - | NM_007723    | Cnga1  | 2419  | 73031373 | 73031573 |
| 5 | 72994936 | 73033992 - | NM_007723    | Cnga1  | -3414 | 73037406 | 73037606 |
| 5 | 72994936 | 73033992 - | NM_007723    | Cnga1  | 38937 | 72994855 | 72995055 |
| 5 | 73039035 | 73062318 + | NM_001081205 | Nipal1 | 1243  | 73040278 | 73040478 |
| 5 | 73039035 | 73062318 + | NM_001081205 | Nipal1 | 13634 | 73052669 | 73052869 |
| 5 | 73039035 | 73062318 + | NM_001081205 | Nipal1 | 12423 | 73051458 | 73051658 |
| 5 | 73039035 | 73062318 + | NM_001081205 | Nipal1 | -7462 | 73031373 | 73031573 |
| 5 | 73039035 | 73062318 + | NM_001081205 | Nipal1 | -1429 | 73037406 | 73037606 |
| 5 | 73146957 | 73259688 - | NM_001113460 | Tec    | 1883  | 73257605 | 73257805 |
| 5 | 73146957 | 73259688 - | NM_001113460 | Tec    | 57083 | 73202405 | 73202605 |
| 5 | 73146957 | 73259688 - | NM_001113460 | Tec    | 16411 | 73243077 | 73243277 |
| 5 | 73146957 | 73259688 - | NM_001113460 | Tec    | 37077 | 73222411 | 73222611 |
| 5 | 73146957 | 73259688 - | NM_001113460 | Tec    | 84142 | 73175346 | 73175546 |
| 5 | 73146957 | 73259688 - | NM_001113461 | Tec    | 1883  | 73257605 | 73257805 |
| 5 | 73146957 | 73259688 - | NM_001113461 | Tec    | 57083 | 73202405 | 73202605 |
| 5 | 73146957 | 73259688 - | NM_001113461 | Tec    | 16411 | 73243077 | 73243277 |

|   |          |            |              |        |       |          |          |
|---|----------|------------|--------------|--------|-------|----------|----------|
| 5 | 73146957 | 73259688 - | NM_001113461 | Tec    | 37077 | 73222411 | 73222611 |
| 5 | 73146957 | 73259688 - | NM_001113461 | Tec    | 84142 | 73175346 | 73175546 |
| 5 | 73146957 | 73259688 - | NM_001113464 | Tec    | 1883  | 73257605 | 73257805 |
| 5 | 73146957 | 73259688 - | NM_001113464 | Tec    | 57083 | 73202405 | 73202605 |
| 5 | 73146957 | 73259688 - | NM_001113464 | Tec    | 16411 | 73243077 | 73243277 |
| 5 | 73146957 | 73259688 - | NM_001113464 | Tec    | 37077 | 73222411 | 73222611 |
| 5 | 73146957 | 73259688 - | NM_001113464 | Tec    | 84142 | 73175346 | 73175546 |
| 5 | 73146957 | 73259688 - | NM_013689    | Tec    | 1883  | 73257605 | 73257805 |
| 5 | 73146957 | 73259688 - | NM_013689    | Tec    | 57083 | 73202405 | 73202605 |
| 5 | 73146957 | 73259688 - | NM_013689    | Tec    | 16411 | 73243077 | 73243277 |
| 5 | 73146957 | 73259688 - | NM_013689    | Tec    | 37077 | 73222411 | 73222611 |
| 5 | 73146957 | 73259688 - | NM_013689    | Tec    | 84142 | 73175346 | 73175546 |
| 5 | 73305601 | 73370081 + | NM_001113423 | Slain2 | 8362  | 73313963 | 73314163 |
| 5 | 73305601 | 73370081 + | NM_153567    | Slain2 | 8362  | 73313963 | 73314163 |
| 5 | 73411430 | 73647858 - | NM_028194    | Fryl   | 74134 | 73573524 | 73573724 |
| 5 | 73411430 | 73647858 - | NM_028194    | Fryl   | 3545  | 73644113 | 73644313 |
| 5 | 73411430 | 73647858 - | NM_028194    | Fryl   | 64506 | 73583152 | 73583352 |
| 5 | 73411430 | 73647858 - | NM_028194    | Fryl   | 99468 | 73548190 | 73548390 |
| 5 | 73411430 | 73647858 - | NM_028194    | Fryl   | 87442 | 73560216 | 73560416 |
| 5 | 73797317 | 73844665 + | NM_181323    | Cwh43  | 323   | 73797640 | 73797840 |
| 5 | 73797317 | 73844665 + | NM_181323    | Cwh43  | 13148 | 73810465 | 73810665 |
| 5 | 73997881 | 74023661 - | NM_153568    | Lrrc66 | 6552  | 74016909 | 74017109 |
| 5 | 73997881 | 74023661 - | NM_153568    | Lrrc66 | 1913  | 74021548 | 74021748 |
| 5 | 73997881 | 74023661 - | NM_153568    | Lrrc66 | 9348  | 74014113 | 74014313 |
| 5 | 74396062 | 74464437 - | NM_177561    | Usp46  | 47301 | 74416936 | 74417136 |
| 5 | 74988472 | 75073898 - | NM_001159578 | LnX1   | 64127 | 75009571 | 75009771 |
| 5 | 74988472 | 75073898 - | NM_010727    | LnX1   | 64127 | 75009571 | 75009771 |
| 5 | 74993129 | 75098929 - | NM_001159577 | LnX1   | 89158 | 75009571 | 75009771 |
| 5 | 74993129 | 75073898 - | NM_001159579 | LnX1   | 64127 | 75009571 | 75009771 |
| 5 | 74993129 | 75073898 - | NM_001159580 | LnX1   | 64127 | 75009571 | 75009771 |

|   |          |            |              |               |        |          |          |
|---|----------|------------|--------------|---------------|--------|----------|----------|
| 5 | 75345219 | 75362394 + | NR_045866    | Gm6116        | -4779  | 75340240 | 75340440 |
| 5 | 75345219 | 75362394 + | NR_045866    | Gm6116        | -407   | 75344612 | 75344812 |
| 5 | 75506346 | 75543133 + | NR_045792    | Gm19583       | 33392  | 75539738 | 75539938 |
| 5 | 75548316 | 75594230 + | NM_011058    | Pdgfra        | -8378  | 75539738 | 75539938 |
| 5 | 76612905 | 76638270 + | NM_011626    | Tmem165       | 6800   | 76619705 | 76619905 |
| 5 | 76612905 | 76638270 + | NM_011626    | Tmem165       | 21530  | 76634435 | 76634635 |
| 5 | 77269624 | 77302580 + | NM_001163793 | C530008M17Rik | 12002  | 77281626 | 77281826 |
| 5 | 77342274 | 77380604 - | NM_172146    | Ppat          | 2020   | 77378384 | 77378584 |
| 5 | 77380436 | 77396532 + | NM_025939    | Paics         | -1852  | 77378384 | 77378584 |
| 5 | 81450618 | 82224756 + | NM_198702    | Adgrl3        | 569409 | 82020027 | 82020227 |
| 5 | 81450618 | 82224756 + | NM_198702    | Adgrl3        | 395770 | 81846388 | 81846588 |
| 5 | 81450618 | 82224756 + | NM_198702    | Adgrl3        | 454470 | 81905088 | 81905288 |
| 5 | 87318795 | 87335963 - | NM_153598    | Ugt2b34       | -4171  | 87340134 | 87340334 |
| 5 | 87318795 | 87335963 - | NM_153598    | Ugt2b34       | 3021   | 87332742 | 87332942 |
| 5 | 87318795 | 87335963 - | NM_153598    | Ugt2b34       | 74     | 87335689 | 87335889 |
| 5 | 87429885 | 87442300 + | NM_172881    | Ugt2b35       | 0      | 87429757 | 87429957 |
| 5 | 87494952 | 87521581 - | NM_001029867 | Ugt2b36       | -20    | 87521601 | 87521801 |
| 5 | 87753997 | 87766221 - | NM_028094    | Ugt2a3        | 0      | 87766076 | 87766276 |
| 5 | 87942364 | 87967221 - | NM_019878    | Sult1b1       | 5798   | 87961223 | 87961423 |
| 5 | 87942364 | 87967221 - | NM_019878    | Sult1b1       | 5306   | 87961715 | 87961915 |
| 5 | 87983675 | 87998032 - | NM_016771    | Sult1d1       | 6261   | 87991571 | 87991771 |
| 5 | 88994065 | 89080443 + | NM_001289774 | Rufy3         | 963    | 88995028 | 88995228 |
| 5 | 88994065 | 89071730 + | NM_001289775 | Rufy3         | 963    | 88995028 | 88995228 |
| 5 | 89149896 | 89187481 + | NM_026735    | Mob1b         | 3411   | 89153307 | 89153507 |
| 5 | 89316285 | 89668682 + | NM_001136260 | Slc4a4        | 98200  | 89414485 | 89414685 |
| 5 | 89316285 | 89668682 + | NM_001136260 | Slc4a4        | 267241 | 89583526 | 89583726 |
| 5 | 89316285 | 89668682 + | NM_001136260 | Slc4a4        | 331889 | 89648174 | 89648374 |
| 5 | 89316285 | 89668682 + | NM_001136260 | Slc4a4        | 184641 | 89500926 | 89501126 |
| 5 | 89316285 | 89668682 + | NM_001136260 | Slc4a4        | 207130 | 89523415 | 89523615 |
| 5 | 89316285 | 89668682 + | NM_001136260 | Slc4a4        | 113321 | 89429606 | 89429806 |

|   |          |            |              |         |        |          |          |
|---|----------|------------|--------------|---------|--------|----------|----------|
| 5 | 89316285 | 89668682 + | NM_001136260 | Slc4a4  | 2071   | 89318356 | 89318556 |
| 5 | 89316285 | 89668682 + | NM_001136260 | Slc4a4  | 85068  | 89401353 | 89401553 |
| 5 | 89316285 | 89668682 + | NM_001136260 | Slc4a4  | 70709  | 89386994 | 89387194 |
| 5 | 89316285 | 89668682 + | NM_001136260 | Slc4a4  | -2914  | 89313171 | 89313371 |
| 5 | 89316285 | 89668682 + | NM_001197147 | Slc4a4  | 98200  | 89414485 | 89414685 |
| 5 | 89316285 | 89668682 + | NM_001197147 | Slc4a4  | 267241 | 89583526 | 89583726 |
| 5 | 89316285 | 89668682 + | NM_001197147 | Slc4a4  | 331889 | 89648174 | 89648374 |
| 5 | 89316285 | 89668682 + | NM_001197147 | Slc4a4  | 184641 | 89500926 | 89501126 |
| 5 | 89316285 | 89668682 + | NM_001197147 | Slc4a4  | 207130 | 89523415 | 89523615 |
| 5 | 89316285 | 89668682 + | NM_001197147 | Slc4a4  | 113321 | 89429606 | 89429806 |
| 5 | 89316285 | 89668682 + | NM_001197147 | Slc4a4  | 2071   | 89318356 | 89318556 |
| 5 | 89316285 | 89668682 + | NM_001197147 | Slc4a4  | 85068  | 89401353 | 89401553 |
| 5 | 89316285 | 89668682 + | NM_001197147 | Slc4a4  | 70709  | 89386994 | 89387194 |
| 5 | 89316285 | 89668682 + | NM_001197147 | Slc4a4  | -2914  | 89313171 | 89313371 |
| 5 | 89316285 | 89668682 + | NM_018760    | Slc4a4  | 98200  | 89414485 | 89414685 |
| 5 | 89316285 | 89668682 + | NM_018760    | Slc4a4  | 267241 | 89583526 | 89583726 |
| 5 | 89316285 | 89668682 + | NM_018760    | Slc4a4  | 331889 | 89648174 | 89648374 |
| 5 | 89316285 | 89668682 + | NM_018760    | Slc4a4  | 184641 | 89500926 | 89501126 |
| 5 | 89316285 | 89668682 + | NM_018760    | Slc4a4  | 207130 | 89523415 | 89523615 |
| 5 | 89316285 | 89668682 + | NM_018760    | Slc4a4  | 113321 | 89429606 | 89429806 |
| 5 | 89316285 | 89668682 + | NM_018760    | Slc4a4  | 2071   | 89318356 | 89318556 |
| 5 | 89316285 | 89668682 + | NM_018760    | Slc4a4  | 85068  | 89401353 | 89401553 |
| 5 | 89316285 | 89668682 + | NM_018760    | Slc4a4  | 70709  | 89386994 | 89387194 |
| 5 | 89316285 | 89668682 + | NM_018760    | Slc4a4  | -2914  | 89313171 | 89313371 |
| 5 | 90102866 | 90312360 - | NM_001081401 | Adamts3 | 155303 | 90156857 | 90157057 |
| 5 | 90102866 | 90312360 - | NM_001081401 | Adamts3 | 134845 | 90177315 | 90177515 |
| 5 | 90102866 | 90312360 - | NM_177872    | Adamts3 | 155303 | 90156857 | 90157057 |
| 5 | 90102866 | 90312360 - | NM_177872    | Adamts3 | 134845 | 90177315 | 90177515 |
| 5 | 90656191 | 90795212 - | NM_030886    | Ankrd17 | 26448  | 90768564 | 90768764 |
| 5 | 90656191 | 90795212 - | NM_198010    | Ankrd17 | 26448  | 90768564 | 90768764 |

|   |          |            |              |         |       |          |          |
|---|----------|------------|--------------|---------|-------|----------|----------|
| 5 | 91032102 | 91069554 - | NM_001310656 | Rassf6  | 28164 | 91041190 | 91041390 |
| 5 | 91032102 | 91069554 - | NM_028478    | Rassf6  | 28164 | 91041190 | 91041390 |
| 5 | 91360222 | 91450396 + | NM_026788    | Mthfd2l | 20431 | 91380653 | 91380853 |
| 5 | 91568641 | 91577459 + | NM_009704    | Areg    | -4298 | 91564143 | 91564343 |
| 5 | 91686597 | 91712103 - | NR_040428    | Gm19619 | 3328  | 91708575 | 91708775 |
| 5 | 91946726 | 92053023 + | NM_145562    | Parm1   | 88902 | 92035628 | 92035828 |
| 5 | 92435100 | 92471723 - | NM_001276315 | Cdkl2   | 30574 | 92440949 | 92441149 |
| 5 | 92435100 | 92472069 - | NM_016912    | Cdkl2   | 30920 | 92440949 | 92441149 |
| 5 | 92435100 | 92472069 - | NM_177270    | Cdkl2   | 30920 | 92440949 | 92441149 |
| 5 | 92481171 | 92512625 - | NM_001080794 | G3bp2   | 24171 | 92488254 | 92488454 |
| 5 | 92481171 | 92512771 - | NM_001080795 | G3bp2   | 24317 | 92488254 | 92488454 |
| 5 | 92481171 | 92512625 - | NM_001080796 | G3bp2   | 24171 | 92488254 | 92488454 |
| 5 | 92481171 | 92511944 - | NM_001080797 | G3bp2   | 23490 | 92488254 | 92488454 |
| 5 | 92481171 | 92512771 - | NM_011816    | G3bp2   | 24317 | 92488254 | 92488454 |
| 5 | 92566964 | 92631822 + | NM_019490    | Uso1    | 51234 | 92618198 | 92618398 |
| 5 | 92638921 | 92644435 - | NR_033483    | U90926  | 4930  | 92639305 | 92639505 |
| 5 | 92656000 | 92682186 - | NM_011148    | Ppef2   | -5342 | 92687528 | 92687728 |
| 5 | 92686686 | 92707208 - | NM_001163687 | Naaa    | -9772 | 92716980 | 92717180 |
| 5 | 92686686 | 92707208 - | NM_001163687 | Naaa    | 19480 | 92687528 | 92687728 |
| 5 | 92686686 | 92707208 - | NM_001163687 | Naaa    | -5079 | 92712287 | 92712487 |
| 5 | 92686686 | 92707208 - | NM_025972    | Naaa    | -9772 | 92716980 | 92717180 |
| 5 | 92686686 | 92707208 - | NM_025972    | Naaa    | 19480 | 92687528 | 92687728 |
| 5 | 92686686 | 92707208 - | NM_025972    | Naaa    | -5079 | 92712287 | 92712487 |
| 5 | 92713036 | 92739051 - | NM_172713    | Sdad1   | -44   | 92739095 | 92739295 |
| 5 | 92713036 | 92739051 - | NM_172713    | Sdad1   | 21871 | 92716980 | 92717180 |
| 5 | 92713036 | 92739051 - | NM_172713    | Sdad1   | 17618 | 92721233 | 92721433 |
| 5 | 92713036 | 92739051 - | NM_172713    | Sdad1   | 16761 | 92722090 | 92722290 |
| 5 | 92713036 | 92739051 - | NM_172713    | Sdad1   | 18060 | 92720791 | 92720991 |
| 5 | 92750357 | 92757106 - | NM_008599    | Cxcl9   | -4176 | 92761282 | 92761482 |
| 5 | 92750357 | 92757106 - | NM_008599    | Cxcl9   | 475   | 92756431 | 92756631 |

|   |          |            |              |         |        |          |          |
|---|----------|------------|--------------|---------|--------|----------|----------|
| 5 | 92760853 | 92843654 + | NM_001310664 | Art3    | 429    | 92761282 | 92761482 |
| 5 | 92760853 | 92843654 + | NM_001310664 | Art3    | -4222  | 92756431 | 92756631 |
| 5 | 92844566 | 92864226 - | NM_183392    | Nup54   | 14424  | 92849602 | 92849802 |
| 5 | 93112461 | 93394786 + | NM_015756    | Shroom3 | 80243  | 93192704 | 93192904 |
| 5 | 93112461 | 93394786 + | NM_015756    | Shroom3 | 197286 | 93309747 | 93309947 |
| 5 | 93112461 | 93394786 + | NM_015756    | Shroom3 | 242423 | 93354884 | 93355084 |
| 5 | 93112461 | 93394786 + | NM_015756    | Shroom3 | 218591 | 93331052 | 93331252 |
| 5 | 93112461 | 93394786 + | NM_015756    | Shroom3 | 228411 | 93340872 | 93341072 |
| 5 | 93112461 | 93394786 + | NM_015756    | Shroom3 | 205306 | 93317767 | 93317967 |
| 5 | 93112461 | 93394786 + | NM_015756    | Shroom3 | 128832 | 93241293 | 93241493 |
| 5 | 93112461 | 93394786 + | NM_015756    | Shroom3 | 141035 | 93253496 | 93253696 |
| 5 | 93112461 | 93394786 + | NM_015756    | Shroom3 | 193699 | 93306160 | 93306360 |
| 5 | 93112461 | 93394786 + | NM_015756    | Shroom3 | 135062 | 93247523 | 93247723 |
| 5 | 93112461 | 93394786 + | NM_015756    | Shroom3 | 115935 | 93228396 | 93228596 |
| 5 | 93112461 | 93394786 + | NM_015756    | Shroom3 | 116960 | 93229421 | 93229621 |
| 5 | 93112461 | 93394786 + | NM_015756    | Shroom3 | 87272  | 93199733 | 93199933 |
| 5 | 93112461 | 93394786 + | NM_015756    | Shroom3 | 47683  | 93160144 | 93160344 |
| 5 | 93112461 | 93394786 + | NM_015756    | Shroom3 | 78328  | 93190789 | 93190989 |
| 5 | 93112461 | 93394786 + | NM_015756    | Shroom3 | 54768  | 93167229 | 93167429 |
| 5 | 93238408 | 93394786 + | NM_001077595 | Shroom3 | 71339  | 93309747 | 93309947 |
| 5 | 93238408 | 93394786 + | NM_001077595 | Shroom3 | 116476 | 93354884 | 93355084 |
| 5 | 93238408 | 93394786 + | NM_001077595 | Shroom3 | 92644  | 93331052 | 93331252 |
| 5 | 93238408 | 93394786 + | NM_001077595 | Shroom3 | 102464 | 93340872 | 93341072 |
| 5 | 93238408 | 93394786 + | NM_001077595 | Shroom3 | 79359  | 93317767 | 93317967 |
| 5 | 93238408 | 93394786 + | NM_001077595 | Shroom3 | 2885   | 93241293 | 93241493 |
| 5 | 93238408 | 93394786 + | NM_001077595 | Shroom3 | 15088  | 93253496 | 93253696 |
| 5 | 93238408 | 93394786 + | NM_001077595 | Shroom3 | 67752  | 93306160 | 93306360 |
| 5 | 93238408 | 93394786 + | NM_001077595 | Shroom3 | 9115   | 93247523 | 93247723 |
| 5 | 93238408 | 93394786 + | NM_001077595 | Shroom3 | -9812  | 93228396 | 93228596 |
| 5 | 93238408 | 93394786 + | NM_001077595 | Shroom3 | -8787  | 93229421 | 93229621 |

|   |          |             |              |               |        |           |           |
|---|----------|-------------|--------------|---------------|--------|-----------|-----------|
| 5 | 93327019 | 93394786 +  | NM_001077596 | Shroom3       | 27865  | 93354884  | 93355084  |
| 5 | 93327019 | 93394786 +  | NM_001077596 | Shroom3       | 4033   | 93331052  | 93331252  |
| 5 | 93327019 | 93394786 +  | NM_001077596 | Shroom3       | 13853  | 93340872  | 93341072  |
| 5 | 93327019 | 93394786 +  | NM_001077596 | Shroom3       | -9052  | 93317767  | 93317967  |
| 5 | 93522442 | 93604102 +  | NM_001009818 | Sept11        | -95    | 93522147  | 93522347  |
| 5 | 93522442 | 93610405 +  | NM_001310669 | Sept11        | -95    | 93522147  | 93522347  |
| 5 | 93522442 | 93610405 +  | NM_001310671 | Sept11        | -95    | 93522147  | 93522347  |
| 5 | 93696599 | 93705258 +  | NM_007635    | Ccng2         | -422   | 93695977  | 93696177  |
| 5 | 94064211 | 94100490 -  | NM_001164284 | C87414        | 7312   | 94092978  | 94093178  |
| 5 | 94064211 | 94100490 -  | NM_001164285 | C87414        | 7312   | 94092978  | 94093178  |
| 5 | 96639134 | 96668704 +  | NM_001039084 | Mrpl1         | -9477  | 96629457  | 96629657  |
| 5 | 96639134 | 96695747 +  | NM_053158    | Mrpl1         | -9477  | 96629457  | 96629657  |
| 5 | 96802974 | 97213748 +  | NM_175473    | Fras1         | 202052 | 97005026  | 97005226  |
| 5 | 96802974 | 97213748 +  | NM_175473    | Fras1         | 66945  | 96869919  | 96870119  |
| 5 | 96802974 | 97213748 +  | NM_175473    | Fras1         | 28639  | 96831613  | 96831813  |
| 5 | 97350291 | 97363887 +  | NR_131152    | Gm8013        | -1786  | 97348305  | 97348505  |
| 5 | 97426708 | 97520068 +  | NM_080708    | Bmp2k         | 24663  | 97451371  | 97451571  |
| 5 | 97426708 | 97520068 +  | NM_080708    | Bmp2k         | 8915   | 97435623  | 97435823  |
| 5 | 98313707 | 98459982 -  | NM_133738    | Antxr2        | 14303  | 98445479  | 98445679  |
| 5 | 98758323 | 99231039 +  | NM_001024614 | 1700007G11Rik | 117816 | 98876139  | 98876339  |
| 5 | 98758323 | 99231039 +  | NM_001024614 | 1700007G11Rik | 383784 | 99142107  | 99142307  |
| 5 | 98758323 | 99231039 +  | NM_001024614 | 1700007G11Rik | 388659 | 99146982  | 99147182  |
| 5 | 98758323 | 99231039 +  | NM_001024614 | 1700007G11Rik | 189190 | 98947513  | 98947713  |
| 5 | 99358792 | 99466099 -  | NM_008926    | Prkg2         | 85005  | 99380894  | 99381094  |
| 5 | 99358792 | 99466099 -  | NM_008926    | Prkg2         | 45151  | 99420748  | 99420948  |
| 5 | 99726263 | 100158080 - | NR_030692    | A930011G23Rik | 381926 | 99775954  | 99776154  |
| 5 | 99726263 | 100158080 - | NR_030692    | A930011G23Rik | 348848 | 99809032  | 99809232  |
| 5 | 99726263 | 100158080 - | NR_030692    | A930011G23Rik | 95732  | 100062148 | 100062348 |
| 5 | 99726263 | 100158080 - | NR_030692    | A930011G23Rik | 380369 | 99777511  | 99777711  |
| 5 | 99726263 | 100158080 - | NR_030692    | A930011G23Rik | 401770 | 99756110  | 99756310  |

|   |           |             |              |               |        |           |           |
|---|-----------|-------------|--------------|---------------|--------|-----------|-----------|
| 5 | 100506981 | 100524293 + | NR_045993    | Tmem150cos    | -3546  | 100503235 | 100503435 |
| 5 | 100790668 | 100845254 - | NM_026969    | Sec31a        | 1268   | 100843786 | 100843986 |
| 5 | 100790668 | 100845254 - | NM_026969    | Sec31a        | -662   | 100845916 | 100846116 |
| 5 | 100790668 | 100845254 - | NM_026969    | Sec31a        | 35801  | 100809253 | 100809453 |
| 5 | 100849861 | 100858555 - | NR_034038    | 5430416N02Rik | -1575  | 100860130 | 100860330 |
| 5 | 100871058 | 100927593 - | NM_001115010 | Lin54         | 11918  | 100915475 | 100915675 |
| 5 | 100871058 | 100929659 - | NM_172714    | Lin54         | 13984  | 100915475 | 100915675 |
| 5 | 100947328 | 100976822 + | NM_012001    | Cops4         | -4168  | 100942960 | 100943160 |
| 5 | 100947328 | 100976822 + | NM_012001    | Cops4         | -92    | 100947036 | 100947236 |
| 5 | 100982752 | 101001225 - | NM_139198    | Plac8         | 6549   | 100994476 | 100994676 |
| 5 | 100982752 | 101001225 - | NM_139198    | Plac8         | -5235  | 101006460 | 101006660 |
| 5 | 100982752 | 101001225 - | NM_139198    | Plac8         | 3746   | 100997279 | 100997479 |
| 5 | 101275248 | 101328122 + | NM_172715    | Agpat9        | 15059  | 101290307 | 101290507 |
| 5 | 101275248 | 101328122 + | NM_172715    | Agpat9        | 25698  | 101300946 | 101301146 |
| 5 | 101275248 | 101328122 + | NM_172715    | Agpat9        | 29084  | 101304332 | 101304532 |
| 5 | 101275248 | 101328122 + | NM_172715    | Agpat9        | 18661  | 101293909 | 101294109 |
| 5 | 101275248 | 101328122 + | NM_172715    | Agpat9        | 604    | 101275852 | 101276052 |
| 5 | 102194149 | 102252872 + | NM_173370    | Cds1          | 37847  | 102231996 | 102232196 |
| 5 | 102194149 | 102252872 + | NM_173370    | Cds1          | 2071   | 102196220 | 102196420 |
| 5 | 102910410 | 103326957 + | NM_029270    | Arhgap24      | 393234 | 103303644 | 103303844 |
| 5 | 102910410 | 103326957 + | NM_146161    | Arhgap24      | 393234 | 103303644 | 103303844 |
| 5 | 103197829 | 103326957 + | NM_001286468 | Arhgap24      | 105815 | 103303644 | 103303844 |
| 5 | 103659394 | 103728049 - | NR_040699    | 4930429D17Rik | 33598  | 103694251 | 103694451 |
| 5 | 103854211 | 104027381 + | NM_011204    | Ptpn13        | 83130  | 103937341 | 103937541 |
| 5 | 104183181 | 104284342 + | NM_133919    | Aff1          | 20870  | 104204051 | 104204251 |
| 5 | 104183181 | 104284342 + | NM_133919    | Aff1          | 60105  | 104243286 | 104243486 |
| 5 | 104183181 | 104284342 + | NM_133919    | Aff1          | 16388  | 104199569 | 104199769 |
| 5 | 104183592 | 104284342 + | NM_001080798 | Aff1          | 20459  | 104204051 | 104204251 |
| 5 | 104183592 | 104284342 + | NM_001080798 | Aff1          | 59694  | 104243286 | 104243486 |
| 5 | 104183592 | 104284342 + | NM_001080798 | Aff1          | 15977  | 104199569 | 104199769 |



|   |           |             |              |          |       |           |           |
|---|-----------|-------------|--------------|----------|-------|-----------|-----------|
| 5 | 104291069 | 104340249 - | NM_178741    | Klhl8    | 47222 | 104292827 | 104293027 |
| 5 | 104384461 | 104406408 - | NM_198030    | Hsd17b13 | -111  | 104406519 | 104406719 |
| 5 | 104392484 | 104406408 - | NM_001163486 | Hsd17b13 | -111  | 104406519 | 104406719 |
| 5 | 104418784 | 104450816 - | NM_053262    | Hsd17b11 | 26215 | 104424401 | 104424601 |
| 5 | 104418784 | 104450816 - | NM_053262    | Hsd17b11 | -103  | 104450919 | 104451119 |
| 5 | 104475883 | 104494398 + | NM_028794    | Nudt9    | -7478 | 104468205 | 104468405 |
| 5 | 104477022 | 104477083 + | NR_049192    | Mir5619  | -8617 | 104468205 | 104468405 |
| 5 | 104499080 | 104506628 - | NM_001163772 | Gm17660  | 2848  | 104503580 | 104503780 |
| 5 | 105699721 | 105722719 - | NM_194336    | Gbp6     | -7686 | 105730405 | 105730605 |
| 5 | 106128988 | 106244235 + | NM_001122768 | Lrrc8d   | -274  | 106128514 | 106128714 |
| 5 | 106128988 | 106244235 + | NM_001122768 | Lrrc8d   | 92018 | 106221006 | 106221206 |
| 5 | 106128988 | 106244235 + | NM_001122768 | Lrrc8d   | 2639  | 106131627 | 106131827 |
| 5 | 106128988 | 106244235 + | NM_001122768 | Lrrc8d   | 58105 | 106187093 | 106187293 |
| 5 | 106128988 | 106244235 + | NM_001122768 | Lrrc8d   | 934   | 106129922 | 106130122 |
| 5 | 106129829 | 106244229 + | NM_178701    | Lrrc8d   | -1115 | 106128514 | 106128714 |
| 5 | 106129829 | 106244229 + | NM_178701    | Lrrc8d   | 91177 | 106221006 | 106221206 |
| 5 | 106129829 | 106244229 + | NM_178701    | Lrrc8d   | 1798  | 106131627 | 106131827 |
| 5 | 106129829 | 106244229 + | NM_178701    | Lrrc8d   | 57264 | 106187093 | 106187293 |
| 5 | 106129829 | 106244229 + | NM_178701    | Lrrc8d   | 93    | 106129922 | 106130122 |
| 5 | 107535589 | 107718615 - | NM_011578    | Tgfbr3   | 16713 | 107701702 | 107701902 |
| 5 | 107535589 | 107718615 - | NM_011578    | Tgfbr3   | -5694 | 107724309 | 107724509 |
| 5 | 107867016 | 107920616 + | NM_001255991 | Btbd8    | 10070 | 107877086 | 107877286 |
| 5 | 108337061 | 108416097 - | NM_026062    | Fam69a   | 8558  | 108407339 | 108407539 |
| 5 | 108337061 | 108416097 - | NM_026062    | Fam69a   | 13946 | 108401951 | 108402151 |
| 5 | 108697916 | 108709541 + | NM_026106    | Dr1      | 7846  | 108705762 | 108705962 |
| 5 | 108697916 | 108709541 + | NM_026106    | Dr1      | -1616 | 108696100 | 108696300 |
| 5 | 108817392 | 108860762 + | NM_008806    | Pde6b    | 33848 | 108851240 | 108851440 |
| 5 | 108870073 | 108877911 - | NM_172883    | Mfsd7a   | -9339 | 108887250 | 108887450 |
| 5 | 108890351 | 108932119 + | NM_172716    | Pcgf3    | -2901 | 108887250 | 108887450 |
| 5 | 109076063 | 109089789 - | NM_199011    | Dgkq     | 1304  | 109088285 | 109088485 |

|   |           |             |              |         |       |           |           |
|---|-----------|-------------|--------------|---------|-------|-----------|-----------|
| 5 | 109076063 | 109089789 - | NM_199011    | Dgkq    | 8653  | 109080936 | 109081136 |
| 5 | 109089350 | 109114466 + | NM_008325    | Idua    | -865  | 109088285 | 109088485 |
| 5 | 109089350 | 109114466 + | NM_008325    | Idua    | -8214 | 109080936 | 109081136 |
| 5 | 109089350 | 109114466 + | NM_172997    | Idua    | -865  | 109088285 | 109088485 |
| 5 | 109089350 | 109114466 + | NM_172997    | Idua    | -8214 | 109080936 | 109081136 |
| 5 | 110362582 | 110370730 + | NR_040366    | Gm15446 | -7115 | 110355267 | 110355467 |
| 5 | 110528988 | 110534972 + | NM_207279    | Plcx1   | -5228 | 110523560 | 110523760 |
| 5 | 110529578 | 110534972 + | NM_001281812 | Plcx1   | -5818 | 110523560 | 110523760 |
| 5 | 110564849 | 110600993 + | NM_001289577 | Chfr    | 32531 | 110597380 | 110597580 |
| 5 | 110564849 | 110600993 + | NM_001289578 | Chfr    | 32531 | 110597380 | 110597580 |
| 5 | 110564849 | 110600993 + | NM_001289579 | Chfr    | 32531 | 110597380 | 110597580 |
| 5 | 110564849 | 110600993 + | NM_001289580 | Chfr    | 32531 | 110597380 | 110597580 |
| 5 | 110564849 | 110600993 + | NM_172717    | Chfr    | 32531 | 110597380 | 110597580 |
| 5 | 110596527 | 110605524 - | NR_040430    | Gm15787 | 7944  | 110597380 | 110597580 |
| 5 | 110596527 | 110605524 - | NR_040431    | Gm15787 | 7944  | 110597380 | 110597580 |
| 5 | 110605720 | 110652175 + | NM_008146    | Golga3  | -8140 | 110597380 | 110597580 |
| 5 | 110703305 | 110715188 - | NM_008993    | Pxmp2   | 1265  | 110713723 | 110713923 |
| 5 | 110715338 | 110766473 + | NM_011132    | Pole    | -1415 | 110713723 | 110713923 |
| 5 | 111258089 | 111268797 - | NM_153571    | Hscb    | -5    | 111268802 | 111269002 |
| 5 | 111269036 | 111303153 + | NM_016681    | Chek2   | -34   | 111268802 | 111269002 |
| 5 | 111308822 | 111718800 + | NM_001267622 | Ttc28   | -189  | 111308433 | 111308633 |
| 5 | 112755389 | 112767094 + | NM_018783    | Tfip11  | -1565 | 112753624 | 112753824 |
| 5 | 112848171 | 113006219 - | NM_001253916 | Sez6l   | 77748 | 112928271 | 112928471 |
| 5 | 112848171 | 113006219 - | NM_001253917 | Sez6l   | 77748 | 112928271 | 112928471 |
| 5 | 112848171 | 113006219 - | NM_019982    | Sez6l   | 77748 | 112928271 | 112928471 |
| 5 | 113117896 | 113325383 - | NM_028901    | Myo18b  | 46477 | 113278706 | 113278906 |
| 5 | 113339498 | 113444559 - | NM_001285806 | Adrbk2  | 77121 | 113367238 | 113367438 |
| 5 | 113339498 | 113444559 - | NM_177078    | Adrbk2  | 77121 | 113367238 | 113367438 |
| 5 | 113487278 | 113499138 - | NM_007773    | Crybb2  | -5996 | 113505134 | 113505334 |
| 5 | 113504859 | 113510605 - | NM_001159650 | Crybb3  | 5271  | 113505134 | 113505334 |

|   |           |             |              |               |       |           |           |
|---|-----------|-------------|--------------|---------------|-------|-----------|-----------|
| 5 | 113504859 | 113510605 - | NM_021352    | Crybb3        | 5271  | 113505134 | 113505334 |
| 5 | 113515343 | 113592334 - | NM_172884    | 2900026A02Rik | -6980 | 113599314 | 113599514 |
| 5 | 113515343 | 113592334 - | NM_172884    | 2900026A02Rik | 24054 | 113568080 | 113568280 |
| 5 | 113655929 | 113668284 + | NM_001033428 | Tmem211       | -7011 | 113648718 | 113648918 |
| 5 | 113753513 | 113753566 - | NR_106088    | Mir7229       | -8316 | 113761882 | 113762082 |
| 5 | 113919467 | 114039680 + | NM_177292    | Wscd2         | 71088 | 113990555 | 113990755 |
| 5 | 114267807 | 114280511 - | NM_009151    | Selplg        | -19   | 114280530 | 114280730 |
| 5 | 114292448 | 114358716 - | NM_011779    | Coro1c        | 29927 | 114328589 | 114328789 |
| 5 | 114392228 | 114443767 - | NM_198109    | Ssh1          | 19751 | 114423816 | 114424016 |
| 5 | 114392228 | 114443767 - | NM_198109    | Ssh1          | 20341 | 114423226 | 114423426 |
| 5 | 114453744 | 114475685 + | NM_010018    | Dao           | 9200  | 114462944 | 114463144 |
| 5 | 114453893 | 114475685 + | NM_001286397 | Dao           | 9051  | 114462944 | 114463144 |
| 5 | 114454817 | 114475685 + | NM_001286396 | Dao           | 8127  | 114462944 | 114463144 |
| 5 | 114476922 | 114541390 - | NM_026805    | Svop          | -192  | 114541582 | 114541782 |
| 5 | 114476922 | 114541390 - | NM_026805    | Svop          | 51339 | 114489851 | 114490051 |
| 5 | 114476922 | 114541390 - | NM_026805    | Svop          | 49686 | 114491504 | 114491704 |
| 5 | 114550342 | 114572934 + | NM_001033202 | Usp30         | -8560 | 114541582 | 114541782 |
| 5 | 114615527 | 114700768 + | NM_133904    | Acacb         | 7534  | 114623061 | 114623261 |
| 5 | 114764950 | 114814586 + | NM_001164573 | Myo1h         | 8056  | 114773006 | 114773206 |
| 5 | 115018260 | 115063228 + | NM_001004180 | Fam222a       | 22945 | 115041205 | 115041405 |
| 5 | 115018260 | 115063228 + | NM_001004180 | Fam222a       | 20926 | 115039186 | 115039386 |
| 5 | 115119511 | 115140945 - | NM_019821    | Gltf          | -9791 | 115150736 | 115150936 |
| 5 | 115157788 | 115172337 + | NM_029992    | Tchp          | -6852 | 115150736 | 115150936 |
| 5 | 115223742 | 115224993 - | NR_027872    | 4930515G01Rik | -9699 | 115234692 | 115234892 |
| 5 | 115225149 | 115255830 + | NM_026718    | Ankrd13a      | 9543  | 115234692 | 115234892 |
| 5 | 115373249 | 115387921 + | NM_145209    | Oasl1         | -654  | 115372395 | 115372595 |
| 5 | 115398989 | 115421072 - | NM_009327    | Hnf1a         | 5520  | 115415352 | 115415552 |
| 5 | 115398989 | 115421072 - | NM_009327    | Hnf1a         | -6953 | 115428025 | 115428225 |
| 5 | 115461533 | 115548800 + | NM_029012    | Sppl3         | 46070 | 115507603 | 115507803 |
| 5 | 115461533 | 115548800 + | NM_029012    | Sppl3         | 63235 | 115524768 | 115524968 |

|   |           |             |              |         |       |           |           |
|---|-----------|-------------|--------------|---------|-------|-----------|-----------|
| 5 | 115461533 | 115548800 + | NM_029012    | Sppl3   | 78343 | 115539876 | 115540076 |
| 5 | 115461533 | 115548800 + | NM_029012    | Sppl3   | 57721 | 115519254 | 115519454 |
| 5 | 115461533 | 115548800 + | NM_029012    | Sppl3   | 3101  | 115464634 | 115464834 |
| 5 | 115461533 | 115548800 + | NM_029012    | Sppl3   | 21280 | 115482813 | 115483013 |
| 5 | 115592990 | 115608186 - | NM_175403    | Mlec    | 2466  | 115605520 | 115605720 |
| 5 | 115592990 | 115608186 - | NM_175403    | Mlec    | 1725  | 115606261 | 115606461 |
| 5 | 115592990 | 115608186 - | NM_175403    | Mlec    | 2142  | 115605844 | 115606044 |
| 5 | 115691779 | 115722905 - | NM_001302448 | Rnf10   | 9745  | 115712960 | 115713160 |
| 5 | 115691779 | 115722905 - | NM_001302448 | Rnf10   | -5357 | 115728262 | 115728462 |
| 5 | 115691779 | 115722905 - | NM_001302449 | Rnf10   | 9745  | 115712960 | 115713160 |
| 5 | 115691779 | 115722905 - | NM_001302449 | Rnf10   | -5357 | 115728262 | 115728462 |
| 5 | 115691779 | 115722905 - | NM_016698    | Rnf10   | 9745  | 115712960 | 115713160 |
| 5 | 115691779 | 115722905 - | NM_016698    | Rnf10   | -5357 | 115728262 | 115728462 |
| 5 | 115729711 | 115746982 + | NM_026504    | Coq5    | -1249 | 115728262 | 115728462 |
| 5 | 115751129 | 115770092 + | NR_131932    | Gm13830 | 18633 | 115769762 | 115769962 |
| 5 | 115777186 | 115783090 + | NM_025573    | Srsf9   | -7224 | 115769762 | 115769962 |
| 5 | 115777186 | 115783090 + | NM_025573    | Srsf9   | -6558 | 115770428 | 115770628 |
| 5 | 115777186 | 115783090 + | NR_036616    | Srsf9   | -7224 | 115769762 | 115769962 |
| 5 | 115777186 | 115783090 + | NR_036616    | Srsf9   | -6558 | 115770428 | 115770628 |
| 5 | 115783251 | 115791171 - | NM_029645    | Gatc    | -4186 | 115795357 | 115795557 |
| 5 | 115783251 | 115791171 - | NM_029645    | Gatc    | -8118 | 115799289 | 115799489 |
| 5 | 115795663 | 115798965 - | NM_007748    | Cox6a1  | -324  | 115799289 | 115799489 |
| 5 | 115916275 | 115924727 + | NM_011107    | Pla2g1b | 8393  | 115924668 | 115924868 |
| 5 | 115956685 | 116005997 + | NM_011223    | Pxn     | 25357 | 115982042 | 115982242 |
| 5 | 115956685 | 116005997 + | NM_011223    | Pxn     | 36631 | 115993316 | 115993516 |
| 5 | 115956685 | 116005997 + | NM_011223    | Pxn     | 16525 | 115973210 | 115973410 |
| 5 | 115956685 | 116005997 + | NM_133915    | Pxn     | 25357 | 115982042 | 115982242 |
| 5 | 115956685 | 116005997 + | NM_133915    | Pxn     | 36631 | 115993316 | 115993516 |
| 5 | 115956685 | 116005997 + | NM_133915    | Pxn     | 16525 | 115973210 | 115973410 |
| 5 | 116490543 | 116533256 - | NM_001101546 | Tmem233 | 6299  | 116526757 | 116526957 |

|   |           |             |              |          |        |           |           |
|---|-----------|-------------|--------------|----------|--------|-----------|-----------|
| 5 | 117769275 | 117805016 + | NM_001033311 | Vsig10   | 7250   | 117776525 | 117776725 |
| 5 | 117807314 | 117828599 + | NM_021539    | Wsb2     | 3936   | 117811250 | 117811450 |
| 5 | 119010728 | 119215447 + | NM_172424    | Med13l   | 130678 | 119141406 | 119141606 |
| 5 | 119010728 | 119215447 + | NM_172424    | Med13l   | 790    | 119011518 | 119011718 |
| 5 | 120020138 | 120030368 - | NR_045702    | AW549542 | -100   | 120030468 | 120030668 |
| 5 | 120020138 | 120030368 - | NR_045702    | AW549542 | -8021  | 120038389 | 120038589 |
| 5 | 120020138 | 120030368 - | NR_045702    | AW549542 | 2111   | 120028057 | 120028257 |
| 5 | 120075951 | 120084472 + | NR_046178    | Gm16063  | -2579  | 120073172 | 120073372 |
| 5 | 120120871 | 120134734 + | NM_198052    | Tbx3     | 5707   | 120126578 | 120126778 |
| 5 | 120120871 | 120134734 + | NM_198052    | Tbx3     | -989   | 120119682 | 120119882 |
| 5 | 120121242 | 120134734 + | NM_011535    | Tbx3     | 5336   | 120126578 | 120126778 |
| 5 | 120121242 | 120134734 + | NM_011535    | Tbx3     | -1360  | 120119682 | 120119882 |
| 5 | 120881895 | 120891467 + | NM_008499    | Lhx5     | -7717  | 120873978 | 120874178 |
| 5 | 120881895 | 120891467 + | NM_008499    | Lhx5     | 7291   | 120889186 | 120889386 |
| 5 | 120908211 | 120922773 - | NM_133902    | Sdsl     | 6604   | 120915969 | 120916169 |
| 5 | 120908211 | 120922773 - | NM_133902    | Sdsl     | 6187   | 120916386 | 120916586 |
| 5 | 120926556 | 120933915 + | NM_145565    | Sds      | -9970  | 120916386 | 120916586 |
| 5 | 121098821 | 121129620 + | NM_013832    | Rasal1   | 2520   | 121101341 | 121101541 |
| 5 | 121099197 | 121129620 + | NM_001281999 | Rasal1   | 2144   | 121101341 | 121101541 |
| 5 | 121580542 | 121641407 - | NM_001109992 | Ptpn11   | -1315  | 121642722 | 121642922 |
| 5 | 121580542 | 121641407 - | NM_011202    | Ptpn11   | -1315  | 121642722 | 121642922 |
| 5 | 121670228 | 121818587 + | NM_181421    | Gm15800  | 16058  | 121686286 | 121686486 |
| 5 | 121670228 | 121818587 + | NM_181421    | Gm15800  | 22623  | 121692851 | 121693051 |
| 5 | 121670228 | 121818587 + | NM_181421    | Gm15800  | 6104   | 121676332 | 121676532 |
| 5 | 121670228 | 121818587 + | NM_181421    | Gm15800  | 13782  | 121684010 | 121684210 |
| 5 | 121847991 | 121890123 + | NM_172722    | Naa25    | 1844   | 121849835 | 121850035 |
| 5 | 122048290 | 122068948 - | NM_178799    | Acad12   | 13536  | 122055212 | 122055412 |
| 5 | 122558061 | 122584903 - | NM_001289809 | Ccdc63   | -1944  | 122586847 | 122587047 |
| 5 | 122558061 | 122584903 - | NM_001289811 | Ccdc63   | -1944  | 122586847 | 122587047 |
| 5 | 122558061 | 122588072 - | NM_183307    | Ccdc63   | 1025   | 122586847 | 122587047 |

|   |           |             |              |         |       |           |           |
|---|-----------|-------------|--------------|---------|-------|-----------|-----------|
| 5 | 122734407 | 122774291 + | NM_177242    | Pptc7   | -2053 | 122732154 | 122732354 |
| 5 | 122734407 | 122774291 + | NM_177242    | Pptc7   | 18966 | 122753373 | 122753573 |
| 5 | 122734407 | 122774291 + | NM_177242    | Pptc7   | -4450 | 122729757 | 122729957 |
| 5 | 122814593 | 122821973 - | NM_026883    | Fam216a | -258  | 122822231 | 122822431 |
| 5 | 122822517 | 122832779 + | NM_024216    | Gpn3    | -86   | 122822231 | 122822431 |
| 5 | 122903522 | 122952235 - | NM_009722    | Atp2a2  | 1658  | 122950377 | 122950577 |
| 5 | 122903522 | 122952235 - | NM_009722    | Atp2a2  | 8887  | 122943148 | 122943348 |
| 5 | 122903522 | 122952235 - | NR_027838    | Atp2a2  | 1658  | 122950377 | 122950577 |
| 5 | 122903522 | 122952235 - | NR_027838    | Atp2a2  | 8887  | 122943148 | 122943348 |
| 5 | 122906333 | 122952235 - | NM_001110140 | Atp2a2  | 1658  | 122950377 | 122950577 |
| 5 | 122906333 | 122952235 - | NM_001110140 | Atp2a2  | 8887  | 122943148 | 122943348 |
| 5 | 123093920 | 123134299 + | NM_001038839 | P2rx7   | 8517  | 123102437 | 123102637 |
| 5 | 123093920 | 123141442 + | NM_001038845 | P2rx7   | 46611 | 123140531 | 123140731 |
| 5 | 123093920 | 123141442 + | NM_001038845 | P2rx7   | 8517  | 123102437 | 123102637 |
| 5 | 123093920 | 123105270 + | NM_001038887 | P2rx7   | 8517  | 123102437 | 123102637 |
| 5 | 123093920 | 123134299 + | NM_011027    | P2rx7   | 8517  | 123102437 | 123102637 |
| 5 | 123100433 | 123134299 + | NM_001284402 | P2rx7   | 2004  | 123102437 | 123102637 |
| 5 | 123181180 | 123229420 - | NM_001199676 | Camkk2  | 4077  | 123225143 | 123225343 |
| 5 | 123181180 | 123229420 - | NM_145358    | Camkk2  | 4077  | 123225143 | 123225343 |
| 5 | 123237470 | 123271352 - | NM_001042491 | Anapc5  | 22429 | 123248723 | 123248923 |
| 5 | 123237470 | 123271352 - | NM_001289517 | Anapc5  | 22429 | 123248723 | 123248923 |
| 5 | 123237470 | 123271352 - | NM_001289518 | Anapc5  | 22429 | 123248723 | 123248923 |
| 5 | 123237470 | 123271352 - | NM_001289519 | Anapc5  | 22429 | 123248723 | 123248923 |
| 5 | 123237470 | 123271352 - | NM_001289520 | Anapc5  | 22429 | 123248723 | 123248923 |
| 5 | 123237470 | 123271352 - | NM_021505    | Anapc5  | 22429 | 123248723 | 123248923 |
| 5 | 123320681 | 123439109 - | NM_001003953 | Kdm2b   | 22381 | 123416528 | 123416728 |
| 5 | 123568189 | 123582639 - | NM_175092    | Rhof    | -2418 | 123585057 | 123585257 |
| 5 | 123568189 | 123582639 - | NM_175092    | Rhof    | -3982 | 123586621 | 123586821 |
| 5 | 123568189 | 123582639 - | NM_175092    | Rhof    | -3062 | 123585701 | 123585901 |
| 5 | 123568189 | 123582639 - | NM_175092    | Rhof    | -200  | 123582839 | 123583039 |

|   |           |             |              |          |       |           |           |
|---|-----------|-------------|--------------|----------|-------|-----------|-----------|
| 5 | 123592202 | 123618640 + | NM_001040398 | Setd1b   | -6945 | 123585057 | 123585257 |
| 5 | 123592202 | 123618640 + | NM_001040398 | Setd1b   | -5381 | 123586621 | 123586821 |
| 5 | 123592202 | 123618640 + | NM_001040398 | Setd1b   | 2512  | 123594714 | 123594914 |
| 5 | 123592202 | 123618640 + | NM_001040398 | Setd1b   | -6301 | 123585701 | 123585901 |
| 5 | 123592202 | 123618640 + | NM_001040398 | Setd1b   | -9163 | 123582839 | 123583039 |
| 5 | 123844807 | 123907941 + | NM_133917    | Mlxip    | 21403 | 123866210 | 123866410 |
| 5 | 123844807 | 123907941 + | NM_133917    | Mlxip    | 880   | 123845687 | 123845887 |
| 5 | 123844807 | 123896902 + | NM_177582    | Mlxip    | 21403 | 123866210 | 123866410 |
| 5 | 123844807 | 123896902 + | NM_177582    | Mlxip    | 880   | 123845687 | 123845887 |
| 5 | 124027803 | 124134371 - | NM_001291229 | Clip1    | 13573 | 124120598 | 124120798 |
| 5 | 124027803 | 124134371 - | NM_019765    | Clip1    | 13573 | 124120598 | 124120798 |
| 5 | 124148311 | 124171054 - | NM_027494    | Zcchc8   | 21707 | 124149147 | 124149347 |
| 5 | 124178435 | 124199424 - | NM_001005525 | Rsrc2    | 0     | 124199401 | 124199601 |
| 5 | 124199735 | 124271603 + | NM_001042421 | Kntc1    | -134  | 124199401 | 124199601 |
| 5 | 124313579 | 124315526 - | NM_030701    | Hcar2    | 2372  | 124312954 | 124313154 |
| 5 | 124511866 | 124545808 - | NM_019875    | Abcb9    | 3624  | 124541984 | 124542184 |
| 5 | 124818711 | 124875924 - | NM_001081203 | Sbno1    | -6799 | 124882723 | 124882923 |
| 5 | 124889939 | 124912321 + | NM_001310725 | Setd8    | 2782  | 124892721 | 124892921 |
| 5 | 124889939 | 124912321 + | NM_001310725 | Setd8    | 11092 | 124901031 | 124901231 |
| 5 | 124889939 | 124912321 + | NM_001310725 | Setd8    | -7016 | 124882723 | 124882923 |
| 5 | 124889939 | 124912321 + | NM_030241    | Setd8    | 2782  | 124892721 | 124892921 |
| 5 | 124889939 | 124912321 + | NM_030241    | Setd8    | 11092 | 124901031 | 124901231 |
| 5 | 124889939 | 124912321 + | NM_030241    | Setd8    | -7016 | 124882723 | 124882923 |
| 5 | 124895508 | 124912321 + | NM_001310723 | Setd8    | -2587 | 124892721 | 124892921 |
| 5 | 124895508 | 124912321 + | NM_001310723 | Setd8    | 5523  | 124901031 | 124901231 |
| 5 | 124896713 | 124912321 + | NM_001310727 | Setd8    | -3792 | 124892721 | 124892921 |
| 5 | 124896713 | 124912321 + | NM_001310727 | Setd8    | 4318  | 124901031 | 124901231 |
| 5 | 125079633 | 125204826 + | NM_011596    | Atp6v0a2 | 2863  | 125082496 | 125082696 |
| 5 | 125497523 | 125659585 - | NM_001253904 | Ncor2    | 15177 | 125644208 | 125644408 |
| 5 | 125497523 | 125659585 - | NM_001253905 | Ncor2    | 15177 | 125644208 | 125644408 |

|   |           |             |              |          |       |           |           |
|---|-----------|-------------|--------------|----------|-------|-----------|-----------|
| 5 | 125497523 | 125659585 - | NM_011424    | Ncor2    | 15177 | 125644208 | 125644408 |
| 5 | 125757457 | 125821465 - | NM_001205082 | Scarb1   | -7120 | 125828585 | 125828785 |
| 5 | 125757457 | 125821465 - | NM_001205082 | Scarb1   | 49129 | 125772136 | 125772336 |
| 5 | 125757457 | 125821465 - | NM_001205082 | Scarb1   | 3896  | 125817369 | 125817569 |
| 5 | 125757457 | 125821465 - | NM_016741    | Scarb1   | -7120 | 125828585 | 125828785 |
| 5 | 125757457 | 125821465 - | NM_016741    | Scarb1   | 49129 | 125772136 | 125772336 |
| 5 | 125757457 | 125821465 - | NM_016741    | Scarb1   | 3896  | 125817369 | 125817569 |
| 5 | 125763690 | 125821465 - | NM_001205083 | Scarb1   | -7120 | 125828585 | 125828785 |
| 5 | 125763690 | 125821465 - | NM_001205083 | Scarb1   | 49129 | 125772136 | 125772336 |
| 5 | 125763690 | 125821465 - | NM_001205083 | Scarb1   | 3896  | 125817369 | 125817569 |
| 5 | 125921938 | 125941256 + | NM_029752    | Bri3bp   | 16104 | 125938042 | 125938242 |
| 5 | 126012788 | 126272954 + | NM_001190352 | Tmem132b | 20986 | 126033774 | 126033974 |
| 5 | 129602625 | 129710475 + | NM_001081342 | Adgrd1   | -3070 | 129599355 | 129599555 |
| 5 | 129602625 | 129710475 + | NM_001081342 | Adgrd1   | -2025 | 129600400 | 129600600 |
| 5 | 130189266 | 130214387 - | NM_028826    | Sept14   | -6825 | 130221212 | 130221412 |
| 5 | 130221403 | 130224567 + | NM_025450    | Mrps17   | 0     | 130221212 | 130221412 |
| 5 | 130230950 | 130264202 + | NM_008095    | Gbas     | -9538 | 130221212 | 130221412 |
| 5 | 130417979 | 130462563 + | NM_001001327 | Vkorc1l1 | 13788 | 130431767 | 130431967 |
| 5 | 130417979 | 130462563 + | NM_001001327 | Vkorc1l1 | 32911 | 130450890 | 130451090 |
| 5 | 130417979 | 130462563 + | NM_001001327 | Vkorc1l1 | -646  | 130417133 | 130417333 |
| 5 | 130417979 | 130462563 + | NM_001286382 | Vkorc1l1 | 13788 | 130431767 | 130431967 |
| 5 | 130417979 | 130462563 + | NM_001286382 | Vkorc1l1 | 32911 | 130450890 | 130451090 |
| 5 | 130417979 | 130462563 + | NM_001286382 | Vkorc1l1 | -646  | 130417133 | 130417333 |
| 5 | 130417979 | 130462563 + | NM_027121    | Vkorc1l1 | 13788 | 130431767 | 130431967 |
| 5 | 130417979 | 130462563 + | NM_027121    | Vkorc1l1 | 32911 | 130450890 | 130451090 |
| 5 | 130417979 | 130462563 + | NM_027121    | Vkorc1l1 | -646  | 130417133 | 130417333 |
| 5 | 130487373 | 130500202 - | NM_133768    | Asl      | 343   | 130499659 | 130499859 |
| 5 | 130487373 | 130500202 - | NM_133768    | Asl      | -5261 | 130505463 | 130505663 |
| 5 | 130505176 | 130536654 + | NM_007761    | Crcp     | -5317 | 130499659 | 130499859 |
| 5 | 130505176 | 130536654 + | NM_007761    | Crcp     | 287   | 130505463 | 130505663 |



|   |           |             |              |          |         |           |           |
|---|-----------|-------------|--------------|----------|---------|-----------|-----------|
| 5 | 130647689 | 130690208 + | NM_001199059 | Rabgef1  | 3062    | 130650751 | 130650951 |
| 5 | 130721602 | 130731333 - | NM_023248    | Sbds     | 0       | 130731269 | 130731469 |
| 5 | 130731489 | 130761257 + | NM_178897    | Tyw1     | -20     | 130731269 | 130731469 |
| 5 | 130732907 | 130817438 + | NM_001015876 | Tyw1     | -1438   | 130731269 | 130731469 |
| 5 | 131913552 | 133018214 - | NM_177047    | Auts2    | 810810  | 132207204 | 132207404 |
| 5 | 131913552 | 133018214 - | NM_177047    | Auts2    | 271948  | 132746066 | 132746266 |
| 5 | 131913552 | 133018214 - | NM_177047    | Auts2    | 644652  | 132373362 | 132373562 |
| 5 | 131913552 | 133018214 - | NM_177047    | Auts2    | 620020  | 132397994 | 132398194 |
| 5 | 131913552 | 133018214 - | NM_177047    | Auts2    | 699951  | 132318063 | 132318263 |
| 5 | 131913552 | 133018214 - | NM_177047    | Auts2    | 1041865 | 131976149 | 131976349 |
| 5 | 131913552 | 133018214 - | NM_177047    | Auts2    | 948893  | 132069121 | 132069321 |
| 5 | 131913552 | 133018214 - | NM_177047    | Auts2    | 1017102 | 132000912 | 132001112 |
| 5 | 131913552 | 133018214 - | NM_177047    | Auts2    | 1055512 | 131962502 | 131962702 |
| 5 | 131913552 | 133018214 - | NM_177047    | Auts2    | 1051511 | 131966503 | 131966703 |
| 5 | 134623928 | 134652638 - | NM_033572    | Wbscr16  | -331    | 134652969 | 134653169 |
| 5 | 134659908 | 134694014 + | NM_053266    | Gtf2ird2 | -6739   | 134652969 | 134653169 |
| 5 | 134833531 | 134932587 - | NM_001081462 | Gtf2ird1 | 26337   | 134906050 | 134906250 |
| 5 | 134833531 | 134932587 - | NM_001081463 | Gtf2ird1 | 26337   | 134906050 | 134906250 |
| 5 | 134833531 | 134932587 - | NM_001081464 | Gtf2ird1 | 26337   | 134906050 | 134906250 |
| 5 | 134833531 | 134932133 - | NM_001081465 | Gtf2ird1 | 25883   | 134906050 | 134906250 |
| 5 | 134833531 | 134932587 - | NM_001081466 | Gtf2ird1 | 26337   | 134906050 | 134906250 |
| 5 | 134833531 | 134932587 - | NM_001081467 | Gtf2ird1 | 26337   | 134906050 | 134906250 |
| 5 | 134833531 | 134932587 - | NM_001081468 | Gtf2ird1 | 26337   | 134906050 | 134906250 |
| 5 | 134833531 | 134932587 - | NM_001081469 | Gtf2ird1 | 26337   | 134906050 | 134906250 |
| 5 | 134833531 | 134932587 - | NM_001081470 | Gtf2ird1 | 26337   | 134906050 | 134906250 |
| 5 | 134833531 | 134932587 - | NM_001244936 | Gtf2ird1 | 26337   | 134906050 | 134906250 |
| 5 | 134833531 | 134932587 - | NM_020331    | Gtf2ird1 | 26337   | 134906050 | 134906250 |
| 5 | 134965253 | 135028305 - | NM_001039162 | Clip2    | -8219   | 135036524 | 135036724 |
| 5 | 134965253 | 135028305 - | NM_009990    | Clip2    | -8219   | 135036524 | 135036724 |
| 5 | 135033124 | 135036042 - | NM_001013751 | Syna     | -482    | 135036524 | 135036724 |

|   |           |             |              |         |       |           |           |
|---|-----------|-------------|--------------|---------|-------|-----------|-----------|
| 5 | 135095746 | 135115199 - | NM_033561    | Eif4h   | 9484  | 135105515 | 135105715 |
| 5 | 135408243 | 135418508 + | NM_024479    | Wbscr27 | 106   | 135408349 | 135408549 |
| 5 | 135420993 | 135422805 - | NM_009903    | Cldn4   | -4299 | 135427104 | 135427304 |
| 5 | 135462084 | 135463347 + | NM_009902    | Cldn3   | -9781 | 135452103 | 135452303 |
| 5 | 135582761 | 135614253 + | NM_021455    | Mlxipl  | -620  | 135581941 | 135582141 |
| 5 | 135582761 | 135614253 + | NM_021455    | Mlxipl  | 11849 | 135594610 | 135594810 |
| 5 | 135582761 | 135614253 + | NM_021455    | Mlxipl  | -3203 | 135579358 | 135579558 |
| 5 | 135644242 | 135657723 + | NM_009745    | Bcl7b   | 3998  | 135648240 | 135648440 |
| 5 | 135882388 | 136020993 - | NM_146001    | Hip1    | 1161  | 136019632 | 136019832 |
| 5 | 135882388 | 136020993 - | NM_146001    | Hip1    | 52721 | 135968072 | 135968272 |
| 5 | 136036318 | 136039440 - | NM_001013412 | Ccl26   | -3999 | 136043439 | 136043639 |
| 5 | 136036318 | 136039440 - | NM_001013412 | Ccl26   | -193  | 136039633 | 136039833 |
| 5 | 136165015 | 136211197 + | NM_008898    | Por     | -5733 | 136159082 | 136159282 |
| 5 | 136165015 | 136211197 + | NM_008898    | Por     | 19270 | 136184285 | 136184485 |
| 5 | 136165015 | 136211197 + | NM_008898    | Por     | -290  | 136164525 | 136164725 |
| 5 | 136165015 | 136211197 + | NM_008898    | Por     | -7870 | 136156945 | 136157145 |
| 5 | 136165015 | 136211197 + | NM_008898    | Por     | -6391 | 136158424 | 136158624 |
| 5 | 136223090 | 136254172 - | NM_001289554 | Styx11  | 13976 | 136239996 | 136240196 |
| 5 | 136223090 | 136254172 - | NM_001289554 | Styx11  | -4696 | 136258868 | 136259068 |
| 5 | 136223090 | 136254172 - | NM_001289554 | Styx11  | -8283 | 136262455 | 136262655 |
| 5 | 136223090 | 136254172 - | NM_001289554 | Styx11  | 1583  | 136252389 | 136252589 |
| 5 | 136223090 | 136254172 - | NM_001289555 | Styx11  | 13976 | 136239996 | 136240196 |
| 5 | 136223090 | 136254172 - | NM_001289555 | Styx11  | -4696 | 136258868 | 136259068 |
| 5 | 136223090 | 136254172 - | NM_001289555 | Styx11  | -8283 | 136262455 | 136262655 |
| 5 | 136223090 | 136254172 - | NM_001289555 | Styx11  | 1583  | 136252389 | 136252589 |
| 5 | 136223090 | 136254256 - | NM_001289556 | Styx11  | 14060 | 136239996 | 136240196 |
| 5 | 136223090 | 136254256 - | NM_001289556 | Styx11  | -4612 | 136258868 | 136259068 |
| 5 | 136223090 | 136254256 - | NM_001289556 | Styx11  | -8199 | 136262455 | 136262655 |
| 5 | 136223090 | 136254256 - | NM_001289556 | Styx11  | 1667  | 136252389 | 136252589 |
| 5 | 136223090 | 136254256 - | NM_001289557 | Styx11  | 14060 | 136239996 | 136240196 |

|   |           |             |              |        |        |           |           |
|---|-----------|-------------|--------------|--------|--------|-----------|-----------|
| 5 | 136223090 | 136254256 - | NM_001289557 | Styx1  | -4612  | 136258868 | 136259068 |
| 5 | 136223090 | 136254256 - | NM_001289557 | Styx1  | -8199  | 136262455 | 136262655 |
| 5 | 136223090 | 136254256 - | NM_001289557 | Styx1  | 1667   | 136252389 | 136252589 |
| 5 | 136223090 | 136254256 - | NM_029659    | Styx1  | 14060  | 136239996 | 136240196 |
| 5 | 136223090 | 136254256 - | NM_029659    | Styx1  | -4612  | 136258868 | 136259068 |
| 5 | 136223090 | 136254256 - | NM_029659    | Styx1  | -8199  | 136262455 | 136262655 |
| 5 | 136223090 | 136254256 - | NM_029659    | Styx1  | 1667   | 136252389 | 136252589 |
| 5 | 136254519 | 136266257 + | NM_008617    | Mdh2   | 4349   | 136258868 | 136259068 |
| 5 | 136254519 | 136266257 + | NM_008617    | Mdh2   | 7936   | 136262455 | 136262655 |
| 5 | 136254519 | 136266257 + | NM_008617    | Mdh2   | -1930  | 136252389 | 136252589 |
| 5 | 136363789 | 136365434 + | NM_013560    | Hspb1  | -9948  | 136353641 | 136353841 |
| 5 | 136514366 | 136520864 + | NM_175309    | Upk3b  | 440    | 136514806 | 136515006 |
| 5 | 136598936 | 136611945 - | NM_027891    | Lrwd1  | -85    | 136612030 | 136612230 |
| 5 | 136598936 | 136611945 - | NM_027891    | Lrwd1  | 298    | 136611447 | 136611647 |
| 5 | 136614651 | 136617485 + | NM_028070    | Alkbh4 | -2421  | 136612030 | 136612230 |
| 5 | 136614651 | 136617485 + | NM_028070    | Alkbh4 | -3004  | 136611447 | 136611647 |
| 5 | 136724005 | 137043361 - | NM_001291238 | Cux1   | 39682  | 137003479 | 137003679 |
| 5 | 136724005 | 137043361 - | NM_001291238 | Cux1   | 30100  | 137013061 | 137013261 |
| 5 | 136724005 | 137043361 - | NM_001291238 | Cux1   | 304866 | 136738295 | 136738495 |
| 5 | 136724005 | 137041852 - | NM_001291239 | Cux1   | 38173  | 137003479 | 137003679 |
| 5 | 136724005 | 137041852 - | NM_001291239 | Cux1   | 28591  | 137013061 | 137013261 |
| 5 | 136724005 | 137041852 - | NM_001291239 | Cux1   | 303357 | 136738295 | 136738495 |
| 5 | 136724005 | 137041852 - | NM_001291240 | Cux1   | 38173  | 137003479 | 137003679 |
| 5 | 136724005 | 137041852 - | NM_001291240 | Cux1   | 28591  | 137013061 | 137013261 |
| 5 | 136724005 | 137041852 - | NM_001291240 | Cux1   | 303357 | 136738295 | 136738495 |
| 5 | 136724005 | 137043361 - | NM_198602    | Cux1   | 39682  | 137003479 | 137003679 |
| 5 | 136724005 | 137043361 - | NM_198602    | Cux1   | 30100  | 137013061 | 137013261 |
| 5 | 136724005 | 137043361 - | NM_198602    | Cux1   | 304866 | 136738295 | 136738495 |
| 5 | 136742280 | 137041852 - | NM_001291233 | Cux1   | 38173  | 137003479 | 137003679 |
| 5 | 136742280 | 137041852 - | NM_001291233 | Cux1   | 28591  | 137013061 | 137013261 |

|   |           |             |              |               |       |           |           |
|---|-----------|-------------|--------------|---------------|-------|-----------|-----------|
| 5 | 136742280 | 137043361 - | NM_001291234 | Cux1          | 39682 | 137003479 | 137003679 |
| 5 | 136742280 | 137043361 - | NM_001291234 | Cux1          | 30100 | 137013061 | 137013261 |
| 5 | 136742280 | 137043361 - | NM_009986    | Cux1          | 39682 | 137003479 | 137003679 |
| 5 | 136742280 | 137043361 - | NM_009986    | Cux1          | 30100 | 137013061 | 137013261 |
| 5 | 137217634 | 137358978 - | NM_024474    | Col26a1       | 58551 | 137300227 | 137300427 |
| 5 | 137395016 | 137412980 + | NR_015555    | 4933404O12Rik | 8387  | 137403403 | 137403603 |
| 5 | 137395016 | 137412980 + | NR_015555    | 4933404O12Rik | 4896  | 137399912 | 137400112 |
| 5 | 137429145 | 137442105 + | NM_001163243 | Fis1          | 12003 | 137441148 | 137441348 |
| 5 | 137437947 | 137442105 + | NM_025562    | Fis1          | 3201  | 137441148 | 137441348 |
| 5 | 137443739 | 137451716 + | NM_021719    | Cldn15        | -2391 | 137441148 | 137441348 |
| 5 | 137506165 | 137509222 + | NM_001039385 | Vgf           | -29   | 137505936 | 137506136 |
| 5 | 137729482 | 137735695 + | NM_001290010 | Ache          | 1541  | 137731023 | 137731223 |
| 5 | 137729482 | 137735695 + | NM_001290010 | Ache          | 5667  | 137735149 | 137735349 |
| 5 | 137729482 | 137735695 + | NM_009599    | Ache          | 1541  | 137731023 | 137731223 |
| 5 | 137729482 | 137735695 + | NM_009599    | Ache          | 5667  | 137735149 | 137735349 |
| 5 | 137735008 | 137735105 + | NR_106196    | Mir8116       | -3785 | 137731023 | 137731223 |
| 5 | 137735008 | 137735105 + | NR_106196    | Mir8116       | 141   | 137735149 | 137735349 |
| 5 | 137735897 | 137736893 + | NM_027356    | Ufsp1         | -4674 | 137731023 | 137731223 |
| 5 | 137735897 | 137736893 + | NM_027356    | Ufsp1         | -548  | 137735149 | 137735349 |
| 5 | 137737852 | 137737917 - | NR_106003    | Mir7036       | 2568  | 137735149 | 137735349 |
| 5 | 137751127 | 137755470 - | NM_011639    | Trip6         | -4443 | 137759913 | 137760113 |
| 5 | 137755786 | 137774811 - | NM_031406    | Slc12a9       | 14698 | 137759913 | 137760113 |
| 5 | 137755786 | 137774811 - | NM_031406    | Slc12a9       | -3590 | 137778401 | 137778601 |
| 5 | 137942667 | 137943658 - | NM_028753    | Pop7          | 0     | 137943524 | 137943724 |
| 5 | 137969357 | 137974458 - | NM_010312    | Gnb2          | -2784 | 137977242 | 137977442 |
| 5 | 137970708 | 137970823 - | NR_105846    | Mir6418       | -6419 | 137977242 | 137977442 |
| 5 | 138011068 | 138029310 + | NM_001289509 | Tfr2          | 15267 | 138026335 | 138026535 |
| 5 | 138011068 | 138029310 + | NM_015799    | Tfr2          | 15267 | 138026335 | 138026535 |
| 5 | 138011948 | 138029310 + | NM_001289511 | Tfr2          | 14387 | 138026335 | 138026535 |
| 5 | 138012033 | 138029310 + | NM_001289507 | Tfr2          | 14302 | 138026335 | 138026535 |

|   |           |             |              |         |       |           |           |
|---|-----------|-------------|--------------|---------|-------|-----------|-----------|
| 5 | 138046335 | 138052633 - | NM_008788    | Pcolce  | -3956 | 138056589 | 138056789 |
| 5 | 138053733 | 138066307 - | NM_027708    | Fbxo24  | -4734 | 138071041 | 138071241 |
| 5 | 138053733 | 138066307 - | NM_027708    | Fbxo24  | 9518  | 138056589 | 138056789 |
| 5 | 138070351 | 138084125 + | NR_033148    | Gm20605 | 690   | 138071041 | 138071241 |
| 5 | 138070351 | 138082328 + | NM_001168652 | Lrch4   | 690   | 138071041 | 138071241 |
| 5 | 138070351 | 138082328 + | NM_146164    | Lrch4   | 690   | 138071041 | 138071241 |
| 5 | 138091706 | 138125982 - | NM_001303266 | Agfg2   | 26824 | 138098958 | 138099158 |
| 5 | 138091706 | 138125982 - | NM_001303266 | Agfg2   | 1029  | 138124753 | 138124953 |
| 5 | 138091706 | 138125982 - | NM_001303271 | Agfg2   | 26824 | 138098958 | 138099158 |
| 5 | 138091706 | 138125982 - | NM_001303271 | Agfg2   | 1029  | 138124753 | 138124953 |
| 5 | 138091706 | 138125982 - | NM_178162    | Agfg2   | 26824 | 138098958 | 138099158 |
| 5 | 138091706 | 138125982 - | NM_178162    | Agfg2   | 1029  | 138124753 | 138124953 |
| 5 | 138223134 | 138227930 - | NM_144913    | Mepce   | -716  | 138228646 | 138228846 |
| 5 | 138229030 | 138263850 + | NM_001005426 | Zcwpw1  | -184  | 138228646 | 138228846 |
| 5 | 138334161 | 138362848 - | NM_007819    | Cyp3a13 | 1130  | 138361518 | 138361718 |
| 5 | 138334161 | 138362848 - | NM_007819    | Cyp3a13 | -1090 | 138363938 | 138364138 |
| 5 | 138334161 | 138362848 - | NM_007819    | Cyp3a13 | -5136 | 138367984 | 138368184 |
| 5 | 138334161 | 138362848 - | NM_007819    | Cyp3a13 | -114  | 138362962 | 138363162 |
| 5 | 138605817 | 138613091 - | NM_008568    | Mcm7    | 571   | 138612320 | 138612520 |
| 5 | 138606549 | 138606633 - | NR_029787    | Mir25   | -5687 | 138612320 | 138612520 |
| 5 | 138606751 | 138606839 - | NR_029749    | Mir93   | -5481 | 138612320 | 138612520 |
| 5 | 138606965 | 138607047 - | NR_029658    | Mir106b | -5273 | 138612320 | 138612520 |
| 5 | 138613249 | 138619914 + | NM_021392    | Ap4m1   | -729  | 138612320 | 138612520 |
| 5 | 138721737 | 138753622 + | NM_016964    | Stag3   | 19158 | 138740895 | 138741095 |
| 5 | 139452929 | 139470908 - | NM_008808    | Pdgfa   | 2676  | 139468032 | 139468232 |
| 5 | 139676591 | 139725794 + | NM_001256115 | Sun1    | 9096  | 139685687 | 139685887 |
| 5 | 139676591 | 139725794 + | NM_001256115 | Sun1    | 41091 | 139717682 | 139717882 |
| 5 | 139676591 | 139725794 + | NM_001256115 | Sun1    | 25955 | 139702546 | 139702746 |
| 5 | 139676591 | 139725794 + | NM_001256117 | Sun1    | 9096  | 139685687 | 139685887 |
| 5 | 139676591 | 139725794 + | NM_001256117 | Sun1    | 41091 | 139717682 | 139717882 |

|   |           |             |              |               |       |           |           |
|---|-----------|-------------|--------------|---------------|-------|-----------|-----------|
| 5 | 139676591 | 139725794 + | NM_001256117 | Sun1          | 25955 | 139702546 | 139702746 |
| 5 | 139676591 | 139725794 + | NM_024451    | Sun1          | 9096  | 139685687 | 139685887 |
| 5 | 139676591 | 139725794 + | NM_024451    | Sun1          | 41091 | 139717682 | 139717882 |
| 5 | 139676591 | 139725794 + | NM_024451    | Sun1          | 25955 | 139702546 | 139702746 |
| 5 | 139691112 | 139725794 + | NM_001256116 | Sun1          | -5225 | 139685687 | 139685887 |
| 5 | 139691112 | 139725794 + | NM_001256116 | Sun1          | 26570 | 139717682 | 139717882 |
| 5 | 139691112 | 139725794 + | NM_001256116 | Sun1          | 11434 | 139702546 | 139702746 |
| 5 | 139691112 | 139725794 + | NM_001256118 | Sun1          | -5225 | 139685687 | 139685887 |
| 5 | 139691112 | 139725794 + | NM_001256118 | Sun1          | 26570 | 139717682 | 139717882 |
| 5 | 139691112 | 139725794 + | NM_001256118 | Sun1          | 11434 | 139702546 | 139702746 |
| 5 | 139728278 | 139746005 + | NM_026269    | Get4          | 852   | 139729130 | 139729330 |
| 5 | 139729451 | 139746005 + | NM_001163316 | Get4          | -121  | 139729130 | 139729330 |
| 5 | 139747830 | 139801419 - | NM_172723    | Adap1         | 8845  | 139792374 | 139792574 |
| 5 | 139747830 | 139801419 - | NM_172723    | Adap1         | -7091 | 139808510 | 139808710 |
| 5 | 139747830 | 139801419 - | NM_172723    | Adap1         | 8112  | 139793107 | 139793307 |
| 5 | 139835693 | 139936489 - | NM_028469    | 3110082I17Rik | 81392 | 139854897 | 139855097 |
| 5 | 139835693 | 139936489 - | NM_028469    | 3110082I17Rik | 61721 | 139874568 | 139874768 |
| 5 | 139845604 | 139845700 - | NR_029768    | Mir339        | -9197 | 139854897 | 139855097 |
| 5 | 139853651 | 139856008 + | NR_033147    | D830046C22Rik | 1246  | 139854897 | 139855097 |
| 5 | 139856621 | 139872364 + | NM_030258    | Gpr146        | -1524 | 139854897 | 139855097 |
| 5 | 139882341 | 139892047 + | NM_177000    | C130050O18Rik | -7573 | 139874568 | 139874768 |
| 5 | 139947170 | 139960446 - | NM_001159908 | Zfand2a       | 3584  | 139956662 | 139956862 |
| 5 | 139947170 | 139960446 - | NM_133349    | Zfand2a       | 3584  | 139956662 | 139956862 |
| 5 | 140182647 | 140212288 - | NM_174850    | Micall2       | -2264 | 140214552 | 140214752 |
| 5 | 140267490 | 140278607 + | NM_010757    | Mafk          | 4690  | 140272180 | 140272380 |
| 5 | 140280906 | 140290238 - | NM_001161548 | Tmem184a      | -3887 | 140294125 | 140294325 |
| 5 | 140280906 | 140290238 - | NM_001161548 | Tmem184a      | -7872 | 140298110 | 140298310 |
| 5 | 140280906 | 140290238 - | NM_001161548 | Tmem184a      | -4797 | 140295035 | 140295235 |
| 5 | 140280906 | 140290238 - | NM_001161548 | Tmem184a      | 2270  | 140287768 | 140287968 |
| 5 | 140280906 | 140289198 - | NM_144914    | Tmem184a      | -4927 | 140294125 | 140294325 |

|   |           |             |              |          |        |           |           |
|---|-----------|-------------|--------------|----------|--------|-----------|-----------|
| 5 | 140280906 | 140289198 - | NM_144914    | Tmem184a | -8912  | 140298110 | 140298310 |
| 5 | 140280906 | 140289198 - | NM_144914    | Tmem184a | -5837  | 140295035 | 140295235 |
| 5 | 140280906 | 140289198 - | NM_144914    | Tmem184a | 1230   | 140287768 | 140287968 |
| 5 | 140484643 | 140797507 - | NM_010752    | Mad1l1   | 54236  | 140743071 | 140743271 |
| 5 | 140484643 | 140797507 - | NM_010752    | Mad1l1   | 141041 | 140656266 | 140656466 |
| 5 | 140803628 | 140807853 - | NM_026510    | Ftsj2    | -761   | 140808614 | 140808814 |
| 5 | 140807876 | 140814090 + | NM_008637    | Nudt1    | 738    | 140808614 | 140808814 |
| 5 | 141139459 | 141178333 - | NM_028833    | lqce     | -6739  | 141185072 | 141185272 |
| 5 | 141180965 | 141195333 + | NM_181066    | Brat1    | 4107   | 141185072 | 141185272 |
| 5 | 141180965 | 141195333 + | NR_074085    | Brat1    | 4107   | 141185072 | 141185272 |
| 5 | 141181020 | 141195333 + | NM_001276287 | Brat1    | 4052   | 141185072 | 141185272 |
| 5 | 141348953 | 141476551 - | NM_175362    | Card11   | 88236  | 141388115 | 141388315 |
| 5 | 141717488 | 142689746 + | NM_177879    | Sdk1     | 610707 | 142328195 | 142328395 |
| 5 | 141717488 | 142689746 + | NM_177879    | Sdk1     | 925458 | 142642946 | 142643146 |
| 5 | 141717488 | 142689746 + | NM_177879    | Sdk1     | 138516 | 141856004 | 141856204 |
| 5 | 141717488 | 142689746 + | NM_177879    | Sdk1     | 610253 | 142327741 | 142327941 |
| 5 | 141717488 | 142689746 + | NM_177879    | Sdk1     | 560669 | 142278157 | 142278357 |
| 5 | 141717488 | 142689746 + | NM_177879    | Sdk1     | 65472  | 141782960 | 141783160 |
| 5 | 142877451 | 142937970 + | NM_199068    | Foxk1    | 24093  | 142901544 | 142901744 |
| 5 | 142877451 | 142937970 + | NM_199068    | Foxk1    | 38385  | 142915836 | 142916036 |
| 5 | 142877451 | 142937970 + | NM_199068    | Foxk1    | 1279   | 142878730 | 142878930 |
| 5 | 142877451 | 142937970 + | NM_199068    | Foxk1    | 5039   | 142882490 | 142882690 |
| 5 | 143039435 | 143084707 - | NM_175217    | Mmd2     | 31560  | 143052947 | 143053147 |
| 5 | 143105538 | 143145325 + | NM_178398    | Wipi2    | 21598  | 143127136 | 143127336 |
| 5 | 143200558 | 143579067 - | NM_001122730 | Tnrc18   | 57589  | 143521278 | 143521478 |
| 5 | 143200558 | 143579067 - | NM_001122730 | Tnrc18   | 5339   | 143573528 | 143573728 |
| 5 | 143516534 | 143579067 - | NM_178242    | Tnrc18   | 57589  | 143521278 | 143521478 |
| 5 | 143516534 | 143579067 - | NM_178242    | Tnrc18   | 5339   | 143573528 | 143573728 |
| 5 | 143664796 | 143668434 - | NM_007393    | Actb     | -6155  | 143674589 | 143674789 |
| 5 | 144119017 | 144153148 + | NM_001159321 | Grid2ip  | 29440  | 144148457 | 144148657 |

|   |           |             |              |          |       |           |           |
|---|-----------|-------------|--------------|----------|-------|-----------|-----------|
| 5 | 144125587 | 144153478 + | NM_133355    | Grid2ip  | 22870 | 144148457 | 144148657 |
| 5 | 144165499 | 144182956 + | NM_025841    | Kdelr2   | -3047 | 144162252 | 144162452 |
| 5 | 144225361 | 144265311 + | NM_144915    | Daglb    | 33698 | 144259059 | 144259259 |
| 5 | 144309574 | 144325394 + | NM_026050    | Fam220a  | -2570 | 144306804 | 144307004 |
| 5 | 144309574 | 144325394 + | NM_133703    | Fam220a  | -2570 | 144306804 | 144307004 |
| 5 | 144471195 | 144493150 - | NM_029749    | Usp42    | -6817 | 144499967 | 144500167 |
| 5 | 144578661 | 144663587 + | NM_013557    | Eif2ak1  | 84717 | 144663378 | 144663578 |
| 5 | 144578661 | 144663587 + | NM_013557    | Eif2ak1  | 384   | 144579045 | 144579245 |
| 5 | 144651610 | 144655937 - | NM_001310772 | Ankrd61  | -7441 | 144663378 | 144663578 |
| 5 | 144651610 | 144655937 - | NM_025732    | Ankrd61  | -7441 | 144663378 | 144663578 |
| 5 | 144663573 | 144670709 - | NM_001172146 | Aimp2    | 7131  | 144663378 | 144663578 |
| 5 | 144663573 | 144670709 - | NM_146165    | Aimp2    | 7131  | 144663378 | 144663578 |
| 5 | 144670870 | 144692626 + | NM_008886    | Pms2     | -7292 | 144663378 | 144663578 |
| 5 | 144861305 | 144949074 + | NM_001081109 | Lmtk2    | 82598 | 144943903 | 144944103 |
| 5 | 144951155 | 144955311 + | NM_010800    | Bhlha15  | -7052 | 144943903 | 144944103 |
| 5 | 145025394 | 145118982 - | NM_025833    | Baiap2l1 | -2465 | 145121447 | 145121647 |
| 5 | 145025394 | 145118982 - | NM_025833    | Baiap2l1 | 40188 | 145078594 | 145078794 |
| 5 | 145025394 | 145118982 - | NM_025833    | Baiap2l1 | 3539  | 145115243 | 145115443 |
| 5 | 145025394 | 145118982 - | NM_025833    | Baiap2l1 | 12220 | 145106562 | 145106762 |
| 5 | 145025394 | 145118982 - | NM_025833    | Baiap2l1 | 93022 | 145025760 | 145025960 |
| 5 | 145025394 | 145118982 - | NM_025833    | Baiap2l1 | 86082 | 145032700 | 145032900 |
| 5 | 145037930 | 145041384 + | NR_040432    | Gm15708  | -5030 | 145032700 | 145032900 |
| 5 | 145118792 | 145121875 + | NR_102374    | Dmr      | 2655  | 145121447 | 145121647 |
| 5 | 145118792 | 145121875 + | NR_102374    | Dmr      | -3349 | 145115243 | 145115443 |
| 5 | 145119394 | 145121875 + | NR_102372    | Dmr      | 2053  | 145121447 | 145121647 |
| 5 | 145119394 | 145121875 + | NR_102372    | Dmr      | -3951 | 145115243 | 145115443 |
| 5 | 145119394 | 145121875 + | NR_102373    | Dmr      | 2053  | 145121447 | 145121647 |
| 5 | 145119394 | 145121875 + | NR_102373    | Dmr      | -3951 | 145115243 | 145115443 |
| 5 | 145637364 | 145726700 - | NM_001038627 | Smurf1   | 32034 | 145694466 | 145694666 |
| 5 | 145637364 | 145726700 - | NM_029438    | Smurf1   | 32034 | 145694466 | 145694666 |



|   |           |             |              |               |        |           |           |
|---|-----------|-------------|--------------|---------------|--------|-----------|-----------|
| 5 | 145844738 | 145869626 + | NM_019767    | Arpc1a        | 16551  | 145861289 | 145861489 |
| 5 | 145844738 | 145869626 + | NM_019767    | Arpc1a        | 19012  | 145863750 | 145863950 |
| 5 | 145992584 | 145999192 + | NM_001083958 | Zfp655        | -53    | 145992331 | 145992531 |
| 5 | 145992628 | 146008176 + | NM_028298    | Zfp655        | -97    | 145992331 | 145992531 |
| 5 | 146666183 | 146691431 - | NM_007818    | Cyp3a11       | -1484  | 146692915 | 146693115 |
| 5 | 146666183 | 146691431 - | NM_007818    | Cyp3a11       | -4975  | 146696406 | 146696606 |
| 5 | 146890834 | 146924860 + | NM_001105160 | Cyp3a59       | -9594  | 146881040 | 146881240 |
| 5 | 147020770 | 147032548 - | NM_001256085 | Rnf6          | 20     | 147032328 | 147032528 |
| 5 | 147020770 | 147032548 - | NM_001256086 | Rnf6          | 20     | 147032328 | 147032528 |
| 5 | 147020770 | 147032478 - | NM_001256087 | Rnf6          | 0      | 147032328 | 147032528 |
| 5 | 147020770 | 147033034 - | NM_028774    | Rnf6          | 506    | 147032328 | 147032528 |
| 5 | 147043251 | 147114451 + | NM_153599    | Cdk8          | 19079  | 147062330 | 147062530 |
| 5 | 147043251 | 147114451 + | NM_153599    | Cdk8          | 29415  | 147072666 | 147072866 |
| 5 | 147043251 | 147114451 + | NM_153599    | Cdk8          | 523    | 147043774 | 147043974 |
| 5 | 147546388 | 147606533 - | NM_011669    | Usp12         | 14950  | 147591383 | 147591583 |
| 5 | 147546388 | 147606533 - | NM_011669    | Usp12         | -4936  | 147611469 | 147611669 |
| 5 | 147546388 | 147606533 - | NM_011669    | Usp12         | 13219  | 147593114 | 147593314 |
| 5 | 147644466 | 147648609 + | NM_019647    | Rpl21         | -7881  | 147636385 | 147636585 |
| 5 | 147760233 | 147767191 + | NM_025652    | Gtf3a         | -5250  | 147754783 | 147754983 |
| 5 | 147760233 | 147767191 + | NM_025652    | Gtf3a         | -322   | 147759711 | 147759911 |
| 5 | 147760233 | 147767191 + | NM_025652    | Gtf3a         | -8444  | 147751589 | 147751789 |
| 5 | 148040174 | 148083098 - | NR_038157    | 2210019I11Rik | 30849  | 148052049 | 148052249 |
| 5 | 148112476 | 148118826 - | NM_007673    | Cdx2          | 152    | 148118474 | 148118674 |
| 5 | 148242156 | 148360078 + | NM_028291    | Pan3          | 27142  | 148269298 | 148269498 |
| 5 | 148672204 | 148687355 + | NM_025624    | Pomp          | 12439  | 148684643 | 148684843 |
| 5 | 148690017 | 148706379 - | NM_027872    | Slc46a3       | -1971  | 148708350 | 148708550 |
| 5 | 148690017 | 148706379 - | NM_027872    | Slc46a3       | -8135  | 148714514 | 148714714 |
| 5 | 148690017 | 148706379 - | NM_027872    | Slc46a3       | -7355  | 148713734 | 148713934 |
| 5 | 148690017 | 148706379 - | NM_027872    | Slc46a3       | -934   | 148707313 | 148707513 |
| 5 | 148768896 | 149127642 + | NM_029920    | Mtus2         | 223065 | 148991961 | 148992161 |

|   |           |             |              |               |        |           |           |
|---|-----------|-------------|--------------|---------------|--------|-----------|-----------|
| 5 | 149138986 | 149204392 - | NM_001301424 | Slc7a1        | 31274  | 149172918 | 149173118 |
| 5 | 149138986 | 149204392 - | NM_001301424 | Slc7a1        | -5863  | 149210255 | 149210455 |
| 5 | 149138986 | 149211481 - | NM_007513    | Slc7a1        | 38363  | 149172918 | 149173118 |
| 5 | 149138986 | 149211481 - | NM_007513    | Slc7a1        | 1026   | 149210255 | 149210455 |
| 5 | 149316207 | 149364365 - | NM_011908    | Ubl3          | 28813  | 149335352 | 149335552 |
| 5 | 149316207 | 149364365 - | NM_011908    | Ubl3          | 24784  | 149339381 | 149339581 |
| 5 | 149553416 | 149554716 + | NR_028285    | 2210417A02Rik | 1007   | 149554423 | 149554623 |
| 5 | 149858804 | 149864614 - | NM_010439    | Hmgb1         | -857   | 149865471 | 149865671 |
| 5 | 150242235 | 150273555 + | NM_001310763 | Tex26         | 27524  | 150269759 | 150269959 |
| 5 | 150242235 | 150273555 + | NM_001310764 | Tex26         | 27524  | 150269759 | 150269959 |
| 5 | 150242235 | 150273555 + | NM_001310765 | Tex26         | 27524  | 150269759 | 150269959 |
| 5 | 150242235 | 150273555 + | NM_029464    | Tex26         | 27524  | 150269759 | 150269959 |
| 5 | 150821250 | 150884762 + | NM_001289564 | Rxfp2         | 50921  | 150872171 | 150872371 |
| 5 | 150821250 | 150884762 + | NM_001289566 | Rxfp2         | 50921  | 150872171 | 150872371 |
| 5 | 150821250 | 150884762 + | NM_080468    | Rxfp2         | 50921  | 150872171 | 150872371 |
| 5 | 151062505 | 151300329 + | NM_172887    | Fry           | 73022  | 151135527 | 151135727 |
| 5 | 151325196 | 151372722 + | NM_001081001 | Brca2         | 39259  | 151364455 | 151364655 |
| 5 | 151325196 | 151372722 + | NM_009765    | Brca2         | 39259  | 151364455 | 151364655 |
| 5 | 151374218 | 151397101 - | NM_133898    | N4bp2l1       | 15743  | 151381158 | 151381358 |
| 5 | 151374218 | 151397101 - | NM_133898    | N4bp2l1       | -9211  | 151406312 | 151406512 |
| 5 | 151374218 | 151397101 - | NM_133898    | N4bp2l1       | 1163   | 151395738 | 151395938 |
| 5 | 151840090 | 151992769 - | NM_001163493 | Stard13       | 24960  | 151967609 | 151967809 |
| 5 | 151840090 | 151992769 - | NM_001163493 | Stard13       | 4451   | 151988118 | 151988318 |
| 5 | 151840090 | 151992769 - | NM_001163493 | Stard13       | 111943 | 151880626 | 151880826 |
| 5 | 151840090 | 151992769 - | NM_146258    | Stard13       | 24960  | 151967609 | 151967809 |
| 5 | 151840090 | 151992769 - | NM_146258    | Stard13       | 4451   | 151988118 | 151988318 |
| 5 | 151840090 | 151992769 - | NM_146258    | Stard13       | 111943 | 151880626 | 151880826 |
| 6 | 3944012   | 3947437 +   | NM_010314    | Gngt1         | -5009  | 3938803   | 3939003   |
| 6 | 5675639   | 5978040 +   | NM_001191023 | Dync1i1       | 132604 | 5808243   | 5808443   |
| 6 | 5675639   | 5978040 +   | NM_001191023 | Dync1i1       | 279253 | 5954892   | 5955092   |

|   |          |            |              |          |        |          |          |
|---|----------|------------|--------------|----------|--------|----------|----------|
| 6 | 5675639  | 5978040 +  | NM_001191023 | Dync1i1  | 68701  | 5744340  | 5744540  |
| 6 | 5675639  | 5978040 +  | NM_001191023 | Dync1i1  | 37417  | 5713056  | 5713256  |
| 6 | 5675639  | 5978040 +  | NM_001191025 | Dync1i1  | 132604 | 5808243  | 5808443  |
| 6 | 5675639  | 5978040 +  | NM_001191025 | Dync1i1  | 279253 | 5954892  | 5955092  |
| 6 | 5675639  | 5978040 +  | NM_001191025 | Dync1i1  | 68701  | 5744340  | 5744540  |
| 6 | 5675639  | 5978040 +  | NM_001191025 | Dync1i1  | 37417  | 5713056  | 5713256  |
| 6 | 5675639  | 5978040 +  | NM_001191026 | Dync1i1  | 132604 | 5808243  | 5808443  |
| 6 | 5675639  | 5978040 +  | NM_001191026 | Dync1i1  | 279253 | 5954892  | 5955092  |
| 6 | 5675639  | 5978040 +  | NM_001191026 | Dync1i1  | 68701  | 5744340  | 5744540  |
| 6 | 5675639  | 5978040 +  | NM_001191026 | Dync1i1  | 37417  | 5713056  | 5713256  |
| 6 | 5675639  | 5978040 +  | NM_001191027 | Dync1i1  | 132604 | 5808243  | 5808443  |
| 6 | 5675639  | 5978040 +  | NM_001191027 | Dync1i1  | 279253 | 5954892  | 5955092  |
| 6 | 5675639  | 5978040 +  | NM_001191027 | Dync1i1  | 68701  | 5744340  | 5744540  |
| 6 | 5675639  | 5978040 +  | NM_001191027 | Dync1i1  | 37417  | 5713056  | 5713256  |
| 6 | 5675639  | 5978040 +  | NM_010063    | Dync1i1  | 132604 | 5808243  | 5808443  |
| 6 | 5675639  | 5978040 +  | NM_010063    | Dync1i1  | 279253 | 5954892  | 5955092  |
| 6 | 5675639  | 5978040 +  | NM_010063    | Dync1i1  | 68701  | 5744340  | 5744540  |
| 6 | 5675639  | 5978040 +  | NM_010063    | Dync1i1  | 37417  | 5713056  | 5713256  |
| 6 | 5991218  | 6167174 -  | NM_001177572 | Slc25a13 | 67016  | 6099958  | 6100158  |
| 6 | 5991218  | 6167174 -  | NM_001177572 | Slc25a13 | 65786  | 6101188  | 6101388  |
| 6 | 5991218  | 6167174 -  | NM_015829    | Slc25a13 | 67016  | 6099958  | 6100158  |
| 6 | 5991218  | 6167174 -  | NM_015829    | Slc25a13 | 65786  | 6101188  | 6101388  |
| 6 | 6906018  | 6989221 +  | NM_001077713 | Sdhaf3   | 45406  | 6951424  | 6951624  |
| 6 | 6906018  | 6989221 +  | NM_001077713 | Sdhaf3   | 41535  | 6947553  | 6947753  |
| 6 | 8209288  | 8378766 +  | NM_001302353 | Umad1    | 168594 | 8377882  | 8378082  |
| 6 | 8209288  | 8378766 +  | NM_001302354 | Umad1    | 168594 | 8377882  | 8378082  |
| 6 | 14851349 | 15391978 + | NM_053242    | Foxp2    | 13989  | 14865338 | 14865538 |
| 6 | 15670661 | 15752170 + | NM_175088    | Mdfic    | -3250  | 15667211 | 15667411 |
| 6 | 17015149 | 17055826 + | NM_207176    | Tes      | 12085  | 17027234 | 17027434 |
| 6 | 17413957 | 17523981 + | NM_008591    | Met      | 109322 | 17523279 | 17523479 |

|   |          |            |              |         |        |          |          |
|---|----------|------------|--------------|---------|--------|----------|----------|
| 6 | 17413957 | 17523981 + | NM_008591    | Met     | 105339 | 17519296 | 17519496 |
| 6 | 17587098 | 17616537 + | NM_007604    | Capza2  | 5766   | 17592864 | 17593064 |
| 6 | 17643994 | 17893024 + | NM_001289624 | St7     | 189076 | 17833070 | 17833270 |
| 6 | 17643994 | 17893024 + | NM_001289625 | St7     | 189076 | 17833070 | 17833270 |
| 6 | 17643994 | 17893024 + | NM_001289626 | St7     | 189076 | 17833070 | 17833270 |
| 6 | 17693592 | 17893024 + | NM_001289627 | St7     | 139478 | 17833070 | 17833270 |
| 6 | 17693592 | 17893024 + | NM_001289629 | St7     | 139478 | 17833070 | 17833270 |
| 6 | 17699170 | 17893024 + | NM_001083315 | St7     | 133900 | 17833070 | 17833270 |
| 6 | 17699170 | 17893024 + | NM_022332    | St7     | 133900 | 17833070 | 17833270 |
| 6 | 18120687 | 18272770 + | NM_021050    | Cftr    | 9604   | 18130291 | 18130491 |
| 6 | 18120687 | 18272770 + | NM_021050    | Cftr    | 77263  | 18197950 | 18198150 |
| 6 | 18120687 | 18272770 + | NM_021050    | Cftr    | 85548  | 18206235 | 18206435 |
| 6 | 18120687 | 18272770 + | NM_021050    | Cftr    | 38143  | 18158830 | 18159030 |
| 6 | 18316477 | 18464826 - | NM_080285    | Cttnbp2 | 141733 | 18322893 | 18323093 |
| 6 | 21166109 | 21679806 + | NM_019697    | Kcnd2   | 455323 | 21621432 | 21621632 |
| 6 | 21721395 | 21802516 - | NM_173007    | Tspan12 | 45973  | 21756343 | 21756543 |
| 6 | 21721395 | 21802516 - | NM_173007    | Tspan12 | 1344   | 21800972 | 21801172 |
| 6 | 21899571 | 21926039 + | NM_001311061 | Ing3    | 2901   | 21902472 | 21902672 |
| 6 | 21899615 | 21926038 + | NM_023626    | Ing3    | 2857   | 21902472 | 21902672 |
| 6 | 21935910 | 22205607 + | NM_001081351 | Cped1   | 102876 | 22038786 | 22038986 |
| 6 | 22256522 | 22306082 - | NM_138587    | Fam3c   | 12365  | 22293517 | 22293717 |
| 6 | 22256522 | 22306082 - | NM_138587    | Fam3c   | 4014   | 22301868 | 22302068 |
| 6 | 22256522 | 22306082 - | NM_138587    | Fam3c   | 4404   | 22301478 | 22301678 |
| 6 | 22256522 | 22306082 - | NM_138587    | Fam3c   | 20095  | 22285787 | 22285987 |
| 6 | 22256522 | 22306082 - | NM_138587    | Fam3c   | 14326  | 22291556 | 22291756 |
| 6 | 22256522 | 22306082 - | NM_138587    | Fam3c   | 15985  | 22289897 | 22290097 |
| 6 | 23212774 | 23789422 - | NM_001252105 | Cadps2  | 218735 | 23570487 | 23570687 |
| 6 | 23212774 | 23789422 - | NM_001252105 | Cadps2  | 445033 | 23344189 | 23344389 |
| 6 | 23212774 | 23789422 - | NM_001252106 | Cadps2  | 218735 | 23570487 | 23570687 |
| 6 | 23212774 | 23789422 - | NM_001252106 | Cadps2  | 445033 | 23344189 | 23344389 |

|   |          |            |              |         |        |          |          |
|---|----------|------------|--------------|---------|--------|----------|----------|
| 6 | 23212774 | 23789422 - | NM_001252110 | Cadps2  | 218735 | 23570487 | 23570687 |
| 6 | 23212774 | 23789422 - | NM_001252110 | Cadps2  | 445033 | 23344189 | 23344389 |
| 6 | 23212774 | 23789422 - | NM_153163    | Cadps2  | 218735 | 23570487 | 23570687 |
| 6 | 23212774 | 23789422 - | NM_153163    | Cadps2  | 445033 | 23344189 | 23344389 |
| 6 | 23359370 | 23789422 - | NM_001252107 | Cadps2  | 218735 | 23570487 | 23570687 |
| 6 | 23377098 | 23789422 - | NM_001252108 | Cadps2  | 218735 | 23570487 | 23570687 |
| 6 | 23546254 | 23789422 - | NM_001252109 | Cadps2  | 218735 | 23570487 | 23570687 |
| 6 | 24038283 | 24118093 - | NM_019481    | Slc13a1 | 2526   | 24115367 | 24115567 |
| 6 | 24038283 | 24118093 - | NM_019481    | Slc13a1 | 28920  | 24088973 | 24089173 |
| 6 | 24394865 | 24465068 - | NM_172535    | Iqub    | 58745  | 24406123 | 24406323 |
| 6 | 24394865 | 24465068 - | NM_172535    | Iqub    | 63791  | 24401077 | 24401277 |
| 6 | 24478144 | 24523165 + | NM_080847    | Asb15   | 18579  | 24496723 | 24496923 |
| 6 | 24563810 | 24614996 - | NM_028459    | Wasl    | 1338   | 24613458 | 24613658 |
| 6 | 24563810 | 24614996 - | NM_028459    | Wasl    | -391   | 24615387 | 24615587 |
| 6 | 24582686 | 24614996 - | NM_001167745 | Wasl    | 1338   | 24613458 | 24613658 |
| 6 | 24582686 | 24614996 - | NM_001167745 | Wasl    | -391   | 24615387 | 24615587 |
| 6 | 25693735 | 25759227 - | NM_133931    | Pot1a   | 37     | 25758990 | 25759190 |
| 6 | 28366603 | 28371725 - | NM_028900    | Gcc1    | -2640  | 28374365 | 28374565 |
| 6 | 28366603 | 28371725 - | NM_028900    | Gcc1    | -9852  | 28381577 | 28381777 |
| 6 | 28366603 | 28371725 - | NM_028900    | Gcc1    | 0      | 28371550 | 28371750 |
| 6 | 28373640 | 28376500 + | NM_007480    | Arf5    | 725    | 28374365 | 28374565 |
| 6 | 28373640 | 28376500 + | NM_007480    | Arf5    | -1890  | 28371550 | 28371750 |
| 6 | 28377901 | 28388623 + | NM_019569    | Fscn3   | -3336  | 28374365 | 28374565 |
| 6 | 28377901 | 28388623 + | NM_019569    | Fscn3   | 3676   | 28381577 | 28381777 |
| 6 | 28377901 | 28388623 + | NM_019569    | Fscn3   | -6151  | 28371550 | 28371750 |
| 6 | 28392334 | 28399341 - | NM_001159925 | Pax4    | -6968  | 28406309 | 28406509 |
| 6 | 28392334 | 28399341 - | NM_001159926 | Pax4    | -6968  | 28406309 | 28406509 |
| 6 | 28392334 | 28399341 - | NM_011038    | Pax4    | -6968  | 28406309 | 28406509 |
| 6 | 28430348 | 28838833 + | NM_019776    | Snd1    | 253662 | 28684010 | 28684210 |
| 6 | 29417783 | 29420510 + | NM_025381    | Atp6v1f | -19    | 29417564 | 29417764 |

|   |          |            |              |          |       |          |          |
|---|----------|------------|--------------|----------|-------|----------|----------|
| 6 | 29417783 | 29420510 + | NM_025381    | Atp6v1f  | 120   | 29417903 | 29418103 |
| 6 | 29421437 | 29423430 + | NM_001145360 | Gm9047   | -3673 | 29417564 | 29417764 |
| 6 | 29421437 | 29423430 + | NM_001145360 | Gm9047   | -3334 | 29417903 | 29418103 |
| 6 | 29490827 | 29559608 - | NM_177296    | Tnpo3    | 25840 | 29533568 | 29533768 |
| 6 | 29718443 | 29862311 + | NM_001171000 | Ahcyl2   | 29250 | 29747693 | 29747893 |
| 6 | 29718443 | 29862311 + | NM_001171000 | Ahcyl2   | 79396 | 29797839 | 29798039 |
| 6 | 29718443 | 29862311 + | NM_001171000 | Ahcyl2   | 85098 | 29803541 | 29803741 |
| 6 | 29718443 | 29862311 + | NM_001171000 | Ahcyl2   | 33238 | 29751681 | 29751881 |
| 6 | 29718443 | 29862311 + | NM_001171000 | Ahcyl2   | -1282 | 29716961 | 29717161 |
| 6 | 29718443 | 29862311 + | NM_001171000 | Ahcyl2   | 16070 | 29734513 | 29734713 |
| 6 | 29718443 | 29862311 + | NM_001171000 | Ahcyl2   | 7173  | 29725616 | 29725816 |
| 6 | 29718443 | 29862311 + | NM_021414    | Ahcyl2   | 29250 | 29747693 | 29747893 |
| 6 | 29718443 | 29862311 + | NM_021414    | Ahcyl2   | 79396 | 29797839 | 29798039 |
| 6 | 29718443 | 29862311 + | NM_021414    | Ahcyl2   | 85098 | 29803541 | 29803741 |
| 6 | 29718443 | 29862311 + | NM_021414    | Ahcyl2   | 33238 | 29751681 | 29751881 |
| 6 | 29718443 | 29862311 + | NM_021414    | Ahcyl2   | -1282 | 29716961 | 29717161 |
| 6 | 29718443 | 29862311 + | NM_021414    | Ahcyl2   | 16070 | 29734513 | 29734713 |
| 6 | 29718443 | 29862311 + | NM_021414    | Ahcyl2   | 7173  | 29725616 | 29725816 |
| 6 | 29809596 | 29862311 + | NM_001171001 | Ahcyl2   | -5855 | 29803541 | 29803741 |
| 6 | 29997988 | 30103459 + | NM_001164226 | Nrf1     | 15709 | 30013697 | 30013897 |
| 6 | 29997988 | 30095198 + | NM_001164227 | Nrf1     | 15709 | 30013697 | 30013897 |
| 6 | 29997988 | 30095198 + | NM_001164228 | Nrf1     | 15709 | 30013697 | 30013897 |
| 6 | 29997988 | 30080116 + | NM_001164230 | Nrf1     | 15709 | 30013697 | 30013897 |
| 6 | 29997988 | 30103459 + | NM_010938    | Nrf1     | 15709 | 30013697 | 30013897 |
| 6 | 30108641 | 30124126 - | NR_126540    | Mirc35hg | -4465 | 30128591 | 30128791 |
| 6 | 30119446 | 30119552 - | NR_029750    | Mir96    | -9039 | 30128591 | 30128791 |
| 6 | 30119668 | 30119738 - | NR_030713    | Mir183   | -8853 | 30128591 | 30128791 |
| 6 | 30119935 | 30124126 - | NR_126541    | Mirc35hg | -4465 | 30128591 | 30128791 |
| 6 | 30126623 | 30128041 + | NR_038124    | BB283400 | 1968  | 30128591 | 30128791 |
| 6 | 30161289 | 30254540 - | NM_001169576 | Ube2h    | 72343 | 30181997 | 30182197 |

|   |          |            |              |               |        |          |          |
|---|----------|------------|--------------|---------------|--------|----------|----------|
| 6 | 30161289 | 30254540 - | NM_001169576 | Ube2h         | -3198  | 30257738 | 30257938 |
| 6 | 30161289 | 30254540 - | NM_001169576 | Ube2h         | 75553  | 30178787 | 30178987 |
| 6 | 30161289 | 30193804 - | NM_001169577 | Ube2h         | 11607  | 30181997 | 30182197 |
| 6 | 30161289 | 30193804 - | NM_001169577 | Ube2h         | 14817  | 30178787 | 30178987 |
| 6 | 30161289 | 30254540 - | NM_009459    | Ube2h         | 72343  | 30181997 | 30182197 |
| 6 | 30161289 | 30254540 - | NM_009459    | Ube2h         | -3198  | 30257738 | 30257938 |
| 6 | 30161289 | 30254540 - | NM_009459    | Ube2h         | 75553  | 30178787 | 30178987 |
| 6 | 30316384 | 30341021 - | NM_001311086 | Zc3hc1        | -3114  | 30344135 | 30344335 |
| 6 | 30316388 | 30341011 - | NM_172735    | Zc3hc1        | -3124  | 30344135 | 30344335 |
| 6 | 30351855 | 30405175 + | NM_001311087 | Klhdc10       | -7520  | 30344135 | 30344335 |
| 6 | 30351855 | 30405175 + | NM_029742    | Klhdc10       | -7520  | 30344135 | 30344335 |
| 6 | 30410985 | 30413314 + | NR_131049    | 1700012C14Rik | 2395   | 30413380 | 30413580 |
| 6 | 30491642 | 30514474 + | NM_001024698 | Cpa2          | 22063  | 30513705 | 30513905 |
| 6 | 30518376 | 30541748 + | NM_027926    | Cpa4          | -4471  | 30513705 | 30513905 |
| 6 | 30589221 | 30595362 + | NM_025350    | Cpa1          | 4469   | 30593690 | 30593890 |
| 6 | 30603457 | 30643750 - | NM_031998    | Cep41         | 34907  | 30608643 | 30608843 |
| 6 | 30603457 | 30643750 - | NR_130781    | Cep41         | 34907  | 30608643 | 30608843 |
| 6 | 31012660 | 31012748 - | NR_029744    | Mir29a        | -5994  | 31018742 | 31018942 |
| 6 | 31013023 | 31013094 - | NR_029532    | Mir29b-1      | -5648  | 31018742 | 31018942 |
| 6 | 31043563 | 31168475 - | NR_110471    | Lincpint      | 69159  | 31099116 | 31099316 |
| 6 | 31043563 | 31168475 - | NR_110471    | Lincpint      | 48840  | 31119435 | 31119635 |
| 6 | 31115523 | 31168475 - | NR_110469    | Lincpint      | 48840  | 31119435 | 31119635 |
| 6 | 31115523 | 31168475 - | NR_110470    | Lincpint      | 48840  | 31119435 | 31119635 |
| 6 | 31316885 | 31348774 - | NR_040300    | Mkln1os       | 311    | 31348263 | 31348463 |
| 6 | 31348828 | 31459478 + | NM_013791    | Mkln1         | -365   | 31348263 | 31348463 |
| 6 | 32742227 | 33010153 - | NM_025336    | Chchd3        | 31735  | 32978218 | 32978418 |
| 6 | 33199150 | 33922931 + | NM_009148    | Exoc4         | 514838 | 33713988 | 33714188 |
| 6 | 33199150 | 33922931 + | NM_009148    | Exoc4         | 126956 | 33326106 | 33326306 |
| 6 | 34105879 | 34127055 - | NM_021435    | Slc35b4       | 20636  | 34106219 | 34106419 |
| 6 | 34253930 | 34267490 - | NM_009658    | Akr1b3        | -95    | 34267585 | 34267785 |

|   |          |            |              |               |       |          |          |
|---|----------|------------|--------------|---------------|-------|----------|----------|
| 6 | 34253930 | 34267490 - | NM_009658    | Akr1b3        | 12410 | 34254880 | 34255080 |
| 6 | 34253934 | 34267444 - | NR_037965    | Gm6644        | -141  | 34267585 | 34267785 |
| 6 | 34253934 | 34267444 - | NR_037965    | Gm6644        | 12364 | 34254880 | 34255080 |
| 6 | 34304164 | 34318455 + | NM_008012    | Akr1b8        | 1234  | 34305398 | 34305598 |
| 6 | 34362362 | 34373138 + | NM_009731    | Akr1b7        | -59   | 34362103 | 34362303 |
| 6 | 34830426 | 34860832 - | NM_001013366 | Wdr91         | -3374 | 34864206 | 34864406 |
| 6 | 34870960 | 34889343 + | NM_009292    | Stra8         | -6554 | 34864206 | 34864406 |
| 6 | 34972065 | 35083738 - | NM_001164412 | Cnot4         | 53898 | 35029640 | 35029840 |
| 6 | 34972065 | 35083738 - | NM_001164413 | Cnot4         | 53898 | 35029640 | 35029840 |
| 6 | 34972065 | 35083738 - | NM_001164414 | Cnot4         | 53898 | 35029640 | 35029840 |
| 6 | 34992707 | 35083738 - | NM_001164411 | Cnot4         | 53898 | 35029640 | 35029840 |
| 6 | 34992707 | 35083738 - | NM_016877    | Cnot4         | 53898 | 35029640 | 35029840 |
| 6 | 35217953 | 35258127 - | NM_172892    | Slc13a4       | 4225  | 35253702 | 35253902 |
| 6 | 35262746 | 35276142 - | NM_173375    | Fam180a       | 4774  | 35271168 | 35271368 |
| 6 | 35262746 | 35276142 - | NM_173375    | Fam180a       | -7568 | 35283710 | 35283910 |
| 6 | 35280846 | 35286830 + | NR_040526    | 1700065J11Rik | -9478 | 35271168 | 35271368 |
| 6 | 35280846 | 35286830 + | NR_040526    | 1700065J11Rik | 2864  | 35283710 | 35283910 |
| 6 | 37281021 | 37392149 - | NM_178661    | Creb3l2       | 34889 | 37357060 | 37357260 |
| 6 | 37281021 | 37392149 - | NM_178661    | Creb3l2       | 8931  | 37383018 | 37383218 |
| 6 | 37281021 | 37392149 - | NM_178661    | Creb3l2       | 33711 | 37358238 | 37358438 |
| 6 | 37281021 | 37392149 - | NM_178661    | Creb3l2       | 53344 | 37338605 | 37338805 |
| 6 | 37281021 | 37392149 - | NM_178661    | Creb3l2       | 43867 | 37348082 | 37348282 |
| 6 | 37281021 | 37392149 - | NM_178661    | Creb3l2       | 44568 | 37347381 | 37347581 |
| 6 | 37820811 | 37918446 + | NM_001272064 | Trim24        | 813   | 37821624 | 37821824 |
| 6 | 37820811 | 37918446 + | NM_145076    | Trim24        | 813   | 37821624 | 37821824 |
| 6 | 38260497 | 38304604 - | NM_028421    | Zc3hav1       | 8558  | 38295846 | 38296046 |
| 6 | 38265672 | 38304604 - | NM_028864    | Zc3hav1       | 8558  | 38295846 | 38296046 |
| 6 | 38484861 | 38489450 + | NM_025363    | 1110001J03Rik | -686  | 38483975 | 38484175 |
| 6 | 38501334 | 38559471 + | NM_001311099 | Luc7l2        | 25790 | 38527124 | 38527324 |
| 6 | 38501334 | 38559471 + | NM_001311099 | Luc7l2        | 49230 | 38550564 | 38550764 |



|   |          |            |              |          |        |          |          |
|---|----------|------------|--------------|----------|--------|----------|----------|
| 6 | 38501334 | 38557213 + | NM_001311100 | Luc7l2   | 25790  | 38527124 | 38527324 |
| 6 | 38501334 | 38557213 + | NM_001311100 | Luc7l2   | 49230  | 38550564 | 38550764 |
| 6 | 38501444 | 38559471 + | NM_001170848 | Luc7l2   | 25680  | 38527124 | 38527324 |
| 6 | 38501444 | 38559471 + | NM_001170848 | Luc7l2   | 49120  | 38550564 | 38550764 |
| 6 | 38501444 | 38557156 + | NM_001170849 | Luc7l2   | 25680  | 38527124 | 38527324 |
| 6 | 38501444 | 38557156 + | NM_001170849 | Luc7l2   | 49120  | 38550564 | 38550764 |
| 6 | 38501444 | 38559471 + | NM_138680    | Luc7l2   | 25680  | 38527124 | 38527324 |
| 6 | 38501444 | 38559471 + | NM_138680    | Luc7l2   | 49120  | 38550564 | 38550764 |
| 6 | 38647839 | 38787311 - | NM_001136065 | Hipk2    | 9732   | 38777379 | 38777579 |
| 6 | 38647839 | 38826190 - | NM_001294143 | Hipk2    | 48611  | 38777379 | 38777579 |
| 6 | 38647839 | 38826190 - | NM_001294143 | Hipk2    | -6974  | 38833164 | 38833364 |
| 6 | 38647839 | 38826190 - | NM_001294144 | Hipk2    | 48611  | 38777379 | 38777579 |
| 6 | 38647839 | 38826190 - | NM_001294144 | Hipk2    | -6974  | 38833164 | 38833364 |
| 6 | 38647839 | 38826190 - | NM_010433    | Hipk2    | 48611  | 38777379 | 38777579 |
| 6 | 38647839 | 38826190 - | NM_010433    | Hipk2    | -6974  | 38833164 | 38833364 |
| 6 | 38868985 | 39034579 + | NM_011539    | Tbxas1   | 5232   | 38874217 | 38874417 |
| 6 | 38868985 | 39034579 + | NM_011539    | Tbxas1   | -7859  | 38860926 | 38861126 |
| 6 | 39086619 | 39156773 - | NM_001033430 | Kdm7a    | 37301  | 39119272 | 39119472 |
| 6 | 39284770 | 39327707 - | NM_028123    | Slc37a3  | 35675  | 39291832 | 39292032 |
| 6 | 39347816 | 39369776 - | NM_001311109 | Mkrn1    | -7996  | 39377772 | 39377972 |
| 6 | 39347820 | 39370369 - | NM_018810    | Mkrn1    | -7403  | 39377772 | 39377972 |
| 6 | 39412377 | 39507834 - | NM_172477    | Dennd2a  | -4903  | 39512737 | 39512937 |
| 6 | 39553237 | 39675463 - | NM_139294    | Braf     | 36027  | 39639236 | 39639436 |
| 6 | 40060252 | 40198353 + | NM_001004182 | Tmem178b | 127145 | 40187397 | 40187597 |
| 6 | 40578830 | 40719123 + | NM_001171003 | Mgam     | 15463  | 40594293 | 40594493 |
| 6 | 40578830 | 40719123 + | NM_001171003 | Mgam     | 32117  | 40610947 | 40611147 |
| 6 | 40578830 | 40719123 + | NM_001171003 | Mgam     | 136388 | 40715218 | 40715418 |
| 6 | 40578830 | 40719123 + | NM_001171003 | Mgam     | 17282  | 40596112 | 40596312 |
| 6 | 40578830 | 40719123 + | NM_001171003 | Mgam     | 16642  | 40595472 | 40595672 |
| 6 | 40578830 | 40719123 + | NM_001171003 | Mgam     | 12262  | 40591092 | 40591292 |

|   |          |            |              |               |         |          |          |
|---|----------|------------|--------------|---------------|---------|----------|----------|
| 6 | 40578830 | 40719123 + | NM_001171003 | Mgam          | -61     | 40578569 | 40578769 |
| 6 | 42236684 | 42264656 + | NM_013491    | Clcn1         | -603    | 42235881 | 42236081 |
| 6 | 43295000 | 43616278 - | NM_001311111 | Tpk1          | 127084  | 43488994 | 43489194 |
| 6 | 43295000 | 43616278 - | NM_013861    | Tpk1          | 127084  | 43488994 | 43489194 |
| 6 | 45010060 | 47251371 + | NM_001004357 | Cntnap2       | 1121969 | 46132029 | 46132229 |
| 6 | 45010060 | 47251371 + | NM_001004357 | Cntnap2       | 2159377 | 47169437 | 47169637 |
| 6 | 45010060 | 47251371 + | NM_001004357 | Cntnap2       | 1860082 | 46870142 | 46870342 |
| 6 | 47480273 | 47545030 - | NM_001146689 | Ezh2          | 4464    | 47540366 | 47540566 |
| 6 | 47480273 | 47545030 - | NM_007971    | Ezh2          | 4464    | 47540366 | 47540566 |
| 6 | 47870567 | 47882637 + | NM_001145881 | Zfp212        | -1298   | 47869069 | 47869269 |
| 6 | 47870567 | 47882637 + | NM_001145881 | Zfp212        | -3254   | 47867113 | 47867313 |
| 6 | 47870567 | 47882637 + | NM_145576    | Zfp212        | -1298   | 47869069 | 47869269 |
| 6 | 47870567 | 47882637 + | NM_145576    | Zfp212        | -3254   | 47867113 | 47867313 |
| 6 | 48012394 | 48036593 - | NM_001163475 | Zfp746        | 7177    | 48029216 | 48029416 |
| 6 | 48012394 | 48036593 - | NM_001163475 | Zfp746        | 8588    | 48027805 | 48028005 |
| 6 | 48486581 | 48487474 - | NR_130985    | 1700026J14Rik | -5364   | 48492838 | 48493038 |
| 6 | 48845254 | 48859187 + | NM_029638    | Aoc1          | 277     | 48845531 | 48845731 |
| 6 | 48854985 | 48859187 + | NM_001161621 | Aoc1          | -9254   | 48845531 | 48845731 |
| 6 | 48854985 | 48859187 + | NM_001161622 | Aoc1          | -9254   | 48845531 | 48845731 |
| 6 | 49035217 | 49164954 - | NM_023670    | Igf2bp3       | 76125   | 49088629 | 49088829 |
| 6 | 49193920 | 49214052 - | NM_198102    | Tra2a         | -3564   | 49217616 | 49217816 |
| 6 | 49345603 | 49419502 + | NM_029916    | Stk31         | 2089    | 49347692 | 49347892 |
| 6 | 50157402 | 50211769 - | NM_018769    | Dfna5         | 21597   | 50189972 | 50190172 |
| 6 | 50157402 | 50211769 - | NM_018769    | Dfna5         | -1951   | 50213720 | 50213920 |
| 6 | 50157402 | 50211769 - | NM_018769    | Dfna5         | 17455   | 50194114 | 50194314 |
| 6 | 50243326 | 50406170 - | NM_001163645 | Osbp13        | 97568   | 50308402 | 50308602 |
| 6 | 50243326 | 50406170 - | NM_001163645 | Osbp13        | 5501    | 50400469 | 50400669 |
| 6 | 50243326 | 50406170 - | NM_001163645 | Osbp13        | -4450   | 50410620 | 50410820 |
| 6 | 50243326 | 50406170 - | NM_001163645 | Osbp13        | 896     | 50405074 | 50405274 |
| 6 | 50243326 | 50406170 - | NM_001163645 | Osbp13        | 79842   | 50326128 | 50326328 |

|   |          |            |              |               |        |          |          |
|---|----------|------------|--------------|---------------|--------|----------|----------|
| 6 | 50243326 | 50406170 - | NM_001163645 | Osbp13        | 56435  | 50349535 | 50349735 |
| 6 | 50243326 | 50406170 - | NM_001163645 | Osbp13        | 65328  | 50340642 | 50340842 |
| 6 | 50243326 | 50406170 - | NM_001163645 | Osbp13        | 91562  | 50314408 | 50314608 |
| 6 | 50243326 | 50406170 - | NM_001163645 | Osbp13        | 87369  | 50318601 | 50318801 |
| 6 | 50243326 | 50406170 - | NM_001163645 | Osbp13        | 92916  | 50313054 | 50313254 |
| 6 | 50243326 | 50332837 - | NM_027881    | Osbp13        | 24235  | 50308402 | 50308602 |
| 6 | 50243326 | 50332837 - | NM_027881    | Osbp13        | 6509   | 50326128 | 50326328 |
| 6 | 50243326 | 50332837 - | NM_027881    | Osbp13        | -7805  | 50340642 | 50340842 |
| 6 | 50243326 | 50332837 - | NM_027881    | Osbp13        | 18229  | 50314408 | 50314608 |
| 6 | 50243326 | 50332837 - | NM_027881    | Osbp13        | 14036  | 50318601 | 50318801 |
| 6 | 50243326 | 50332837 - | NM_027881    | Osbp13        | 19583  | 50313054 | 50313254 |
| 6 | 50523303 | 50546590 - | NM_027564    | 4921507P07Rik | -5333  | 50551923 | 50552123 |
| 6 | 51329709 | 51342791 + | NR_110455    | Gm6559        | 1575   | 51331284 | 51331484 |
| 6 | 51473902 | 51540670 + | NM_001127349 | Snx10         | 56404  | 51530306 | 51530506 |
| 6 | 51473902 | 51540670 + | NM_001127349 | Snx10         | -9918  | 51463784 | 51463984 |
| 6 | 51494522 | 51540670 + | NM_001127348 | Snx10         | 35784  | 51530306 | 51530506 |
| 6 | 51494522 | 51540670 + | NM_028035    | Snx10         | 35784  | 51530306 | 51530506 |
| 6 | 51809164 | 51962549 - | NM_018773    | Skap2         | 56222  | 51906127 | 51906327 |
| 6 | 52052948 | 52063684 + | NR_110440    | Halr1         | 10214  | 52063162 | 52063362 |
| 6 | 52442445 | 52450080 + | NR_046049    | 1700094M24Rik | -9990  | 52432255 | 52432455 |
| 6 | 52496224 | 52590295 - | NM_145567    | Hibadh        | 90310  | 52499785 | 52499985 |
| 6 | 52663723 | 52716774 + | NM_025816    | Tax1bp1       | -8137  | 52655386 | 52655586 |
| 6 | 52718062 | 52859615 - | NM_001168277 | Jazf1         | 23280  | 52836135 | 52836335 |
| 6 | 52718062 | 53018619 - | NM_173406    | Jazf1         | 182284 | 52836135 | 52836335 |
| 6 | 52718062 | 53018619 - | NM_173406    | Jazf1         | 96084  | 52922335 | 52922535 |
| 6 | 53823273 | 53928668 - | NM_001289713 | Cpvl          | 38545  | 53889923 | 53890123 |
| 6 | 53823273 | 53928668 - | NM_001289714 | Cpvl          | 38545  | 53889923 | 53890123 |
| 6 | 53823273 | 53928668 - | NM_027749    | Cpvl          | 38545  | 53889923 | 53890123 |
| 6 | 53989926 | 54251807 + | NM_001163640 | Chn2          | 85744  | 54075670 | 54075870 |
| 6 | 53989926 | 54251807 + | NM_001163640 | Chn2          | 222047 | 54211973 | 54212173 |

|   |          |            |              |               |        |          |          |
|---|----------|------------|--------------|---------------|--------|----------|----------|
| 6 | 53989926 | 54251807 + | NM_001163640 | Chn2          | 250131 | 54240057 | 54240257 |
| 6 | 53989926 | 54251807 + | NM_001163640 | Chn2          | 240379 | 54230305 | 54230505 |
| 6 | 53989926 | 54251807 + | NM_001163640 | Chn2          | 141928 | 54131854 | 54132054 |
| 6 | 53989926 | 54251807 + | NM_001163640 | Chn2          | 198189 | 54188115 | 54188315 |
| 6 | 53989926 | 54251807 + | NM_001163640 | Chn2          | 192282 | 54182208 | 54182408 |
| 6 | 53989926 | 54251807 + | NM_001163640 | Chn2          | 118223 | 54108149 | 54108349 |
| 6 | 53989926 | 54251807 + | NM_001163640 | Chn2          | 131264 | 54121190 | 54121390 |
| 6 | 53989926 | 54251807 + | NM_001163640 | Chn2          | 105166 | 54095092 | 54095292 |
| 6 | 53989926 | 54251807 + | NM_001163640 | Chn2          | 77730  | 54067656 | 54067856 |
| 6 | 53989926 | 54251807 + | NM_001163640 | Chn2          | 82670  | 54072596 | 54072796 |
| 6 | 53989926 | 54251807 + | NM_001163640 | Chn2          | 79103  | 54069029 | 54069229 |
| 6 | 53989926 | 54251807 + | NM_001163640 | Chn2          | 47669  | 54037595 | 54037795 |
| 6 | 53989926 | 54251807 + | NM_001163640 | Chn2          | 31112  | 54021038 | 54021238 |
| 6 | 54214852 | 54251807 + | NM_001311133 | Chn2          | -2679  | 54211973 | 54212173 |
| 6 | 54214852 | 54251807 + | NM_001311133 | Chn2          | 25205  | 54240057 | 54240257 |
| 6 | 54214852 | 54251807 + | NM_001311133 | Chn2          | 15453  | 54230305 | 54230505 |
| 6 | 54219150 | 54251807 + | NM_001311134 | Chn2          | -6977  | 54211973 | 54212173 |
| 6 | 54219150 | 54251807 + | NM_001311134 | Chn2          | 20907  | 54240057 | 54240257 |
| 6 | 54219150 | 54251807 + | NM_001311134 | Chn2          | 11155  | 54230305 | 54230505 |
| 6 | 54219675 | 54380216 - | NR_033635    | 9130019P16Rik | 76513  | 54303503 | 54303703 |
| 6 | 54219675 | 54380216 - | NR_033635    | 9130019P16Rik | 45109  | 54334907 | 54335107 |
| 6 | 54219675 | 54380216 - | NR_033635    | 9130019P16Rik | 61590  | 54318426 | 54318626 |
| 6 | 54219675 | 54380216 - | NR_033635    | 9130019P16Rik | 83629  | 54296387 | 54296587 |
| 6 | 54219675 | 54380216 - | NR_033635    | 9130019P16Rik | 78154  | 54301862 | 54302062 |
| 6 | 54219675 | 54380216 - | NR_033635    | 9130019P16Rik | 81952  | 54298064 | 54298264 |
| 6 | 54219675 | 54380216 - | NR_033635    | 9130019P16Rik | 139959 | 54240057 | 54240257 |
| 6 | 54219675 | 54380216 - | NR_033635    | 9130019P16Rik | 98123  | 54281893 | 54282093 |
| 6 | 54219675 | 54380216 - | NR_033635    | 9130019P16Rik | 149711 | 54230305 | 54230505 |
| 6 | 54222816 | 54251807 + | NM_023543    | Chn2          | 17241  | 54240057 | 54240257 |
| 6 | 54222816 | 54251807 + | NM_023543    | Chn2          | 7489   | 54230305 | 54230505 |

|   |          |            |              |           |       |          |          |
|---|----------|------------|--------------|-----------|-------|----------|----------|
| 6 | 54402877 | 54453763 + | NM_001167860 | Wipf3     | 28811 | 54431688 | 54431888 |
| 6 | 54402877 | 54453763 + | NM_001167860 | Wipf3     | 22874 | 54425751 | 54425951 |
| 6 | 54402877 | 54453763 + | NM_001167860 | Wipf3     | 25334 | 54428211 | 54428411 |
| 6 | 54402877 | 54453763 + | NM_001167860 | Wipf3     | 24507 | 54427384 | 54427584 |
| 6 | 54402877 | 54453763 + | NM_001167860 | Wipf3     | 20561 | 54423438 | 54423638 |
| 6 | 54402877 | 54453763 + | NM_001167861 | Wipf3     | 28811 | 54431688 | 54431888 |
| 6 | 54402877 | 54453763 + | NM_001167861 | Wipf3     | 22874 | 54425751 | 54425951 |
| 6 | 54402877 | 54453763 + | NM_001167861 | Wipf3     | 25334 | 54428211 | 54428411 |
| 6 | 54402877 | 54453763 + | NM_001167861 | Wipf3     | 24507 | 54427384 | 54427584 |
| 6 | 54402877 | 54453763 + | NM_001167861 | Wipf3     | 20561 | 54423438 | 54423638 |
| 6 | 54766910 | 54840219 + | NM_199143    | Znrf2     | 35042 | 54801952 | 54802152 |
| 6 | 54935089 | 54942862 - | NM_026637    | Ggct      | 1331  | 54941331 | 54941531 |
| 6 | 54987995 | 55029499 + | NM_180678    | Gars      | -8598 | 54979197 | 54979397 |
| 6 | 55286293 | 55298550 + | NM_007472    | Aqp1      | 3230  | 55289523 | 55289723 |
| 6 | 55401972 | 55451450 + | NM_001025372 | Adcyap1r1 | 38077 | 55440049 | 55440249 |
| 6 | 55401972 | 55451450 + | NM_007407    | Adcyap1r1 | 38077 | 55440049 | 55440249 |
| 6 | 56727519 | 56747808 - | NM_145958    | Kbtbd2    | -253  | 56748061 | 56748261 |
| 6 | 56727519 | 56747808 - | NM_145958    | Kbtbd2    | 15167 | 56732441 | 56732641 |
| 6 | 56782053 | 56829355 + | NM_012056    | Fkbp9     | 12416 | 56794469 | 56794669 |
| 6 | 56782053 | 56829355 + | NM_012056    | Fkbp9     | 44928 | 56826981 | 56827181 |
| 6 | 56832395 | 56851881 - | NM_001252374 | Nt5c3     | 6667  | 56845014 | 56845214 |
| 6 | 56832395 | 56873927 - | NM_026004    | Nt5c3     | 2913  | 56870814 | 56871014 |
| 6 | 56832395 | 56873927 - | NM_026004    | Nt5c3     | 28713 | 56845014 | 56845214 |
| 6 | 56832395 | 56873927 - | NM_026004    | Nt5c3     | 10040 | 56863687 | 56863887 |
| 6 | 57702258 | 57775120 - | NM_146168    | Vopp1     | 55581 | 57719339 | 57719539 |
| 6 | 57702258 | 57775120 - | NM_146168    | Vopp1     | 44461 | 57730459 | 57730659 |
| 6 | 57702258 | 57775120 - | NM_146168    | Vopp1     | 44878 | 57730042 | 57730242 |
| 6 | 57702258 | 57775120 - | NM_146168    | Vopp1     | 57761 | 57717159 | 57717359 |
| 6 | 58546666 | 58642446 + | NM_011920    | Abcg2     | 32483 | 58579149 | 58579349 |
| 6 | 58546666 | 58642446 + | NM_011920    | Abcg2     | 47247 | 58593913 | 58594113 |

|   |          |            |              |               |        |          |          |
|---|----------|------------|--------------|---------------|--------|----------|----------|
| 6 | 58546666 | 58642446 + | NM_011920    | Abcg2         | 37015  | 58583681 | 58583881 |
| 6 | 58546666 | 58642446 + | NM_011920    | Abcg2         | 13263  | 58559929 | 58560129 |
| 6 | 58883530 | 58974497 - | NM_153574    | Fam13a        | 19569  | 58954728 | 58954928 |
| 6 | 58883530 | 58974497 - | NM_153574    | Fam13a        | 9908   | 58964389 | 58964589 |
| 6 | 58883530 | 58974497 - | NM_153574    | Fam13a        | 56008  | 58918289 | 58918489 |
| 6 | 58883530 | 58974497 - | NM_153574    | Fam13a        | 46448  | 58927849 | 58928049 |
| 6 | 58883530 | 58974497 - | NM_153574    | Fam13a        | 51361  | 58922936 | 58923136 |
| 6 | 59302455 | 59376285 - | NM_183183    | Gprin3        | 0      | 59376174 | 59376374 |
| 6 | 59302455 | 59376285 - | NM_183183    | Gprin3        | 243    | 59375842 | 59376042 |
| 6 | 60894311 | 60939373 + | NM_001163507 | Mmrn1         | 34859  | 60929170 | 60929370 |
| 6 | 60894311 | 60939373 + | NM_001163507 | Mmrn1         | 38666  | 60932977 | 60933177 |
| 6 | 60894311 | 60939373 + | NM_027613    | Mmrn1         | 34859  | 60929170 | 60929370 |
| 6 | 60894311 | 60939373 + | NM_027613    | Mmrn1         | 38666  | 60932977 | 60933177 |
| 6 | 61125598 | 61130805 - | NR_040287    | A730020E08Rik | -3704  | 61134509 | 61134709 |
| 6 | 61130319 | 62332858 + | NM_001164316 | Ccser1        | 570295 | 61700614 | 61700814 |
| 6 | 61130319 | 62332858 + | NM_001164316 | Ccser1        | 66309  | 61196628 | 61196828 |
| 6 | 61130319 | 62332858 + | NM_001164316 | Ccser1        | 378953 | 61509272 | 61509472 |
| 6 | 61130319 | 62332858 + | NM_001164316 | Ccser1        | 4190   | 61134509 | 61134709 |
| 6 | 61130319 | 62332858 + | NM_183310    | Ccser1        | 570295 | 61700614 | 61700814 |
| 6 | 61130319 | 62332858 + | NM_183310    | Ccser1        | 66309  | 61196628 | 61196828 |
| 6 | 61130319 | 62332858 + | NM_183310    | Ccser1        | 378953 | 61509272 | 61509472 |
| 6 | 61130319 | 62332858 + | NM_183310    | Ccser1        | 4190   | 61134509 | 61134709 |
| 6 | 65067287 | 65094725 - | NM_019455    | Hpgds         | 3337   | 65091188 | 65091388 |
| 6 | 66846391 | 66971356 + | NM_001177556 | Gng12         | 9901   | 66856292 | 66856492 |
| 6 | 66846391 | 66971356 + | NM_001177556 | Gng12         | 51881  | 66898272 | 66898472 |
| 6 | 66846391 | 66971356 + | NM_001177556 | Gng12         | 117718 | 66964109 | 66964309 |
| 6 | 66846391 | 66971356 + | NM_001177556 | Gng12         | 62269  | 66908660 | 66908860 |
| 6 | 66846391 | 66971356 + | NM_001177556 | Gng12         | 12218  | 66858609 | 66858809 |
| 6 | 66846391 | 66971356 + | NM_001177556 | Gng12         | 10663  | 66857054 | 66857254 |
| 6 | 66846391 | 66971356 + | NM_001177556 | Gng12         | 4395   | 66850786 | 66850986 |

|   |          |            |              |       |        |          |          |
|---|----------|------------|--------------|-------|--------|----------|----------|
| 6 | 66846391 | 66971356 + | NM_001177557 | Gng12 | 9901   | 66856292 | 66856492 |
| 6 | 66846391 | 66971356 + | NM_001177557 | Gng12 | 51881  | 66898272 | 66898472 |
| 6 | 66846391 | 66971356 + | NM_001177557 | Gng12 | 117718 | 66964109 | 66964309 |
| 6 | 66846391 | 66971356 + | NM_001177557 | Gng12 | 62269  | 66908660 | 66908860 |
| 6 | 66846391 | 66971356 + | NM_001177557 | Gng12 | 12218  | 66858609 | 66858809 |
| 6 | 66846391 | 66971356 + | NM_001177557 | Gng12 | 10663  | 66857054 | 66857254 |
| 6 | 66846391 | 66971356 + | NM_001177557 | Gng12 | 4395   | 66850786 | 66850986 |
| 6 | 66846391 | 66971356 + | NM_001177559 | Gng12 | 9901   | 66856292 | 66856492 |
| 6 | 66846391 | 66971356 + | NM_001177559 | Gng12 | 51881  | 66898272 | 66898472 |
| 6 | 66846391 | 66971356 + | NM_001177559 | Gng12 | 117718 | 66964109 | 66964309 |
| 6 | 66846391 | 66971356 + | NM_001177559 | Gng12 | 62269  | 66908660 | 66908860 |
| 6 | 66846391 | 66971356 + | NM_001177559 | Gng12 | 12218  | 66858609 | 66858809 |
| 6 | 66846391 | 66971356 + | NM_001177559 | Gng12 | 10663  | 66857054 | 66857254 |
| 6 | 66846391 | 66971356 + | NM_001177559 | Gng12 | 4395   | 66850786 | 66850986 |
| 6 | 66846391 | 66971356 + | NM_001177560 | Gng12 | 9901   | 66856292 | 66856492 |
| 6 | 66846391 | 66971356 + | NM_001177560 | Gng12 | 51881  | 66898272 | 66898472 |
| 6 | 66846391 | 66971356 + | NM_001177560 | Gng12 | 117718 | 66964109 | 66964309 |
| 6 | 66846391 | 66971356 + | NM_001177560 | Gng12 | 62269  | 66908660 | 66908860 |
| 6 | 66846391 | 66971356 + | NM_001177560 | Gng12 | 12218  | 66858609 | 66858809 |
| 6 | 66846391 | 66971356 + | NM_001177560 | Gng12 | 10663  | 66857054 | 66857254 |
| 6 | 66846391 | 66971356 + | NM_001177560 | Gng12 | 4395   | 66850786 | 66850986 |
| 6 | 66846391 | 66971356 + | NM_025278    | Gng12 | 9901   | 66856292 | 66856492 |
| 6 | 66846391 | 66971356 + | NM_025278    | Gng12 | 51881  | 66898272 | 66898472 |
| 6 | 66846391 | 66971356 + | NM_025278    | Gng12 | 117718 | 66964109 | 66964309 |
| 6 | 66846391 | 66971356 + | NM_025278    | Gng12 | 62269  | 66908660 | 66908860 |
| 6 | 66846391 | 66971356 + | NM_025278    | Gng12 | 12218  | 66858609 | 66858809 |
| 6 | 66846391 | 66971356 + | NM_025278    | Gng12 | 10663  | 66857054 | 66857254 |
| 6 | 66846391 | 66971356 + | NM_025278    | Gng12 | 4395   | 66850786 | 66850986 |
| 6 | 66846885 | 66971356 + | NM_001177558 | Gng12 | 9407   | 66856292 | 66856492 |
| 6 | 66846885 | 66971356 + | NM_001177558 | Gng12 | 51387  | 66898272 | 66898472 |

|   |          |            |              |               |        |          |          |
|---|----------|------------|--------------|---------------|--------|----------|----------|
| 6 | 66846885 | 66971356 + | NM_001177558 | Gng12         | 117224 | 66964109 | 66964309 |
| 6 | 66846885 | 66971356 + | NM_001177558 | Gng12         | 61775  | 66908660 | 66908860 |
| 6 | 66846885 | 66971356 + | NM_001177558 | Gng12         | 11724  | 66858609 | 66858809 |
| 6 | 66846885 | 66971356 + | NM_001177558 | Gng12         | 10169  | 66857054 | 66857254 |
| 6 | 66846885 | 66971356 + | NM_001177558 | Gng12         | 3901   | 66850786 | 66850986 |
| 6 | 66985090 | 66987402 - | NM_007836    | Gadd45a       | 0      | 66987378 | 66987578 |
| 6 | 66986593 | 67030647 + | NR_040278    | E230016M11Rik | 785    | 66987378 | 66987578 |
| 6 | 66986593 | 67030647 + | NR_040278    | E230016M11Rik | 25818  | 67012411 | 67012611 |
| 6 | 67242012 | 67326132 - | NM_008354    | Il12rb2       | 7082   | 67318850 | 67319050 |
| 6 | 70715714 | 70742170 - | NM_009075    | Rpia          | 1006   | 70740964 | 70741164 |
| 6 | 70715714 | 70742170 - | NM_009075    | Rpia          | 1916   | 70740054 | 70740254 |
| 6 | 70794521 | 70855235 + | NM_010121    | Eif2ak3       | -490   | 70793831 | 70794031 |
| 6 | 71078160 | 71094375 - | NM_001033929 | Thnsl2        | -1676  | 71096051 | 71096251 |
| 6 | 71078160 | 71094375 - | NM_178413    | Thnsl2        | -1676  | 71096051 | 71096251 |
| 6 | 71163934 | 71212276 - | NM_001160127 | Smyd1         | 14500  | 71197576 | 71197776 |
| 6 | 71163934 | 71212276 - | NM_001160127 | Smyd1         | -8581  | 71220857 | 71221057 |
| 6 | 71163934 | 71212276 - | NM_001160127 | Smyd1         | 29260  | 71182816 | 71183016 |
| 6 | 71163934 | 71212276 - | NM_009762    | Smyd1         | 14500  | 71197576 | 71197776 |
| 6 | 71163934 | 71212276 - | NM_009762    | Smyd1         | -8581  | 71220857 | 71221057 |
| 6 | 71163934 | 71212276 - | NM_009762    | Smyd1         | 29260  | 71182816 | 71183016 |
| 6 | 71221665 | 71221796 + | NR_106192    | Mir8112       | -608   | 71220857 | 71221057 |
| 6 | 71222013 | 71235314 + | NM_145568    | Krcc1         | -956   | 71220857 | 71221057 |
| 6 | 71538964 | 71582912 - | NM_001038695 | Kdm3a         | -248   | 71583160 | 71583360 |
| 6 | 71538964 | 71582681 - | NM_173001    | Kdm3a         | -479   | 71583160 | 71583360 |
| 6 | 71781314 | 71825261 + | NM_001253681 | Immt          | 19539  | 71800853 | 71801053 |
| 6 | 71781314 | 71825261 + | NM_001253686 | Immt          | 19539  | 71800853 | 71801053 |
| 6 | 71781314 | 71825261 + | NM_001253687 | Immt          | 19539  | 71800853 | 71801053 |
| 6 | 71781314 | 71825261 + | NM_001253688 | Immt          | 19539  | 71800853 | 71801053 |
| 6 | 71781314 | 71825261 + | NM_001253689 | Immt          | 19539  | 71800853 | 71801053 |
| 6 | 71781314 | 71825261 + | NM_029673    | Immt          | 19539  | 71800853 | 71801053 |



|   |          |            |              |         |       |          |          |
|---|----------|------------|--------------|---------|-------|----------|----------|
| 6 | 72047602 | 72104565 + | NM_001035228 | St3gal5 | 20041 | 72067643 | 72067843 |
| 6 | 72047602 | 72104565 + | NM_011375    | St3gal5 | 20041 | 72067643 | 72067843 |
| 6 | 72318043 | 72330463 - | NM_001080742 | Vamp5   | -9345 | 72339808 | 72340008 |
| 6 | 72318043 | 72330463 - | NM_016872    | Vamp5   | -9345 | 72339808 | 72340008 |
| 6 | 72335215 | 72340662 - | NM_016794    | Vamp8   | 654   | 72339808 | 72340008 |
| 6 | 72515916 | 72548408 - | NM_001253692 | Elmod3  | 14041 | 72534167 | 72534367 |
| 6 | 72515916 | 72548408 - | NM_001253692 | Elmod3  | -3431 | 72551839 | 72552039 |
| 6 | 72515916 | 72548408 - | NM_001253692 | Elmod3  | 23743 | 72524465 | 72524665 |
| 6 | 72515916 | 72548408 - | NM_144917    | Elmod3  | 14041 | 72534167 | 72534367 |
| 6 | 72515916 | 72548408 - | NM_144917    | Elmod3  | -3431 | 72551839 | 72552039 |
| 6 | 72515916 | 72548408 - | NM_144917    | Elmod3  | 23743 | 72524465 | 72524665 |
| 6 | 72548622 | 72557483 + | NM_026159    | Retsat  | 3217  | 72551839 | 72552039 |
| 6 | 72558415 | 72566995 - | NM_009443    | Tgoln1  | -3194 | 72570189 | 72570389 |
| 6 | 72560951 | 72566743 - | NM_009444    | Tgoln2  | -3446 | 72570189 | 72570389 |
| 6 | 72579282 | 72587712 + | NR_040422    | Gm15401 | -8893 | 72570189 | 72570389 |
| 6 | 72579825 | 72587712 + | NR_040421    | Gm15401 | -9436 | 72570189 | 72570389 |
| 6 | 73198499 | 73226902 + | NM_019879    | Suclg1  | -540  | 73197759 | 73197959 |
| 6 | 78320879 | 78323461 + | NM_011036    | Reg3b   | -8631 | 78312048 | 78312248 |
| 6 | 78330703 | 78333834 + | NM_011259    | Reg3a   | -5490 | 78325013 | 78325213 |
| 6 | 79968871 | 80760138 + | NM_001134743 | Lrrtm4  | 37643 | 80006514 | 80006714 |
| 6 | 82675021 | 82724449 - | NM_013820    | Hk2     | -1613 | 82726062 | 82726262 |
| 6 | 82675021 | 82724449 - | NM_013820    | Hk2     | -2702 | 82727151 | 82727351 |
| 6 | 82675021 | 82724449 - | NM_013820    | Hk2     | 10140 | 82714109 | 82714309 |
| 6 | 82675021 | 82724449 - | NM_013820    | Hk2     | 1871  | 82722378 | 82722578 |
| 6 | 82675021 | 82724449 - | NM_013820    | Hk2     | 5813  | 82718436 | 82718636 |
| 6 | 82675021 | 82724449 - | NM_013820    | Hk2     | 20501 | 82703748 | 82703948 |
| 6 | 82675021 | 82724449 - | NM_013820    | Hk2     | 17500 | 82706749 | 82706949 |
| 6 | 82675021 | 82724449 - | NM_013820    | Hk2     | 27002 | 82697247 | 82697447 |
| 6 | 82896916 | 82980304 + | NM_033079    | M1ap    | 68314 | 82965230 | 82965430 |
| 6 | 83018319 | 83020220 - | NM_009392    | Tlx2    | -8113 | 83028333 | 83028533 |

|   |          |            |              |               |        |          |          |
|---|----------|------------|--------------|---------------|--------|----------|----------|
| 6 | 83028384 | 83030850 + | NM_197992    | Pcgf1         | 0      | 83028333 | 83028533 |
| 6 | 83036359 | 83038236 + | NM_010692    | Lbx2          | -7826  | 83028333 | 83028533 |
| 6 | 83051510 | 83059116 + | NM_001081266 | Ccdc142       | 1732   | 83053242 | 83053442 |
| 6 | 83059102 | 83059927 + | NM_026744    | Mrpl53        | -5660  | 83053242 | 83053442 |
| 6 | 83069038 | 83071456 - | NM_001083922 | Wbp1          | 199    | 83071057 | 83071257 |
| 6 | 83069038 | 83071456 - | NM_001083923 | Wbp1          | 199    | 83071057 | 83071257 |
| 6 | 83069038 | 83071456 - | NM_016757    | Wbp1          | 199    | 83071057 | 83071257 |
| 6 | 83299478 | 83308387 + | NM_175277    | Bola3         | 7243   | 83306721 | 83306921 |
| 6 | 83312368 | 83391673 - | NM_183138    | Tet3          | 19013  | 83372460 | 83372660 |
| 6 | 83312368 | 83391673 - | NM_183138    | Tet3          | 19422  | 83372051 | 83372251 |
| 6 | 83693011 | 83708805 + | NM_134157    | Atp6v1b1      | 304    | 83693315 | 83693515 |
| 6 | 83720408 | 83725807 - | NM_009357    | Tex261        | -381   | 83726188 | 83726388 |
| 6 | 83745051 | 83752551 + | NM_019542    | Nagk          | 477    | 83745528 | 83745728 |
| 6 | 83745152 | 83752551 + | NM_001164187 | Nagk          | 376    | 83745528 | 83745728 |
| 6 | 83958592 | 84161054 + | NM_001077694 | Dysf          | 86599  | 84045191 | 84045391 |
| 6 | 83969380 | 84161054 + | NM_001310152 | Dysf          | 75811  | 84045191 | 84045391 |
| 6 | 83969380 | 84161054 + | NM_021469    | Dysf          | 75811  | 84045191 | 84045391 |
| 6 | 84568480 | 85019508 - | NM_177077    | Exoc6b        | 196062 | 84823246 | 84823446 |
| 6 | 84568480 | 85019508 - | NM_177077    | Exoc6b        | 181141 | 84838167 | 84838367 |
| 6 | 84568480 | 85019508 - | NM_177077    | Exoc6b        | 182600 | 84836708 | 84836908 |
| 6 | 84568480 | 85019508 - | NM_177077    | Exoc6b        | 371639 | 84647669 | 84647869 |
| 6 | 85284956 | 85324629 - | NM_001003955 | Rab11fip5     | 8002   | 85316427 | 85316627 |
| 6 | 85284956 | 85324629 - | NM_177466    | Rab11fip5     | 8002   | 85316427 | 85316627 |
| 6 | 85419570 | 85452989 - | NM_001001160 | Fbxo41        | 2287   | 85450502 | 85450702 |
| 6 | 85419570 | 85452989 - | NM_001289674 | Fbxo41        | 2287   | 85450502 | 85450702 |
| 6 | 85419570 | 85452989 - | NM_001289675 | Fbxo41        | 2287   | 85450502 | 85450702 |
| 6 | 85780381 | 85781885 - | NM_023455    | Nat8          | 0      | 85781730 | 85781930 |
| 6 | 85849044 | 85854933 - | NM_029331    | 1700019G17Rik | 2421   | 85852312 | 85852512 |
| 6 | 85849044 | 85854933 - | NM_029331    | 1700019G17Rik | 3535   | 85851198 | 85851398 |
| 6 | 85849045 | 85852528 - | NM_001145895 | 1700019G17Rik | 16     | 85852312 | 85852512 |

|   |          |            |              |               |       |          |          |
|---|----------|------------|--------------|---------------|-------|----------|----------|
| 6 | 85849045 | 85852528 - | NM_001145895 | 1700019G17Rik | 1130  | 85851198 | 85851398 |
| 6 | 85860148 | 85865672 - | NM_023160    | Cml1          | -595  | 85866267 | 85866467 |
| 6 | 85865713 | 85880279 + | NM_001170488 | Tprkb         | 554   | 85866267 | 85866467 |
| 6 | 85865713 | 85880279 + | NM_001170488 | Tprkb         | 13553 | 85879266 | 85879466 |
| 6 | 85865713 | 85880279 + | NM_176842    | Tprkb         | 554   | 85866267 | 85866467 |
| 6 | 85865713 | 85880279 + | NM_176842    | Tprkb         | 13553 | 85879266 | 85879466 |
| 6 | 85978675 | 86074404 + | NM_001271857 | Add2          | -7119 | 85971356 | 85971556 |
| 6 | 85978675 | 86074404 + | NM_001271858 | Add2          | -7119 | 85971356 | 85971556 |
| 6 | 85978675 | 86059462 + | NM_001271860 | Add2          | -7119 | 85971356 | 85971556 |
| 6 | 86145245 | 86225444 + | NM_031199    | Tgfa          | 24363 | 86169608 | 86169808 |
| 6 | 86315677 | 86320053 + | NM_025591    | Fam136a       | 486   | 86316163 | 86316363 |
| 6 | 86315677 | 86320053 + | NM_025591    | Fam136a       | -644  | 86314833 | 86315033 |
| 6 | 86321534 | 86328897 + | NM_026506    | Snrpg         | -5171 | 86316163 | 86316363 |
| 6 | 86321534 | 86328897 + | NM_026506    | Snrpg         | -6501 | 86314833 | 86315033 |
| 6 | 86477324 | 86514444 + | NR_037960    | 1600020E01Rik | 20504 | 86497828 | 86498028 |
| 6 | 86477395 | 86514444 + | NR_037961    | 1600020E01Rik | 20433 | 86497828 | 86498028 |
| 6 | 86597039 | 86619154 - | NM_010751    | Mxd1          | 2814  | 86616140 | 86616340 |
| 6 | 86597039 | 86619154 - | NM_010751    | Mxd1          | 13966 | 86604988 | 86605188 |
| 6 | 86641762 | 86683373 - | NM_011818    | Gmcl1         | 25007 | 86658166 | 86658366 |
| 6 | 86686834 | 86743579 - | NM_013471    | Anxa4         | 26016 | 86717363 | 86717563 |
| 6 | 86686834 | 86743579 - | NM_013471    | Anxa4         | 18323 | 86725056 | 86725256 |
| 6 | 86686834 | 86743579 - | NM_013471    | Anxa4         | 19555 | 86723824 | 86724024 |
| 6 | 86686834 | 86743579 - | NM_013471    | Anxa4         | 39165 | 86704214 | 86704414 |
| 6 | 86686834 | 86743579 - | NM_013471    | Anxa4         | 31767 | 86711612 | 86711812 |
| 6 | 86686834 | 86743579 - | NM_013471    | Anxa4         | 40460 | 86702919 | 86703119 |
| 6 | 86992840 | 87042202 + | NM_013528    | Gfpt1         | -1579 | 86991061 | 86991261 |
| 6 | 86992840 | 87042202 + | NM_013528    | Gfpt1         | 30010 | 87022850 | 87023050 |
| 6 | 87408539 | 87483254 - | NM_001037727 | Arhgap25      | 10620 | 87472434 | 87472634 |
| 6 | 87408539 | 87483254 - | NM_001037727 | Arhgap25      | 70532 | 87412522 | 87412722 |
| 6 | 87408539 | 87483254 - | NM_001286610 | Arhgap25      | 10620 | 87472434 | 87472634 |

|   |          |            |              |          |       |          |          |
|---|----------|------------|--------------|----------|-------|----------|----------|
| 6 | 87408539 | 87483254 - | NM_001286610 | Arhgap25 | 70532 | 87412522 | 87412722 |
| 6 | 87408539 | 87446322 - | NM_175476    | Arhgap25 | 33600 | 87412522 | 87412722 |
| 6 | 87408539 | 87446322 - | NR_104483    | Arhgap25 | 33600 | 87412522 | 87412722 |
| 6 | 87728130 | 87729757 + | NM_018762    | Gp9      | -1979 | 87725951 | 87726151 |
| 6 | 87738847 | 87761774 - | NM_001039394 | Rab43    | 7517  | 87754057 | 87754257 |
| 6 | 87738847 | 87761774 - | NM_001039394 | Rab43    | -2091 | 87763865 | 87764065 |
| 6 | 87738847 | 87761774 - | NM_001039394 | Rab43    | 2835  | 87758739 | 87758939 |
| 6 | 87738847 | 87761774 - | NM_001039394 | Rab43    | 20720 | 87740854 | 87741054 |
| 6 | 87738847 | 87759752 - | NM_133717    | Rab43    | 5495  | 87754057 | 87754257 |
| 6 | 87738847 | 87759752 - | NM_133717    | Rab43    | -4113 | 87763865 | 87764065 |
| 6 | 87738847 | 87759752 - | NM_133717    | Rab43    | 813   | 87758739 | 87758939 |
| 6 | 87738847 | 87759752 - | NM_133717    | Rab43    | 18698 | 87740854 | 87741054 |
| 6 | 87738847 | 87762093 - | NR_104477    | Rab43    | 7836  | 87754057 | 87754257 |
| 6 | 87738847 | 87762093 - | NR_104477    | Rab43    | -1772 | 87763865 | 87764065 |
| 6 | 87738847 | 87762093 - | NR_104477    | Rab43    | 3154  | 87758739 | 87758939 |
| 6 | 87738847 | 87762093 - | NR_104477    | Rab43    | 21039 | 87740854 | 87741054 |
| 6 | 87738847 | 87762159 - | NR_104478    | Rab43    | 7902  | 87754057 | 87754257 |
| 6 | 87738847 | 87762159 - | NR_104478    | Rab43    | -1706 | 87763865 | 87764065 |
| 6 | 87738847 | 87762159 - | NR_104478    | Rab43    | 3220  | 87758739 | 87758939 |
| 6 | 87738847 | 87762159 - | NR_104478    | Rab43    | 21105 | 87740854 | 87741054 |
| 6 | 87949100 | 87995265 - | NM_001293652 | Rab7     | -3880 | 87999145 | 87999345 |
| 6 | 87949100 | 87995265 - | NM_001293652 | Rab7     | -7978 | 88003243 | 88003443 |
| 6 | 87949100 | 87995265 - | NM_001293652 | Rab7     | 29507 | 87965558 | 87965758 |
| 6 | 87949100 | 87995012 - | NM_001293653 | Rab7     | -4133 | 87999145 | 87999345 |
| 6 | 87949100 | 87995012 - | NM_001293653 | Rab7     | -8231 | 88003243 | 88003443 |
| 6 | 87949100 | 87995012 - | NM_001293653 | Rab7     | 29254 | 87965558 | 87965758 |
| 6 | 87949100 | 87969790 - | NM_001293654 | Rab7     | 4032  | 87965558 | 87965758 |
| 6 | 87949100 | 87969790 - | NM_001293655 | Rab7     | 4032  | 87965558 | 87965758 |
| 6 | 87949100 | 87995265 - | NM_009005    | Rab7     | -3880 | 87999145 | 87999345 |
| 6 | 87949100 | 87995265 - | NM_009005    | Rab7     | -7978 | 88003243 | 88003443 |

|   |          |            |              |               |        |          |          |
|---|----------|------------|--------------|---------------|--------|----------|----------|
| 6 | 87949100 | 87995265 - | NM_009005    | Rab7          | 29507  | 87965558 | 87965758 |
| 6 | 88207328 | 88396534 - | NM_023060    | Eefsec        | 185532 | 88210802 | 88211002 |
| 6 | 88207328 | 88396534 - | NM_023060    | Eefsec        | 153716 | 88242618 | 88242818 |
| 6 | 88674406 | 88778355 + | NM_001166249 | Mgll          | 20688  | 88695094 | 88695294 |
| 6 | 88674406 | 88778355 + | NM_011844    | Mgll          | 20688  | 88695094 | 88695294 |
| 6 | 88674698 | 88716703 + | NM_001166250 | Mgll          | 20396  | 88695094 | 88695294 |
| 6 | 88674698 | 88778355 + | NM_001166251 | Mgll          | 20396  | 88695094 | 88695294 |
| 6 | 89333140 | 89545647 - | NM_001167736 | Chchd6        | 182817 | 89362630 | 89362830 |
| 6 | 89333140 | 89545647 - | NM_001167736 | Chchd6        | 174027 | 89371420 | 89371620 |
| 6 | 89333140 | 89545647 - | NM_025351    | Chchd6        | 182817 | 89362630 | 89362830 |
| 6 | 89333140 | 89545647 - | NM_025351    | Chchd6        | 174027 | 89371420 | 89371620 |
| 6 | 90319488 | 90335389 + | NM_030260    | Zxdc          | 5243   | 90324731 | 90324931 |
| 6 | 90319488 | 90353481 + | NM_173002    | Zxdc          | 5243   | 90324731 | 90324931 |
| 6 | 90500842 | 90549166 + | NM_027406    | Aldh1l1       | 19118  | 90519960 | 90520160 |
| 6 | 90500842 | 90549166 + | NM_027406    | Aldh1l1       | -5903  | 90494739 | 90494939 |
| 6 | 90500842 | 90549166 + | NM_027406    | Aldh1l1       | 10302  | 90511144 | 90511344 |
| 6 | 90554874 | 90596407 + | NM_027868    | Slc41a3       | 1609   | 90556483 | 90556683 |
| 6 | 90609592 | 90666524 - | NM_001134383 | lqsec1        | 3497   | 90662827 | 90663027 |
| 6 | 90609592 | 90760118 - | NM_001134384 | lqsec1        | 97091  | 90662827 | 90663027 |
| 6 | 91106809 | 91124678 + | NM_144919    | Hdac11        | 906    | 91107715 | 91107915 |
| 6 | 91106809 | 91124678 + | NM_144919    | Hdac11        | -1034  | 91105575 | 91105775 |
| 6 | 91106809 | 91124678 + | NM_144919    | Hdac11        | -2386  | 91104223 | 91104423 |
| 6 | 91380454 | 91390849 - | NR_045980    | 4930471M09Rik | -432   | 91391281 | 91391481 |
| 6 | 91390981 | 91391750 + | NR_038153    | 1810044D09Rik | 300    | 91391281 | 91391481 |
| 6 | 91634061 | 91709058 + | NM_009320    | Slc6a6        | 12702  | 91646763 | 91646963 |
| 6 | 91634061 | 91709058 + | NM_009320    | Slc6a6        | 18141  | 91652202 | 91652402 |
| 6 | 91634061 | 91709058 + | NM_009320    | Slc6a6        | 30414  | 91664475 | 91664675 |
| 6 | 91634061 | 91709058 + | NM_009320    | Slc6a6        | 15638  | 91649699 | 91649899 |
| 6 | 91634061 | 91709058 + | NM_009320    | Slc6a6        | 6965   | 91641026 | 91641226 |
| 6 | 91634061 | 91709058 + | NM_009320    | Slc6a6        | 2529   | 91636590 | 91636790 |

|   |          |            |              |               |        |          |          |
|---|----------|------------|--------------|---------------|--------|----------|----------|
| 6 | 91711503 | 91757388 - | NM_001159507 | Grip2         | 10883  | 91746305 | 91746505 |
| 6 | 91854227 | 91900720 + | NM_198668    | 4930590J08Rik | 7261   | 91861488 | 91861688 |
| 6 | 91937104 | 92026000 + | NM_172731    | Fgd5          | 6744   | 91943848 | 91944048 |
| 6 | 92041412 | 92123053 + | NM_011630    | Nr2c2         | 13382  | 92054794 | 92054994 |
| 6 | 93625447 | 94233912 - | NM_001029850 | Magi1         | 79998  | 94153714 | 94153914 |
| 6 | 93625447 | 94233912 - | NM_001029850 | Magi1         | 166572 | 94067140 | 94067340 |
| 6 | 93625447 | 94233912 - | NM_001029850 | Magi1         | 112250 | 94121462 | 94121662 |
| 6 | 93625447 | 94233912 - | NM_001029850 | Magi1         | 94590  | 94139122 | 94139322 |
| 6 | 93625447 | 94233912 - | NM_001029850 | Magi1         | 109033 | 94124679 | 94124879 |
| 6 | 93625447 | 94233912 - | NM_001029850 | Magi1         | 128683 | 94105029 | 94105229 |
| 6 | 93625447 | 94233912 - | NM_001029850 | Magi1         | 156178 | 94077534 | 94077734 |
| 6 | 93625447 | 94233912 - | NM_001029850 | Magi1         | 218770 | 94014942 | 94015142 |
| 6 | 93625447 | 94233912 - | NM_001029850 | Magi1         | 199793 | 94033919 | 94034119 |
| 6 | 93625447 | 94233912 - | NM_001029850 | Magi1         | 214299 | 94019413 | 94019613 |
| 6 | 93625447 | 94233912 - | NM_001029850 | Magi1         | 465536 | 93768176 | 93768376 |
| 6 | 93625447 | 94233912 - | NM_001029850 | Magi1         | 222854 | 94010858 | 94011058 |
| 6 | 93625447 | 93863685 - | NM_001083320 | Magi1         | 95309  | 93768176 | 93768376 |
| 6 | 93625447 | 94233912 - | NM_001286784 | Magi1         | 79998  | 94153714 | 94153914 |
| 6 | 93625447 | 94233912 - | NM_001286784 | Magi1         | 166572 | 94067140 | 94067340 |
| 6 | 93625447 | 94233912 - | NM_001286784 | Magi1         | 112250 | 94121462 | 94121662 |
| 6 | 93625447 | 94233912 - | NM_001286784 | Magi1         | 94590  | 94139122 | 94139322 |
| 6 | 93625447 | 94233912 - | NM_001286784 | Magi1         | 109033 | 94124679 | 94124879 |
| 6 | 93625447 | 94233912 - | NM_001286784 | Magi1         | 128683 | 94105029 | 94105229 |
| 6 | 93625447 | 94233912 - | NM_001286784 | Magi1         | 156178 | 94077534 | 94077734 |
| 6 | 93625447 | 94233912 - | NM_001286784 | Magi1         | 218770 | 94014942 | 94015142 |
| 6 | 93625447 | 94233912 - | NM_001286784 | Magi1         | 199793 | 94033919 | 94034119 |
| 6 | 93625447 | 94233912 - | NM_001286784 | Magi1         | 214299 | 94019413 | 94019613 |
| 6 | 93625447 | 94233912 - | NM_001286784 | Magi1         | 465536 | 93768176 | 93768376 |
| 6 | 93625447 | 94233912 - | NM_001286784 | Magi1         | 222854 | 94010858 | 94011058 |
| 6 | 93625447 | 94233912 - | NM_001286785 | Magi1         | 79998  | 94153714 | 94153914 |

|   |          |            |              |       |        |          |          |
|---|----------|------------|--------------|-------|--------|----------|----------|
| 6 | 93625447 | 94233912 - | NM_001286785 | Magi1 | 166572 | 94067140 | 94067340 |
| 6 | 93625447 | 94233912 - | NM_001286785 | Magi1 | 112250 | 94121462 | 94121662 |
| 6 | 93625447 | 94233912 - | NM_001286785 | Magi1 | 94590  | 94139122 | 94139322 |
| 6 | 93625447 | 94233912 - | NM_001286785 | Magi1 | 109033 | 94124679 | 94124879 |
| 6 | 93625447 | 94233912 - | NM_001286785 | Magi1 | 128683 | 94105029 | 94105229 |
| 6 | 93625447 | 94233912 - | NM_001286785 | Magi1 | 156178 | 94077534 | 94077734 |
| 6 | 93625447 | 94233912 - | NM_001286785 | Magi1 | 218770 | 94014942 | 94015142 |
| 6 | 93625447 | 94233912 - | NM_001286785 | Magi1 | 199793 | 94033919 | 94034119 |
| 6 | 93625447 | 94233912 - | NM_001286785 | Magi1 | 214299 | 94019413 | 94019613 |
| 6 | 93625447 | 94233912 - | NM_001286785 | Magi1 | 465536 | 93768176 | 93768376 |
| 6 | 93625447 | 94233912 - | NM_001286785 | Magi1 | 222854 | 94010858 | 94011058 |
| 6 | 93625447 | 94233912 - | NM_010367    | Magi1 | 79998  | 94153714 | 94153914 |
| 6 | 93625447 | 94233912 - | NM_010367    | Magi1 | 166572 | 94067140 | 94067340 |
| 6 | 93625447 | 94233912 - | NM_010367    | Magi1 | 112250 | 94121462 | 94121662 |
| 6 | 93625447 | 94233912 - | NM_010367    | Magi1 | 94590  | 94139122 | 94139322 |
| 6 | 93625447 | 94233912 - | NM_010367    | Magi1 | 109033 | 94124679 | 94124879 |
| 6 | 93625447 | 94233912 - | NM_010367    | Magi1 | 128683 | 94105029 | 94105229 |
| 6 | 93625447 | 94233912 - | NM_010367    | Magi1 | 156178 | 94077534 | 94077734 |
| 6 | 93625447 | 94233912 - | NM_010367    | Magi1 | 218770 | 94014942 | 94015142 |
| 6 | 93625447 | 94233912 - | NM_010367    | Magi1 | 199793 | 94033919 | 94034119 |
| 6 | 93625447 | 94233912 - | NM_010367    | Magi1 | 214299 | 94019413 | 94019613 |
| 6 | 93625447 | 94233912 - | NM_010367    | Magi1 | 465536 | 93768176 | 93768376 |
| 6 | 93625447 | 94233912 - | NM_010367    | Magi1 | 222854 | 94010858 | 94011058 |
| 6 | 93631472 | 93863685 - | NM_001083321 | Magi1 | 95309  | 93768176 | 93768376 |
| 6 | 93631472 | 94233912 - | NM_001286786 | Magi1 | 79998  | 94153714 | 94153914 |
| 6 | 93631472 | 94233912 - | NM_001286786 | Magi1 | 166572 | 94067140 | 94067340 |
| 6 | 93631472 | 94233912 - | NM_001286786 | Magi1 | 112250 | 94121462 | 94121662 |
| 6 | 93631472 | 94233912 - | NM_001286786 | Magi1 | 94590  | 94139122 | 94139322 |
| 6 | 93631472 | 94233912 - | NM_001286786 | Magi1 | 109033 | 94124679 | 94124879 |
| 6 | 93631472 | 94233912 - | NM_001286786 | Magi1 | 128683 | 94105029 | 94105229 |

|   |          |            |              |               |        |          |          |
|---|----------|------------|--------------|---------------|--------|----------|----------|
| 6 | 93631472 | 94233912 - | NM_001286786 | Magi1         | 156178 | 94077534 | 94077734 |
| 6 | 93631472 | 94233912 - | NM_001286786 | Magi1         | 218770 | 94014942 | 94015142 |
| 6 | 93631472 | 94233912 - | NM_001286786 | Magi1         | 199793 | 94033919 | 94034119 |
| 6 | 93631472 | 94233912 - | NM_001286786 | Magi1         | 214299 | 94019413 | 94019613 |
| 6 | 93631472 | 94233912 - | NM_001286786 | Magi1         | 465536 | 93768176 | 93768376 |
| 6 | 93631472 | 94233912 - | NM_001286786 | Magi1         | 222854 | 94010858 | 94011058 |
| 6 | 93631472 | 93863685 - | NM_001286788 | Magi1         | 95309  | 93768176 | 93768376 |
| 6 | 93631472 | 93862958 - | NR_104594    | Magi1         | 94582  | 93768176 | 93768376 |
| 6 | 94082917 | 94187437 - | NR_130996    | 4930511A08Rik | 33523  | 94153714 | 94153914 |
| 6 | 94082917 | 94187437 - | NR_130996    | 4930511A08Rik | 65775  | 94121462 | 94121662 |
| 6 | 94082917 | 94187437 - | NR_130996    | 4930511A08Rik | 48115  | 94139122 | 94139322 |
| 6 | 94082917 | 94187437 - | NR_130996    | 4930511A08Rik | 62558  | 94124679 | 94124879 |
| 6 | 94082917 | 94187437 - | NR_130996    | 4930511A08Rik | 82208  | 94105029 | 94105229 |
| 6 | 94554523 | 94650140 - | NM_008377    | Lrig1         | 1710   | 94648230 | 94648430 |
| 6 | 94554523 | 94650140 - | NM_008377    | Lrig1         | -9804  | 94659944 | 94660144 |
| 6 | 94554523 | 94650140 - | NM_008377    | Lrig1         | 23352  | 94626588 | 94626788 |
| 6 | 94554523 | 94650140 - | NM_008377    | Lrig1         | 14677  | 94635263 | 94635463 |
| 6 | 94554523 | 94650140 - | NM_008377    | Lrig1         | 19138  | 94630802 | 94631002 |
| 6 | 95423003 | 95668841 - | NM_011507    | Suclg2        | -1865  | 95670706 | 95670906 |
| 6 | 97060938 | 97098878 - | NM_175313    | Eogt          | 23592  | 97075086 | 97075286 |
| 6 | 97060938 | 97098878 - | NM_175313    | Eogt          | 24065  | 97074613 | 97074813 |
| 6 | 97133626 | 97155642 - | NM_001111106 | Uba3          | -1588  | 97157230 | 97157430 |
| 6 | 97133626 | 97155642 - | NM_001301857 | Uba3          | -1588  | 97157230 | 97157430 |
| 6 | 97133626 | 97155642 - | NM_001301858 | Uba3          | -1588  | 97157230 | 97157430 |
| 6 | 97133626 | 97155642 - | NM_011666    | Uba3          | -1588  | 97157230 | 97157430 |
| 6 | 97135569 | 97155642 - | NM_001301859 | Uba3          | -1588  | 97157230 | 97157430 |
| 6 | 97160786 | 97183310 + | NM_022992    | Arl6ip5       | -3356  | 97157230 | 97157430 |
| 6 | 97188522 | 97202775 - | NM_001081157 | Lmod3         | 9989   | 97192586 | 97192786 |
| 6 | 97236861 | 97567652 - | NM_145148    | Frmd4b        | 94310  | 97473142 | 97473342 |
| 6 | 97236861 | 97567652 - | NM_145148    | Frmd4b        | 306478 | 97260974 | 97261174 |



|   |           |             |              |        |        |           |           |
|---|-----------|-------------|--------------|--------|--------|-----------|-----------|
| 6 | 97236861  | 97567652 -  | NM_145148    | Frmd4b | 259733 | 97307719  | 97307919  |
| 6 | 97236861  | 97567652 -  | NM_145148    | Frmd4b | 207653 | 97359799  | 97359999  |
| 6 | 97236861  | 97567652 -  | NM_145148    | Frmd4b | 210792 | 97356660  | 97356860  |
| 6 | 97236861  | 97567652 -  | NM_145148    | Frmd4b | 275531 | 97291921  | 97292121  |
| 6 | 97236861  | 97567652 -  | NM_145148    | Frmd4b | 290390 | 97277062  | 97277262  |
| 6 | 98875336  | 99216510 -  | NM_001197321 | Foxp1  | 160216 | 99056094  | 99056294  |
| 6 | 98875336  | 99216510 -  | NM_001197321 | Foxp1  | 67005  | 99149305  | 99149505  |
| 6 | 98875336  | 99216510 -  | NM_001197321 | Foxp1  | 45653  | 99170657  | 99170857  |
| 6 | 98875336  | 99216510 -  | NM_001197321 | Foxp1  | 59784  | 99156526  | 99156726  |
| 6 | 98875336  | 99216510 -  | NM_001197321 | Foxp1  | 72543  | 99143767  | 99143967  |
| 6 | 98875336  | 99216510 -  | NM_001197321 | Foxp1  | 145213 | 99071097  | 99071297  |
| 6 | 98875336  | 99216510 -  | NM_001197321 | Foxp1  | 255159 | 98961151  | 98961351  |
| 6 | 98875336  | 99216510 -  | NM_001197321 | Foxp1  | 224145 | 98992165  | 98992365  |
| 6 | 98875336  | 99216510 -  | NM_001197321 | Foxp1  | 245123 | 98971187  | 98971387  |
| 6 | 98875336  | 98978293 -  | NM_001197322 | Foxp1  | 16942  | 98961151  | 98961351  |
| 6 | 98875336  | 98978293 -  | NM_001197322 | Foxp1  | 6906   | 98971187  | 98971387  |
| 6 | 98875336  | 99385340 -  | NM_053202    | Foxp1  | 329046 | 99056094  | 99056294  |
| 6 | 98875336  | 99385340 -  | NM_053202    | Foxp1  | 235835 | 99149305  | 99149505  |
| 6 | 98875336  | 99385340 -  | NM_053202    | Foxp1  | 214483 | 99170657  | 99170857  |
| 6 | 98875336  | 99385340 -  | NM_053202    | Foxp1  | 228614 | 99156526  | 99156726  |
| 6 | 98875336  | 99385340 -  | NM_053202    | Foxp1  | 241373 | 99143767  | 99143967  |
| 6 | 98875336  | 99385340 -  | NM_053202    | Foxp1  | 314043 | 99071097  | 99071297  |
| 6 | 98875336  | 99385340 -  | NM_053202    | Foxp1  | 423989 | 98961151  | 98961351  |
| 6 | 98875336  | 99385340 -  | NM_053202    | Foxp1  | 392975 | 98992165  | 98992365  |
| 6 | 98875336  | 99385340 -  | NM_053202    | Foxp1  | 413953 | 98971187  | 98971387  |
| 6 | 100178559 | 100237353 - | NM_019743    | Rybp   | -1036  | 100238389 | 100238589 |
| 6 | 100521805 | 100621152 - | NM_181590    | Shq1   | -4052  | 100625204 | 100625404 |
| 6 | 100521805 | 100621152 - | NM_181590    | Shq1   | 59620  | 100561332 | 100561532 |
| 6 | 100654728 | 100755076 + | NM_198612    | Gxylt2 | 98213  | 100752941 | 100753141 |
| 6 | 101099601 | 101327892 - | NM_018884    | Pdzrn3 | 105917 | 101221775 | 101221975 |

|   |           |             |              |               |        |           |           |
|---|-----------|-------------|--------------|---------------|--------|-----------|-----------|
| 6 | 103460870 | 103683030 + | NM_007697    | Chl1          | 138227 | 103599097 | 103599297 |
| 6 | 108163090 | 108501111 + | NM_010585    | ltpr1         | 319532 | 108482622 | 108482822 |
| 6 | 108163090 | 108501111 + | NM_010585    | ltpr1         | 321918 | 108485008 | 108485208 |
| 6 | 108163090 | 108501111 + | NM_010585    | ltpr1         | 321196 | 108484286 | 108484486 |
| 6 | 108163090 | 108501111 + | NM_010585    | ltpr1         | 259674 | 108422764 | 108422964 |
| 6 | 108163090 | 108501111 + | NM_010585    | ltpr1         | 314429 | 108477519 | 108477719 |
| 6 | 108163090 | 108501111 + | NM_010585    | ltpr1         | 279447 | 108442537 | 108442737 |
| 6 | 108163090 | 108501111 + | NM_010585    | ltpr1         | 240635 | 108403725 | 108403925 |
| 6 | 108163090 | 108501111 + | NM_010585    | ltpr1         | 253259 | 108416349 | 108416549 |
| 6 | 108163090 | 108501111 + | NM_010585    | ltpr1         | 217112 | 108380202 | 108380402 |
| 6 | 108439737 | 108439798 + | NR_106121    | Mir7661       | 2800   | 108442537 | 108442737 |
| 6 | 108527030 | 108610929 - | NR_104577    | 0610040F04Rik | 25125  | 108585604 | 108585804 |
| 6 | 108527030 | 108610929 - | NR_104577    | 0610040F04Rik | 13570  | 108597159 | 108597359 |
| 6 | 108527030 | 108610929 - | NR_104577    | 0610040F04Rik | 18627  | 108592102 | 108592302 |
| 6 | 108527030 | 108610929 - | NR_104577    | 0610040F04Rik | 53843  | 108556886 | 108557086 |
| 6 | 108733053 | 108773718 + | NM_026011    | Arl8b         | -4841  | 108728012 | 108728212 |
| 6 | 108778635 | 108809351 + | NM_138677    | Edem1         | 4481   | 108783116 | 108783316 |
| 6 | 112223752 | 112280418 + | NM_144799    | Lmcd1         | 932    | 112224684 | 112224884 |
| 6 | 112223752 | 112280418 + | NM_144799    | Lmcd1         | 19651  | 112243403 | 112243603 |
| 6 | 112236788 | 112240314 - | NR_045986    | 5031434C07Rik | -3089  | 112243403 | 112243603 |
| 6 | 112236788 | 112240314 - | NR_045987    | 5031434C07Rik | -3089  | 112243403 | 112243603 |
| 6 | 112667966 | 112897261 - | NM_080448    | Srgap3        | 87211  | 112809850 | 112810050 |
| 6 | 113017423 | 113027239 - | NR_027010    | Gt(ROSA)26Sor | 918    | 113026121 | 113026321 |
| 6 | 113020393 | 113027239 - | NR_027008    | Gt(ROSA)26Sor | 918    | 113026121 | 113026321 |
| 6 | 113020393 | 113027239 - | NR_027009    | Gt(ROSA)26Sor | 918    | 113026121 | 113026321 |
| 6 | 113027633 | 113103419 + | NM_028385    | Setd5         | -1312  | 113026121 | 113026321 |
| 6 | 113257131 | 113274857 + | NM_001282126 | Brpf1         | 6644   | 113263775 | 113263975 |
| 6 | 113257131 | 113274857 + | NM_001282127 | Brpf1         | 6644   | 113263775 | 113263975 |
| 6 | 113257131 | 113274857 + | NM_001282128 | Brpf1         | 6644   | 113263775 | 113263975 |
| 6 | 113257131 | 113274857 + | NM_030178    | Brpf1         | 6644   | 113263775 | 113263975 |

|   |           |             |              |        |       |           |           |
|---|-----------|-------------|--------------|--------|-------|-----------|-----------|
| 6 | 113316655 | 113327515 - | NM_133932    | Tada3  | -7870 | 113335385 | 113335585 |
| 6 | 113316655 | 113327515 - | NM_133932    | Tada3  | -389  | 113327904 | 113328104 |
| 6 | 113328107 | 113340442 + | NM_001170485 | Arpc4  | 7278  | 113335385 | 113335585 |
| 6 | 113328107 | 113340442 + | NM_001170485 | Arpc4  | -3    | 113327904 | 113328104 |
| 6 | 113328107 | 113340442 + | NM_001170486 | Arpc4  | 7278  | 113335385 | 113335585 |
| 6 | 113328107 | 113340442 + | NM_001170486 | Arpc4  | -3    | 113327904 | 113328104 |
| 6 | 113328107 | 113340442 + | NM_026552    | Arpc4  | 7278  | 113335385 | 113335585 |
| 6 | 113328107 | 113340442 + | NM_026552    | Arpc4  | -3    | 113327904 | 113328104 |
| 6 | 113339254 | 113349443 + | NM_001142732 | Ttll3  | -3669 | 113335385 | 113335585 |
| 6 | 113342491 | 113364566 + | NM_133923    | Ttll3  | -6906 | 113335385 | 113335585 |
| 6 | 113421449 | 113433135 + | NM_134159    | Il17rc | 5610  | 113427059 | 113427259 |
| 6 | 113421449 | 113433158 + | NM_178942    | Il17rc | 5610  | 113427059 | 113427259 |
| 6 | 113433563 | 113443333 + | NM_133930    | Creld1 | 3507  | 113437070 | 113437270 |
| 6 | 113433563 | 113443333 + | NM_133930    | Creld1 | -6304 | 113427059 | 113427259 |
| 6 | 113588461 | 113645021 + | NM_001113553 | Irak2  | 52208 | 113640669 | 113640869 |
| 6 | 113588461 | 113645021 + | NM_172161    | Irak2  | 52208 | 113640669 | 113640869 |
| 6 | 113647493 | 113661063 + | NM_001033463 | Tatdn2 | -6624 | 113640669 | 113640869 |
| 6 | 113647493 | 113661063 + | NM_001033463 | Tatdn2 | -1215 | 113646078 | 113646278 |
| 6 | 113678046 | 113690676 - | NM_024206    | Sec13  | 2793  | 113687683 | 113687883 |
| 6 | 113678046 | 113690676 - | NM_024206    | Sec13  | 3388  | 113687088 | 113687288 |
| 6 | 114347930 | 114433291 + | NM_008285    | Hrh1   | 52333 | 114400263 | 114400463 |
| 6 | 114347930 | 114433291 + | NM_008285    | Hrh1   | 60368 | 114408298 | 114408498 |
| 6 | 114347930 | 114433291 + | NM_008285    | Hrh1   | 28384 | 114376314 | 114376514 |
| 6 | 114347930 | 114433291 + | NM_008285    | Hrh1   | 51941 | 114399871 | 114400071 |
| 6 | 114353660 | 114433291 + | NM_001252642 | Hrh1   | 46603 | 114400263 | 114400463 |
| 6 | 114353660 | 114433291 + | NM_001252642 | Hrh1   | 54638 | 114408298 | 114408498 |
| 6 | 114353660 | 114433291 + | NM_001252642 | Hrh1   | 22654 | 114376314 | 114376514 |
| 6 | 114353660 | 114433291 + | NM_001252642 | Hrh1   | 46211 | 114399871 | 114400071 |
| 6 | 114353660 | 114433291 + | NM_001252643 | Hrh1   | 46603 | 114400263 | 114400463 |
| 6 | 114353660 | 114433291 + | NM_001252643 | Hrh1   | 54638 | 114408298 | 114408498 |

|   |           |             |              |       |        |           |           |
|---|-----------|-------------|--------------|-------|--------|-----------|-----------|
| 6 | 114353660 | 114433291 + | NM_001252643 | Hrh1  | 22654  | 114376314 | 114376514 |
| 6 | 114353660 | 114433291 + | NM_001252643 | Hrh1  | 46211  | 114399871 | 114400071 |
| 6 | 114593119 | 114810633 + | NM_001253717 | Atg7  | 157853 | 114750972 | 114751172 |
| 6 | 114593119 | 114810633 + | NM_001253718 | Atg7  | 157853 | 114750972 | 114751172 |
| 6 | 114593119 | 114810633 + | NM_028835    | Atg7  | 157853 | 114750972 | 114751172 |
| 6 | 115310969 | 115440420 + | NM_001127330 | Pparg | 104899 | 115415868 | 115416068 |
| 6 | 115310969 | 115440420 + | NM_001127330 | Pparg | 119848 | 115430817 | 115431017 |
| 6 | 115310969 | 115440420 + | NM_001127330 | Pparg | 117374 | 115428343 | 115428543 |
| 6 | 115310969 | 115440420 + | NM_001127330 | Pparg | 53684  | 115364653 | 115364853 |
| 6 | 115310969 | 115440420 + | NM_001127330 | Pparg | 102050 | 115413019 | 115413219 |
| 6 | 115310969 | 115440420 + | NM_001127330 | Pparg | 83662  | 115394631 | 115394831 |
| 6 | 115311162 | 115440420 + | NM_001308352 | Pparg | 104706 | 115415868 | 115416068 |
| 6 | 115311162 | 115440420 + | NM_001308352 | Pparg | 119655 | 115430817 | 115431017 |
| 6 | 115311162 | 115440420 + | NM_001308352 | Pparg | 117181 | 115428343 | 115428543 |
| 6 | 115311162 | 115440420 + | NM_001308352 | Pparg | 53491  | 115364653 | 115364853 |
| 6 | 115311162 | 115440420 + | NM_001308352 | Pparg | 101857 | 115413019 | 115413219 |
| 6 | 115311162 | 115440420 + | NM_001308352 | Pparg | 83469  | 115394631 | 115394831 |
| 6 | 115312367 | 115440420 + | NM_001308354 | Pparg | 103501 | 115415868 | 115416068 |
| 6 | 115312367 | 115440420 + | NM_001308354 | Pparg | 118450 | 115430817 | 115431017 |
| 6 | 115312367 | 115440420 + | NM_001308354 | Pparg | 115976 | 115428343 | 115428543 |
| 6 | 115312367 | 115440420 + | NM_001308354 | Pparg | 52286  | 115364653 | 115364853 |
| 6 | 115312367 | 115440420 + | NM_001308354 | Pparg | 100652 | 115413019 | 115413219 |
| 6 | 115312367 | 115440420 + | NM_001308354 | Pparg | 82264  | 115394631 | 115394831 |
| 6 | 115372084 | 115440420 + | NM_011146    | Pparg | 43784  | 115415868 | 115416068 |
| 6 | 115372084 | 115440420 + | NM_011146    | Pparg | 58733  | 115430817 | 115431017 |
| 6 | 115372084 | 115440420 + | NM_011146    | Pparg | 56259  | 115428343 | 115428543 |
| 6 | 115372084 | 115440420 + | NM_011146    | Pparg | -7231  | 115364653 | 115364853 |
| 6 | 115372084 | 115440420 + | NM_011146    | Pparg | 40935  | 115413019 | 115413219 |
| 6 | 115372084 | 115440420 + | NM_011146    | Pparg | 22547  | 115394631 | 115394831 |
| 6 | 115494722 | 115528355 + | NM_199033    | Tsen2 | -5317  | 115489205 | 115489405 |

|   |           |             |              |          |        |           |           |
|---|-----------|-------------|--------------|----------|--------|-----------|-----------|
| 6 | 115533565 | 115542595 - | NM_001101431 | Mkrn2os  | 477    | 115541918 | 115542118 |
| 6 | 115533565 | 115542595 - | NM_001101431 | Mkrn2os  | 74     | 115542321 | 115542521 |
| 6 | 115533565 | 115542595 - | NM_001101431 | Mkrn2os  | 8504   | 115533891 | 115534091 |
| 6 | 115551956 | 115568689 + | NM_023290    | Mkrn2    | -9838  | 115541918 | 115542118 |
| 6 | 115551956 | 115568689 + | NM_023290    | Mkrn2    | -9435  | 115542321 | 115542521 |
| 6 | 115568591 | 115626654 - | NM_029780    | Raf1     | -3152  | 115629806 | 115630006 |
| 6 | 115968636 | 116143393 - | NM_177412    | Tmcc1    | 129085 | 116014108 | 116014308 |
| 6 | 115968636 | 116143393 - | NM_177412    | Tmcc1    | 118194 | 116024999 | 116025199 |
| 6 | 115968636 | 116143393 - | NM_177412    | Tmcc1    | 171003 | 115972190 | 115972390 |
| 6 | 116360089 | 116411197 - | NM_009662    | Alox5    | 7861   | 116403136 | 116403336 |
| 6 | 116443629 | 116444559 + | NM_146912    | Olf211   | -6172  | 116437257 | 116437457 |
| 6 | 116574034 | 116578947 - | NM_001302439 | Zfp422   | -6448  | 116585395 | 116585595 |
| 6 | 116574034 | 116578720 - | NM_001302440 | Zfp422   | -6675  | 116585395 | 116585595 |
| 6 | 116574034 | 116579018 - | NM_026057    | Zfp422   | -6377  | 116585395 | 116585595 |
| 6 | 116583026 | 116623855 - | NM_178045    | Rassf4   | -60    | 116623915 | 116624115 |
| 6 | 116583026 | 116623855 - | NM_178045    | Rassf4   | -2765  | 116626620 | 116626820 |
| 6 | 116583026 | 116623855 - | NM_178045    | Rassf4   | 38260  | 116585395 | 116585595 |
| 6 | 116642743 | 116666777 - | NM_178768    | Tmem72   | -63    | 116666840 | 116667040 |
| 6 | 117850358 | 117875641 + | NM_001166432 | Hnrnpf   | 8218   | 117858576 | 117858776 |
| 6 | 117856800 | 117875641 + | NM_001166430 | Hnrnpf   | 1776   | 117858576 | 117858776 |
| 6 | 117856800 | 117875641 + | NM_001166431 | Hnrnpf   | 1776   | 117858576 | 117858776 |
| 6 | 117856800 | 117875641 + | NM_133834    | Hnrnpf   | 1776   | 117858576 | 117858776 |
| 6 | 117857822 | 117875641 + | NM_001166428 | Hnrnpf   | 754    | 117858576 | 117858776 |
| 6 | 117857822 | 117875641 + | NM_001166429 | Hnrnpf   | 754    | 117858576 | 117858776 |
| 6 | 117867312 | 117875641 + | NM_001166427 | Hnrnpf   | -8536  | 117858576 | 117858776 |
| 6 | 118537258 | 119146428 - | NM_001255997 | Cacna1c  | 56625  | 119089603 | 119089803 |
| 6 | 118537258 | 119146428 - | NM_001255998 | Cacna1c  | 56625  | 119089603 | 119089803 |
| 6 | 118537258 | 119146428 - | NM_001255999 | Cacna1c  | 56625  | 119089603 | 119089803 |
| 6 | 118537258 | 119146428 - | NM_009781    | Cacna1c  | 56625  | 119089603 | 119089803 |
| 6 | 119186544 | 119302426 + | NM_001033382 | Cacna2d4 | -5396  | 119180948 | 119181148 |

|   |           |             |              |          |        |           |           |
|---|-----------|-------------|--------------|----------|--------|-----------|-----------|
| 6 | 119303168 | 119367502 - | NM_197985    | Adipor2  | 11844  | 119355458 | 119355658 |
| 6 | 119303168 | 119367502 - | NM_197985    | Adipor2  | 7620   | 119359682 | 119359882 |
| 6 | 119382549 | 119417230 - | NM_001271758 | Wnt5b    | -179   | 119417409 | 119417609 |
| 6 | 119382549 | 119494366 - | NM_009525    | Wnt5b    | 58646  | 119435520 | 119435720 |
| 6 | 119382549 | 119494366 - | NM_009525    | Wnt5b    | 76757  | 119417409 | 119417609 |
| 6 | 119520814 | 119798169 - | NM_053204    | Erc1     | 205134 | 119592835 | 119593035 |
| 6 | 119520814 | 119798169 - | NR_104484    | Erc1     | 205134 | 119592835 | 119593035 |
| 6 | 119873987 | 119988674 - | NM_001185020 | Wnk1     | 78177  | 119910297 | 119910497 |
| 6 | 119873987 | 119988674 - | NM_001185020 | Wnk1     | 30474  | 119958000 | 119958200 |
| 6 | 119873987 | 119988674 - | NM_001185021 | Wnk1     | 78177  | 119910297 | 119910497 |
| 6 | 119873987 | 119988674 - | NM_001185021 | Wnk1     | 30474  | 119958000 | 119958200 |
| 6 | 119873987 | 119988674 - | NM_001199083 | Wnk1     | 78177  | 119910297 | 119910497 |
| 6 | 119873987 | 119988674 - | NM_001199083 | Wnk1     | 30474  | 119958000 | 119958200 |
| 6 | 119873987 | 119988674 - | NM_001199084 | Wnk1     | 78177  | 119910297 | 119910497 |
| 6 | 119873987 | 119988674 - | NM_001199084 | Wnk1     | 30474  | 119958000 | 119958200 |
| 6 | 119873987 | 119988674 - | NM_198703    | Wnk1     | 78177  | 119910297 | 119910497 |
| 6 | 119873987 | 119988674 - | NM_198703    | Wnk1     | 30474  | 119958000 | 119958200 |
| 6 | 120043398 | 120150357 + | NM_016718    | Ninj2    | 74368  | 120117766 | 120117966 |
| 6 | 120153828 | 120244578 - | NM_198884    | B4galnt3 | 17239  | 120227139 | 120227339 |
| 6 | 120153828 | 120244578 - | NM_198884    | B4galnt3 | 51566  | 120192812 | 120193012 |
| 6 | 120153828 | 120244578 - | NM_198884    | B4galnt3 | 61462  | 120182916 | 120183116 |
| 6 | 120413215 | 120433746 + | NM_008359    | Il17ra   | -8757  | 120404258 | 120404458 |
| 6 | 120786248 | 120842861 + | NM_153516    | Bcl2l13  | 14524  | 120800772 | 120800972 |
| 6 | 120786248 | 120842861 + | NM_153516    | Bcl2l13  | 37735  | 120823983 | 120824183 |
| 6 | 120881564 | 121081041 - | NM_001270475 | Mical3   | 23396  | 121057445 | 121057645 |
| 6 | 120881564 | 121081041 - | NM_001270475 | Mical3   | 1153   | 121079688 | 121079888 |
| 6 | 120881564 | 121081041 - | NM_001270475 | Mical3   | 31994  | 121048847 | 121049047 |
| 6 | 121133685 | 121146211 + | NM_001304773 | Pex26    | -6641  | 121126844 | 121127044 |
| 6 | 121133685 | 121146211 + | NM_001304774 | Pex26    | -6641  | 121126844 | 121127044 |
| 6 | 121133685 | 121146211 + | NM_028730    | Pex26    | -6641  | 121126844 | 121127044 |

|   |           |             |              |         |       |           |           |
|---|-----------|-------------|--------------|---------|-------|-----------|-----------|
| 6 | 121133685 | 121148856 + | NR_130903    | Pex26   | -6641 | 121126844 | 121127044 |
| 6 | 122220619 | 122232852 - | NM_016970    | Klrg1   | 7955  | 122224697 | 122224897 |
| 6 | 122527810 | 122552463 - | NM_001134391 | Apobec1 | 10703 | 122541560 | 122541760 |
| 6 | 122527810 | 122552463 - | NM_031159    | Apobec1 | 10703 | 122541560 | 122541760 |
| 6 | 122770202 | 122795385 + | NM_021899    | Foxj2   | 6229  | 122776431 | 122776631 |
| 6 | 122781395 | 122781456 + | NR_106090    | Mir7231 | -4764 | 122776431 | 122776631 |
| 6 | 124346834 | 124364882 - | NM_001277330 | Pex5    | -9337 | 124374219 | 124374419 |
| 6 | 124346834 | 124365086 - | NM_001277805 | Pex5    | -9133 | 124374219 | 124374419 |
| 6 | 124346834 | 124365086 - | NM_008995    | Pex5    | -9133 | 124374219 | 124374419 |
| 6 | 124346834 | 124365086 - | NM_175933    | Pex5    | -9133 | 124374219 | 124374419 |
| 6 | 124380774 | 124414803 - | NM_153508    | Clstn3  | 15811 | 124398792 | 124398992 |
| 6 | 124443131 | 124460662 + | NM_181344    | C1rl    | -5289 | 124437642 | 124437842 |
| 6 | 124462639 | 124473459 + | NM_023143    | C1ra    | -372  | 124462067 | 124462267 |
| 6 | 124480362 | 124492378 - | NM_001097617 | C1s1    | 0     | 124492335 | 124492535 |
| 6 | 124480362 | 124492378 - | NM_001097617 | C1s1    | -6810 | 124499188 | 124499388 |
| 6 | 124480362 | 124492340 - | NM_144938    | C1s1    | 0     | 124492335 | 124492535 |
| 6 | 124480362 | 124492340 - | NM_144938    | C1s1    | -6848 | 124499188 | 124499388 |
| 6 | 124520448 | 124531063 + | NM_001113356 | C1rb    | -474  | 124519774 | 124519974 |
| 6 | 124613122 | 124654735 + | NM_145130    | Lpcat3  | 20757 | 124633879 | 124634079 |
| 6 | 124613122 | 124654735 + | NM_145130    | Lpcat3  | 23043 | 124636165 | 124636365 |
| 6 | 124613122 | 124654735 + | NM_145130    | Lpcat3  | 30659 | 124643781 | 124643981 |
| 6 | 124613122 | 124654735 + | NM_145130    | Lpcat3  | 21886 | 124635008 | 124635208 |
| 6 | 124613122 | 124654735 + | NM_145130    | Lpcat3  | 14720 | 124627842 | 124628042 |
| 6 | 124613122 | 124654735 + | NM_145130    | Lpcat3  | 17608 | 124630730 | 124630930 |
| 6 | 124613122 | 124654735 + | NM_145130    | Lpcat3  | 15745 | 124628867 | 124629067 |
| 6 | 124613122 | 124654735 + | NM_145130    | Lpcat3  | 1950  | 124615072 | 124615272 |
| 6 | 124654388 | 124662197 - | NM_013536    | Emg1    | -7497 | 124669694 | 124669894 |
| 6 | 124667932 | 124668004 - | NR_029554    | Mir141  | -1690 | 124669694 | 124669894 |
| 6 | 124668340 | 124668409 - | NR_029792    | Mir200c | -1285 | 124669694 | 124669894 |
| 6 | 124689202 | 124691098 - | NM_013535    | Grcc10  | -9444 | 124700542 | 124700742 |

|   |           |             |              |               |        |           |           |
|---|-----------|-------------|--------------|---------------|--------|-----------|-----------|
| 6 | 124692562 | 124706506 - | NM_007881    | Atn1          | 5764   | 124700542 | 124700742 |
| 6 | 125017938 | 125032491 + | NM_001163269 | Lpar5         | 3431   | 125021369 | 125021569 |
| 6 | 125017938 | 125032491 + | NM_001163269 | Lpar5         | 12485  | 125030423 | 125030623 |
| 6 | 125017938 | 125032491 + | NM_001163269 | Lpar5         | -509   | 125017229 | 125017429 |
| 6 | 125021295 | 125032491 + | NM_001163268 | Lpar5         | 74     | 125021369 | 125021569 |
| 6 | 125021295 | 125032491 + | NM_001163268 | Lpar5         | 9128   | 125030423 | 125030623 |
| 6 | 125021295 | 125032491 + | NM_001163268 | Lpar5         | -3866  | 125017229 | 125017429 |
| 6 | 125046181 | 125080520 + | NM_145979    | Chd4          | 19350  | 125065531 | 125065731 |
| 6 | 125256589 | 125263889 - | NM_010736    | Ltbr          | 334    | 125263355 | 125263555 |
| 6 | 125271358 | 125294961 + | NM_011324    | Scnn1a        | -7803  | 125263355 | 125263555 |
| 6 | 125299741 | 125312502 + | NM_011609    | Tnfrsf1a      | 1807   | 125301548 | 125301748 |
| 6 | 125299741 | 125312502 + | NM_011609    | Tnfrsf1a      | -3570  | 125295971 | 125296171 |
| 6 | 125312669 | 125330523 - | NM_198604    | Plekhg6       | -433   | 125330956 | 125331156 |
| 6 | 125640437 | 125990147 + | NM_153589    | Ano2          | 186453 | 125826890 | 125827090 |
| 6 | 125640437 | 125990147 + | NM_153589    | Ano2          | 177882 | 125818319 | 125818519 |
| 6 | 126771881 | 126799163 - | NM_025358    | Ndufa9        | 0      | 126799143 | 126799343 |
| 6 | 126803116 | 126824327 + | NM_009650    | Akap3         | -3773  | 126799143 | 126799343 |
| 6 | 127035134 | 127059571 - | NM_177003    | Tigar         | -216   | 127059787 | 127059987 |
| 6 | 127035134 | 127059571 - | NM_177003    | Tigar         | 892    | 127058479 | 127058679 |
| 6 | 127075727 | 127101067 - | NM_009829    | Ccnd2         | 5297   | 127095570 | 127095770 |
| 6 | 127099407 | 127162438 + | NR_040274    | 9330179D12Rik | -3637  | 127095570 | 127095770 |
| 6 | 127099644 | 127162438 + | NR_040273    | 9330179D12Rik | -3874  | 127095570 | 127095770 |
| 6 | 127099644 | 127162438 + | NR_040275    | 9330179D12Rik | -3874  | 127095570 | 127095770 |
| 6 | 127403741 | 127444258 + | NM_181402    | Parp11        | -8942  | 127394599 | 127394799 |
| 6 | 127837640 | 127903050 + | NM_026743    | Tspan11       | 47621  | 127885261 | 127885461 |
| 6 | 128177161 | 128250832 - | NM_001080979 | Tead4         | 55726  | 128194906 | 128195106 |
| 6 | 128177161 | 128250832 - | NM_001080979 | Tead4         | 4627   | 128246005 | 128246205 |
| 6 | 128177161 | 128250832 - | NM_001080979 | Tead4         | 10799  | 128239833 | 128240033 |
| 6 | 128177161 | 128250832 - | NM_011567    | Tead4         | 55726  | 128194906 | 128195106 |
| 6 | 128177161 | 128250832 - | NM_011567    | Tead4         | 4627   | 128246005 | 128246205 |



|   |           |             |              |               |        |           |           |
|---|-----------|-------------|--------------|---------------|--------|-----------|-----------|
| 6 | 128177161 | 128250832 - | NM_011567    | Tead4         | 10799  | 128239833 | 128240033 |
| 6 | 128380125 | 128388650 - | NM_010219    | Fkbp4         | 2860   | 128385590 | 128385790 |
| 6 | 128388775 | 128425864 + | NR_028592    | Gm10069       | -2985  | 128385590 | 128385790 |
| 6 | 128388775 | 128453300 + | NR_028593    | Gm10069       | -2985  | 128385590 | 128385790 |
| 6 | 128433585 | 128476739 - | NM_007376    | Pzp           | -519   | 128477258 | 128477458 |
| 6 | 128612403 | 128627393 + | NM_053165    | Clec2h        | -7511  | 128604692 | 128604892 |
| 6 | 128763724 | 128776334 - | NM_030599    | Klrb1b        | -9450  | 128785784 | 128785984 |
| 6 | 128798062 | 128841143 - | NM_001254946 | BC035044      | 35463  | 128805480 | 128805680 |
| 6 | 129041834 | 129050922 - | NM_153506    | Clec2e        | -2059  | 129052981 | 129053181 |
| 6 | 129041834 | 129050922 - | NM_153506    | Clec2e        | 8702   | 129042020 | 129042220 |
| 6 | 129130633 | 129136554 + | NM_053109    | Clec2d        | 3933   | 129134566 | 129134766 |
| 6 | 129182641 | 129188064 - | NR_040265    | 2310001H17Rik | -3955  | 129192019 | 129192219 |
| 6 | 129182641 | 129188501 - | NR_040266    | 2310001H17Rik | -3518  | 129192019 | 129192219 |
| 6 | 129182641 | 129188501 - | NR_040268    | 2310001H17Rik | -3518  | 129192019 | 129192219 |
| 6 | 129482202 | 129483303 - | NR_045270    | 1700101I11Rik | 0      | 129483239 | 129483439 |
| 6 | 129483210 | 129492350 + | NM_020590    | Gabarapl1     | 29     | 129483239 | 129483439 |
| 6 | 131249162 | 131263846 - | NM_172891    | Styk1         | -8232  | 131272078 | 131272278 |
| 6 | 131249162 | 131263846 - | NM_172891    | Styk1         | 8826   | 131254820 | 131255020 |
| 6 | 133985718 | 134220166 + | NM_001303102 | Etv6          | 175264 | 134160982 | 134161182 |
| 6 | 133985718 | 134220166 + | NM_001303102 | Etv6          | 207768 | 134193486 | 134193686 |
| 6 | 133985718 | 134220166 + | NM_001303102 | Etv6          | 181278 | 134166996 | 134167196 |
| 6 | 133985718 | 134220166 + | NM_001303102 | Etv6          | 38296  | 134024014 | 134024214 |
| 6 | 133985718 | 134220166 + | NM_001303102 | Etv6          | 100796 | 134086514 | 134086714 |
| 6 | 133985718 | 134220166 + | NM_001303102 | Etv6          | 52224  | 134037942 | 134038142 |
| 6 | 133985718 | 134220166 + | NM_001303102 | Etv6          | 30545  | 134016263 | 134016463 |
| 6 | 133985718 | 134220166 + | NM_007961    | Etv6          | 175264 | 134160982 | 134161182 |
| 6 | 133985718 | 134220166 + | NM_007961    | Etv6          | 207768 | 134193486 | 134193686 |
| 6 | 133985718 | 134220166 + | NM_007961    | Etv6          | 181278 | 134166996 | 134167196 |
| 6 | 133985718 | 134220166 + | NM_007961    | Etv6          | 38296  | 134024014 | 134024214 |
| 6 | 133985718 | 134220166 + | NM_007961    | Etv6          | 100796 | 134086514 | 134086714 |

|   |           |             |              |               |       |           |           |
|---|-----------|-------------|--------------|---------------|-------|-----------|-----------|
| 6 | 133985718 | 134220166 + | NM_007961    | Etv6          | 52224 | 134037942 | 134038142 |
| 6 | 133985718 | 134220166 + | NM_007961    | Etv6          | 30545 | 134016263 | 134016463 |
| 6 | 134396496 | 134516932 - | NM_008514    | Lrp6          | -8367 | 134525299 | 134525499 |
| 6 | 134396496 | 134516932 - | NM_008514    | Lrp6          | 95787 | 134420945 | 134421145 |
| 6 | 134396496 | 134516932 - | NM_008514    | Lrp6          | 33574 | 134483158 | 134483358 |
| 6 | 134396496 | 134516932 - | NM_008514    | Lrp6          | 80652 | 134436080 | 134436280 |
| 6 | 134396496 | 134516932 - | NM_008514    | Lrp6          | 99831 | 134416901 | 134417101 |
| 6 | 134559225 | 134582507 - | NM_026345    | Mansc1        | -8175 | 134590682 | 134590882 |
| 6 | 134559225 | 134582507 - | NM_026345    | Mansc1        | 17580 | 134564727 | 134564927 |
| 6 | 134589530 | 134661203 + | NM_001170479 | Loh12cr1      | 38716 | 134628246 | 134628446 |
| 6 | 134589530 | 134661203 + | NM_001170479 | Loh12cr1      | 1152  | 134590682 | 134590882 |
| 6 | 134590958 | 134661203 + | NM_026371    | Loh12cr1      | 37288 | 134628246 | 134628446 |
| 6 | 134590958 | 134661203 + | NM_026371    | Loh12cr1      | -76   | 134590682 | 134590882 |
| 6 | 134665486 | 134742647 - | NM_001048054 | Dusp16        | 4140  | 134738307 | 134738507 |
| 6 | 134665486 | 134742647 - | NM_001048054 | Dusp16        | 68226 | 134674221 | 134674421 |
| 6 | 134665486 | 134742647 - | NM_001048054 | Dusp16        | 61419 | 134681028 | 134681228 |
| 6 | 134665486 | 134742647 - | NM_001048054 | Dusp16        | 73341 | 134669106 | 134669306 |
| 6 | 134665486 | 134742647 - | NM_130447    | Dusp16        | 4140  | 134738307 | 134738507 |
| 6 | 134665486 | 134742647 - | NM_130447    | Dusp16        | 68226 | 134674221 | 134674421 |
| 6 | 134665486 | 134742647 - | NM_130447    | Dusp16        | 61419 | 134681028 | 134681228 |
| 6 | 134665486 | 134742647 - | NM_130447    | Dusp16        | 73341 | 134669106 | 134669306 |
| 6 | 134780217 | 134807902 + | NM_177687    | Crebl2        | -1261 | 134778756 | 134778956 |
| 6 | 134819110 | 134847944 - | NM_001167694 | Gpr19         | -833  | 134848777 | 134848977 |
| 6 | 134819110 | 134847844 - | NM_001167695 | Gpr19         | -933  | 134848777 | 134848977 |
| 6 | 134819110 | 134847844 - | NM_001167696 | Gpr19         | -933  | 134848777 | 134848977 |
| 6 | 134819110 | 134847944 - | NM_001167700 | Gpr19         | -833  | 134848777 | 134848977 |
| 6 | 134819110 | 134847944 - | NR_072990    | Gpr19         | -833  | 134848777 | 134848977 |
| 6 | 134847979 | 134850804 + | NR_029441    | 2810454H06Rik | 798   | 134848777 | 134848977 |
| 6 | 134932019 | 134936855 + | NM_001109914 | Apold1        | -9656 | 134922163 | 134922363 |
| 6 | 134932019 | 134936855 + | NM_001109914 | Apold1        | -5462 | 134926357 | 134926557 |

|   |           |             |              |               |        |           |           |
|---|-----------|-------------|--------------|---------------|--------|-----------|-----------|
| 6 | 134932019 | 134936855 + | NM_001109914 | Apold1        | -5946  | 134925873 | 134926073 |
| 6 | 135148005 | 135186259 + | NM_028982    | 8430419L09Rik | 2370   | 135150375 | 135150575 |
| 6 | 135312949 | 135333192 + | NM_001288628 | Emp1          | -1449  | 135311300 | 135311500 |
| 6 | 135312949 | 135333192 + | NM_001288628 | Emp1          | -1051  | 135311698 | 135311898 |
| 6 | 135312949 | 135333192 + | NM_010128    | Emp1          | -1449  | 135311300 | 135311500 |
| 6 | 135312949 | 135333192 + | NM_010128    | Emp1          | -1051  | 135311698 | 135311898 |
| 6 | 135317511 | 135333192 + | NM_001288627 | Emp1          | -6011  | 135311300 | 135311500 |
| 6 | 135317511 | 135333192 + | NM_001288627 | Emp1          | -5613  | 135311698 | 135311898 |
| 6 | 135679823 | 136123530 - | NM_008171    | Grin2b        | 86124  | 136037206 | 136037406 |
| 6 | 136560592 | 136610415 - | NM_025806    | Plbd1         | 3410   | 136606805 | 136607005 |
| 6 | 136560592 | 136610415 - | NM_025806    | Plbd1         | 644    | 136609571 | 136609771 |
| 6 | 136560592 | 136610415 - | NM_025806    | Plbd1         | 28390  | 136581825 | 136582025 |
| 6 | 136560592 | 136610415 - | NM_025806    | Plbd1         | 11955  | 136598260 | 136598460 |
| 6 | 136645805 | 136730264 - | NM_001127318 | Gucy2c        | 19362  | 136710702 | 136710902 |
| 6 | 136645805 | 136730264 - | NM_001127318 | Gucy2c        | 17295  | 136712769 | 136712969 |
| 6 | 136645805 | 136730264 - | NM_001127318 | Gucy2c        | 59475  | 136670589 | 136670789 |
| 6 | 136645805 | 136730264 - | NM_145067    | Gucy2c        | 19362  | 136710702 | 136710902 |
| 6 | 136645805 | 136730264 - | NM_145067    | Gucy2c        | 17295  | 136712769 | 136712969 |
| 6 | 136645805 | 136730264 - | NM_145067    | Gucy2c        | 59475  | 136670589 | 136670789 |
| 6 | 136752514 | 136752953 - | NM_175652    | Hist4h4       | 108    | 136752645 | 136752845 |
| 6 | 136756769 | 136758596 + | NM_177688    | H2afj         | -3924  | 136752645 | 136752845 |
| 6 | 137200820 | 137413155 + | NM_001164401 | Ptpro         | 188547 | 137389367 | 137389567 |
| 6 | 137200820 | 137413155 + | NM_011216    | Ptpro         | 188547 | 137389367 | 137389567 |
| 6 | 137359242 | 137413155 + | NM_001164402 | Ptpro         | 30125  | 137389367 | 137389567 |
| 6 | 137359242 | 137413155 + | NM_001164403 | Ptpro         | 30125  | 137389367 | 137389567 |
| 6 | 137683603 | 137700452 + | NM_011499    | Strap         | -305   | 137683098 | 137683298 |
| 6 | 137932111 | 138028438 - | NM_177787    | Slc15a5       | 27210  | 138001028 | 138001228 |
| 6 | 138089058 | 138105274 + | NM_019946    | Mgst1         | 3076   | 138092134 | 138092334 |
| 6 | 139535772 | 139917805 + | NM_207683    | Pik3c2g       | -28    | 139535544 | 139535744 |
| 6 | 139535772 | 139917805 + | NM_207683    | Pik3c2g       | 251821 | 139787593 | 139787793 |

|   |           |             |              |         |        |           |           |
|---|-----------|-------------|--------------|---------|--------|-----------|-----------|
| 6 | 139789966 | 139917805 + | NM_011084    | Pik3c2g | -2173  | 139787593 | 139787793 |
| 6 | 140372620 | 140543428 + | NM_144920    | Plekha5 | 146171 | 140518791 | 140518991 |
| 6 | 140571184 | 140604003 + | NM_178803    | Aebp2   | 28395  | 140599579 | 140599779 |
| 6 | 140572023 | 140604003 + | NM_001005605 | Aebp2   | 27556  | 140599579 | 140599779 |
| 6 | 140572023 | 140626994 + | NM_009637    | Aebp2   | 27556  | 140599579 | 140599779 |
| 6 | 140573430 | 140604003 + | NM_001309437 | Aebp2   | 26149  | 140599579 | 140599779 |
| 6 | 140575406 | 140604003 + | NM_001309436 | Aebp2   | 24173  | 140599579 | 140599779 |
| 6 | 141197790 | 141447873 + | NM_018779    | Pde3a   | 134758 | 141332548 | 141332748 |
| 6 | 141197790 | 141447873 + | NM_018779    | Pde3a   | 206180 | 141403970 | 141404170 |
| 6 | 141197790 | 141447873 + | NM_018779    | Pde3a   | -3862  | 141193728 | 141193928 |
| 6 | 141197790 | 141447873 + | NM_018779    | Pde3a   | 22152  | 141219942 | 141220142 |
| 6 | 141197790 | 141447873 + | NM_018779    | Pde3a   | 80014  | 141277804 | 141278004 |
| 6 | 141197790 | 141447873 + | NM_018779    | Pde3a   | 24516  | 141222306 | 141222506 |
| 6 | 141197790 | 141447873 + | NM_018779    | Pde3a   | 21410  | 141219200 | 141219400 |
| 6 | 141197790 | 141447873 + | NM_018779    | Pde3a   | 3356   | 141201146 | 141201346 |
| 6 | 142182748 | 142271502 - | NM_130861    | Slco1a5 | 32894  | 142238408 | 142238608 |
| 6 | 142246945 | 142252340 + | NM_010491    | lapp    | -8337  | 142238408 | 142238608 |
| 6 | 142513459 | 142519877 - | NM_008428    | Kcnj8   | -749   | 142520626 | 142520826 |
| 6 | 142705206 | 142724235 + | NM_009908    | Cmas    | 655    | 142705861 | 142706061 |
| 6 | 142734301 | 142752987 - | NM_001145390 | Gm766   | 4273   | 142748514 | 142748714 |
| 6 | 142734301 | 142752987 - | NM_001145390 | Gm766   | -1985  | 142754972 | 142755172 |
| 6 | 142734301 | 142752987 - | NM_001145390 | Gm766   | -5002  | 142757989 | 142758189 |
| 6 | 142734301 | 142752987 - | NM_001145390 | Gm766   | -35    | 142753022 | 142753222 |
| 6 | 142734301 | 142752987 - | NM_001145390 | Gm766   | 5476   | 142747311 | 142747511 |
| 6 | 142734301 | 142752987 - | NM_001145390 | Gm766   | 11780  | 142741007 | 142741207 |
| 6 | 142762751 | 142782015 + | NR_045707    | Gm7457  | 17092  | 142779843 | 142780043 |
| 6 | 142762751 | 142782015 + | NR_045707    | Gm7457  | -7579  | 142754972 | 142755172 |
| 6 | 142762751 | 142782015 + | NR_045707    | Gm7457  | -4562  | 142757989 | 142758189 |
| 6 | 142762751 | 142782015 + | NR_045707    | Gm7457  | -9529  | 142753022 | 142753222 |
| 6 | 142770061 | 142912973 - | NM_011374    | St8sia1 | 132930 | 142779843 | 142780043 |

|   |           |             |              |         |        |           |           |
|---|-----------|-------------|--------------|---------|--------|-----------|-----------|
| 6 | 143115750 | 143157067 + | NM_029250    | Etnk1   | -2724  | 143112826 | 143113026 |
| 6 | 145165219 | 145198752 - | NM_021284    | Kras    | -5750  | 145204502 | 145204702 |
| 6 | 145165219 | 145198752 - | NM_021284    | Kras    | 6233   | 145192319 | 145192519 |
| 6 | 145199072 | 145200377 + | NR_045598    | Gm15706 | -6553  | 145192319 | 145192519 |
| 6 | 146056821 | 146450746 - | NM_010586    | Itpr2   | 67780  | 146382766 | 146382966 |
| 6 | 146056821 | 146450746 - | NM_010586    | Itpr2   | 296912 | 146153634 | 146153834 |
| 6 | 146056821 | 146450746 - | NM_019923    | Itpr2   | 67780  | 146382766 | 146382966 |
| 6 | 146056821 | 146450746 - | NM_019923    | Itpr2   | 296912 | 146153634 | 146153834 |
| 6 | 146798632 | 146819927 + | NM_027059    | Smco2   | -6332  | 146792100 | 146792300 |
| 6 | 147995938 | 148131283 + | NM_178797    | Far2    | 61748  | 148057686 | 148057886 |
| 6 | 147995938 | 148131283 + | NM_178797    | Far2    | 88094  | 148084032 | 148084232 |
| 6 | 147995938 | 148131283 + | NM_178797    | Far2    | 769    | 147996707 | 147996907 |
| 6 | 147995938 | 148131283 + | NM_178797    | Far2    | 61064  | 148057002 | 148057202 |
| 6 | 147995938 | 148131283 + | NM_178797    | Far2    | 41382  | 148037320 | 148037520 |
| 6 | 148127840 | 148160897 - | NM_001286560 | Ergic2  | 18156  | 148142541 | 148142741 |
| 6 | 148127840 | 148160897 - | NM_001286560 | Ergic2  | 17801  | 148142896 | 148143096 |
| 6 | 148127840 | 148160897 - | NM_026168    | Ergic2  | 18156  | 148142541 | 148142741 |
| 6 | 148127840 | 148160897 - | NM_026168    | Ergic2  | 17801  | 148142896 | 148143096 |
| 6 | 148180952 | 148392875 - | NM_198967    | Tmtc1   | 156610 | 148236065 | 148236265 |
| 6 | 149106099 | 149137235 - | NM_001113424 | Amn1    | 226    | 149136809 | 149137009 |
| 6 | 149357506 | 149511849 + | NM_001112796 | Bicd1   | 48518  | 149406024 | 149406224 |
| 6 | 149357506 | 149511849 + | NM_009753    | Bicd1   | 48518  | 149406024 | 149406224 |
| 7 | 3303658   | 3331155 +   | NM_001291434 | Prkcg   | 3236   | 3306894   | 3307094   |
| 7 | 3303658   | 3331155 +   | NM_011102    | Prkcg   | 3236   | 3306894   | 3307094   |
| 7 | 3596871   | 3612712 +   | NM_146176    | Cnot3   | -697   | 3595974   | 3596174   |
| 7 | 3611709   | 3617443 -   | NM_027203    | Leng1   | -1303  | 3618746   | 3618946   |
| 7 | 3617356   | 3629156 -   | NM_181820    | Tmc4    | 10210  | 3618746   | 3618946   |
| 7 | 3617356   | 3629156 -   | NM_181820    | Tmc4    | -511   | 3629667   | 3629867   |
| 7 | 3629391   | 3645128 -   | NM_029934    | Mboat7  | 15261  | 3629667   | 3629867   |
| 7 | 4099785   | 4101475 -   | NM_175529    | Leng9   | -1049  | 4102524   | 4102724   |

|   |          |            |              |          |       |          |          |
|---|----------|------------|--------------|----------|-------|----------|----------|
| 7 | 4102862  | 4116302 -  | NM_021454    | Cdc42ep5 | -283  | 4116585  | 4116785  |
| 7 | 4102862  | 4116302 -  | NM_021454    | Cdc42ep5 | -2572 | 4118874  | 4119074  |
| 7 | 4102862  | 4116302 -  | NM_021454    | Cdc42ep5 | -5570 | 4121872  | 4122072  |
| 7 | 4102862  | 4116302 -  | NM_021454    | Cdc42ep5 | -1966 | 4118268  | 4118468  |
| 7 | 4433123  | 4453283 -  | NM_029834    | Ppp1r12c | -1133 | 4454416  | 4454616  |
| 7 | 4500216  | 4555644 -  | NM_207270    | Ptprh    | -126  | 4555770  | 4555970  |
| 7 | 4500216  | 4555644 -  | NM_207270    | Ptprh    | 1361  | 4554083  | 4554283  |
| 7 | 4579642  | 4582085 -  | NM_023440    | Tmem86b  | 1     | 4581884  | 4582084  |
| 7 | 4658434  | 4676854 -  | NM_177887    | Tmem150b | -7765 | 4684619  | 4684819  |
| 7 | 4658434  | 4676854 -  | NM_177887    | Tmem150b | -48   | 4676902  | 4677102  |
| 7 | 4667604  | 4676685 -  | NM_001142792 | Tmem150b | -7934 | 4684619  | 4684819  |
| 7 | 4667604  | 4676685 -  | NM_001142792 | Tmem150b | -217  | 4676902  | 4677102  |
| 7 | 4691729  | 4699117 +  | NM_001115018 | Suv420h2 | -6910 | 4684619  | 4684819  |
| 7 | 4691729  | 4699117 +  | NM_146177    | Suv420h2 | -6910 | 4684619  | 4684819  |
| 7 | 4828655  | 4847319 +  | NM_001101598 | Isoc2a   | -170  | 4828285  | 4828485  |
| 7 | 5013745  | 5031548 +  | NM_001205231 | U2af2    | -257  | 5013288  | 5013488  |
| 7 | 5013745  | 5031548 +  | NM_133671    | U2af2    | -257  | 5013288  | 5013488  |
| 7 | 5031837  | 5049781 +  | NM_001252454 | Epn1     | 3529  | 5035366  | 5035566  |
| 7 | 5031837  | 5049781 +  | NM_010147    | Epn1     | 3529  | 5035366  | 5035566  |
| 7 | 6083091  | 6107574 -  | NM_001013012 | Zfp787   | -995  | 6108569  | 6108769  |
| 7 | 7165707  | 7231001 -  | NR_003555    | Vmn2r29  | -332  | 7231333  | 7231533  |
| 7 | 7165707  | 7231001 -  | NR_003555    | Vmn2r29  | -2360 | 7233361  | 7233561  |
| 7 | 13591015 | 13595150 - | NM_001024699 | Zbtb45   | -4585 | 13599735 | 13599935 |
| 7 | 13609501 | 13616382 + | NM_011588    | Trim28   | -9566 | 13599735 | 13599935 |
| 7 | 13862662 | 13896777 + | NM_001199310 | Lig1     | 33320 | 13895982 | 13896182 |
| 7 | 13864175 | 13896777 + | NM_010715    | Lig1     | 31807 | 13895982 | 13896182 |
| 7 | 13864614 | 13896777 + | NM_001083188 | Lig1     | 31368 | 13895982 | 13896182 |
| 7 | 16502557 | 16507721 - | NM_009156    | Sepw1    | -7791 | 16515512 | 16515712 |
| 7 | 16556611 | 16584845 - | NM_001081418 | Gltscr1  | 5807  | 16578838 | 16579038 |
| 7 | 16556611 | 16584845 - | NM_001081418 | Gltscr1  | -3660 | 16588505 | 16588705 |

|   |          |            |              |          |       |          |          |
|---|----------|------------|--------------|----------|-------|----------|----------|
| 7 | 16705225 | 16712866 + | NM_133727    | Kptn     | -1170 | 16703855 | 16704055 |
| 7 | 16905585 | 16973246 - | NM_001285891 | Sae1     | 21580 | 16951466 | 16951666 |
| 7 | 16905585 | 16973246 - | NM_001285892 | Sae1     | 21580 | 16951466 | 16951666 |
| 7 | 16912400 | 16973246 - | NM_019748    | Sae1     | 21580 | 16951466 | 16951666 |
| 7 | 16986545 | 17023046 + | NM_198631    | Zc3h4    | 6361  | 16992906 | 16993106 |
| 7 | 16986545 | 17023046 + | NM_198631    | Zc3h4    | 24549 | 17011094 | 17011294 |
| 7 | 17038128 | 17040840 + | NM_026938    | Tmem160  | -354  | 17037574 | 17037774 |
| 7 | 17079822 | 17200343 - | NM_172739    | Arhgap35 | 32396 | 17167747 | 17167947 |
| 7 | 17079822 | 17200343 - | NM_172739    | Arhgap35 | -8759 | 17209102 | 17209302 |
| 7 | 17323793 | 17334640 + | NM_198613    | Ap2s1    | 7071  | 17330864 | 17331064 |
| 7 | 17428251 | 17455811 + | NM_001252458 | Prkd2    | 16145 | 17444396 | 17444596 |
| 7 | 17428251 | 17455811 + | NM_001252458 | Prkd2    | 15534 | 17443785 | 17443985 |
| 7 | 17428414 | 17455811 + | NM_178900    | Prkd2    | 15982 | 17444396 | 17444596 |
| 7 | 17428414 | 17455811 + | NM_178900    | Prkd2    | 15371 | 17443785 | 17443985 |
| 7 | 17589990 | 17613264 - | NM_011155    | Ppp5c    | 20441 | 17592623 | 17592823 |
| 7 | 17616342 | 17647777 - | NM_001162950 | Hif3a    | 19822 | 17627755 | 17627955 |
| 7 | 17616342 | 17642029 - | NM_016868    | Hif3a    | 14074 | 17627755 | 17627955 |
| 7 | 19705208 | 19723611 + | NM_175530    | Fbxo46   | 3221  | 19708429 | 19708629 |
| 7 | 19813738 | 19832167 + | NM_207525    | Opa3     | 6939  | 19820677 | 19820877 |
| 7 | 19842279 | 19857204 - | NM_001282021 | Vasp     | 6403  | 19850601 | 19850801 |
| 7 | 19842279 | 19857204 - | NM_001282022 | Vasp     | 6403  | 19850601 | 19850801 |
| 7 | 19842279 | 19857204 - | NM_009499    | Vasp     | 6403  | 19850601 | 19850801 |
| 7 | 19842279 | 19857204 - | NR_104069    | Vasp     | 6403  | 19850601 | 19850801 |
| 7 | 20011424 | 20043844 - | NM_172279    | Mark4    | 2319  | 20041325 | 20041525 |
| 7 | 20094078 | 20101495 + | NM_025960    | Trappc6a | -4805 | 20089073 | 20089273 |
| 7 | 20166387 | 20189836 - | NM_016680    | Clasrp   | 15037 | 20174599 | 20174799 |
| 7 | 20166387 | 20189836 - | NR_125832    | Clasrp   | 15037 | 20174599 | 20174799 |
| 7 | 20166387 | 20189836 - | NR_125833    | Clasrp   | 15037 | 20174599 | 20174799 |
| 7 | 20166387 | 20189836 - | NR_125834    | Clasrp   | 15037 | 20174599 | 20174799 |
| 7 | 20166387 | 20189711 - | NR_125835    | Clasrp   | 14912 | 20174599 | 20174799 |

|   |          |            |              |             |       |          |          |
|---|----------|------------|--------------|-------------|-------|----------|----------|
| 7 | 20166387 | 20189836 - | NR_125836    | Clasrp      | 15037 | 20174599 | 20174799 |
| 7 | 20191571 | 20214788 - | NM_009046    | Relb        | 5563  | 20209025 | 20209225 |
| 7 | 20191571 | 20214788 - | NM_009046    | Relb        | 4561  | 20210027 | 20210227 |
| 7 | 20191572 | 20214788 - | NM_001290457 | Relb        | 5563  | 20209025 | 20209225 |
| 7 | 20191572 | 20214788 - | NM_001290457 | Relb        | 4561  | 20210027 | 20210227 |
| 7 | 20256928 | 20263291 - | NM_001277944 | Apoc2       | 989   | 20262102 | 20262302 |
| 7 | 20256928 | 20259270 - | NM_001309795 | Apoc2       | -2832 | 20262102 | 20262302 |
| 7 | 20256928 | 20266810 - | NM_001309799 | Apoc4-apoc2 | -9450 | 20276260 | 20276460 |
| 7 | 20256928 | 20266810 - | NM_001309799 | Apoc4-apoc2 | 4508  | 20262102 | 20262302 |
| 7 | 20263433 | 20266810 - | NM_007385    | Apoc4       | -9450 | 20276260 | 20276460 |
| 7 | 20274829 | 20278009 - | NM_001110009 | Apoc1       | 1549  | 20276260 | 20276460 |
| 7 | 20274829 | 20278009 - | NM_007469    | Apoc1       | 1549  | 20276260 | 20276460 |
| 7 | 20365067 | 20382159 - | NM_001161844 | Cblc        | -4100 | 20386259 | 20386459 |
| 7 | 20365067 | 20382159 - | NM_023224    | Cblc        | -4100 | 20386259 | 20386459 |
| 7 | 20393811 | 20408105 - | NM_033601    | Bcl3        | -1238 | 20409343 | 20409543 |
| 7 | 20393811 | 20408105 - | NM_033601    | Bcl3        | -8652 | 20416757 | 20416957 |
| 7 | 20393811 | 20408105 - | NM_033601    | Bcl3        | -354  | 20408459 | 20408659 |
| 7 | 20437446 | 20446649 - | NM_001033419 | Ceacam16    | -6767 | 20453416 | 20453616 |
| 7 | 20437446 | 20446649 - | NM_001033419 | Ceacam16    | -5405 | 20452054 | 20452254 |
| 7 | 20461091 | 20473315 - | NM_177036    | Ceacam19    | 10797 | 20462318 | 20462518 |
| 7 | 20488927 | 20506493 - | NM_027514    | Pvr         | 0     | 20506350 | 20506550 |
| 7 | 20522654 | 20536093 - | NM_027308    | Igsf23      | -6    | 20536099 | 20536299 |
| 7 | 20550761 | 20576461 + | NM_027839    | Ceacam20    | 1112  | 20551873 | 20552073 |
| 7 | 20550761 | 20576461 + | NM_027839    | Ceacam20    | 21309 | 20572070 | 20572270 |
| 7 | 24897339 | 24912972 + | NM_021307    | Zfp112      | 3136  | 24900475 | 24900675 |
| 7 | 24897339 | 24912972 + | NM_021307    | Zfp112      | 0     | 24897142 | 24897342 |
| 7 | 24978234 | 24993169 - | NM_019940    | Zfp111      | 14700 | 24978269 | 24978469 |
| 7 | 25039813 | 25047464 + | NM_018791    | Zfp108      | 5704  | 25045517 | 25045717 |
| 7 | 25055437 | 25062814 + | NM_009567    | Zfp93       | -9720 | 25045517 | 25045717 |
| 7 | 25086723 | 25101686 - | NM_001199321 | Zfp94       | 136   | 25101350 | 25101550 |



|   |          |            |              |               |       |          |          |
|---|----------|------------|--------------|---------------|-------|----------|----------|
| 7 | 25086723 | 25101686 - | NM_009568    | Zfp94         | 136   | 25101350 | 25101550 |
| 7 | 25155282 | 25170232 + | NM_001163510 | Kcnn4         | 6798  | 25162080 | 25162280 |
| 7 | 25155282 | 25170232 + | NM_008433    | Kcnn4         | 6798  | 25162080 | 25162280 |
| 7 | 25184647 | 25207797 + | NM_028047    | Smg9          | 7567  | 25192214 | 25192414 |
| 7 | 25247519 | 25260893 + | NM_011113    | Plaur         | -617  | 25246702 | 25246902 |
| 7 | 25332169 | 25358458 + | NM_009532    | Xrcc1         | 25466 | 25357635 | 25357835 |
| 7 | 25368857 | 25372661 - | NM_001033205 | Zfp575        | 196   | 25372265 | 25372465 |
| 7 | 25372562 | 25393945 + | NM_023154    | Ethe1         | -97   | 25372265 | 25372465 |
| 7 | 25446313 | 25448129 + | NR_030681    | Gm4598        | -3737 | 25442376 | 25442576 |
| 7 | 25987859 | 26004879 - | NM_207677    | Dedd2         | 10292 | 25994387 | 25994587 |
| 7 | 26052718 | 26079179 + | NM_001302811 | Cic           | 22659 | 26075377 | 26075577 |
| 7 | 26067198 | 26079179 + | NM_027882    | Cic           | 8179  | 26075377 | 26075577 |
| 7 | 26080068 | 26082975 - | NM_008776    | Pafah1b3      | 819   | 26081956 | 26082156 |
| 7 | 26086378 | 26089153 + | NM_001081294 | Prr19         | -4222 | 26081956 | 26082156 |
| 7 | 26091127 | 26101215 + | NM_183311    | Tmem145       | -8971 | 26081956 | 26082156 |
| 7 | 26179732 | 26351437 + | NR_015569    | 4732471J01Rik | 82776 | 26262508 | 26262708 |
| 7 | 26246721 | 26262645 - | NM_001039185 | Ceacam1       | 0     | 26262508 | 26262708 |
| 7 | 26246721 | 26262645 - | NM_001039186 | Ceacam1       | 0     | 26262508 | 26262708 |
| 7 | 26246721 | 26262645 - | NM_001039187 | Ceacam1       | 0     | 26262508 | 26262708 |
| 7 | 26246721 | 26262645 - | NM_011926    | Ceacam1       | 0     | 26262508 | 26262708 |
| 7 | 26399640 | 26400912 - | NM_001039243 | Erich4        | -551  | 26401463 | 26401663 |
| 7 | 26404433 | 26410570 + | NM_001290487 | Atp5sl        | -2770 | 26401463 | 26401663 |
| 7 | 26404512 | 26410570 + | NM_025504    | Atp5sl        | -2849 | 26401463 | 26401663 |
| 7 | 26414871 | 26443781 - | NM_007533    | Bckdha        | 638   | 26442943 | 26443143 |
| 7 | 26444172 | 26453052 + | NM_138586    | Exosc5        | -1029 | 26442943 | 26443143 |
| 7 | 26444172 | 26453052 + | NR_104358    | Exosc5        | -1029 | 26442943 | 26443143 |
| 7 | 26587495 | 26601550 - | NM_028775    | Cyp2s1        | -245  | 26601795 | 26601995 |
| 7 | 26682677 | 26711644 + | NM_009999    | Cyp2b10       | -8238 | 26674239 | 26674439 |
| 7 | 26682677 | 26711644 + | NM_009999    | Cyp2b10       | 4896  | 26687573 | 26687773 |
| 7 | 26682677 | 26711644 + | NM_009999    | Cyp2b10       | 502   | 26683179 | 26683379 |

|   |          |            |              |               |       |          |          |
|---|----------|------------|--------------|---------------|-------|----------|----------|
| 7 | 27992189 | 28013617 - | NM_181593    | Itpkc         | 2867  | 28010550 | 28010750 |
| 7 | 28018032 | 28042969 + | NM_133770    | Adck4         | 7552  | 28025584 | 28025784 |
| 7 | 28018032 | 28042969 + | NM_133770    | Adck4         | -7282 | 28010550 | 28010750 |
| 7 | 28043780 | 28067170 + | NM_010950    | Numbl         | 3859  | 28047639 | 28047839 |
| 7 | 28090160 | 28118668 - | NM_001113549 | Ltbp4         | 730   | 28117738 | 28117938 |
| 7 | 28090160 | 28118668 - | NM_001113549 | Ltbp4         | 4497  | 28113971 | 28114171 |
| 7 | 28090160 | 28122632 - | NM_175641    | Ltbp4         | 4694  | 28117738 | 28117938 |
| 7 | 28090160 | 28122632 - | NM_175641    | Ltbp4         | 8461  | 28113971 | 28114171 |
| 7 | 28096579 | 28118683 - | NM_001310678 | Ltbp4         | 745   | 28117738 | 28117938 |
| 7 | 28096579 | 28118683 - | NM_001310678 | Ltbp4         | 4512  | 28113971 | 28114171 |
| 7 | 28317037 | 28338132 - | NM_011116    | Pld3          | 10058 | 28327874 | 28328074 |
| 7 | 28441394 | 28459601 - | NM_001290528 | Map3k10       | -73   | 28459674 | 28459874 |
| 7 | 28459680 | 28491502 + | NM_198417    | C030039L03Rik | 14646 | 28474326 | 28474526 |
| 7 | 28459680 | 28491502 + | NM_198417    | C030039L03Rik | 0     | 28459674 | 28459874 |
| 7 | 28474359 | 28491502 + | NM_001112731 | C030039L03Rik | 0     | 28474326 | 28474526 |
| 7 | 28692411 | 28714450 - | NM_028538    | 1700049G17Rik | -4061 | 28718511 | 28718711 |
| 7 | 28744819 | 28764177 - | NM_001081021 | Zfp780b       | 615   | 28763362 | 28763562 |
| 7 | 28954767 | 28964289 + | NM_007991    | Fbl           | -661  | 28953906 | 28954106 |
| 7 | 29099915 | 29123739 - | NM_013676    | Supt5         | -7718 | 29131457 | 29131657 |
| 7 | 29135708 | 29137718 + | NM_013647    | Rps16         | -4051 | 29131457 | 29131657 |
| 7 | 29136559 | 29136653 + | NR_028129    | AF357399      | -4902 | 29131457 | 29131657 |
| 7 | 29144623 | 29157682 - | NM_001083912 | Plekhg2       | -1342 | 29159024 | 29159224 |
| 7 | 29144623 | 29157682 - | NM_001083912 | Plekhg2       | -6684 | 29164366 | 29164566 |
| 7 | 29144623 | 29157682 - | NM_001290542 | Plekhg2       | -1342 | 29159024 | 29159224 |
| 7 | 29144623 | 29157682 - | NM_001290542 | Plekhg2       | -6684 | 29164366 | 29164566 |
| 7 | 29144623 | 29157682 - | NM_138752    | Plekhg2       | -1342 | 29159024 | 29159224 |
| 7 | 29144623 | 29157682 - | NM_138752    | Plekhg2       | -6684 | 29164366 | 29164566 |
| 7 | 29161803 | 29164248 - | NM_011756    | Zfp36         | -3872 | 29168120 | 29168320 |
| 7 | 29161803 | 29164248 - | NM_011756    | Zfp36         | -118  | 29164366 | 29164566 |
| 7 | 29178015 | 29184403 + | NM_019458    | Paf1          | -9695 | 29168120 | 29168320 |

|   |          |            |              |               |       |          |          |
|---|----------|------------|--------------|---------------|-------|----------|----------|
| 7 | 29343838 | 29383204 - | NM_027470    | Pak4          | 24749 | 29358255 | 29358455 |
| 7 | 29343838 | 29383204 - | NM_027470    | Pak4          | 5572  | 29377432 | 29377632 |
| 7 | 29501801 | 29523160 + | NM_001310687 | Fbxo17        | 15507 | 29517308 | 29517508 |
| 7 | 29501809 | 29523160 + | NM_015796    | Fbxo17        | 15499 | 29517308 | 29517508 |
| 7 | 29524660 | 29526801 - | NM_011885    | Mrps12        | 0     | 29526631 | 29526831 |
| 7 | 29526987 | 29538899 + | NM_023637    | Sars2         | -156  | 29526631 | 29526831 |
| 7 | 29526987 | 29538899 + | NM_023637    | Sars2         | -9479 | 29517308 | 29517508 |
| 7 | 29595909 | 29607286 + | NM_177301    | Hnrnp1        | 2211  | 29598120 | 29598320 |
| 7 | 29610357 | 29617259 + | NM_016772    | Ech1          | 6791  | 29617148 | 29617348 |
| 7 | 29610357 | 29617259 + | NM_016772    | Ech1          | 6256  | 29616613 | 29616813 |
| 7 | 29618813 | 29626723 + | NM_010706    | Lgals4        | -1465 | 29617148 | 29617348 |
| 7 | 29618813 | 29626723 + | NM_010706    | Lgals4        | 4026  | 29622839 | 29623039 |
| 7 | 29618813 | 29626723 + | NM_010706    | Lgals4        | -2000 | 29616613 | 29616813 |
| 7 | 29619201 | 29626653 + | NM_010707    | Lgals6        | -1853 | 29617148 | 29617348 |
| 7 | 29619201 | 29626653 + | NM_010707    | Lgals6        | 3638  | 29622839 | 29623039 |
| 7 | 29619201 | 29626653 + | NM_010707    | Lgals6        | -2388 | 29616613 | 29616813 |
| 7 | 29678273 | 29747300 - | NM_021895    | Actn4         | 8217  | 29738883 | 29739083 |
| 7 | 29678273 | 29747300 - | NM_021895    | Actn4         | -7885 | 29755185 | 29755385 |
| 7 | 29678273 | 29747300 - | NM_021895    | Actn4         | -7499 | 29754799 | 29754999 |
| 7 | 29678273 | 29747300 - | NM_021895    | Actn4         | 40824 | 29706276 | 29706476 |
| 7 | 29678273 | 29747300 - | NM_021895    | Actn4         | 11435 | 29735665 | 29735865 |
| 7 | 29678273 | 29747300 - | NM_021895    | Actn4         | 30494 | 29716606 | 29716806 |
| 7 | 30032540 | 30033487 - | NM_028179    | 2200002D01Rik | -2773 | 30036260 | 30036460 |
| 7 | 30032540 | 30033487 - | NM_028179    | 2200002D01Rik | -5454 | 30038941 | 30039141 |
| 7 | 30041349 | 30066997 - | NM_001082548 | Spint2        | 2162  | 30064635 | 30064835 |
| 7 | 30041349 | 30066997 - | NM_001082548 | Spint2        | -6601 | 30073598 | 30073798 |
| 7 | 30041349 | 30066997 - | NM_001082548 | Spint2        | 9824  | 30056973 | 30057173 |
| 7 | 30041349 | 30066997 - | NM_011464    | Spint2        | 2162  | 30064635 | 30064835 |
| 7 | 30041349 | 30066997 - | NM_011464    | Spint2        | -6601 | 30073598 | 30073798 |
| 7 | 30041349 | 30066997 - | NM_011464    | Spint2        | 9824  | 30056973 | 30057173 |

|   |          |            |              |          |        |          |          |
|---|----------|------------|--------------|----------|--------|----------|----------|
| 7 | 30074339 | 30078410 + | NM_026731    | Ppp1r14a | -9504  | 30064635 | 30064835 |
| 7 | 30074339 | 30078410 + | NM_026731    | Ppp1r14a | -541   | 30073598 | 30073798 |
| 7 | 30105397 | 30290480 - | NM_001081028 | Sipa1l3  | 8427   | 30281853 | 30282053 |
| 7 | 30105397 | 30290480 - | NM_001081028 | Sipa1l3  | 63264  | 30227016 | 30227216 |
| 7 | 30105397 | 30290480 - | NM_001081028 | Sipa1l3  | 10244  | 30280036 | 30280236 |
| 7 | 30105397 | 30290480 - | NM_001081028 | Sipa1l3  | 35491  | 30254789 | 30254989 |
| 7 | 30105397 | 30290480 - | NM_001081028 | Sipa1l3  | 180436 | 30109844 | 30110044 |
| 7 | 30105397 | 30290480 - | NM_001081028 | Sipa1l3  | 165931 | 30124349 | 30124549 |
| 7 | 30601091 | 30617062 + | NM_001145880 | Zfp790   | 178    | 30601269 | 30601469 |
| 7 | 30601091 | 30617062 + | NM_146185    | Zfp790   | 178    | 30601269 | 30601469 |
| 7 | 30678356 | 30691124 - | NM_001037707 | Zfp27    | -156   | 30691280 | 30691480 |
| 7 | 30678356 | 30691552 - | NM_001285797 | Zfp27    | 72     | 30691280 | 30691480 |
| 7 | 30678356 | 30691552 - | NM_001285798 | Zfp27    | 72     | 30691280 | 30691480 |
| 7 | 30678356 | 30691124 - | NM_011754    | Zfp27    | -156   | 30691280 | 30691480 |
| 7 | 30691528 | 30691587 + | NR_106128    | Mir7668  | -48    | 30691280 | 30691480 |
| 7 | 30693536 | 30701833 + | NM_001243908 | Zfp383   | -2056  | 30691280 | 30691480 |
| 7 | 30946287 | 30954747 - | NM_011980    | Zfp146   | -144   | 30954891 | 30955091 |
| 7 | 30954941 | 30965229 + | NM_001033540 | Gm5113   | 0      | 30954891 | 30955091 |
| 7 | 30969190 | 30971050 + | NM_009944    | Cox7a1   | -98    | 30968892 | 30969092 |
| 7 | 30971961 | 30980068 - | NM_009795    | Capns1   | -3435  | 30983503 | 30983703 |
| 7 | 30971961 | 30980068 - | NM_009795    | Capns1   | -9414  | 30989482 | 30989682 |
| 7 | 31106428 | 31107395 - | NM_001033140 | Sdhaf1   | 481    | 31106714 | 31106914 |
| 7 | 31245077 | 31273629 + | NM_019459    | Nphs1    | 13191  | 31258268 | 31258468 |
| 7 | 31247183 | 31250611 - | NR_004443    | Nphs1os  | -7657  | 31258268 | 31258468 |
| 7 | 31278677 | 31298422 + | NM_019546    | Prodh2   | -3041  | 31275436 | 31275636 |
| 7 | 31426014 | 31435248 - | NM_133693    | Rbm42    | -5290  | 31440538 | 31440738 |
| 7 | 31438727 | 31450014 - | NM_027999    | Haus5    | 9276   | 31440538 | 31440738 |
| 7 | 31497228 | 31510554 + | NM_001290627 | Atp4a    | -692   | 31496336 | 31496536 |
| 7 | 31497228 | 31510554 + | NM_001290627 | Atp4a    | -5432  | 31491596 | 31491796 |
| 7 | 31497228 | 31510554 + | NM_018731    | Atp4a    | -692   | 31496336 | 31496536 |

|   |          |            |              |               |        |          |          |
|---|----------|------------|--------------|---------------|--------|----------|----------|
| 7 | 31497228 | 31510554 + | NM_018731    | Atp4a         | -5432  | 31491596 | 31491796 |
| 7 | 34880450 | 34885857 + | NM_001099330 | Scgb1b30      | -8293  | 34871957 | 34872157 |
| 7 | 34969516 | 34981667 - | NM_026549    | Pdcd2l        | -6921  | 34988588 | 34988788 |
| 7 | 34969516 | 34981667 - | NM_026549    | Pdcd2l        | -79    | 34981746 | 34981946 |
| 7 | 34986346 | 35015356 - | NM_008155    | Gpi1          | 1340   | 35013816 | 35014016 |
| 7 | 34986346 | 35015356 - | NM_008155    | Gpi1          | 26568  | 34988588 | 34988788 |
| 7 | 34986346 | 35015356 - | NM_008155    | Gpi1          | 3858   | 35011298 | 35011498 |
| 7 | 35697426 | 35829728 + | NM_008820    | Pepd          | 25405  | 35722831 | 35723031 |
| 7 | 35697426 | 35829728 + | NM_008820    | Pepd          | 117099 | 35814525 | 35814725 |
| 7 | 35697426 | 35829728 + | NM_008820    | Pepd          | -5334  | 35691892 | 35692092 |
| 7 | 35831441 | 35841586 - | NM_009884    | Cebpg         | -4041  | 35845627 | 35845827 |
| 7 | 35904312 | 35906948 + | NM_001287514 | Cebpa         | -2532  | 35901580 | 35901780 |
| 7 | 35904312 | 35906948 + | NM_001287515 | Cebpa         | -2532  | 35901580 | 35901780 |
| 7 | 35904312 | 35906948 + | NM_001287521 | Cebpa         | -2532  | 35901580 | 35901780 |
| 7 | 35904312 | 35906948 + | NM_001287523 | Cebpa         | -2532  | 35901580 | 35901780 |
| 7 | 35904312 | 35906952 + | NM_007678    | Cebpa         | -2532  | 35901580 | 35901780 |
| 7 | 36061563 | 36103460 - | NM_026181    | Gpatch1       | -4414  | 36107874 | 36108074 |
| 7 | 36119256 | 36177307 + | NM_027897    | Rhpn2         | 13831  | 36133087 | 36133287 |
| 7 | 36119256 | 36177307 + | NM_027897    | Rhpn2         | 38617  | 36157873 | 36158073 |
| 7 | 36119256 | 36177307 + | NM_027897    | Rhpn2         | 21109  | 36140365 | 36140565 |
| 7 | 36119256 | 36177307 + | NM_027897    | Rhpn2         | 10665  | 36129921 | 36130121 |
| 7 | 36119256 | 36177307 + | NM_027897    | Rhpn2         | 12050  | 36131306 | 36131506 |
| 7 | 36119256 | 36177307 + | NM_027897    | Rhpn2         | -442   | 36118614 | 36118814 |
| 7 | 36182112 | 36223704 + | NM_028120    | Cep89         | 28162  | 36210274 | 36210474 |
| 7 | 36234111 | 36251054 + | NM_001199015 | Slc7a9        | 11402  | 36245513 | 36245713 |
| 7 | 36234117 | 36251054 + | NM_001199016 | Slc7a9        | 11396  | 36245513 | 36245713 |
| 7 | 36234198 | 36251054 + | NM_021291    | Slc7a9        | 11315  | 36245513 | 36245713 |
| 7 | 36470519 | 36539474 - | NM_178704    | Dpy19l3       | -386   | 36539860 | 36540060 |
| 7 | 38745011 | 38804572 - | NM_011274    | Uri1          | 768    | 38803604 | 38803804 |
| 7 | 38968236 | 38982585 + | NM_001085385 | 1600014C10Rik | 953    | 38969189 | 38969389 |

|   |          |            |              |               |       |          |          |
|---|----------|------------|--------------|---------------|-------|----------|----------|
| 7 | 38968806 | 38982585 + | NM_028166    | 1600014C10Rik | 383   | 38969189 | 38969389 |
| 7 | 39005673 | 39013014 - | NM_024413    | Plekhf1       | 1056  | 39011758 | 39011958 |
| 7 | 50699442 | 50713171 + | NM_026695    | Etfb          | 9786  | 50709228 | 50709428 |
| 7 | 50699442 | 50713171 + | NM_026695    | Etfb          | 0     | 50699404 | 50699604 |
| 7 | 50699442 | 50713171 + | NM_026695    | Etfb          | 3672  | 50703114 | 50703314 |
| 7 | 50699442 | 50713171 + | NR_075104    | Etfb          | 9786  | 50709228 | 50709428 |
| 7 | 50699442 | 50713171 + | NR_075104    | Etfb          | 0     | 50699404 | 50699604 |
| 7 | 50699442 | 50713171 + | NR_075104    | Etfb          | 3672  | 50703114 | 50703314 |
| 7 | 50712867 | 50712940 + | NR_106018    | Mir7051       | -3439 | 50709228 | 50709428 |
| 7 | 50712867 | 50712940 + | NR_106018    | Mir7051       | -9553 | 50703114 | 50703314 |
| 7 | 50718603 | 50727385 + | NM_001290316 | Vsig10l       | -9175 | 50709228 | 50709428 |
| 7 | 50718603 | 50727385 + | NM_001290316 | Vsig10l       | 2390  | 50720993 | 50721193 |
| 7 | 50890109 | 50904665 + | NM_028236    | Ceacam18      | 1171  | 50891280 | 50891480 |
| 7 | 50890109 | 50904665 + | NM_028236    | Ceacam18      | -33   | 50889876 | 50890076 |
| 7 | 50906440 | 50915532 - | NM_031181    | Siglece       | -9128 | 50924660 | 50924860 |
| 7 | 50927401 | 50933668 + | NM_145582    | Ctu1          | -2541 | 50924660 | 50924860 |
| 7 | 50945788 | 50950906 + | NM_174866    | Klk14         | -4955 | 50940633 | 50940833 |
| 7 | 51206042 | 51210309 + | NM_008457    | Klk1b8        | -2459 | 51203383 | 51203583 |
| 7 | 51485300 | 51491493 - | NR_029436    | 1700028J19Rik | -9878 | 51501371 | 51501571 |
| 7 | 51502092 | 51507690 + | NM_025880    | 2410002F23Rik | -521  | 51501371 | 51501571 |
| 7 | 51505225 | 51505309 + | NR_028534    | Snord88c      | -3654 | 51501371 | 51501571 |
| 7 | 51505520 | 51505592 + | NR_028533    | Snord88a      | -3949 | 51501371 | 51501571 |
| 7 | 51639496 | 51655401 + | NM_001114116 | Syt3          | 14672 | 51654168 | 51654368 |
| 7 | 51639496 | 51655401 + | NM_016663    | Syt3          | 14672 | 51654168 | 51654368 |
| 7 | 51861173 | 51920874 - | NM_001271538 | Myh14         | 58903 | 51861771 | 51861971 |
| 7 | 51861173 | 51926214 - | NM_001271540 | Myh14         | 64243 | 51861771 | 51861971 |
| 7 | 51861173 | 51920874 - | NM_028021    | Myh14         | 58903 | 51861771 | 51861971 |
| 7 | 52096146 | 52104450 - | NM_001042655 | Tbc1d17       | -628  | 52105078 | 52105278 |
| 7 | 52096146 | 52104450 - | NM_001042655 | Tbc1d17       | 106   | 52104144 | 52104344 |
| 7 | 52104594 | 52110792 + | NM_001290695 | Akt1s1        | 484   | 52105078 | 52105278 |

|   |          |            |              |        |       |          |          |
|---|----------|------------|--------------|--------|-------|----------|----------|
| 7 | 52104594 | 52110792 + | NM_001290695 | Akt1s1 | -250  | 52104144 | 52104344 |
| 7 | 52104594 | 52110792 + | NM_026270    | Akt1s1 | 484   | 52105078 | 52105278 |
| 7 | 52104594 | 52110792 + | NM_026270    | Akt1s1 | -250  | 52104144 | 52104344 |
| 7 | 52105005 | 52110792 + | NM_001290694 | Akt1s1 | 73    | 52105078 | 52105278 |
| 7 | 52105005 | 52110792 + | NM_001290694 | Akt1s1 | -661  | 52104144 | 52104344 |
| 7 | 52105069 | 52105142 + | NR_030488    | Mir707 | 9     | 52105078 | 52105278 |
| 7 | 52105069 | 52105142 + | NR_030488    | Mir707 | -725  | 52104144 | 52104344 |
| 7 | 52105377 | 52110792 + | NM_001253920 | Akt1s1 | -99   | 52105078 | 52105278 |
| 7 | 52105377 | 52110792 + | NM_001253920 | Akt1s1 | -1033 | 52104144 | 52104344 |
| 7 | 52112516 | 52118300 + | NM_001290764 | Pnkp   | -7238 | 52105078 | 52105278 |
| 7 | 52112516 | 52118300 + | NM_001290764 | Pnkp   | -8172 | 52104144 | 52104344 |
| 7 | 52112516 | 52118300 + | NM_001290766 | Pnkp   | -7238 | 52105078 | 52105278 |
| 7 | 52112516 | 52118300 + | NM_001290766 | Pnkp   | -8172 | 52104144 | 52104344 |
| 7 | 52112516 | 52118300 + | NM_021549    | Pnkp   | -7238 | 52105078 | 52105278 |
| 7 | 52112516 | 52118300 + | NM_021549    | Pnkp   | -8172 | 52104144 | 52104344 |
| 7 | 52112773 | 52118300 + | NM_001290767 | Pnkp   | -7495 | 52105078 | 52105278 |
| 7 | 52112773 | 52118300 + | NM_001290767 | Pnkp   | -8429 | 52104144 | 52104344 |
| 7 | 52594496 | 52622390 - | NM_029741    | Ppfia3 | 7497  | 52614693 | 52614893 |
| 7 | 52621533 | 52623319 + | NR_015480    | Mtag2  | -6640 | 52614693 | 52614893 |
| 7 | 52622603 | 52623319 + | NR_027802    | Mtag2  | -7710 | 52614693 | 52614893 |
| 7 | 52717065 | 52722269 - | NM_007527    | Bax    | -8585 | 52730854 | 52731054 |
| 7 | 52728933 | 52744167 - | NM_027903    | Dhdh   | 13113 | 52730854 | 52731054 |
| 7 | 52741632 | 52778298 + | NM_001290996 | Tulp2  | 22399 | 52764031 | 52764231 |
| 7 | 52741632 | 52778298 + | NM_001290996 | Tulp2  | 24199 | 52765831 | 52766031 |
| 7 | 52741633 | 52777758 + | NM_001290999 | Tulp2  | 22398 | 52764031 | 52764231 |
| 7 | 52741633 | 52777758 + | NM_001290999 | Tulp2  | 24198 | 52765831 | 52766031 |
| 7 | 52748044 | 52765779 - | NM_001163662 | Nucb1  | 1548  | 52764031 | 52764231 |
| 7 | 52748044 | 52765779 - | NM_001163662 | Nucb1  | -52   | 52765831 | 52766031 |
| 7 | 52748044 | 52765779 - | NM_008749    | Nucb1  | 1548  | 52764031 | 52764231 |
| 7 | 52748044 | 52765779 - | NM_008749    | Nucb1  | -52   | 52765831 | 52766031 |

|   |          |            |              |               |       |          |          |
|---|----------|------------|--------------|---------------|-------|----------|----------|
| 7 | 52769076 | 52778298 + | NM_001045555 | Tulp2         | -4845 | 52764031 | 52764231 |
| 7 | 52769076 | 52778298 + | NM_001045555 | Tulp2         | -3045 | 52765831 | 52766031 |
| 7 | 52769076 | 52777758 + | NM_008807    | Tulp2         | -4845 | 52764031 | 52764231 |
| 7 | 52769076 | 52777758 + | NM_008807    | Tulp2         | -3045 | 52765831 | 52766031 |
| 7 | 52769972 | 52777758 + | NM_001290998 | Tulp2         | -5741 | 52764031 | 52764231 |
| 7 | 52769972 | 52777758 + | NM_001290998 | Tulp2         | -3941 | 52765831 | 52766031 |
| 7 | 52823165 | 52830547 - | NR_038165    | 0610005C13Rik | 884   | 52829463 | 52829663 |
| 7 | 52823165 | 52830547 - | NR_038166    | 0610005C13Rik | 884   | 52829463 | 52829663 |
| 7 | 52825523 | 52845081 + | NM_009737    | Bcat2         | 3940  | 52829463 | 52829663 |
| 7 | 52826649 | 52845081 + | NM_001243052 | Bcat2         | 2814  | 52829463 | 52829663 |
| 7 | 52828240 | 52845081 + | NM_001243053 | Bcat2         | 1223  | 52829463 | 52829663 |
| 7 | 52869260 | 52870861 - | NM_020013    | Fgf21         | -8081 | 52878942 | 52879142 |
| 7 | 52877181 | 52882613 + | NM_001018013 | Izumo1        | 1761  | 52878942 | 52879142 |
| 7 | 52882907 | 52894463 + | NM_028544    | Rasip1        | -3765 | 52878942 | 52879142 |
| 7 | 52903961 | 52921765 - | NM_001271993 | Fut2          | -3072 | 52924837 | 52925037 |
| 7 | 52903961 | 52921765 - | NM_018876    | Fut2          | -3072 | 52924837 | 52925037 |
| 7 | 52960617 | 52965574 + | NM_016974    | Dbp           | 2866  | 52963483 | 52963683 |
| 7 | 52964833 | 52973373 - | NM_001172561 | Sphk2         | -3630 | 52977003 | 52977203 |
| 7 | 52964833 | 52973373 - | NM_001172561 | Sphk2         | 5232  | 52967941 | 52968141 |
| 7 | 52964833 | 52970578 - | NM_020011    | Sphk2         | -6425 | 52977003 | 52977203 |
| 7 | 52964833 | 52970578 - | NM_020011    | Sphk2         | 2437  | 52967941 | 52968141 |
| 7 | 52964833 | 52973373 - | NM_203280    | Sphk2         | -3630 | 52977003 | 52977203 |
| 7 | 52964833 | 52973373 - | NM_203280    | Sphk2         | 5232  | 52967941 | 52968141 |
| 7 | 52973441 | 52976206 + | NM_009077    | Rpl18         | -9758 | 52963483 | 52963683 |
| 7 | 52973441 | 52976206 + | NM_009077    | Rpl18         | -5300 | 52967941 | 52968141 |
| 7 | 52976590 | 52984863 + | NM_001033170 | Fam83e        | 413   | 52977003 | 52977203 |
| 7 | 52976590 | 52984863 + | NM_001033170 | Fam83e        | -8449 | 52967941 | 52968141 |
| 7 | 52985353 | 53014926 - | NM_017465    | Sult2b1       | 2167  | 53012559 | 53012759 |
| 7 | 53087853 | 53122052 - | NM_008172    | Grin2d        | -3    | 53122055 | 53122255 |
| 7 | 53087853 | 53122052 - | NM_008172    | Grin2d        | -1489 | 53123541 | 53123741 |



|   |          |            |              |         |        |          |          |
|---|----------|------------|--------------|---------|--------|----------|----------|
| 7 | 53128210 | 53139097 + | NM_133950    | Kdelr1  | -5955  | 53122055 | 53122255 |
| 7 | 53128210 | 53139097 + | NM_133950    | Kdelr1  | -4469  | 53123541 | 53123741 |
| 7 | 53142215 | 53152082 - | NM_001291064 | Syngn4  | -4923  | 53157005 | 53157205 |
| 7 | 53142215 | 53152082 - | NM_021482    | Syngn4  | -4923  | 53157005 | 53157205 |
| 7 | 53152439 | 53172784 + | NM_144801    | Tmem143 | 4566   | 53157005 | 53157205 |
| 7 | 53183768 | 53204327 + | NM_001033243 | Ccdc114 | 12252  | 53196020 | 53196220 |
| 7 | 53231750 | 53285657 - | NM_018795    | Abcc6   | -891   | 53286548 | 53286748 |
| 7 | 53231750 | 53285657 - | NM_018795    | Abcc6   | -7243  | 53292900 | 53293100 |
| 7 | 53231750 | 53285657 - | NM_018795    | Abcc6   | 246    | 53285211 | 53285411 |
| 7 | 53231750 | 53285657 - | NM_018795    | Abcc6   | 1323   | 53284134 | 53284334 |
| 7 | 53289066 | 53339583 + | NM_153057    | Nomo1   | -2318  | 53286548 | 53286748 |
| 7 | 53289066 | 53339583 + | NM_153057    | Nomo1   | 39535  | 53328601 | 53328801 |
| 7 | 53289066 | 53339583 + | NM_153057    | Nomo1   | 3834   | 53292900 | 53293100 |
| 7 | 53289066 | 53339583 + | NM_153057    | Nomo1   | -3655  | 53285211 | 53285411 |
| 7 | 53289066 | 53339583 + | NM_153057    | Nomo1   | -4732  | 53284134 | 53284334 |
| 7 | 54245766 | 54263785 - | NM_175318    | Spty2d1 | -381   | 54264166 | 54264366 |
| 7 | 54245766 | 54263785 - | NM_175318    | Spty2d1 | 0      | 54263671 | 54263871 |
| 7 | 54306010 | 54310147 + | NM_026436    | Tmem86a | -3624  | 54302186 | 54302386 |
| 7 | 56121799 | 56136412 - | NM_001013368 | E2f8    | 3110   | 56133102 | 56133302 |
| 7 | 56214443 | 56865459 + | NM_001111016 | Nav2    | 52810  | 56267253 | 56267453 |
| 7 | 56214443 | 56865459 + | NM_001111016 | Nav2    | 332480 | 56546923 | 56547123 |
| 7 | 56214443 | 56865459 + | NM_001111016 | Nav2    | 324685 | 56539128 | 56539328 |
| 7 | 56501559 | 56865459 + | NM_175272    | Nav2    | 45364  | 56546923 | 56547123 |
| 7 | 56501559 | 56865459 + | NM_175272    | Nav2    | 37569  | 56539128 | 56539328 |
| 7 | 59134515 | 59249829 + | NM_008087    | Gas2    | 8749   | 59143264 | 59143464 |
| 7 | 63097441 | 63188004 + | NM_001164661 | Cyfip1  | 70074  | 63167515 | 63167715 |
| 7 | 63097441 | 63188004 + | NM_001164661 | Cyfip1  | 17395  | 63114836 | 63115036 |
| 7 | 63097441 | 63188004 + | NM_001164662 | Cyfip1  | 70074  | 63167515 | 63167715 |
| 7 | 63097441 | 63188004 + | NM_001164662 | Cyfip1  | 17395  | 63114836 | 63115036 |
| 7 | 63097441 | 63188004 + | NM_011370    | Cyfip1  | 70074  | 63167515 | 63167715 |

|   |          |            |              |               |        |          |          |
|---|----------|------------|--------------|---------------|--------|----------|----------|
| 7 | 63097441 | 63188004 + | NM_011370    | Cyfp1         | 17395  | 63114836 | 63115036 |
| 7 | 63186636 | 63217864 - | NM_001256130 | Nipa2         | 20496  | 63197168 | 63197368 |
| 7 | 63186636 | 63217864 - | NM_001256130 | Nipa2         | 27028  | 63190636 | 63190836 |
| 7 | 63186636 | 63217864 - | NM_001256131 | Nipa2         | 20496  | 63197168 | 63197368 |
| 7 | 63186636 | 63217864 - | NM_001256131 | Nipa2         | 27028  | 63190636 | 63190836 |
| 7 | 63186636 | 63217864 - | NM_001256132 | Nipa2         | 20496  | 63197168 | 63197368 |
| 7 | 63186636 | 63217864 - | NM_001256132 | Nipa2         | 27028  | 63190636 | 63190836 |
| 7 | 63186636 | 63217864 - | NM_001256133 | Nipa2         | 20496  | 63197168 | 63197368 |
| 7 | 63186636 | 63217864 - | NM_001256133 | Nipa2         | 27028  | 63190636 | 63190836 |
| 7 | 63186636 | 63217864 - | NM_023647    | Nipa2         | 20496  | 63197168 | 63197368 |
| 7 | 63186636 | 63217864 - | NM_023647    | Nipa2         | 27028  | 63190636 | 63190836 |
| 7 | 66484120 | 66545189 + | NM_173010    | Ube3a         | 52858  | 66536978 | 66537178 |
| 7 | 66484122 | 66562098 + | NM_001033962 | Ube3a         | 52856  | 66536978 | 66537178 |
| 7 | 66484122 | 66562098 + | NM_011668    | Ube3a         | 52856  | 66536978 | 66537178 |
| 7 | 71031237 | 71083802 - | NM_021366    | Klf13         | 41749  | 71041853 | 71042053 |
| 7 | 71031237 | 71083802 - | NM_021366    | Klf13         | 21266  | 71062336 | 71062536 |
| 7 | 71031237 | 71083802 - | NM_021366    | Klf13         | -8677  | 71092479 | 71092679 |
| 7 | 71031237 | 71083802 - | NM_021366    | Klf13         | 32982  | 71050620 | 71050820 |
| 7 | 71061743 | 71065426 + | NM_001256311 | E030018B13Rik | 593    | 71062336 | 71062536 |
| 7 | 71298721 | 71414646 + | NM_001039104 | Trpm1         | 1930   | 71300651 | 71300851 |
| 7 | 71900982 | 72301415 - | NM_183087    | Fam189a1      | 108034 | 72193181 | 72193381 |
| 7 | 73007022 | 73195273 + | NM_001291184 | Pcsk6         | 83529  | 73090551 | 73090751 |
| 7 | 73007022 | 73195273 + | NM_001291184 | Pcsk6         | 96171  | 73103193 | 73103393 |
| 7 | 73007022 | 73195273 + | NM_001291184 | Pcsk6         | 11420  | 73018442 | 73018642 |
| 7 | 73007022 | 73195273 + | NM_011048    | Pcsk6         | 83529  | 73090551 | 73090751 |
| 7 | 73007022 | 73195273 + | NM_011048    | Pcsk6         | 96171  | 73103193 | 73103393 |
| 7 | 73007022 | 73195273 + | NM_011048    | Pcsk6         | 11420  | 73018442 | 73018642 |
| 7 | 73403633 | 73533228 - | NM_146191    | Lrrk1         | 77159  | 73455869 | 73456069 |
| 7 | 73403633 | 73533228 - | NM_146191    | Lrrk1         | 78831  | 73454197 | 73454397 |
| 7 | 73789457 | 73834448 - | NM_080443    | Asb7          | -5071  | 73839519 | 73839719 |

|   |          |            |              |               |        |          |          |
|---|----------|------------|--------------|---------------|--------|----------|----------|
| 7 | 73789457 | 73834448 - | NM_080443    | Asb7          | 26366  | 73807882 | 73808082 |
| 7 | 73789457 | 73834448 - | NR_003961    | Asb7          | -5071  | 73839519 | 73839719 |
| 7 | 73789457 | 73834448 - | NR_003961    | Asb7          | 26366  | 73807882 | 73808082 |
| 7 | 73834775 | 73862143 + | NM_001191001 | Lins          | 4744   | 73839519 | 73839719 |
| 7 | 73834775 | 73862143 + | NM_152815    | Lins          | 4744   | 73839519 | 73839719 |
| 7 | 73834775 | 73862143 + | NR_034030    | Lins          | 4744   | 73839519 | 73839719 |
| 7 | 73984621 | 74297512 + | NM_001033877 | Adamts17      | 167118 | 74151739 | 74151939 |
| 7 | 74348968 | 74367345 - | NR_131044    | 1700112J16Rik | 5815   | 74361330 | 74361530 |
| 7 | 74367430 | 74373355 + | NM_175215    | Lysmd4        | -5900  | 74361330 | 74361530 |
| 7 | 74367502 | 74373355 + | NM_001191051 | Lysmd4        | -5972  | 74361330 | 74361530 |
| 7 | 74376049 | 74517745 - | NM_001033713 | Mef2a         | 32947  | 74484598 | 74484798 |
| 7 | 74376049 | 74517745 - | NM_001033713 | Mef2a         | 112757 | 74404788 | 74404988 |
| 7 | 74376049 | 74517745 - | NM_001033713 | Mef2a         | 76177  | 74441368 | 74441568 |
| 7 | 74376049 | 74517745 - | NM_001291191 | Mef2a         | 32947  | 74484598 | 74484798 |
| 7 | 74376049 | 74517745 - | NM_001291191 | Mef2a         | 112757 | 74404788 | 74404988 |
| 7 | 74376049 | 74517745 - | NM_001291191 | Mef2a         | 76177  | 74441368 | 74441568 |
| 7 | 74376049 | 74517745 - | NM_001291192 | Mef2a         | 32947  | 74484598 | 74484798 |
| 7 | 74376049 | 74517745 - | NM_001291192 | Mef2a         | 112757 | 74404788 | 74404988 |
| 7 | 74376049 | 74517745 - | NM_001291192 | Mef2a         | 76177  | 74441368 | 74441568 |
| 7 | 74376049 | 74517745 - | NM_001291195 | Mef2a         | 32947  | 74484598 | 74484798 |
| 7 | 74376049 | 74517745 - | NM_001291195 | Mef2a         | 112757 | 74404788 | 74404988 |
| 7 | 74376049 | 74517745 - | NM_001291195 | Mef2a         | 76177  | 74441368 | 74441568 |
| 7 | 74376049 | 74517745 - | NM_001291196 | Mef2a         | 32947  | 74484598 | 74484798 |
| 7 | 74376049 | 74517745 - | NM_001291196 | Mef2a         | 112757 | 74404788 | 74404988 |
| 7 | 74376049 | 74517745 - | NM_001291196 | Mef2a         | 76177  | 74441368 | 74441568 |
| 7 | 74792296 | 74871463 + | NM_001168475 | Ttc23         | 25389  | 74817685 | 74817885 |
| 7 | 74792296 | 74871463 + | NM_001168476 | Ttc23         | 25389  | 74817685 | 74817885 |
| 7 | 74792296 | 74871463 + | NM_025905    | Ttc23         | 25389  | 74817685 | 74817885 |
| 7 | 75381494 | 75409120 - | NM_030101    | Pgpep1l       | -9420  | 75418540 | 75418740 |
| 7 | 75411225 | 75421481 - | NR_040340    | Gm16157       | 2741   | 75418540 | 75418740 |

|   |          |            |              |               |        |          |          |
|---|----------|------------|--------------|---------------|--------|----------|----------|
| 7 | 75411225 | 75419985 - | NR_040341    | Gm16157       | 1245   | 75418540 | 75418740 |
| 7 | 75418725 | 75507977 + | NM_001013811 | Fam169b       | 0      | 75418540 | 75418740 |
| 7 | 80520406 | 80564786 + | NM_177740    | Rgma          | 29355  | 80549761 | 80549961 |
| 7 | 80571538 | 80686633 - | NM_001081345 | Chd2          | 50360  | 80636073 | 80636273 |
| 7 | 80684684 | 80703282 - | NR_037569    | 1810026B05Rik | -465   | 80703747 | 80703947 |
| 7 | 82600420 | 82899496 + | NM_029332    | Akap13        | 24213  | 82624633 | 82624833 |
| 7 | 82600420 | 82899496 + | NM_029332    | Akap13        | 154520 | 82754940 | 82755140 |
| 7 | 82600420 | 82899496 + | NM_029332    | Akap13        | 174182 | 82774602 | 82774802 |
| 7 | 82600420 | 82899496 + | NM_029332    | Akap13        | 54044  | 82654464 | 82654664 |
| 7 | 83374773 | 84269585 + | NM_001199224 | Agbl1         | 253985 | 83628758 | 83628958 |
| 7 | 86278654 | 86293947 - | NM_001045489 | Mfge8         | -516   | 86294463 | 86294663 |
| 7 | 86278654 | 86293947 - | NM_008594    | Mfge8         | -516   | 86294463 | 86294663 |
| 7 | 86418152 | 86506488 + | NM_018811    | Abhd2         | -789   | 86417163 | 86417363 |
| 7 | 86418152 | 86506488 + | NM_018811    | Abhd2         | 45135  | 86463287 | 86463487 |
| 7 | 86418152 | 86506488 + | NM_018811    | Abhd2         | 80246  | 86498398 | 86498598 |
| 7 | 86418152 | 86506488 + | NM_018811    | Abhd2         | 55639  | 86473791 | 86473991 |
| 7 | 86418152 | 86506488 + | NM_018811    | Abhd2         | 38269  | 86456421 | 86456621 |
| 7 | 86418152 | 86506488 + | NM_018811    | Abhd2         | 40604  | 86458756 | 86458956 |
| 7 | 86418152 | 86506488 + | NM_018811    | Abhd2         | 26544  | 86444696 | 86444896 |
| 7 | 86418152 | 86506488 + | NM_018811    | Abhd2         | -5159  | 86412793 | 86412993 |
| 7 | 86594269 | 86611160 - | NM_017462    | Polg          | -86    | 86611246 | 86611446 |
| 7 | 86866050 | 86877663 - | NM_001113471 | Plin1         | -3860  | 86881523 | 86881723 |
| 7 | 86866050 | 86877663 - | NM_001113471 | Plin1         | 4294   | 86873169 | 86873369 |
| 7 | 86866050 | 86877663 - | NM_175640    | Plin1         | -3860  | 86881523 | 86881723 |
| 7 | 86866050 | 86877663 - | NM_175640    | Plin1         | 4294   | 86873169 | 86873369 |
| 7 | 86882150 | 86887912 - | NM_011068    | Pex11a        | -8279  | 86896191 | 86896391 |
| 7 | 86888049 | 86930837 + | NM_001037927 | Wdr93         | 8142   | 86896191 | 86896391 |
| 7 | 86888049 | 86930837 + | NM_001037927 | Wdr93         | -6326  | 86881523 | 86881723 |
| 7 | 87020211 | 87065527 - | NM_009682    | Ap3s2         | 31867  | 87033460 | 87033660 |
| 7 | 87020211 | 87065527 - | NM_009682    | Ap3s2         | 17205  | 87048122 | 87048322 |

|   |          |            |              |         |       |          |          |
|---|----------|------------|--------------|---------|-------|----------|----------|
| 7 | 87020211 | 87065527 - | NM_009682    | Ap3s2   | -9794 | 87075321 | 87075521 |
| 7 | 87020211 | 87065527 - | NM_009682    | Ap3s2   | 24460 | 87040867 | 87041067 |
| 7 | 87020211 | 87065527 - | NM_009682    | Ap3s2   | 19582 | 87045745 | 87045945 |
| 7 | 87020211 | 87065527 - | NM_009682    | Ap3s2   | 27888 | 87037439 | 87037639 |
| 7 | 87070245 | 87080151 - | NM_027420    | Arpin   | 4630  | 87075321 | 87075521 |
| 7 | 87169700 | 87237638 + | NM_001145999 | Zfp710  | 60021 | 87229721 | 87229921 |
| 7 | 87169700 | 87237638 + | NM_001145999 | Zfp710  | 27403 | 87197103 | 87197303 |
| 7 | 87169700 | 87237638 + | NM_001145999 | Zfp710  | 36898 | 87206598 | 87206798 |
| 7 | 87169700 | 87237638 + | NM_001145999 | Zfp710  | 35295 | 87204995 | 87205195 |
| 7 | 87169700 | 87237638 + | NM_001145999 | Zfp710  | 27064 | 87196764 | 87196964 |
| 7 | 87169700 | 87237638 + | NM_001145999 | Zfp710  | 10999 | 87180699 | 87180899 |
| 7 | 87169700 | 87237638 + | NM_001146000 | Zfp710  | 60021 | 87229721 | 87229921 |
| 7 | 87169700 | 87237638 + | NM_001146000 | Zfp710  | 27403 | 87197103 | 87197303 |
| 7 | 87169700 | 87237638 + | NM_001146000 | Zfp710  | 36898 | 87206598 | 87206798 |
| 7 | 87169700 | 87237638 + | NM_001146000 | Zfp710  | 35295 | 87204995 | 87205195 |
| 7 | 87169700 | 87237638 + | NM_001146000 | Zfp710  | 27064 | 87196764 | 87196964 |
| 7 | 87169700 | 87237638 + | NM_001146000 | Zfp710  | 10999 | 87180699 | 87180899 |
| 7 | 87171114 | 87237638 + | NM_175433    | Zfp710  | 58607 | 87229721 | 87229921 |
| 7 | 87171114 | 87237638 + | NM_175433    | Zfp710  | 25989 | 87197103 | 87197303 |
| 7 | 87171114 | 87237638 + | NM_175433    | Zfp710  | 35484 | 87206598 | 87206798 |
| 7 | 87171114 | 87237638 + | NM_175433    | Zfp710  | 33881 | 87204995 | 87205195 |
| 7 | 87171114 | 87237638 + | NM_175433    | Zfp710  | 25650 | 87196764 | 87196964 |
| 7 | 87171114 | 87237638 + | NM_175433    | Zfp710  | 9585  | 87180699 | 87180899 |
| 7 | 87207596 | 87220144 - | NR_045695    | Gm21057 | -9577 | 87229721 | 87229921 |
| 7 | 87331727 | 87371411 + | NM_013659    | Sema4b  | -508  | 87331019 | 87331219 |
| 7 | 87331727 | 87371411 + | NM_013659    | Sema4b  | 22103 | 87353830 | 87354030 |
| 7 | 87331727 | 87371411 + | NM_013659    | Sema4b  | 1198  | 87332925 | 87333125 |
| 7 | 87331727 | 87371411 + | NM_013659    | Sema4b  | -5338 | 87326189 | 87326389 |
| 7 | 87414541 | 87436466 + | NM_178070    | Vps33b  | 11760 | 87426301 | 87426501 |
| 7 | 87414541 | 87436466 + | NM_178070    | Vps33b  | 13968 | 87428509 | 87428709 |

|   |          |            |              |               |       |          |          |
|---|----------|------------|--------------|---------------|-------|----------|----------|
| 7 | 87856469 | 87948218 - | NM_016721    | Iqgap1        | -362  | 87948580 | 87948780 |
| 7 | 87856469 | 87948218 - | NM_016721    | Iqgap1        | 23999 | 87924019 | 87924219 |
| 7 | 88006994 | 88021400 + | NM_009553    | Zscan2        | 4512  | 88011506 | 88011706 |
| 7 | 88035609 | 88046156 - | NM_028026    | Wdr73         | 163   | 88045793 | 88045993 |
| 7 | 88035609 | 88046156 - | NR_027976    | Wdr73         | 163   | 88045793 | 88045993 |
| 7 | 88060265 | 88092437 - | NM_019951    | Sec11a        | 7473  | 88084764 | 88084964 |
| 7 | 88060265 | 88092437 - | NM_019951    | Sec11a        | 27827 | 88064410 | 88064610 |
| 7 | 88138570 | 88190049 + | NM_178707    | Zfp592        | -6939 | 88131431 | 88131631 |
| 7 | 88202486 | 88250499 + | NM_054085    | Alpk3         | 393   | 88202879 | 88203079 |
| 7 | 88259685 | 88315303 + | NM_001004184 | Slc28a1       | 9934  | 88269619 | 88269819 |
| 7 | 88259685 | 88315303 + | NM_001004184 | Slc28a1       | 8959  | 88268644 | 88268844 |
| 7 | 88679240 | 88711868 - | NM_172904    | Fsd2          | -5854 | 88717722 | 88717922 |
| 7 | 88716178 | 88741723 + | NM_001004185 | Whamm         | 1544  | 88717722 | 88717922 |
| 7 | 88745367 | 88851812 - | NM_001164086 | Homer2        | 19016 | 88832596 | 88832796 |
| 7 | 88745367 | 88851812 - | NM_001164086 | Homer2        | 18151 | 88833461 | 88833661 |
| 7 | 88745367 | 88851812 - | NM_001164086 | Homer2        | 24075 | 88827537 | 88827737 |
| 7 | 88745367 | 88837852 - | NM_001164087 | Homer2        | 5056  | 88832596 | 88832796 |
| 7 | 88745367 | 88837852 - | NM_001164087 | Homer2        | 4191  | 88833461 | 88833661 |
| 7 | 88745367 | 88837852 - | NM_001164087 | Homer2        | 10115 | 88827537 | 88827737 |
| 7 | 88745367 | 88851812 - | NM_011983    | Homer2        | 19016 | 88832596 | 88832796 |
| 7 | 88745367 | 88851812 - | NM_011983    | Homer2        | 18151 | 88833461 | 88833661 |
| 7 | 88745367 | 88851812 - | NM_011983    | Homer2        | 24075 | 88827537 | 88827737 |
| 7 | 88927073 | 88934340 - | NM_026077    | 3110040N11Rik | -7918 | 88942258 | 88942458 |
| 7 | 88936960 | 88974318 - | NM_146193    | Btbd1         | 3589  | 88970529 | 88970729 |
| 7 | 88936960 | 88974318 - | NM_146193    | Btbd1         | 803   | 88973315 | 88973515 |
| 7 | 88936960 | 88974318 - | NM_146193    | Btbd1         | 31860 | 88942258 | 88942458 |
| 7 | 89408418 | 89455931 + | NM_001277954 | Sh3gl3        | -5061 | 89403157 | 89403357 |
| 7 | 89408418 | 89455931 + | NM_001277955 | Sh3gl3        | -5061 | 89403157 | 89403357 |
| 7 | 89408418 | 89455931 + | NM_017400    | Sh3gl3        | -5061 | 89403157 | 89403357 |
| 7 | 89797124 | 89926363 + | NM_001159672 | Eftud1        | 84517 | 89881641 | 89881841 |

|   |          |            |              |         |        |          |          |
|---|----------|------------|--------------|---------|--------|----------|----------|
| 7 | 89797124 | 89926363 + | NM_001159672 | Eftud1  | 51735  | 89848859 | 89849059 |
| 7 | 89797124 | 89926363 + | NM_175317    | Eftud1  | 84517  | 89881641 | 89881841 |
| 7 | 89797124 | 89926363 + | NM_175317    | Eftud1  | 51735  | 89848859 | 89849059 |
| 7 | 90733441 | 90772220 + | NM_177695    | Tmc3    | 14115  | 90747556 | 90747756 |
| 7 | 90780527 | 90790839 + | NM_023377    | Stard5  | -4868  | 90775459 | 90775659 |
| 7 | 90791573 | 90884001 - | NM_010551    | Il16    | 39367  | 90844434 | 90844634 |
| 7 | 91081367 | 91235016 - | NM_030728    | Cemip   | 107001 | 91127815 | 91128015 |
| 7 | 91081367 | 91235016 - | NM_030728    | Cemip   | 60200  | 91174616 | 91174816 |
| 7 | 91081367 | 91235016 - | NM_030728    | Cemip   | 55328  | 91179488 | 91179688 |
| 7 | 91081367 | 91235016 - | NM_030728    | Cemip   | 58635  | 91176181 | 91176381 |
| 7 | 91081367 | 91235016 - | NM_030728    | Cemip   | 66849  | 91167967 | 91168167 |
| 7 | 91081367 | 91235016 - | NM_030728    | Cemip   | 63872  | 91170944 | 91171144 |
| 7 | 91081367 | 91235016 - | NM_030728    | Cemip   | 67467  | 91167349 | 91167549 |
| 7 | 91257866 | 91300404 - | NM_133722    | Abhd17c | 23972  | 91276232 | 91276432 |
| 7 | 91257866 | 91300404 - | NM_133722    | Abhd17c | 33654  | 91266550 | 91266750 |
| 7 | 91677464 | 91726850 + | NR_045098    | Gm2115  | -9926  | 91667338 | 91667538 |
| 7 | 95426603 | 95459386 + | NM_009982    | Ctsc    | 27781  | 95454384 | 95454584 |
| 7 | 95426603 | 95459386 + | NM_009982    | Ctsc    | 1275   | 95427878 | 95428078 |
| 7 | 95426603 | 95459386 + | NM_009982    | Ctsc    | 11819  | 95438422 | 95438622 |
| 7 | 96288231 | 96487298 - | NM_028343    | Tmem135 | 11774  | 96475324 | 96475524 |
| 7 | 96288231 | 96487298 - | NM_028343    | Tmem135 | 8595   | 96478503 | 96478703 |
| 7 | 96288231 | 96487298 - | NM_028343    | Tmem135 | 10782  | 96476316 | 96476516 |
| 7 | 96288231 | 96487298 - | NM_028343    | Tmem135 | 125309 | 96361789 | 96361989 |
| 7 | 96288231 | 96487298 - | NM_028343    | Tmem135 | 166734 | 96320364 | 96320564 |
| 7 | 96656295 | 96666097 - | NM_029614    | Prss23  | -1975  | 96668072 | 96668272 |
| 7 | 96656295 | 96666097 - | NM_029614    | Prss23  | -4664  | 96670761 | 96670961 |
| 7 | 96781328 | 97002870 + | NM_181407    | Me3     | -1583  | 96779545 | 96779745 |
| 7 | 96781328 | 97002870 + | NM_181407    | Me3     | 87434  | 96868762 | 96868962 |
| 7 | 96781328 | 97002870 + | NM_181407    | Me3     | 140521 | 96921849 | 96922049 |
| 7 | 96781328 | 97002870 + | NM_181407    | Me3     | 75624  | 96856952 | 96857152 |

|   |           |             |              |               |       |           |           |
|---|-----------|-------------|--------------|---------------|-------|-----------|-----------|
| 7 | 97177669  | 97197582 +  | NR_110364    | E230029C05Rik | -9307 | 97168162  | 97168362  |
| 7 | 97177669  | 97197582 +  | NR_110365    | E230029C05Rik | -9307 | 97168162  | 97168362  |
| 7 | 97273346  | 97277985 -  | NR_046006    | 2310010J17Rik | -1218 | 97279203  | 97279403  |
| 7 | 97273346  | 97277985 -  | NR_046006    | 2310010J17Rik | 0     | 97277803  | 97278003  |
| 7 | 97273346  | 97278447 -  | NR_046007    | 2310010J17Rik | -756  | 97279203  | 97279403  |
| 7 | 97273346  | 97278447 -  | NR_046007    | 2310010J17Rik | 444   | 97277803  | 97278003  |
| 7 | 97278742  | 97357958 +  | NM_001252520 | Picalm        | 461   | 97279203  | 97279403  |
| 7 | 97278742  | 97357958 +  | NM_001252520 | Picalm        | 18494 | 97297236  | 97297436  |
| 7 | 97278742  | 97357958 +  | NM_001252520 | Picalm        | -739  | 97277803  | 97278003  |
| 7 | 97278742  | 97357958 +  | NM_001252521 | Picalm        | 461   | 97279203  | 97279403  |
| 7 | 97278742  | 97357958 +  | NM_001252521 | Picalm        | 18494 | 97297236  | 97297436  |
| 7 | 97278742  | 97357958 +  | NM_001252521 | Picalm        | -739  | 97277803  | 97278003  |
| 7 | 97278742  | 97357958 +  | NM_001252522 | Picalm        | 461   | 97279203  | 97279403  |
| 7 | 97278742  | 97357958 +  | NM_001252522 | Picalm        | 18494 | 97297236  | 97297436  |
| 7 | 97278742  | 97357958 +  | NM_001252522 | Picalm        | -739  | 97277803  | 97278003  |
| 7 | 97278742  | 97357958 +  | NM_001252523 | Picalm        | 461   | 97279203  | 97279403  |
| 7 | 97278742  | 97357958 +  | NM_001252523 | Picalm        | 18494 | 97297236  | 97297436  |
| 7 | 97278742  | 97357958 +  | NM_001252523 | Picalm        | -739  | 97277803  | 97278003  |
| 7 | 97278742  | 97357958 +  | NM_001252524 | Picalm        | 461   | 97279203  | 97279403  |
| 7 | 97278742  | 97357958 +  | NM_001252524 | Picalm        | 18494 | 97297236  | 97297436  |
| 7 | 97278742  | 97357958 +  | NM_001252524 | Picalm        | -739  | 97277803  | 97278003  |
| 7 | 97278742  | 97357958 +  | NM_146194    | Picalm        | 461   | 97279203  | 97279403  |
| 7 | 97278742  | 97357958 +  | NM_146194    | Picalm        | 18494 | 97297236  | 97297436  |
| 7 | 97278742  | 97357958 +  | NM_146194    | Picalm        | -739  | 97277803  | 97278003  |
| 7 | 97617339  | 97624506 -  | NM_026734    | Tmem126b      | -2390 | 97626896  | 97627096  |
| 7 | 99890224  | 99985628 +  | NM_029494    | Rab30         | 70104 | 99960328  | 99960528  |
| 7 | 100006037 | 100022743 - | NM_001080995 | Ddias         | -705  | 100023448 | 100023648 |
| 7 | 100006037 | 100022743 - | NM_001080995 | Ddias         | -4583 | 100027326 | 100027526 |
| 7 | 100023763 | 100083092 + | NM_028243    | Prcp          | -115  | 100023448 | 100023648 |
| 7 | 100023763 | 100083092 + | NM_028243    | Prcp          | 3563  | 100027326 | 100027526 |



|   |           |             |              |         |        |           |           |
|---|-----------|-------------|--------------|---------|--------|-----------|-----------|
| 7 | 104100037 | 104213268 + | NM_153591    | Nars2   | 3033   | 104103070 | 104103270 |
| 7 | 104100037 | 104213268 + | NM_153591    | Nars2   | 61532  | 104161569 | 104161769 |
| 7 | 104230261 | 104457462 + | NM_001162477 | Gab2    | 127404 | 104357665 | 104357865 |
| 7 | 104230261 | 104457462 + | NM_010248    | Gab2    | 127404 | 104357665 | 104357865 |
| 7 | 104457890 | 104474475 - | NM_001177412 | Usp35   | 7428   | 104466847 | 104467047 |
| 7 | 104561467 | 104566021 - | NM_009381    | Thrsp   | 1633   | 104564188 | 104564388 |
| 7 | 104728406 | 104841293 + | NM_001081267 | Rsf1    | 57904  | 104786310 | 104786510 |
| 7 | 104728406 | 104841293 + | NM_001081267 | Rsf1    | 50680  | 104779086 | 104779286 |
| 7 | 104746859 | 104793623 - | NR_126461    | Rsf1os1 | 7113   | 104786310 | 104786510 |
| 7 | 104746859 | 104793623 - | NR_126461    | Rsf1os1 | 14337  | 104779086 | 104779286 |
| 7 | 104874889 | 104886758 - | NM_175105    | Aqp11   | 1030   | 104885528 | 104885728 |
| 7 | 104874889 | 104886758 - | NM_175105    | Aqp11   | -1864  | 104888622 | 104888822 |
| 7 | 104874889 | 104886758 - | NM_175105    | Aqp11   | 3226   | 104883332 | 104883532 |
| 7 | 104874889 | 104886758 - | NM_175105    | Aqp11   | 4360   | 104882198 | 104882398 |
| 7 | 104991449 | 105060892 + | NM_011035    | Pak1    | 2795   | 104994244 | 104994444 |
| 7 | 104991449 | 105060892 + | NM_011035    | Pak1    | 31074  | 105022523 | 105022723 |
| 7 | 104991449 | 105060892 + | NM_011035    | Pak1    | 27115  | 105018564 | 105018764 |
| 7 | 104991449 | 105060892 + | NM_011035    | Pak1    | -3447  | 104987802 | 104988002 |
| 7 | 105199564 | 105268004 - | NM_001256081 | Myo7a   | 14720  | 105253084 | 105253284 |
| 7 | 105199564 | 105268004 - | NM_001256081 | Myo7a   | 6585   | 105261219 | 105261419 |
| 7 | 105199564 | 105257759 - | NM_001256082 | Myo7a   | 4475   | 105253084 | 105253284 |
| 7 | 105199564 | 105257759 - | NM_001256082 | Myo7a   | -3460  | 105261219 | 105261419 |
| 7 | 105199564 | 105257759 - | NM_001256083 | Myo7a   | 4475   | 105253084 | 105253284 |
| 7 | 105199564 | 105257759 - | NM_001256083 | Myo7a   | -3460  | 105261219 | 105261419 |
| 7 | 105199570 | 105268004 - | NM_008663    | Myo7a   | 14720  | 105253084 | 105253284 |
| 7 | 105199570 | 105268004 - | NM_008663    | Myo7a   | 6585   | 105261219 | 105261419 |
| 7 | 105270069 | 105310853 - | NM_001301250 | Capn5   | -1469  | 105312322 | 105312522 |
| 7 | 105270069 | 105326785 - | NM_007602    | Capn5   | 14263  | 105312322 | 105312522 |
| 7 | 105340925 | 105347986 - | NM_001081167 | B3gnt6  | 3858   | 105343928 | 105344128 |
| 7 | 105588926 | 105625989 + | NM_001130693 | Gucy2d  | -6049  | 105582677 | 105582877 |

|   |           |             |              |         |       |           |           |
|---|-----------|-------------|--------------|---------|-------|-----------|-----------|
| 7 | 105851873 | 105866572 + | NM_028410    | Prkrir  | 7034  | 105858907 | 105859107 |
| 7 | 105983622 | 106003258 + | NM_001285792 | Wnt11   | 15419 | 105999041 | 105999241 |
| 7 | 105983622 | 106003258 + | NM_001285792 | Wnt11   | -2627 | 105980795 | 105980995 |
| 7 | 105983622 | 106003258 + | NM_001285794 | Wnt11   | 15419 | 105999041 | 105999241 |
| 7 | 105983622 | 106003258 + | NM_001285794 | Wnt11   | -2627 | 105980795 | 105980995 |
| 7 | 105987355 | 106003258 + | NM_001285795 | Wnt11   | 11686 | 105999041 | 105999241 |
| 7 | 105987355 | 106003258 + | NM_001285795 | Wnt11   | -6360 | 105980795 | 105980995 |
| 7 | 105987355 | 106003258 + | NM_009519    | Wnt11   | 11686 | 105999041 | 105999241 |
| 7 | 105987355 | 106003258 + | NM_009519    | Wnt11   | -6360 | 105980795 | 105980995 |
| 7 | 106302173 | 106331224 - | NM_026384    | Dgat2   | 2298  | 106328726 | 106328926 |
| 7 | 106302173 | 106331224 - | NM_026384    | Dgat2   | -2506 | 106333730 | 106333930 |
| 7 | 106302173 | 106331224 - | NM_026384    | Dgat2   | 20685 | 106310339 | 106310539 |
| 7 | 106302173 | 106331224 - | NM_026384    | Dgat2   | 21060 | 106309964 | 106310164 |
| 7 | 106367594 | 106387122 - | NM_177448    | Mogat2  | -107  | 106387229 | 106387429 |
| 7 | 106367594 | 106387122 - | NM_177448    | Mogat2  | 11625 | 106375297 | 106375497 |
| 7 | 106415957 | 106468863 + | NM_001048167 | Map6    | 49341 | 106465298 | 106465498 |
| 7 | 106415957 | 106468863 + | NM_001048167 | Map6    | 21872 | 106437829 | 106438029 |
| 7 | 106415957 | 106485648 + | NM_010837    | Map6    | 49341 | 106465298 | 106465498 |
| 7 | 106415957 | 106485648 + | NM_010837    | Map6    | 21872 | 106437829 | 106438029 |
| 7 | 106416856 | 106485648 + | NM_001043355 | Map6    | 48442 | 106465298 | 106465498 |
| 7 | 106416856 | 106485648 + | NM_001043355 | Map6    | 20973 | 106437829 | 106438029 |
| 7 | 106530059 | 106609495 + | NM_201352    | Gdpd5   | -5681 | 106524178 | 106524378 |
| 7 | 106530059 | 106609495 + | NM_201352    | Gdpd5   | 53642 | 106583701 | 106583901 |
| 7 | 106530059 | 106609495 + | NM_201352    | Gdpd5   | 15504 | 106545563 | 106545763 |
| 7 | 106683996 | 106755282 + | NM_177231    | Arrb1   | -2632 | 106681164 | 106681364 |
| 7 | 106683996 | 106755282 + | NM_178220    | Arrb1   | -2632 | 106681164 | 106681364 |
| 7 | 106806314 | 106855353 - | NM_001252530 | Slco2b1 | 13166 | 106841987 | 106842187 |
| 7 | 106806314 | 106855353 - | NM_001252530 | Slco2b1 | -8022 | 106863375 | 106863575 |
| 7 | 106806314 | 106855353 - | NM_001252530 | Slco2b1 | 5718  | 106849435 | 106849635 |
| 7 | 106806314 | 106855353 - | NM_001252530 | Slco2b1 | 35377 | 106819776 | 106819976 |

|   |           |             |              |          |        |           |           |
|---|-----------|-------------|--------------|----------|--------|-----------|-----------|
| 7 | 106806314 | 106855353 - | NM_001252530 | Slco2b1  | 41951  | 106813202 | 106813402 |
| 7 | 106806314 | 106844320 - | NM_001252531 | Slco2b1  | 2133   | 106841987 | 106842187 |
| 7 | 106806314 | 106844320 - | NM_001252531 | Slco2b1  | -5115  | 106849435 | 106849635 |
| 7 | 106806314 | 106844320 - | NM_001252531 | Slco2b1  | 24344  | 106819776 | 106819976 |
| 7 | 106806314 | 106844320 - | NM_001252531 | Slco2b1  | 30918  | 106813202 | 106813402 |
| 7 | 106806314 | 106859851 - | NM_175316    | Slco2b1  | 17664  | 106841987 | 106842187 |
| 7 | 106806314 | 106859851 - | NM_175316    | Slco2b1  | -3524  | 106863375 | 106863575 |
| 7 | 106806314 | 106859851 - | NM_175316    | Slco2b1  | 10216  | 106849435 | 106849635 |
| 7 | 106806314 | 106859851 - | NM_175316    | Slco2b1  | 39875  | 106819776 | 106819976 |
| 7 | 106806314 | 106859851 - | NM_175316    | Slco2b1  | 46449  | 106813202 | 106813402 |
| 7 | 106959949 | 106976928 - | NM_016720    | Neu3     | 2916   | 106973812 | 106974012 |
| 7 | 107068765 | 107128969 - | NM_175388    | Rnf169   | 44702  | 107084067 | 107084267 |
| 7 | 107230623 | 107270011 - | NM_133692    | Pold3    | -5346  | 107275357 | 107275557 |
| 7 | 107325180 | 107333380 + | NM_001190869 | Kcne3    | 4646   | 107329826 | 107330026 |
| 7 | 107327193 | 107333380 + | NM_001190870 | Kcne3    | 2633   | 107329826 | 107330026 |
| 7 | 107327193 | 107333380 + | NM_001190871 | Kcne3    | 2633   | 107329826 | 107330026 |
| 7 | 107327193 | 107333380 + | NM_001190950 | Kcne3    | 2633   | 107329826 | 107330026 |
| 7 | 107327193 | 107333380 + | NM_020574    | Kcne3    | 2633   | 107329826 | 107330026 |
| 7 | 107520743 | 107618669 + | NM_001017985 | C2cd3    | 29035  | 107549778 | 107549978 |
| 7 | 107520743 | 107618669 + | NM_001017985 | C2cd3    | 60746  | 107581489 | 107581689 |
| 7 | 107520743 | 107618669 + | NM_001017985 | C2cd3    | 58905  | 107579648 | 107579848 |
| 7 | 107520743 | 107618669 + | NM_001017985 | C2cd3    | 36795  | 107557538 | 107557738 |
| 7 | 107641867 | 107648139 + | NM_011671    | Ucp2     | -489   | 107641178 | 107641378 |
| 7 | 107697631 | 107731645 - | NM_198831    | Mrpl48   | 3517   | 107727928 | 107728128 |
| 7 | 107697631 | 107731645 - | NM_198831    | Mrpl48   | 27914  | 107703531 | 107703731 |
| 7 | 107697631 | 107756511 - | NR_003559    | Mrpl48   | 28383  | 107727928 | 107728128 |
| 7 | 107697631 | 107756511 - | NR_003559    | Mrpl48   | 52780  | 107703531 | 107703731 |
| 7 | 107855216 | 107990145 + | NM_178764    | Fam168a  | 91955  | 107947171 | 107947371 |
| 7 | 108018260 | 108080676 - | NM_001081116 | Arhgef17 | -670   | 108081346 | 108081546 |
| 7 | 108257289 | 108432920 + | NM_001146010 | Fchs2    | 155610 | 108412899 | 108413099 |

|   |           |             |              |         |        |           |           |
|---|-----------|-------------|--------------|---------|--------|-----------|-----------|
| 7 | 108257289 | 108432920 + | NM_199012    | Fchsd2  | 155610 | 108412899 | 108413099 |
| 7 | 108438130 | 108450603 - | NM_001111111 | Atg16l2 | -8744  | 108459347 | 108459547 |
| 7 | 109061503 | 109082372 - | NM_001162973 | Lrrc51  | -2063  | 109084435 | 109084635 |
| 7 | 109061503 | 109082372 - | NM_027053    | Lrrc51  | -2063  | 109084435 | 109084635 |
| 7 | 109118357 | 109163474 + | NM_133947    | Numa1   | 3821   | 109122178 | 109122378 |
| 7 | 109168386 | 109213647 - | NM_029211    | Rnf121  | 899    | 109212548 | 109212748 |
| 7 | 109168386 | 109213647 - | NM_029211    | Rnf121  | 5688   | 109207759 | 109207959 |
| 7 | 109168386 | 109213647 - | NM_029211    | Rnf121  | 2692   | 109210755 | 109210955 |
| 7 | 109214005 | 109232277 + | NM_001286689 | Xndc1   | -1257  | 109212548 | 109212748 |
| 7 | 109214005 | 109232277 + | NM_001286689 | Xndc1   | -6046  | 109207759 | 109207959 |
| 7 | 109214005 | 109232277 + | NM_001286689 | Xndc1   | -3050  | 109210755 | 109210955 |
| 7 | 109214005 | 109232277 + | NM_001286690 | Xndc1   | -1257  | 109212548 | 109212748 |
| 7 | 109214005 | 109232277 + | NM_001286690 | Xndc1   | -6046  | 109207759 | 109207959 |
| 7 | 109214005 | 109232277 + | NM_001286690 | Xndc1   | -3050  | 109210755 | 109210955 |
| 7 | 109214005 | 109245379 + | NR_104582    | Xntrpc  | -1257  | 109212548 | 109212748 |
| 7 | 109214005 | 109245379 + | NR_104582    | Xntrpc  | -6046  | 109207759 | 109207959 |
| 7 | 109214005 | 109245379 + | NR_104582    | Xntrpc  | -3050  | 109210755 | 109210955 |
| 7 | 109219733 | 109245379 + | NM_011644    | Xntrpc  | -6985  | 109212548 | 109212748 |
| 7 | 109219733 | 109245379 + | NM_011644    | Xntrpc  | -8778  | 109210755 | 109210955 |
| 7 | 109267914 | 109358681 - | NM_001287164 | Nup98   | 36311  | 109322170 | 109322370 |
| 7 | 109267914 | 109358681 - | NM_001287164 | Nup98   | 62780  | 109295701 | 109295901 |
| 7 | 109282700 | 109358681 - | NM_001287165 | Nup98   | 36311  | 109322170 | 109322370 |
| 7 | 109282700 | 109358681 - | NM_001287165 | Nup98   | 62780  | 109295701 | 109295901 |
| 7 | 109282700 | 109358681 - | NM_022979    | Nup98   | 36311  | 109322170 | 109322370 |
| 7 | 109282700 | 109358681 - | NM_022979    | Nup98   | 62780  | 109295701 | 109295901 |
| 7 | 109293060 | 109358681 - | NM_001287166 | Nup98   | 36311  | 109322170 | 109322370 |
| 7 | 109293060 | 109358681 - | NM_001287166 | Nup98   | 62780  | 109295701 | 109295901 |
| 7 | 109293060 | 109358382 - | NM_001287167 | Nup98   | 36012  | 109322170 | 109322370 |
| 7 | 109293060 | 109358382 - | NM_001287167 | Nup98   | 62481  | 109295701 | 109295901 |
| 7 | 109416338 | 109585370 + | NM_009287    | Stim1   | 8980   | 109425318 | 109425518 |

|   |           |             |              |          |       |           |           |
|---|-----------|-------------|--------------|----------|-------|-----------|-----------|
| 7 | 111487268 | 111501873 - | NM_001146007 | Trim12c  | 5041  | 111496632 | 111496832 |
| 7 | 111487268 | 111501873 - | NM_001146007 | Trim12c  | 7137  | 111494536 | 111494736 |
| 7 | 111487268 | 111501864 - | NM_175677    | Trim12c  | 5032  | 111496632 | 111496832 |
| 7 | 111487268 | 111501864 - | NM_175677    | Trim12c  | 7128  | 111494536 | 111494736 |
| 7 | 111736269 | 111737295 + | NM_146379    | Olfr654  | -4847 | 111731222 | 111731422 |
| 7 | 111744767 | 111745694 - | NM_146820    | Olfr655  | -2571 | 111748265 | 111748465 |
| 7 | 112519725 | 112548569 - | NM_001242363 | Fam160a2 | 4747  | 112543622 | 112543822 |
| 7 | 112519725 | 112548569 - | NM_001242363 | Fam160a2 | 3831  | 112544538 | 112544738 |
| 7 | 112519725 | 112548569 - | NM_001242363 | Fam160a2 | 26262 | 112522107 | 112522307 |
| 7 | 112519725 | 112548569 - | NM_001242364 | Fam160a2 | 4747  | 112543622 | 112543822 |
| 7 | 112519725 | 112548569 - | NM_001242364 | Fam160a2 | 3831  | 112544538 | 112544738 |
| 7 | 112519725 | 112548569 - | NM_001242364 | Fam160a2 | 26262 | 112522107 | 112522307 |
| 7 | 112519725 | 112548569 - | NM_001242365 | Fam160a2 | 4747  | 112543622 | 112543822 |
| 7 | 112519725 | 112548569 - | NM_001242365 | Fam160a2 | 3831  | 112544538 | 112544738 |
| 7 | 112519725 | 112548569 - | NM_001242365 | Fam160a2 | 26262 | 112522107 | 112522307 |
| 7 | 112519725 | 112548569 - | NM_199009    | Fam160a2 | 4747  | 112543622 | 112543822 |
| 7 | 112519725 | 112548569 - | NM_199009    | Fam160a2 | 3831  | 112544538 | 112544738 |
| 7 | 112519725 | 112548569 - | NM_199009    | Fam160a2 | 26262 | 112522107 | 112522307 |
| 7 | 112523612 | 112526802 + | NM_001195727 | Gm5901   | -1305 | 112522107 | 112522307 |
| 7 | 112553082 | 112557253 + | NM_001033317 | Cnga4    | -9260 | 112543622 | 112543822 |
| 7 | 112553082 | 112557253 + | NM_001033317 | Cnga4    | -8344 | 112544538 | 112544738 |
| 7 | 112891408 | 112892853 - | NM_020024    | Taf10    | -7405 | 112900258 | 112900458 |
| 7 | 112893361 | 112900722 - | NM_009906    | Tpp1     | 264   | 112900258 | 112900458 |
| 7 | 112952296 | 112959602 - | NM_025301    | Mrpl17   | -7517 | 112967119 | 112967319 |
| 7 | 114144389 | 114146120 - | NM_010983    | Olfr2    | -1670 | 114147790 | 114147990 |
| 7 | 114738565 | 114888411 + | NM_008905    | Ppfibp2  | 68649 | 114807214 | 114807414 |
| 7 | 114738565 | 114888411 + | NM_008905    | Ppfibp2  | 85710 | 114824275 | 114824475 |
| 7 | 114750358 | 114892098 + | NM_001163557 | Ppfibp2  | 56856 | 114807214 | 114807414 |
| 7 | 114750358 | 114892098 + | NM_001163557 | Ppfibp2  | 73917 | 114824275 | 114824475 |
| 7 | 114925058 | 114944694 - | NM_172908    | Ovch2    | 15808 | 114928686 | 114928886 |

|   |           |             |              |        |        |           |           |
|---|-----------|-------------|--------------|--------|--------|-----------|-----------|
| 7 | 116667425 | 116760662 - | NM_001001326 | St5    | 36126  | 116724336 | 116724536 |
| 7 | 116667425 | 116760662 - | NM_001001326 | St5    | 23135  | 116737327 | 116737527 |
| 7 | 116667425 | 116760662 - | NM_029811    | St5    | 36126  | 116724336 | 116724536 |
| 7 | 116667425 | 116760662 - | NM_029811    | St5    | 23135  | 116737327 | 116737527 |
| 7 | 116667425 | 116760083 - | NR_037617    | St5    | 35547  | 116724336 | 116724536 |
| 7 | 116667425 | 116760083 - | NR_037617    | St5    | 22556  | 116737327 | 116737527 |
| 7 | 116847251 | 116855696 + | NM_020616    | Akip1  | -201   | 116846850 | 116847050 |
| 7 | 116901570 | 116925060 - | NM_020610    | Nrip3  | 410    | 116924450 | 116924650 |
| 7 | 116942205 | 117009194 - | NM_020052    | Scube2 | 12721  | 116996273 | 116996473 |
| 7 | 117161939 | 117198629 + | NM_181517    | Ipo7   | 10521  | 117172460 | 117172660 |
| 7 | 117265573 | 117286814 + | NM_009516    | Wee1   | -396   | 117264977 | 117265177 |
| 7 | 117365217 | 117427021 + | NM_009302    | Swap70 | 44099  | 117409316 | 117409516 |
| 7 | 117451527 | 117758435 - | NM_177324    | Sbf2   | 236642 | 117521593 | 117521793 |
| 7 | 117451527 | 117758435 - | NM_177324    | Sbf2   | 2366   | 117755869 | 117756069 |
| 7 | 117451527 | 117758435 - | NM_177324    | Sbf2   | -4128  | 117762563 | 117762763 |
| 7 | 117451527 | 117758435 - | NM_177324    | Sbf2   | 50074  | 117708161 | 117708361 |
| 7 | 117451527 | 117758435 - | NM_177324    | Sbf2   | 182399 | 117575836 | 117576036 |
| 7 | 117771183 | 117773334 + | NM_009627    | Adm    | 322    | 117771505 | 117771705 |
| 7 | 117771183 | 117773334 + | NM_009627    | Adm    | -8420  | 117762563 | 117762763 |
| 7 | 117994121 | 118006468 - | NM_053247    | Lyve1  | 3822   | 118002446 | 118002646 |
| 7 | 117994121 | 118006468 - | NM_053247    | Lyve1  | 2416   | 118003852 | 118004052 |
| 7 | 118011772 | 118089702 - | NM_010826    | Mrvi1  | 51750  | 118037752 | 118037952 |
| 7 | 118011772 | 118089702 - | NM_010826    | Mrvi1  | 54218  | 118035284 | 118035484 |
| 7 | 118011772 | 118125976 - | NM_194464    | Mrvi1  | 88024  | 118037752 | 118037952 |
| 7 | 118011772 | 118125976 - | NM_194464    | Mrvi1  | 90492  | 118035284 | 118035484 |
| 7 | 119167020 | 119254901 + | NM_133758    | Usp47  | 1442   | 119168462 | 119168662 |
| 7 | 119167020 | 119254901 + | NM_133758    | Usp47  | 16926  | 119183946 | 119184146 |
| 7 | 119167020 | 119254901 + | NM_133758    | Usp47  | 2016   | 119169036 | 119169236 |
| 7 | 119167020 | 119254901 + | NM_177249    | Usp47  | 1442   | 119168462 | 119168662 |
| 7 | 119167020 | 119254901 + | NM_177249    | Usp47  | 16926  | 119183946 | 119184146 |

|   |           |             |              |               |        |           |           |
|---|-----------|-------------|--------------|---------------|--------|-----------|-----------|
| 7 | 119167020 | 119254901 + | NM_177249    | Usp47         | 2016   | 119169036 | 119169236 |
| 7 | 119369350 | 119497490 + | NM_001193305 | Mical2        | 50051  | 119419401 | 119419601 |
| 7 | 119369350 | 119497490 + | NM_001193305 | Mical2        | 75956  | 119445306 | 119445506 |
| 7 | 119369350 | 119497490 + | NM_001193305 | Mical2        | 83641  | 119452991 | 119453191 |
| 7 | 119369350 | 119497490 + | NM_001193305 | Mical2        | 70777  | 119440127 | 119440327 |
| 7 | 119369350 | 119497490 + | NM_001193305 | Mical2        | 50961  | 119420311 | 119420511 |
| 7 | 119369350 | 119497490 + | NM_001193305 | Mical2        | -8286  | 119360864 | 119361064 |
| 7 | 119369350 | 119497490 + | NM_001193305 | Mical2        | 32761  | 119402111 | 119402311 |
| 7 | 119369350 | 119497490 + | NM_001193305 | Mical2        | -6966  | 119362184 | 119362384 |
| 7 | 119369350 | 119498709 + | NM_177282    | Mical2        | 50051  | 119419401 | 119419601 |
| 7 | 119369350 | 119498709 + | NM_177282    | Mical2        | 75956  | 119445306 | 119445506 |
| 7 | 119369350 | 119498709 + | NM_177282    | Mical2        | 83641  | 119452991 | 119453191 |
| 7 | 119369350 | 119498709 + | NM_177282    | Mical2        | 70777  | 119440127 | 119440327 |
| 7 | 119369350 | 119498709 + | NM_177282    | Mical2        | 50961  | 119420311 | 119420511 |
| 7 | 119369350 | 119498709 + | NM_177282    | Mical2        | -8286  | 119360864 | 119361064 |
| 7 | 119369350 | 119498709 + | NM_177282    | Mical2        | 32761  | 119402111 | 119402311 |
| 7 | 119369350 | 119498709 + | NM_177282    | Mical2        | -6966  | 119362184 | 119362384 |
| 7 | 119822834 | 120050320 + | NM_001166584 | Tead1         | 147030 | 119969864 | 119970064 |
| 7 | 119822834 | 120050320 + | NM_001166584 | Tead1         | 26781  | 119849615 | 119849815 |
| 7 | 119822834 | 120050320 + | NM_009346    | Tead1         | 147030 | 119969864 | 119970064 |
| 7 | 119822834 | 120050320 + | NM_009346    | Tead1         | 26781  | 119849615 | 119849815 |
| 7 | 119902898 | 120050320 + | NM_001166585 | Tead1         | 66966  | 119969864 | 119970064 |
| 7 | 120243750 | 120285530 - | NR_045978    | 4930543E12Rik | -8429  | 120293959 | 120294159 |
| 7 | 120909512 | 121186890 + | NM_145584    | Spon1         | 31068  | 120940580 | 120940780 |
| 7 | 120909512 | 121186890 + | NM_145584    | Spon1         | 51312  | 120960824 | 120961024 |
| 7 | 121190296 | 121261296 - | NM_025846    | Rras2         | 5085   | 121256011 | 121256211 |
| 7 | 121458993 | 121558676 - | NR_029437    | 4933406I18Rik | 52965  | 121505511 | 121505711 |
| 7 | 121498154 | 121558676 - | NR_029438    | 4933406I18Rik | 52965  | 121505511 | 121505711 |
| 7 | 121889280 | 121993895 + | NM_173767    | Insc          | 94678  | 121983958 | 121984158 |
| 7 | 122614386 | 123182259 - | NM_001025559 | Sox6          | 6      | 123182053 | 123182253 |

|   |           |             |              |      |        |           |           |
|---|-----------|-------------|--------------|------|--------|-----------|-----------|
| 7 | 122614386 | 123182259 - | NM_001025559 | Sox6 | 207561 | 122974498 | 122974698 |
| 7 | 122614386 | 123182259 - | NM_001025559 | Sox6 | 45287  | 123136772 | 123136972 |
| 7 | 122614386 | 123182259 - | NM_001025559 | Sox6 | 143628 | 123038431 | 123038631 |
| 7 | 122614386 | 123182259 - | NM_001025559 | Sox6 | 354310 | 122827749 | 122827949 |
| 7 | 122614386 | 123182259 - | NM_001025559 | Sox6 | 253949 | 122928110 | 122928310 |
| 7 | 122614386 | 123182259 - | NM_001025559 | Sox6 | 492835 | 122689224 | 122689424 |
| 7 | 122614386 | 123174562 - | NM_001025560 | Sox6 | -7491  | 123182053 | 123182253 |
| 7 | 122614386 | 123174562 - | NM_001025560 | Sox6 | 199864 | 122974498 | 122974698 |
| 7 | 122614386 | 123174562 - | NM_001025560 | Sox6 | 37590  | 123136772 | 123136972 |
| 7 | 122614386 | 123174562 - | NM_001025560 | Sox6 | 135931 | 123038431 | 123038631 |
| 7 | 122614386 | 123174562 - | NM_001025560 | Sox6 | 346613 | 122827749 | 122827949 |
| 7 | 122614386 | 123174562 - | NM_001025560 | Sox6 | 246252 | 122928110 | 122928310 |
| 7 | 122614386 | 123174562 - | NM_001025560 | Sox6 | 485138 | 122689224 | 122689424 |
| 7 | 122614386 | 122989655 - | NM_001277326 | Sox6 | 14957  | 122974498 | 122974698 |
| 7 | 122614386 | 122989655 - | NM_001277326 | Sox6 | 161706 | 122827749 | 122827949 |
| 7 | 122614386 | 122989655 - | NM_001277326 | Sox6 | 61345  | 122928110 | 122928310 |
| 7 | 122614386 | 122989655 - | NM_001277326 | Sox6 | 300231 | 122689224 | 122689424 |
| 7 | 122614386 | 122968225 - | NM_001277327 | Sox6 | -6273  | 122974498 | 122974698 |
| 7 | 122614386 | 122968225 - | NM_001277327 | Sox6 | 140276 | 122827749 | 122827949 |
| 7 | 122614386 | 122968225 - | NM_001277327 | Sox6 | 39915  | 122928110 | 122928310 |
| 7 | 122614386 | 122968225 - | NM_001277327 | Sox6 | 278801 | 122689224 | 122689424 |
| 7 | 122614386 | 122945124 - | NM_001277328 | Sox6 | 117175 | 122827749 | 122827949 |
| 7 | 122614386 | 122945124 - | NM_001277328 | Sox6 | 16814  | 122928110 | 122928310 |
| 7 | 122614386 | 122945124 - | NM_001277328 | Sox6 | 255700 | 122689224 | 122689424 |
| 7 | 122614386 | 123138601 - | NM_011445    | Sox6 | 163903 | 122974498 | 122974698 |
| 7 | 122614386 | 123138601 - | NM_011445    | Sox6 | 1629   | 123136772 | 123136972 |
| 7 | 122614386 | 123138601 - | NM_011445    | Sox6 | 99970  | 123038431 | 123038631 |
| 7 | 122614386 | 123138601 - | NM_011445    | Sox6 | 310652 | 122827749 | 122827949 |
| 7 | 122614386 | 123138601 - | NM_011445    | Sox6 | 210291 | 122928110 | 122928310 |
| 7 | 122614386 | 123138601 - | NM_011445    | Sox6 | 449177 | 122689224 | 122689424 |



|   |           |             |              |          |        |           |           |
|---|-----------|-------------|--------------|----------|--------|-----------|-----------|
| 7 | 123266999 | 123451891 - | NM_001305185 | Plekha7  | 104882 | 123346809 | 123347009 |
| 7 | 123266999 | 123451891 - | NM_001305185 | Plekha7  | -85    | 123451976 | 123452176 |
| 7 | 123266999 | 123451891 - | NM_001305185 | Plekha7  | 46808  | 123404883 | 123405083 |
| 7 | 123266999 | 123451891 - | NM_001305185 | Plekha7  | 110812 | 123340879 | 123341079 |
| 7 | 123266999 | 123451891 - | NM_001305185 | Plekha7  | 175973 | 123275718 | 123275918 |
| 7 | 123266999 | 123381291 - | NM_001305186 | Plekha7  | 34282  | 123346809 | 123347009 |
| 7 | 123266999 | 123381291 - | NM_001305186 | Plekha7  | 40212  | 123340879 | 123341079 |
| 7 | 123266999 | 123381291 - | NM_001305186 | Plekha7  | 105373 | 123275718 | 123275918 |
| 7 | 123266999 | 123333356 - | NM_172743    | Plekha7  | -7523  | 123340879 | 123341079 |
| 7 | 123266999 | 123333356 - | NM_172743    | Plekha7  | 57438  | 123275718 | 123275918 |
| 7 | 123277305 | 123342076 - | NM_001305189 | Plekha7  | -4733  | 123346809 | 123347009 |
| 7 | 123277305 | 123342076 - | NM_001305189 | Plekha7  | 997    | 123340879 | 123341079 |
| 7 | 124524493 | 124811145 + | NM_175645    | Xylt1    | 94259  | 124618752 | 124618952 |
| 7 | 124524493 | 124811145 + | NM_175645    | Xylt1    | 13131  | 124537624 | 124537824 |
| 7 | 124524493 | 124811145 + | NM_175645    | Xylt1    | 25456  | 124549949 | 124550149 |
| 7 | 124524493 | 124811145 + | NM_175645    | Xylt1    | 7730   | 124532223 | 124532423 |
| 7 | 125262404 | 125273140 - | NM_019419    | Arl6ip1  | 283    | 125272657 | 125272857 |
| 7 | 125274826 | 125387152 - | NM_001031814 | Smg1     | 27059  | 125359893 | 125360093 |
| 7 | 125628626 | 125635490 - | NM_001033380 | Itpripl2 | -723   | 125636213 | 125636413 |
| 7 | 125628626 | 125635490 - | NM_001033380 | Itpripl2 | -7535  | 125643025 | 125643225 |
| 7 | 125679358 | 125728201 - | NM_172476    | Tmc7     | 10309  | 125717692 | 125717892 |
| 7 | 125679358 | 125728201 - | NM_172476    | Tmc7     | 23992  | 125704009 | 125704209 |
| 7 | 125679358 | 125728201 - | NM_172476    | Tmc7     | 12309  | 125715692 | 125715892 |
| 7 | 125740811 | 125818600 + | NM_001105252 | Tmc5     | 4647   | 125745458 | 125745658 |
| 7 | 125832072 | 125849253 - | NM_019580    | Gde1     | 464    | 125848589 | 125848789 |
| 7 | 125832072 | 125849253 - | NM_019580    | Gde1     | 839    | 125848214 | 125848414 |
| 7 | 125856125 | 125880533 + | NM_182995    | Ccp110   | -7336  | 125848589 | 125848789 |
| 7 | 125856125 | 125880533 + | NM_182995    | Ccp110   | -7711  | 125848214 | 125848414 |
| 7 | 125985732 | 125999513 - | NM_001168218 | Knop1    | 10509  | 125988804 | 125989004 |
| 7 | 125985732 | 125999513 - | NM_001168219 | Knop1    | 10509  | 125988804 | 125989004 |

|   |           |             |              |         |       |           |           |
|---|-----------|-------------|--------------|---------|-------|-----------|-----------|
| 7 | 125985732 | 125999128 - | NM_001168220 | Knop1   | 10124 | 125988804 | 125989004 |
| 7 | 125985732 | 125999513 - | NM_023197    | Knop1   | 10509 | 125988804 | 125989004 |
| 7 | 126630101 | 126666997 - | NM_027943    | Pdilt   | -3763 | 126670760 | 126670960 |
| 7 | 126630101 | 126666997 - | NM_027943    | Pdilt   | 651   | 126666146 | 126666346 |
| 7 | 126669779 | 126686875 + | NM_178758    | Acsm5   | 981   | 126670760 | 126670960 |
| 7 | 126669779 | 126686875 + | NM_178758    | Acsm5   | -3433 | 126666146 | 126666346 |
| 7 | 126697854 | 126744209 + | NM_001177977 | Acsm2   | 4156  | 126702010 | 126702210 |
| 7 | 126705222 | 126744209 + | NM_001177978 | Acsm2   | -3012 | 126702010 | 126702210 |
| 7 | 126705222 | 126744209 + | NM_146197    | Acsm2   | -3012 | 126702010 | 126702210 |
| 7 | 126904437 | 126928411 + | NM_016870    | Acsm3   | 8983  | 126913420 | 126913620 |
| 7 | 126904437 | 126928411 + | NM_016870    | Acsm3   | -20   | 126904217 | 126904417 |
| 7 | 126904437 | 126928404 + | NM_212441    | Acsm3   | 8983  | 126913420 | 126913620 |
| 7 | 126904437 | 126928404 + | NM_212441    | Acsm3   | -20   | 126904217 | 126904417 |
| 7 | 126904437 | 126928406 + | NM_212442    | Acsm3   | 8983  | 126913420 | 126913620 |
| 7 | 126904437 | 126928406 + | NM_212442    | Acsm3   | -20   | 126904217 | 126904417 |
| 7 | 126996677 | 127039260 - | NM_001163703 | Dcun1d3 | 30955 | 127008105 | 127008305 |
| 7 | 126996677 | 127039260 - | NM_001163703 | Dcun1d3 | 14035 | 127025025 | 127025225 |
| 7 | 126996677 | 127039260 - | NM_001163703 | Dcun1d3 | 34844 | 127004216 | 127004416 |
| 7 | 126996677 | 127038973 - | NM_173408    | Dcun1d3 | 30668 | 127008105 | 127008305 |
| 7 | 126996677 | 127038973 - | NM_173408    | Dcun1d3 | 13748 | 127025025 | 127025225 |
| 7 | 126996677 | 127038973 - | NM_173408    | Dcun1d3 | 34557 | 127004216 | 127004416 |
| 7 | 127245940 | 127264501 + | NM_145586    | Tmem159 | 15105 | 127261045 | 127261245 |
| 7 | 127329898 | 127345503 - | NM_016669    | Crym    | 12320 | 127332983 | 127333183 |
| 7 | 127472198 | 127551202 + | NM_177213    | Abca15  | 47522 | 127519720 | 127519920 |
| 7 | 127986345 | 128050734 + | NM_007908    | Eef2k   | 37187 | 128023532 | 128023732 |
| 7 | 127986345 | 128050734 + | NM_007908    | Eef2k   | 32460 | 128018805 | 128019005 |
| 7 | 127987114 | 128050734 + | NM_001267710 | Eef2k   | 36418 | 128023532 | 128023732 |
| 7 | 127987114 | 128050734 + | NM_001267710 | Eef2k   | 31691 | 128018805 | 128019005 |
| 7 | 127994703 | 128050734 + | NM_001267711 | Eef2k   | 28829 | 128023532 | 128023732 |
| 7 | 127994703 | 128050734 + | NM_001267711 | Eef2k   | 24102 | 128018805 | 128019005 |

|   |           |             |              |               |       |           |           |
|---|-----------|-------------|--------------|---------------|-------|-----------|-----------|
| 7 | 128061258 | 128090947 + | NM_001164096 | Polr3e        | 840   | 128062098 | 128062298 |
| 7 | 128061258 | 128090947 + | NM_025298    | Polr3e        | 840   | 128062098 | 128062298 |
| 7 | 128100550 | 128125827 - | NM_007672    | Cdr2          | 21494 | 128104133 | 128104333 |
| 7 | 128100550 | 128125827 - | NM_007672    | Cdr2          | -717  | 128126544 | 128126744 |
| 7 | 128100550 | 128125827 - | NM_007672    | Cdr2          | 2118  | 128123509 | 128123709 |
| 7 | 128100550 | 128125827 - | NM_007672    | Cdr2          | 23123 | 128102504 | 128102704 |
| 7 | 128126023 | 128158302 + | NM_028955    | 4933427G17Rik | 26637 | 128152660 | 128152860 |
| 7 | 128126023 | 128158302 + | NM_028955    | 4933427G17Rik | 521   | 128126544 | 128126744 |
| 7 | 128126023 | 128158302 + | NM_028955    | 4933427G17Rik | 20108 | 128146131 | 128146331 |
| 7 | 128126023 | 128158302 + | NM_028955    | 4933427G17Rik | -2314 | 128123509 | 128123709 |
| 7 | 129008552 | 129062243 + | NM_001272023 | Scnn1b        | 37960 | 129046512 | 129046712 |
| 7 | 129008552 | 129062243 + | NM_011325    | Scnn1b        | 37960 | 129046512 | 129046712 |
| 7 | 129008552 | 129062243 + | NR_073548    | Scnn1b        | 37960 | 129046512 | 129046712 |
| 7 | 129066353 | 129125208 - | NM_001033318 | Cog7          | 41707 | 129083301 | 129083501 |
| 7 | 129177676 | 129210601 - | NM_026140    | Ears2         | -7366 | 129217967 | 129218167 |
| 7 | 129177676 | 129210601 - | NM_026140    | Ears2         | 20026 | 129190375 | 129190575 |
| 7 | 129210712 | 129225714 + | NM_138589    | Ubfd1         | 7255  | 129217967 | 129218167 |
| 7 | 129231558 | 129245363 - | NM_028177    | Ndufab1       | 6581  | 129238582 | 129238782 |
| 7 | 129250776 | 129276461 - | NM_001081238 | Palb2         | 827   | 129275434 | 129275634 |
| 7 | 129250776 | 129276461 - | NM_001289844 | Palb2         | 827   | 129275434 | 129275634 |
| 7 | 129250776 | 129276461 - | NM_001289845 | Palb2         | 827   | 129275434 | 129275634 |
| 7 | 129255086 | 129276461 - | NM_001289842 | Palb2         | 827   | 129275434 | 129275634 |
| 7 | 129255086 | 129276461 - | NM_001289843 | Palb2         | 827   | 129275434 | 129275634 |
| 7 | 129276555 | 129292559 + | NM_021608    | Dctn5         | -921  | 129275434 | 129275634 |
| 7 | 129302951 | 129313390 + | NM_011121    | Plk1          | -6693 | 129296058 | 129296258 |
| 7 | 129363010 | 129366054 + | NM_027363    | Chp2          | 1944  | 129364954 | 129365154 |
| 7 | 129363010 | 129366054 + | NM_027363    | Chp2          | -9603 | 129353207 | 129353407 |
| 7 | 129363010 | 129366054 + | NM_027363    | Chp2          | 1065  | 129364075 | 129364275 |
| 7 | 130112572 | 130113974 - | NR_045614    | 4930413G21Rik | -526  | 130114500 | 130114700 |
| 7 | 130114078 | 130146087 + | NM_011247    | Rbbp6         | 422   | 130114500 | 130114700 |

|   |           |             |              |          |       |           |           |
|---|-----------|-------------|--------------|----------|-------|-----------|-----------|
| 7 | 130114078 | 130123698 + | NM_175023    | Rbbp6    | 422   | 130114500 | 130114700 |
| 7 | 130267399 | 130338811 + | NM_144925    | Tnrc6a   | 14218 | 130281617 | 130281817 |
| 7 | 130358380 | 130416766 + | NM_146198    | Slc5a11  | 10115 | 130368495 | 130368695 |
| 7 | 130358380 | 130416766 + | NM_146198    | Slc5a11  | 31825 | 130390205 | 130390405 |
| 7 | 130358380 | 130416766 + | NM_146198    | Slc5a11  | 33335 | 130391715 | 130391915 |
| 7 | 130358380 | 130416766 + | NM_146198    | Slc5a11  | 30031 | 130388411 | 130388611 |
| 7 | 130358380 | 130416766 + | NM_146198    | Slc5a11  | 592   | 130358972 | 130359172 |
| 7 | 130358380 | 130416766 + | NM_146198    | Slc5a11  | -4733 | 130353447 | 130353647 |
| 7 | 130422663 | 130513430 - | NM_001122640 | Arhgap17 | -8080 | 130521510 | 130521710 |
| 7 | 130422663 | 130513430 - | NM_001122640 | Arhgap17 | 25310 | 130487920 | 130488120 |
| 7 | 130422663 | 130513430 - | NM_001122640 | Arhgap17 | 9657  | 130503573 | 130503773 |
| 7 | 130422663 | 130513430 - | NM_001122640 | Arhgap17 | 15717 | 130497513 | 130497713 |
| 7 | 130422663 | 130513430 - | NM_001122641 | Arhgap17 | -8080 | 130521510 | 130521710 |
| 7 | 130422663 | 130513430 - | NM_001122641 | Arhgap17 | 25310 | 130487920 | 130488120 |
| 7 | 130422663 | 130513430 - | NM_001122641 | Arhgap17 | 9657  | 130503573 | 130503773 |
| 7 | 130422663 | 130513430 - | NM_001122641 | Arhgap17 | 15717 | 130497513 | 130497713 |
| 7 | 130422663 | 130513430 - | NM_001122642 | Arhgap17 | -8080 | 130521510 | 130521710 |
| 7 | 130422663 | 130513430 - | NM_001122642 | Arhgap17 | 25310 | 130487920 | 130488120 |
| 7 | 130422663 | 130513430 - | NM_001122642 | Arhgap17 | 9657  | 130503573 | 130503773 |
| 7 | 130422663 | 130513430 - | NM_001122642 | Arhgap17 | 15717 | 130497513 | 130497713 |
| 7 | 130422663 | 130513430 - | NM_001122643 | Arhgap17 | -8080 | 130521510 | 130521710 |
| 7 | 130422663 | 130513430 - | NM_001122643 | Arhgap17 | 25310 | 130487920 | 130488120 |
| 7 | 130422663 | 130513430 - | NM_001122643 | Arhgap17 | 9657  | 130503573 | 130503773 |
| 7 | 130422663 | 130513430 - | NM_001122643 | Arhgap17 | 15717 | 130497513 | 130497713 |
| 7 | 130422663 | 130513430 - | NM_144529    | Arhgap17 | -8080 | 130521510 | 130521710 |
| 7 | 130422663 | 130513430 - | NM_144529    | Arhgap17 | 25310 | 130487920 | 130488120 |
| 7 | 130422663 | 130513430 - | NM_144529    | Arhgap17 | 9657  | 130503573 | 130503773 |
| 7 | 130422663 | 130513430 - | NM_144529    | Arhgap17 | 15717 | 130497513 | 130497713 |
| 7 | 130521496 | 130573873 + | NM_025304    | Lcmt1    | 14    | 130521510 | 130521710 |
| 7 | 130605808 | 130611518 + | NM_001109045 | Aqp8     | 0     | 130605668 | 130605868 |

|   |           |             |              |               |        |           |           |
|---|-----------|-------------|--------------|---------------|--------|-----------|-----------|
| 7 | 130605808 | 130611518 + | NM_001109045 | Aqp8          | -5026  | 130600582 | 130600782 |
| 7 | 130605808 | 130611518 + | NM_007474    | Aqp8          | 0      | 130605668 | 130605868 |
| 7 | 130605808 | 130611518 + | NM_007474    | Aqp8          | -5026  | 130600582 | 130600782 |
| 7 | 132611154 | 132635057 - | NM_026330    | Nsmce1        | 18998  | 132615859 | 132616059 |
| 7 | 132611154 | 132635057 - | NM_026330    | Nsmce1        | 652    | 132634205 | 132634405 |
| 7 | 132611154 | 132635057 - | NM_026330    | Nsmce1        | -1178  | 132636235 | 132636435 |
| 7 | 132611154 | 132635057 - | NM_026330    | Nsmce1        | 4301   | 132630556 | 132630756 |
| 7 | 132695796 | 132722989 + | NM_001008700 | Il4ra         | 9055   | 132704851 | 132705051 |
| 7 | 132784468 | 132851203 - | NM_207239    | Gtf3c1        | 2539   | 132848464 | 132848664 |
| 7 | 132851390 | 133018312 + | NM_001081022 | D430042O09Rik | 139801 | 132991191 | 132991391 |
| 7 | 132851390 | 133018312 + | NM_001081022 | D430042O09Rik | -2726  | 132848464 | 132848664 |
| 7 | 133245229 | 133344014 - | NM_001311143 | Xpo6          | 16185  | 133327629 | 133327829 |
| 7 | 133245229 | 133344014 - | NM_001311143 | Xpo6          | 3657   | 133340157 | 133340357 |
| 7 | 133245229 | 133344014 - | NM_001311143 | Xpo6          | 17798  | 133326016 | 133326216 |
| 7 | 133245229 | 133344014 - | NM_001311143 | Xpo6          | 73705  | 133270109 | 133270309 |
| 7 | 133245233 | 133343923 - | NM_028816    | Xpo6          | 16094  | 133327629 | 133327829 |
| 7 | 133245233 | 133343923 - | NM_028816    | Xpo6          | 3566   | 133340157 | 133340357 |
| 7 | 133245233 | 133343923 - | NM_028816    | Xpo6          | 17707  | 133326016 | 133326216 |
| 7 | 133245233 | 133343923 - | NM_028816    | Xpo6          | 73614  | 133270109 | 133270309 |
| 7 | 133416133 | 133438514 + | NM_145587    | Sbk1          | 12331  | 133428464 | 133428664 |
| 7 | 133526368 | 133540252 - | NM_010900    | Nfatc2ip      | -46    | 133540298 | 133540498 |
| 7 | 133690425 | 133709881 - | NM_146200    | Eif3c         | -74    | 133709955 | 133710155 |
| 7 | 133792823 | 133816294 + | NM_029339    | Ccdc101       | 1620   | 133794443 | 133794643 |
| 7 | 133903140 | 133909331 + | NM_011952    | Mapk3         | 641    | 133903781 | 133903981 |
| 7 | 133909928 | 133919160 + | NM_024228    | Gdpd3         | -5947  | 133903781 | 133903981 |
| 7 | 133920489 | 133924029 + | NM_025347    | Ypel3         | 3263   | 133923752 | 133923952 |
| 7 | 133920489 | 133924029 + | NM_026875    | Ypel3         | 3263   | 133923752 | 133923952 |
| 7 | 133924997 | 133929063 + | NM_011538    | Tbx6          | -1045  | 133923752 | 133923952 |
| 7 | 133929382 | 133935986 - | NM_019674    | Ppp4c         | -5952  | 133941938 | 133942138 |
| 7 | 133929382 | 133935986 - | NM_019674    | Ppp4c         | -5029  | 133941015 | 133941215 |

|   |           |             |              |               |       |           |           |
|---|-----------|-------------|--------------|---------------|-------|-----------|-----------|
| 7 | 133938748 | 133942693 - | NM_001177307 | Aldoa         | 555   | 133941938 | 133942138 |
| 7 | 133938748 | 133942693 - | NM_001177307 | Aldoa         | 1478  | 133941015 | 133941215 |
| 7 | 133938748 | 133943962 - | NM_001177308 | Aldoa         | 1824  | 133941938 | 133942138 |
| 7 | 133938748 | 133943962 - | NM_001177308 | Aldoa         | 2747  | 133941015 | 133941215 |
| 7 | 133938748 | 133942769 - | NM_007438    | Aldoa         | 631   | 133941938 | 133942138 |
| 7 | 133938748 | 133942769 - | NM_007438    | Aldoa         | 1554  | 133941015 | 133941215 |
| 7 | 133995947 | 134004978 - | NM_153580    | Ino80e        | -646  | 134005624 | 134005824 |
| 7 | 134005486 | 134008637 + | NM_172746    | Hirip3        | 138   | 134005624 | 134005824 |
| 7 | 134119428 | 134124016 + | NM_026638    | Cdipt         | 1247  | 134120675 | 134120875 |
| 7 | 134119428 | 134124016 + | NM_026638    | Cdipt         | 135   | 134119563 | 134119763 |
| 7 | 134340974 | 134351983 - | NM_144522    | Tbc1d10b      | -723  | 134352706 | 134352906 |
| 7 | 134355122 | 134357802 + | NM_016754    | Mylpf         | -2216 | 134352706 | 134352906 |
| 7 | 134375932 | 134376645 - | NR_030674    | Gm4532        | 200   | 134376245 | 134376445 |
| 7 | 134376957 | 134381375 + | NM_146201    | Zfp553        | -512  | 134376245 | 134376445 |
| 7 | 134400476 | 134404182 - | NM_023203    | Dctpp1        | 295   | 134403687 | 134403887 |
| 7 | 134486309 | 134488829 - | NM_146202    | Zfp768        | -1610 | 134490439 | 134490639 |
| 7 | 134516051 | 134519565 - | NM_175560    | Zfp747        | -2375 | 134521940 | 134522140 |
| 7 | 134516051 | 134519565 - | NM_175560    | Zfp747        | -3481 | 134523046 | 134523246 |
| 7 | 134516051 | 134519565 - | NM_175560    | Zfp747        | -2066 | 134521631 | 134521831 |
| 7 | 134534350 | 134537136 - | NM_198011    | E430018J23Rik | -6849 | 134543985 | 134544185 |
| 7 | 134534350 | 134537136 - | NM_198011    | E430018J23Rik | -4054 | 134541190 | 134541390 |
| 7 | 134542430 | 134542515 + | NR_030454.1  | Mir684-1      | 1555  | 134543985 | 134544185 |
| 7 | 134542430 | 134542515 + | NR_030454.1  | Mir684-1      | -1040 | 134541190 | 134541390 |
| 7 | 134562480 | 134565549 - | NM_026999    | Zfp688        | -4407 | 134569956 | 134570156 |
| 7 | 134653952 | 134656384 - | NR_024331    | 1700008J07Rik | -3554 | 134659938 | 134660138 |
| 7 | 134655497 | 134704734 + | NM_001304266 | Srcap         | 4441  | 134659938 | 134660138 |
| 7 | 135056031 | 135069277 + | NM_026370    | Kat8          | 6785  | 135062816 | 135063016 |
| 7 | 135206154 | 135262006 + | NM_001082960 | Itgam         | 34844 | 135240998 | 135241198 |
| 7 | 135206154 | 135262006 + | NM_008401    | Itgam         | 34844 | 135240998 | 135241198 |
| 7 | 135414893 | 135441646 - | NM_145590    | BC017158      | 8832  | 135432614 | 135432814 |

|   |           |             |              |          |       |           |           |
|---|-----------|-------------|--------------|----------|-------|-----------|-----------|
| 7 | 135431883 | 135431950 - | NR_037290    | Mir3103  | -664  | 135432614 | 135432814 |
| 7 | 135667097 | 135690494 + | NM_013863    | Bag3     | 19606 | 135686703 | 135686903 |
| 7 | 135667097 | 135690494 + | NM_013863    | Bag3     | 19118 | 135686215 | 135686415 |
| 7 | 135667097 | 135690494 + | NM_013863    | Bag3     | 11774 | 135678871 | 135679071 |
| 7 | 135754879 | 135839951 + | NM_178641    | Inpp5f   | 61028 | 135815907 | 135816107 |
| 7 | 135839973 | 135883944 - | NM_145955    | Mcmbp    | -8491 | 135892435 | 135892635 |
| 7 | 135839973 | 135883944 - | NM_145955    | Mcmbp    | 3776  | 135879968 | 135880168 |
| 7 | 135888384 | 135928350 + | NM_001029982 | Sec23ip  | 4051  | 135892435 | 135892635 |
| 7 | 135888384 | 135928350 + | NM_001029982 | Sec23ip  | -8216 | 135879968 | 135880168 |
| 7 | 136400608 | 136534822 + | NM_001080963 | Ppapdc1a | 28211 | 136428819 | 136429019 |
| 7 | 137676040 | 137690896 - | NM_001162855 | Nsmce4a  | 1085  | 137689611 | 137689811 |
| 7 | 137720998 | 137908297 + | NM_001004468 | Tacc2    | -2827 | 137717971 | 137718171 |
| 7 | 137720998 | 137908297 + | NM_001004468 | Tacc2    | -7964 | 137712834 | 137713034 |
| 7 | 137720998 | 137908299 + | NM_206856    | Tacc2    | -2827 | 137717971 | 137718171 |
| 7 | 137720998 | 137908299 + | NM_206856    | Tacc2    | -7964 | 137712834 | 137713034 |
| 7 | 138175590 | 138265143 + | NM_007769    | Dmbt1    | 5088  | 138180678 | 138180878 |
| 7 | 138175590 | 138265143 + | NM_007769    | Dmbt1    | -4191 | 138171199 | 138171399 |
| 7 | 139158143 | 139177317 + | NM_173410    | Gpr26    | 7623  | 139165766 | 139165966 |
| 7 | 139749158 | 139768082 - | NM_016978    | Oat      | -6043 | 139774125 | 139774325 |
| 7 | 139749158 | 139768082 - | NM_016978    | Oat      | -9360 | 139777442 | 139777642 |
| 7 | 139749158 | 139768082 - | NM_016978    | Oat      | 16704 | 139751178 | 139751378 |
| 7 | 139749158 | 139768082 - | NM_016978    | Oat      | -4157 | 139772239 | 139772439 |
| 7 | 139749158 | 139768082 - | NM_016978    | Oat      | 6070  | 139761812 | 139762012 |
| 7 | 139787922 | 139791321 - | NM_009123    | Nkx1-2   | -8765 | 139800086 | 139800286 |
| 7 | 139802326 | 139898103 + | NM_029609    | Lhpp     | 34278 | 139836604 | 139836804 |
| 7 | 139802326 | 139898103 + | NM_029609    | Lhpp     | 46070 | 139848396 | 139848596 |
| 7 | 139802326 | 139898103 + | NM_029609    | Lhpp     | -2040 | 139800086 | 139800286 |
| 7 | 139903767 | 139978619 - | NM_175268    | Fam53b   | 20325 | 139958094 | 139958294 |
| 7 | 139903767 | 139978619 - | NM_175268    | Fam53b   | 8068  | 139970351 | 139970551 |
| 7 | 139903767 | 139978619 - | NM_175268    | Fam53b   | 20855 | 139957564 | 139957764 |

|   |           |             |              |               |        |           |           |
|---|-----------|-------------|--------------|---------------|--------|-----------|-----------|
| 7 | 139903767 | 140004880 - | NM_212473    | Fam53b        | 46586  | 139958094 | 139958294 |
| 7 | 139903767 | 140004880 - | NM_212473    | Fam53b        | 1657   | 140003023 | 140003223 |
| 7 | 139903767 | 140004880 - | NM_212473    | Fam53b        | 34329  | 139970351 | 139970551 |
| 7 | 139903767 | 140004880 - | NM_212473    | Fam53b        | 47116  | 139957564 | 139957764 |
| 7 | 140019144 | 140044331 - | NM_028095    | Mettl10       | -6977  | 140051308 | 140051508 |
| 7 | 140050908 | 140076798 + | NM_198017    | Fam175b       | 400    | 140051308 | 140051508 |
| 7 | 140178694 | 140206931 - | NM_001170744 | Ctbp2         | -8338  | 140215269 | 140215469 |
| 7 | 140178694 | 140315167 - | NM_009980    | Ctbp2         | 99698  | 140215269 | 140215469 |
| 7 | 140178694 | 140315167 - | NM_009980    | Ctbp2         | 44692  | 140270275 | 140270475 |
| 7 | 140178694 | 140315167 - | NM_009980    | Ctbp2         | 94201  | 140220766 | 140220966 |
| 7 | 140778707 | 140793799 - | NM_028654    | Tex36         | -2539  | 140796338 | 140796538 |
| 7 | 141862370 | 142365331 + | NM_001033420 | Dock1         | 389029 | 142251399 | 142251599 |
| 7 | 141862370 | 142365331 + | NM_001033420 | Dock1         | 15586  | 141877956 | 141878156 |
| 7 | 141862370 | 142365331 + | NM_001033420 | Dock1         | 227226 | 142089596 | 142089796 |
| 7 | 141862370 | 142365331 + | NM_001033420 | Dock1         | 16714  | 141879084 | 141879284 |
| 7 | 141862370 | 142365331 + | NM_001033420 | Dock1         | -7426  | 141854744 | 141854944 |
| 7 | 142073591 | 142130114 - | NM_001143802 | Fam196a       | 40318  | 142089596 | 142089796 |
| 7 | 142460302 | 142464626 + | NM_001163611 | Nps           | -9258  | 142450844 | 142451044 |
| 7 | 142703139 | 142720338 - | NM_178669    | Clrn3         | 139    | 142719999 | 142720199 |
| 7 | 142703139 | 142720338 - | NM_178669    | Clrn3         | -6072  | 142726410 | 142726610 |
| 7 | 142729507 | 142877978 + | NM_011212    | Ptpre         | -9308  | 142719999 | 142720199 |
| 7 | 142729507 | 142877978 + | NM_011212    | Ptpre         | -2897  | 142726410 | 142726610 |
| 7 | 142881471 | 142908063 - | NM_001081117 | Mki67         | 12298  | 142895565 | 142895765 |
| 7 | 144567252 | 144602440 - | NM_029886    | 9430038I01Rik | -282   | 144602722 | 144602922 |
| 7 | 146027501 | 146037951 - | NM_001045483 | Mapk1ip1      | 662    | 146037089 | 146037289 |
| 7 | 146027501 | 146037951 - | NM_027115    | Mapk1ip1      | 662    | 146037089 | 146037289 |
| 7 | 146038069 | 146074740 + | NM_026391    | Ppp2r2d       | -780   | 146037089 | 146037289 |
| 7 | 146398887 | 146428873 + | NM_027164    | Lrrc27        | 21749  | 146420636 | 146420836 |
| 7 | 146434381 | 146453153 + | NM_001033206 | Pwwp2b        | 4124   | 146438505 | 146438705 |
| 7 | 146434381 | 146453153 + | NM_001033206 | Pwwp2b        | 9650   | 146444031 | 146444231 |



|   |           |             |              |        |       |           |           |
|---|-----------|-------------|--------------|--------|-------|-----------|-----------|
| 7 | 146434381 | 146453153 + | NM_001098636 | Pwvp2b | 4124  | 146438505 | 146438705 |
| 7 | 146434381 | 146453153 + | NM_001098636 | Pwvp2b | 9650  | 146444031 | 146444231 |
| 7 | 146575008 | 146765552 + | NM_001127363 | Inpp5a | 39389 | 146614397 | 146614597 |
| 7 | 146575008 | 146765552 + | NM_001127363 | Inpp5a | 87637 | 146662645 | 146662845 |
| 7 | 146575008 | 146765552 + | NM_001127363 | Inpp5a | -5291 | 146569517 | 146569717 |
| 7 | 146575008 | 146765552 + | NM_183144    | Inpp5a | 39389 | 146614397 | 146614597 |
| 7 | 146575008 | 146765552 + | NM_183144    | Inpp5a | 87637 | 146662645 | 146662845 |
| 7 | 146575008 | 146765552 + | NM_183144    | Inpp5a | -5291 | 146569517 | 146569717 |
| 7 | 147255779 | 147268448 - | NM_001190385 | Caly   | -9908 | 147278356 | 147278556 |
| 7 | 147255779 | 147268448 - | NM_026769    | Caly   | -9908 | 147278356 | 147278556 |
| 7 | 147279295 | 147283103 + | NM_009475    | Prap1  | -739  | 147278356 | 147278556 |
| 7 | 147291622 | 147302323 - | NM_053119    | Echs1  | -3209 | 147305532 | 147305732 |
| 7 | 147291622 | 147302323 - | NM_053119    | Echs1  | -5157 | 147307480 | 147307680 |
| 7 | 147311584 | 147320234 + | NM_153783    | Paox   | -5852 | 147305532 | 147305732 |
| 7 | 147311584 | 147320234 + | NM_153783    | Paox   | -3904 | 147307480 | 147307680 |
| 7 | 148106801 | 148115092 + | NM_133946    | Nlrp6  | -7560 | 148099041 | 148099241 |
| 7 | 148106801 | 148115092 + | NM_133946    | Nlrp6  | -688  | 148105913 | 148106113 |
| 7 | 148127480 | 148133558 + | NM_145387    | Athl1  | -5584 | 148121696 | 148121896 |
| 7 | 148264128 | 148276410 + | NM_001162924 | Pkp3   | -5316 | 148258612 | 148258812 |
| 7 | 148265668 | 148276410 + | NM_019762    | Pkp3   | -6856 | 148258612 | 148258812 |
| 7 | 148454984 | 148462686 - | NM_001114322 | Cdhr5  | -1232 | 148463918 | 148464118 |
| 7 | 148454984 | 148462686 - | NM_028069    | Cdhr5  | -1232 | 148463918 | 148464118 |
| 7 | 148464228 | 148465033 - | NM_001287171 | Sct    | 915   | 148463918 | 148464118 |
| 7 | 148464228 | 148465033 - | NM_001309439 | Sct    | 915   | 148463918 | 148464118 |
| 7 | 148464228 | 148465033 - | NM_011328    | Sct    | 915   | 148463918 | 148464118 |
| 7 | 148578059 | 148588876 + | NM_011528    | Taldo1 | -1847 | 148576012 | 148576212 |
| 7 | 148578059 | 148588876 + | NM_011528    | Taldo1 | 2128  | 148580187 | 148580387 |
| 7 | 148578059 | 148588876 + | NM_011528    | Taldo1 | -949  | 148576910 | 148577110 |
| 7 | 148578059 | 148588876 + | NM_011528    | Taldo1 | -3459 | 148574400 | 148574600 |
| 7 | 148594083 | 148600025 - | NM_172116    | Pddc1  | -6137 | 148606162 | 148606362 |

|   |           |             |              |          |        |           |           |
|---|-----------|-------------|--------------|----------|--------|-----------|-----------|
| 7 | 148612350 | 148615320 - | NM_021316    | Cend1    | -7663  | 148622983 | 148623183 |
| 7 | 148612350 | 148615320 - | NM_021316    | Cend1    | -6598  | 148621918 | 148622118 |
| 7 | 148615648 | 148620494 - | NM_001177576 | Slc25a22 | -2489  | 148622983 | 148623183 |
| 7 | 148615648 | 148620494 - | NM_001177576 | Slc25a22 | -1424  | 148621918 | 148622118 |
| 7 | 148615648 | 148623774 - | NM_026646    | Slc25a22 | 591    | 148622983 | 148623183 |
| 7 | 148615648 | 148623774 - | NM_026646    | Slc25a22 | 1656   | 148621918 | 148622118 |
| 7 | 148679035 | 148725757 - | NM_001142681 | Chid1    | 21963  | 148703594 | 148703794 |
| 7 | 148679035 | 148725757 - | NM_026522    | Chid1    | 21963  | 148703594 | 148703794 |
| 7 | 148748079 | 148818911 + | NM_007459    | Ap2a2    | 47987  | 148796066 | 148796266 |
| 7 | 148795965 | 148799647 - | NR_040337    | Gm16982  | 3381   | 148796066 | 148796266 |
| 7 | 148819948 | 148841208 - | NM_181729    | Muc6     | 1621   | 148839387 | 148839587 |
| 7 | 149067490 | 149088312 - | NM_023764    | Tollip   | 1456   | 149086656 | 149086856 |
| 7 | 149194458 | 149246940 - | NM_028308    | Mob2     | 14850  | 149231890 | 149232090 |
| 7 | 150207689 | 150239592 - | NR_110354    | R74862   | -4137  | 150243729 | 150243929 |
| 7 | 150218526 | 150239592 - | NR_015529    | R74862   | -4137  | 150243729 | 150243929 |
| 7 | 150218526 | 150239592 - | NR_110355    | R74862   | -4137  | 150243729 | 150243929 |
| 7 | 150238655 | 150253836 + | NM_133655    | Cd81     | 5074   | 150243729 | 150243929 |
| 7 | 150257434 | 150280548 - | NM_020277    | Trpm5    | 14701  | 150265647 | 150265847 |
| 7 | 150293159 | 150612948 + | NM_008434    | Kcnq1    | -1712  | 150291247 | 150291447 |
| 7 | 150293159 | 150612948 + | NM_008434    | Kcnq1    | 213492 | 150506651 | 150506851 |
| 7 | 150659660 | 150685238 + | NM_008767    | Slc22a18 | -124   | 150659336 | 150659536 |
| 7 | 150661021 | 150685238 + | NM_001042760 | Slc22a18 | -1485  | 150659336 | 150659536 |
| 7 | 150743135 | 150785996 - | NM_001252593 | Cars     | 4777   | 150781019 | 150781219 |
| 7 | 150743135 | 150785996 - | NM_013742    | Cars     | 4777   | 150781019 | 150781219 |
| 7 | 150820713 | 150835570 - | NM_001311145 | Tnfrsf22 | 0      | 150835543 | 150835743 |
| 7 | 150820713 | 150835570 - | NM_023680    | Tnfrsf22 | 0      | 150835543 | 150835743 |
| 7 | 150949615 | 150952899 - | NM_203492    | Mrgprg   | -1393  | 150954292 | 150954492 |
| 7 | 150964268 | 150970406 - | NM_175534    | Mrgpre   | -687   | 150971093 | 150971293 |
| 7 | 150981497 | 151008758 - | NM_001308095 | Nadsyn1  | 17578  | 150990980 | 150991180 |
| 7 | 150981497 | 151008758 - | NM_030221    | Nadsyn1  | 17578  | 150990980 | 150991180 |

|   |           |             |              |               |        |           |           |
|---|-----------|-------------|--------------|---------------|--------|-----------|-----------|
| 7 | 151009072 | 151034316 + | NM_007856    | Dhcr7         | 11803  | 151020875 | 151021075 |
| 7 | 151361425 | 151608581 + | NM_001113373 | Shank2        | 227124 | 151588549 | 151588749 |
| 7 | 151361425 | 151608581 + | NM_001113373 | Shank2        | 18622  | 151380047 | 151380247 |
| 7 | 151470290 | 151608581 + | NM_001081370 | Shank2        | 118259 | 151588549 | 151588749 |
| 7 | 151764228 | 151768342 - | NM_010175    | Fadd          | 661    | 151767481 | 151767681 |
| 7 | 151774454 | 151924498 - | NM_001242349 | Ano1          | 126737 | 151797561 | 151797761 |
| 7 | 151774454 | 151924498 - | NM_178642    | Ano1          | 126737 | 151797561 | 151797761 |
| 7 | 152082437 | 152086857 + | NM_008003    | Fgf15         | 1849   | 152084286 | 152084486 |
| 8 | 3150922   | 3279618 -   | NM_010568    | Insr          | 13944  | 3265474   | 3265674   |
| 8 | 3150922   | 3279618 -   | NM_010568    | Insr          | 99009  | 3180409   | 3180609   |
| 8 | 3393008   | 3456601 +   | NM_133962    | Arhgef18      | 18973  | 3411981   | 3412181   |
| 8 | 3567998   | 3584777 +   | NM_001024728 | C330021F23Rik | -2925  | 3564873   | 3565073   |
| 8 | 3610090   | 3621297 -   | NM_026156    | Xab2          | 5117   | 3615980   | 3616180   |
| 8 | 3621551   | 3624236 +   | NM_001195244 | Pet100        | -5371  | 3615980   | 3616180   |
| 8 | 3743395   | 3748985 -   | NM_133238    | Cd209a        | -5366  | 3754351   | 3754551   |
| 8 | 4209543   | 4217313 -   | NM_207203    | Prr36         | 5752   | 4211361   | 4211561   |
| 8 | 4325210   | 4360021 +   | NR_033527    | Ccl25         | 25522  | 4350732   | 4350932   |
| 8 | 4349588   | 4360021 +   | NM_009138    | Ccl25         | 1144   | 4350732   | 4350932   |
| 8 | 4493405   | 4526080 +   | NM_026058    | Cers4         | -666   | 4492539   | 4492739   |
| 8 | 8617439   | 8660774 -   | NM_010111    | Efnb2         | 8774   | 8651800   | 8652000   |
| 8 | 8666576   | 8690538 -   | NM_176849    | Arglu1        | 13602  | 8676736   | 8676936   |
| 8 | 8666576   | 8690538 -   | NM_176849    | Arglu1        | 10576  | 8679762   | 8679962   |
| 8 | 10006633  | 10036000 +  | NM_033622    | Tnfsf13b      | -71    | 10006362  | 10006562  |
| 8 | 10153923  | 10633951 +  | NM_001081397 | Myo16         | 463989 | 10617912  | 10618112  |
| 8 | 10924427  | 10928458 -  | NR_030715    | 3930402G23Rik | -7801  | 10936259  | 10936459  |
| 8 | 11007850  | 11054542 +  | NR_046017    | 9530052E02Rik | 45728  | 11053578  | 11053778  |
| 8 | 11453977  | 11478500 -  | NM_011227    | Rab20         | 265    | 11478035  | 11478235  |
| 8 | 11477929  | 11480242 +  | NR_126558    | E230013L22Rik | 106    | 11478035  | 11478235  |
| 8 | 11514017  | 11550772 -  | NM_024248    | Cars2         | -7195  | 11557967  | 11558167  |
| 8 | 11514017  | 11550772 -  | NM_024248    | Cars2         | -3670  | 11554442  | 11554642  |

|   |          |            |              |         |       |          |          |
|---|----------|------------|--------------|---------|-------|----------|----------|
| 8 | 11555762 | 11563252 + | NM_001302458 | Ing1    | 2205  | 11557967 | 11558167 |
| 8 | 11555762 | 11563252 + | NM_001302458 | Ing1    | -1120 | 11554442 | 11554642 |
| 8 | 11556063 | 11563252 + | NM_001302457 | Ing1    | 1904  | 11557967 | 11558167 |
| 8 | 11556063 | 11563252 + | NM_001302457 | Ing1    | -1421 | 11554442 | 11554642 |
| 8 | 11556065 | 11563252 + | NM_001302451 | Ing1    | 1902  | 11557967 | 11558167 |
| 8 | 11556065 | 11563252 + | NM_001302451 | Ing1    | -1423 | 11554442 | 11554642 |
| 8 | 11556065 | 11563252 + | NM_001302460 | Ing1    | 1902  | 11557967 | 11558167 |
| 8 | 11556065 | 11563252 + | NM_001302460 | Ing1    | -1423 | 11554442 | 11554642 |
| 8 | 11556457 | 11563252 + | NM_011919    | Ing1    | 1510  | 11557967 | 11558167 |
| 8 | 11556457 | 11563252 + | NM_011919    | Ing1    | -1815 | 11554442 | 11554642 |
| 8 | 11558410 | 11563252 + | NM_001302459 | Ing1    | -243  | 11557967 | 11558167 |
| 8 | 11558410 | 11563252 + | NM_001302459 | Ing1    | -3768 | 11554442 | 11554642 |
| 8 | 11611581 | 11635758 - | NM_001281974 | Ankrd10 | 3024  | 11632534 | 11632734 |
| 8 | 11611581 | 11635758 - | NM_001281975 | Ankrd10 | 3024  | 11632534 | 11632734 |
| 8 | 11611581 | 11635758 - | NM_133971    | Ankrd10 | 3024  | 11632534 | 11632734 |
| 8 | 11613841 | 11635758 - | NM_001167967 | Ankrd10 | 3024  | 11632534 | 11632734 |
| 8 | 11613841 | 11635037 - | NR_030781    | Ankrd10 | 2303  | 11632534 | 11632734 |
| 8 | 11728105 | 11827153 + | NM_001113517 | Arhgef7 | 64619 | 11792724 | 11792924 |
| 8 | 11728105 | 11827153 + | NM_001113517 | Arhgef7 | 47837 | 11775942 | 11776142 |
| 8 | 11758330 | 11835218 + | NM_001113518 | Arhgef7 | 34394 | 11792724 | 11792924 |
| 8 | 11758330 | 11835218 + | NM_001113518 | Arhgef7 | 17612 | 11775942 | 11776142 |
| 8 | 11758330 | 11835218 + | NM_017402    | Arhgef7 | 34394 | 11792724 | 11792924 |
| 8 | 11758330 | 11835218 + | NM_017402    | Arhgef7 | 17612 | 11775942 | 11776142 |
| 8 | 12915893 | 13020510 + | NM_178076    | Mcf2l   | 25438 | 12941331 | 12941531 |
| 8 | 12947941 | 12948071 + | NR_128567    | Gm38671 | -6410 | 12941331 | 12941531 |
| 8 | 12949418 | 13020510 + | NM_001159485 | Mcf2l   | -7887 | 12941331 | 12941531 |
| 8 | 12949418 | 13020510 + | NM_001159486 | Mcf2l   | -7887 | 12941331 | 12941531 |
| 8 | 13159135 | 13175339 + | NM_010684    | Lamp1   | 4513  | 13163648 | 13163848 |
| 8 | 13567218 | 13677588 - | NM_009025    | Rasa3   | 67300 | 13610088 | 13610288 |
| 8 | 13884788 | 13890272 - | NM_025556    | Coprs   | -7241 | 13897513 | 13897713 |

|   |          |            |              |               |         |          |          |
|---|----------|------------|--------------|---------------|---------|----------|----------|
| 8 | 13884788 | 13890272 - | NM_025556    | Coprs         | -6705   | 13896977 | 13897177 |
| 8 | 14027565 | 14090328 - | NM_001034862 | Erich1        | 5156    | 14084972 | 14085172 |
| 8 | 14095875 | 14847687 + | NM_001145965 | Dlgap2        | 210891  | 14306766 | 14306966 |
| 8 | 14095875 | 14847687 + | NM_172910    | Dlgap2        | 210891  | 14306766 | 14306966 |
| 8 | 14888536 | 14901720 + | NM_012000    | Cln8          | -427    | 14887909 | 14888109 |
| 8 | 14888536 | 14901720 + | NM_012000    | Cln8          | 1802    | 14890338 | 14890538 |
| 8 | 14911663 | 15001086 + | NM_001037736 | Arhgef10      | 76410   | 14988073 | 14988273 |
| 8 | 14911663 | 15001086 + | NM_001037736 | Arhgef10      | 56843   | 14968506 | 14968706 |
| 8 | 14911663 | 15001086 + | NM_172751    | Arhgef10      | 76410   | 14988073 | 14988273 |
| 8 | 14911663 | 15001086 + | NM_172751    | Arhgef10      | 56843   | 14968506 | 14968706 |
| 8 | 15892545 | 17535386 - | NM_053171    | Csmd1         | 1457050 | 16078136 | 16078336 |
| 8 | 18595173 | 18803189 + | NM_173189    | Mcph1         | 187254  | 18782427 | 18782627 |
| 8 | 18595173 | 18803189 + | NM_173189    | Mcph1         | 201728  | 18796901 | 18797101 |
| 8 | 18595173 | 18803189 + | NM_173189    | Mcph1         | 197063  | 18792236 | 18792436 |
| 8 | 18595173 | 18803189 + | NM_173189    | Mcph1         | -151    | 18594822 | 18595022 |
| 8 | 18595173 | 18803189 + | NM_173189    | Mcph1         | 174005  | 18769178 | 18769378 |
| 8 | 18595173 | 18803189 + | NM_173189    | Mcph1         | 143917  | 18739090 | 18739290 |
| 8 | 18690263 | 18741563 - | NM_007426    | Angpt2        | 2273    | 18739090 | 18739290 |
| 8 | 18846279 | 18884414 + | NM_026792    | Agpat5        | -5829   | 18840250 | 18840450 |
| 8 | 18932729 | 18950976 - | NM_001113350 | Xkr5          | 4486    | 18946290 | 18946490 |
| 8 | 18932729 | 18950872 - | NM_001286469 | Xkr5          | 4382    | 18946290 | 18946490 |
| 8 | 18932729 | 18950976 - | NM_176951    | Xkr5          | 4486    | 18946290 | 18946490 |
| 8 | 19863864 | 19893011 - | NR_030708    | 6820431F20Rik | 7541    | 19885270 | 19885470 |
| 8 | 19863864 | 19893011 - | NR_030708    | 6820431F20Rik | -6381   | 19899392 | 19899592 |
| 8 | 19863864 | 19893011 - | NR_030708    | 6820431F20Rik | -1676   | 19894687 | 19894887 |
| 8 | 19863864 | 19893011 - | NR_030708    | 6820431F20Rik | 8728    | 19884083 | 19884283 |
| 8 | 19863864 | 19893011 - | NR_030708    | 6820431F20Rik | 11643   | 19881168 | 19881368 |
| 8 | 19933242 | 19958781 - | NM_001177408 | Gm15319       | 19155   | 19939426 | 19939626 |
| 8 | 19933242 | 19958781 - | NM_001177408 | Gm15319       | 12173   | 19946408 | 19946608 |
| 8 | 19933242 | 19958781 - | NM_001177408 | Gm15319       | -9923   | 19968704 | 19968904 |

|   |          |            |                |               |       |          |          |
|---|----------|------------|----------------|---------------|-------|----------|----------|
| 8 | 19933242 | 19958781 - | NM_001177408   | Gm15319       | -4282 | 19963063 | 19963263 |
| 8 | 19933242 | 19958781 - | NM_001177408   | Gm15319       | 5303  | 19953278 | 19953478 |
| 8 | 19933242 | 19958781 - | NM_001177408   | Gm15319       | 16235 | 19942346 | 19942546 |
| 8 | 19933242 | 19958781 - | NM_001177408   | Gm15319       | 14075 | 19944506 | 19944706 |
| 8 | 19933242 | 19958781 - | NM_001177408   | Gm15319       | 15015 | 19943566 | 19943766 |
| 8 | 19933242 | 19958781 - | NM_001177408   | Gm15319       | 17100 | 19941481 | 19941681 |
| 8 | 19933242 | 19958781 - | NM_001177408   | Gm15319       | 17786 | 19940795 | 19940995 |
| 8 | 19933242 | 19958781 - | NM_001177408   | Gm15319       | 20153 | 19938428 | 19938628 |
| 8 | 19933242 | 19958781 - | NM_001270553.1 | Gm21119       | 19155 | 19939426 | 19939626 |
| 8 | 19933242 | 19958781 - | NM_001270553.1 | Gm21119       | 12173 | 19946408 | 19946608 |
| 8 | 19933242 | 19958781 - | NM_001270553.1 | Gm21119       | -9923 | 19968704 | 19968904 |
| 8 | 19933242 | 19958781 - | NM_001270553.1 | Gm21119       | -4282 | 19963063 | 19963263 |
| 8 | 19933242 | 19958781 - | NM_001270553.1 | Gm21119       | 5303  | 19953278 | 19953478 |
| 8 | 19933242 | 19958781 - | NM_001270553.1 | Gm21119       | 16235 | 19942346 | 19942546 |
| 8 | 19933242 | 19958781 - | NM_001270553.1 | Gm21119       | 14075 | 19944506 | 19944706 |
| 8 | 19933242 | 19958781 - | NM_001270553.1 | Gm21119       | 15015 | 19943566 | 19943766 |
| 8 | 19933242 | 19958781 - | NM_001270553.1 | Gm21119       | 17100 | 19941481 | 19941681 |
| 8 | 19933242 | 19958781 - | NM_001270553.1 | Gm21119       | 17786 | 19940795 | 19940995 |
| 8 | 19933242 | 19958781 - | NM_001270553.1 | Gm21119       | 20153 | 19938428 | 19938628 |
| 8 | 19981360 | 20020393 - | NR_028428      | 2610005L07Rik | 0     | 20020326 | 20020526 |
| 8 | 19981360 | 20020393 - | NR_028428      | 2610005L07Rik | -6294 | 20026687 | 20026887 |
| 8 | 19981360 | 20020393 - | NR_028428      | 2610005L07Rik | 35075 | 19985118 | 19985318 |
| 8 | 19981360 | 20020393 - | NR_028428      | 2610005L07Rik | 11941 | 20008252 | 20008452 |
| 8 | 19981360 | 20020393 - | NR_028428      | 2610005L07Rik | 7602  | 20012591 | 20012791 |
| 8 | 19981360 | 20020393 - | NR_028428      | 2610005L07Rik | 8444  | 20011749 | 20011949 |
| 8 | 19981360 | 20020393 - | NR_028428      | 2610005L07Rik | 30479 | 19989714 | 19989914 |
| 8 | 19981360 | 20020393 - | NR_028428      | 2610005L07Rik | 34462 | 19985731 | 19985931 |
| 8 | 19981360 | 20020393 - | NR_028428      | 2610005L07Rik | 35602 | 19984591 | 19984791 |
| 8 | 19981360 | 20020393 - | NR_028428      | 2610005L07Rik | 37489 | 19982704 | 19982904 |
| 8 | 19991156 | 20020279 - | NR_030708.1    | 6820431F20Rik | -47   | 20020326 | 20020526 |

|   |          |            |              |               |       |          |          |
|---|----------|------------|--------------|---------------|-------|----------|----------|
| 8 | 19991156 | 20020279 - | NR_030708.1  | 6820431F20Rik | -6408 | 20026687 | 20026887 |
| 8 | 19991156 | 20020279 - | NR_030708.1  | 6820431F20Rik | 11827 | 20008252 | 20008452 |
| 8 | 19991156 | 20020279 - | NR_030708.1  | 6820431F20Rik | 7488  | 20012591 | 20012791 |
| 8 | 19991156 | 20020279 - | NR_030708.1  | 6820431F20Rik | 8330  | 20011749 | 20011949 |
| 8 | 23104820 | 23170547 - | NM_007511    | Atp7b         | 5198  | 23165149 | 23165349 |
| 8 | 23104820 | 23170547 - | NM_007511    | Atp7b         | 46770 | 23123577 | 23123777 |
| 8 | 23171193 | 23182100 + | NM_001243161 | Alg11         | -5844 | 23165149 | 23165349 |
| 8 | 23171193 | 23182100 + | NM_183142    | Alg11         | -5844 | 23165149 | 23165349 |
| 8 | 23171193 | 23182100 + | NR_040650    | Alg11         | -5844 | 23165149 | 23165349 |
| 8 | 23238755 | 23276908 - | NM_011848    | Nek3          | 12018 | 23264690 | 23264890 |
| 8 | 23238758 | 23272967 - | NM_001162947 | Nek3          | 8077  | 23264690 | 23264890 |
| 8 | 23393913 | 23481891 + | NM_199257    | Tpte          | 82476 | 23476389 | 23476589 |
| 8 | 23393913 | 23481891 + | NM_199257    | Tpte          | 76603 | 23470516 | 23470716 |
| 8 | 23486022 | 23509094 - | NM_181325    | Slc25a15      | 3861  | 23505033 | 23505233 |
| 8 | 23509193 | 23510064 + | NR_045473    | 1810012K16Rik | -3960 | 23505033 | 23505233 |
| 8 | 23521812 | 23540138 + | NM_020560    | Mrps31        | 3005  | 23524817 | 23525017 |
| 8 | 23521812 | 23540138 + | NM_020560    | Mrps31        | 15669 | 23537481 | 23537681 |
| 8 | 23521812 | 23540138 + | NM_020560    | Mrps31        | 792   | 23522604 | 23522804 |
| 8 | 23573086 | 23587352 - | NM_001012667 | Smim19        | -4525 | 23591877 | 23592077 |
| 8 | 23573086 | 23587352 - | NM_001012667 | Smim19        | -522  | 23587874 | 23588074 |
| 8 | 23573086 | 23587352 - | NM_001146117 | Smim19        | -4525 | 23591877 | 23592077 |
| 8 | 23573086 | 23587352 - | NM_001146117 | Smim19        | -522  | 23587874 | 23588074 |
| 8 | 23587172 | 23680089 + | NM_011394    | Slc20a2       | 4705  | 23591877 | 23592077 |
| 8 | 23587172 | 23680089 + | NM_011394    | Slc20a2       | 702   | 23587874 | 23588074 |
| 8 | 23897826 | 23916127 - | NM_001122820 | Ap3m2         | -3510 | 23919637 | 23919837 |
| 8 | 23897826 | 23916127 - | NM_029505    | Ap3m2         | -3510 | 23919637 | 23919837 |
| 8 | 23970011 | 24053735 + | NM_001081149 | Kat6a         | 1504  | 23971515 | 23971715 |
| 8 | 24085308 | 24260970 + | NM_001110783 | Ank1          | 53280 | 24138588 | 24138788 |
| 8 | 24085308 | 24260970 + | NM_001277280 | Ank1          | 53280 | 24138588 | 24138788 |
| 8 | 24145571 | 24260970 + | NM_001277281 | Ank1          | -6783 | 24138588 | 24138788 |

|   |          |            |              |          |        |          |          |
|---|----------|------------|--------------|----------|--------|----------|----------|
| 8 | 24145571 | 24260970 + | NM_001277284 | Ank1     | -6783  | 24138588 | 24138788 |
| 8 | 24283418 | 24318926 - | NM_018743    | Agpat6   | 9595   | 24309131 | 24309331 |
| 8 | 24780133 | 25173589 + | NM_001277239 | Zmat4    | 89158  | 24869291 | 24869491 |
| 8 | 24780133 | 25173589 + | NM_001277239 | Zmat4    | 132547 | 24912680 | 24912880 |
| 8 | 24780133 | 25173589 + | NM_001277239 | Zmat4    | 111529 | 24891662 | 24891862 |
| 8 | 24780133 | 25173589 + | NM_001277239 | Zmat4    | 97689  | 24877822 | 24878022 |
| 8 | 24780133 | 25173589 + | NM_001277239 | Zmat4    | 80024  | 24860157 | 24860357 |
| 8 | 24780133 | 25173589 + | NM_177086    | Zmat4    | 89158  | 24869291 | 24869491 |
| 8 | 24780133 | 25173589 + | NM_177086    | Zmat4    | 132547 | 24912680 | 24912880 |
| 8 | 24780133 | 25173589 + | NM_177086    | Zmat4    | 111529 | 24891662 | 24891862 |
| 8 | 24780133 | 25173589 + | NM_177086    | Zmat4    | 97689  | 24877822 | 24878022 |
| 8 | 24780133 | 25173589 + | NM_177086    | Zmat4    | 80024  | 24860157 | 24860357 |
| 8 | 25787706 | 25836298 - | NM_009619    | Adam3    | 5416   | 25830682 | 25830882 |
| 8 | 26712073 | 26788445 + | NM_001308481 | Whsc111  | 28101  | 26740174 | 26740374 |
| 8 | 26712756 | 26788445 + | NM_001001735 | Whsc111  | 27418  | 26740174 | 26740374 |
| 8 | 26712756 | 26785383 + | NM_001308482 | Whsc111  | 27418  | 26740174 | 26740374 |
| 8 | 26830520 | 26835360 + | NM_001293703 | Ppapdc1b | 325    | 26830845 | 26831045 |
| 8 | 26830520 | 26835360 + | NM_028000    | Ppapdc1b | 325    | 26830845 | 26831045 |
| 8 | 26830520 | 26835360 + | NR_121642    | Ppapdc1b | 325    | 26830845 | 26831045 |
| 8 | 26830520 | 26835360 + | NR_121643    | Ppapdc1b | 325    | 26830845 | 26831045 |
| 8 | 26835796 | 26864753 - | NM_028102    | Ddhd2    | -2312  | 26867065 | 26867265 |
| 8 | 26875011 | 26895682 - | NM_026121    | Bag4     | 694    | 26894788 | 26894988 |
| 8 | 26875011 | 26895682 - | NM_026121    | Bag4     | 2070   | 26893412 | 26893612 |
| 8 | 26896063 | 26914448 + | NM_026032    | Lsm1     | -1075  | 26894788 | 26894988 |
| 8 | 26896063 | 26914448 + | NM_026032    | Lsm1     | 14340  | 26910403 | 26910603 |
| 8 | 26896063 | 26914448 + | NM_026032    | Lsm1     | -2451  | 26893412 | 26893612 |
| 8 | 26918985 | 26926455 + | NM_011485    | Star     | 3467   | 26922452 | 26922652 |
| 8 | 26918985 | 26926455 + | NM_011485    | Star     | -8382  | 26910403 | 26910603 |
| 8 | 26926473 | 26958167 - | NM_001080793 | Ash2l    | 28231  | 26929736 | 26929936 |
| 8 | 26926473 | 26958167 - | NM_001080793 | Ash2l    | 5315   | 26952652 | 26952852 |



|   |          |            |              |               |       |          |          |
|---|----------|------------|--------------|---------------|-------|----------|----------|
| 8 | 26926473 | 26958167 - | NM_001080793 | Ash2l         | 18507 | 26939460 | 26939660 |
| 8 | 26926473 | 26950930 - | NM_001286207 | Ash2l         | 20994 | 26929736 | 26929936 |
| 8 | 26926473 | 26950930 - | NM_001286207 | Ash2l         | -1722 | 26952652 | 26952852 |
| 8 | 26926473 | 26950930 - | NM_001286207 | Ash2l         | 11270 | 26939460 | 26939660 |
| 8 | 26926473 | 26951260 - | NM_011791    | Ash2l         | 21324 | 26929736 | 26929936 |
| 8 | 26926473 | 26951260 - | NM_011791    | Ash2l         | -1392 | 26952652 | 26952852 |
| 8 | 26926473 | 26951260 - | NM_011791    | Ash2l         | 11600 | 26939460 | 26939660 |
| 8 | 26960095 | 27048407 + | NM_008432    | Kcnu1         | 38053 | 26998148 | 26998348 |
| 8 | 26960095 | 27048407 + | NM_008432    | Kcnu1         | 58766 | 27018861 | 27019061 |
| 8 | 26960095 | 27048407 + | NM_008432    | Kcnu1         | -7243 | 26952652 | 26952852 |
| 8 | 27131893 | 27229697 - | NM_207659    | Hook3         | -3325 | 27233022 | 27233222 |
| 8 | 27131893 | 27229697 - | NM_207659    | Hook3         | 25321 | 27204176 | 27204376 |
| 8 | 27193081 | 27206993 + | NR_110583    | 1700047A11Rik | 11095 | 27204176 | 27204376 |
| 8 | 27229852 | 27254342 + | NM_029965    | Rnf170        | 3170  | 27233022 | 27233222 |
| 8 | 28153027 | 28160714 + | NM_001039077 | Prosc         | -1200 | 28151627 | 28151827 |
| 8 | 28153027 | 28160714 + | NM_001039078 | Prosc         | -1200 | 28151627 | 28151827 |
| 8 | 28153027 | 28166605 + | NM_054057    | Prosc         | -1200 | 28151627 | 28151827 |
| 8 | 28234304 | 28239105 - | NM_025686    | Brf2          | -8478 | 28247583 | 28247783 |
| 8 | 28249245 | 28285119 - | NM_001080813 | Rab11fip1     | 8001  | 28276918 | 28277118 |
| 8 | 28249245 | 28285119 - | NM_001080813 | Rab11fip1     | 12508 | 28272411 | 28272611 |
| 8 | 28249245 | 28285119 - | NM_001080813 | Rab11fip1     | 18690 | 28266229 | 28266429 |
| 8 | 28249245 | 28285119 - | NM_029423    | Rab11fip1     | 8001  | 28276918 | 28277118 |
| 8 | 28249245 | 28285119 - | NM_029423    | Rab11fip1     | 12508 | 28272411 | 28272611 |
| 8 | 28249245 | 28285119 - | NM_029423    | Rab11fip1     | 18690 | 28266229 | 28266429 |
| 8 | 28253382 | 28260179 + | NR_045840    | 4933416M07Rik | -5599 | 28247583 | 28247783 |
| 8 | 28370799 | 28386129 + | NM_007918    | Eif4ebp1      | -4201 | 28366398 | 28366598 |
| 8 | 34730058 | 34752449 - | NM_178648    | Ubxn8         | 250   | 34751999 | 34752199 |
| 8 | 34730058 | 34752449 - | NM_178648    | Ubxn8         | -9718 | 34762167 | 34762367 |
| 8 | 34763710 | 34808635 + | NM_010344    | Gsr           | 35159 | 34798869 | 34799069 |
| 8 | 34763710 | 34808635 + | NM_010344    | Gsr           | -642  | 34762868 | 34763068 |

|   |          |            |              |               |        |          |          |
|---|----------|------------|--------------|---------------|--------|----------|----------|
| 8 | 34763710 | 34808635 + | NM_010344    | Gsr           | -1343  | 34762167 | 34762367 |
| 8 | 34842386 | 34887646 + | NM_001167921 | Gtf2e2        | -9633  | 34832553 | 34832753 |
| 8 | 34842539 | 34887646 + | NM_026584    | Gtf2e2        | -9786  | 34832553 | 34832753 |
| 8 | 35153475 | 35171767 - | NM_001293757 | Dctn6         | 762    | 35170805 | 35171005 |
| 8 | 35153475 | 35171767 - | NM_001293757 | Dctn6         | 11153  | 35160414 | 35160614 |
| 8 | 35153475 | 35170869 - | NM_001293758 | Dctn6         | 0      | 35170805 | 35171005 |
| 8 | 35153475 | 35170869 - | NM_001293758 | Dctn6         | 10255  | 35160414 | 35160614 |
| 8 | 35153475 | 35171767 - | NM_001293759 | Dctn6         | 762    | 35170805 | 35171005 |
| 8 | 35153475 | 35171767 - | NM_001293759 | Dctn6         | 11153  | 35160414 | 35160614 |
| 8 | 35153475 | 35171767 - | NM_011722    | Dctn6         | 762    | 35170805 | 35171005 |
| 8 | 35153475 | 35171767 - | NM_011722    | Dctn6         | 11153  | 35160414 | 35160614 |
| 8 | 35178084 | 35188240 + | NM_001126314 | Mboat4        | -7079  | 35170805 | 35171005 |
| 8 | 35198626 | 35209794 - | NM_026609    | Leprotl1      | 471    | 35209123 | 35209323 |
| 8 | 35217617 | 35233902 + | NM_026432    | Saraf         | -8294  | 35209123 | 35209323 |
| 8 | 35892233 | 36028745 - | NM_175091    | Tnks          | 1139   | 36027406 | 36027606 |
| 8 | 37157882 | 37210842 + | NM_172911    | D8Ertd82e     | 3051   | 37160933 | 37161133 |
| 8 | 37552245 | 37576068 + | NM_176952    | 6430573F11Rik | 1959   | 37554204 | 37554404 |
| 8 | 41577892 | 41601202 - | NM_001271542 | Cnot7         | -8432  | 41609634 | 41609834 |
| 8 | 41597137 | 41636489 + | NM_033560    | Vps37a        | 12497  | 41609634 | 41609834 |
| 8 | 41635513 | 41720147 - | NM_001040699 | Mtusr7        | -5868  | 41726015 | 41726215 |
| 8 | 42076266 | 42219081 - | NM_001005863 | Mtus1         | -1131  | 42220212 | 42220412 |
| 8 | 42076266 | 42219081 - | NM_001005863 | Mtus1         | -2122  | 42221203 | 42221403 |
| 8 | 42076266 | 42219081 - | NM_001005863 | Mtus1         | 141802 | 42077079 | 42077279 |
| 8 | 42076266 | 42219081 - | NM_001005863 | Mtus1         | 95347  | 42123534 | 42123734 |
| 8 | 42076266 | 42219081 - | NM_001005863 | Mtus1         | 115990 | 42102891 | 42103091 |
| 8 | 42076266 | 42140151 - | NM_001005864 | Mtus1         | 62872  | 42077079 | 42077279 |
| 8 | 42076266 | 42140151 - | NM_001005864 | Mtus1         | 16417  | 42123534 | 42123734 |
| 8 | 42076266 | 42140151 - | NM_001005864 | Mtus1         | 37060  | 42102891 | 42103091 |
| 8 | 42076266 | 42127286 - | NM_001005865 | Mtus1         | 50007  | 42077079 | 42077279 |
| 8 | 42076266 | 42127286 - | NM_001005865 | Mtus1         | 3552   | 42123534 | 42123734 |

|   |          |            |              |               |        |          |          |
|---|----------|------------|--------------|---------------|--------|----------|----------|
| 8 | 42076266 | 42127286 - | NM_001005865 | Mtus1         | 24195  | 42102891 | 42103091 |
| 8 | 42076266 | 42200022 - | NM_001286413 | Mtus1         | 122743 | 42077079 | 42077279 |
| 8 | 42076266 | 42200022 - | NM_001286413 | Mtus1         | 76288  | 42123534 | 42123734 |
| 8 | 42076266 | 42200022 - | NM_001286413 | Mtus1         | 96931  | 42102891 | 42103091 |
| 8 | 42102822 | 42109571 + | NR_015457    | B430010I23Rik | 69     | 42102891 | 42103091 |
| 8 | 46035562 | 46137612 + | NM_001081286 | Fat1          | 64518  | 46100080 | 46100280 |
| 8 | 46035562 | 46137612 + | NM_001081286 | Fat1          | 85024  | 46120586 | 46120786 |
| 8 | 46035562 | 46137612 + | NM_001081286 | Fat1          | 6822   | 46042384 | 46042584 |
| 8 | 46035562 | 46137612 + | NM_001081286 | Fat1          | 15053  | 46050615 | 46050815 |
| 8 | 46035562 | 46137612 + | NM_001081286 | Fat1          | 12732  | 46048294 | 46048494 |
| 8 | 46391156 | 46418551 - | NM_133969    | Cyp4v3        | 3577   | 46414774 | 46414974 |
| 8 | 46593142 | 46913261 + | NM_001205219 | Sorbs2        | 283164 | 46876306 | 46876506 |
| 8 | 46593142 | 46913261 + | NM_172752    | Sorbs2        | 283164 | 46876306 | 46876506 |
| 8 | 46713105 | 46913261 + | NM_001310707 | Sorbs2        | 163201 | 46876306 | 46876506 |
| 8 | 46747347 | 46913261 + | NM_001310708 | Sorbs2        | 128959 | 46876306 | 46876506 |
| 8 | 46808679 | 46904652 - | NR_045739    | Sorbs2os      | 28146  | 46876306 | 46876506 |
| 8 | 47292698 | 47296364 - | NM_007450    | Slc25a4       | 505    | 47295659 | 47295859 |
| 8 | 47556391 | 47621406 + | NM_007981    | Acsl1         | 30069  | 47586460 | 47586660 |
| 8 | 47556391 | 47621406 + | NM_007981    | Acsl1         | 8875   | 47565266 | 47565466 |
| 8 | 47576320 | 47621406 + | NM_001302163 | Acsl1         | 10140  | 47586460 | 47586660 |
| 8 | 47660948 | 47702555 - | NM_001001184 | Primpol       | 5446   | 47696909 | 47697109 |
| 8 | 47660948 | 47702555 - | NM_001001184 | Primpol       | 14239  | 47688116 | 47688316 |
| 8 | 47660948 | 47702555 - | NM_001001184 | Primpol       | 17642  | 47684713 | 47684913 |
| 8 | 47702645 | 47725053 + | NM_001284409 | Casp3         | -5536  | 47696909 | 47697109 |
| 8 | 47702645 | 47725053 + | NM_009810    | Casp3         | -5536  | 47696909 | 47697109 |
| 8 | 47816324 | 47824870 - | NR_045750    | Gm16675       | -3240  | 47828110 | 47828310 |
| 8 | 47816324 | 47824870 - | NR_045750    | Gm16675       | -2733  | 47827603 | 47827803 |
| 8 | 47825099 | 47932813 + | NM_008391    | Irf2          | 92833  | 47917932 | 47918132 |
| 8 | 47825099 | 47932813 + | NM_008391    | Irf2          | 20971  | 47846070 | 47846270 |
| 8 | 47825099 | 47932813 + | NM_008391    | Irf2          | 71764  | 47896863 | 47897063 |

|   |          |            |              |               |        |          |          |
|---|----------|------------|--------------|---------------|--------|----------|----------|
| 8 | 47825099 | 47932813 + | NM_008391    | Irf2          | 25318  | 47850417 | 47850617 |
| 8 | 47825099 | 47932813 + | NM_008391    | Irf2          | 3011   | 47828110 | 47828310 |
| 8 | 47825099 | 47932813 + | NM_008391    | Irf2          | 2504   | 47827603 | 47827803 |
| 8 | 48912964 | 49075906 - | NM_133791    | Wwc2          | 15563  | 49060143 | 49060343 |
| 8 | 49311019 | 49760045 - | NM_001145937 | Tenm3         | 4692   | 49755153 | 49755353 |
| 8 | 49311019 | 49760045 - | NM_011857    | Tenm3         | 4692   | 49755153 | 49755353 |
| 8 | 55635684 | 55673190 + | NM_029569    | Asb5          | 15352  | 55651036 | 55651236 |
| 8 | 59010319 | 59029364 - | NM_001009951 | Cep44         | -2226  | 59031590 | 59031790 |
| 8 | 59029931 | 59072737 + | NM_015791    | Fbxo8         | 1659   | 59031590 | 59031790 |
| 8 | 59934720 | 59956383 + | NM_009136    | Scrg1         | 12817  | 59947537 | 59947737 |
| 8 | 59961499 | 59966658 - | NM_021788    | Sap30         | 521    | 59965937 | 59966137 |
| 8 | 59966760 | 59989060 + | NR_126553    | 2500002B13Rik | -623   | 59965937 | 59966137 |
| 8 | 59966760 | 59985528 + | NR_126555    | 2500002B13Rik | -623   | 59965937 | 59966137 |
| 8 | 60002622 | 60131853 - | NM_001167981 | Galnt7        | 5291   | 60126362 | 60126562 |
| 8 | 60002622 | 60131853 - | NM_001167981 | Galnt7        | 71704  | 60059949 | 60060149 |
| 8 | 60002622 | 60131853 - | NM_001167981 | Galnt7        | 37392  | 60094261 | 60094461 |
| 8 | 60002622 | 60131853 - | NM_001167981 | Galnt7        | 50669  | 60080984 | 60081184 |
| 8 | 60002622 | 60131853 - | NM_001167981 | Galnt7        | 76515  | 60055138 | 60055338 |
| 8 | 60002622 | 60131853 - | NM_001167981 | Galnt7        | 114469 | 60017184 | 60017384 |
| 8 | 60002622 | 60131853 - | NM_144731    | Galnt7        | 5291   | 60126362 | 60126562 |
| 8 | 60002622 | 60131853 - | NM_144731    | Galnt7        | 71704  | 60059949 | 60060149 |
| 8 | 60002622 | 60131853 - | NM_144731    | Galnt7        | 37392  | 60094261 | 60094461 |
| 8 | 60002622 | 60131853 - | NM_144731    | Galnt7        | 50669  | 60080984 | 60081184 |
| 8 | 60002622 | 60131853 - | NM_144731    | Galnt7        | 76515  | 60055138 | 60055338 |
| 8 | 60002622 | 60131853 - | NM_144731    | Galnt7        | 114469 | 60017184 | 60017384 |
| 8 | 60130550 | 60142228 + | NR_040698    | AW046200      | -3988  | 60126362 | 60126562 |
| 8 | 63389186 | 63462109 - | NM_007711    | Clcn3         | 28370  | 63433539 | 63433739 |
| 8 | 63389186 | 63462109 - | NM_173873    | Clcn3         | 28370  | 63433539 | 63433739 |
| 8 | 63389186 | 63462109 - | NM_173874    | Clcn3         | 28370  | 63433539 | 63433739 |
| 8 | 63389186 | 63433597 - | NM_173876    | Clcn3         | 0      | 63433539 | 63433739 |

|   |          |            |              |        |        |          |          |
|---|----------|------------|--------------|--------|--------|----------|----------|
| 8 | 63471990 | 63610144 + | NM_001293637 | Nek1   | 684    | 63472674 | 63472874 |
| 8 | 63471990 | 63610144 + | NM_001293638 | Nek1   | 684    | 63472674 | 63472874 |
| 8 | 63471990 | 63610144 + | NM_001293639 | Nek1   | 684    | 63472674 | 63472874 |
| 8 | 63471990 | 63610144 + | NM_175089    | Nek1   | 684    | 63472674 | 63472874 |
| 8 | 63702968 | 63874870 + | NM_021506    | Sh3rf1 | 12386  | 63715354 | 63715554 |
| 8 | 63702968 | 63874870 + | NM_021506    | Sh3rf1 | 81472  | 63784440 | 63784640 |
| 8 | 63702968 | 63874870 + | NM_021506    | Sh3rf1 | 51027  | 63753995 | 63754195 |
| 8 | 63702968 | 63874870 + | NM_021506    | Sh3rf1 | 23552  | 63726520 | 63726720 |
| 8 | 63966531 | 63982298 + | NM_145595    | Cbr4   | 14595  | 63981126 | 63981326 |
| 8 | 63990226 | 64381492 - | NM_001293772 | Palld  | 187812 | 64193480 | 64193680 |
| 8 | 63990226 | 64381492 - | NM_001293772 | Palld  | 84545  | 64296747 | 64296947 |
| 8 | 63990226 | 64381492 - | NM_001293772 | Palld  | 77808  | 64303484 | 64303684 |
| 8 | 63990226 | 64381492 - | NM_001293772 | Palld  | 166226 | 64215066 | 64215266 |
| 8 | 63990226 | 64381492 - | NM_001293772 | Palld  | 186991 | 64194301 | 64194501 |
| 8 | 63990226 | 64381492 - | NM_001293772 | Palld  | 321459 | 64059833 | 64060033 |
| 8 | 63990226 | 64381492 - | NM_001293772 | Palld  | 250317 | 64130975 | 64131175 |
| 8 | 63990226 | 64381492 - | NM_001293772 | Palld  | 267850 | 64113442 | 64113642 |
| 8 | 63990226 | 64381492 - | NM_001293772 | Palld  | 331907 | 64049385 | 64049585 |
| 8 | 63990226 | 64238896 - | NM_001293773 | Palld  | 45216  | 64193480 | 64193680 |
| 8 | 63990226 | 64238896 - | NM_001293773 | Palld  | 23630  | 64215066 | 64215266 |
| 8 | 63990226 | 64238896 - | NM_001293773 | Palld  | 44395  | 64194301 | 64194501 |
| 8 | 63990226 | 64238896 - | NM_001293773 | Palld  | 178863 | 64059833 | 64060033 |
| 8 | 63990226 | 64238896 - | NM_001293773 | Palld  | 107721 | 64130975 | 64131175 |
| 8 | 63990226 | 64238896 - | NM_001293773 | Palld  | 125254 | 64113442 | 64113642 |
| 8 | 63990226 | 64238896 - | NM_001293773 | Palld  | 189311 | 64049385 | 64049585 |
| 8 | 63990226 | 64069967 - | NM_001293774 | Palld  | 9934   | 64059833 | 64060033 |
| 8 | 63990226 | 64069967 - | NM_001293774 | Palld  | 20382  | 64049385 | 64049585 |
| 8 | 63993820 | 64381488 - | NM_001081390 | Palld  | 187808 | 64193480 | 64193680 |
| 8 | 63993820 | 64381488 - | NM_001081390 | Palld  | 84541  | 64296747 | 64296947 |
| 8 | 63993820 | 64381488 - | NM_001081390 | Palld  | 77804  | 64303484 | 64303684 |

|   |          |            |              |            |        |          |          |
|---|----------|------------|--------------|------------|--------|----------|----------|
| 8 | 63993820 | 64381488 - | NM_001081390 | Palld      | 166222 | 64215066 | 64215266 |
| 8 | 63993820 | 64381488 - | NM_001081390 | Palld      | 186987 | 64194301 | 64194501 |
| 8 | 63993820 | 64381488 - | NM_001081390 | Palld      | 321455 | 64059833 | 64060033 |
| 8 | 63993820 | 64381488 - | NM_001081390 | Palld      | 250313 | 64130975 | 64131175 |
| 8 | 63993820 | 64381488 - | NM_001081390 | Palld      | 267846 | 64113442 | 64113642 |
| 8 | 63993820 | 64381488 - | NM_001081390 | Palld      | 331903 | 64049385 | 64049585 |
| 8 | 67196942 | 67212376 - | NM_025436    | Msmo1      | 2192   | 67209984 | 67210184 |
| 8 | 67196942 | 67212376 - | NM_025436    | Msmo1      | -4690  | 67217066 | 67217266 |
| 8 | 67218472 | 67373823 - | NM_178633    | Klhl2      | 44376  | 67329247 | 67329447 |
| 8 | 67218472 | 67373823 - | NM_178633    | Klhl2      | 148283 | 67225340 | 67225540 |
| 8 | 67471084 | 67492936 + | NM_001163747 | Tmem192    | -5419  | 67465465 | 67465665 |
| 8 | 67471084 | 67492936 + | NM_028427    | Tmem192    | -5419  | 67465465 | 67465665 |
| 8 | 67609513 | 67653437 - | NR_033217    | BC030870   | 29971  | 67623266 | 67623466 |
| 8 | 67609513 | 67653437 - | NR_033217    | BC030870   | 2726   | 67650511 | 67650711 |
| 8 | 67609513 | 67653437 - | NR_033217    | BC030870   | 31169  | 67622068 | 67622268 |
| 8 | 70212981 | 70342195 - | NM_027626    | Psd3       | 65354  | 70276641 | 70276841 |
| 8 | 70212981 | 70434846 - | NM_030263    | Psd3       | 158005 | 70276641 | 70276841 |
| 8 | 70212981 | 70498474 - | NM_177698    | Psd3       | 221633 | 70276641 | 70276841 |
| 8 | 70800427 | 70871604 + | NM_028182    | Sh2d4a     | -9796  | 70790431 | 70790631 |
| 8 | 70800427 | 70871604 + | NM_028182    | Sh2d4a     | 68002  | 70868429 | 70868629 |
| 8 | 70880680 | 71259046 - | NM_001252623 | Csgalnact1 | 322176 | 70936670 | 70936870 |
| 8 | 70880680 | 71259046 - | NM_172753    | Csgalnact1 | 322176 | 70936670 | 70936870 |
| 8 | 71561607 | 71613122 - | NM_153054    | Slc18a1    | 11798  | 71601124 | 71601324 |
| 8 | 71561607 | 71613122 - | NM_153054    | Slc18a1    | 25278  | 71587644 | 71587844 |
| 8 | 72430968 | 72498283 - | NM_001113346 | Gatad2a    | 1043   | 72497040 | 72497240 |
| 8 | 72430968 | 72498283 - | NM_001113346 | Gatad2a    | 23624  | 72474459 | 72474659 |
| 8 | 72430968 | 72520284 - | NM_001286450 | Gatad2a    | 23044  | 72497040 | 72497240 |
| 8 | 72430968 | 72520284 - | NM_001286450 | Gatad2a    | 45625  | 72474459 | 72474659 |
| 8 | 72430968 | 72520284 - | NM_145596    | Gatad2a    | 23044  | 72497040 | 72497240 |
| 8 | 72430968 | 72520284 - | NM_145596    | Gatad2a    | 45625  | 72474459 | 72474659 |

|   |          |            |              |                  |       |          |          |
|---|----------|------------|--------------|------------------|-------|----------|----------|
| 8 | 72596823 | 72603966 + | NM_001293795 | Tm6sf2           | 1284  | 72598107 | 72598307 |
| 8 | 72596823 | 72603966 + | NM_181540    | Tm6sf2           | 1284  | 72598107 | 72598307 |
| 8 | 72607428 | 72614762 + | NM_177900    | Hapln4           | -9121 | 72598107 | 72598307 |
| 8 | 72663398 | 72691388 + | NM_001310055 | 2310045n01rik-me | 27917 | 72691315 | 72691515 |
| 8 | 72676660 | 72691388 + | NM_001045484 | Mef2b            | 14655 | 72691315 | 72691515 |
| 8 | 72696307 | 72707581 + | NM_001293797 | Tmem161a         | -4792 | 72691315 | 72691515 |
| 8 | 72696307 | 72707581 + | NM_145597    | Tmem161a         | -4792 | 72691315 | 72691515 |
| 8 | 72696307 | 72707581 + | NR_122028    | Tmem161a         | -4792 | 72691315 | 72691515 |
| 8 | 73063574 | 73116758 + | NM_007924    | Ell              | 12759 | 73076333 | 73076533 |
| 8 | 73170335 | 73183638 - | NM_023217    | Pgpep1           | 10062 | 73173376 | 73173576 |
| 8 | 73197130 | 73202652 + | NM_015816    | Lsm4             | 1652  | 73198782 | 73198982 |
| 8 | 73197130 | 73202652 + | NM_015816    | Lsm4             | 402   | 73197532 | 73197732 |
| 8 | 73282548 | 73284821 - | NM_183170    | Mpv17l2          | -2329 | 73287150 | 73287350 |
| 8 | 73282548 | 73284821 - | NM_183170    | Mpv17l2          | -3048 | 73287869 | 73288069 |
| 8 | 73286672 | 73290563 - | NM_023065    | lfi30            | 3213  | 73287150 | 73287350 |
| 8 | 73286672 | 73290563 - | NM_023065    | lfi30            | 2494  | 73287869 | 73288069 |
| 8 | 73292080 | 73300612 - | NM_008841    | Pik3r2           | -502  | 73301114 | 73301314 |
| 8 | 73300761 | 73301506 + | NR_029440    | 2010320M18Rik    | 353   | 73301114 | 73301314 |
| 8 | 73796613 | 73884612 + | NM_001142322 | Myo9b            | 33410 | 73830023 | 73830223 |
| 8 | 73796613 | 73884612 + | NM_001142323 | Myo9b            | 33410 | 73830023 | 73830223 |
| 8 | 73796613 | 73884612 + | NM_015742    | Myo9b            | 33410 | 73830023 | 73830223 |
| 8 | 74058161 | 74061337 - | NM_198095    | Bst2             | 17    | 74061120 | 74061320 |
| 8 | 74066829 | 74071926 + | NM_028617    | Mvb12a           | -5509 | 74061120 | 74061320 |
| 8 | 74116083 | 74120167 + | NM_001294269 | Pgls             | -218  | 74115665 | 74115865 |
| 8 | 74116083 | 74120167 + | NM_025396    | Pgls             | -218  | 74115665 | 74115865 |
| 8 | 74121545 | 74132049 + | NM_001166213 | Fam129c          | -5680 | 74115665 | 74115865 |
| 8 | 74150612 | 74195657 - | NM_001029873 | Unc13a           | 13039 | 74182418 | 74182618 |
| 8 | 74685099 | 74705266 + | NM_023126    | Rab8a            | -769  | 74684130 | 74684330 |
| 8 | 74685099 | 74705266 + | NM_023126    | Rab8a            | 8675  | 74693774 | 74693974 |
| 8 | 74764031 | 74781279 + | NM_007456    | Ap1m1            | -376  | 74763455 | 74763655 |

|   |          |            |              |               |        |          |          |
|---|----------|------------|--------------|---------------|--------|----------|----------|
| 8 | 75001894 | 75016514 - | NM_177766    | Slc35e1       | 2756   | 75013558 | 75013758 |
| 8 | 75001894 | 75016514 - | NM_177766    | Slc35e1       | 2002   | 75014312 | 75014512 |
| 8 | 75338498 | 75876456 - | NM_010687    | Large         | 250918 | 75625338 | 75625538 |
| 8 | 75338498 | 75876456 - | NM_010687    | Large         | 190753 | 75685503 | 75685703 |
| 8 | 75338498 | 75876456 - | NM_010687    | Large         | 251543 | 75624713 | 75624913 |
| 8 | 77397073 | 77417406 + | NM_001294278 | Isx           | -412   | 77396461 | 77396661 |
| 8 | 77397073 | 77417406 + | NM_001294278 | Isx           | 1765   | 77398838 | 77399038 |
| 8 | 77397073 | 77417406 + | NM_027837    | Isx           | -412   | 77396461 | 77396661 |
| 8 | 77397073 | 77417406 + | NM_027837    | Isx           | 1765   | 77398838 | 77399038 |
| 8 | 79272986 | 79424073 - | NR_028579    | Gm10649       | 105971 | 79317902 | 79318102 |
| 8 | 79426407 | 79767539 + | NM_001083906 | Nr3c2         | 214419 | 79640826 | 79641026 |
| 8 | 79426407 | 79767539 + | NM_001083906 | Nr3c2         | 142498 | 79568905 | 79569105 |
| 8 | 79426407 | 79767539 + | NM_001083906 | Nr3c2         | 176777 | 79603184 | 79603384 |
| 8 | 79426407 | 79767539 + | NM_001083906 | Nr3c2         | 153101 | 79579508 | 79579708 |
| 8 | 79426407 | 79767539 + | NM_001083906 | Nr3c2         | 25857  | 79452264 | 79452464 |
| 8 | 79426407 | 79767539 + | NM_001083906 | Nr3c2         | 11118  | 79437525 | 79437725 |
| 8 | 79774265 | 80041807 - | NM_030113    | Arhgap10      | 205186 | 79836421 | 79836621 |
| 8 | 81552336 | 81717666 + | NM_001294279 | Zfp827        | 52017  | 81604353 | 81604553 |
| 8 | 81552336 | 81717666 + | NM_001294279 | Zfp827        | 110678 | 81663014 | 81663214 |
| 8 | 81552336 | 81717666 + | NM_001294279 | Zfp827        | 103434 | 81655770 | 81655970 |
| 8 | 81552336 | 81717666 + | NM_178267    | Zfp827        | 52017  | 81604353 | 81604553 |
| 8 | 81552336 | 81717666 + | NM_178267    | Zfp827        | 110678 | 81663014 | 81663214 |
| 8 | 81552336 | 81717666 + | NM_178267    | Zfp827        | 103434 | 81655770 | 81655970 |
| 8 | 81734329 | 81772483 - | NM_026315    | 1700011L22Rik | 5263   | 81767020 | 81767220 |
| 8 | 81790323 | 81818856 - | NM_133823    | Mmaa          | 22291  | 81796365 | 81796565 |
| 8 | 81862298 | 81923368 - | NM_008539    | Smad1         | 37972  | 81885196 | 81885396 |
| 8 | 81862298 | 81923368 - | NM_008539    | Smad1         | 23744  | 81899424 | 81899624 |
| 8 | 81862298 | 81923368 - | NM_008539    | Smad1         | 28333  | 81894835 | 81895035 |
| 8 | 83288330 | 83404419 - | NM_001301298 | Gab1          | 101322 | 83302897 | 83303097 |
| 8 | 83288330 | 83404419 - | NM_001301298 | Gab1          | 22306  | 83381913 | 83382113 |



|   |          |            |              |        |        |          |          |
|---|----------|------------|--------------|--------|--------|----------|----------|
| 8 | 83288330 | 83404419 - | NM_001301298 | Gab1   | 61174  | 83343045 | 83343245 |
| 8 | 83288330 | 83404419 - | NM_001301298 | Gab1   | 66413  | 83337806 | 83338006 |
| 8 | 83288333 | 83404379 - | NM_021356    | Gab1   | 101282 | 83302897 | 83303097 |
| 8 | 83288333 | 83404379 - | NM_021356    | Gab1   | 22266  | 83381913 | 83382113 |
| 8 | 83288333 | 83404379 - | NM_021356    | Gab1   | 61134  | 83343045 | 83343245 |
| 8 | 83288333 | 83404379 - | NM_021356    | Gab1   | 66373  | 83337806 | 83338006 |
| 8 | 83504632 | 83538806 - | NM_027554    | Usp38  | 3294   | 83535312 | 83535512 |
| 8 | 83504632 | 83538806 - | NM_027554    | Usp38  | 31672  | 83506934 | 83507134 |
| 8 | 83866461 | 84646470 + | NM_001024617 | Inpp4b | 498133 | 84364594 | 84364794 |
| 8 | 83866461 | 84646470 + | NM_001297591 | Inpp4b | 498133 | 84364594 | 84364794 |
| 8 | 83866461 | 84651817 + | NM_001297593 | Inpp4b | 498133 | 84364594 | 84364794 |
| 8 | 83866461 | 84651817 + | NM_001297596 | Inpp4b | 498133 | 84364594 | 84364794 |
| 8 | 84855523 | 84926486 - | NM_001254747 | Il15   | 8268   | 84918018 | 84918218 |
| 8 | 84855523 | 84926486 - | NM_001254747 | Il15   | 884    | 84925402 | 84925602 |
| 8 | 84855523 | 84926486 - | NM_001254747 | Il15   | 17848  | 84908438 | 84908638 |
| 8 | 84855523 | 84926486 - | NM_008357    | Il15   | 8268   | 84918018 | 84918218 |
| 8 | 84855523 | 84926486 - | NM_008357    | Il15   | 884    | 84925402 | 84925602 |
| 8 | 84855523 | 84926486 - | NM_008357    | Il15   | 17848  | 84908438 | 84908638 |
| 8 | 85689251 | 85796840 + | NM_001111304 | Tbc1d9 | 13247  | 85702498 | 85702698 |
| 8 | 85689251 | 85796840 + | NM_001111304 | Tbc1d9 | 49720  | 85738971 | 85739171 |
| 8 | 85689251 | 85796840 + | NM_027758    | Tbc1d9 | 13247  | 85702498 | 85702698 |
| 8 | 85689251 | 85796840 + | NM_027758    | Tbc1d9 | 49720  | 85738971 | 85739171 |
| 8 | 85836531 | 85856386 - | NM_001170691 | Elmod2 | 6769   | 85849417 | 85849617 |
| 8 | 85836531 | 85856386 - | NM_178736    | Elmod2 | 6769   | 85849417 | 85849617 |
| 8 | 85872371 | 85903302 + | NM_026233    | Mgat4d | 22416  | 85894787 | 85894987 |
| 8 | 85958391 | 85982296 - | NM_001039137 | Scoc   | -18    | 85982314 | 85982514 |
| 8 | 86193661 | 86217961 - | NM_001199593 | Pkn1   | -2297  | 86220258 | 86220458 |
| 8 | 86193661 | 86223079 - | NM_177262    | Pkn1   | 2621   | 86220258 | 86220458 |
| 8 | 86239076 | 86247251 + | NM_197982    | Ddx39  | 1527   | 86240603 | 86240803 |
| 8 | 86423997 | 86465854 + | NM_181039    | Adgrl1 | -4010  | 86419787 | 86419987 |

|   |          |            |              |               |        |          |          |
|---|----------|------------|--------------|---------------|--------|----------|----------|
| 8 | 86479593 | 86494095 + | NM_024184    | Asf1b         | 219    | 86479812 | 86480012 |
| 8 | 86554185 | 86566475 - | NM_016671    | Il27ra        | -2598  | 86569073 | 86569273 |
| 8 | 86566966 | 86568879 - | NM_173184    | Rln3          | -194   | 86569073 | 86569273 |
| 8 | 86620971 | 86628662 - | NM_172502    | Dcaf15        | 950    | 86627512 | 86627712 |
| 8 | 87194378 | 87211762 - | NM_025788    | Nacc1         | -825   | 87212587 | 87212787 |
| 8 | 87213146 | 87223708 + | NM_001164559 | Trmt1         | -359   | 87212587 | 87212787 |
| 8 | 87213146 | 87223708 + | NM_001164560 | Trmt1         | -359   | 87212587 | 87212787 |
| 8 | 87213146 | 87223708 + | NM_198020    | Trmt1         | -359   | 87212587 | 87212787 |
| 8 | 87598934 | 87604646 - | NM_026399    | Wdr83         | -5831  | 87610477 | 87610677 |
| 8 | 87607168 | 87622639 + | NM_010764    | Man2b1        | 3309   | 87610477 | 87610677 |
| 8 | 87633066 | 87646995 - | NM_001037745 | Zfp791        | -9332  | 87656327 | 87656527 |
| 8 | 87784291 | 87823397 - | NM_022997    | Vps35         | -702   | 87824099 | 87824299 |
| 8 | 87823531 | 87832179 + | NM_001163791 | Orc6          | 568    | 87824099 | 87824299 |
| 8 | 87823531 | 87832179 + | NM_019716    | Orc6          | 568    | 87824099 | 87824299 |
| 8 | 87823531 | 87832179 + | NR_028268    | Orc6          | 568    | 87824099 | 87824299 |
| 8 | 87848828 | 87904941 - | NM_001297612 | Mylk3         | 1294   | 87903447 | 87903647 |
| 8 | 87932658 | 87956741 - | NM_025722    | 4921524J17Rik | -2950  | 87959691 | 87959891 |
| 8 | 87932658 | 87956741 - | NR_033144    | 4921524J17Rik | -2950  | 87959691 | 87959891 |
| 8 | 88241456 | 88364849 - | NM_028007    | Itfg1         | 44237  | 88320412 | 88320612 |
| 8 | 88364901 | 88584542 + | NM_199446    | Phkb          | 206583 | 88571484 | 88571684 |
| 8 | 89147942 | 89240536 + | NM_025827    | Lonp2         | 452    | 89148394 | 89148594 |
| 8 | 90642658 | 90659097 + | NM_029074    | Cnep1r1       | 419    | 90643077 | 90643277 |
| 8 | 90642658 | 90659097 + | NM_029074    | Cnep1r1       | -898   | 90641560 | 90641760 |
| 8 | 90723112 | 90783622 + | NM_001164497 | Papd5         | 25959  | 90749071 | 90749271 |
| 8 | 90723112 | 90783622 + | NM_001164497 | Papd5         | 15566  | 90738678 | 90738878 |
| 8 | 90723112 | 90783622 + | NM_001164498 | Papd5         | 25959  | 90749071 | 90749271 |
| 8 | 90723112 | 90783622 + | NM_001164498 | Papd5         | 15566  | 90738678 | 90738878 |
| 8 | 90723112 | 90783622 + | NM_001164499 | Papd5         | 25959  | 90749071 | 90749271 |
| 8 | 90723112 | 90783622 + | NM_001164499 | Papd5         | 15566  | 90738678 | 90738878 |
| 8 | 91150727 | 91160028 - | NM_027840    | Snx20         | 933    | 91158895 | 91159095 |

|   |          |            |              |         |        |          |          |
|---|----------|------------|--------------|---------|--------|----------|----------|
| 8 | 91171246 | 91212374 + | NM_145857    | Nod2    | 26390  | 91197636 | 91197836 |
| 8 | 92771011 | 92872152 - | NM_172913    | Tox3    | 48278  | 92823674 | 92823874 |
| 8 | 93352734 | 93578408 + | NM_177224    | Chd9    | 69866  | 93422600 | 93422800 |
| 8 | 93352734 | 93578408 + | NM_177224    | Chd9    | 81170  | 93433904 | 93434104 |
| 8 | 93352734 | 93578408 + | NM_177224    | Chd9    | 52285  | 93405019 | 93405219 |
| 8 | 93352734 | 93578408 + | NM_177224    | Chd9    | 2815   | 93355549 | 93355749 |
| 8 | 93837424 | 94192333 + | NM_011936    | Fto     | 67750  | 93905174 | 93905374 |
| 8 | 95544114 | 95572092 - | NM_001013764 | Ces1a   | -7158  | 95579250 | 95579450 |
| 8 | 95580626 | 95603917 - | NM_001081372 | Ces1b   | 16285  | 95587432 | 95587632 |
| 8 | 95780135 | 95803636 - | NM_144930    | Ces1f   | 3088   | 95800348 | 95800548 |
| 8 | 95826268 | 95861109 - | NM_021456    | Ces1g   | 4198   | 95856711 | 95856911 |
| 8 | 96334738 | 96484595 + | NM_001113384 | Gnao1   | 122262 | 96457000 | 96457200 |
| 8 | 96334738 | 96484595 + | NM_001113384 | Gnao1   | 101191 | 96435929 | 96436129 |
| 8 | 96334738 | 96493289 + | NM_010308    | Gnao1   | 122262 | 96457000 | 96457200 |
| 8 | 96334738 | 96493289 + | NM_010308    | Gnao1   | 101191 | 96435929 | 96436129 |
| 8 | 96495488 | 96536541 - | NM_011787    | Amfr    | 883    | 96535458 | 96535658 |
| 8 | 96853108 | 96890122 + | NM_001205311 | Slc12a3 | 33722  | 96886830 | 96887030 |
| 8 | 96853108 | 96890122 + | NM_001205311 | Slc12a3 | 8358   | 96861466 | 96861666 |
| 8 | 96853108 | 96890122 + | NM_019415    | Slc12a3 | 33722  | 96886830 | 96887030 |
| 8 | 96853108 | 96890122 + | NM_019415    | Slc12a3 | 8358   | 96861466 | 96861666 |
| 8 | 96910400 | 96919259 + | NM_022331    | Herpud1 | 5868   | 96916268 | 96916468 |
| 8 | 96996663 | 97051173 + | NM_001033207 | Nlrc5   | 18351  | 97015014 | 97015214 |
| 8 | 97190500 | 97198358 + | NM_024191    | Arl2bp  | -5777  | 97184523 | 97184723 |
| 8 | 97190991 | 97198358 + | NM_024269    | Arl2bp  | -6268  | 97184523 | 97184723 |
| 8 | 97198795 | 97220143 - | NM_026385    | Plip    | -6586  | 97226729 | 97226929 |
| 8 | 97198795 | 97220143 - | NM_026385    | Plip    | 13039  | 97206904 | 97207104 |
| 8 | 97296080 | 97306327 + | NM_009142    | Cx3cl1  | 9112   | 97305192 | 97305392 |
| 8 | 97296080 | 97306327 + | NM_009142    | Cx3cl1  | -1105  | 97294775 | 97294975 |
| 8 | 97387728 | 97400213 - | NM_053246    | Dok4    | 1864   | 97398149 | 97398349 |
| 8 | 97387728 | 97400213 - | NM_053246    | Dok4    | 614    | 97399399 | 97399599 |

|   |           |             |              |        |       |           |           |
|---|-----------|-------------|--------------|--------|-------|-----------|-----------|
| 8 | 97623728  | 97666441 -  | NM_001145831 | Kifc3  | -3571 | 97670012  | 97670212  |
| 8 | 97623728  | 97666441 -  | NM_010631    | Kifc3  | -3571 | 97670012  | 97670212  |
| 8 | 97835498  | 97845230 +  | NM_028532    | Tepp   | 9053  | 97844551  | 97844751  |
| 8 | 97835498  | 97845230 +  | NM_199455    | Tepp   | 9053  | 97844551  | 97844751  |
| 8 | 97850036  | 97855851 -  | NM_024467    | Zfp319 | -8851 | 97864702  | 97864902  |
| 8 | 97856184  | 97871414 +  | NM_133954    | Usb1   | 8518  | 97864702  | 97864902  |
| 8 | 97876237  | 97898194 +  | NM_008609    | Mmp15  | 6556  | 97882793  | 97882993  |
| 8 | 97876237  | 97898194 +  | NM_008609    | Mmp15  | 10905 | 97887142  | 97887342  |
| 8 | 98243351  | 98331363 -  | NM_001205226 | Cnot1  | 11510 | 98319653  | 98319853  |
| 8 | 98243351  | 98331363 -  | NM_153164    | Cnot1  | 11510 | 98319653  | 98319853  |
| 8 | 98243351  | 98331363 -  | NM_178078    | Cnot1  | 11510 | 98319653  | 98319853  |
| 8 | 106750591 | 106772459 - | NM_021028    | Tk2    | 6167  | 106766092 | 106766292 |
| 8 | 106750591 | 106772459 - | NR_045642    | Tk2    | 6167  | 106766092 | 106766292 |
| 8 | 106774761 | 106788837 + | NM_001037841 | Cklf   | -8469 | 106766092 | 106766292 |
| 8 | 106774761 | 106787348 + | NM_001286383 | Cklf   | -8469 | 106766092 | 106766292 |
| 8 | 106774761 | 106787348 + | NM_029295    | Cklf   | -8469 | 106766092 | 106766292 |
| 8 | 106774761 | 106787348 + | NR_104433    | Cklf   | -8469 | 106766092 | 106766292 |
| 8 | 106872093 | 106919708 - | NM_153582    | Cmtm4  | 5276  | 106914232 | 106914432 |
| 8 | 106970619 | 107033788 - | NM_180958    | Ccdc79 | 16698 | 107016890 | 107017090 |
| 8 | 107115368 | 107120750 + | NM_001024606 | Pdp2   | 4784  | 107120152 | 107120352 |
| 8 | 107115368 | 107120750 + | NM_001024606 | Pdp2   | -311  | 107114857 | 107115057 |
| 8 | 107125815 | 107148297 - | NM_001252628 | Cdh16  | -6689 | 107154986 | 107155186 |
| 8 | 107138039 | 107148297 - | NM_001252627 | Cdh16  | -6689 | 107154986 | 107155186 |
| 8 | 107138039 | 107148297 - | NM_007663    | Cdh16  | -6689 | 107154986 | 107155186 |
| 8 | 107151966 | 107155222 - | NM_019662    | Rrad   | -9683 | 107164905 | 107165105 |
| 8 | 107151966 | 107155222 - | NM_019662    | Rrad   | 36    | 107154986 | 107155186 |
| 8 | 107163739 | 107165629 - | NM_026753    | Fam96b | 524   | 107164905 | 107165105 |
| 8 | 107257903 | 107265535 + | NM_001190330 | Ces2a  | 0     | 107257726 | 107257926 |
| 8 | 107257903 | 107265535 + | NM_001190330 | Ces2a  | -1677 | 107256026 | 107256226 |
| 8 | 107257903 | 107265535 + | NM_133960    | Ces2a  | 0     | 107257726 | 107257926 |

|   |           |             |              |               |       |           |           |
|---|-----------|-------------|--------------|---------------|-------|-----------|-----------|
| 8 | 107257903 | 107265535 + | NM_133960    | Ces2a         | -1677 | 107256026 | 107256226 |
| 8 | 107355544 | 107362553 + | NM_198171    | Ces2b         | -3184 | 107352160 | 107352360 |
| 8 | 107450160 | 107458573 + | NM_001163756 | Ces2e         | 1090  | 107451250 | 107451450 |
| 8 | 107450160 | 107458573 + | NM_172759    | Ces2e         | 1090  | 107451250 | 107451450 |
| 8 | 107524753 | 107544311 + | NM_001272045 | Ces2h         | -6263 | 107518290 | 107518490 |
| 8 | 107607655 | 107617492 + | NM_001159415 | Ces3b         | 0     | 107607645 | 107607845 |
| 8 | 107607655 | 107617492 + | NM_144511    | Ces3b         | 0     | 107607645 | 107607845 |
| 8 | 107776538 | 107779054 - | NM_001271915 | B3gnt9        | -6634 | 107785688 | 107785888 |
| 8 | 107776538 | 107779054 - | NM_178879    | B3gnt9        | -6634 | 107785688 | 107785888 |
| 8 | 107782475 | 107788495 - | NM_001033161 | Tradd         | 2607  | 107785688 | 107785888 |
| 8 | 107788548 | 107793227 + | NM_015821    | Fbxl8         | -2660 | 107785688 | 107785888 |
| 8 | 107793701 | 107799746 + | NM_001256042 | Hsf4          | -7813 | 107785688 | 107785888 |
| 8 | 107793701 | 107799746 + | NM_001256044 | Hsf4          | -7813 | 107785688 | 107785888 |
| 8 | 107793701 | 107799746 + | NM_011939    | Hsf4          | -7813 | 107785688 | 107785888 |
| 8 | 107793701 | 107799746 + | NR_045689    | Hsf4          | -7813 | 107785688 | 107785888 |
| 8 | 107804309 | 107813429 - | NM_001166394 | 4931428F04Rik | 278   | 107812951 | 107813151 |
| 8 | 107804309 | 107813429 - | NM_028888    | 4931428F04Rik | 278   | 107812951 | 107813151 |
| 8 | 107821563 | 107829271 + | NM_148952    | E2f4          | -8412 | 107812951 | 107813151 |
| 8 | 107991392 | 107995323 - | NM_026481    | Tppp3         | -207  | 107995530 | 107995730 |
| 8 | 108048370 | 108089941 - | NM_013477    | Atp6v0d1      | 5452  | 108084289 | 108084489 |
| 8 | 108160438 | 108206823 + | NM_181322    | Ctcf          | 38006 | 108198444 | 108198644 |
| 8 | 108240013 | 108282508 - | NM_027469    | Gfod2         | 3654  | 108278654 | 108278854 |
| 8 | 108351644 | 108368577 + | NM_024445    | Tsnaxip1      | 11586 | 108363230 | 108363430 |
| 8 | 108535378 | 108577741 + | NM_001301176 | Dus2          | 36912 | 108572290 | 108572490 |
| 8 | 108535378 | 108577741 + | NM_025518    | Dus2          | 36912 | 108572290 | 108572490 |
| 8 | 108655083 | 108660875 - | NM_176838    | Esrp2         | -1091 | 108661966 | 108662166 |
| 8 | 108659300 | 108662623 + | NR_040344    | 1810019D21Rik | 2666  | 108661966 | 108662166 |
| 8 | 108659300 | 108662623 + | NR_040345    | 1810019D21Rik | 2666  | 108661966 | 108662166 |
| 8 | 108659300 | 108662623 + | NR_040346    | 1810019D21Rik | 2666  | 108661966 | 108662166 |
| 8 | 108674299 | 108688616 + | NM_133792    | Pla2g15       | -80   | 108674019 | 108674219 |

|   |           |             |             |               |        |           |           |
|---|-----------|-------------|-------------|---------------|--------|-----------|-----------|
| 8 | 108692775 | 108722605 + | NM_178798   | Slc7a6        | -2591  | 108689984 | 108690184 |
| 8 | 108776448 | 108861889 - | NM_021491   | Smpd3         | 48368  | 108813321 | 108813521 |
| 8 | 108776448 | 108861889 - | NM_021491   | Smpd3         | 25990  | 108835699 | 108835899 |
| 8 | 108776448 | 108861889 - | NM_021491   | Smpd3         | 41498  | 108820191 | 108820391 |
| 8 | 108776448 | 108861889 - | NM_021491   | Smpd3         | 58118  | 108803571 | 108803771 |
| 8 | 108776448 | 108861889 - | NM_021491   | Smpd3         | 68676  | 108793013 | 108793213 |
| 8 | 108806129 | 108859655 + | NR_126090   | 4930506A18Rik | 7192   | 108813321 | 108813521 |
| 8 | 108806129 | 108859655 + | NR_126090   | 4930506A18Rik | 29570  | 108835699 | 108835899 |
| 8 | 108806129 | 108859655 + | NR_126090   | 4930506A18Rik | 14062  | 108820191 | 108820391 |
| 8 | 108806129 | 108859655 + | NR_126090   | 4930506A18Rik | -2358  | 108803571 | 108803771 |
| 8 | 108806129 | 108859655 + | NR_126091   | 4930506A18Rik | 7192   | 108813321 | 108813521 |
| 8 | 108806129 | 108859655 + | NR_126091   | 4930506A18Rik | 29570  | 108835699 | 108835899 |
| 8 | 108806129 | 108859655 + | NR_126091   | 4930506A18Rik | 14062  | 108820191 | 108820391 |
| 8 | 108806129 | 108859655 + | NR_126091   | 4930506A18Rik | -2358  | 108803571 | 108803771 |
| 8 | 109111043 | 109118721 + | NR_045470   | 1110028F18Rik | 1718   | 109112761 | 109112961 |
| 8 | 109111043 | 109118721 + | NR_045470   | 1110028F18Rik | -9786  | 109101057 | 109101257 |
| 8 | 109127268 | 109194147 + | NM_009864   | Cdh1          | 5289   | 109132557 | 109132757 |
| 8 | 109127268 | 109194147 + | NM_009864   | Cdh1          | 19864  | 109147132 | 109147332 |
| 8 | 109127268 | 109194147 + | NM_009864   | Cdh1          | 20458  | 109147726 | 109147926 |
| 8 | 109127268 | 109194147 + | NM_009864   | Cdh1          | 17251  | 109144519 | 109144719 |
| 8 | 109127268 | 109194147 + | NM_009864   | Cdh1          | 6279   | 109133547 | 109133747 |
| 8 | 109127268 | 109194147 + | NM_009864   | Cdh1          | -297   | 109126771 | 109126971 |
| 8 | 109127268 | 109194147 + | NM_009864   | Cdh1          | -2785  | 109124283 | 109124483 |
| 8 | 109674561 | 109711371 + | NM_025558   | Cyb5b         | 0      | 109674422 | 109674622 |
| 8 | 109674561 | 109711371 + | NM_025558   | Cyb5b         | 13676  | 109688237 | 109688437 |
| 8 | 109674561 | 109711371 + | NM_025558   | Cyb5b         | 7280   | 109681841 | 109682041 |
| 8 | 109674561 | 109711371 + | NM_025558   | Cyb5b         | 2540   | 109677101 | 109677301 |
| 8 | 109674561 | 109711371 + | NM_025558   | Cyb5b         | -7891  | 109666470 | 109666670 |
| 8 | 109780064 | 109983275 + | NR_039557.3 | Mir5098       | 181038 | 109961102 | 109961302 |
| 8 | 109780064 | 109983275 + | NR_039557.3 | Mir5098       | 12805  | 109792869 | 109793069 |

|   |           |             |              |               |        |           |           |
|---|-----------|-------------|--------------|---------------|--------|-----------|-----------|
| 8 | 109960298 | 110082496 + | NM_025830    | Wwp2          | 804    | 109961102 | 109961302 |
| 8 | 111238544 | 111485537 + | NM_007496    | Zfhx3         | 213916 | 111452460 | 111452660 |
| 8 | 111238544 | 111485537 + | NM_007496    | Zfhx3         | 44113  | 111282657 | 111282857 |
| 8 | 111460760 | 111460839 + | NR_037295    | Mir3108       | -8100  | 111452460 | 111452660 |
| 8 | 112302483 | 112388110 + | NM_001301211 | Ap1g1         | 76950  | 112379433 | 112379633 |
| 8 | 112302483 | 112388110 + | NM_009677    | Ap1g1         | 76950  | 112379433 | 112379633 |
| 8 | 112392503 | 112468572 + | NM_001122594 | Phlpp2        | 55560  | 112448063 | 112448263 |
| 8 | 112392503 | 112468572 + | NM_001122594 | Phlpp2        | 75184  | 112467687 | 112467887 |
| 8 | 112392503 | 112468572 + | NM_001122594 | Phlpp2        | 60374  | 112452877 | 112453077 |
| 8 | 112392503 | 112468572 + | NM_001122594 | Phlpp2        | -2347  | 112389956 | 112390156 |
| 8 | 112392503 | 112468572 + | NM_001122594 | Phlpp2        | 36555  | 112429058 | 112429258 |
| 8 | 112392503 | 112468572 + | NM_001122594 | Phlpp2        | 43211  | 112435714 | 112435914 |
| 8 | 112392503 | 112468572 + | NM_001122594 | Phlpp2        | 42133  | 112434636 | 112434836 |
| 8 | 112392503 | 112468572 + | NM_001122594 | Phlpp2        | 15999  | 112408502 | 112408702 |
| 8 | 112392503 | 112468572 + | NM_001122594 | Phlpp2        | 15597  | 112408100 | 112408300 |
| 8 | 112392503 | 112468572 + | NM_001122594 | Phlpp2        | -3448  | 112388855 | 112389055 |
| 8 | 112552975 | 112563235 - | NM_011998    | Chst4         | -338   | 112563573 | 112563773 |
| 8 | 112571332 | 112581077 + | NR_131069    | 8030455M16Rik | -7559  | 112563573 | 112563773 |
| 8 | 112571332 | 112581077 + | NR_131069    | 8030455M16Rik | 3823   | 112575155 | 112575355 |
| 8 | 112603634 | 112616653 + | NM_175480    | Zfp612        | -7811  | 112595623 | 112595823 |
| 8 | 112790877 | 113134154 + | NM_172916    | Hydin         | 82521  | 112873398 | 112873598 |
| 8 | 113142538 | 113244300 + | NM_146216    | Vac14         | -373   | 113141965 | 113142165 |
| 8 | 113265729 | 113329825 - | NM_001135100 | Il34          | 15146  | 113314479 | 113314679 |
| 8 | 113265729 | 113329825 - | NM_029646    | Il34          | 15146  | 113314479 | 113314679 |
| 8 | 113443765 | 113496398 + | NM_009179    | St3gal2       | 45832  | 113489597 | 113489797 |
| 8 | 113498891 | 113521724 - | NM_007916    | Ddx19a        | 0      | 113521721 | 113521921 |
| 8 | 113527086 | 113555652 - | NM_001190786 | Ddx19b        | -5567  | 113561219 | 113561419 |
| 8 | 113527086 | 113555652 - | NM_001190786 | Ddx19b        | 1613   | 113553839 | 113554039 |
| 8 | 113527086 | 113551671 - | NM_001190800 | Ddx19b        | -9548  | 113561219 | 113561419 |
| 8 | 113527086 | 113551671 - | NM_001190800 | Ddx19b        | -2168  | 113553839 | 113554039 |

|   |           |             |              |          |       |           |           |
|---|-----------|-------------|--------------|----------|-------|-----------|-----------|
| 8 | 113527086 | 113551671 - | NM_172284    | Ddx19b   | -9548 | 113561219 | 113561419 |
| 8 | 113527086 | 113551671 - | NM_172284    | Ddx19b   | -2168 | 113553839 | 113554039 |
| 8 | 113557742 | 113579470 + | NM_146217    | Aars     | 3477  | 113561219 | 113561419 |
| 8 | 113557742 | 113579470 + | NM_146217    | Aars     | -3703 | 113553839 | 113554039 |
| 8 | 113681458 | 113783103 - | NM_009149    | Glg1     | 12626 | 113770277 | 113770477 |
| 8 | 113974100 | 113974223 + | NR_105819    | Mir1957b | -4339 | 113969561 | 113969761 |
| 8 | 114150171 | 114154223 - | NM_027570    | Ldhd     | -7532 | 114161755 | 114161955 |
| 8 | 114167343 | 114194909 + | NM_001037665 | Zfp1     | -5388 | 114161755 | 114161955 |
| 8 | 114167343 | 114194909 + | NM_001037665 | Zfp1     | 19146 | 114186489 | 114186689 |
| 8 | 114167343 | 114194909 + | NM_001037665 | Zfp1     | -763  | 114166380 | 114166580 |
| 8 | 114167343 | 114194912 + | NM_011742    | Zfp1     | -5388 | 114161755 | 114161955 |
| 8 | 114167343 | 114194912 + | NM_011742    | Zfp1     | 19146 | 114186489 | 114186689 |
| 8 | 114167343 | 114194912 + | NM_011742    | Zfp1     | -763  | 114166380 | 114166580 |
| 8 | 114234375 | 114267750 - | NM_009954    | Bcar1    | -3997 | 114271747 | 114271947 |
| 8 | 114388798 | 114400576 - | NM_025781    | Tmem170  | 1164  | 114399212 | 114399412 |
| 8 | 116159486 | 116169093 + | NM_001048143 | Mon1b    | 215   | 116159701 | 116159901 |
| 8 | 116159699 | 116169093 + | NM_173015    | Mon1b    | 2     | 116159701 | 116159901 |
| 8 | 116167113 | 116179434 + | NM_001048145 | Syce1l   | -7212 | 116159701 | 116159901 |
| 8 | 116167113 | 116179434 + | NM_001286494 | Syce1l   | -7212 | 116159701 | 116159901 |
| 8 | 116167113 | 116179434 + | NM_029139    | Syce1l   | -7212 | 116159701 | 116159901 |
| 8 | 116657474 | 116676213 + | NM_001290180 | Nudt7    | 10502 | 116667976 | 116668176 |
| 8 | 116657474 | 116676213 + | NM_001290180 | Nudt7    | 8755  | 116666229 | 116666429 |
| 8 | 116657474 | 116676213 + | NM_001290181 | Nudt7    | 10502 | 116667976 | 116668176 |
| 8 | 116657474 | 116676213 + | NM_001290181 | Nudt7    | 8755  | 116666229 | 116666429 |
| 8 | 116657474 | 116672289 + | NM_001290182 | Nudt7    | 10502 | 116667976 | 116668176 |
| 8 | 116657474 | 116672289 + | NM_001290182 | Nudt7    | 8755  | 116666229 | 116666429 |
| 8 | 116657474 | 116676213 + | NM_024437    | Nudt7    | 10502 | 116667976 | 116668176 |
| 8 | 116657474 | 116676213 + | NM_024437    | Nudt7    | 8755  | 116666229 | 116666429 |
| 8 | 116657474 | 116676213 + | NM_024446    | Nudt7    | 10502 | 116667976 | 116668176 |
| 8 | 116657474 | 116676213 + | NM_024446    | Nudt7    | 8755  | 116666229 | 116666429 |



|   |           |             |              |          |        |           |           |
|---|-----------|-------------|--------------|----------|--------|-----------|-----------|
| 8 | 116963552 | 117876613 + | NM_019573    | Wwox     | 710893 | 117674445 | 117674645 |
| 8 | 116963552 | 117876613 + | NM_019573    | Wwox     | 721191 | 117684743 | 117684943 |
| 8 | 116963552 | 117876613 + | NM_019573    | Wwox     | 489992 | 117453544 | 117453744 |
| 8 | 116963552 | 117876613 + | NM_019573    | Wwox     | 345832 | 117309384 | 117309584 |
| 8 | 119519579 | 119606350 - | NM_029686    | Pkd1l2   | -7439  | 119613789 | 119613989 |
| 8 | 119519579 | 119606350 - | NM_029686    | Pkd1l2   | 3782   | 119602368 | 119602568 |
| 8 | 119619765 | 119657621 + | NM_001163028 | Bco1     | 1110   | 119620875 | 119621075 |
| 8 | 119619765 | 119657621 + | NM_001163028 | Bco1     | 19932  | 119639697 | 119639897 |
| 8 | 119619765 | 119657621 + | NM_001163028 | Bco1     | -5776  | 119613789 | 119613989 |
| 8 | 119619765 | 119657621 + | NM_021486    | Bco1     | 1110   | 119620875 | 119621075 |
| 8 | 119619765 | 119657621 + | NM_021486    | Bco1     | 19932  | 119639697 | 119639897 |
| 8 | 119619765 | 119657621 + | NM_021486    | Bco1     | -5776  | 119613789 | 119613989 |
| 8 | 119682035 | 119729087 + | NM_001081151 | Gan      | -1083  | 119680752 | 119680952 |
| 8 | 119682035 | 119729087 + | NM_001081151 | Gan      | -3313  | 119678522 | 119678722 |
| 8 | 119780919 | 119985406 + | NM_001163262 | Cmip     | 51115  | 119832034 | 119832234 |
| 8 | 119780919 | 119985406 + | NM_001163262 | Cmip     | 70210  | 119851129 | 119851329 |
| 8 | 119780919 | 119985406 + | NM_001163262 | Cmip     | 66043  | 119846962 | 119847162 |
| 8 | 119780919 | 119985406 + | NM_001163262 | Cmip     | 6577   | 119787496 | 119787696 |
| 8 | 120022191 | 120159043 + | NM_172285    | Plcg2    | 3898   | 120026089 | 120026289 |
| 8 | 120022191 | 120159043 + | NM_172285    | Plcg2    | 127532 | 120149723 | 120149923 |
| 8 | 120022191 | 120159043 + | NM_172285    | Plcg2    | 95880  | 120118071 | 120118271 |
| 8 | 120022191 | 120159043 + | NM_172285    | Plcg2    | 8080   | 120030271 | 120030471 |
| 8 | 120225846 | 120282930 + | NM_008290    | Hsd17b2  | 12799  | 120238645 | 120238845 |
| 8 | 120225846 | 120282930 + | NM_008290    | Hsd17b2  | -894   | 120224752 | 120224952 |
| 8 | 120225846 | 120282930 + | NM_008290    | Hsd17b2  | -5963  | 120219683 | 120219883 |
| 8 | 120315545 | 120325830 - | NM_026758    | Mphosph6 | 0      | 120325679 | 120325879 |
| 8 | 121961062 | 121970157 + | NM_027950    | Osgin1   | 3875   | 121964937 | 121965137 |
| 8 | 121961062 | 121970157 + | NM_027950    | Osgin1   | -2370  | 121958492 | 121958692 |
| 8 | 121970619 | 121996536 + | NM_054095    | Necab2   | -5482  | 121964937 | 121965137 |
| 8 | 122003503 | 122025599 - | NM_001009950 | Slc38a8  | 13070  | 122012329 | 122012529 |

|   |           |             |              |        |       |           |           |
|---|-----------|-------------|--------------|--------|-------|-----------|-----------|
| 8 | 122032052 | 122082662 - | NM_001167910 | Mbtps1 | 27587 | 122054875 | 122055075 |
| 8 | 122032052 | 122082662 - | NM_001167910 | Mbtps1 | 2128  | 122080334 | 122080534 |
| 8 | 122032052 | 122082662 - | NM_001167910 | Mbtps1 | 26972 | 122055490 | 122055690 |
| 8 | 122032052 | 122082662 - | NM_001167910 | Mbtps1 | 29668 | 122052794 | 122052994 |
| 8 | 122032052 | 122082662 - | NM_019709    | Mbtps1 | 27587 | 122054875 | 122055075 |
| 8 | 122032052 | 122082662 - | NM_019709    | Mbtps1 | 2128  | 122080334 | 122080534 |
| 8 | 122032052 | 122082662 - | NM_019709    | Mbtps1 | 26972 | 122055490 | 122055690 |
| 8 | 122032052 | 122082662 - | NM_019709    | Mbtps1 | 29668 | 122052794 | 122052994 |
| 8 | 122085878 | 122099101 - | NM_175185    | Hsdl1  | -2918 | 122102019 | 122102219 |
| 8 | 122085878 | 122099101 - | NM_175185    | Hsdl1  | -3500 | 122102601 | 122102801 |
| 8 | 122099135 | 122122355 + | NM_026648    | Dnaaf1 | 2884  | 122102019 | 122102219 |
| 8 | 122099135 | 122122355 + | NM_026648    | Dnaaf1 | 12215 | 122111350 | 122111550 |
| 8 | 122099135 | 122122355 + | NM_026648    | Dnaaf1 | 3466  | 122102601 | 122102801 |
| 8 | 122190265 | 122211921 + | NM_023395    | Wfdc1  | 3171  | 122193436 | 122193636 |
| 8 | 122190265 | 122211921 + | NM_023395    | Wfdc1  | 8312  | 122198577 | 122198777 |
| 8 | 122190265 | 122211921 + | NM_023395    | Wfdc1  | 4182  | 122194447 | 122194647 |
| 8 | 122333114 | 122364480 - | NM_028071    | Cotl1  | 27281 | 122336999 | 122337199 |
| 8 | 122333114 | 122364480 - | NM_028071    | Cotl1  | 29315 | 122334965 | 122335165 |
| 8 | 122434260 | 122481460 + | NM_001310630 | Usp10  | -1968 | 122432092 | 122432292 |
| 8 | 122434260 | 122481460 + | NM_009462    | Usp10  | -1968 | 122432092 | 122432292 |
| 8 | 122604995 | 122625373 - | NM_133967    | Zdhhc7 | -8    | 122625381 | 122625581 |
| 8 | 122604995 | 122625373 - | NM_133967    | Zdhhc7 | 6387  | 122618786 | 122618986 |
| 8 | 123012766 | 123105284 + | NM_198671    | Gse1   | 3937  | 123016703 | 123016903 |
| 8 | 123260258 | 123280593 + | NM_008320    | Irf8   | -7554 | 123252504 | 123252704 |
| 8 | 123260258 | 123280593 + | NM_008320    | Irf8   | 12237 | 123272495 | 123272695 |
| 8 | 123262539 | 123280593 + | NM_001301811 | Irf8   | -9835 | 123252504 | 123252704 |
| 8 | 123262539 | 123280593 + | NM_001301811 | Irf8   | 9956  | 123272495 | 123272695 |
| 8 | 123621457 | 123632280 - | NM_001166482 | Mthfsd | -80   | 123632360 | 123632560 |
| 8 | 123621457 | 123632280 - | NM_001166482 | Mthfsd | -3221 | 123635501 | 123635701 |
| 8 | 123621457 | 123632280 - | NM_172761    | Mthfsd | -80   | 123632360 | 123632560 |

|   |           |             |              |          |       |           |           |
|---|-----------|-------------|--------------|----------|-------|-----------|-----------|
| 8 | 123621457 | 123632280 - | NM_172761    | Mthfsd   | -3221 | 123635501 | 123635701 |
| 8 | 123640071 | 123642795 + | NM_013519    | Foxc2    | -7511 | 123632360 | 123632560 |
| 8 | 123640071 | 123642795 + | NM_013519    | Foxc2    | -4370 | 123635501 | 123635701 |
| 8 | 124122603 | 124175834 - | NM_080855    | Zcchc14  | 48779 | 124126855 | 124127055 |
| 8 | 124405046 | 124431587 - | NM_011404    | Slc7a5   | -444  | 124432031 | 124432231 |
| 8 | 124405046 | 124431587 - | NM_011404    | Slc7a5   | -1726 | 124433313 | 124433513 |
| 8 | 124431733 | 124442329 + | NM_001033485 | BC048644 | 298   | 124432031 | 124432231 |
| 8 | 124431733 | 124442329 + | NM_001033485 | BC048644 | 1580  | 124433313 | 124433513 |
| 8 | 124474392 | 124553161 + | NM_001110100 | Banp     | 7928  | 124482320 | 124482520 |
| 8 | 124474392 | 124553161 + | NM_001285981 | Banp     | 7928  | 124482320 | 124482520 |
| 8 | 124474392 | 124553161 + | NM_001285983 | Banp     | 7928  | 124482320 | 124482520 |
| 8 | 124474392 | 124553161 + | NM_016812    | Banp     | 7928  | 124482320 | 124482520 |
| 8 | 124806041 | 124861148 + | NM_009569    | Zfpm1    | 701   | 124806742 | 124806942 |
| 8 | 124806041 | 124861148 + | NM_009569    | Zfpm1    | 50027 | 124856068 | 124856268 |
| 8 | 124806041 | 124861148 + | NM_009569    | Zfpm1    | 31312 | 124837353 | 124837553 |
| 8 | 124806041 | 124861148 + | NM_009569    | Zfpm1    | 39671 | 124845712 | 124845912 |
| 8 | 124806041 | 124861148 + | NM_009569    | Zfpm1    | 48353 | 124854394 | 124854594 |
| 8 | 124806041 | 124861148 + | NM_009569    | Zfpm1    | 40672 | 124846713 | 124846913 |
| 8 | 124806041 | 124861148 + | NM_009569    | Zfpm1    | 37357 | 124843398 | 124843598 |
| 8 | 124806041 | 124861148 + | NM_009569    | Zfpm1    | 35836 | 124841877 | 124842077 |
| 8 | 124806041 | 124861148 + | NM_009569    | Zfpm1    | 12193 | 124818234 | 124818434 |
| 8 | 124806041 | 124861148 + | NM_009569    | Zfpm1    | 24720 | 124830761 | 124830961 |
| 8 | 124806041 | 124861148 + | NM_009569    | Zfpm1    | 14390 | 124820431 | 124820631 |
| 8 | 124806041 | 124861148 + | NM_009569    | Zfpm1    | 4927  | 124810968 | 124811168 |
| 8 | 124806041 | 124861148 + | NM_009569    | Zfpm1    | 2386  | 124808427 | 124808627 |
| 8 | 125098537 | 125100808 - | NM_009698    | Aprt     | 2042  | 125098566 | 125098766 |
| 8 | 125149036 | 125202076 - | NM_001109873 | Cbfa2t3  | 41957 | 125159919 | 125160119 |
| 8 | 125149036 | 125202076 - | NM_001109873 | Cbfa2t3  | 42449 | 125159427 | 125159627 |
| 8 | 125149036 | 125223010 - | NM_009824    | Cbfa2t3  | 62891 | 125159919 | 125160119 |
| 8 | 125149036 | 125223010 - | NM_009824    | Cbfa2t3  | 63383 | 125159427 | 125159627 |

|   |           |             |              |               |       |           |           |
|---|-----------|-------------|--------------|---------------|-------|-----------|-----------|
| 8 | 125149036 | 125202076 - | NM_177289    | Cbfa2t3       | 41957 | 125159919 | 125160119 |
| 8 | 125149036 | 125202076 - | NM_177289    | Cbfa2t3       | 42449 | 125159427 | 125159627 |
| 8 | 125407722 | 125566185 - | NM_001081379 | Ankrd11       | 52991 | 125512994 | 125513194 |
| 8 | 125407722 | 125566185 - | NM_001081379 | Ankrd11       | -9795 | 125575980 | 125576180 |
| 8 | 125407722 | 125566185 - | NM_001081379 | Ankrd11       | 58880 | 125507105 | 125507305 |
| 8 | 125407722 | 125566185 - | NM_001081379 | Ankrd11       | 81001 | 125484984 | 125485184 |
| 8 | 125407722 | 125566185 - | NR_037865    | Ankrd11       | 52991 | 125512994 | 125513194 |
| 8 | 125407722 | 125566185 - | NR_037865    | Ankrd11       | -9795 | 125575980 | 125576180 |
| 8 | 125407722 | 125566185 - | NR_037865    | Ankrd11       | 58880 | 125507105 | 125507305 |
| 8 | 125407722 | 125566185 - | NR_037865    | Ankrd11       | 81001 | 125484984 | 125485184 |
| 8 | 125710135 | 125725714 + | NM_007876    | Dpep1         | 10747 | 125720882 | 125721082 |
| 8 | 125756158 | 125760110 - | NM_030176    | Spata2l       | 613   | 125759297 | 125759497 |
| 8 | 125758991 | 125766260 + | NR_045849    | 4933417D19Rik | 306   | 125759297 | 125759497 |
| 8 | 125856613 | 125893419 + | NM_172287    | Spire2        | 19970 | 125876583 | 125876783 |
| 8 | 125856613 | 125893419 + | NM_172287    | Spire2        | 2058  | 125858671 | 125858871 |
| 8 | 125856613 | 125893419 + | NM_172287    | Spire2        | -2952 | 125853461 | 125853661 |
| 8 | 126177829 | 126187781 + | NM_133955    | Rhou          | -4340 | 126173289 | 126173489 |
| 8 | 126177829 | 126187781 + | NM_133955    | Rhou          | -5047 | 126172582 | 126172782 |
| 8 | 126257858 | 126263842 + | NR_040702    | 6030466F02Rik | 3870  | 126261728 | 126261928 |
| 8 | 126329896 | 126359192 + | NM_009003    | Rab4a         | 14835 | 126344731 | 126344931 |
| 8 | 126329896 | 126359192 + | NM_009003    | Rab4a         | -9065 | 126320631 | 126320831 |
| 8 | 126329896 | 126359192 + | NM_009003    | Rab4a         | 9499  | 126339395 | 126339595 |
| 8 | 126329896 | 126359192 + | NM_009003    | Rab4a         | 8379  | 126338275 | 126338475 |
| 8 | 126476359 | 126507023 - | NM_019552    | Abcb10        | -7398 | 126514421 | 126514621 |
| 8 | 126476359 | 126507023 - | NM_019552    | Abcb10        | -5584 | 126512607 | 126512807 |
| 8 | 127159656 | 127187270 - | NM_175149    | 2310022B05Rik | 4599  | 127182471 | 127182671 |
| 8 | 127195227 | 127245876 - | NM_145607    | Ttc13         | -254  | 127246130 | 127246330 |
| 8 | 127195227 | 127245876 - | NM_145607    | Ttc13         | 26013 | 127219663 | 127219863 |
| 8 | 127246039 | 127258024 + | NM_026855    | Arv1          | 91    | 127246130 | 127246330 |
| 8 | 127432487 | 127473155 - | NM_053207    | Egln1         | 27017 | 127445938 | 127446138 |

|   |           |             |              |               |        |           |           |
|---|-----------|-------------|--------------|---------------|--------|-----------|-----------|
| 8 | 127432487 | 127473155 - | NM_053207    | Egln1         | -3281  | 127476436 | 127476636 |
| 8 | 127536897 | 127558093 + | NM_016909    | Tsnax         | 18483  | 127555380 | 127555580 |
| 8 | 127578095 | 127785052 + | NM_174853    | Disc1         | 13441  | 127591536 | 127591736 |
| 8 | 127578095 | 127785052 + | NM_174853    | Disc1         | 162667 | 127740762 | 127740962 |
| 8 | 127578095 | 127785052 + | NM_174853    | Disc1         | 79757  | 127657852 | 127658052 |
| 8 | 127578095 | 127785052 + | NM_174854    | Disc1         | 13441  | 127591536 | 127591736 |
| 8 | 127578095 | 127785052 + | NM_174854    | Disc1         | 162667 | 127740762 | 127740962 |
| 8 | 127578095 | 127785052 + | NM_174854    | Disc1         | 79757  | 127657852 | 127658052 |
| 8 | 128108538 | 128140571 + | NR_015535    | 4930567H12Rik | 11101  | 128119639 | 128119839 |
| 8 | 128108538 | 128140571 + | NR_015535    | 4930567H12Rik | -4809  | 128103529 | 128103729 |
| 8 | 128434350 | 128471340 + | NM_145608    | BC021891      | 5758   | 128440108 | 128440308 |
| 8 | 128434350 | 128471340 + | NM_145608    | BC021891      | 6527   | 128440877 | 128441077 |
| 8 | 128519002 | 128554586 + | NM_008430    | Kcnk1         | 12707  | 128531709 | 128531909 |
| 8 | 128950552 | 128998966 - | NM_001159907 | Gm17296       | -3806  | 129002772 | 129002972 |
| 8 | 129112196 | 129117337 - | NM_001164598 | Irf2bp2       | 4295   | 129112842 | 129113042 |
| 8 | 129471073 | 129494980 - | NM_172762    | Rbm34         | -2815  | 129497795 | 129497995 |
| 8 | 129471073 | 129494980 - | NM_172762    | Rbm34         | -8208  | 129503188 | 129503388 |
| 8 | 129587956 | 129925960 + | NM_001122850 | Pard3         | 264542 | 129852498 | 129852698 |
| 8 | 129587956 | 129925960 + | NM_001122850 | Pard3         | 314718 | 129902674 | 129902874 |
| 8 | 129587956 | 129925960 + | NM_001122850 | Pard3         | 304331 | 129892287 | 129892487 |
| 8 | 129587956 | 129925960 + | NM_001122850 | Pard3         | 292318 | 129880274 | 129880474 |
| 8 | 129587956 | 129925960 + | NM_001122850 | Pard3         | 8688   | 129596644 | 129596844 |
| 8 | 129587956 | 129925960 + | NM_001122850 | Pard3         | 263942 | 129851898 | 129852098 |
| 8 | 129587956 | 129925960 + | NM_001122850 | Pard3         | 236139 | 129824095 | 129824295 |
| 8 | 129587956 | 130136187 + | NM_001309391 | Pard3         | 264542 | 129852498 | 129852698 |
| 8 | 129587956 | 130136187 + | NM_001309391 | Pard3         | 314718 | 129902674 | 129902874 |
| 8 | 129587956 | 130136187 + | NM_001309391 | Pard3         | 525306 | 130113262 | 130113462 |
| 8 | 129587956 | 130136187 + | NM_001309391 | Pard3         | 304331 | 129892287 | 129892487 |
| 8 | 129587956 | 130136187 + | NM_001309391 | Pard3         | 292318 | 129880274 | 129880474 |
| 8 | 129587956 | 130136187 + | NM_001309391 | Pard3         | 8688   | 129596644 | 129596844 |

|   |           |             |              |       |        |           |           |
|---|-----------|-------------|--------------|-------|--------|-----------|-----------|
| 8 | 129587956 | 130136187 + | NM_001309391 | Pard3 | 263942 | 129851898 | 129852098 |
| 8 | 129587956 | 130136187 + | NM_001309391 | Pard3 | 236139 | 129824095 | 129824295 |
| 8 | 129587956 | 130136187 + | NM_001309392 | Pard3 | 264542 | 129852498 | 129852698 |
| 8 | 129587956 | 130136187 + | NM_001309392 | Pard3 | 314718 | 129902674 | 129902874 |
| 8 | 129587956 | 130136187 + | NM_001309392 | Pard3 | 525306 | 130113262 | 130113462 |
| 8 | 129587956 | 130136187 + | NM_001309392 | Pard3 | 304331 | 129892287 | 129892487 |
| 8 | 129587956 | 130136187 + | NM_001309392 | Pard3 | 292318 | 129880274 | 129880474 |
| 8 | 129587956 | 130136187 + | NM_001309392 | Pard3 | 8688   | 129596644 | 129596844 |
| 8 | 129587956 | 130136187 + | NM_001309392 | Pard3 | 263942 | 129851898 | 129852098 |
| 8 | 129587956 | 130136187 + | NM_001309392 | Pard3 | 236139 | 129824095 | 129824295 |
| 8 | 129587956 | 130136187 + | NM_033620    | Pard3 | 264542 | 129852498 | 129852698 |
| 8 | 129587956 | 130136187 + | NM_033620    | Pard3 | 314718 | 129902674 | 129902874 |
| 8 | 129587956 | 130136187 + | NM_033620    | Pard3 | 525306 | 130113262 | 130113462 |
| 8 | 129587956 | 130136187 + | NM_033620    | Pard3 | 304331 | 129892287 | 129892487 |
| 8 | 129587956 | 130136187 + | NM_033620    | Pard3 | 292318 | 129880274 | 129880474 |
| 8 | 129587956 | 130136187 + | NM_033620    | Pard3 | 8688   | 129596644 | 129596844 |
| 8 | 129587956 | 130136187 + | NM_033620    | Pard3 | 263942 | 129851898 | 129852098 |
| 8 | 129587956 | 130136187 + | NM_033620    | Pard3 | 236139 | 129824095 | 129824295 |
| 8 | 129823512 | 129957045 + | NM_001013581 | Pard3 | 28986  | 129852498 | 129852698 |
| 8 | 129823512 | 129957045 + | NM_001013581 | Pard3 | 79162  | 129902674 | 129902874 |
| 8 | 129823512 | 129957045 + | NM_001013581 | Pard3 | 68775  | 129892287 | 129892487 |
| 8 | 129823512 | 129957045 + | NM_001013581 | Pard3 | 56762  | 129880274 | 129880474 |
| 8 | 129823512 | 129957045 + | NM_001013581 | Pard3 | 28386  | 129851898 | 129852098 |
| 8 | 129823512 | 129957045 + | NM_001013581 | Pard3 | 583    | 129824095 | 129824295 |
| 8 | 129823552 | 129925960 + | NM_001013580 | Pard3 | 28946  | 129852498 | 129852698 |
| 8 | 129823552 | 129925960 + | NM_001013580 | Pard3 | 79122  | 129902674 | 129902874 |
| 8 | 129823552 | 129925960 + | NM_001013580 | Pard3 | 68735  | 129892287 | 129892487 |
| 8 | 129823552 | 129925960 + | NM_001013580 | Pard3 | 56722  | 129880274 | 129880474 |
| 8 | 129823552 | 129925960 + | NM_001013580 | Pard3 | 28346  | 129851898 | 129852098 |
| 8 | 129823552 | 129925960 + | NM_001013580 | Pard3 | 543    | 129824095 | 129824295 |

|   |          |            |              |          |       |          |          |
|---|----------|------------|--------------|----------|-------|----------|----------|
| 9 | 3038669  | 3038744 -  | NR_039546    | Mir101c  | 445   | 3038099  | 3038299  |
| 9 | 3038669  | 3038744 -  | NR_039546    | Mir101c  | 2791  | 3035753  | 3035953  |
| 9 | 3335231  | 3385847 +  | NM_026303    | Alkbh8   | -4005 | 3331026  | 3331226  |
| 9 | 3335231  | 3385847 +  | NM_026303    | Alkbh8   | -6721 | 3328310  | 3328510  |
| 9 | 5308849  | 5336792 +  | NM_007609    | Casp4    | 23693 | 5332542  | 5332742  |
| 9 | 7628231  | 7674969 +  | NM_013903    | Mmp20    | 24543 | 7652774  | 7652974  |
| 9 | 7764077  | 7794333 +  | NM_133739    | Tmem123  | 21892 | 7785969  | 7786169  |
| 9 | 7784390  | 7784441 +  | NR_049191    | Mir5618  | 1579  | 7785969  | 7786169  |
| 9 | 7848701  | 7873171 -  | NM_007464    | Birc3    | 17546 | 7855425  | 7855625  |
| 9 | 7932001  | 8004597 -  | NM_001171147 | Yap1     | 1038  | 8003359  | 8003559  |
| 9 | 7932001  | 8004597 -  | NM_009534    | Yap1     | 1038  | 8003359  | 8003559  |
| 9 | 8994953  | 9239014 -  | NM_027823    | Arhgap42 | 19588 | 9219226  | 9219426  |
| 9 | 8994953  | 9239014 -  | NM_027823    | Arhgap42 | 63846 | 9174968  | 9175168  |
| 9 | 13424433 | 13513978 + | NM_001013813 | Maml2    | 85010 | 13509443 | 13509643 |
| 9 | 13424433 | 13513978 + | NM_001013813 | Maml2    | -1574 | 13422659 | 13422859 |
| 9 | 13466904 | 13513978 + | NM_173776    | Maml2    | 42539 | 13509443 | 13509643 |
| 9 | 14267025 | 14304927 - | NM_173433    | Kdm4d    | 8649  | 14296078 | 14296278 |
| 9 | 14305063 | 14315065 + | NM_023153    | Cwc15    | -8785 | 14296078 | 14296278 |
| 9 | 14506802 | 14545178 - | NM_177905    | Piwil4   | -3164 | 14548342 | 14548542 |
| 9 | 14506802 | 14545178 - | NM_177905    | Piwil4   | 911   | 14544067 | 14544267 |
| 9 | 14810229 | 14849923 - | NM_019482    | Panx1    | 10006 | 14839717 | 14839917 |
| 9 | 14810229 | 14849923 - | NM_019482    | Panx1    | 9438  | 14840285 | 14840485 |
| 9 | 14856285 | 14916553 - | NM_001164797 | Heph11   | 47687 | 14868666 | 14868866 |
| 9 | 14856285 | 14916553 - | NM_001164797 | Heph11   | 44653 | 14871700 | 14871900 |
| 9 | 14856285 | 14916553 - | NM_001164797 | Heph11   | 46460 | 14869893 | 14870093 |
| 9 | 14856285 | 14916553 - | NM_001164797 | Heph11   | 52592 | 14863761 | 14863961 |
| 9 | 15043489 | 15063858 + | NM_026955    | Vstm5    | 6424  | 15049913 | 15050113 |
| 9 | 15043489 | 15063858 + | NM_026955    | Vstm5    | 10666 | 15054155 | 15054355 |
| 9 | 15309939 | 15349704 + | NM_133214    | Smco4    | 24499 | 15334438 | 15334638 |
| 9 | 18096711 | 18118445 + | NM_025844    | Chordc1  | 894   | 18097605 | 18097805 |

|   |          |            |              |         |       |          |          |
|---|----------|------------|--------------|---------|-------|----------|----------|
| 9 | 19370879 | 19371827 - | NM_146522    | Olfr854 | -7989 | 19379816 | 19380016 |
| 9 | 19388955 | 19389947 + | NM_146524    | Olfr855 | -8939 | 19379816 | 19380016 |
| 9 | 20272993 | 20297191 - | NM_001110309 | Zfp426  | 0     | 20297057 | 20297257 |
| 9 | 20272993 | 20297191 - | NM_001310742 | Zfp426  | 0     | 20297057 | 20297257 |
| 9 | 20272993 | 20297191 - | NM_146221    | Zfp426  | 0     | 20297057 | 20297257 |
| 9 | 20385772 | 20399638 + | NM_172919    | Zfp846  | -68   | 20385504 | 20385704 |
| 9 | 20574494 | 20619479 - | NM_016919    | Col5a3  | 32555 | 20586724 | 20586924 |
| 9 | 20711650 | 20757424 - | NM_001199431 | Dnmt1   | 30799 | 20726425 | 20726625 |
| 9 | 20711650 | 20764333 - | NM_001199432 | Dnmt1   | 37708 | 20726425 | 20726625 |
| 9 | 20711650 | 20757068 - | NM_001199433 | Dnmt1   | 30443 | 20726425 | 20726625 |
| 9 | 20711650 | 20757424 - | NM_010066    | Dnmt1   | 30799 | 20726425 | 20726625 |
| 9 | 20718534 | 20718609 - | NR_106049    | Mir7081 | -7816 | 20726425 | 20726625 |
| 9 | 20833817 | 20834976 + | NM_023892    | Icam4   | 1307  | 20835124 | 20835324 |
| 9 | 20836482 | 20843481 + | NM_008319    | Icam5   | -1158 | 20835124 | 20835324 |
| 9 | 20836695 | 20836773 - | NR_035438    | Mir1900 | 1449  | 20835124 | 20835324 |
| 9 | 20871958 | 20896453 - | NR_038081    | Gm38431 | 802   | 20895451 | 20895651 |
| 9 | 20878609 | 20896433 - | NM_027911    | Raver1  | 782   | 20895451 | 20895651 |
| 9 | 21069729 | 21079282 + | NM_153583    | Atg4d   | -3    | 21069526 | 21069726 |
| 9 | 21125163 | 21159473 + | NM_001199186 | Slc44a2 | 26159 | 21151322 | 21151522 |
| 9 | 21142272 | 21159473 + | NM_152808    | Slc44a2 | 9050  | 21151322 | 21151522 |
| 9 | 21209686 | 21216165 - | NR_045742    | Gm16853 | 1490  | 21214475 | 21214675 |
| 9 | 21216281 | 21224724 + | NM_021888    | Qtrt1   | -1606 | 21214475 | 21214675 |
| 9 | 21229352 | 21311591 + | NM_001039520 | Dnm2    | 31585 | 21260937 | 21261137 |
| 9 | 21229352 | 21311591 + | NM_001039520 | Dnm2    | 25086 | 21254438 | 21254638 |
| 9 | 21229352 | 21311591 + | NM_001039520 | Dnm2    | 613   | 21229965 | 21230165 |
| 9 | 21229352 | 21311591 + | NM_001253893 | Dnm2    | 31585 | 21260937 | 21261137 |
| 9 | 21229352 | 21311591 + | NM_001253893 | Dnm2    | 25086 | 21254438 | 21254638 |
| 9 | 21229352 | 21311591 + | NM_001253893 | Dnm2    | 613   | 21229965 | 21230165 |
| 9 | 21229352 | 21312204 + | NM_001253894 | Dnm2    | 31585 | 21260937 | 21261137 |
| 9 | 21229352 | 21312204 + | NM_001253894 | Dnm2    | 25086 | 21254438 | 21254638 |



|   |          |            |              |         |        |          |          |
|---|----------|------------|--------------|---------|--------|----------|----------|
| 9 | 21229352 | 21312204 + | NM_001253894 | Dnm2    | 613    | 21229965 | 21230165 |
| 9 | 21229352 | 21311591 + | NM_007871    | Dnm2    | 31585  | 21260937 | 21261137 |
| 9 | 21229352 | 21311591 + | NM_007871    | Dnm2    | 25086  | 21254438 | 21254638 |
| 9 | 21229352 | 21311591 + | NM_007871    | Dnm2    | 613    | 21229965 | 21230165 |
| 9 | 21351338 | 21393910 + | NM_021531    | Carm1   | 11497  | 21362835 | 21363035 |
| 9 | 21351338 | 21393910 + | NM_153141    | Carm1   | 11497  | 21362835 | 21363035 |
| 9 | 21420613 | 21508675 + | NM_001174078 | Smarca4 | 72459  | 21493072 | 21493272 |
| 9 | 21420613 | 21508675 + | NM_001174079 | Smarca4 | 72459  | 21493072 | 21493272 |
| 9 | 21420613 | 21508675 + | NM_011417    | Smarca4 | 72459  | 21493072 | 21493272 |
| 9 | 21528020 | 21554363 + | NM_001252658 | Ldlr    | -4091  | 21523729 | 21523929 |
| 9 | 21528020 | 21554363 + | NM_001252658 | Ldlr    | 2724   | 21530744 | 21530944 |
| 9 | 21528020 | 21554363 + | NM_001252659 | Ldlr    | -4091  | 21523729 | 21523929 |
| 9 | 21528020 | 21554363 + | NM_001252659 | Ldlr    | 2724   | 21530744 | 21530944 |
| 9 | 21528020 | 21554363 + | NM_010700    | Ldlr    | -4091  | 21523729 | 21523929 |
| 9 | 21528020 | 21554363 + | NM_010700    | Ldlr    | 2724   | 21530744 | 21530944 |
| 9 | 21559886 | 21564731 - | NM_026282    | Spc24   | -2125  | 21566856 | 21567056 |
| 9 | 21604624 | 21657080 - | NM_177030    | Dock6   | -229   | 21657309 | 21657509 |
| 9 | 21604624 | 21657080 - | NM_177030    | Dock6   | -5290  | 21662370 | 21662570 |
| 9 | 21819449 | 21856468 - | NM_010487    | Elavl3  | 23526  | 21832742 | 21832942 |
| 9 | 21931171 | 21936310 - | NM_001102404 | Acp5    | -5771  | 21942081 | 21942281 |
| 9 | 21931171 | 21940191 - | NM_001102405 | Acp5    | -1890  | 21942081 | 21942281 |
| 9 | 21931171 | 21935043 - | NM_007388    | Acp5    | -7038  | 21942081 | 21942281 |
| 9 | 21992610 | 22006568 + | NM_001033813 | Zfp872  | 8332   | 22000942 | 22001142 |
| 9 | 22280159 | 22692725 + | NM_178415    | Bbs9    | 166711 | 22446870 | 22447070 |
| 9 | 22280159 | 22692725 + | NM_178415    | Bbs9    | 42859  | 22323018 | 22323218 |
| 9 | 22280159 | 22692725 + | NM_181316    | Bbs9    | 166711 | 22446870 | 22447070 |
| 9 | 22280159 | 22692725 + | NM_181316    | Bbs9    | 42859  | 22323018 | 22323218 |
| 9 | 23027520 | 23289660 + | NM_028472    | Bmper   | 230322 | 23257842 | 23258042 |
| 9 | 24912574 | 24956281 - | NM_020586    | Herpud2 | 33610  | 24922471 | 24922671 |
| 9 | 25289182 | 25411696 + | NM_026189    | Eepd1   | 81840  | 25371022 | 25371222 |

|   |          |            |              |           |        |          |          |
|---|----------|------------|--------------|-----------|--------|----------|----------|
| 9 | 25289182 | 25411696 + | NM_026189    | Eepd1     | 107068 | 25396250 | 25396450 |
| 9 | 25289182 | 25411696 + | NM_026189    | Eepd1     | 97442  | 25386624 | 25386824 |
| 9 | 25289182 | 25411696 + | NM_026189    | Eepd1     | 35427  | 25324609 | 25324809 |
| 9 | 25289182 | 25411696 + | NM_026189    | Eepd1     | 75806  | 25364988 | 25365188 |
| 9 | 25289182 | 25411696 + | NM_026189    | Eepd1     | 67081  | 25356263 | 25356463 |
| 9 | 25289182 | 25411696 + | NM_026189    | Eepd1     | 17239  | 25306421 | 25306621 |
| 9 | 25289182 | 25411696 + | NM_026189    | Eepd1     | 7078   | 25296260 | 25296460 |
| 9 | 30838229 | 30883471 + | NM_001115130 | Zbtb44    | 20328  | 30858557 | 30858757 |
| 9 | 30838229 | 30883471 + | NM_001115130 | Zbtb44    | -6145  | 30831884 | 30832084 |
| 9 | 30838229 | 30883471 + | NM_172765    | Zbtb44    | 20328  | 30858557 | 30858757 |
| 9 | 30838229 | 30883471 + | NM_172765    | Zbtb44    | -6145  | 30831884 | 30832084 |
| 9 | 30896175 | 30939385 - | NM_011176    | St14      | 12158  | 30927027 | 30927227 |
| 9 | 30896175 | 30939385 - | NM_011176    | St14      | 8135   | 30931050 | 30931250 |
| 9 | 30896175 | 30939385 - | NM_011176    | St14      | 27264  | 30911921 | 30912121 |
| 9 | 30942992 | 31066971 - | NR_037304    | Mir3471-1 | 6696   | 31060075 | 31060275 |
| 9 | 30942992 | 31066971 - | NR_037304    | Mir3471-1 | 4487   | 31062284 | 31062484 |
| 9 | 30942992 | 31066971 - | NR_037304    | Mir3471-1 | 54323  | 31012448 | 31012648 |
| 9 | 30957142 | 31019401 - | NM_001102455 | Aplp2     | 6753   | 31012448 | 31012648 |
| 9 | 30957142 | 31019401 - | NM_001102456 | Aplp2     | 6753   | 31012448 | 31012648 |
| 9 | 30957142 | 31019401 - | NM_009691    | Aplp2     | 6753   | 31012448 | 31012648 |
| 9 | 31122692 | 31186129 + | NM_001080817 | Prdm10    | 30575  | 31153267 | 31153467 |
| 9 | 31233781 | 31271824 - | NM_144936    | Tmem45b   | 780    | 31270844 | 31271044 |
| 9 | 31233781 | 31271824 - | NM_144936    | Tmem45b   | -6916  | 31278740 | 31278940 |
| 9 | 31233781 | 31271824 - | NM_144936    | Tmem45b   | 26091  | 31245533 | 31245733 |
| 9 | 31233781 | 31271824 - | NM_144936    | Tmem45b   | 31449  | 31240175 | 31240375 |
| 9 | 31653629 | 31720871 - | NM_013800    | Barx2     | 39420  | 31681251 | 31681451 |
| 9 | 31653629 | 31720871 - | NM_013800    | Barx2     | -8853  | 31729724 | 31729924 |
| 9 | 31653629 | 31720871 - | NM_013800    | Barx2     | 3336   | 31717335 | 31717535 |
| 9 | 31653629 | 31720871 - | NM_013800    | Barx2     | -789   | 31721660 | 31721860 |
| 9 | 31653629 | 31720871 - | NM_013800    | Barx2     | 7378   | 31713293 | 31713493 |

|   |          |            |              |               |        |          |          |
|---|----------|------------|--------------|---------------|--------|----------|----------|
| 9 | 31653629 | 31720871 - | NM_013800    | Barx2         | 41726  | 31678945 | 31679145 |
| 9 | 31653629 | 31720871 - | NM_013800    | Barx2         | 61209  | 31659462 | 31659662 |
| 9 | 31923721 | 32073097 + | NM_001195632 | Arhgap32      | 42957  | 31966678 | 31966878 |
| 9 | 32229789 | 32349038 - | NM_008026    | Fli1          | 115262 | 32233576 | 32233776 |
| 9 | 32229789 | 32349038 - | NM_008026    | Fli1          | 116251 | 32232587 | 32232787 |
| 9 | 32503627 | 32565406 + | NM_001038642 | Ets1          | 10405  | 32514032 | 32514232 |
| 9 | 32503627 | 32565406 + | NM_001038642 | Ets1          | 35882  | 32539509 | 32539709 |
| 9 | 32503627 | 32565406 + | NM_011808    | Ets1          | 10405  | 32514032 | 32514232 |
| 9 | 32503627 | 32565406 + | NM_011808    | Ets1          | 35882  | 32539509 | 32539709 |
| 9 | 34296316 | 34843893 + | NM_001190911 | Kirrel3       | 540969 | 34837285 | 34837485 |
| 9 | 34296316 | 34843893 + | NM_001190911 | Kirrel3       | 494838 | 34791154 | 34791354 |
| 9 | 34296316 | 34843893 + | NM_001190912 | Kirrel3       | 540969 | 34837285 | 34837485 |
| 9 | 34296316 | 34843893 + | NM_001190912 | Kirrel3       | 494838 | 34791154 | 34791354 |
| 9 | 34296316 | 34838464 + | NM_001190913 | Kirrel3       | 540969 | 34837285 | 34837485 |
| 9 | 34296316 | 34838464 + | NM_001190913 | Kirrel3       | 494838 | 34791154 | 34791354 |
| 9 | 34296316 | 34843893 + | NM_001190914 | Kirrel3       | 540969 | 34837285 | 34837485 |
| 9 | 34296316 | 34843893 + | NM_001190914 | Kirrel3       | 494838 | 34791154 | 34791354 |
| 9 | 34296316 | 34843893 + | NM_026324    | Kirrel3       | 540969 | 34837285 | 34837485 |
| 9 | 34296316 | 34843893 + | NM_026324    | Kirrel3       | 494838 | 34791154 | 34791354 |
| 9 | 34854164 | 34924396 - | NM_009178    | St3gal4       | 57531  | 34866665 | 34866865 |
| 9 | 34854164 | 34924396 - | NM_009178    | St3gal4       | 10590  | 34913606 | 34913806 |
| 9 | 34854164 | 34924396 - | NM_009178    | St3gal4       | 6484   | 34917712 | 34917912 |
| 9 | 34854164 | 34924396 - | NM_009178    | St3gal4       | 25932  | 34898264 | 34898464 |
| 9 | 34854164 | 34924396 - | NM_009178    | St3gal4       | 53080  | 34871116 | 34871316 |
| 9 | 34854164 | 34924396 - | NM_009178    | St3gal4       | 58477  | 34865719 | 34865919 |
| 9 | 34854164 | 34924396 - | NM_009178    | St3gal4       | 68043  | 34856153 | 34856353 |
| 9 | 34924313 | 34938508 + | NR_029475    | 4930581F22Rik | 13803  | 34938116 | 34938316 |
| 9 | 34924313 | 34938508 + | NR_029475    | 4930581F22Rik | -6401  | 34917712 | 34917912 |
| 9 | 34931999 | 34983573 - | NM_027030    | Dcps          | 11295  | 34972078 | 34972278 |
| 9 | 34931999 | 34983573 - | NM_027030    | Dcps          | 45257  | 34938116 | 34938316 |

|   |          |            |              |               |        |          |          |
|---|----------|------------|--------------|---------------|--------|----------|----------|
| 9 | 35024550 | 35075391 - | NM_001286604 | Fam118b       | 5579   | 35069612 | 35069812 |
| 9 | 35024550 | 35075391 - | NM_001286604 | Fam118b       | 10091  | 35065100 | 35065300 |
| 9 | 35024550 | 35075391 - | NM_175411    | Fam118b       | 5579   | 35069612 | 35069812 |
| 9 | 35024550 | 35075391 - | NM_175411    | Fam118b       | 10091  | 35065100 | 35065300 |
| 9 | 35024550 | 35075391 - | NM_194257    | Fam118b       | 5579   | 35069612 | 35069812 |
| 9 | 35024550 | 35075391 - | NM_194257    | Fam118b       | 10091  | 35065100 | 35065300 |
| 9 | 35075466 | 35083543 + | NM_028040    | Rpusd4        | -5654  | 35069612 | 35069812 |
| 9 | 36539998 | 36575164 - | NM_008408    | Stt3a         | 268    | 36574696 | 36574896 |
| 9 | 36651244 | 36686226 + | NM_183171    | Fez1          | 20100  | 36671344 | 36671544 |
| 9 | 37015808 | 37030814 + | NM_025464    | Tmem218       | 843    | 37016651 | 37016851 |
| 9 | 37015901 | 37030814 + | NM_001310096 | Tmem218       | 750    | 37016651 | 37016851 |
| 9 | 37410879 | 37421306 - | NM_011449    | Spa17         | -714   | 37422020 | 37422220 |
| 9 | 37421432 | 37455904 + | NM_011734    | Siae          | 588    | 37422020 | 37422220 |
| 9 | 37662405 | 37663341 + | NM_146417    | Olfr877       | -7667  | 37654538 | 37654738 |
| 9 | 39999901 | 40021190 + | NM_030713    | Zfp202        | 482    | 40000383 | 40000583 |
| 9 | 40105492 | 40263350 - | NM_172768    | Gramd1b       | -5756  | 40269106 | 40269306 |
| 9 | 40105492 | 40263350 - | NM_172768    | Gramd1b       | 66300  | 40196850 | 40197050 |
| 9 | 40105492 | 40263350 - | NM_172768    | Gramd1b       | 35030  | 40228120 | 40228320 |
| 9 | 40105492 | 40263350 - | NM_172768    | Gramd1b       | 17863  | 40245287 | 40245487 |
| 9 | 40105492 | 40263350 - | NM_172768    | Gramd1b       | 34584  | 40228566 | 40228766 |
| 9 | 40105492 | 40263350 - | NM_172768    | Gramd1b       | 35374  | 40227776 | 40227976 |
| 9 | 40105492 | 40263350 - | NM_172768    | Gramd1b       | 41136  | 40222014 | 40222214 |
| 9 | 40105492 | 40263350 - | NM_172768    | Gramd1b       | 132507 | 40130643 | 40130843 |
| 9 | 40105492 | 40263350 - | NM_172768    | Gramd1b       | 79214  | 40183936 | 40184136 |
| 9 | 40105492 | 40263350 - | NM_172768    | Gramd1b       | 124895 | 40138255 | 40138455 |
| 9 | 40105492 | 40263350 - | NM_172768    | Gramd1b       | 134399 | 40128751 | 40128951 |
| 9 | 40141057 | 40150923 + | NR_040728    | 1700110K17Rik | -2602  | 40138255 | 40138455 |
| 9 | 40494047 | 40592130 + | NM_133733    | Clmp          | 90611  | 40584658 | 40584858 |
| 9 | 41776572 | 41932373 - | NM_011436    | Sorl1         | 14221  | 41917952 | 41918152 |
| 9 | 41990321 | 42017315 - | NR_040754    | 4930546K05Rik | 12834  | 42004281 | 42004481 |

|   |          |            |              |         |       |          |          |
|---|----------|------------|--------------|---------|-------|----------|----------|
| 9 | 42062260 | 42072384 - | NM_172769    | Sc5d    | 2146  | 42070038 | 42070238 |
| 9 | 42932022 | 43013839 - | NM_011139    | Pou2f3  | 55339 | 42958300 | 42958500 |
| 9 | 43029361 | 43047900 - | NM_178644    | Oaf     | 12723 | 43034977 | 43035177 |
| 9 | 43552659 | 43615545 + | NM_021424    | Pvrl1   | 31245 | 43583904 | 43584104 |
| 9 | 43875104 | 43903711 + | NM_198092    | Usp2    | 16375 | 43891479 | 43891679 |
| 9 | 43875104 | 43903711 + | NM_198092    | Usp2    | 9863  | 43884967 | 43885167 |
| 9 | 43877512 | 43903711 + | NM_016808    | Usp2    | 13967 | 43891479 | 43891679 |
| 9 | 43877512 | 43903711 + | NM_016808    | Usp2    | 7455  | 43884967 | 43885167 |
| 9 | 43893003 | 43903711 + | NM_198091    | Usp2    | -1324 | 43891479 | 43891679 |
| 9 | 43893003 | 43903711 + | NM_198091    | Usp2    | -7836 | 43884967 | 43885167 |
| 9 | 43957345 | 44042130 - | NM_007619    | Cbl     | 58095 | 43983835 | 43984035 |
| 9 | 44187573 | 44200453 + | NM_021395    | Hyou1   | -275  | 44187098 | 44187298 |
| 9 | 44494391 | 44543282 - | NM_153537    | Phldb1  | 21843 | 44521239 | 44521439 |
| 9 | 44494391 | 44543282 - | NM_153537    | Phldb1  | 2894  | 44540188 | 44540388 |
| 9 | 44494391 | 44543282 - | NM_153537    | Phldb1  | 11799 | 44531283 | 44531483 |
| 9 | 44550228 | 44575892 - | NM_145985    | Arcn1   | -4890 | 44580782 | 44580982 |
| 9 | 44581092 | 44600798 + | NM_023831    | Ift46   | -110  | 44580782 | 44580982 |
| 9 | 44611438 | 44689358 - | NM_001081049 | Kmt2a   | -8941 | 44698299 | 44698499 |
| 9 | 44731210 | 44773684 - | NM_145400    | Ube4a   | 139   | 44773345 | 44773545 |
| 9 | 44863264 | 44883126 + | NM_001093749 | Mpzl3   | 8321  | 44871585 | 44871785 |
| 9 | 44887266 | 44916615 + | NM_001005421 | Amica1  | 24513 | 44911779 | 44911979 |
| 9 | 44915259 | 44943690 - | NR_033547    | Gm10684 | 2040  | 44941450 | 44941650 |
| 9 | 44915259 | 44943690 - | NR_033547    | Gm10684 | 23130 | 44920360 | 44920560 |
| 9 | 44915259 | 44943690 - | NR_033547    | Gm10684 | 16148 | 44927342 | 44927542 |
| 9 | 44925959 | 44938154 + | NM_001014761 | Scn2b   | -5399 | 44920360 | 44920560 |
| 9 | 44925959 | 44938154 + | NM_001014761 | Scn2b   | 1383  | 44927342 | 44927542 |
| 9 | 44947125 | 44962145 + | NM_001013390 | Scn4b   | -5475 | 44941450 | 44941650 |
| 9 | 44980809 | 45012159 - | NM_145403    | Tmprss4 | 0     | 45012137 | 45012337 |
| 9 | 44980809 | 45012159 - | NM_145403    | Tmprss4 | 15160 | 44996799 | 44996999 |
| 9 | 44980809 | 45012159 - | NM_145403    | Tmprss4 | 15537 | 44996422 | 44996622 |

|   |          |            |              |          |        |          |          |
|---|----------|------------|--------------|----------|--------|----------|----------|
| 9 | 45003849 | 45058069 + | NM_001198971 | BC049352 | 8288   | 45012137 | 45012337 |
| 9 | 45003849 | 45058069 + | NM_001198971 | BC049352 | -6850  | 44996799 | 44996999 |
| 9 | 45003849 | 45058069 + | NM_001198971 | BC049352 | -7227  | 44996422 | 44996622 |
| 9 | 45575029 | 45636722 - | NM_001081373 | Cep164   | -2836  | 45639558 | 45639758 |
| 9 | 45575029 | 45636722 - | NM_001081373 | Cep164   | -370   | 45637092 | 45637292 |
| 9 | 45646612 | 45670568 + | NM_001145947 | Bace1    | -6854  | 45639558 | 45639758 |
| 9 | 45646612 | 45670568 + | NM_001145947 | Bace1    | -9320  | 45637092 | 45637292 |
| 9 | 45646612 | 45670568 + | NM_011792    | Bace1    | -6854  | 45639558 | 45639758 |
| 9 | 45646612 | 45670568 + | NM_011792    | Bace1    | -9320  | 45637092 | 45637292 |
| 9 | 45773394 | 45792955 - | NM_008775    | Pafah1b2 | -285   | 45793240 | 45793440 |
| 9 | 45820903 | 46032278 + | NM_027498    | Sik3     | 194170 | 46015073 | 46015273 |
| 9 | 46036713 | 46038553 + | NM_009692    | Apoa1    | -1445  | 46035068 | 46035268 |
| 9 | 46036713 | 46038553 + | NM_009692    | Apoa1    | 989    | 46037702 | 46037902 |
| 9 | 46036713 | 46038553 + | NM_009692    | Apoa1    | 0      | 46036638 | 46036838 |
| 9 | 46041133 | 46043383 - | NM_001289755 | Apoc3    | -2218  | 46045601 | 46045801 |
| 9 | 46041133 | 46043383 - | NM_001289755 | Apoc3    | -6647  | 46050030 | 46050230 |
| 9 | 46041133 | 46043383 - | NM_001289755 | Apoc3    | -525   | 46043908 | 46044108 |
| 9 | 46041133 | 46043720 - | NM_001289756 | Apoc3    | -1881  | 46045601 | 46045801 |
| 9 | 46041133 | 46043720 - | NM_001289756 | Apoc3    | -6310  | 46050030 | 46050230 |
| 9 | 46041133 | 46043720 - | NM_001289756 | Apoc3    | -188   | 46043908 | 46044108 |
| 9 | 46041133 | 46043383 - | NM_001289833 | Apoc3    | -2218  | 46045601 | 46045801 |
| 9 | 46041133 | 46043383 - | NM_001289833 | Apoc3    | -6647  | 46050030 | 46050230 |
| 9 | 46041133 | 46043383 - | NM_001289833 | Apoc3    | -525   | 46043908 | 46044108 |
| 9 | 46041133 | 46043383 - | NM_023114    | Apoc3    | -2218  | 46045601 | 46045801 |
| 9 | 46041133 | 46043383 - | NM_023114    | Apoc3    | -6647  | 46050030 | 46050230 |
| 9 | 46041133 | 46043383 - | NM_023114    | Apoc3    | -525   | 46043908 | 46044108 |
| 9 | 46048927 | 46051542 + | NM_007468    | Apoa4    | -3126  | 46045601 | 46045801 |
| 9 | 46048927 | 46051542 + | NM_007468    | Apoa4    | 1103   | 46050030 | 46050230 |
| 9 | 46048927 | 46051542 + | NM_007468    | Apoa4    | -4819  | 46043908 | 46044108 |
| 9 | 48462402 | 48644051 - | NM_001033324 | Zbtb16   | 112010 | 48531841 | 48532041 |

|   |          |            |              |               |       |          |          |
|---|----------|------------|--------------|---------------|-------|----------|----------|
| 9 | 50329722 | 50336747 - | NM_011220    | Pts           | -8076 | 50344823 | 50345023 |
| 9 | 50341192 | 50363244 - | NM_133217    | Bco2          | 1567  | 50361477 | 50361677 |
| 9 | 50341192 | 50363244 - | NM_133217    | Bco2          | 684   | 50362360 | 50362560 |
| 9 | 50341192 | 50363244 - | NM_133217    | Bco2          | 18221 | 50344823 | 50345023 |
| 9 | 50365253 | 50369374 - | NM_025687    | Tex12         | -8540 | 50377914 | 50378114 |
| 9 | 50373473 | 50389943 + | NM_008360    | Il18          | 4441  | 50377914 | 50378114 |
| 9 | 50404445 | 50411955 - | NM_025848    | Sdhd          | -570  | 50412525 | 50412725 |
| 9 | 50404445 | 50411955 - | NM_025848    | Sdhd          | 1146  | 50410609 | 50410809 |
| 9 | 50412006 | 50413426 + | NM_013897    | Timm8b        | 519   | 50412525 | 50412725 |
| 9 | 50412006 | 50413426 + | NM_013897    | Timm8b        | -1197 | 50410609 | 50410809 |
| 9 | 50442738 | 50467886 - | NM_145614    | Dlat          | -2711 | 50470597 | 50470797 |
| 9 | 50700906 | 50817179 - | NM_178710    | Sik2          | 84352 | 50732627 | 50732827 |
| 9 | 51021795 | 51048185 + | NM_011136    | Pou2af1       | 17819 | 51039614 | 51039814 |
| 9 | 51021795 | 51048185 + | NM_011136    | Pou2af1       | 17098 | 51038893 | 51039093 |
| 9 | 51078363 | 51086660 - | NM_001195681 | Gm684         | 3370  | 51083090 | 51083290 |
| 9 | 51097791 | 51137023 - | NM_027217    | 1810046K07Rik | 10398 | 51126425 | 51126625 |
| 9 | 51097791 | 51137023 - | NM_027217    | 1810046K07Rik | 18151 | 51118672 | 51118872 |
| 9 | 51097791 | 51137023 - | NM_027217    | 1810046K07Rik | 13241 | 51123582 | 51123782 |
| 9 | 51097791 | 51137023 - | NM_027217    | 1810046K07Rik | 15516 | 51121307 | 51121507 |
| 9 | 51751130 | 51771708 - | NM_007996    | Fdx1          | 6312  | 51765196 | 51765396 |
| 9 | 51753076 | 51771708 - | NM_001301728 | Fdx1          | 6312  | 51765196 | 51765396 |
| 9 | 53109775 | 53189264 + | NM_176846    | Exph5         | 65876 | 53175651 | 53175851 |
| 9 | 53109775 | 53189264 + | NM_176846    | Exph5         | 76042 | 53185817 | 53186017 |
| 9 | 53109775 | 53189264 + | NM_176846    | Exph5         | 75291 | 53185066 | 53185266 |
| 9 | 53109775 | 53189264 + | NM_176846    | Exph5         | 69852 | 53179627 | 53179827 |
| 9 | 53109775 | 53189264 + | NM_176846    | Exph5         | 22066 | 53131841 | 53132041 |
| 9 | 53109775 | 53189264 + | NM_176846    | Exph5         | 4428  | 53114203 | 53114403 |
| 9 | 53192128 | 53209973 + | NM_212445    | Kdelc2        | -6111 | 53185817 | 53186017 |
| 9 | 53192128 | 53209973 + | NM_212445    | Kdelc2        | -6862 | 53185066 | 53185266 |
| 9 | 53245227 | 53344777 - | NM_007499    | Atm           | 18377 | 53326200 | 53326400 |

|   |          |            |              |               |        |          |          |
|---|----------|------------|--------------|---------------|--------|----------|----------|
| 9 | 53245227 | 53344777 - | NM_007499    | Atm           | 47387  | 53297190 | 53297390 |
| 9 | 53619342 | 53665969 + | NM_028060    | Slc35f2       | -203   | 53618939 | 53619139 |
| 9 | 53619342 | 53665969 + | NM_028060    | Slc35f2       | 17499  | 53636841 | 53637041 |
| 9 | 53619342 | 53665969 + | NM_028060    | Slc35f2       | 4336   | 53623678 | 53623878 |
| 9 | 53873413 | 53916219 - | NM_001033535 | Tnfaip8l3     | -449   | 53916668 | 53916868 |
| 9 | 53873413 | 53916219 - | NM_001033535 | Tnfaip8l3     | 16392  | 53899627 | 53899827 |
| 9 | 54452804 | 54509693 - | NM_053178    | Acsbg1        | 47221  | 54462272 | 54462472 |
| 9 | 54711562 | 54760342 + | NM_022655    | Ireb2         | 6516   | 54718078 | 54718278 |
| 9 | 54711562 | 54760342 + | NM_022655    | Ireb2         | 33343  | 54744905 | 54745105 |
| 9 | 54711562 | 54760342 + | NM_022655    | Ireb2         | -7870  | 54703492 | 54703692 |
| 9 | 55056742 | 55072241 + | NM_028049    | Fbxo22        | 2619   | 55059361 | 55059561 |
| 9 | 55068029 | 55131433 - | NM_032002    | Nrg4          | 41412  | 55089821 | 55090021 |
| 9 | 55068029 | 55131433 - | NM_032002    | Nrg4          | 18557  | 55112676 | 55112876 |
| 9 | 55397690 | 55785923 - | NM_001081341 | Scaper        | 134532 | 55651191 | 55651391 |
| 9 | 56048936 | 56265858 - | NM_172924    | Peak1         | 145604 | 56120054 | 56120254 |
| 9 | 56048936 | 56265858 - | NM_172924    | Peak1         | 16399  | 56249259 | 56249459 |
| 9 | 56048936 | 56265858 - | NM_172924    | Peak1         | 88749  | 56176909 | 56177109 |
| 9 | 56048936 | 56265858 - | NM_172924    | Peak1         | 205224 | 56060434 | 56060634 |
| 9 | 56048936 | 56265858 - | NM_172924    | Peak1         | 154683 | 56110975 | 56111175 |
| 9 | 56048936 | 56265858 - | NM_172924    | Peak1         | 203382 | 56062276 | 56062476 |
| 9 | 56798731 | 56831007 + | NM_178374    | Snupn         | 15298  | 56814029 | 56814229 |
| 9 | 56842775 | 56910615 + | NM_019651    | Ptpn9         | -203   | 56842372 | 56842572 |
| 9 | 57238877 | 57248172 + | NR_040729    | 4930430J02Rik | 1678   | 57240555 | 57240755 |
| 9 | 57289134 | 57315868 - | NM_001301634 | Scamp5        | 15138  | 57300530 | 57300730 |
| 9 | 57289134 | 57315868 - | NM_001301635 | Scamp5        | 15138  | 57300530 | 57300730 |
| 9 | 57289134 | 57315868 - | NM_020270    | Scamp5        | 15138  | 57300530 | 57300730 |
| 9 | 57351909 | 57353255 + | NM_133982    | Rpp25         | 1814   | 57353723 | 57353923 |
| 9 | 57385335 | 57390995 + | NM_001166364 | Fam219b       | 4600   | 57389935 | 57390135 |
| 9 | 57385335 | 57390995 + | NM_175273    | Fam219b       | 4600   | 57389935 | 57390135 |
| 9 | 57392075 | 57400560 - | NM_025837    | Mpi           | 5165   | 57395195 | 57395395 |



|   |          |            |              |         |        |          |          |
|---|----------|------------|--------------|---------|--------|----------|----------|
| 9 | 57392075 | 57400560 - | NM_025837    | Mpi     | -7719  | 57408279 | 57408479 |
| 9 | 57392075 | 57400560 - | NM_025837    | Mpi     | 116    | 57400244 | 57400444 |
| 9 | 57392075 | 57400560 - | NM_025837    | Mpi     | 2342   | 57398018 | 57398218 |
| 9 | 57408751 | 57436606 + | NM_022813    | Scamp2  | -272   | 57408279 | 57408479 |
| 9 | 57408751 | 57436606 + | NM_022813    | Scamp2  | -8307  | 57400244 | 57400444 |
| 9 | 57474453 | 57501439 - | NM_001304761 | Csk     | 15098  | 57486141 | 57486341 |
| 9 | 57474453 | 57493461 - | NM_007783    | Csk     | 7120   | 57486141 | 57486341 |
| 9 | 57787942 | 57810673 + | NM_011352    | Sema7a  | 11066  | 57799008 | 57799208 |
| 9 | 57787942 | 57810673 + | NM_011352    | Sema7a  | 19655  | 57807597 | 57807797 |
| 9 | 57787942 | 57810673 + | NM_011352    | Sema7a  | 14970  | 57802912 | 57803112 |
| 9 | 58430047 | 58500687 + | NM_001293673 | Nptn    | 45478  | 58475525 | 58475725 |
| 9 | 58430047 | 58500687 + | NM_009145    | Nptn    | 45478  | 58475525 | 58475725 |
| 9 | 58500663 | 58589367 - | NM_028598    | Rec114  | 86614  | 58502553 | 58502753 |
| 9 | 58722487 | 58884249 - | NM_001042752 | Neo1    | 22739  | 58861310 | 58861510 |
| 9 | 58722487 | 58884249 - | NM_001042752 | Neo1    | 46581  | 58837468 | 58837668 |
| 9 | 58722487 | 58884249 - | NM_008684    | Neo1    | 22739  | 58861310 | 58861510 |
| 9 | 58722487 | 58884249 - | NM_008684    | Neo1    | 46581  | 58837468 | 58837668 |
| 9 | 59139379 | 59164008 + | NM_028121    | Adpgk   | -190   | 59138989 | 59139189 |
| 9 | 59236361 | 59334182 - | NM_019927    | Arih1   | -1613  | 59335795 | 59335995 |
| 9 | 59236361 | 59334182 - | NM_019927    | Arih1   | 38222  | 59295760 | 59295960 |
| 9 | 59325552 | 59329549 - | NR_045640    | Gm20199 | -6246  | 59335795 | 59335995 |
| 9 | 59387474 | 59412913 + | NM_010421    | Hexa    | 3219   | 59390693 | 59390893 |
| 9 | 59504175 | 59527183 + | NM_001253883 | Pkm     | 8338   | 59512513 | 59512713 |
| 9 | 59504175 | 59527183 + | NM_011099    | Pkm     | 8338   | 59512513 | 59512713 |
| 9 | 59555571 | 59564232 + | NM_001033498 | Gramd2  | -5230  | 59550141 | 59550341 |
| 9 | 59555571 | 59564232 + | NM_001033498 | Gramd2  | 1439   | 59557010 | 59557210 |
| 9 | 59790578 | 59797887 - | NM_013708    | Nr2e3   | -2430  | 59800317 | 59800517 |
| 9 | 59799101 | 59806852 + | NM_001101600 | Gm7616  | 1216   | 59800317 | 59800517 |
| 9 | 59814738 | 60358843 - | NM_001040426 | Thsd4   | 174695 | 60183948 | 60184148 |
| 9 | 59814738 | 60358843 - | NM_001040426 | Thsd4   | 168888 | 60189755 | 60189955 |

|   |          |            |              |               |        |          |          |
|---|----------|------------|--------------|---------------|--------|----------|----------|
| 9 | 59814738 | 60358843 - | NM_001040426 | Thsd4         | 231290 | 60127353 | 60127553 |
| 9 | 59814738 | 60358843 - | NM_001040426 | Thsd4         | 276063 | 60082580 | 60082780 |
| 9 | 60371774 | 60393690 - | NR_040463    | 9230112J17Rik | 235    | 60393255 | 60393455 |
| 9 | 60371774 | 60393690 - | NR_040463    | 9230112J17Rik | -376   | 60394066 | 60394266 |
| 9 | 60371774 | 60393690 - | NR_040464    | 9230112J17Rik | 235    | 60393255 | 60393455 |
| 9 | 60371774 | 60393690 - | NR_040464    | 9230112J17Rik | -376   | 60394066 | 60394266 |
| 9 | 60642355 | 60728178 + | NM_028283    | Uaca          | 14051  | 60656406 | 60656606 |
| 9 | 60642355 | 60728178 + | NM_028283    | Uaca          | 20955  | 60663310 | 60663510 |
| 9 | 60642355 | 60728178 + | NM_028283    | Uaca          | 6257   | 60648612 | 60648812 |
| 9 | 60642355 | 60728178 + | NM_028283    | Uaca          | -342   | 60641813 | 60642013 |
| 9 | 60950819 | 60953194 - | NR_105026    | 4933433G08Rik | -6547  | 60959741 | 60959941 |
| 9 | 61107034 | 61141617 - | NR_045334    | B930092H01Rik | 27385  | 61114032 | 61114232 |
| 9 | 61220173 | 61266305 + | NM_001083927 | Tle3          | 5469   | 61225642 | 61225842 |
| 9 | 61220173 | 61266305 + | NM_001083927 | Tle3          | 33792  | 61253965 | 61254165 |
| 9 | 61220173 | 61266305 + | NM_001083927 | Tle3          | 26740  | 61246913 | 61247113 |
| 9 | 61220173 | 61266305 + | NM_001083928 | Tle3          | 5469   | 61225642 | 61225842 |
| 9 | 61220173 | 61266305 + | NM_001083928 | Tle3          | 33792  | 61253965 | 61254165 |
| 9 | 61220173 | 61266305 + | NM_001083928 | Tle3          | 26740  | 61246913 | 61247113 |
| 9 | 61220173 | 61266305 + | NM_009389    | Tle3          | 5469   | 61225642 | 61225842 |
| 9 | 61220173 | 61266305 + | NM_009389    | Tle3          | 33792  | 61253965 | 61254165 |
| 9 | 61220173 | 61266305 + | NM_009389    | Tle3          | 26740  | 61246913 | 61247113 |
| 9 | 61765085 | 61794607 - | NM_024245    | Kif23         | 523    | 61793884 | 61794084 |
| 9 | 61801545 | 61874598 - | NM_028748    | Paqr5         | 7827   | 61866571 | 61866771 |
| 9 | 61801545 | 61874598 - | NM_028748    | Paqr5         | 19480  | 61854918 | 61855118 |
| 9 | 62267299 | 62384852 - | NM_175484    | Coro2b        | 42143  | 62342509 | 62342709 |
| 9 | 62727884 | 62828687 - | NM_019663    | Pias1         | 45875  | 62782612 | 62782812 |
| 9 | 63269256 | 63450301 - | NM_001311098 | Iqch          | 69509  | 63380592 | 63380792 |
| 9 | 63269256 | 63450301 - | NM_030068    | Iqch          | 69509  | 63380592 | 63380792 |
| 9 | 63450462 | 63489697 + | NM_025857    | Aagab         | 11068  | 63461530 | 63461730 |
| 9 | 63494574 | 63605802 - | NM_016769    | Smad3         | 94880  | 63510722 | 63510922 |

|   |          |            |              |               |        |          |          |
|---|----------|------------|--------------|---------------|--------|----------|----------|
| 9 | 63494574 | 63605802 - | NM_016769    | Smad3         | 12005  | 63593597 | 63593797 |
| 9 | 63494574 | 63605802 - | NM_016769    | Smad3         | 30632  | 63574970 | 63575170 |
| 9 | 63494574 | 63605802 - | NM_016769    | Smad3         | 41801  | 63563801 | 63564001 |
| 9 | 63800883 | 63869867 - | NM_008542    | Smad6         | 32075  | 63837592 | 63837792 |
| 9 | 63800883 | 63869867 - | NM_008542    | Smad6         | 3861   | 63865806 | 63866006 |
| 9 | 63886272 | 63889273 - | NR_040726    | 1700055C04Rik | -9191  | 63898464 | 63898664 |
| 9 | 63897636 | 63901908 + | NR_040713    | 1110036E04Rik | 828    | 63898464 | 63898664 |
| 9 | 63984951 | 64020739 - | NM_026507    | Zwilch        | -208   | 64020947 | 64021147 |
| 9 | 63984951 | 64020739 - | NM_026507    | Zwilch        | 14939  | 64005600 | 64005800 |
| 9 | 64021194 | 64026370 + | NM_024212    | Rpl4          | -47    | 64020947 | 64021147 |
| 9 | 64023239 | 64023330 + | NR_028548    | Snord16a      | -2092  | 64020947 | 64021147 |
| 9 | 64027104 | 64030496 + | NM_183316    | Snapc5        | -5957  | 64020947 | 64021147 |
| 9 | 64033600 | 64101413 - | NM_008927    | Map2k1        | 53128  | 64048085 | 64048285 |
| 9 | 64033600 | 64101413 - | NM_008927    | Map2k1        | -1840  | 64103253 | 64103453 |
| 9 | 64033600 | 64101413 - | NM_008927    | Map2k1        | 2202   | 64099011 | 64099211 |
| 9 | 64233433 | 64557013 + | NM_001134399 | Megf11        | 315259 | 64548692 | 64548892 |
| 9 | 64233433 | 64557013 + | NM_001134399 | Megf11        | 208936 | 64442369 | 64442569 |
| 9 | 64233433 | 64557013 + | NM_001134399 | Megf11        | 282116 | 64515549 | 64515749 |
| 9 | 64233433 | 64557013 + | NM_001134399 | Megf11        | 258626 | 64492059 | 64492259 |
| 9 | 64233433 | 64557013 + | NM_001134399 | Megf11        | 95137  | 64328570 | 64328770 |
| 9 | 64233433 | 64548783 + | NM_172522    | Megf11        | 315259 | 64548692 | 64548892 |
| 9 | 64233433 | 64548783 + | NM_172522    | Megf11        | 208936 | 64442369 | 64442569 |
| 9 | 64233433 | 64548783 + | NM_172522    | Megf11        | 282116 | 64515549 | 64515749 |
| 9 | 64233433 | 64548783 + | NM_172522    | Megf11        | 258626 | 64492059 | 64492259 |
| 9 | 64233433 | 64548783 + | NM_172522    | Megf11        | 95137  | 64328570 | 64328770 |
| 9 | 64770668 | 64799415 - | NM_144813    | Slc24a1       | 16872  | 64782343 | 64782543 |
| 9 | 64880265 | 64930459 + | NM_028906    | Dpp8          | 331    | 64880596 | 64880796 |
| 9 | 65062497 | 65087027 + | NM_177460    | Parp16        | 3113   | 65065610 | 65065810 |
| 9 | 65062497 | 65087027 + | NM_177460    | Parp16        | 1149   | 65063646 | 65063846 |
| 9 | 65236491 | 65239460 - | NM_028974    | Kbtbd13       | -1283  | 65240743 | 65240943 |

|   |          |            |              |         |        |          |          |
|---|----------|------------|--------------|---------|--------|----------|----------|
| 9 | 65246295 | 65260515 + | NM_001033158 | Rasl12  | -5352  | 65240743 | 65240943 |
| 9 | 65246295 | 65262661 + | NM_001162923 | Rasl12  | -5352  | 65240743 | 65240943 |
| 9 | 65260560 | 65270581 - | NM_178933    | Slc51b  | -3722  | 65274303 | 65274503 |
| 9 | 65283589 | 65300862 + | NM_027134    | Mtfmt   | -9086  | 65274303 | 65274503 |
| 9 | 65539390 | 65675372 - | NM_172536    | Zfp609  | -250   | 65675622 | 65675822 |
| 9 | 65912983 | 65917539 - | NM_001025612 | Snx22   | 58     | 65917281 | 65917481 |
| 9 | 65935934 | 65972694 - | NM_019727    | Snx1    | 32349  | 65940145 | 65940345 |
| 9 | 66006033 | 66120050 + | NM_010019    | Dapk2   | 75438  | 66081471 | 66081671 |
| 9 | 66006033 | 66120050 + | NM_010019    | Dapk2   | 44395  | 66050428 | 66050628 |
| 9 | 66006033 | 66120050 + | NM_010019    | Dapk2   | 55203  | 66061236 | 66061436 |
| 9 | 66006033 | 66120050 + | NM_010019    | Dapk2   | 48673  | 66054706 | 66054906 |
| 9 | 66006033 | 66120050 + | NM_010019    | Dapk2   | 42463  | 66048496 | 66048696 |
| 9 | 66006033 | 66120050 + | NM_010019    | Dapk2   | 17152  | 66023185 | 66023385 |
| 9 | 66362446 | 66440923 - | NM_001302116 | Usp3    | 66021  | 66374702 | 66374902 |
| 9 | 66362446 | 66440923 - | NM_001302116 | Usp3    | 17004  | 66423719 | 66423919 |
| 9 | 66362446 | 66440923 - | NM_001302122 | Usp3    | 66021  | 66374702 | 66374902 |
| 9 | 66362446 | 66440923 - | NM_001302122 | Usp3    | 17004  | 66423719 | 66423919 |
| 9 | 66362446 | 66440923 - | NM_144937    | Usp3    | 66021  | 66374702 | 66374902 |
| 9 | 66362446 | 66440923 - | NM_144937    | Usp3    | 17004  | 66423719 | 66423919 |
| 9 | 66623294 | 66643231 - | NM_177583    | Aph1b   | 2731   | 66640300 | 66640500 |
| 9 | 66691471 | 66767513 - | NM_173413    | Rab8b   | 0      | 66767313 | 66767513 |
| 9 | 66870400 | 66897021 - | NM_001164249 | Tpm1    | 24002  | 66872819 | 66873019 |
| 9 | 66870400 | 66897021 - | NM_001164250 | Tpm1    | 24002  | 66872819 | 66873019 |
| 9 | 66870400 | 66891679 - | NM_001164252 | Tpm1    | 18660  | 66872819 | 66873019 |
| 9 | 66870400 | 66891679 - | NM_001164253 | Tpm1    | 18660  | 66872819 | 66873019 |
| 9 | 66870400 | 66897021 - | NM_024427    | Tpm1    | 24002  | 66872819 | 66873019 |
| 9 | 66871649 | 66897021 - | NM_001164255 | Tpm1    | 24002  | 66872819 | 66873019 |
| 9 | 66871649 | 66891679 - | NM_001164256 | Tpm1    | 18660  | 66872819 | 66873019 |
| 9 | 66981368 | 67011596 + | NR_045748    | Gm19299 | 17389  | 66998757 | 66998957 |
| 9 | 67064892 | 67407511 - | NM_001081242 | Tln2    | 300099 | 67107212 | 67107412 |

|   |          |            |              |               |        |          |          |
|---|----------|------------|--------------|---------------|--------|----------|----------|
| 9 | 67064892 | 67407511 - | NM_001081242 | Tln2          | 268689 | 67138622 | 67138822 |
| 9 | 67064892 | 67407511 - | NM_001081242 | Tln2          | 298453 | 67108858 | 67109058 |
| 9 | 69245805 | 69280882 + | NM_145618    | Ice2          | -1372  | 69244233 | 69244433 |
| 9 | 69301490 | 69339593 + | NM_007585    | Anxa2         | 766    | 69302256 | 69302456 |
| 9 | 69301490 | 69339593 + | NM_007585    | Anxa2         | 15237  | 69316727 | 69316927 |
| 9 | 69301490 | 69339593 + | NM_007585    | Anxa2         | 5511   | 69307001 | 69307201 |
| 9 | 69304751 | 69304839 + | NR_037296    | Mir3109       | -2295  | 69302256 | 69302456 |
| 9 | 69304751 | 69304839 + | NR_037296    | Mir3109       | 2250   | 69307001 | 69307201 |
| 9 | 69605517 | 69608748 - | NM_022378    | Foxb1         | -8660  | 69617408 | 69617608 |
| 9 | 69608953 | 69678007 + | NR_040765    | B230323A14Rik | 8455   | 69617408 | 69617608 |
| 9 | 69860355 | 69870674 + | NM_001039519 | Gtf2a2        | 6919   | 69867274 | 69867474 |
| 9 | 69860355 | 69870674 + | NM_001039519 | Gtf2a2        | 9622   | 69869977 | 69870177 |
| 9 | 69860355 | 69870674 + | NM_001282083 | Gtf2a2        | 6919   | 69867274 | 69867474 |
| 9 | 69860355 | 69870674 + | NM_001282083 | Gtf2a2        | 9622   | 69869977 | 69870177 |
| 9 | 69860355 | 69870674 + | NM_001282084 | Gtf2a2        | 6919   | 69867274 | 69867474 |
| 9 | 69860355 | 69870674 + | NM_001282084 | Gtf2a2        | 9622   | 69869977 | 69870177 |
| 9 | 69860355 | 69870674 + | NR_104093    | Gtf2a2        | 6919   | 69867274 | 69867474 |
| 9 | 69860355 | 69870674 + | NR_104093    | Gtf2a2        | 9622   | 69869977 | 69870177 |
| 9 | 69879303 | 69885896 - | NM_028087    | Gcnt3         | -8255  | 69894151 | 69894351 |
| 9 | 69879303 | 69885896 - | NM_028087    | Gcnt3         | 1231   | 69884465 | 69884665 |
| 9 | 70055157 | 70247875 + | NM_181072    | Myo1e         | 67760  | 70122917 | 70123117 |
| 9 | 70055157 | 70247875 + | NM_181072    | Myo1e         | 120946 | 70176103 | 70176303 |
| 9 | 70055157 | 70247875 + | NM_181072    | Myo1e         | 110212 | 70165369 | 70165569 |
| 9 | 70055157 | 70247875 + | NM_181072    | Myo1e         | 69816  | 70124973 | 70125173 |
| 9 | 70055157 | 70247875 + | NM_181072    | Myo1e         | 63693  | 70118850 | 70119050 |
| 9 | 70055157 | 70247875 + | NM_181072    | Myo1e         | -4244  | 70050713 | 70050913 |
| 9 | 70390585 | 70439880 + | NM_026337    | Sltm          | -9175  | 70381210 | 70381410 |
| 9 | 70390677 | 70440040 + | NM_025690    | Sltm          | -9267  | 70381210 | 70381410 |
| 9 | 70526808 | 70628037 + | NM_007399    | Adam10        | 91540  | 70618348 | 70618548 |
| 9 | 70645935 | 70782616 - | NM_008280    | Lipc          | 128472 | 70653944 | 70654144 |

|   |          |            |              |               |        |          |          |
|---|----------|------------|--------------|---------------|--------|----------|----------|
| 9 | 70645935 | 70782616 - | NM_008280    | Lipc          | 7665   | 70774751 | 70774951 |
| 9 | 70645935 | 70782616 - | NM_008280    | Lipc          | 45932  | 70736484 | 70736684 |
| 9 | 70958466 | 71010441 - | NM_001271843 | Aqp9          | 24847  | 70985394 | 70985594 |
| 9 | 70958466 | 71011097 - | NM_022026    | Aqp9          | 25503  | 70985394 | 70985594 |
| 9 | 70958466 | 71011097 - | NR_073483    | Aqp9          | 25503  | 70985394 | 70985594 |
| 9 | 71016583 | 71055930 + | NR_110517    | Gm32511       | 17124  | 71033707 | 71033907 |
| 9 | 71352154 | 71440168 - | NM_001033208 | Myzap         | 2303   | 71437665 | 71437865 |
| 9 | 71352154 | 71440168 - | NM_001033208 | Myzap         | 7178   | 71432790 | 71432990 |
| 9 | 71352154 | 71440168 - | NM_001033208 | Myzap         | 5519   | 71434449 | 71434649 |
| 9 | 71692059 | 71959009 - | NM_001253862 | Tcf12         | 108349 | 71850460 | 71850660 |
| 9 | 71692059 | 71959627 - | NM_001253865 | Tcf12         | 108967 | 71850460 | 71850660 |
| 9 | 71692059 | 71959627 - | NM_011544    | Tcf12         | 108967 | 71850460 | 71850660 |
| 9 | 72366057 | 72379666 - | NR_045735    | 4930509E16Rik | -5035  | 72384701 | 72384901 |
| 9 | 72380047 | 72470757 + | NM_001033536 | Rfx7          | 4654   | 72384701 | 72384901 |
| 9 | 74800860 | 74880276 + | NM_001113283 | Fam214a       | 71206  | 74872066 | 74872266 |
| 9 | 74823918 | 74880276 + | NM_153584    | Fam214a       | 48148  | 74872066 | 74872266 |
| 9 | 75079821 | 75153258 + | NM_001081322 | Myo5c         | 31475  | 75111296 | 75111496 |
| 9 | 75079821 | 75153258 + | NM_001081322 | Myo5c         | 16554  | 75096375 | 75096575 |
| 9 | 75234589 | 75257824 - | NM_015806    | Mapk6         | -246   | 75258070 | 75258270 |
| 9 | 75234589 | 75257824 - | NM_015806    | Mapk6         | 8945   | 75248679 | 75248879 |
| 9 | 75234589 | 75257167 - | NM_027418    | Mapk6         | -903   | 75258070 | 75258270 |
| 9 | 75234589 | 75257167 - | NM_027418    | Mapk6         | 8288   | 75248679 | 75248879 |
| 9 | 75257991 | 75263345 + | NR_040719    | 4933433G15Rik | 79     | 75258070 | 75258270 |
| 9 | 75257991 | 75263345 + | NR_040719    | 4933433G15Rik | -9112  | 75248679 | 75248879 |
| 9 | 75289331 | 75314240 + | NM_001039522 | Leo1          | -3617  | 75285514 | 75285714 |
| 9 | 75345591 | 75407465 - | NM_016963    | Tmod3         | 12216  | 75395049 | 75395249 |
| 9 | 75345591 | 75407465 - | NM_016963    | Tmod3         | -4073  | 75411538 | 75411738 |
| 9 | 75345591 | 75407465 - | NM_016963    | Tmod3         | 572    | 75406693 | 75406893 |
| 9 | 75345591 | 75407465 - | NM_016963    | Tmod3         | 29689  | 75377576 | 75377776 |
| 9 | 75345591 | 75407465 - | NM_016963    | Tmod3         | 31899  | 75375366 | 75375566 |

|   |          |            |              |        |       |          |          |
|---|----------|------------|--------------|--------|-------|----------|----------|
| 9 | 76338512 | 76393612 - | NM_001045518 | Fam83b | 1695  | 76391717 | 76391917 |
| 9 | 76338512 | 76393612 - | NM_001045518 | Fam83b | 19031 | 76374381 | 76374581 |
| 9 | 76338512 | 76393612 - | NM_001045518 | Fam83b | 7606  | 76385806 | 76386006 |
| 9 | 76338512 | 76393612 - | NM_001045518 | Fam83b | 16848 | 76376564 | 76376764 |
| 9 | 76338512 | 76393612 - | NM_001045518 | Fam83b | 23462 | 76369950 | 76370150 |
| 9 | 76338512 | 76393612 - | NM_001045518 | Fam83b | 22407 | 76371005 | 76371205 |
| 9 | 76338512 | 76393612 - | NM_001045518 | Fam83b | 40880 | 76352532 | 76352732 |
| 9 | 76799505 | 76893589 - | NM_012033    | Tinag  | 205   | 76893184 | 76893384 |
| 9 | 76799505 | 76893589 - | NM_012033    | Tinag  | 37588 | 76855801 | 76856001 |
| 9 | 77278630 | 77392660 - | NM_001146048 | Lrrc1  | 20789 | 77371671 | 77371871 |
| 9 | 77278630 | 77392660 - | NM_001146048 | Lrrc1  | 785   | 77391675 | 77391875 |
| 9 | 77278630 | 77392660 - | NM_001146048 | Lrrc1  | -6552 | 77399212 | 77399412 |
| 9 | 77278630 | 77392660 - | NM_001146048 | Lrrc1  | 1368  | 77391092 | 77391292 |
| 9 | 77278630 | 77392660 - | NM_001146048 | Lrrc1  | 15957 | 77376503 | 77376703 |
| 9 | 77278630 | 77392660 - | NM_001146048 | Lrrc1  | 81525 | 77310935 | 77311135 |
| 9 | 77278630 | 77392660 - | NM_001146048 | Lrrc1  | 29252 | 77363208 | 77363408 |
| 9 | 77278630 | 77392660 - | NM_001146048 | Lrrc1  | 40977 | 77351483 | 77351683 |
| 9 | 77278630 | 77391867 - | NM_172528    | Lrrc1  | 19996 | 77371671 | 77371871 |
| 9 | 77278630 | 77391867 - | NM_172528    | Lrrc1  | 0     | 77391675 | 77391875 |
| 9 | 77278630 | 77391867 - | NM_172528    | Lrrc1  | -7345 | 77399212 | 77399412 |
| 9 | 77278630 | 77391867 - | NM_172528    | Lrrc1  | 575   | 77391092 | 77391292 |
| 9 | 77278630 | 77391867 - | NM_172528    | Lrrc1  | 15164 | 77376503 | 77376703 |
| 9 | 77278630 | 77391867 - | NM_172528    | Lrrc1  | 80732 | 77310935 | 77311135 |
| 9 | 77278630 | 77391867 - | NM_172528    | Lrrc1  | 28459 | 77363208 | 77363408 |
| 9 | 77278630 | 77391867 - | NM_172528    | Lrrc1  | 40184 | 77351483 | 77351683 |
| 9 | 77602342 | 77642297 + | NM_010295    | Gclc   | 546   | 77602888 | 77603088 |
| 9 | 77602342 | 77642297 + | NM_010295    | Gclc   | 22332 | 77624674 | 77624874 |
| 9 | 77765172 | 77832327 + | NM_134255    | Elovl5 | 4206  | 77769378 | 77769578 |
| 9 | 77765172 | 77832327 + | NM_134255    | Elovl5 | 776   | 77765948 | 77766148 |
| 9 | 77765172 | 77832327 + | NM_134255    | Elovl5 | -6862 | 77758110 | 77758310 |

|   |          |            |              |         |       |          |          |
|---|----------|------------|--------------|---------|-------|----------|----------|
| 9 | 77929306 | 77956873 - | NM_001081490 | Fbxo9   | -5919 | 77962792 | 77962992 |
| 9 | 77929306 | 77956873 - | NM_001081490 | Fbxo9   | -8786 | 77965659 | 77965859 |
| 9 | 77929306 | 77956873 - | NM_001081490 | Fbxo9   | 3801  | 77952872 | 77953072 |
| 9 | 77929306 | 77956464 - | NM_023605    | Fbxo9   | -6328 | 77962792 | 77962992 |
| 9 | 77929306 | 77956464 - | NM_023605    | Fbxo9   | -9195 | 77965659 | 77965859 |
| 9 | 77929306 | 77956464 - | NM_023605    | Fbxo9   | 3392  | 77952872 | 77953072 |
| 9 | 77956999 | 78019917 + | NM_001163780 | Ick     | 5793  | 77962792 | 77962992 |
| 9 | 77956999 | 78019917 + | NM_001163780 | Ick     | 14265 | 77971264 | 77971464 |
| 9 | 77956999 | 78019917 + | NM_001163780 | Ick     | 8660  | 77965659 | 77965859 |
| 9 | 77956999 | 78019917 + | NM_001163780 | Ick     | -3927 | 77952872 | 77953072 |
| 9 | 77961045 | 78019917 + | NM_019987    | Ick     | 1747  | 77962792 | 77962992 |
| 9 | 77961045 | 78019917 + | NM_019987    | Ick     | 10219 | 77971264 | 77971464 |
| 9 | 77961045 | 78019917 + | NM_019987    | Ick     | 4614  | 77965659 | 77965859 |
| 9 | 77961045 | 78019917 + | NM_019987    | Ick     | -7973 | 77952872 | 77953072 |
| 9 | 78078476 | 78090491 + | NM_008181    | Gsta1   | -955  | 78077321 | 78077521 |
| 9 | 78104936 | 78116974 + | NM_001243092 | Gm3776  | -910  | 78103826 | 78104026 |
| 9 | 78384294 | 78435853 - | NM_001276452 | Slc17a5 | 7976  | 78427677 | 78427877 |
| 9 | 78384294 | 78435853 - | NM_172773    | Slc17a5 | 7976  | 78427677 | 78427877 |
| 9 | 82759766 | 82869097 - | NM_001081216 | Phip    | -893  | 82869990 | 82870190 |
| 9 | 83728296 | 83763101 + | NM_001110265 | Ttk     | 671   | 83728967 | 83729167 |
| 9 | 83728296 | 83765998 + | NM_001284272 | Ttk     | 671   | 83728967 | 83729167 |
| 9 | 83728296 | 83765998 + | NM_009445    | Ttk     | 671   | 83728967 | 83729167 |
| 9 | 85214046 | 85220732 - | NM_001160378 | Fam46a  | 1383  | 85219149 | 85219349 |
| 9 | 85214046 | 85220758 - | NM_001160379 | Fam46a  | 1409  | 85219149 | 85219349 |
| 9 | 86446083 | 86465450 - | NM_001163746 | Pgm3    | -2176 | 86467626 | 86467826 |
| 9 | 86446083 | 86465450 - | NM_028352    | Pgm3    | -2176 | 86467626 | 86467826 |
| 9 | 86465595 | 86468507 + | NM_001145969 | Rwdd2a  | 2031  | 86467626 | 86467826 |
| 9 | 86465660 | 86468507 + | NM_001145968 | Rwdd2a  | 1966  | 86467626 | 86467826 |
| 9 | 86465660 | 86468507 + | NM_027100    | Rwdd2a  | 1966  | 86467626 | 86467826 |
| 9 | 86474970 | 86581207 - | NM_001198933 | Me1     | -8927 | 86590134 | 86590334 |



|   |          |            |              |               |        |          |          |
|---|----------|------------|--------------|---------------|--------|----------|----------|
| 9 | 86474970 | 86589948 - | NM_008615    | Me1           | -186   | 86590134 | 86590334 |
| 9 | 86589475 | 86595287 + | NR_045835    | A330041J22Rik | 659    | 86590134 | 86590334 |
| 9 | 86659230 | 86775233 - | NM_001277982 | Snap91        | 102980 | 86672053 | 86672253 |
| 9 | 86659230 | 86775285 - | NM_001277983 | Snap91        | 103032 | 86672053 | 86672253 |
| 9 | 86659230 | 86775285 - | NM_001277985 | Snap91        | 103032 | 86672053 | 86672253 |
| 9 | 86659230 | 86775285 - | NM_001277986 | Snap91        | 103032 | 86672053 | 86672253 |
| 9 | 86659230 | 86775285 - | NM_013669    | Snap91        | 103032 | 86672053 | 86672253 |
| 9 | 86659230 | 86775285 - | NR_102729    | Snap91        | 103032 | 86672053 | 86672253 |
| 9 | 88442858 | 88465925 + | NM_001142943 | Zfp949        | 5157   | 88448015 | 88448215 |
| 9 | 88442858 | 88465925 + | NM_001142943 | Zfp949        | 0      | 88442675 | 88442875 |
| 9 | 88442858 | 88465925 + | NM_001163061 | Zfp949        | 5157   | 88448015 | 88448215 |
| 9 | 88442858 | 88465925 + | NM_001163061 | Zfp949        | 0      | 88442675 | 88442875 |
| 9 | 89804613 | 89921818 + | NM_011245    | Rasgrf1       | 51433  | 89856046 | 89856246 |
| 9 | 89804613 | 89921818 + | NM_011245    | Rasgrf1       | 50780  | 89855393 | 89855593 |
| 9 | 90096887 | 90165608 - | NM_194334    | Tbc1d2b       | 469    | 90164939 | 90165139 |
| 9 | 90096887 | 90165608 - | NM_194334    | Tbc1d2b       | 9750   | 90155658 | 90155858 |
| 9 | 92170440 | 92192591 + | NM_001195084 | Plscr2        | 18678  | 92189118 | 92189318 |
| 9 | 92170440 | 92192591 + | NM_008880    | Plscr2        | 18678  | 92189118 | 92189318 |
| 9 | 92204215 | 92252715 + | NM_001033184 | 1700057G04Rik | 27748  | 92231963 | 92232163 |
| 9 | 92204215 | 92252715 + | NM_001033184 | 1700057G04Rik | 29565  | 92233780 | 92233980 |
| 9 | 94570311 | 95130872 + | NM_177909    | Slc9a9        | 440027 | 95010338 | 95010538 |
| 9 | 95357313 | 95412416 - | NM_001114977 | U2surp        | 52     | 95412164 | 95412364 |
| 9 | 95357313 | 95412416 - | NM_001114977 | U2surp        | -858   | 95413274 | 95413474 |
| 9 | 95357313 | 95412416 - | NM_001114977 | U2surp        | 958    | 95411258 | 95411458 |
| 9 | 95357313 | 95412416 - | NM_026476    | U2surp        | 52     | 95412164 | 95412364 |
| 9 | 95357313 | 95412416 - | NM_026476    | U2surp        | -858   | 95413274 | 95413474 |
| 9 | 95357313 | 95412416 - | NM_026476    | U2surp        | 958    | 95411258 | 95411458 |
| 9 | 95653061 | 95745699 - | NM_001033210 | Pls1          | 16633  | 95728866 | 95729066 |
| 9 | 95653061 | 95745699 - | NM_001033210 | Pls1          | 4201   | 95741298 | 95741498 |
| 9 | 95653061 | 95745699 - | NM_001033210 | Pls1          | 8428   | 95737071 | 95737271 |

|   |          |            |              |          |        |          |          |
|---|----------|------------|--------------|----------|--------|----------|----------|
| 9 | 95653061 | 95745699 - | NM_001033210 | Pls1     | 11129  | 95734370 | 95734570 |
| 9 | 95653061 | 95745699 - | NM_001033210 | Pls1     | 29234  | 95716265 | 95716465 |
| 9 | 95653061 | 95745699 - | NM_001033210 | Pls1     | 23838  | 95721661 | 95721861 |
| 9 | 95653061 | 95745699 - | NM_001033210 | Pls1     | 25564  | 95719935 | 95720135 |
| 9 | 95653061 | 95745699 - | NM_001033210 | Pls1     | 29815  | 95715684 | 95715884 |
| 9 | 95653061 | 95745699 - | NM_001033210 | Pls1     | 39482  | 95706017 | 95706217 |
| 9 | 95758016 | 95852064 + | NM_019864    | Atr      | 56362  | 95814378 | 95814578 |
| 9 | 96019848 | 96083373 + | NM_177352    | Gk5      | 47955  | 96067803 | 96068003 |
| 9 | 96019848 | 96083373 + | NM_177352    | Gk5      | 15062  | 96034910 | 96035110 |
| 9 | 96096694 | 96224066 + | NM_001184706 | Tfdp2    | 47487  | 96144181 | 96144381 |
| 9 | 96096694 | 96224066 + | NM_001184706 | Tfdp2    | -9184  | 96087310 | 96087510 |
| 9 | 96096694 | 96224066 + | NM_001184708 | Tfdp2    | 47487  | 96144181 | 96144381 |
| 9 | 96096694 | 96224066 + | NM_001184708 | Tfdp2    | -9184  | 96087310 | 96087510 |
| 9 | 96096694 | 96224066 + | NM_178667    | Tfdp2    | 47487  | 96144181 | 96144381 |
| 9 | 96096694 | 96224066 + | NM_178667    | Tfdp2    | -9184  | 96087310 | 96087510 |
| 9 | 96439719 | 96531923 - | NM_053268    | Rasa2    | 34977  | 96496746 | 96496946 |
| 9 | 96439719 | 96531923 - | NM_053268    | Rasa2    | -7052  | 96538975 | 96539175 |
| 9 | 96439719 | 96531923 - | NM_053268    | Rasa2    | 3589   | 96528134 | 96528334 |
| 9 | 96439719 | 96531923 - | NM_053268    | Rasa2    | 57954  | 96473769 | 96473969 |
| 9 | 96723762 | 96789894 - | NM_001289645 | Pxylp1   | 261    | 96789433 | 96789633 |
| 9 | 96723762 | 96789894 - | NM_001289646 | Pxylp1   | 261    | 96789433 | 96789633 |
| 9 | 96723762 | 96789894 - | NM_001289647 | Pxylp1   | 261    | 96789433 | 96789633 |
| 9 | 96723762 | 96789894 - | NM_153420    | Pxylp1   | 261    | 96789433 | 96789633 |
| 9 | 96843901 | 96918775 - | NM_145134    | Spsb4    | 50353  | 96868222 | 96868422 |
| 9 | 96843901 | 96918775 - | NM_145134    | Spsb4    | 1176   | 96917399 | 96917599 |
| 9 | 96977430 | 97011461 - | NM_138756    | Slc25a36 | 29228  | 96982033 | 96982233 |
| 9 | 96977430 | 97011461 - | NM_138756    | Slc25a36 | -1205  | 97012666 | 97012866 |
| 9 | 96977430 | 97011461 - | NM_138756    | Slc25a36 | 28681  | 96982580 | 96982780 |
| 9 | 97344814 | 97933587 - | NM_022319    | Clstn2   | 252777 | 97680610 | 97680810 |
| 9 | 97344814 | 97933587 - | NM_022319    | Clstn2   | 252135 | 97681252 | 97681452 |

|   |           |             |              |               |       |           |           |
|---|-----------|-------------|--------------|---------------|-------|-----------|-----------|
| 9 | 98197002  | 98311848 +  | NM_144533    | Nmnat3        | 16468 | 98213470  | 98213670  |
| 9 | 98197002  | 98311848 +  | NM_144533    | Nmnat3        | 55849 | 98252851  | 98253051  |
| 9 | 98197002  | 98311848 +  | NM_144533    | Nmnat3        | 36882 | 98233884  | 98234084  |
| 9 | 98197002  | 98311848 +  | NM_144533    | Nmnat3        | 3027  | 98200029  | 98200229  |
| 9 | 98390956  | 98410191 +  | NM_009034    | Rbp2          | 4350  | 98395306  | 98395506  |
| 9 | 98390956  | 98410191 +  | NM_009034    | Rbp2          | 1220  | 98392176  | 98392376  |
| 9 | 98390956  | 98410191 +  | NM_009034    | Rbp2          | 3852  | 98394808  | 98395008  |
| 9 | 98390956  | 98410191 +  | NM_009034    | Rbp2          | 1736  | 98392692  | 98392892  |
| 9 | 98390956  | 98410191 +  | NM_009034    | Rbp2          | -659  | 98390097  | 98390297  |
| 9 | 98390956  | 98410191 +  | NM_009034    | Rbp2          | 0     | 98390835  | 98391035  |
| 9 | 98462879  | 98464031 -  | NR_029444    | 4930579K19Rik | -4828 | 98468859  | 98469059  |
| 9 | 98464150  | 98488795 +  | NM_015827    | Copb2         | 4709  | 98468859  | 98469059  |
| 9 | 98886792  | 98902439 +  | NM_001122851 | Faim          | 954   | 98887746  | 98887946  |
| 9 | 98886792  | 98902439 +  | NM_011810    | Faim          | 954   | 98887746  | 98887946  |
| 9 | 98907384  | 98936110 -  | NM_001080776 | Gm1123        | 3435  | 98932475  | 98932675  |
| 9 | 99129795  | 99137659 -  | NM_001244762 | Faiml         | -5641 | 99143300  | 99143500  |
| 9 | 99129795  | 99137659 -  | NM_001244762 | Faiml         | -1850 | 99139509  | 99139709  |
| 9 | 99143887  | 99200823 +  | NM_023873    | Cep70         | -387  | 99143300  | 99143500  |
| 9 | 99143887  | 99200823 +  | NM_023873    | Cep70         | -4178 | 99139509  | 99139709  |
| 9 | 99356662  | 99380319 +  | NM_001165957 | Nme9          | 13699 | 99370361  | 99370561  |
| 9 | 99356662  | 99380319 +  | NM_001165957 | Nme9          | 14163 | 99370825  | 99371025  |
| 9 | 99370840  | 99375171 +  | NR_028123    | 1600029I14Rik | -279  | 99370361  | 99370561  |
| 9 | 99370840  | 99375171 +  | NR_028123    | 1600029I14Rik | 0     | 99370825  | 99371025  |
| 9 | 100358138 | 100386893 - | NM_001033543 | Il20rb        | 19618 | 100367075 | 100367275 |
| 9 | 100882451 | 100935304 - | NM_001311149 | Pccb          | 43967 | 100891137 | 100891337 |
| 9 | 100882451 | 100935304 - | NM_001311149 | Pccb          | 48119 | 100886985 | 100887185 |
| 9 | 100882451 | 100935304 - | NM_025835    | Pccb          | 43967 | 100891137 | 100891337 |
| 9 | 100882451 | 100935304 - | NM_025835    | Pccb          | 48119 | 100886985 | 100887185 |
| 9 | 102408468 | 102448570 + | NM_024291    | Ky            | -3585 | 102404683 | 102404883 |
| 9 | 102408468 | 102448570 + | NM_024291    | Ky            | -4371 | 102403897 | 102404097 |

|   |           |             |              |          |       |           |           |
|---|-----------|-------------|--------------|----------|-------|-----------|-----------|
| 9 | 102488908 | 102528455 - | NM_001081122 | Cep63    | 30106 | 102498149 | 102498349 |
| 9 | 102488908 | 102528455 - | NM_001301689 | Cep63    | 30106 | 102498149 | 102498349 |
| 9 | 102737250 | 102810638 + | NM_001042607 | Ryk      | 41545 | 102778795 | 102778995 |
| 9 | 102737250 | 102810638 + | NM_001042607 | Ryk      | 15275 | 102752525 | 102752725 |
| 9 | 102737250 | 102810638 + | NM_001284258 | Ryk      | 41545 | 102778795 | 102778995 |
| 9 | 102737250 | 102810638 + | NM_001284258 | Ryk      | 15275 | 102752525 | 102752725 |
| 9 | 102737250 | 102810638 + | NM_013649    | Ryk      | 41545 | 102778795 | 102778995 |
| 9 | 102737250 | 102810638 + | NM_013649    | Ryk      | 15275 | 102752525 | 102752725 |
| 9 | 102910819 | 102990180 + | NM_033314    | Slco2a1  | 30323 | 102941142 | 102941342 |
| 9 | 102910819 | 102990180 + | NM_033314    | Slco2a1  | 20654 | 102931473 | 102931673 |
| 9 | 104053927 | 104165261 - | NM_001163026 | Dnajc13  | -283  | 104165544 | 104165744 |
| 9 | 104053927 | 104165261 - | NM_001163026 | Dnajc13  | 64578 | 104100483 | 104100683 |
| 9 | 104190570 | 104240053 - | NM_207668    | Acpp     | 30731 | 104209122 | 104209322 |
| 9 | 104190570 | 104240053 - | NM_207668    | Acpp     | 41190 | 104198663 | 104198863 |
| 9 | 104201330 | 104240053 - | NM_019807    | Acpp     | 30731 | 104209122 | 104209322 |
| 9 | 104472118 | 104936875 + | NM_028719    | Cpne4    | 9891  | 104482009 | 104482209 |
| 9 | 105591747 | 105730416 - | NM_001102607 | Col6a6   | 39887 | 105690329 | 105690529 |
| 9 | 105676442 | 105711979 - | NM_172927    | Col6a6   | 21450 | 105690329 | 105690529 |
| 9 | 105892649 | 105999023 - | NM_026763    | Col6a4   | 49106 | 105949717 | 105949917 |
| 9 | 106135786 | 106150062 - | NM_001291835 | Alas1    | -6074 | 106156136 | 106156336 |
| 9 | 106135786 | 106150062 - | NM_001291835 | Alas1    | -2106 | 106152168 | 106152368 |
| 9 | 106135786 | 106150286 - | NM_020559    | Alas1    | -5850 | 106156136 | 106156336 |
| 9 | 106135786 | 106150286 - | NM_020559    | Alas1    | -1882 | 106152168 | 106152368 |
| 9 | 106183392 | 106252223 + | NM_027354    | Poc1a    | -8486 | 106174706 | 106174906 |
| 9 | 106366291 | 106368272 - | NM_001159652 | Gpr62    | -8491 | 106376763 | 106376963 |
| 9 | 106372653 | 106379281 - | NM_001311150 | Parp3    | 2318  | 106376763 | 106376963 |
| 9 | 106372653 | 106379281 - | NM_145619    | Parp3    | 2318  | 106376763 | 106376963 |
| 9 | 106379640 | 106387747 + | NM_145620    | Rrp9     | -2677 | 106376763 | 106376963 |
| 9 | 107157258 | 107192209 - | NM_178907    | Mapkapk3 | -6311 | 107198520 | 107198720 |
| 9 | 107199020 | 107204293 + | NM_009895    | Cish     | -300  | 107198520 | 107198720 |

|   |           |             |              |        |       |           |           |
|---|-----------|-------------|--------------|--------|-------|-----------|-----------|
| 9 | 107471494 | 107475110 + | NM_010489    | Hyal2  | 2287  | 107473781 | 107473981 |
| 9 | 107479283 | 107482465 + | NM_008317    | Hyal1  | -5302 | 107473781 | 107473981 |
| 9 | 107482501 | 107486380 + | NM_019750    | Nat6   | -8520 | 107473781 | 107473981 |
| 9 | 107483627 | 107489691 + | NM_178020    | Hyal3  | 6048  | 107489675 | 107489875 |
| 9 | 107483627 | 107489691 + | NM_178020    | Hyal3  | -9646 | 107473781 | 107473981 |
| 9 | 107490049 | 107495370 + | NM_025903    | lfrd2  | -174  | 107489675 | 107489875 |
| 9 | 107500005 | 107511573 - | NM_001042779 | Sema3b | 9693  | 107501680 | 107501880 |
| 9 | 107500005 | 107511573 - | NM_001042779 | Sema3b | 1306  | 107510067 | 107510267 |
| 9 | 107500005 | 107511573 - | NM_001042779 | Sema3b | 6590  | 107504783 | 107504983 |
| 9 | 107500005 | 107509424 - | NM_001291537 | Sema3b | 7544  | 107501680 | 107501880 |
| 9 | 107500005 | 107509424 - | NM_001291537 | Sema3b | -643  | 107510067 | 107510267 |
| 9 | 107500005 | 107509424 - | NM_001291537 | Sema3b | 4441  | 107504783 | 107504983 |
| 9 | 107500005 | 107509424 - | NM_001291538 | Sema3b | 7544  | 107501680 | 107501880 |
| 9 | 107500005 | 107509424 - | NM_001291538 | Sema3b | -643  | 107510067 | 107510267 |
| 9 | 107500005 | 107509424 - | NM_001291538 | Sema3b | 4441  | 107504783 | 107504983 |
| 9 | 107500005 | 107511573 - | NM_001291539 | Sema3b | 9693  | 107501680 | 107501880 |
| 9 | 107500005 | 107511573 - | NM_001291539 | Sema3b | 1306  | 107510067 | 107510267 |
| 9 | 107500005 | 107511573 - | NM_001291539 | Sema3b | 6590  | 107504783 | 107504983 |
| 9 | 107500005 | 107507734 - | NM_009153    | Sema3b | 5854  | 107501680 | 107501880 |
| 9 | 107500005 | 107507734 - | NM_009153    | Sema3b | -2333 | 107510067 | 107510267 |
| 9 | 107500005 | 107507734 - | NM_009153    | Sema3b | 2751  | 107504783 | 107504983 |
| 9 | 107500005 | 107507919 - | NR_111986    | Sema3b | 6039  | 107501680 | 107501880 |
| 9 | 107500005 | 107507919 - | NR_111986    | Sema3b | -2148 | 107510067 | 107510267 |
| 9 | 107500005 | 107507919 - | NR_111986    | Sema3b | 2936  | 107504783 | 107504983 |
| 9 | 107675891 | 107775151 - | NM_011251    | Rbm6   | 1234  | 107773717 | 107773917 |
| 9 | 107675891 | 107775151 - | NM_029169    | Rbm6   | 1234  | 107773717 | 107773917 |
| 9 | 107790460 | 107805471 + | NM_028369    | Mon1a  | 2215  | 107792675 | 107792875 |
| 9 | 107809220 | 107822715 + | NM_009074    | Mst1r  | 3749  | 107812969 | 107813169 |
| 9 | 107809220 | 107822715 + | NM_009074    | Mst1r  | 2034  | 107811254 | 107811454 |
| 9 | 107809220 | 107822715 + | NM_009074    | Mst1r  | 1608  | 107810828 | 107811028 |

|   |           |             |              |         |       |           |           |
|---|-----------|-------------|--------------|---------|-------|-----------|-----------|
| 9 | 107809220 | 107822715 + | NR_109782    | Mst1r   | 3749  | 107812969 | 107813169 |
| 9 | 107809220 | 107822715 + | NR_109782    | Mst1r   | 2034  | 107811254 | 107811454 |
| 9 | 107809220 | 107822715 + | NR_109782    | Mst1r   | 1608  | 107810828 | 107811028 |
| 9 | 107817334 | 107822715 + | NM_001287261 | Mst1r   | -4165 | 107812969 | 107813169 |
| 9 | 107817334 | 107822715 + | NM_001287261 | Mst1r   | -5880 | 107811254 | 107811454 |
| 9 | 107817334 | 107822715 + | NM_001287261 | Mst1r   | -6306 | 107810828 | 107811028 |
| 9 | 107830800 | 107834793 + | NM_026338    | Actl11  | 3166  | 107833966 | 107834166 |
| 9 | 107838251 | 107852023 + | NM_145621    | Camkv   | -4085 | 107833966 | 107834166 |
| 9 | 107853294 | 107874600 + | NM_011634    | Traip   | 20976 | 107874270 | 107874470 |
| 9 | 107877898 | 107886388 + | NM_023738    | Uba7    | 0     | 107877716 | 107877916 |
| 9 | 107877898 | 107886388 + | NM_023738    | Uba7    | -3428 | 107874270 | 107874470 |
| 9 | 107886555 | 107888248 - | NM_026597    | Fam212a | -583  | 107888831 | 107889031 |
| 9 | 107987745 | 107996812 - | NM_146226    | Apeh    | -593  | 107997405 | 107997605 |
| 9 | 108107192 | 108166147 - | NM_001276481 | Dag1    | -3972 | 108170119 | 108170319 |
| 9 | 108107192 | 108166147 - | NM_001276482 | Dag1    | -3972 | 108170119 | 108170319 |
| 9 | 108107192 | 108166290 - | NM_001276485 | Dag1    | -3829 | 108170119 | 108170319 |
| 9 | 108107192 | 108166290 - | NM_001276486 | Dag1    | -3829 | 108170119 | 108170319 |
| 9 | 108107192 | 108166147 - | NM_001276492 | Dag1    | -3972 | 108170119 | 108170319 |
| 9 | 108107192 | 108166147 - | NM_001276493 | Dag1    | -3972 | 108170119 | 108170319 |
| 9 | 108107192 | 108166290 - | NM_001276494 | Dag1    | -3829 | 108170119 | 108170319 |
| 9 | 108107192 | 108166147 - | NM_010017    | Dag1    | -3972 | 108170119 | 108170319 |
| 9 | 108208536 | 108240271 + | NM_016802    | Rhoa    | 15004 | 108223540 | 108223740 |
| 9 | 108250162 | 108294877 + | NM_001311157 | Usp4    | 30432 | 108280594 | 108280794 |
| 9 | 108250162 | 108294877 + | NM_001311157 | Usp4    | 30850 | 108281012 | 108281212 |
| 9 | 108250162 | 108294861 + | NM_011678    | Usp4    | 30432 | 108280594 | 108280794 |
| 9 | 108250162 | 108294861 + | NM_011678    | Usp4    | 30850 | 108281012 | 108281212 |
| 9 | 108382193 | 108392862 + | NM_008483    | Lamb2   | -852  | 108381141 | 108381341 |
| 9 | 108410336 | 108418273 + | NM_133794    | Qars    | 4264  | 108414600 | 108414800 |
| 9 | 108411810 | 108418273 + | NM_001168270 | Qars    | 2790  | 108414600 | 108414800 |
| 9 | 108419418 | 108462499 + | NM_001114119 | Qrich1  | -4618 | 108414600 | 108414800 |

|   |           |             |              |          |       |           |           |
|---|-----------|-------------|--------------|----------|-------|-----------|-----------|
| 9 | 108419418 | 108462499 + | NM_175143    | Qrich1   | -4618 | 108414600 | 108414800 |
| 9 | 108564429 | 108586973 + | NM_020520    | Slc25a20 | 660   | 108565089 | 108565289 |
| 9 | 108594474 | 108651843 + | NM_008924    | Prkar2a  | 3256  | 108597730 | 108597930 |
| 9 | 108756374 | 108815381 + | NM_134420    | Slc26a6  | 4842  | 108761216 | 108761416 |
| 9 | 108838661 | 108851687 + | NM_025407    | Uqcrc1   | -5568 | 108832893 | 108833093 |
| 9 | 108893947 | 108934740 + | NM_173019    | Pfkfb4   | 3584  | 108897531 | 108897731 |
| 9 | 108960446 | 108961766 - | NM_001012236 | Trex1    | -33   | 108961799 | 108961999 |
| 9 | 108960446 | 108962238 - | NM_011637    | Trex1    | 239   | 108961799 | 108961999 |
| 9 | 109778083 | 109796395 + | NM_007658    | Cdc25a   | 3873  | 109781956 | 109782156 |
| 9 | 109778083 | 109796395 + | NM_007658    | Cdc25a   | 4176  | 109782259 | 109782459 |
| 9 | 109778083 | 109796395 + | NM_007658    | Cdc25a   | -4127 | 109773756 | 109773956 |
| 9 | 109792147 | 109792215 + | NR_106057    | Mir7089  | -9991 | 109781956 | 109782156 |
| 9 | 109792147 | 109792215 + | NR_106057    | Mir7089  | -9688 | 109782259 | 109782459 |
| 9 | 109834278 | 109986459 + | NM_001205330 | Map4     | 54943 | 109889221 | 109889421 |
| 9 | 109834278 | 109908289 + | NM_001205331 | Map4     | 54943 | 109889221 | 109889421 |
| 9 | 109834278 | 109986459 + | NM_001205332 | Map4     | 54943 | 109889221 | 109889421 |
| 9 | 109834278 | 109986459 + | NM_008633    | Map4     | 54943 | 109889221 | 109889421 |
| 9 | 110183791 | 110183914 + | NR_105744    | Mir6236  | 0     | 110183641 | 110183841 |
| 9 | 110435101 | 110521138 + | NM_001081340 | Setd2    | -1176 | 110433725 | 110433925 |
| 9 | 110527293 | 110556666 - | NM_183276    | Nbeal2   | -7115 | 110563781 | 110563981 |
| 9 | 110527293 | 110556666 - | NM_183276    | Nbeal2   | -5377 | 110562043 | 110562243 |
| 9 | 110559007 | 110614098 + | NM_028312    | Ccdc12   | 29103 | 110588110 | 110588310 |
| 9 | 110559007 | 110614098 + | NM_028312    | Ccdc12   | 44571 | 110603578 | 110603778 |
| 9 | 110559007 | 110614098 + | NM_028312    | Ccdc12   | 4774  | 110563781 | 110563981 |
| 9 | 110559007 | 110614098 + | NM_028312    | Ccdc12   | 28091 | 110587098 | 110587298 |
| 9 | 110559007 | 110614098 + | NM_028312    | Ccdc12   | 12196 | 110571203 | 110571403 |
| 9 | 110559007 | 110614098 + | NM_028312    | Ccdc12   | 3036  | 110562043 | 110562243 |
| 9 | 110624589 | 110646191 - | NM_001083935 | Pth1r    | 10283 | 110635708 | 110635908 |
| 9 | 110624589 | 110645115 - | NM_001083936 | Pth1r    | 9207  | 110635708 | 110635908 |
| 9 | 110624589 | 110649650 - | NM_011199    | Pth1r    | 13742 | 110635708 | 110635908 |

|   |           |             |              |         |        |           |           |
|---|-----------|-------------|--------------|---------|--------|-----------|-----------|
| 9 | 110957338 | 110960023 - | NM_001302376 | Ccrl2   | 532    | 110959291 | 110959491 |
| 9 | 110957338 | 110960023 - | NM_001302376 | Ccrl2   | 94     | 110959729 | 110959929 |
| 9 | 110957338 | 110959749 - | NM_001302377 | Ccrl2   | 258    | 110959291 | 110959491 |
| 9 | 110957338 | 110959749 - | NM_001302377 | Ccrl2   | 0      | 110959729 | 110959929 |
| 9 | 110957338 | 110959775 - | NM_017466    | Ccrl2   | 284    | 110959291 | 110959491 |
| 9 | 110957338 | 110959775 - | NM_017466    | Ccrl2   | 0      | 110959729 | 110959929 |
| 9 | 111020615 | 111128173 + | NM_001164838 | Lrrfip2 | 65068  | 111085683 | 111085883 |
| 9 | 111020615 | 111128173 + | NM_001164838 | Lrrfip2 | 31085  | 111051700 | 111051900 |
| 9 | 111020615 | 111128173 + | NM_027742    | Lrrfip2 | 65068  | 111085683 | 111085883 |
| 9 | 111020615 | 111128173 + | NM_027742    | Lrrfip2 | 31085  | 111051700 | 111051900 |
| 9 | 111214243 | 111298280 + | NM_001164659 | Trank1  | 74035  | 111288278 | 111288478 |
| 9 | 111214243 | 111298280 + | NM_001164659 | Trank1  | 44595  | 111258838 | 111259038 |
| 9 | 111341585 | 111392116 + | NM_172928    | Dclk3   | 10893  | 111352478 | 111352678 |
| 9 | 111341585 | 111392116 + | NM_172928    | Dclk3   | 22346  | 111363931 | 111364131 |
| 9 | 113560862 | 113617378 - | NM_001164677 | Pdcd6ip | 54446  | 113562732 | 113562932 |
| 9 | 113560862 | 113617378 - | NM_001164677 | Pdcd6ip | 1376   | 113615802 | 113616002 |
| 9 | 113560862 | 113617378 - | NM_001164677 | Pdcd6ip | 10345  | 113606833 | 113607033 |
| 9 | 113560862 | 113617378 - | NM_001164678 | Pdcd6ip | 54446  | 113562732 | 113562932 |
| 9 | 113560862 | 113617378 - | NM_001164678 | Pdcd6ip | 1376   | 113615802 | 113616002 |
| 9 | 113560862 | 113617378 - | NM_001164678 | Pdcd6ip | 10345  | 113606833 | 113607033 |
| 9 | 113560862 | 113617378 - | NM_011052    | Pdcd6ip | 54446  | 113562732 | 113562932 |
| 9 | 113560862 | 113617378 - | NM_011052    | Pdcd6ip | 1376   | 113615802 | 113616002 |
| 9 | 113560862 | 113617378 - | NM_011052    | Pdcd6ip | 10345  | 113606833 | 113607033 |
| 9 | 113650591 | 113828816 + | NM_001114347 | Clasp2  | 114131 | 113764722 | 113764922 |
| 9 | 113650591 | 113828816 + | NM_001114347 | Clasp2  | 93937  | 113744528 | 113744728 |
| 9 | 113650591 | 113752022 + | NM_001286599 | Clasp2  | 93937  | 113744528 | 113744728 |
| 9 | 113702448 | 113752022 + | NM_001286603 | Clasp2  | 42080  | 113744528 | 113744728 |
| 9 | 113721704 | 113828816 + | NM_001081960 | Clasp2  | 43018  | 113764722 | 113764922 |
| 9 | 113721704 | 113828816 + | NM_001081960 | Clasp2  | 22824  | 113744528 | 113744728 |
| 9 | 113721704 | 113828816 + | NM_001286600 | Clasp2  | 43018  | 113764722 | 113764922 |



|   |           |             |              |               |        |           |           |
|---|-----------|-------------|--------------|---------------|--------|-----------|-----------|
| 9 | 113721704 | 113828816 + | NM_001286600 | Clasp2        | 22824  | 113744528 | 113744728 |
| 9 | 113721704 | 113828816 + | NM_001286601 | Clasp2        | 43018  | 113764722 | 113764922 |
| 9 | 113721704 | 113828816 + | NM_001286601 | Clasp2        | 22824  | 113744528 | 113744728 |
| 9 | 113721704 | 113828816 + | NM_001286602 | Clasp2        | 43018  | 113764722 | 113764922 |
| 9 | 113721704 | 113828816 + | NM_001286602 | Clasp2        | 22824  | 113744528 | 113744728 |
| 9 | 113721704 | 113828816 + | NM_029633    | Clasp2        | 43018  | 113764722 | 113764922 |
| 9 | 113721704 | 113828816 + | NM_029633    | Clasp2        | 22824  | 113744528 | 113744728 |
| 9 | 113966472 | 114007852 + | NM_001101510 | Susd5         | 11479  | 113977951 | 113978151 |
| 9 | 114284249 | 114299831 - | NM_019922    | Crtap         | 13267  | 114286364 | 114286564 |
| 9 | 114310196 | 114383498 + | NM_009752    | Glb1          | 1142   | 114311338 | 114311538 |
| 9 | 114310196 | 114383498 + | NR_108101    | Glb1          | 1142   | 114311338 | 114311538 |
| 9 | 114310196 | 114383498 + | NR_108102    | Glb1          | 1142   | 114311338 | 114311538 |
| 9 | 114310213 | 114320320 + | NM_001200002 | Tmppe         | 1125   | 114311338 | 114311538 |
| 9 | 114420391 | 114473488 - | NM_001042503 | Trim71        | 45677  | 114427611 | 114427811 |
| 9 | 114494992 | 114549319 - | NM_153585    | Cnot10        | -6785  | 114556104 | 114556304 |
| 9 | 114597949 | 114632896 + | NM_146229    | Dync1li1      | 19206  | 114617155 | 114617355 |
| 9 | 114698463 | 114753271 - | NM_027294    | Cmtm8         | 21710  | 114731361 | 114731561 |
| 9 | 114698463 | 114753271 - | NM_027294    | Cmtm8         | 35048  | 114718023 | 114718223 |
| 9 | 114808457 | 114843106 - | NM_175380    | Gpd1l         | -9947  | 114853053 | 114853253 |
| 9 | 114808457 | 114843106 - | NM_175380    | Gpd1l         | 19729  | 114823177 | 114823377 |
| 9 | 114976397 | 115141342 + | NM_148958    | Osbp10        | 84263  | 115060660 | 115060860 |
| 9 | 114976397 | 115141342 + | NM_148958    | Osbp10        | 83074  | 115059471 | 115059671 |
| 9 | 115245279 | 115251043 + | NR_040730    | 4930428G15Rik | 1205   | 115246484 | 115246684 |
| 9 | 115818573 | 115985295 + | NM_028638    | Gad1l         | 10618  | 115829191 | 115829391 |
| 9 | 117949640 | 117969603 + | NM_001048146 | Azi2          | 18660  | 117968300 | 117968500 |
| 9 | 117949640 | 117978913 + | NM_001286507 | Azi2          | 18660  | 117968300 | 117968500 |
| 9 | 117949640 | 117974215 + | NM_001286508 | Azi2          | 18660  | 117968300 | 117968500 |
| 9 | 117949640 | 117974215 + | NM_013727    | Azi2          | 18660  | 117968300 | 117968500 |
| 9 | 118415436 | 118491638 + | NM_018748    | Golga4        | 2012   | 118417448 | 118417648 |
| 9 | 118515827 | 118810122 + | NM_133721    | ltga9         | 199142 | 118714969 | 118715169 |

|   |           |             |              |               |        |           |           |
|---|-----------|-------------|--------------|---------------|--------|-----------|-----------|
| 9 | 118515827 | 118810122 + | NM_133721    | Itga9         | -5101  | 118510526 | 118510726 |
| 9 | 118620810 | 118810122 + | NM_001113514 | Itga9         | 94159  | 118714969 | 118715169 |
| 9 | 118835654 | 118953238 + | NM_133710    | Ctdspl        | 14573  | 118850227 | 118850427 |
| 9 | 118835654 | 118953238 + | NM_133710    | Ctdspl        | 58584  | 118894238 | 118894438 |
| 9 | 118980646 | 118997380 - | NM_001293648 | Plcd1         | 3917   | 118993263 | 118993463 |
| 9 | 118980646 | 119002621 - | NM_019676    | Plcd1         | 9158   | 118993263 | 118993463 |
| 9 | 118980646 | 119002621 - | NR_121571    | Plcd1         | 9158   | 118993263 | 118993463 |
| 9 | 119129609 | 119140811 - | NR_033303    | Slc22a13b-ps  | -307   | 119141118 | 119141318 |
| 9 | 119129609 | 119140811 - | NR_033303    | Slc22a13b-ps  | -2265  | 119143076 | 119143276 |
| 9 | 119245106 | 119249159 - | NM_010851    | Myd88         | -2678  | 119251837 | 119252037 |
| 9 | 119250412 | 119259414 + | NM_130864    | Acaa1a        | 1425   | 119251837 | 119252037 |
| 9 | 119266499 | 119302916 + | NM_001033209 | Xylb          | -937   | 119265362 | 119265562 |
| 9 | 119266499 | 119302916 + | NM_001033209 | Xylb          | 5932   | 119272431 | 119272631 |
| 9 | 119266499 | 119302916 + | NM_001199568 | Xylb          | -937   | 119265362 | 119265562 |
| 9 | 119266499 | 119302916 + | NM_001199568 | Xylb          | 5932   | 119272431 | 119272631 |
| 9 | 119311619 | 119342625 + | NM_007397    | Acvr2b        | 817    | 119312436 | 119312636 |
| 9 | 119880284 | 119893777 - | NM_153287    | Csrnp1        | 406    | 119893171 | 119893371 |
| 9 | 120213191 | 120383953 + | NM_144557    | Myrip         | 47203  | 120260394 | 120260594 |
| 9 | 120822892 | 120824369 - | NR_040742    | 1700020M21Rik | -5107  | 120829476 | 120829676 |
| 9 | 120842518 | 120869626 + | NM_007614    | Ctnnb1        | 18695  | 120861213 | 120861413 |
| 9 | 120842696 | 120869626 + | NM_001165902 | Ctnnb1        | 18517  | 120861213 | 120861413 |
| 9 | 120864204 | 120864266 + | NR_106058    | Mir7090       | -2791  | 120861213 | 120861413 |
| 9 | 120873572 | 121186291 - | NM_177589    | Ulk4          | 292387 | 120893704 | 120893904 |
| 9 | 121276076 | 121384037 + | NM_175114    | Trak1         | 47505  | 121323581 | 121323781 |
| 9 | 121276076 | 121384037 + | NM_175114    | Trak1         | 68332  | 121344408 | 121344608 |
| 9 | 121276076 | 121384037 + | NM_175114    | Trak1         | 89482  | 121365558 | 121365758 |
| 9 | 121276076 | 121384037 + | NM_175114    | Trak1         | 69535  | 121345611 | 121345811 |
| 9 | 121276076 | 121384037 + | NM_175114    | Trak1         | 65008  | 121341084 | 121341284 |
| 9 | 121276076 | 121384037 + | NM_175114    | Trak1         | 59518  | 121335594 | 121335794 |
| 9 | 121276076 | 121384037 + | NM_175114    | Trak1         | 7992   | 121284068 | 121284268 |

|   |           |             |              |               |        |           |           |
|---|-----------|-------------|--------------|---------------|--------|-----------|-----------|
| 9 | 121276076 | 121384037 + | NM_175114    | Trak1         | 38849  | 121314925 | 121315125 |
| 9 | 121276076 | 121384037 + | NM_175114    | Trak1         | 22983  | 121299059 | 121299259 |
| 9 | 121551834 | 121582073 + | NM_011703    | Vipr1         | 15526  | 121567360 | 121567560 |
| 9 | 121551834 | 121582073 + | NM_011703    | Vipr1         | 14445  | 121566279 | 121566479 |
| 9 | 122026384 | 122078821 + | NM_001164572 | Snrk          | 14870  | 122041254 | 122041454 |
| 9 | 122026384 | 122078821 + | NM_001164572 | Snrk          | 28915  | 122055299 | 122055499 |
| 9 | 122026384 | 122078821 + | NM_001164572 | Snrk          | 39639  | 122066023 | 122066223 |
| 9 | 122026384 | 122078821 + | NM_001164572 | Snrk          | 17837  | 122044221 | 122044421 |
| 9 | 122026384 | 122078821 + | NM_133741    | Snrk          | 14870  | 122041254 | 122041454 |
| 9 | 122026384 | 122078821 + | NM_133741    | Snrk          | 28915  | 122055299 | 122055499 |
| 9 | 122026384 | 122078821 + | NM_133741    | Snrk          | 39639  | 122066023 | 122066223 |
| 9 | 122026384 | 122078821 + | NM_133741    | Snrk          | 17837  | 122044221 | 122044421 |
| 9 | 122084992 | 122203542 - | NM_001271873 | Ano10         | 112213 | 122091129 | 122091329 |
| 9 | 122084992 | 122203542 - | NM_001271873 | Ano10         | 28321  | 122175021 | 122175221 |
| 9 | 122084992 | 122203542 - | NM_001271873 | Ano10         | 105398 | 122097944 | 122098144 |
| 9 | 122084992 | 122203542 - | NM_133979    | Ano10         | 112213 | 122091129 | 122091329 |
| 9 | 122084992 | 122203542 - | NM_133979    | Ano10         | 28321  | 122175021 | 122175221 |
| 9 | 122084992 | 122203542 - | NM_133979    | Ano10         | 105398 | 122097944 | 122098144 |
| 9 | 122291140 | 122307920 - | NR_045967    | A730085K08Rik | 14973  | 122292747 | 122292947 |
| 9 | 122714665 | 122745451 + | NM_001013405 | Tcaim         | 0      | 122714626 | 122714826 |
| 9 | 122854207 | 122860119 - | NM_025419    | 1110059G10Rik | -7019  | 122867138 | 122867338 |
| 9 | 122860199 | 122927852 + | NM_010620    | Kif15         | 6939   | 122867138 | 122867338 |
| 9 | 122981428 | 123022324 - | NM_026917    | Zdhhc3        | 3970   | 123018154 | 123018354 |
| 9 | 123022349 | 123045248 + | NM_001081188 | Exosc7        | -3995  | 123018154 | 123018354 |
| 9 | 123022349 | 123045248 + | NM_001081188 | Exosc7        | 11440  | 123033789 | 123033989 |
| 9 | 123276058 | 123371783 + | NM_153168    | Lars2         | 94958  | 123371016 | 123371216 |
| 9 | 123387819 | 123430671 + | NM_013860    | Limd1         | 42128  | 123429947 | 123430147 |
| 9 | 123387819 | 123430671 + | NM_013860    | Limd1         | 7966   | 123395785 | 123395985 |
| 9 | 123439000 | 123501717 + | NM_030692    | Sacm1l        | 59783  | 123498783 | 123498983 |
| 9 | 123439000 | 123501717 + | NM_030692    | Sacm1l        | -8853  | 123429947 | 123430147 |

|   |   |           |             |              |               |        |           |           |
|---|---|-----------|-------------|--------------|---------------|--------|-----------|-----------|
|   | 9 | 123546025 | 123587951 - | NM_139142    | Slc6a20a      | 2204   | 123585547 | 123585747 |
|   | 9 | 123546025 | 123587951 - | NM_139142    | Slc6a20a      | 7415   | 123580336 | 123580536 |
|   | 9 | 123546025 | 123587951 - | NM_139142    | Slc6a20a      | 12815  | 123574936 | 123575136 |
|   | 9 | 124036282 | 124041923 + | NM_009917    | Ccr5          | -5633  | 124030449 | 124030649 |
| X |   | 6735538   | 6896485 -   | NM_001243762 | Clcn5         | 131369 | 6764916   | 6765116   |
| X |   | 6735538   | 6765841 -   | NM_016691    | Clcn5         | 725    | 6764916   | 6765116   |
| X |   | 6988943   | 7000115 -   | NR_027924    | 2010204K13Rik | 1652   | 6998263   | 6998463   |
| X |   | 6989230   | 6998174 -   | NR_027925    | 2010204K13Rik | -89    | 6998263   | 6998463   |
| X |   | 7234505   | 7245313 +   | NM_001290624 | Prickle3      | 227    | 7234732   | 7234932   |
| X |   | 7770972   | 7783652 -   | NM_001308474 | Porcn         | -2870  | 7786522   | 7786722   |
| X |   | 7770972   | 7783652 -   | NM_016913    | Porcn         | -2870  | 7786522   | 7786722   |
| X |   | 7770972   | 7783652 -   | NM_023638    | Porcn         | -2870  | 7786522   | 7786722   |
| X |   | 7770972   | 7783652 -   | NM_145907    | Porcn         | -2870  | 7786522   | 7786722   |
| X |   | 7770972   | 7783652 -   | NM_145908    | Porcn         | -2870  | 7786522   | 7786722   |
| X |   | 7770972   | 7783652 -   | NR_131893    | Porcn         | -2870  | 7786522   | 7786722   |
| X |   | 9829431   | 9898151 +   | NM_008769    | Otc           | 0      | 9829298   | 9829498   |
| X |   | 10062242  | 10173731 +  | NM_019634    | Tspan7        | 17568  | 10079810  | 10080010  |
| X |   | 10062242  | 10173731 +  | NM_019634    | Tspan7        | -7733  | 10054309  | 10054509  |
| X |   | 11613864  | 11737482 -  | NM_001168321 | Bcor          | 2746   | 11734536  | 11734736  |
| X |   | 11613864  | 11737482 -  | NM_001168321 | Bcor          | 74138  | 11663144  | 11663344  |
| X |   | 11613864  | 11657680 -  | NM_029510    | Bcor          | -5464  | 11663144  | 11663344  |
| X |   | 11613864  | 11657680 -  | NM_175044    | Bcor          | -5464  | 11663144  | 11663344  |
| X |   | 11613864  | 11657680 -  | NM_175045    | Bcor          | -5464  | 11663144  | 11663344  |
| X |   | 11613864  | 11657680 -  | NM_175046    | Bcor          | -5464  | 11663144  | 11663344  |
| X |   | 11711580  | 11737473 -  | NR_045434    | 2900008C10Rik | 2737   | 11734536  | 11734736  |
| X |   | 12648624  | 12750454 +  | NM_009481    | Usp9x         | 84983  | 12733607  | 12733807  |
| X |   | 13044798  | 13066440 +  | NM_173415    | Nyx           | -2730  | 13041868  | 13042068  |
| X |   | 13094208  | 13423683 -  | NM_001284503 | Cask          | 124095 | 13299388  | 13299588  |
| X |   | 13094208  | 13423683 -  | NM_001284504 | Cask          | 124095 | 13299388  | 13299588  |
| X |   | 13094208  | 13423683 -  | NM_001284505 | Cask          | 124095 | 13299388  | 13299588  |

|   |          |            |              |               |        |          |          |
|---|----------|------------|--------------|---------------|--------|----------|----------|
| X | 13094208 | 13423683 - | NM_009806    | Cask          | 124095 | 13299388 | 13299588 |
| X | 16196824 | 16264939 + | NM_173740    | Maoa          | 0      | 16196649 | 16196849 |
| X | 16286407 | 16394493 - | NM_172778    | Maob          | 4721   | 16389572 | 16389772 |
| X | 23270177 | 23383128 + | NM_001305675 | Wdr44         | -462   | 23269515 | 23269715 |
| X | 23270177 | 23383128 + | NM_175180    | Wdr44         | -462   | 23269515 | 23269715 |
| X | 35754534 | 35809638 - | NM_001290485 | Lamp2         | 54257  | 35755181 | 35755381 |
| X | 39421013 | 39462842 + | NM_009688    | Xiap          | -8330  | 39412483 | 39412683 |
| X | 39421575 | 39462842 + | NM_001301639 | Xiap          | -8892  | 39412483 | 39412683 |
| X | 39421575 | 39462842 + | NR_125870    | Xiap          | -8892  | 39412483 | 39412683 |
| X | 45499704 | 45514741 + | NM_028773    | Sash3         | -7760  | 45491744 | 45491944 |
| X | 45764226 | 45816310 - | NM_019680    | Elf4          | 23789  | 45792321 | 45792521 |
| X | 45764226 | 45816310 - | NM_019680    | Elf4          | -4347  | 45820657 | 45820857 |
| X | 45764226 | 45816310 - | NM_019680    | Elf4          | -3079  | 45819389 | 45819589 |
| X | 45764226 | 45816310 - | NM_019680    | Elf4          | 44450  | 45771660 | 45771860 |
| X | 46048181 | 46063897 + | NM_173376    | Rbmx2         | -190   | 46047791 | 46047991 |
| X | 68303431 | 68407893 + | NM_001081354 | Mamld1        | 2673   | 68306104 | 68306304 |
| X | 68303431 | 68407893 + | NM_001256048 | Mamld1        | 2673   | 68306104 | 68306304 |
| X | 70918472 | 70927840 + | NM_001142809 | Slc6a8        | -1067  | 70917205 | 70917405 |
| X | 70918472 | 70927840 + | NM_001142810 | Slc6a8        | -1067  | 70917205 | 70917405 |
| X | 70918472 | 70927840 + | NM_133987    | Slc6a8        | -1067  | 70917205 | 70917405 |
| X | 71099119 | 71126174 - | NM_008478    | L1cam         | 3499   | 71122475 | 71122675 |
| X | 73827949 | 73848264 - | NM_001201395 | Cldn34d       | 3770   | 73844294 | 73844494 |
| X | 75007374 | 75041300 - | NM_016979    | Prkx          | 12724  | 75028376 | 75028576 |
| X | 83115612 | 83136839 + | NM_001163539 | 5430427019Rik | 8192   | 83123804 | 83124004 |
| X | 91319970 | 91368747 - | NM_001044386 | Zfx           | 2010   | 91366537 | 91366737 |
| X | 91319970 | 91368747 - | NM_001044386 | Zfx           | 4808   | 91363739 | 91363939 |
| X | 91319970 | 91368747 - | NM_011768    | Zfx           | 2010   | 91366537 | 91366737 |
| X | 91319970 | 91368747 - | NM_011768    | Zfx           | 4808   | 91363739 | 91363939 |
| X | 96331400 | 96344362 + | NM_010110    | Efnb1         | 12230  | 96343630 | 96343830 |
| X | 96600670 | 96639137 - | NR_033544    | Gm14812       | 25042  | 96613895 | 96614095 |

|   |           |             |              |               |        |           |           |
|---|-----------|-------------|--------------|---------------|--------|-----------|-----------|
| X | 98571715  | 98580969 +  | NM_001302496 | Gjb1          | 45     | 98571760  | 98571960  |
| X | 98572574  | 98580969 +  | NM_008124    | Gjb1          | -614   | 98571760  | 98571960  |
| X | 98577457  | 98580969 +  | NM_001302498 | Gjb1          | -5497  | 98571760  | 98571960  |
| X | 98579071  | 98580969 +  | NM_001302497 | Gjb1          | -7111  | 98571760  | 98571960  |
| X | 99380282  | 99383711 -  | NM_009094    | Rps4x         | -84    | 99383795  | 99383995  |
| X | 99709314  | 99839586 -  | NM_008832    | Phka1         | 101699 | 99737687  | 99737887  |
| X | 99709314  | 99839586 -  | NM_173021    | Phka1         | 101699 | 99737687  | 99737887  |
| X | 100756249 | 100819094 - | NR_028381    | Ftx           | 39141  | 100779753 | 100779953 |
| X | 100764844 | 100819094 - | NR_028380    | Ftx           | 39141  | 100779753 | 100779953 |
| X | 101152506 | 101176624 - | NM_011276    | Rlim          | 3676   | 101172748 | 101172948 |
| X | 102275095 | 102312430 + | NM_001281871 | Pbdc1         | 35382  | 102310477 | 102310677 |
| X | 102315735 | 102319251 + | NM_053201    | Magee1        | -5058  | 102310477 | 102310677 |
| X | 104978091 | 105011674 - | NM_025921    | 2610002M06Rik | 17207  | 104994267 | 104994467 |
| X | 104987929 | 105068251 + | NM_001271008 | Fam46d        | 6338   | 104994267 | 104994467 |
| X | 109425017 | 109486040 + | NM_026565    | Apool         | 59545  | 109484562 | 109484762 |
| X | 109608883 | 109671953 + | NM_001168590 | 2010106E10Rik | 12060  | 109620943 | 109621143 |
| X | 109608883 | 109671953 + | NM_001168590 | 2010106E10Rik | 3853   | 109612736 | 109612936 |
| X | 109608883 | 109671953 + | NM_026333    | 2010106E10Rik | 12060  | 109620943 | 109621143 |
| X | 109608883 | 109671953 + | NM_026333    | 2010106E10Rik | 3853   | 109612736 | 109612936 |
| X | 110154201 | 110299125 - | NM_018818    | Chm           | 25448  | 110273477 | 110273677 |
| X | 126284278 | 127000370 + | NM_172493    | Diap2         | 531783 | 126816061 | 126816261 |
| X | 126284278 | 127000370 + | NM_172493    | Diap2         | -4731  | 126279347 | 126279547 |
| X | 131122708 | 131135545 - | NM_013463    | Gla           | 0      | 131135491 | 131135691 |
| X | 131135825 | 131141594 + | NM_019868    | Hnrnp2        | -134   | 131135491 | 131135691 |
| X | 136014906 | 136089120 + | NM_175326    | D330045A20Rik | 39011  | 136053917 | 136054117 |
| X | 136014906 | 136089120 + | NM_175326    | D330045A20Rik | 46714  | 136061620 | 136061820 |
| X | 136014906 | 136089120 + | NM_175326    | D330045A20Rik | 44448  | 136059354 | 136059554 |
| X | 136097879 | 136207685 + | NM_001254761 | Rnf128        | 90088  | 136187967 | 136188167 |
| X | 136145159 | 136207685 + | NM_023270    | Rnf128        | 42808  | 136187967 | 136188167 |
| X | 136991142 | 137010680 + | NM_021463    | Prps1         | 3036   | 136994178 | 136994378 |

|   |           |             |              |         |        |           |           |
|---|-----------|-------------|--------------|---------|--------|-----------|-----------|
| X | 137074068 | 137135062 - | NM_001077364 | Tsc22d3 | 57277  | 137077585 | 137077785 |
| X | 137074068 | 137077727 - | NM_010286    | Tsc22d3 | 0      | 137077585 | 137077785 |
| X | 137074068 | 137077208 - | NR_122039    | Tsc22d3 | -377   | 137077585 | 137077785 |
| X | 138661313 | 138674244 + | NM_001290532 | Nxt2    | 1960   | 138663273 | 138663473 |
| X | 138662480 | 138674244 + | NM_001161430 | Nxt2    | 793    | 138663273 | 138663473 |
| X | 138662720 | 138674244 + | NM_172782    | Nxt2    | 553    | 138663273 | 138663473 |
| X | 138663246 | 138674244 + | NM_001290533 | Nxt2    | 27     | 138663273 | 138663473 |
| X | 138752536 | 138825079 - | NM_001033600 | Acsl4   | 9198   | 138815681 | 138815881 |
| X | 138752536 | 138825079 - | NM_019477    | Acsl4   | 9198   | 138815681 | 138815881 |
| X | 138752536 | 138825079 - | NM_207625    | Acsl4   | 9198   | 138815681 | 138815881 |
| X | 139288017 | 139401272 - | NM_019496    | Ammecr1 | 36491  | 139364581 | 139364781 |
| X | 148667770 | 148713643 + | NM_013668    | Kdm5c   | 27651  | 148695421 | 148695621 |
| X | 148667770 | 148713643 + | NM_013668    | Kdm5c   | 1281   | 148669051 | 148669251 |
| X | 149044052 | 149204030 - | NM_001290684 | Shroom2 | 63753  | 149140077 | 149140277 |
| X | 149044052 | 149204030 - | NM_001290684 | Shroom2 | 121829 | 149082001 | 149082201 |
| X | 149044052 | 149079092 - | NM_001290685 | Shroom2 | -2909  | 149082001 | 149082201 |
| X | 149044052 | 149079092 - | NM_001290686 | Shroom2 | -2909  | 149082001 | 149082201 |
| X | 149044052 | 149078693 - | NM_001290687 | Shroom2 | -3308  | 149082001 | 149082201 |
| X | 149044052 | 149204030 - | NM_172441    | Shroom2 | 63753  | 149140077 | 149140277 |
| X | 149044052 | 149204030 - | NM_172441    | Shroom2 | 121829 | 149082001 | 149082201 |
| X | 160528119 | 160556792 + | NM_020626    | Tmem27  | 23011  | 160551130 | 160551330 |
| X | 160577274 | 160626351 + | NM_001130513 | Ace2    | 15471  | 160592745 | 160592945 |
| X | 160578412 | 160626351 + | NM_027286    | Ace2    | 14333  | 160592745 | 160592945 |
| X | 162895184 | 162917800 - | NM_019773    | Rab9    | 815    | 162916785 | 162916985 |
| X | 163909238 | 165015166 - | NM_001033330 | Frmpd4  | 898337 | 164116629 | 164116829 |
| X | 163909238 | 164560930 - | NM_001290427 | Frmpd4  | 444101 | 164116629 | 164116829 |
| X | 163909238 | 164293010 - | NM_001290428 | Frmpd4  | 176181 | 164116629 | 164116829 |
| X | 166123131 | 166428730 + | NM_001290512 | Mid1    | 304198 | 166427329 | 166427529 |
| X | 166123131 | 166428730 + | NM_010797    | Mid1    | 304198 | 166427329 | 166427529 |
| X | 166266091 | 166428730 + | NM_001290504 | Mid1    | 161238 | 166427329 | 166427529 |

|   |           |             |              |      |        |           |           |
|---|-----------|-------------|--------------|------|--------|-----------|-----------|
| X | 166317551 | 166428730 + | NM_001290505 | Mid1 | 109778 | 166427329 | 166427529 |
| X | 166317551 | 166428730 + | NM_001290506 | Mid1 | 109778 | 166427329 | 166427529 |
